# Supplementary material for: Cell-based HTS identifies a chemical chaperone for preventing ER protein aggregation and proteotoxicity
Source: eLife journal article supplement (doi:10.7554/elife.43302), 2019-12-16
Supplement: supp [file elife-43302-supp-v1.zip]

Archive with 39 entries (39 files):
- elife_poa_e43302_Figure_4_figure_supplement_3.pdf
- elife_poa_e43302_Figure_6_source_data_1.xlsx
- elife_poa_e43302_Figure_4_figure_supplement_5_source_data_1.xlsx
- elife_poa_e43302_Transparent_Reporting_File.docx
- elife_poa_e43302_Figure_3_source_data_1.xlsx
- elife_poa_e43302_Figure_6_figure_supplement_1_source_data_2.xlsx
- elife_poa_e43302_Figure_6_figure_supplement_1.pdf
- elife_poa_e43302_Figure_4_figure_supplement_3_source_data_1.xlsx
- elife_poa_e43302_Figure_5_figure_supplement_1_source_data_2.xlsx
- elife_poa_e43302_Figure_3_figure_supplement_1.pdf
- elife_poa_e43302_Figure_4_figure_supplement_4.pdf
- elife_poa_e43302_Figure_4_figure_supplement_5.pdf
- elife_poa_e43302_Figure_4_figure_supplement_2_source_data_1.xlsx
- elife_poa_e43302_Figure_1_source_data_1.xlsx
- elife_poa_e43302_Figure_4_figure_supplement_2.pdf
- elife_poa_e43302_Figure_5_figure_supplement_1.pdf
- elife_poa_e43302_Figure_2_figure_supplement_1_source_data_1.xlsx
- elife_poa_e43302_Figure_6_figure_supplement_1_source_data_1.xlsx
- elife_poa_e43302_Figure_2_figure_supplement_2_source_data_1.xlsx
- elife_poa_e43302_Figure_4_source_data_1.xlsx
- elife_poa_e43302_Figure_4_figure_supplement_1.pdf
- elife_poa_e43302_Figure_5G_source_data_1.xlsx
- elife_poa_e43302_Figure_6_source_data_1.xlsx
- elife_poa_e43302_Figure_1_figure_supplement_1.pdf
- elife_poa_e43302_Figure_5I_source_data_1.xlsx
- elife_poa_e43302_Figure_6_source_data_3.xlsx
- elife_poa_e43302_Figure_7_source_data_1.xlsx
- elife_poa_e43302_Figure_5_source_data_1.xlsx
- elife_poa_e43302_Figure_2_figure_supplement_2.pdf
- elife_poa_e43302_Figure_5_figure_supplement_1_source_data_1.xlsx
- elife_poa_e43302_Figure_6_source_data_2.xlsx
- elife_poa_e43302_Figure_2_figure_supplement_1.pdf
- elife_poa_e43302_Figure_4_figure_supplement_4_source_data_1.xlsx
- elife_poa_e43302_Figure_4_source_data_1.xlsx
- elife_poa_e43302_Figure_5H_source_data_1.xlsx
- elife_poa_e43302_Figure_1_figure_supplement_1_source_data_1.xlsx
- elife_poa_e43302_Figure_5_figure_supplement_1_source_data_3.xlsx
- elife_poa_e43302_Figure_3_figure_supplement_1_source_data_1.xlsx
- elife_poa_e43302_Figure_6_figure_supplement_1_source_data_3.xlsx
