# Supplementary material for: Cell-based HTS identifies a chemical chaperone for preventing ER protein aggregation and proteotoxicity
Source: eLife journal article supplement (doi:10.7554/elife.43302), 2019-12-16
Supplement: supp [file elife-43302-supp-v1.zip › elife_poa_e43302_Figure_1_figure_supplement_1_source_data_1.xlsx]

## Sheet: Figure 1 Supplement 1A
Figure 1-S1-A
PERK inhibitor I
(μM)
0.5	88.5649	93.8967
0.25	90.68	87.6869
0.125	64.8978	43.5445
0.0625	12.9337	11.4806
0.03125	1.73678	0.738791
0.015625	1.81977	3.4458
0.0078125	8.32767	20.8891
IRE1 inhibitor I
(μM)
500	30.8045	32.7097
250	69.9094	60.4015
125	59.3644	84.6153
62.5	103.46	92.5839
31.25	87.4719	98.6528
15.625	97.7215	100.04
7.8125	97.9779	100.238
S1P inhibitor
(μM)
2.5	25.474	30.9899
1.25	9.5052	16.0546
0.625	10.2895	0.562599
0.3125	11.7568	-1.65886
0.15625	-1.79328	-15.3346
0.078125	-1.64239	-2.66037
0.0390625	-9.95126	-4.4612
