# Supplementary material for: Cell-based HTS identifies a chemical chaperone for preventing ER protein aggregation and proteotoxicity
Source: eLife journal article supplement (doi:10.7554/elife.43302), 2019-12-16
Supplement: supp [file elife-43302-supp-v1.zip › elife_poa_e43302_Figure_1_source_data_1.xlsx]

## Sheet: Figure 1B
Fig1B
	Tm conc
	0	0.116448	0.124996	0.119167	0.128558
	31.25	0.723916	0.978565	0.970897	0.909541
	62.5	1.39498	1.41586	1.31029	1.44373
	125	1.66658	1.51263	1.41084	1.5699
	250	1.54751	1.57754	1.49465	1.51404
	500	1.40341	1.68376	1.62502	1.46818
	1000	1.61983	1.4817	1.60526	1.50926
	2000	1.54028	1.58025	1.55406	1.53621
