# Supplementary material for: Cell-based HTS identifies a chemical chaperone for preventing ER protein aggregation and proteotoxicity
Source: eLife journal article supplement (doi:10.7554/elife.43302), 2019-12-16
Supplement: supp [file elife-43302-supp-v1.zip › elife_poa_e43302_Figure_2_figure_supplement_1_source_data_1.xlsx]

## Sheet: Figure 2 Supplement 1
Figure 2-S1
IBT1 (EUA inhibition)							IBT1 (Viability)
(μM)							(μM)
0.25	8.22173	-7.04014	7.60861	-20.349			10	56.3	71.1	83.6	39.4
0.5	11.3529	4.63307	-9.53138	-4.7615
1.5	11.0096	14.6613	19.9615	8.49489
5	46.7532	41.9585	48.9284	46.5018
10	68.7812	47.1676	35.9449	49.3428
IBT2 (EUA inhibition)							IBT2 (Viability)
(μM)							(μM)
0.25	-4.7407	-23.6045	-6.91576	-12.6592			10	115.1	87.1	116.9	106.5
0.5	7.8914	-12.7082	-3.34144	-7.38924
1.5	6.52704	19.3041	21.2164	14.2965
5	55.5005	36.881	37.741	38.293
10	56.8937	51.8768	51.6863	51.7623
IBT3 (EUA inhibition)							IBT3 (Viability)
(μM)							(μM)
0.25	28.0258	-1.36514	0.33517	4.06967			10	134.7	111.8	78.7	123.1
0.5	20.2412	18.3143	11.4609	13.5508
1.5	46.9278	49.6996	42.7862	53.1429
5	88.1616	88.4676	83.2074	86.8934
10	92.7957	93.8901	94.108	93.8731
IBT4 (EUA inhibition)							IBT4 (Viability)
(μM)							(μM)
0.25	-10.089	5.8498	23.9629	-6.07641			10	73.4	91.7	92.4	85.2
0.5	4.32141	-7.06982	-7.34041	-3.17834
1.5	19.7708	27.8964	29.2958	18.4382
5	46.5991	42.9079	42.5728	40.9148
10	35.3295	52.0693	49.2563	38.9251
IBT5 (EUA inhibition)							IBT5 (Viability)
(μM)							(μM)
0.25	-1.23365	-23.3891	-11.7898	-8.2563			10	88.2	68.4	89.2	91.5
0.5	-4.82126	-4.76027	16.9237	-13.7292
1.5	6.0289	6.98533	9.82643	19.6307
5	27.9241	39.6348	37.4611	41.888
10	68.1771	65.6877	72.0651	70.1489
IBT6 (EUA inhibition)							IBT6 (Viability)
(μM)							(μM)
0.25	1.26538	-15.6517	-2.31288	18.735			10	73.2	104.4	78.1	74.6
0.5	-14.4909	1.69759	35.3483	-3.75261
1.5	-2.23487	21.2265	1.54336	7.33643
5	37.2899	38.382	39.1905	40.5872
10	59.826	53.0338	54.9573	56.8265
IBT7 (EUA inhibition)							IBT7 (Viability)
(μM)							(μM)
0.25	6.75389	-0.388101	-17.8565	-12.7578			10	71.6	46.5	24.7	62.6
0.5	8.93553	-7.87355	-28.3489	-3.7894
1.5	-6.77357	-0.549496	1.97576	-5.04168
5	23.1605	27.2486	26.461	29.9435
10	69.1868	59.3028	54.8831	55.3572
IBT8 (EUA inhibition)							IBT8 (Viability)
(μM)							(μM)
0.25	-24.0099	-14.7851	2.83541	-5.16345			10	100.6	96.6	97.9	111.5
0.5	-3.18695	-3.09534	4.68812	1.52581
1.5	15.7394	21.3235	9.82052	11.64
5	49.5343	46.7195	51.7269	48.8465
10	85.5064	85.6696	88.4286	87.5699
IBT9 (EUA inhibition)							IBT9 (Viability)
(μM)							(μM)
0.25	-10.8751	3.00965	2.85983	17.1455			10	76.1	78.8	67.9	79.9
0.5	-3.51872	-2.61483	1.105	21.9951
1.5	1.76184	3.66305	18.1549	23.8365
5	7.89251	14.4122	20.09	16.6156
10	58.9465	59.7132	64.7627	52.4631
IBT10 (EUA inhibition)							IBT10 (Viability)
(μM)							(μM)
0.25	1.623	5.78958	-2.24006	20.9732			10	67	92.7	83.1	21.1
0.5	1.64716	-0.463594	-3.56873	-6.43547
1.5	32.2967	33.5834	21.8906	17.3796
5	33.6032	42.2638	25.6985	35.6017
10	25.0889	26.5112	25.1135	73.9274
IBT11 (EUA inhibition)							IBT11 (Viability)
(μM)							(μM)
0.25	1.39702	18.8077	-10.1704	-5.7915			10	60.4	70.6	71.3	66.3
0.5	14.7886	2.38873	-7.66832	10.3035
1.5	11.0254	36.5998	34.5529	31.5332
5	77.741	78.6986	77.6895	64.1068
10	89.9216	91.9826	91.6343	92.426
IBT12 (EUA inhibition)							IBT12 (Viability)
(μM)							(μM)
0.25	13.4713	8.28678	-14.0618	-3.18579			10	102.2	87.8	111.4	94
0.5	21.6441	14.0836	1.87929	-0.0663491
1.5	46.0897	46.3904	49.6737	40.3062
5	78.5743	83.4203	82.7831	83.5371
10	91.9753	90.5408	90.406	89.2368
IBT13 (EUA inhibition)							IBT13 (Viability)
(μM)							(μM)
0.25	0.948452	-33.3696	5.17248	15.6844			10	67.9	70.7	61.2	83.7
0.5	-22.8587	-4.11287	-27.6083	-6.72306
1.5	-10.3357	5.40464	12.5439	1.34743
5	39.7523	38.3255	27.5971	33.0121
10	62.0182	61.0314	49.3558	57.8829
IBT14 (EUA inhibition)							IBT14 (Viability)
(μM)							(μM)
0.25	23.8359	35.1518	33.8039	37.621			10	101.2	84.6	88.5	101.1
0.5	53.5614	57.934	55.8501	53.2442
1.5	90.4515	93.9481	94.2728	93.0194
5	98.3433	98.3772	97.7062	98.4806
10	97.7161	98.3411	98.6522	98.6974
IBT15 (EUA inhibition)							IBT15 (Viability)
(μM)							(μM)
0.25	30.2593	38.2617	40.0117	43.8038			10	32	55.3	71.4	59.3
0.5	63.7955	63.0962	63.9885	64.4975
1.5	91.7987	93.4034	90.5982	91.3353
5	94.8285	93.7293	95.8096	97.8911
10	95.9782	95.1319	93.2181	95.8588
IBT16 (EUA inhibition)							IBT16 (Viability)
(μM)							(μM)
0.25	-6.34039	-2.07878	7.29732	-17.5895			10	76.9	46.2	41.9	84.3
0.5	8.12471	4.31517	7.10075	-7.50042
1.5	9.8694	25.1425	-12.469	16.561
5	17.1784	11.2955	25.9763	14.4525
10	43.1726	38.0005	41.3648	41.8911
IBT17 (EUA inhibition)							IBT17 (Viability)
(μM)							(μM)
0.25	26.5171	26.6275	29.7448	28.6485			10	93.5	105.1	86.2	97.6
0.5	56.8964	50.024	62.4189	53.1936
1.5	86.7226	91.1093	90.1045	87.7915
5	97.9801	97.8877	96.4975	97.5366
10	96.6769	95.9143	96.9895	96.0263
IBT18 (EUA inhibition)							IBT18 (Viability)
(μM)							(μM)
0.25	-4.07579	2.23	-14.1481	9.5637			10	91.2	105.2	100.7	88.5
0.5	-6.6208	-16.7822	-3.21592	-21.5845
1.5	-32.7227	-22.4066	-13.3637	-2.98692
5	-16.2378	-7.53112	13.3839	-10.1081
10	-3.90981	-10.8912	0.413762	-3.32904
IBT19 (EUA inhibition)							IBT19 (Viability)
(μM)							(μM)
0.25	7.62866	2.99109	-4.02171	-11.6704			10	47.4	48.1	56.1	39.5
0.5	20.3872	11.6252	28.5203	18.4843
1.5	69.3354	59.1209	64.1518	37.6483
5	89.508	84.7892	88.7071	71.0422
10	82.4716	88.965	82.2934	84.126
IBT20 (EUA inhibition)							IBT20 (Viability)
(μM)							(μM)
0.25	12.0891	5.9565	-8.13366	20.6283			10	76.4	82.1	72.3	85.3
0.5	-9.01507	-10.3476	3.8938	-5.83227
1.5	17.6444	21.4969	29.5052	26.0621
5	54.1209	57.0575	59.9567	60.2737
10	77.1717	77.0045	75.512	75.5284
IBT21 (EUA inhibition)							IBT21 (Viability)
(μM)							(μM)
0.25	17.1592	18.7621	21.9329	36.033			10	96	101.5	99.2	86.9
0.5	41.5875	37.0595	40.5805	42.7102
1.5	77.1593	83.1804	80.6549	78.188
5	95.1599	95.5919	91.1632	85.7135
10	97.6642	96.4637	95.5882	95.8722
IBT22 (EUA inhibition)							IBT22 (Viability)
(μM)							(μM)
0.03125	34.5624	32.414	27.3286	32.1196	23.0022		10	98	84.4	98.2	111
0.0625	53.4428	33.2134	36.6788	35.9603	50.2098
0.125	50.0767	57.4111	47.0033	64.2773	61.1615
0.25	79.3264	80.4875	81.6386	83.54	81.1978
0.5	93.2389	93.0694	95.3759	96.4932	93.5905
1	94.0451	97.0968	97.0214	94.2061	98.6161
IBT23 (EUA inhibition)							IBT23 (Viability)
(μM)							(μM)
0.25	-11.3698	-5.03092	-15.4108	-18.12			10	71.2	71.7	86.5	73.9
0.5	0.790098	-3.43028	-17.9603	0.748685
1.5	6.91301	-6.48573	-15.1998	-8.07312
5	-18.9829	-14.2797	-7.54553	-15.8462
10	-11.8618	-2.33724	-10.0536	-6.88676
IBT24 (EUA inhibition)							IBT24 (Viability)
(μM)							(μM)
0.25	-7.76708	4.38398	-12.0234	9.22496			10	101.8	110	76.3	94
0.5	-14.9567	-20.173	17.703	-19.2671
1.5	-1.53955	9.39288	-9.64269	6.75286
5	8.03541	4.98967	1.47933	-25.6961
10	8.41053	22.1497	1.56399	-3.98309
IBT25 (EUA inhibition)							IBT25 (Viability)
(μM)							(μM)
0.25	-25.9199	-19.7198	16.4027	13.8465			10	55.1	51.6	55.1	66.2
0.5	-19.1414	10.7817	11.6269	-11.2996
1.5	-12.9269	11.2676	12.6083	4.9256
5	-13.246	-19.612	-16.0406	2.32988
10	-19.1676	-10.6331	-3.24856	-12.7803
IBT26 (EUA inhibition)							IBT26 (Viability)
(μM)							(μM)
0.25	-17.6196	6.40368	-16.7778	-23.8331			10	61.6	58.2	58.9	56.3
0.5	15.033	-4.26932	-17.7798	-24.2612
1.5	-23.3266	-15.83	-10.0288	-17.3075
5	-13.6048	-16.8529	6.54129	-12.9916
10	-13.0669	-20.8854	-5.26095	-7.82239
IBT27 (EUA inhibition)							IBT27 (Viability)
(μM)							(μM)
0.25	-19.7348	13.3581	-18.6456	-8.34077			10	68.6	61.5	69.8	54.4
0.5	-20.8305	-22.2283	-24.9694	-11.6959
1.5	-2.11439	-11.2997	-17.064	-17.7267
5	9.1568	-22.5325	-10.4292	25.4996
10	10.7848	-7.89626	-9.19325	3.49465
IBT28 (EUA inhibition)							IBT28 (Viability)
(μM)							(μM)
0.25	2.86566	-0.162305	0.18187	8.24537			10	55.3	55.9	59	88.8
0.5	14.1637	-22.0206	-18.0929	-7.63811
1.5	2.53213	4.05493	10.6594	-1.11182
5	11.3519	-2.8994	10.1269	-18.9593
10	-4.57034	-1.16935	0.433252	11.7788
