# Supplementary material for: Cell-based HTS identifies a chemical chaperone for preventing ER protein aggregation and proteotoxicity
Source: eLife journal article supplement (doi:10.7554/elife.43302), 2019-12-16
Supplement: supp [file elife-43302-supp-v1.zip › elife_poa_e43302_Figure_2_figure_supplement_2_source_data_1.xlsx]

## Sheet: Figure 2 Supplement 2B
Figure 2-S2-B
IBT21
(μM)
0.0390625	16.5911	14.1425	4.74599	13.432
0.078125	27.6078	31.276	26.4603	26.012
0.15625	42.3411	47.6737	47.5262	48.2464
0.3125	65.8031	72.2987	68.1517	71.4908
0.625	88.3076	85.9306	88.5418	89.2385
1.25	96.049	93.6528	96.1316	95.8654
2.5	98.4277	98.2426	96.8547	98.5464
5	98.1207	95.2817	97.484	98.7207
IBT29
(μM)
0.0390625	56.7576	52.293	60.052	50.3799
0.078125	75.6262	84.656	79.324	84.0049
0.15625	94.3826	95.0023	95.8307	94.6448
0.3125	99.6397	96.9476	99.0477	97.7235
0.625	97.8596	98.6591	99.7654	99.4289
1.25	98.5125	98.274	99.4853	98.0412
2.5	98.728	99.478	99.9209	99.9229
5	98.5885	98.5242	99.6805	98.4746
