# Supplementary material for: Cell-based HTS identifies a chemical chaperone for preventing ER protein aggregation and proteotoxicity
Source: eLife journal article supplement (doi:10.7554/elife.43302), 2019-12-16
Supplement: supp [file elife-43302-supp-v1.zip › elife_poa_e43302_Figure_3_figure_supplement_1_source_data_1.xlsx]

## Sheet: Figure 3 Supplement 1B
Figure 3S1-B
UT	358.554	297.779	315.836	304.722	264.551
Tm	894.501	804.241	835.192	837.465	814.228
IBT21	296.24	294.087	289.705	302.764	292.532
