# Supplementary material for: Cell-based HTS identifies a chemical chaperone for preventing ER protein aggregation and proteotoxicity
Source: eLife journal article supplement (doi:10.7554/elife.43302), 2019-12-16
Supplement: supp [file elife-43302-supp-v1.zip › elife_poa_e43302_Figure_3_source_data_1.xlsx]

## Sheet: Figure 3C
Figure 3-C
UT	244.644	278.357	244.141	222.675
Tm	4180.46	3529.32	3743.11	3728.05
IBT21	545.475	546.449	521.868	540.727
Figure 3-E
IBT21
(μM)
0.2	19.3523	19.1061	26.3434	27.49	12.1749	14.9764	18.0559	21.3956
1	52.8028	58.0618	50.7882	53.4648	44.8726	43.8927	46.8221	38.6486
5	91.0233	91.3059	87.9848	84.5318	86.7561	88.1743	85.8998	87.5756
10	91.5998	91.5723	92.2652	91.7336	89.3873	88.328	90.0547	88.2073
AZO
(μM)
1	4.98455	15.9015	23.5617	9.89926
5	23.7933	26.5211	29.7437	26.7355
20	22.7628	39.2037	27.4163	29.1496
40	50.7432	43.828	36.1626	39.4724
4PBA
(μM)
100	-11.8777	9.57938	6.12636	8.42041	4.93854	-4.05387	-4.44889	3.05617
500	-4.99117	-6.74072	-0.361914	3.35727	-3.07437	-5.23197	-3.69386	-12.0796
1000	-5.43921	-2.89645	-1.81938	2.46695	1.30292	0.568534	-4.17042	-4.45505
2000	-4.45505	1.05484	-2.0186	-11.4603	6.76357	-2.91084	-10.6803	-10.7659
5000	27.5443	30.5528	31.1489	34.0697	28.3787	28.4912	25.3088	19.1716
