# Supplementary material for: Cell-based HTS identifies a chemical chaperone for preventing ER protein aggregation and proteotoxicity
Source: eLife journal article supplement (doi:10.7554/elife.43302), 2019-12-16
Supplement: supp [file elife-43302-supp-v1.zip › elife_poa_e43302_Figure_4_figure_supplement_2_source_data_1.xlsx]

## Sheet: Figure 4 Supplement 2B
Figure 4S2-B
ATF4
mock	1.2387	0.802442	0.99096	0.967893
ATF4	2.64784	1.76195	2.80902	3.21624
mock+IBT21	0.877671	0.991269	0.898721	0.744128
ATF4+IBT21	2.76347	2.72838	3.02935	2.06068
CHOP
mock	1.01065	1.00363	1.06433	0.921384
ATF4	1.45554	1.38219	1.52052	1.53614
mock+IBT21	0.900866	1.19679	1.24718	1.08826
ATF4+IBT21	1.72997	1.71012	1.78618	1.26147
4E-BP1
mock	0.969126	0.993758	0.880513	1.1566
ATF4	1.25893	1.37743	1.45668	1.51079
mock+IBT21	0.926846	0.924231	0.655512	0.813165
ATF4+IBT21	1.0274	1.33723	1.64428	1.43945
Figure 4S2-D
ATF6 (N)
mock	0.942207	1.48814	0.686622	0.883033
ATF6 (N)	6.11586	6.86807	6.75677	6.40445
mock+IBT21 (12h)	1.11008	2.67822	1.49463	0.741528
ATF6 (N)+IBT21 (12h)	5.84374	6.89676	5.8206	6.36062
mock+IBT21 (24h)	0.937427	1.97375	1.3368	1.24547
ATF6 (N)+IBT21 (24h)	5.37579	8.33159	6.4844	9.19064
BiP
mock	1.03666	0.807092	1.05872	1.09753
ATF6 (N)	1.52507	1.67796	2.20721	2.12017
mock+IBT21 (12h)	0.883072	0.48962	0.959116	1.209
ATF6 (N)+IBT21 (12h)	1.46501	1.31761	2.02406	2.15003
mock+IBT21 (24h)	1.055	0.554053	1.19098	0.74062
ATF6 (N)+IBT21 (24h)	1.61966	2.30174	2.1997	2.20581
