# Supplementary material for: Cell-based HTS identifies a chemical chaperone for preventing ER protein aggregation and proteotoxicity
Source: eLife journal article supplement (doi:10.7554/elife.43302), 2019-12-16
Supplement: supp [file elife-43302-supp-v1.zip › elife_poa_e43302_Figure_4_figure_supplement_3_source_data_1.xlsx]

## Sheet: Figure 4 Supplement 3B
Figure 4S3-B
UT	0.0329465	0.0784422	0.0344176	0.0406099
Puro	1.24171	1.0914	0.850481	0.816406
CHX 1h	0.58715	0.481492	0.341154	0.31128
CHX 4h	0.436269	0.404747	0.238748	0.208909
IBT21 1h	0.915373	1.01156	0.714569	0.543963
IBT21 4h	0.936771	1.10359	0.767716	0.562978
