# Supplementary material for: Cell-based HTS identifies a chemical chaperone for preventing ER protein aggregation and proteotoxicity
Source: eLife journal article supplement (doi:10.7554/elife.43302), 2019-12-16
Supplement: supp [file elife-43302-supp-v1.zip › elife_poa_e43302_Figure_4_figure_supplement_4_source_data_1.xlsx]

## Sheet: Figure 4 Supplement 4B
Figure 4S4-B
UT	50.6004	49.5217	55.8744	48.3651	50.9603
DTT	2163.12	1821.23	1250.09	1864.43	1591.77
IBT21	845.002	1556.65	1293.93	1124.37	1447.6
