# Supplementary material for: Cell-based HTS identifies a chemical chaperone for preventing ER protein aggregation and proteotoxicity
Source: eLife journal article supplement (doi:10.7554/elife.43302), 2019-12-16
Supplement: supp [file elife-43302-supp-v1.zip › elife_poa_e43302_Figure_4_figure_supplement_5_source_data_1.xlsx]

## Sheet: Figure 4 Supplement 5C
Figure 4S5-C
UT	5.3927	5.82339	6.94993	11.2666	12.0251	13.474	17.8988
5 μM IBT21	3.56042	4.5066	4.75575	5.12447	5.82139	13.9929	17.8005
10 μM IBT21	5.78783	6.88065	9.592	9.85446	11.5591	17.9175	18.9718
HS	26.0236	39.5814	41.1219	45.6151	54.2281	56.2589	61.504
HS+5 μM IBT21	20.5458	40.1749	46.2688	46.452	50.5925	52.5853	59.4671
HS+10 μM IBT21	32.8237	40.9149	47.1997	47.2341	48.6572	71.3165	75.8638
