# Supplementary material for: Cell-based HTS identifies a chemical chaperone for preventing ER protein aggregation and proteotoxicity
Source: eLife journal article supplement (doi:10.7554/elife.43302), 2019-12-16
Supplement: supp [file elife-43302-supp-v1.zip › elife_poa_e43302_Figure_4_source_data_1.xlsx]

## Sheet: Figure 4A
Figure 4-A
（μM)
0	-2.05496	0.713045	3.6838	-2.34188
0.2	44.513	36.9188	41.3345	48.7243
0.5	79.1526	78.3093	76.127	79.6829
1	93.9388	94.8156	93.2414	94.22
2	99.4716	99.0868	99.4623	99.3711
5	99.786	100.027	99.6138	99.7406
Figure 4-B
（μM)
0	-6.1552	4.01003	-4.67931	6.82448
0.2	31.0498	31.419	30.0131	30.4673
0.5	62.0331	68.8409	64.3258	62.6609
1	88.1048	87.9784	90.391	88.5674
2	98.4336	97.8935	97.523	97.4428
5	98.0878	98.9074	99.3498	97.2943
Figure 4-C
（μM)
0	-22.2847	11.2077	-0.794584	11.8716
0.2	22.2214	22.9223	28.6389	25.2101
0.5	61.3229	49.036	51.6366	41.4057
1	72.0131	76.8565	77.4552	77.0321
2	96.877	94.8682	96.4802	94.9111
5	97.4402	95.788	97.3238	97.9975
Figure 4-E
ATF4
Tm	4.84524	3.60155	4.73008	2.99185	3.1266
1 μM IBT21	2.4568	2.23545	3.83397	1.96065	1.32646
5 μM IBT21	1.24023	2.45032	2.00768	3.0254	1.45516
10 μM IBT21	0.987977	2.32251	2.70303	2.01773	1.41066
40 μM AZO	3.15241	4.82005	6.23614	5.54689	3.588
GADD34
Tm	1.59835	2.26512	1.64232	1.66472	2.21405
1 μM IBT21	1.44678	1.72231	1.2363	1.31932	1.35639
5 μM IBT21	0.805415	1.48738	0.914514	0.932669	1.11456
10 μM IBT21	0.653867	1.3955	1.12146	0.84664	0.883952
40 μM AZO	1.62067	2.34313	3.73771	2.45601	2.26298
CHOP
Tm	2.62836	5.1285	4.62063	4.99102	3.7285
1 μM IBT21	2.75613	3.14837	3.28385	3.90362	2.43715
5 μM IBT21	1.67668	1.97781	1.16718	2.00853	1.65985
10 μM IBT21	1.14122	1.89463	1.11704	2.51838	1.76039
40 μM AZO	3.8221	5.56092	5.30766	3.54601	4.86725
DNAJB9
Tm	8.35405	5.21231	10.7614	10.8846
1 μM IBT21	5.66065	2.72408	5.4461	6.34564
5 μM IBT21	6.64251	1.25511	2.19248	3.02803
10 μM IBT21	4.54332	0.940194	2.54674	3.46351
40 μM AZO	6.10655	2.71003	8.0136	9.44002
SEL1L
Tm	6.667	7.58334	8.04636	5.16389
1 μM IBT21	6.99238	8.38405	8.57358	6.21983
5 μM IBT21	4.15605	4.81017	4.28016	4.42689
10 μM IBT21	3.29694	4.136	5.05711	4.063
40 μM AZO	5.13017	7.53703	6.75591	4.48631
HERPUD1
Tm	2.24122	2.4446	2.90254	3.64136
1 μM IBT21	2.70019	2.49951	3.25328	2.73207
5 μM IBT21	2.11154	2.11549	2.22118	1.3558
10 μM IBT21	1.60074	2.16324	2.09682	1.20488
40 μM AZO	1.98414	2.18371	2.02321	1.72158
