# Supplementary material for: Cell-based HTS identifies a chemical chaperone for preventing ER protein aggregation and proteotoxicity
Source: eLife journal article supplement (doi:10.7554/elife.43302), 2019-12-16
Supplement: supp [file elife-43302-supp-v1.zip › elife_poa_e43302_Figure_4_source_data_1.xlsx]

## Sheet: Figure 4 Supplement 1B
Figure 4E
ATF4
UT	0.81908	0.786128	1.46055	0.934241
Tm	5.15031	2.49633	3.66514	3.87309
IBT21	2.1526	1.24448	0.882485	2.24489
PERK i	2.5592	1.48381	0.463077	1.49594
S1P i	5.51445	3.13322	4.13022	4.90577
IRE1 i	3.83095	2.29507	1.13473	3.16433
GADD34
UT	0.974886	1.36571	0.598044	1.06136
Tm	2.2248	2.49788	1.53839	1.60932
IBT21	1.00907	1.08466	0.733703	0.798227
PERK i	0.991661	1.01684	0.742101	0.710715
S1P i	2.76226	2.75434	1.49986	2.06456
IRE1 i	1.77877	1.5525	1.20169	1.18582
CHOP
UT	0.635061	0.88284	1.18198	1.30012
Tm	4.02356	3.68689	3.2741	3.05156
IBT21	1.1544	0.817075	1.95464	1.66805
PERK i	1.24278	0.956191	1.96763	1.33464
S1P i	3.62662	2.98501	4.01464	3.31676
IRE1 i	3.09495	2.02271	2.81294	2.75729
DNAJB9
UT	1.09235	1.01289	0.582464	1.31229
Tm	3.65602	3.26997	4.04104	4.72247
IBT21	1.31667	1.13747	1.96762	1.86448
PERK i	4.68923	3.7285	6.74025	5.37545
S1P i	3.53026	2.83152	5.1272	5.5156
IRE1 i	1.417	1.11979	2.22888	2.60799
SEL1L
UT	0.803213	1.04705	0.974046	1.17569
Tm	1.92955	1.9785	2.05915	1.81592
IBT21	1.23061	1.10691	1.06432	1.2673
PERK i	2.29147	2.88827	1.86607	1.80434
S1P i	1.66543	2.21521	1.53438	2.12648
IRE1 i	1.38527	1.49221	1.15804	1.27875
HERPUD1
UT	1.58645	0.954073	0.668479	0.790993
Tm	4.00681	2.7474	2.65463	2.72324
IBT21	2.42611	1.82836	1.27636	1.29563
PERK i	3.61866	2.98718	2.54437	2.51808
S1P i	2.08048	1.10377	2.14395	0.962774
IRE1 i	1.96224	0.911195	1.61776	1.09772
