# Supplementary material for: Cell-based HTS identifies a chemical chaperone for preventing ER protein aggregation and proteotoxicity
Source: eLife journal article supplement (doi:10.7554/elife.43302), 2019-12-16
Supplement: supp [file elife-43302-supp-v1.zip › elife_poa_e43302_Figure_5_figure_supplement_1_source_data_1.xlsx]

## Sheet: Figure 5 Supplement 1A
Gene	Protein	Accession number	# Peptides	# PSMs	Abundance Ratio: (Tm) / (UT)	Abundance Ratio: (Tm) / (Comp2)	Abundances (UT)	Abundances (Tm)	Abundances (Comp2)
HSPA5	Endoplasmic reticulum chaperone BiP	P11021	31	946	3.775	10.046	69.7	186.1	44.2
TAGLN2	Transgelin-2	P37802	11	774	1.509	1.7	85.5	127.2	87.3
HSP90B1	Endoplasmin	P14625	20	353	1.661	3.775	98.8	158.3	42.9
PDIA4	Protein disulfide-isomerase A4	P13667	20	352	3.181	7.785	62.5	208.9	28.6
PEBP1	Phosphatidylethanolamine-binding protein 1	P30086	6	190	1.749	2.087	73.6	132.6	93.8
PDLIM1	PDZ and LIM domain protein 1	O00151	7	102	1.685	1.872	88.5	134.1	77.4
UBE2N	Ubiquitin-conjugating enzyme E2 N	P61088	4	44	1.824	1.96	79.4	150.7	69.9
ANXA1	Annexin A1	P04083	4	32	1.79	1.895	73.5	154.8	71.7
TKT	Transketolase	P29401	4	28	1.523	3.249	91.4	153	55.6
FUBP1	Far upstream element-binding protein 1	Q96AE4	3	28	1.77	2.103	83.4	146.6	70
EIF3J	Eukaryotic translation initiation factor 3 subunit J	O75822	3	23	1.695	1.82	92.5	130	77.5
HDLBP	Vigilin	Q00341	2	19	1.54	2.64	92.6	147.8	59.7
CNN3	Calponin-3	Q15417	5	17	1.679	2.206	87.4	151.3	61.3
ATIC	Bifunctional purine biosynthesis protein PURH	P31939	5	14	1.54	2.789	102.9	146	51.1
ZC3H15	Zinc finger CCCH domain-containing protein 15	Q8WU90	2	14	1.643	1.68	75.9	116.3	107.8
CDK1	Cyclin-dependent kinase 1	P06493	3	13	1.687	1.566	74.8	121.1	104.1
GSTO1	Glutathione S-transferase omega-1	P78417	2	10	1.544	5.144	101.3	162.4	36.2
EIF2S1	Eukaryotic translation initiation factor 2 subunit 1	P05198	2	6	2.127	2.681	104.6	116	79.3
SEC61A1	Protein transport protein Sec61 subunit alpha isoform 1	P61619	2	6	1.568	2.25	89.4	153.8	56.8
PSAT1	Phosphoserine aminotransferase	Q9Y617	3	5	4.459	2.741	39.1	193.3	67.6
