# Supplementary material for: Cell-based HTS identifies a chemical chaperone for preventing ER protein aggregation and proteotoxicity
Source: eLife journal article supplement (doi:10.7554/elife.43302), 2019-12-16
Supplement: supp [file elife-43302-supp-v1.zip › elife_poa_e43302_Figure_5_figure_supplement_1_source_data_2.xlsx]

## Sheet: Figure 5 Supplement 1B
GO-Term	P-value	GO-Term id	# Genes (observed)	# Genes (expected)	# Genes (total)	List of observed genes
extracellular exosome	6.82396e-06	GO:0070062	12	3.09415	2764	HSPA5, TKT, PSAT1, PEBP1, TAGLN2, HSP90B1, EIF2S1, ATIC, CDK1, ANXA1, UBE2N, GSTO1
extracellular vesicle	7.17519e-06	GO:1903561	12	3.1087	2777	HSPA5, TKT, PSAT1, PEBP1, TAGLN2, HSP90B1, EIF2S1, ATIC, CDK1, ANXA1, UBE2N, GSTO1
extracellular organelle	7.20286e-06	GO:0043230	12	3.10982	2778	HSPA5, TKT, PSAT1, PEBP1, TAGLN2, HSP90B1, EIF2S1, ATIC, CDK1, ANXA1, UBE2N, GSTO1
membrane-bounded vesicle	1.35676e-05	GO:0031988	13	3.96619	3543	HSPA5, TKT, PDIA4, PSAT1, PEBP1, TAGLN2, HSP90B1, EIF2S1, ATIC, CDK1, ANXA1, UBE2N, GSTO1
vesicle	2.06003e-05	GO:0031982	13	4.11396	3675	HSPA5, TKT, PDIA4, PSAT1, PEBP1, TAGLN2, HSP90B1, EIF2S1, ATIC, CDK1, ANXA1, UBE2N, GSTO1
extracellular region part	2.77737e-05	GO:0044421	13	4.22367	3773	HDLBP, HSPA5, TKT, PSAT1, PEBP1, TAGLN2, HSP90B1, EIF2S1, ATIC, CDK1, ANXA1, UBE2N, GSTO1
focal adhesion	5.78445e-05	GO:0005925	5	0.437703	391	HSPA5, CNN3, PDLIM1, HSP90B1, ANXA1
cell-substrate adherens junction	5.99822e-05	GO:0005924	5	0.441061	394	HSPA5, CNN3, PDLIM1, HSP90B1, ANXA1
cell-substrate junction	6.29271e-05	GO:0030055	5	0.445539	398	HSPA5, CNN3, PDLIM1, HSP90B1, ANXA1
endoplasmic reticulum chaperone complex	6.5086e-05	GO:0034663	2	0.0123139	11	HSPA5, HSP90B1
eukaryotic 48S preinitiation complex	0.000123921	GO:0033290	2	0.0167917	15	EIF2S1, EIF3J
adherens junction	0.000136485	GO:0005912	5	0.52502	469	HSPA5, CNN3, PDLIM1, HSP90B1, ANXA1
translation preinitiation complex	0.000141528	GO:0070993	2	0.0179111	16	EIF2S1, EIF3J
anchoring junction	0.000165951	GO:0070161	5	0.547408	489	HSPA5, CNN3, PDLIM1, HSP90B1, ANXA1
pigment granule	0.000197537	GO:0048770	3	0.115303	103	HSPA5, PDIA4, HSP90B1
melanosome	0.000197537	GO:0042470	3	0.115303	103	HSPA5, PDIA4, HSP90B1
extracellular region	0.000198573	GO:0005576	13	5.04086	4503	HDLBP, HSPA5, TKT, PSAT1, PEBP1, TAGLN2, HSP90B1, EIF2S1, ATIC, CDK1, ANXA1, UBE2N, GSTO1
cytosol	0.000375415	GO:0005829	11	3.8285	3420	TKT, SEC61A1, PSAT1, PEBP1, HSP90B1, EIF2S1, ATIC, CDK1, UBE2N, GSTO1, EIF3J
midbody	0.000409907	GO:0030496	3	0.147767	132	HSPA5, HSP90B1, CDK1
myelin sheath	0.00082769	GO:0043209	3	0.188067	168	HSPA5, TKT, GSTO1
endoplasmic reticulum lumen	0.00136886	GO:0005788	3	0.223889	200	HSPA5, PDIA4, HSP90B1
UBC13-UEV1A complex	0.00223651	GO:0035370	1	0.00223889	2	UBE2N
UBC13-MMS2 complex	0.00223651	GO:0031372	1	0.00223889	2	UBE2N
cytoplasm	0.00263397	GO:0005737	18	11.7676	10512	ZC3H15, HDLBP, HSPA5, CNN3, TKT, PDIA4, SEC61A1, PDLIM1, PSAT1, PEBP1, HSP90B1, EIF2S1, ATIC, CDK1, ANXA1, UBE2N, GSTO1, EIF3J
glial limiting end-foot	0.00335476	GO:0097451	1	0.00335833	3	EIF2S1
eukaryotic translation initiation factor 2 complex	0.00335476	GO:0005850	1	0.00335833	3	EIF2S1
extrinsic component of endosome membrane	0.00558532	GO:0031313	1	0.00559722	5	ANXA1
astrocyte end-foot	0.00558532	GO:0097450	1	0.00559722	5	EIF2S1
eukaryotic translation initiation factor 2B complex	0.00669881	GO:0005851	1	0.00671667	6	EIF2S1
cell junction	0.00755658	GO:0030054	5	1.28848	1151	HSPA5, CNN3, PDLIM1, HSP90B1, ANXA1
extrinsic component of external side of plasma membrane	0.00781111	GO:0031232	1	0.00783611	7	ANXA1
integral component of endoplasmic reticulum membrane	0.0088931	GO:0030176	2	0.143289	128	HSPA5, SEC61A1
extrinsic component of vacuolar membrane	0.00892222	GO:0000306	1	0.00895556	8	ANXA1
intrinsic component of endoplasmic reticulum membrane	0.00957221	GO:0031227	2	0.148886	133	HSPA5, SEC61A1
