# Supplementary material for: Cell-based HTS identifies a chemical chaperone for preventing ER protein aggregation and proteotoxicity
Source: eLife journal article supplement (doi:10.7554/elife.43302), 2019-12-16
Supplement: supp [file elife-43302-supp-v1.zip › elife_poa_e43302_Figure_5_figure_supplement_1_source_data_3.xlsx]

## Sheet: Figure 5 Supplement 1C
GO-Term	P-value	GO-Term id	# Genes (observed)	# Genes (expected)	# Genes (total)	List of observed genes
response to endoplasmic reticulum stress	1.07483e-05	GO:0034976	5	0.308359	256	SEC61A1, PDIA4, HSPA5, EIF2S1, HSP90B1
endoplasmic reticulum unfolded protein response	1.43831e-05	GO:0030968	4	0.152975	127	SEC61A1, HSPA5, EIF2S1, HSP90B1
cellular response to unfolded protein	1.5772e-05	GO:0034620	4	0.156589	130	SEC61A1, HSPA5, EIF2S1, HSP90B1
ER-nucleus signaling pathway	1.66504e-05	GO:0006984	3	0.0505902	42	HSPA5, EIF2S1, HSP90B1
cellular response to topologically incorrect protein	1.99584e-05	GO:0035967	4	0.166225	138	SEC61A1, HSPA5, EIF2S1, HSP90B1
response to unfolded protein	4.31709e-05	GO:0006986	4	0.202361	168	SEC61A1, HSPA5, EIF2S1, HSP90B1
water-soluble vitamin biosynthetic process	4.93727e-05	GO:0042364	2	0.0108408	9	GSTO1, PSAT1
response to topologically incorrect protein	5.40949e-05	GO:0035966	4	0.214406	178	SEC61A1, HSPA5, EIF2S1, HSP90B1
ATF6-mediated unfolded protein response	6.16713e-05	GO:0036500	2	0.0120453	10	HSPA5, HSP90B1
cellular response to manganese ion	6.16713e-05	GO:0071287	2	0.0120453	10	HSPA5, EIF2S1
protein folding in endoplasmic reticulum	7.53214e-05	GO:0034975	2	0.0132498	11	HSPA5, HSP90B1
response to manganese ion	0.000185441	GO:0010042	2	0.020477	17	HSPA5, EIF2S1
PERK-mediated unfolded protein response	0.000258509	GO:0036499	2	0.0240906	20	HSPA5, EIF2S1
response to inorganic substance	0.000260961	GO:0010035	5	0.603469	501	HSPA5, EIF2S1, ATIC, CDK1, ANXA1
vitamin biosynthetic process	0.000343489	GO:0009110	2	0.0277042	23	GSTO1, PSAT1
response to transition metal nanoparticle	0.000707779	GO:1990267	3	0.17827	148	HSPA5, EIF2S1, CDK1
cellular response to stress	0.000776398	GO:0033554	8	2.19586	1823	SEC61A1, PDIA4, HSPA5, EIF2S1, CDK1, ANXA1, UBE2N, HSP90B1
positive regulation of protein ubiquitination	0.00113087	GO:0031398	3	0.209588	174	HSPA5, CDK1, UBE2N
negative regulation of molecular function	0.00122564	GO:0044092	6	1.28403	1066	HSPA5, CNN3, GSTO1, CDK1, ANXA1, PEBP1
regeneration	0.00128719	GO:0031099	3	0.219224	182	ATIC, CDK1, ANXA1
positive regulation of protein modification by small protein conjugation or removal	0.00139148	GO:1903322	3	0.225247	187	HSPA5, CDK1, UBE2N
protein folding	0.00224317	GO:0006457	3	0.266201	221	PDIA4, HSPA5, HSP90B1
small molecule biosynthetic process	0.00227647	GO:0044283	4	0.575765	478	TKT, GSTO1, ANXA1, PSAT1
neutrophil clearance	0.0024063	GO:0097350	1	0.00240906	2	ANXA1
pyridoxine metabolic process	0.0024063	GO:0008614	1	0.00240906	2	PSAT1
vitamin B6 biosynthetic process	0.0024063	GO:0042819	1	0.00240906	2	PSAT1
hindbrain structural organization	0.0024063	GO:0021577	1	0.00240906	2	HSPA5
regulation of ATF6-mediated unfolded protein response	0.0024063	GO:1903891	1	0.00240906	2	HSPA5
positive regulation of neutrophil apoptotic process	0.0024063	GO:0033031	1	0.00240906	2	ANXA1
myoblast migration involved in skeletal muscle regeneration	0.0024063	GO:0014839	1	0.00240906	2	ANXA1
cerebellum structural organization	0.0024063	GO:0021589	1	0.00240906	2	HSPA5
DNA rewinding	0.0024063	GO:0036292	1	0.00240906	2	ANXA1
pyridoxine biosynthetic process	0.0024063	GO:0008615	1	0.00240906	2	PSAT1
xylulose biosynthetic process	0.0024063	GO:0005999	1	0.00240906	2	TKT
glyceraldehyde-3-phosphate biosynthetic process	0.0024063	GO:0046166	1	0.00240906	2	TKT
actin rod assembly	0.0024063	GO:0031247	1	0.00240906	2	HSP90B1
ER-associated ubiquitin-dependent protein catabolic process	0.0028232	GO:0030433	2	0.0794989	66	HSPA5, HSP90B1
IRE1-mediated unfolded protein response	0.0028232	GO:0036498	2	0.0794989	66	SEC61A1, HSPA5
regulation of protein ubiquitination	0.00296987	GO:0031396	3	0.293905	244	HSPA5, CDK1, UBE2N
carboxylic acid biosynthetic process	0.00332615	GO:0046394	3	0.30595	254	GSTO1, ANXA1, PSAT1
response to manganese-induced endoplasmic reticulum stress	0.00360945	GO:1990737	1	0.00361359	3	EIF2S1
regulation of neutrophil apoptotic process	0.00360945	GO:0033029	1	0.00361359	3	ANXA1
dihydrofolate metabolic process	0.00360945	GO:0046452	1	0.00361359	3	ATIC
L-ascorbic acid biosynthetic process	0.00360945	GO:0019853	1	0.00361359	3	GSTO1
negative regulation of phospholipase A2 activity	0.00360945	GO:1900138	1	0.00361359	3	ANXA1
regulation of Schwann cell differentiation	0.00360945	GO:0014038	1	0.00361359	3	CDK1
ubiquitin-dependent protein catabolic process	0.00368091	GO:0006511	4	0.657673	546	HSPA5, CDK1, UBE2N, HSP90B1
regulation of protein modification by small protein conjugation or removal	0.00370774	GO:1903320	3	0.317996	264	HSPA5, CDK1, UBE2N
cellular response to hydrogen peroxide	0.00382071	GO:0070301	2	0.0927487	77	CDK1, ANXA1
epithelial cell differentiation	0.00382787	GO:0030855	4	0.6649	552	CNN3, CDK1, ANXA1, TAGLN2
modification-dependent protein catabolic process	0.00387774	GO:0019941	4	0.667309	554	HSPA5, CDK1, UBE2N, HSP90B1
modification-dependent macromolecule catabolic process	0.00408167	GO:0043632	4	0.676945	562	HSPA5, CDK1, UBE2N, HSP90B1
organic acid biosynthetic process	0.0041574	GO:0016053	3	0.331245	275	GSTO1, ANXA1, PSAT1
regulation of translational initiation	0.00432089	GO:0006446	2	0.0987714	82	EIF3J, EIF2S1
ERAD pathway	0.00442439	GO:0036503	2	0.0999759	83	HSPA5, HSP90B1
organ regeneration	0.00442439	GO:0031100	2	0.0999759	83	ATIC, CDK1
maintenance of location	0.0045045	GO:0051235	3	0.340882	283	HSPA5, GSTO1, HSP90B1
pentose biosynthetic process	0.00480985	GO:0019322	1	0.00481812	4	TKT
xylulose metabolic process	0.00480985	GO:0005997	1	0.00481812	4	TKT
regulation of skeletal muscle contraction by regulation of release of sequestered calcium ion	0.00480985	GO:0014809	1	0.00481812	4	GSTO1
negative regulation of interleukin-8 secretion	0.00480985	GO:2000483	1	0.00481812	4	ANXA1
positive regulation of type B pancreatic cell apoptotic process	0.00480985	GO:2000676	1	0.00481812	4	EIF2S1
vitamin B6 metabolic process	0.00480985	GO:0042816	1	0.00481812	4	PSAT1
L-serine biosynthetic process	0.00480985	GO:0006564	1	0.00481812	4	PSAT1
negative regulation of T-helper 2 cell differentiation	0.00480985	GO:0045629	1	0.00481812	4	ANXA1
water-soluble vitamin metabolic process	0.00495905	GO:0006767	2	0.105999	88	GSTO1, PSAT1
cerebellum development	0.00518087	GO:0021549	2	0.108408	90	HSPA5, ATIC
proteolysis involved in cellular protein catabolic process	0.0055929	GO:0051603	4	0.739581	614	HSPA5, CDK1, UBE2N, HSP90B1
regulation of skeletal muscle contraction by calcium ion signaling	0.00600886	GO:0014722	1	0.00602265	5	GSTO1
neutrophil apoptotic process	0.00600886	GO:0001781	1	0.00602265	5	ANXA1
negative regulation of protein homodimerization activity	0.00600886	GO:0090074	1	0.00602265	5	HSPA5
posttranslational protein targeting to membrane	0.00600886	GO:0006620	1	0.00602265	5	SEC61A1
metencephalon development	0.00623471	GO:0022037	2	0.119248	99	HSPA5, ATIC
positive regulation of ubiquitin-protein transferase activity	0.00635736	GO:0051443	2	0.120453	100	CDK1, UBE2N
cellular protein catabolic process	0.00668772	GO:0044257	4	0.778126	646	HSPA5, CDK1, UBE2N, HSP90B1
response to metal ion	0.00707316	GO:0010038	3	0.401108	333	HSPA5, EIF2S1, CDK1
cellular response to chemical stimulus	0.00719652	GO:0070887	8	3.09925	2573	SEC61A1, HSPA5, ZC3H15, GSTO1, EIF2S1, CDK1, ANXA1, HSP90B1
positive regulation of T-helper 1 cell differentiation	0.0072065	GO:0045627	1	0.00722717	6	ANXA1
prolactin secretion	0.0072065	GO:0070459	1	0.00722717	6	ANXA1
'de novo' IMP biosynthetic process	0.0072065	GO:0006189	1	0.00722717	6	ATIC
positive regulation of unsaturated fatty acid biosynthetic process	0.0072065	GO:2001280	1	0.00722717	6	ANXA1
Golgi disassembly	0.0072065	GO:0090166	1	0.00722717	6	CDK1
pentose-phosphate shunt, non-oxidative branch	0.0072065	GO:0009052	1	0.00722717	6	TKT
regulation of protein folding	0.0072065	GO:1903332	1	0.00722717	6	HSPA5
positive regulation of myeloid cell apoptotic process	0.0072065	GO:0033034	1	0.00722717	6	ANXA1
positive regulation of prostaglandin biosynthetic process	0.0072065	GO:0031394	1	0.00722717	6	ANXA1
sequestering of calcium ion	0.00724673	GO:0051208	2	0.128885	107	GSTO1, HSP90B1
positive regulation of mitotic cell cycle	0.00805142	GO:0045931	2	0.136112	113	CDK1, ANXA1
proteasome-mediated ubiquitin-dependent protein catabolic process	0.00817315	GO:0043161	3	0.42279	351	HSPA5, CDK1, HSP90B1
regulation of ubiquitin-protein transferase activity	0.00832825	GO:0051438	2	0.138521	115	CDK1, UBE2N
negative regulation of phospholipase activity	0.00840276	GO:0010519	1	0.0084317	7	ANXA1
brainstem development	0.00840276	GO:0003360	1	0.0084317	7	ATIC
tetrahydrofolate biosynthetic process	0.00840276	GO:0046654	1	0.0084317	7	ATIC
negative regulation of translational initiation in response to stress	0.00840276	GO:0032057	1	0.0084317	7	EIF2S1
cellular response to starvation	0.00846826	GO:0009267	2	0.139725	116	HSPA5, EIF2S1
sequestering of metal ion	0.00918421	GO:0051238	2	0.145748	121	GSTO1, HSP90B1
protein localization to endoplasmic reticulum	0.00933056	GO:0070972	2	0.146953	122	SEC61A1, HSPA5
response to hydrogen peroxide	0.00947796	GO:0042542	2	0.148157	123	CDK1, ANXA1
activation of signaling protein activity involved in unfolded protein response	0.00959764	GO:0006987	1	0.00963623	8	HSPA5
positive regulation of ryanodine-sensitive calcium-release channel activity	0.00959764	GO:0060316	1	0.00963623	8	GSTO1
negative regulation of translation in response to stress	0.00959764	GO:0032055	1	0.00963623	8	EIF2S1
regulation of prostaglandin biosynthetic process	0.00959764	GO:0031392	1	0.00963623	8	ANXA1
regulation of unsaturated fatty acid biosynthetic process	0.00959764	GO:2001279	1	0.00963623	8	ANXA1
