# Supplementary material for: Cell-based HTS identifies a chemical chaperone for preventing ER protein aggregation and proteotoxicity
Source: eLife journal article supplement (doi:10.7554/elife.43302), 2019-12-16
Supplement: supp [file elife-43302-supp-v1.zip › elife_poa_e43302_Figure_5_source_data_1.xlsx]

## Sheet: Figure 5B
Figure 5-B
UT	0.998952	1.0838	0.824586	0.89219	1.19206	0.873956	0.92256	1.2119
MG132	2.1903	3.36247	2.45536	2.56034	1.70758	2.55336	2.31845	1.51112
Tm	1.66018	2.9719	2.24537	2.54145	1.91585	2.65748	2.69737	1.58433
Tm+IBT21	0.773062	0.803546	1.05429	0.836769	0.915611	0.675689	0.867667	1.00478
Figure 5-C
UT	0.811372	1.12275	1.06588
DTT	3.81292	4.12546	3.51108
1 μM IBT21	3.24558	3.54736	3.42997
10 μM IBT21	2.43865	2.5197	2.89774
10 μM 4PBA	3.45376	3.5447	3.52609
1000 μM 4PBA	3.23355	2.82127	3.02678
10 μM AZO	3.22937	3.96777	3.58564
100 μM AZO	3.83901	3.88927	3.74758
Figure 5-F
AGGREGATED BiP
UT	1.34608	0.932672	0.721245
Tm	3.73296	2.6921	2.98818
Tm+IBT21	1.91195	1.19529	1.90702
INPUT BiP
UT	1.05897	1.08043	0.860608
Tm	1.76159	1.35262	1.48725
Tm+IBT21	1.64252	0.975772	0.894587
