# Supplementary material for: Cell-based HTS identifies a chemical chaperone for preventing ER protein aggregation and proteotoxicity
Source: eLife journal article supplement (doi:10.7554/elife.43302), 2019-12-16
Supplement: supp [file elife-43302-supp-v1.zip › elife_poa_e43302_Figure_5G_source_data_1.xlsx]

## Sheet: Figure 5G
Gene	Protein	Accession number	# Peptides	# PSMs	Abundance Ratio: (Tm) / (UT)	Abundance Ratio: (Tm) / (Comp2)	Abundances (UT)	Abundances (Tm)	Abundances (Comp2)
KRT1	Keratin, type II cytoskeletal 1	P04264	43	2257	2.352	4.756	69.7	176.9	53.4
KRT9	Keratin, type I cytoskeletal 9	P35527	39	1701	2.624	5.629	55.6	204.1	40.4
KRT10	Keratin, type I cytoskeletal 10	P13645	39	1529	1.798	3.873	84.6	168.3	47.1
KRT2	Keratin, type II cytoskeletal 2 epidermal	P35908	42	1032	2.11	3.951	79.4	173.5	47.1
KRT5	Keratin, type II cytoskeletal 5	P13647	39	671	2.472	3.898	68.5	172.6	58.9
KRT14	Keratin, type I cytoskeletal 14	P02533	35	631	2.162	4.817	80.5	181.7	37.8
KRT6B	Keratin, type II cytoskeletal 6B	P04259	35	586	2.11	10.85	74.4	208.3	17.3
KRT6A	Keratin, type II cytoskeletal 6A	P02538	35	539	1.8	5.047	81.3	183.3	35.3
HSPA5	Endoplasmic reticulum chaperone BiP	P11021	36	516	16.705	12.459	33.5	227.6	38.9
KRT16	Keratin, type I cytoskeletal 16	P08779	32	516	2.204	6.986	82.5	195.9	21.6
ENO1	Alpha-enolase	P06733	24	371	1.93	2.151	74	139.4	86.6
EEF2	Elongation factor 2	P13639	30	298	1.611	2.085	77.8	138.2	84.1
KRT17	Keratin, type I cytoskeletal 17	Q04695	27	259	2.026	3.968	83.9	171.5	44.6
PKM	Pyruvate kinase PKM	P14618	21	253	1.742	1.587	75	135.9	89.1
TUBB2A	Tubulin beta-2A chain	Q13885	12	236	10.089	7.335	24.1	242.8	33.1
GAPDH	Glyceraldehyde-3-phosphate dehydrogenase	P04406	13	230	1.829	2.22	84	146.4	69.7
HMGB1	High mobility group protein B1	P09429	11	226	2.229	1.63	58.9	147.8	93.3
RPL27	60S ribosomal protein L27	P61353	7	213	1.824	1.72	66.4	140.5	93.1
PPIA	Peptidyl-prolyl cis-trans isomerase A	P62937	9	194	1.761	1.802	85.3	146.4	68.2
PRDX1	Peroxiredoxin-1	Q06830	13	191	1.763	1.51	80.6	124.1	95.3
KRT77	Keratin, type II cytoskeletal 1b	Q7Z794	4	163	1.967	2.019	76.1	149.7	74.2
DCD	Dermcidin	P81605	4	159	1.507	4.324	92.7	150.1	57.3
EEF1D	Elongation factor 1-delta	P29692	9	159	2.057	1.878	64.5	169.7	65.8
HSP90AA1	Heat shock protein HSP 90-alpha	P07900	18	146	1.539	1.649	76.3	140.9	82.8
GSTP1	Glutathione S-transferase P	P09211	7	133	1.86	3.572	80.3	147.9	71.9
TAGLN2	Transgelin-2	P37802	12	133	1.707	2.179	81.4	140.9	77.8
LDHB	L-lactate dehydrogenase B chain	P07195	14	130	1.544	1.716	83.9	136	80.1
TPI1	Triosephosphate isomerase	P60174	10	125	2.03	2.164	61.6	153.9	84.5
STIP1	Stress-induced-phosphoprotein 1	P31948	23	114	1.759	2.084	74.7	154.6	70.7
RPS27A	Ubiquitin-40S ribosomal protein S27a	P62979	6	114	1.839	1.558	81.2	138	80.8
RPS25	40S ribosomal protein S25	P62851	4	109	2.014	2.153	71.1	161.8	67.1
DSP	Desmoplakin	P15924	42	108	2.457	2.346	63.3	161.4	75.3
PDIA4	Protein disulfide-isomerase A4	P13667	21	106	5.912	3.235	38.2	201.3	60.5
HSP90B1	Endoplasmin	P14625	18	104	2.346	1.797	68.3	148.8	83
HRNR	Hornerin	Q86YZ3	13	83	3.531	5.387	50.7	209.1	40.2
PARK7	Protein/nucleic acid deglycase DJ-1	Q99497	10	75	1.833	1.926	80.4	140.5	79
GANAB	Neutral alpha-glucosidase AB	Q14697	16	65	1.971	1.672	69.5	143.4	87.1
PRDX2	Peroxiredoxin-2	P32119	7	64	1.851	2.733	73.6	149.9	76.5
UBA1	Ubiquitin-like modifier-activating enzyme 1	P22314	17	62	2.404	1.703	74.1	139.6	86.3
MSN	Moesin	P26038	19	61	1.806	1.751	74.4	140.8	84.8
PPIB	Peptidyl-prolyl cis-trans isomerase B	P23284	6	60	1.554	1.909	80.6	158.1	61.4
TMPO	Lamina-associated polypeptide 2, isoform alpha	P42166	8	59	1.676	1.697	86.5	138.7	74.9
PEBP1	Phosphatidylethanolamine-binding protein 1	P30086	5	55	1.969	2.548	76.9	148.5	74.6
PGK1	Phosphoglycerate kinase 1	P00558	10	54	1.726	2.417	71.7	143.2	85.1
PRDX6	Peroxiredoxin-6	P30041	5	54	1.79	2.264	77.6	159.2	63.2
MTHFD1	C-1-tetrahydrofolate synthase, cytoplasmic	P11586	18	54	2.611	1.957	64.9	152.4	82.7
HMGB2	High mobility group protein B2	P26583	9	50	2.029	2.134	70.9	159	70.1
PLS3	Plastin-3	P13797	9	48	1.742	2.468	87.7	151	61.2
DSG1	Desmoglein-1	Q02413	15	47	2.049	3.663	93.9	160.4	45.7
NME1	Nucleoside diphosphate kinase A	P15531	3	45	2.654	1.98	60.1	159.4	80.5
EZR	Ezrin	P15311	13	44	2.136	1.95	62.9	145.6	91.5
KRT78	Keratin, type II cytoskeletal 78	Q8N1N4	9	42	6.412	5.176	45.6	201.1	53.3
SUMO2	Small ubiquitin-related modifier 2	P61956	2	42	2.593	2.302	63.6	160.4	76
YWHAQ	14-3-3 protein theta	P27348	5	40	3.202	2.814	56.2	179.9	63.9
PHGDH	D-3-phosphoglycerate dehydrogenase	O43175	8	38	2.843	2.485	70.2	159.8	70
RAN	GTP-binding nuclear protein Ran	P62826	6	38	2.461	1.864	72.3	147.3	80.5
EIF4B	Eukaryotic translation initiation factor 4B	P23588	12	34	2.385	1.672	58.5	147.2	94.3
FLG2	Filaggrin-2	Q5D862	6	33	2.984	2.396	59.9	164.3	75.8
PFDN2	Prefoldin subunit 2	Q9UHV9	5	30	1.821	3.318	87.1	158.4	54.4
ST13	Hsc70-interacting protein	P50502	5	30	2.363	2.415	66.4	170.6	63
KHSRP	Far upstream element-binding protein 2	Q92945	8	30	1.593	2.117	66.6	156.7	76.6
PDLIM1	PDZ and LIM domain protein 1	O00151	4	30	2.064	1.674	51	147.6	101.5
ARF3	ADP-ribosylation factor 3	P61204	6	29	1.767	3.087	86.9	144	69.1
YWHAE	14-3-3 protein epsilon	P62258	4	28	2.294	2.268	69.7	159.8	70.5
JUP	Junction plakoglobin	P14923	10	26	2.799	3.375	58.4	187.7	53.8
HYOU1	Hypoxia up-regulated protein 1	Q9Y4L1	12	25	5.522	7.367	40.3	230.1	29.6
CTSD	Cathepsin D	P07339	10	24	6.336	5.144	47.5	211.2	41.3
PGAM1; LOC643576	Phosphoglycerate mutase 1	P18669	5	24	2.358	2.221	59.9	156.2	84
TKT	Transketolase	P29401	11	23	2.006	1.504	73.8	139.8	86.5
CTSZ	Cathepsin Z	Q9UBR2	6	21	4.899	3.371	34.6	209.6	55.8
CKB	Creatine kinase B-type	P12277	4	21	1.759	2.714	78.2	172.2	49.7
AHCY	Adenosylhomocysteinase	P23526	4	19	2.326	3.577	54.7	185.9	59.5
TARS	Threonine--tRNA ligase, cytoplasmic	P26639	7	19	1.858	1.997	74.9	150.9	74.1
FUBP1	Far upstream element-binding protein 1	Q96AE4	6	19	1.736	1.738	82.9	138.3	78.8
SF1	Splicing factor 1	Q15637	9	19	1.536	1.634	72.3	139.8	87.8
DHX15	Pre-mRNA-splicing factor ATP-dependent RNA helicase DHX15	O43143	4	18	1.739	2.149	84	136	80
VCL	Vinculin	P18206	9	17	1.792	7.528	76.2	173.1	50.7
SNRPB	Small nuclear ribonucleoprotein-associated proteins B and B'	P14678	4	17	1.613	1.593	71.3	152.4	76.3
CCT7	T-complex protein 1 subunit eta	Q99832	6	16	3.369	2.306	82.4	144.7	72.9
SSB	Lupus La protein	P05455	4	16	1.738	1.843	84.8	140.1	75.1
SBSN	Suprabasin	Q6UWP8	3	15	8.28	4.808	23.9	231	45
S100A11	Protein S100-A11	P31949	4	15	1.788	1.56	76.2	124.8	99
PRCP	Lysosomal Pro-X carboxypeptidase	P42785	4	14	8.188	8.211	24.8	242.5	32.7
HSPA4	Heat shock 70 kDa protein 4	P34932	7	14	1.853	2.043	66.2	141.9	91.9
ARF4	ADP-ribosylation factor 4	P18085	4	13	2.707	2.263	69	159.5	71.5
DNAJC8	DnaJ homolog subfamily C member 8	O75937	4	13	1.84	1.557	75.2	146.7	78.1
CLU	Clusterin	P10909	5	12	2.816	6.001	28.4	258.1	13.5
EIF2S3	Eukaryotic translation initiation factor 2 subunit 3	P41091	3	12	23.577	5.257	48.5	197.4	54.1
CNN3	Calponin-3	Q15417	4	11	3.841	5.38	51.9	199.5	48.6
PFDN6	Prefoldin subunit 6	O15212	2	11	4.279	4.152	30.1	230.7	39.2
ARHGDIA	Rho GDP-dissociation inhibitor 1	P52565	2	11	2.666	2.388	63.2	166.2	70.6
GGH	Gamma-glutamyl hydrolase	Q92820	6	10	8.742	3.769	27.1	224	48.9
SART1	U4/U6.U5 tri-snRNP-associated protein 1	O43290	3	10	2.305	2.708	75.5	123	101.6
PKP1	Plakophilin-1	Q13835	5	10	3.211	2.144	39.6	156.3	104.1
VBP1	Prefoldin subunit 3	P61758	2	10	1.669	1.656	81.6	136.2	82.2
FLNB	Filamin-B	O75369	5	10	1.515	1.636	88.2	131.6	80.1
MAGT1	Magnesium transporter protein 1	Q9H0U3	5	9	13.723	8.458	20.2	251	28.8
EEF1E1	Eukaryotic translation elongation factor 1 epsilon-1	O43324	2	9	1.851	2.602	82.5	152.1	65.4
PAICS	Multifunctional protein ADE2	P22234	3	9	1.815	2.215	82.3	144.7	73
CACYBP	Calcyclin-binding protein	Q9HB71	4	9	2.326	1.929	73.3	152.7	74
PSPC1	Paraspeckle component 1	Q8WXF1	6	9	2.113	1.574	69.6	140.8	89.6
OAT	Ornithine aminotransferase, mitochondrial	P04181	4	9	3.337	1.546	59.1	142.3	98.7
C19orf43; TRIR	Telomerase RNA component interacting RNase	Q9BQ61	3	9	2.265	1.507	60.8	136.6	102.6
UCHL1	Ubiquitin carboxyl-terminal hydrolase isozyme L1	P09936	3	8	2.278	2.298	68.7	165.6	65.7
PSMA7	Proteasome subunit alpha type-7	O14818	4	7	19.456	9.305	16.5	252.2	31.3
ALYREF	THO complex subunit 4	Q86V81	3	7	5.248	3.891	65.8	96.6	137.6
YARS	Tyrosine--tRNA ligase, cytoplasmic	P54577	3	7	3.625	3.231	51.7	189.3	59
SLC3A2	4F2 cell-surface antigen heavy chain	P08195	2	7	2.777	2.337	68.7	147.4	83.9
GLO1	Lactoylglutathione lyase	Q04760	3	7	2.274	2.102	84.6	138.1	77.3
PCNP	PEST proteolytic signal-containing nuclear protein	Q8WW12	4	7	1.929	1.974	69.8	157.7	72.5
AKR1B1	Aldose reductase	P15121	3	7	2.061	1.695	77	139.3	83.7
FLYWCH2	FLYWCH family member 2	Q96CP2	2	7	1.983	1.659	71.3	142	86.7
ANXA1	Annexin A1	P04083	3	6	2.135	3.177	93.1	162.7	44.2
CHMP2B	Charged multivesicular body protein 2b	Q9UQN3	2	6	1.757	2.688	87.6	144.4	67.9
TMED2	Transmembrane emp24 domain-containing protein 2	Q15363	2	6	1.951	2.311	79.3	155.9	64.9
RUVBL1	RuvB-like 1	Q9Y265	2	6	2.588	1.771	61.7	143.4	94.9
CHID1	Chitinase domain-containing protein 1	Q9BWS9	3	6	2.84	1.768	71.4	147.9	80.7
FKBP1A	Peptidyl-prolyl cis-trans isomerase FKBP1A	P62942	2	5	14.559	37.455	18.8	273.9	7.3
CDK1	Cyclin-dependent kinase 1	P06493	3	5	2.695	5.409	48.6	202.4	49
PQBP1	Polyglutamine-binding protein 1	O60828	3	5	11.816	3.974	15.8	235.8	48.5
GTF2F1	General transcription factor IIF subunit 1	P35269	2	5	2.305	3.464	72.7	151	76.2
DNAJC9	DnaJ homolog subfamily C member 9	Q8WXX5	4	5	2.41	2.404	69.9	162.1	68
PCMT1	Protein-L-isoaspartate(D-aspartate) O-methyltransferase	P22061	2	5	1.912	2.119	79.4	150.7	69.9
CDK2	Cyclin-dependent kinase 2	P24941	2	5	1.523	1.946	90.8	138.2	71
SMC2	Structural maintenance of chromosomes protein 2	O95347	4	5	1.59	1.731	92.6	128.8	78.5
