# Supplementary material for: Cell-based HTS identifies a chemical chaperone for preventing ER protein aggregation and proteotoxicity
Source: eLife journal article supplement (doi:10.7554/elife.43302), 2019-12-16
Supplement: supp [file elife-43302-supp-v1.zip › elife_poa_e43302_Figure_5H_source_data_1.xlsx]

## Sheet: Figure 5H
GO-Term	P-value	GO-Term id	# Genes (observed)	# Genes (expected)	# Genes (total)	List of observed genes
extracellular exosome	1.44594e-51	GO:0070062	98	20.4214	2764	PARK7, NME1, SNRPB, TPI1, CHID1, HINT1, RUVBL1, EZR, PEBP1, TIMP1, CDK1, PFDN2, ANXA1, PSMA7, CACYBP, KRT10, PRCP, PPIA, JUP, FLG2, KPRP, AKR1B1, GSTP1, SBSN, KRT1, TKT, PPIB, TARS, AHCY, KRT2, S100A11, PSMB7, KRT6A, RPL27, MTHFD1, SMC2, SLC3A2, KRT17, DCD, YWHAE, GANAB, RAN, EIF2S3, CLU, MSN, CHMP2B, RPS27A, KRT78, HSP90AA1, ARHGDIA, PGK1, KRT9, GLO1, YWHAQ, KRT16, LDHB, ALYREF, VCL, ARF3, RPS25…
extracellular vesicle	2.2432e-51	GO:1903561	98	20.5174	2777	PARK7, NME1, SNRPB, TPI1, CHID1, HINT1, RUVBL1, EZR, PEBP1, TIMP1, CDK1, PFDN2, ANXA1, PSMA7, CACYBP, KRT10, PRCP, PPIA, JUP, FLG2, KPRP, AKR1B1, GSTP1, SBSN, KRT1, TKT, PPIB, TARS, AHCY, KRT2, S100A11, PSMB7, KRT6A, RPL27, MTHFD1, SMC2, SLC3A2, KRT17, DCD, YWHAE, GANAB, RAN, EIF2S3, CLU, MSN, CHMP2B, RPS27A, KRT78, HSP90AA1, ARHGDIA, PGK1, KRT9, GLO1, YWHAQ, KRT16, LDHB, ALYREF, VCL, ARF3, RPS25…
extracellular organelle	2.32006e-51	GO:0043230	98	20.5248	2778	PARK7, NME1, SNRPB, TPI1, CHID1, HINT1, RUVBL1, EZR, PEBP1, TIMP1, CDK1, PFDN2, ANXA1, PSMA7, CACYBP, KRT10, PRCP, PPIA, JUP, FLG2, KPRP, AKR1B1, GSTP1, SBSN, KRT1, TKT, PPIB, TARS, AHCY, KRT2, S100A11, PSMB7, KRT6A, RPL27, MTHFD1, SMC2, SLC3A2, KRT17, DCD, YWHAE, GANAB, RAN, EIF2S3, CLU, MSN, CHMP2B, RPS27A, KRT78, HSP90AA1, ARHGDIA, PGK1, KRT9, GLO1, YWHAQ, KRT16, LDHB, ALYREF, VCL, ARF3, RPS25…
extracellular region part	1.51049e-44	GO:0044421	103	27.8762	3773	PARK7, NME1, SNRPB, TPI1, CHID1, HINT1, RUVBL1, EZR, PEBP1, TIMP1, CDK1, PFDN2, HMGB1, ANXA1, PSMA7, CACYBP, KRT10, PRCP, PPIA, JUP, FLG2, KPRP, AKR1B1, YARS, GSTP1, SBSN, KRT1, TKT, PPIB, TARS, AHCY, KRT2, S100A11, PSMB7, KRT6A, RPL27, MTHFD1, SMC2, SLC3A2, KRT17, DCD, YWHAE, GANAB, RAN, EIF2S3, CLU, DNAJC9, MSN, CHMP2B, RPS27A, KRT78, HSP90AA1, ARHGDIA, PGK1, KRT9, GLO1, YWHAQ, KRT16, LDHB, ALY…
membrane-bounded vesicle	8.67805e-44	GO:0031988	100	26.1769	3543	PARK7, NME1, SNRPB, TPI1, CHID1, HINT1, RUVBL1, EZR, PEBP1, TIMP1, CDK1, PFDN2, ANXA1, PSMA7, CACYBP, KRT10, PRCP, PPIA, JUP, FLG2, KPRP, AKR1B1, GSTP1, SBSN, KRT1, TKT, PPIB, TARS, AHCY, KRT2, S100A11, PSMB7, KRT6A, RPL27, MTHFD1, SMC2, TMED2, SLC3A2, KRT17, DCD, YWHAE, GANAB, RAN, EIF2S3, CLU, MSN, CHMP2B, RPS27A, KRT78, HSP90AA1, ARHGDIA, PGK1, KRT9, GLO1, YWHAQ, KRT16, LDHB, ALYREF, VCL, ARF3…
vesicle	2.64329e-42	GO:0031982	100	27.1521	3675	PARK7, NME1, SNRPB, TPI1, CHID1, HINT1, RUVBL1, EZR, PEBP1, TIMP1, CDK1, PFDN2, ANXA1, PSMA7, CACYBP, KRT10, PRCP, PPIA, JUP, FLG2, KPRP, AKR1B1, GSTP1, SBSN, KRT1, TKT, PPIB, TARS, AHCY, KRT2, S100A11, PSMB7, KRT6A, RPL27, MTHFD1, SMC2, TMED2, SLC3A2, KRT17, DCD, YWHAE, GANAB, RAN, EIF2S3, CLU, MSN, CHMP2B, RPS27A, KRT78, HSP90AA1, ARHGDIA, PGK1, KRT9, GLO1, YWHAQ, KRT16, LDHB, ALYREF, VCL, ARF3…
extracellular region	3.38231e-37	GO:0005576	103	33.2697	4503	PARK7, NME1, SNRPB, TPI1, CHID1, HINT1, RUVBL1, EZR, PEBP1, TIMP1, CDK1, PFDN2, HMGB1, ANXA1, PSMA7, CACYBP, KRT10, PRCP, PPIA, JUP, FLG2, KPRP, AKR1B1, YARS, GSTP1, SBSN, KRT1, TKT, PPIB, TARS, AHCY, KRT2, S100A11, PSMB7, KRT6A, RPL27, MTHFD1, SMC2, SLC3A2, KRT17, DCD, YWHAE, GANAB, RAN, EIF2S3, CLU, DNAJC9, MSN, CHMP2B, RPS27A, KRT78, HSP90AA1, ARHGDIA, PGK1, KRT9, GLO1, YWHAQ, KRT16, LDHB, ALY…
cytosol	2.75259e-16	GO:0005829	67	25.2681	3420	PARK7, NME1, SNRPB, TPI1, EZR, PEBP1, CDK1, PSMA7, FHL1, PPIA, JUP, AKR1B1, YARS, GSTP1, TKT, TARS, AHCY, PSMB7, RPL27, MTHFD1, SMC2, YWHAE, EEF1D, RAN, EIF2S3, SART1, CLU, CHMP2B, RPS27A, HSP90AA1, ARHGDIA, PGK1, EIF4B, GLO1, YWHAQ, LDHB, ALYREF, VCL, RPS25, GGH, KRT14, PAICS, FKBP1A, PCMT1, UBA1, PRDX1, CDK2, EEF1E1, FLNB, KHSRP, ST13, KRT5, PHGDH, CCT7, PGAM1, GAPDH, HSP90B1, PRDX6, DSG1, PKM,…
membrane-bounded organelle	5.07248e-16	GO:0043227	126	87.9581	11905	PARK7, NME1, SNRPB, TPI1, CHID1, HINT1, RUVBL1, FUBP1, EZR, SF1, PEBP1, TIMP1, DHX15, CDK1, SSB, PFDN2, HMGB1, ANXA1, PSMA7, CACYBP, KRT10, STIP1, FHL1, PRCP, PPIA, JUP, FLG2, KPRP, AKR1B1, YARS, GSTP1, SBSN, KRT1, MAGT1, TKT, PPIB, GTF2F1, TARS, AHCY, KRT2, S100A11, PSMB7, KRT6A, RPL27, MTHFD1, SMC2, TMED2, SLC3A2, KRT17, DCD, YWHAE, GANAB, EEF1D, RAN, EIF2S3, SART1, CLU, DNAJC9, MSN, CHMP2B, RP…
organelle	1.66131e-15	GO:0043226	129	94.6002	12804	PARK7, NME1, SNRPB, TPI1, CHID1, HINT1, RUVBL1, FUBP1, EZR, SF1, PEBP1, TIMP1, DHX15, CDK1, SSB, PFDN2, HMGB1, ANXA1, PSMA7, CACYBP, KRT10, STIP1, FHL1, PRCP, PPIA, JUP, FLG2, KPRP, AKR1B1, YARS, GSTP1, SBSN, CNN3, KRT1, MAGT1, TKT, PPIB, GTF2F1, TARS, AHCY, KRT2, S100A11, PSMB7, KRT6A, RPL27, MTHFD1, SMC2, TMED2, SLC3A2, KRT17, DCD, YWHAE, GANAB, EEF1D, RAN, EIF2S3, SART1, CLU, DNAJC9, MSN, CHMP…
myelin sheath	1.11324e-13	GO:0043209	16	1.24124	168	NME1, EZR, STIP1, AKR1B1, TKT, MSN, HSP90AA1, LDHB, PRDX1, PHGDH, PGAM1, PKM, ENO1, HSPA5, UCHL1, CKB
pigment granule	6.52418e-13	GO:0048770	13	0.760999	103	PPIB, AHCY, SLC3A2, YWHAE, GANAB, RAN, HSP90AA1, GGH, PRDX1, PDIA4, CTSD, HSP90B1, HSPA5
melanosome	6.52418e-13	GO:0042470	13	0.760999	103	PPIB, AHCY, SLC3A2, YWHAE, GANAB, RAN, HSP90AA1, GGH, PRDX1, PDIA4, CTSD, HSP90B1, HSPA5
cytoplasm	1.04224e-12	GO:0005737	115	77.6662	10512	PARK7, NME1, SNRPB, TPI1, CHID1, HINT1, RUVBL1, EZR, SF1, PEBP1, TIMP1, DHX15, CDK1, PFDN2, HMGB1, ANXA1, PSMA7, CACYBP, KRT10, STIP1, FHL1, PRCP, PPIA, JUP, FLG2, KPRP, AKR1B1, YARS, GSTP1, CNN3, PFDN6, MAGT1, TKT, PPIB, TARS, AHCY, KRT2, S100A11, PSMB7, RPL27, MTHFD1, SMC2, TMED2, SLC3A2, KRT17, YWHAE, GANAB, EEF1D, RAN, EIF2S3, SART1, CLU, DNAJC9, MSN, CHMP2B, RPS27A, HSP90AA1, ARHGDIA, PDLIM1…
intermediate filament	1.22964e-12	GO:0005882	16	1.44811	196	NME1, KRT10, JUP, KRT1, KRT2, KRT6A, KRT17, KRT78, KRT9, KRT16, KRT14, KRT5, KRT6B, PKP1, KRT77, DSP
intracellular part	1.5348e-11	GO:0044424	128	100.016	13537	PARK7, NME1, SNRPB, TPI1, CHID1, HINT1, RUVBL1, FUBP1, EZR, SF1, PEBP1, TIMP1, DHX15, CDK1, SSB, PFDN2, HMGB1, ANXA1, PSMA7, CACYBP, KRT10, STIP1, FHL1, PRCP, PPIA, JUP, FLG2, KPRP, AKR1B1, YARS, GSTP1, CNN3, PFDN6, KRT1, MAGT1, TKT, PPIB, GTF2F1, TARS, AHCY, KRT2, S100A11, PSMB7, KRT6A, RPL27, MTHFD1, SMC2, TMED2, SLC3A2, KRT17, YWHAE, GANAB, EEF1D, RAN, EIF2S3, SART1, CLU, DNAJC9, MSN, CHMP2B, …
intermediate filament cytoskeleton	2.52953e-11	GO:0045111	16	1.76581	239	NME1, KRT10, JUP, KRT1, KRT2, KRT6A, KRT17, KRT78, KRT9, KRT16, KRT14, KRT5, KRT6B, PKP1, KRT77, DSP
cytoplasmic part	2.91234e-11	GO:0044444	96	58.4713	7914	PARK7, NME1, SNRPB, TPI1, CHID1, RUVBL1, EZR, SF1, PEBP1, TIMP1, CDK1, PFDN2, HMGB1, ANXA1, PSMA7, CACYBP, STIP1, FHL1, PRCP, PPIA, JUP, AKR1B1, YARS, GSTP1, MAGT1, TKT, PPIB, TARS, AHCY, KRT2, PSMB7, RPL27, MTHFD1, SMC2, TMED2, SLC3A2, YWHAE, GANAB, EEF1D, RAN, EIF2S3, SART1, CLU, MSN, CHMP2B, RPS27A, HSP90AA1, ARHGDIA, PGK1, EIF4B, GLO1, YWHAQ, LDHB, ALYREF, VCL, ARF3, RPS25, GGH, PQBP1, KRT14,…
anchoring junction	7.42901e-11	GO:0070161	21	3.6129	489	EZR, ANXA1, FHL1, PPIA, JUP, CNN3, PPIB, RPL27, YWHAE, MSN, PDLIM1, YWHAQ, VCL, UBA1, HYOU1, FLNB, HSP90B1, DSG1, HSPA5, PKP1, DSP
intracellular	2.83271e-10	GO:0005622	128	102.565	13882	PARK7, NME1, SNRPB, TPI1, CHID1, HINT1, RUVBL1, FUBP1, EZR, SF1, PEBP1, TIMP1, DHX15, CDK1, SSB, PFDN2, HMGB1, ANXA1, PSMA7, CACYBP, KRT10, STIP1, FHL1, PRCP, PPIA, JUP, FLG2, KPRP, AKR1B1, YARS, GSTP1, CNN3, PFDN6, KRT1, MAGT1, TKT, PPIB, GTF2F1, TARS, AHCY, KRT2, S100A11, PSMB7, KRT6A, RPL27, MTHFD1, SMC2, TMED2, SLC3A2, KRT17, YWHAE, GANAB, EEF1D, RAN, EIF2S3, SART1, CLU, DNAJC9, MSN, CHMP2B, …
focal adhesion	4.64001e-09	GO:0005925	17	2.88884	391	EZR, ANXA1, FHL1, PPIA, JUP, CNN3, PPIB, RPL27, YWHAE, MSN, PDLIM1, YWHAQ, VCL, HYOU1, FLNB, HSP90B1, HSPA5
cell-substrate adherens junction	5.20099e-09	GO:0005924	17	2.911	394	EZR, ANXA1, FHL1, PPIA, JUP, CNN3, PPIB, RPL27, YWHAE, MSN, PDLIM1, YWHAQ, VCL, HYOU1, FLNB, HSP90B1, HSPA5
cell-substrate junction	6.04619e-09	GO:0030055	17	2.94056	398	EZR, ANXA1, FHL1, PPIA, JUP, CNN3, PPIB, RPL27, YWHAE, MSN, PDLIM1, YWHAQ, VCL, HYOU1, FLNB, HSP90B1, HSPA5
adherens junction	1.10526e-08	GO:0005912	18	3.46513	469	EZR, ANXA1, FHL1, PPIA, JUP, CNN3, PPIB, RPL27, YWHAE, MSN, PDLIM1, YWHAQ, VCL, HYOU1, FLNB, HSP90B1, HSPA5, DSP
intracellular organelle	2.15542e-08	GO:0043229	115	86.9312	11766	PARK7, NME1, SNRPB, TPI1, CHID1, HINT1, RUVBL1, FUBP1, EZR, SF1, PEBP1, TIMP1, DHX15, CDK1, SSB, PFDN2, HMGB1, ANXA1, PSMA7, CACYBP, KRT10, STIP1, FHL1, PRCP, PPIA, JUP, FLG2, AKR1B1, YARS, GSTP1, CNN3, KRT1, MAGT1, TKT, PPIB, GTF2F1, TARS, AHCY, KRT2, S100A11, PSMB7, KRT6A, RPL27, MTHFD1, SMC2, TMED2, SLC3A2, KRT17, YWHAE, GANAB, EEF1D, RAN, EIF2S3, SART1, CLU, DNAJC9, MSN, CHMP2B, RPS27A, KRT78…
nucleus	2.94709e-08	GO:0005634	82	50.7726	6872	PARK7, NME1, SNRPB, TPI1, CHID1, HINT1, RUVBL1, FUBP1, EZR, SF1, PEBP1, DHX15, CDK1, SSB, PFDN2, HMGB1, ANXA1, PSMA7, CACYBP, KRT10, STIP1, FHL1, PPIA, JUP, FLG2, AKR1B1, YARS, GSTP1, KRT1, TKT, PPIB, GTF2F1, AHCY, KRT2, S100A11, PSMB7, RPL27, SMC2, SLC3A2, EEF1D, RAN, EIF2S3, SART1, CLU, DNAJC9, MSN, CHMP2B, RPS27A, HSP90AA1, KRT9, KRT16, ALYREF, RPS25, GGH, PQBP1, SUMO2, KRT14, DNAJC8, HRNR, UB…
polymeric cytoskeletal fiber	8.94067e-08	GO:0099513	20	4.90585	664	NME1, EZR, CDK1, KRT10, JUP, KRT1, KRT2, KRT6A, KRT17, KRT78, KRT9, KRT16, KRT14, KRT5, KRT6B, CCT7, TUBB2A, PKP1, KRT77, DSP
supramolecular fiber	8.94067e-08	GO:0099512	20	4.90585	664	NME1, EZR, CDK1, KRT10, JUP, KRT1, KRT2, KRT6A, KRT17, KRT78, KRT9, KRT16, KRT14, KRT5, KRT6B, CCT7, TUBB2A, PKP1, KRT77, DSP
non-membrane-bounded organelle	3.3418e-07	GO:0043228	54	28.3417	3836	PARK7, NME1, HINT1, RUVBL1, EZR, SF1, DHX15, CDK1, SSB, PFDN2, HMGB1, KRT10, JUP, CNN3, KRT1, TARS, KRT2, KRT6A, RPL27, SMC2, KRT17, YWHAE, EEF1D, RAN, MSN, RPS27A, KRT78, ARHGDIA, PDLIM1, KRT9, KRT16, ALYREF, VCL, RPS25, PQBP1, KRT14, FKBP1A, UBA1, CDK2, FLNB, KHSRP, PSPC1, KRT5, KRT6B, CCT7, GAPDH, HMGB2, ENO1, TMPO, TUBB2A, PKP1, EEF2, KRT77, DSP
intracellular non-membrane-bounded organelle	3.3418e-07	GO:0043232	54	28.3417	3836	PARK7, NME1, HINT1, RUVBL1, EZR, SF1, DHX15, CDK1, SSB, PFDN2, HMGB1, KRT10, JUP, CNN3, KRT1, TARS, KRT2, KRT6A, RPL27, SMC2, KRT17, YWHAE, EEF1D, RAN, MSN, RPS27A, KRT78, ARHGDIA, PDLIM1, KRT9, KRT16, ALYREF, VCL, RPS25, PQBP1, KRT14, FKBP1A, UBA1, CDK2, FLNB, KHSRP, PSPC1, KRT5, KRT6B, CCT7, GAPDH, HMGB2, ENO1, TMPO, TUBB2A, PKP1, EEF2, KRT77, DSP
keratin filament	4.68532e-07	GO:0045095	8	0.694504	94	KRT1, KRT2, KRT6A, KRT78, KRT14, KRT5, KRT6B, KRT77
extracellular space	5.82114e-07	GO:0005615	28	10.0629	1362	TPI1, CHID1, EZR, TIMP1, HMGB1, ANXA1, KRT10, PPIA, AKR1B1, YARS, GSTP1, KRT1, KRT2, S100A11, CLU, DNAJC9, MSN, RPS27A, KRT78, KRT9, GGH, PRDX1, CTSZ, CTSD, PRDX6, HMGB2, ENO1, CKB
desmosome	7.74707e-07	GO:0030057	5	0.17732	24	JUP, UBA1, DSG1, PKP1, DSP
endoplasmic reticulum chaperone complex	9.02463e-07	GO:0034663	4	0.0812717	11	PPIB, HYOU1, HSP90B1, HSPA5
cytoskeleton	2.1027e-06	GO:0005856	34	14.725	1993	NME1, HINT1, RUVBL1, EZR, CDK1, KRT10, JUP, CNN3, KRT1, TARS, KRT2, KRT6A, KRT17, YWHAE, RAN, MSN, KRT78, ARHGDIA, PDLIM1, KRT9, KRT16, VCL, PQBP1, KRT14, CDK2, FLNB, KRT5, KRT6B, CCT7, GAPDH, TUBB2A, PKP1, KRT77, DSP
intracellular membrane-bounded organelle	3.90883e-06	GO:0043231	104	79.4098	10748	PARK7, NME1, SNRPB, TPI1, CHID1, HINT1, RUVBL1, FUBP1, EZR, SF1, PEBP1, TIMP1, DHX15, CDK1, SSB, PFDN2, HMGB1, ANXA1, PSMA7, CACYBP, KRT10, STIP1, FHL1, PRCP, PPIA, JUP, FLG2, AKR1B1, YARS, GSTP1, KRT1, MAGT1, TKT, PPIB, GTF2F1, AHCY, KRT2, S100A11, PSMB7, RPL27, MTHFD1, SMC2, TMED2, SLC3A2, YWHAE, GANAB, EEF1D, RAN, EIF2S3, SART1, CLU, DNAJC9, MSN, CHMP2B, RPS27A, HSP90AA1, KRT9, YWHAQ, KRT16, L…
cell junction	1.12153e-05	GO:0030054	23	8.50397	1151	EZR, ANXA1, FHL1, PPIA, JUP, AKR1B1, CNN3, PPIB, GTF2F1, RPL27, YWHAE, MSN, PDLIM1, YWHAQ, VCL, UBA1, HYOU1, FLNB, HSP90B1, DSG1, HSPA5, PKP1, DSP
prefoldin complex	1.35022e-05	GO:0016272	3	0.0517183	7	PFDN2, PFDN6, VBP1
cytoskeletal part	2.3738e-05	GO:0044430	26	10.8609	1470	NME1, RUVBL1, EZR, CDK1, KRT10, JUP, KRT1, KRT2, KRT6A, KRT17, YWHAE, RAN, KRT78, KRT9, KRT16, PQBP1, KRT14, CDK2, FLNB, KRT5, KRT6B, CCT7, TUBB2A, PKP1, KRT77, DSP
cytoplasmic, membrane-bounded vesicle	3.57478e-05	GO:0016023	22	8.51136	1152	TIMP1, ANXA1, PPIB, AHCY, TMED2, SLC3A2, YWHAE, GANAB, RAN, CLU, RPS27A, HSP90AA1, YWHAQ, GGH, PRDX1, HYOU1, CTSZ, PDIA4, CTSD, HSP90B1, PRDX6, HSPA5
fascia adherens	4.55427e-05	GO:0005916	3	0.0738834	10	JUP, VCL, DSP
cytoplasmic vesicle	0.000122176	GO:0031410	22	9.2502	1252	TIMP1, ANXA1, PPIB, AHCY, TMED2, SLC3A2, YWHAE, GANAB, RAN, CLU, RPS27A, HSP90AA1, YWHAQ, GGH, PRDX1, HYOU1, CTSZ, PDIA4, CTSD, HSP90B1, PRDX6, HSPA5
intracellular vesicle	0.000125021	GO:0097708	22	9.26497	1254	TIMP1, ANXA1, PPIB, AHCY, TMED2, SLC3A2, YWHAE, GANAB, RAN, CLU, RPS27A, HSP90AA1, YWHAQ, GGH, PRDX1, HYOU1, CTSZ, PDIA4, CTSD, HSP90B1, PRDX6, HSPA5
Schwann cell microvillus	0.000161348	GO:0097454	2	0.022165	3	EZR, AKR1B1
macromolecular complex	0.000184945	GO:0032991	53	33.9125	4590	PARK7, SNRPB, HINT1, RUVBL1, EZR, SF1, DHX15, SSB, PFDN2, HMGB1, ANXA1, PSMA7, CACYBP, STIP1, JUP, GSTP1, PFDN6, MAGT1, PPIB, GTF2F1, PSMB7, RPL27, SMC2, YWHAE, GANAB, EEF1D, RAN, SART1, CLU, CHMP2B, RPS27A, HSP90AA1, PDLIM1, EIF4B, YWHAQ, ALYREF, VCL, RPS25, PQBP1, UBA1, CDK2, HYOU1, KHSRP, ST13, CCT7, GAPDH, HSP90B1, HMGB2, VBP1, ENO1, HSPA5, TMPO, EEF2
organelle part	0.000209657	GO:0044422	81	60.3701	8171	PARK7, NME1, SNRPB, CHID1, HINT1, RUVBL1, FUBP1, EZR, SF1, TIMP1, DHX15, CDK1, SSB, PFDN2, HMGB1, ANXA1, PSMA7, CACYBP, KRT10, JUP, AKR1B1, KRT1, MAGT1, TKT, PPIB, GTF2F1, KRT2, PSMB7, KRT6A, RPL27, SMC2, TMED2, KRT17, YWHAE, GANAB, EEF1D, RAN, SART1, CLU, CHMP2B, RPS27A, KRT78, HSP90AA1, KRT9, YWHAQ, KRT16, ALYREF, VCL, ARF3, RPS25, PQBP1, SUMO2, KRT14, ZFYVE27, DNAJC8, FKBP1A, UBA1, PLS3, CDK2,…
endocytic vesicle lumen	0.000248504	GO:0071682	3	0.125602	17	HSP90AA1, HYOU1, HSP90B1
ribonucleoprotein complex	0.000302552	GO:1990904	15	5.35654	725	SNRPB, SF1, DHX15, SSB, RPL27, SART1, RPS27A, EIF4B, ALYREF, RPS25, PQBP1, KHSRP, GAPDH, VBP1, EEF2
intracellular ribonucleoprotein complex	0.000302552	GO:0030529	15	5.35654	725	SNRPB, SF1, DHX15, SSB, RPL27, SART1, RPS27A, EIF4B, ALYREF, RPS25, PQBP1, KHSRP, GAPDH, VBP1, EEF2
intracellular organelle part	0.00060457	GO:0044446	78	59.0254	7989	PARK7, NME1, SNRPB, CHID1, HINT1, RUVBL1, FUBP1, EZR, SF1, TIMP1, DHX15, CDK1, SSB, PFDN2, HMGB1, ANXA1, PSMA7, CACYBP, KRT10, JUP, AKR1B1, KRT1, MAGT1, TKT, PPIB, GTF2F1, KRT2, PSMB7, KRT6A, RPL27, SMC2, TMED2, KRT17, YWHAE, GANAB, EEF1D, RAN, SART1, CLU, CHMP2B, RPS27A, KRT78, HSP90AA1, KRT9, YWHAQ, KRT16, ALYREF, ARF3, RPS25, PQBP1, SUMO2, KRT14, ZFYVE27, DNAJC8, FKBP1A, UBA1, CDK2, HYOU1, CTS…
endoplasmic reticulum lumen	0.000718834	GO:0005788	7	1.47767	200	PPIB, GANAB, HYOU1, CTSZ, PDIA4, HSP90B1, HSPA5
cytoplasmic membrane-bounded vesicle lumen	0.00104566	GO:0060205	5	0.768387	104	TIMP1, CLU, HSP90AA1, HYOU1, HSP90B1
vesicle lumen	0.00113886	GO:0031983	5	0.783164	106	TIMP1, CLU, HSP90AA1, HYOU1, HSP90B1
cell part	0.00134174	GO:0044464	128	118.199	15998	PARK7, NME1, SNRPB, TPI1, CHID1, HINT1, RUVBL1, FUBP1, EZR, SF1, PEBP1, TIMP1, DHX15, CDK1, SSB, PFDN2, HMGB1, ANXA1, PSMA7, CACYBP, KRT10, STIP1, FHL1, PRCP, PPIA, JUP, FLG2, KPRP, AKR1B1, YARS, GSTP1, CNN3, PFDN6, KRT1, MAGT1, TKT, PPIB, GTF2F1, TARS, AHCY, KRT2, S100A11, PSMB7, KRT6A, RPL27, MTHFD1, SMC2, TMED2, SLC3A2, KRT17, YWHAE, GANAB, EEF1D, RAN, EIF2S3, SART1, CLU, DNAJC9, MSN, CHMP2B, …
cell	0.00157928	GO:0005623	128	118.398	16025	PARK7, NME1, SNRPB, TPI1, CHID1, HINT1, RUVBL1, FUBP1, EZR, SF1, PEBP1, TIMP1, DHX15, CDK1, SSB, PFDN2, HMGB1, ANXA1, PSMA7, CACYBP, KRT10, STIP1, FHL1, PRCP, PPIA, JUP, FLG2, KPRP, AKR1B1, YARS, GSTP1, CNN3, PFDN6, KRT1, MAGT1, TKT, PPIB, GTF2F1, TARS, AHCY, KRT2, S100A11, PSMB7, KRT6A, RPL27, MTHFD1, SMC2, TMED2, SLC3A2, KRT17, YWHAE, GANAB, EEF1D, RAN, EIF2S3, SART1, CLU, DNAJC9, MSN, CHMP2B, …
smooth endoplasmic reticulum	0.00167164	GO:0005790	3	0.236427	32	PPIB, HYOU1, HSPA5
lysosome	0.00179205	GO:0005764	11	3.87888	525	CHID1, ANXA1, PRCP, AKR1B1, CHMP2B, HSP90AA1, GGH, UBA1, CTSZ, CTSD, PRDX6
lytic vacuole	0.00179205	GO:0000323	11	3.87888	525	CHID1, ANXA1, PRCP, AKR1B1, CHMP2B, HSP90AA1, GGH, UBA1, CTSZ, CTSD, PRDX6
organelle lumen	0.00185661	GO:0043233	47	31.7551	4298	PARK7, SNRPB, HINT1, RUVBL1, FUBP1, EZR, SF1, TIMP1, DHX15, CDK1, SSB, PFDN2, HMGB1, ANXA1, PSMA7, CACYBP, AKR1B1, TKT, PPIB, GTF2F1, PSMB7, SMC2, GANAB, EEF1D, RAN, SART1, CLU, RPS27A, HSP90AA1, ALYREF, RPS25, PQBP1, SUMO2, DNAJC8, CDK2, HYOU1, CTSZ, OAT, KHSRP, PDIA4, PSPC1, CTSD, HSP90B1, HMGB2, HSPA5, PKP1, UCHL1
membrane-enclosed lumen	0.00244006	GO:0031974	47	32.1614	4353	PARK7, SNRPB, HINT1, RUVBL1, FUBP1, EZR, SF1, TIMP1, DHX15, CDK1, SSB, PFDN2, HMGB1, ANXA1, PSMA7, CACYBP, AKR1B1, TKT, PPIB, GTF2F1, PSMB7, SMC2, GANAB, EEF1D, RAN, SART1, CLU, RPS27A, HSP90AA1, ALYREF, RPS25, PQBP1, SUMO2, DNAJC8, CDK2, HYOU1, CTSZ, OAT, KHSRP, PDIA4, PSPC1, CTSD, HSP90B1, HMGB2, HSPA5, PKP1, UCHL1
perinuclear region of cytoplasm	0.00266933	GO:0048471	12	4.69898	636	NME1, EZR, AKR1B1, PPIB, CLU, MSN, HSP90AA1, ARF3, HRNR, GAPDH, HSP90B1, HMGB2
ruffle membrane	0.00291854	GO:0032587	4	0.591067	80	NME1, EZR, HSP90AA1, ARF4
uropod	0.00340636	GO:0001931	2	0.08866	12	EZR, MSN
cell trailing edge	0.00340636	GO:0031254	2	0.08866	12	EZR, MSN
polysome	0.00342331	GO:0005844	3	0.302922	41	EIF4B, VBP1, EEF2
intracellular organelle lumen	0.00414869	GO:0070013	45	31.2083	4224	PARK7, SNRPB, HINT1, RUVBL1, FUBP1, EZR, SF1, DHX15, CDK1, SSB, PFDN2, HMGB1, ANXA1, PSMA7, CACYBP, AKR1B1, TKT, PPIB, GTF2F1, PSMB7, SMC2, GANAB, EEF1D, RAN, SART1, RPS27A, HSP90AA1, ALYREF, RPS25, PQBP1, SUMO2, DNAJC8, CDK2, HYOU1, CTSZ, OAT, KHSRP, PDIA4, PSPC1, CTSD, HSP90B1, HMGB2, HSPA5, PKP1, UCHL1
cornified envelope	0.00474593	GO:0001533	3	0.339863	46	ANXA1, HRNR, DSP
endoplasmic reticulum subcompartment	0.00534117	GO:0098827	2	0.110825	15	ZFYVE27, FKBP1A
glial cell projection	0.00534117	GO:0097386	2	0.110825	15	EZR, AKR1B1
lateral plasma membrane	0.00566838	GO:0016328	3	0.362028	49	ANXA1, JUP, DSG1
intercalated disc	0.00566838	GO:0014704	3	0.362028	49	JUP, VCL, DSP
ruffle	0.00589669	GO:0001726	5	1.14519	155	NME1, EZR, S100A11, HSP90AA1, ARF4
vacuole	0.0061092	GO:0005773	17	8.71085	1179	CHID1, EZR, HMGB1, ANXA1, PRCP, AKR1B1, RAN, CHMP2B, RPS27A, HSP90AA1, GGH, ZFYVE27, UBA1, CDK2, CTSZ, CTSD, PRDX6
cell projection cytoplasm	0.00669114	GO:0032838	3	0.384193	52	AKR1B1, PQBP1, UCHL1
endoplasmic reticulum-Golgi intermediate compartment	0.00741047	GO:0005793	4	0.768387	104	HMGB1, TMED2, CTSZ, HSPA5
cell-cell adherens junction	0.00743	GO:0005913	3	0.39897	54	JUP, VCL, DSP
protein complex	0.00806907	GO:0043234	41	28.7406	3890	PARK7, SNRPB, HINT1, RUVBL1, EZR, PFDN2, HMGB1, ANXA1, PSMA7, CACYBP, STIP1, JUP, GSTP1, PFDN6, MAGT1, PPIB, GTF2F1, PSMB7, SMC2, YWHAE, GANAB, EEF1D, RAN, CLU, CHMP2B, HSP90AA1, PDLIM1, EIF4B, YWHAQ, ALYREF, VCL, CDK2, HYOU1, ST13, CCT7, GAPDH, HSP90B1, HMGB2, VBP1, ENO1, HSPA5
microvillus membrane	0.00853215	GO:0031528	2	0.140378	19	EZR, MSN
spliceosomal complex	0.00883534	GO:0005681	5	1.26341	171	SNRPB, SF1, DHX15, SART1, ALYREF
proteasome core complex	0.00943458	GO:0005839	2	0.147767	20	PSMA7, PSMB7
