# Supplementary material for: Cell-based HTS identifies a chemical chaperone for preventing ER protein aggregation and proteotoxicity
Source: eLife journal article supplement (doi:10.7554/elife.43302), 2019-12-16
Supplement: supp [file elife-43302-supp-v1.zip › elife_poa_e43302_Figure_5I_source_data_1.xlsx]

## Sheet: Figure 5I
GO-Term	P-value	GO-Term id	# Genes (observed)	# Genes (expected)	# Genes (total)	List of observed genes
protein folding	1.83411e-09	GO:0006457	14	1.717	221	PFDN2, PPIA, PFDN6, PPIB, GANAB, CLU, HSP90AA1, FKBP1A, ST13, PDIA4, CCT7, HSP90B1, VBP1, HSPA5
intermediate filament cytoskeleton organization	3.7038e-08	GO:0045104	7	0.334076	43	KRT6A, KRT17, KRT9, KRT16, KRT14, PKP1, DSP
NADH regeneration	3.9653e-08	GO:0006735	6	0.202	26	TPI1, PGK1, PGAM1, GAPDH, PKM, ENO1
canonical glycolysis	3.9653e-08	GO:0061621	6	0.202	26	TPI1, PGK1, PGAM1, GAPDH, PKM, ENO1
glucose catabolic process to pyruvate	3.9653e-08	GO:0061718	6	0.202	26	TPI1, PGK1, PGAM1, GAPDH, PKM, ENO1
intermediate filament-based process	4.37623e-08	GO:0045103	7	0.341845	44	KRT6A, KRT17, KRT9, KRT16, KRT14, PKP1, DSP
glycolytic process through glucose-6-phosphate	5.06591e-08	GO:0061620	6	0.209769	27	TPI1, PGK1, PGAM1, GAPDH, PKM, ENO1
glycolytic process through fructose-6-phosphate	5.06591e-08	GO:0061615	6	0.209769	27	TPI1, PGK1, PGAM1, GAPDH, PKM, ENO1
catabolic process	6.83352e-08	GO:0009056	37	14.7149	1894	PARK7, CHID1, TPI1, EZR, HINT1, TIMP1, PSMA7, CDK1, HMGB1, PSMB7, AHCY, RPL27, RPS27A, CLU, MSN, PGK1, EIF4B, SUMO2, RPS25, UBA1, PRDX1, CTSZ, KHSRP, OAT, PGAM1, CTSD, HSP90B1, PCNP, GAPDH, HMGB2, PRDX6, PKM, HSPA5, ENO1, UCHL1, DTD1, PRDX2
organonitrogen compound metabolic process	7.54647e-08	GO:1901564	40	16.8126	2164	PARK7, CHID1, NME1, TPI1, HINT1, PSMA7, SSB, YARS, GSTP1, AKR1B1, TKT, PSMB7, TARS, AHCY, RPL27, MTHFD1, KRT17, EEF1D, RPS27A, EIF2S3, RAN, CLU, PGK1, EIF4B, GLO1, LDHB, PAICS, RPS25, GGH, CTSZ, EEF1E1, OAT, PGAM1, PHGDH, GAPDH, PKM, ENO1, EEF2, DTD1, CKB
glucose catabolic process	1.22841e-07	GO:0006007	6	0.240846	31	TPI1, PGK1, PGAM1, GAPDH, PKM, ENO1
organic substance catabolic process	1.80715e-07	GO:1901575	35	13.938	1794	PARK7, CHID1, TPI1, EZR, HINT1, TIMP1, PSMA7, CDK1, HMGB1, PSMB7, AHCY, RPL27, RPS27A, CLU, MSN, PGK1, EIF4B, SUMO2, RPS25, UBA1, CTSZ, KHSRP, OAT, PGAM1, CTSD, HSP90B1, PCNP, GAPDH, HMGB2, PRDX6, PKM, HSPA5, ENO1, UCHL1, DTD1
NAD metabolic process	2.77678e-07	GO:0019674	7	0.442845	57	TPI1, PGK1, LDHB, PGAM1, GAPDH, PKM, ENO1
NADH metabolic process	3.14799e-07	GO:0006734	6	0.279692	36	TPI1, PGK1, PGAM1, GAPDH, PKM, ENO1
intermediate filament organization	3.69726e-07	GO:0045109	5	0.155384	20	KRT17, KRT9, KRT14, PKP1, DSP
skin development	3.71779e-07	GO:0043588	12	1.86461	240	ANXA1, KRT10, JUP, FLG2, KRT1, KRT2, KRT17, KRT9, KRT16, HRNR, FLNB, DSP
cellular catabolic process	4.09965e-07	GO:0044248	31	11.7859	1517	PARK7, TPI1, EZR, HINT1, TIMP1, PSMA7, CDK1, HMGB1, PSMB7, AHCY, RPL27, RPS27A, CLU, MSN, EIF4B, SUMO2, RPS25, UBA1, PRDX1, CTSZ, KHSRP, OAT, PGAM1, HSP90B1, PCNP, HMGB2, PRDX6, HSPA5, UCHL1, DTD1, PRDX2
pyruvate metabolic process	1.17737e-06	GO:0006090	8	0.78469	101	TPI1, PGK1, GLO1, LDHB, PGAM1, GAPDH, PKM, ENO1
epithelium development	1.44051e-06	GO:0060429	24	8.11106	1044	EZR, PSMA7, CDK1, ANXA1, KRT10, CNN3, KRT2, PSMB7, MTHFD1, KRT17, TMED2, RPS27A, MSN, PGK1, KRT16, VCL, KRT14, HRNR, PLS3, TAGLN2, CTSZ, FLNB, PHGDH, DSP
hexose catabolic process	2.646e-06	GO:0019320	6	0.39623	51	TPI1, PGK1, PGAM1, GAPDH, PKM, ENO1
epidermis development	3.13976e-06	GO:0008544	12	2.28415	294	ANXA1, KRT10, KRT2, KRT17, KRT9, KRT16, KRT14, HRNR, PLS3, KRT5, FLNB, DSP
nucleoside diphosphate phosphorylation	4.33002e-06	GO:0006165	7	0.660383	85	NME1, TPI1, PGK1, PGAM1, GAPDH, PKM, ENO1
chaperone-mediated protein complex assembly	4.44197e-06	GO:0051131	4	0.116538	15	PFDN6, CLU, HSP90AA1, HSPA4
monosaccharide biosynthetic process	5.06069e-06	GO:0046364	7	0.675921	87	TPI1, AKR1B1, TKT, PGK1, PGAM1, GAPDH, ENO1
monosaccharide catabolic process	5.1322e-06	GO:0046365	6	0.442845	57	TPI1, PGK1, PGAM1, GAPDH, PKM, ENO1
pyridine nucleotide metabolic process	5.20261e-06	GO:0019362	8	0.955613	123	TPI1, TKT, PGK1, LDHB, PGAM1, GAPDH, PKM, ENO1
nicotinamide nucleotide metabolic process	5.20261e-06	GO:0046496	8	0.955613	123	TPI1, TKT, PGK1, LDHB, PGAM1, GAPDH, PKM, ENO1
keratinocyte differentiation	5.86519e-06	GO:0030216	8	0.971152	125	ANXA1, KRT10, KRT2, KRT17, KRT16, HRNR, FLNB, DSP
epithelial cell differentiation	5.93208e-06	GO:0030855	16	4.28861	552	EZR, CDK1, ANXA1, KRT10, CNN3, KRT2, KRT17, MSN, PGK1, KRT16, KRT14, HRNR, PLS3, TAGLN2, FLNB, DSP
nucleotide phosphorylation	6.34713e-06	GO:0046939	7	0.699229	90	NME1, TPI1, PGK1, PGAM1, GAPDH, PKM, ENO1
tissue development	6.38983e-06	GO:0009888	31	13.4174	1727	EZR, TIMP1, PSMA7, CDK1, ANXA1, KRT10, CNN3, KRT2, PSMB7, MTHFD1, KRT17, TMED2, RPS27A, MSN, KRT9, PGK1, KRT16, VCL, FKBP1A, KRT14, HRNR, PLS3, TAGLN2, CTSZ, KRT5, FLNB, KRT6B, PHGDH, PKM, EEF2, DSP
animal organ development	6.66316e-06	GO:0048513	45	23.8204	3066	NME1, EZR, TIMP1, SF1, PSMA7, CDK1, HMGB1, ANXA1, KRT10, FHL1, GSTP1, JUP, FLG2, AKR1B1, KRT1, PPIB, KRT2, PSMB7, MTHFD1, KRT17, TMED2, YWHAE, RPS27A, RAN, CLU, MSN, SART1, KRT9, GLO1, KRT16, YWHAQ, FKBP1A, HRNR, PLS3, CDK2, CTSZ, FLNB, PHGDH, HMGB2, PKM, HSPA5, ARF4, EEF2, DSP, CKB
response to reactive oxygen species	7.5032e-06	GO:0000302	10	1.68592	217	PARK7, CDK1, ANXA1, GSTP1, AKR1B1, PRDX1, CDK2, PRDX6, EEF2, PRDX2
macromolecule catabolic process	7.62989e-06	GO:0009057	24	8.93459	1150	PARK7, CHID1, EZR, TIMP1, PSMA7, CDK1, HMGB1, PSMB7, RPL27, RPS27A, CLU, MSN, EIF4B, SUMO2, RPS25, UBA1, CTSZ, KHSRP, CTSD, HSP90B1, PCNP, HMGB2, HSPA5, UCHL1
establishment of skin barrier	7.65215e-06	GO:0061436	4	0.132077	17	FLG2, KRT1, KRT16, HRNR
cellular macromolecule catabolic process	8.17466e-06	GO:0044265	21	7.15544	921	PARK7, EZR, PSMA7, CDK1, HMGB1, PSMB7, RPL27, RPS27A, CLU, MSN, EIF4B, SUMO2, RPS25, UBA1, CTSZ, KHSRP, HSP90B1, PCNP, HMGB2, HSPA5, UCHL1
pyridine-containing compound metabolic process	8.29722e-06	GO:0072524	8	1.01777	131	TPI1, TKT, PGK1, LDHB, PGAM1, GAPDH, PKM, ENO1
epidermal cell differentiation	9.05825e-06	GO:0009913	9	1.35961	175	ANXA1, KRT10, KRT2, KRT17, KRT16, HRNR, PLS3, FLNB, DSP
carboxylic acid metabolic process	9.1786e-06	GO:0019752	20	6.62714	853	PARK7, TPI1, PSMA7, ANXA1, YARS, PSMB7, TARS, MTHFD1, PGK1, GLO1, LDHB, GGH, EEF1E1, OAT, PGAM1, PHGDH, GAPDH, PKM, ENO1, DTD1
oxoacid metabolic process	1.00006e-05	GO:0043436	20	6.66598	858	PARK7, TPI1, PSMA7, ANXA1, YARS, PSMB7, TARS, MTHFD1, PGK1, GLO1, LDHB, GGH, EEF1E1, OAT, PGAM1, PHGDH, GAPDH, PKM, ENO1, DTD1
protein localization to organelle	1.01728e-05	GO:0033365	20	6.67375	859	PARK7, EZR, RUVBL1, CDK1, SSB, JUP, PSMB7, RPL27, YWHAE, RPS27A, RAN, MSN, HSP90AA1, YWHAQ, RPS25, PRDX1, CCT7, HSPA5, ARF4, HSPA4
oxidoreduction coenzyme metabolic process	1.09284e-05	GO:0006733	8	1.05661	136	TPI1, TKT, PGK1, LDHB, PGAM1, GAPDH, PKM, ENO1
organic acid metabolic process	1.13323e-05	GO:0006082	21	7.31083	941	PARK7, TPI1, PSMA7, ANXA1, YARS, PSMB7, TARS, AHCY, MTHFD1, PGK1, GLO1, LDHB, GGH, EEF1E1, OAT, PGAM1, PHGDH, GAPDH, PKM, ENO1, DTD1
regulation of water loss via skin	1.23128e-05	GO:0033561	4	0.147615	19	FLG2, KRT1, KRT16, HRNR
glycolytic process	1.32479e-05	GO:0006096	6	0.520537	67	TPI1, PGK1, PGAM1, GAPDH, PKM, ENO1
cellular amide metabolic process	1.39389e-05	GO:0043603	21	7.41183	954	SSB, YARS, GSTP1, TARS, RPL27, MTHFD1, KRT17, EEF1D, RPS27A, EIF2S3, RAN, CLU, EIF4B, GLO1, RPS25, CTSZ, EEF1E1, PGAM1, GAPDH, EEF2, DTD1
ATP generation from ADP	1.44382e-05	GO:0006757	6	0.528306	68	TPI1, PGK1, PGAM1, GAPDH, PKM, ENO1
peptide metabolic process	1.76677e-05	GO:0006518	19	6.34745	817	SSB, YARS, GSTP1, TARS, RPL27, KRT17, EEF1D, RPS27A, EIF2S3, RAN, CLU, EIF4B, GLO1, RPS25, CTSZ, EEF1E1, GAPDH, EEF2, DTD1
regulation of protein ubiquitination	2.0807e-05	GO:0031396	10	1.89569	244	PARK7, PSMA7, CDK1, PSMB7, RPS27A, CLU, HSP90AA1, FKBP1A, CDK2, HSPA5
small molecule biosynthetic process	2.10433e-05	GO:0044283	14	3.71368	478	PARK7, TPI1, ANXA1, AKR1B1, TKT, AHCY, MTHFD1, PGK1, OAT, PGAM1, PHGDH, GAPDH, PKM, ENO1
coenzyme metabolic process	2.38201e-05	GO:0006732	11	2.3463	302	TPI1, TKT, AHCY, MTHFD1, PGK1, LDHB, GGH, PGAM1, GAPDH, PKM, ENO1
regulation of cellular catabolic process	2.69122e-05	GO:0031329	12	2.82799	364	PARK7, EZR, TIMP1, PSMA7, CDK1, HMGB1, PSMB7, RPS27A, CLU, MSN, SUMO2, PGAM1
ADP metabolic process	2.7413e-05	GO:0046031	6	0.59046	76	TPI1, PGK1, PGAM1, GAPDH, PKM, ENO1
nucleoside diphosphate metabolic process	2.83052e-05	GO:0009132	7	0.877921	113	NME1, TPI1, PGK1, PGAM1, GAPDH, PKM, ENO1
cofactor metabolic process	3.15777e-05	GO:0051186	12	2.87461	370	TPI1, AKR1B1, TKT, AHCY, MTHFD1, PGK1, LDHB, GGH, PGAM1, GAPDH, PKM, ENO1
negative regulation of ubiquitin-protein transferase activity	3.41982e-05	GO:0051444	6	0.613768	79	PARK7, PSMA7, CDK1, PSMB7, RPS27A, CDK2
chaperone-mediated protein folding	3.43026e-05	GO:0061077	5	0.372922	48	PPIB, CLU, FKBP1A, ST13, PDIA4
neutrophil homeostasis	3.71897e-05	GO:0001780	3	0.0699229	9	HMGB1, ANXA1, MTHFD1
regulation of protein modification by small protein conjugation or removal	4.07252e-05	GO:1903320	10	2.05107	264	PARK7, PSMA7, CDK1, PSMB7, RPS27A, CLU, HSP90AA1, FKBP1A, CDK2, HSPA5
hexose biosynthetic process	4.52767e-05	GO:0019319	6	0.644845	83	TPI1, AKR1B1, PGK1, PGAM1, GAPDH, ENO1
response to oxidative stress	4.64383e-05	GO:0006979	12	2.99115	385	PARK7, CDK1, ANXA1, GSTP1, AKR1B1, KRT1, PDLIM1, PRDX1, CDK2, PRDX6, EEF2, PRDX2
cytoskeletal anchoring at plasma membrane	5.28245e-05	GO:0007016	3	0.0776921	10	EZR, JUP, FLNB
protein stabilization	5.41138e-05	GO:0050821	7	0.971152	125	PARK7, PPIB, CLU, HSP90AA1, CCT7, GAPDH, DSG1
system development	5.50854e-05	GO:0048731	53	32.5608	4191	NME1, EZR, TIMP1, SF1, PSMA7, CDK1, HMGB1, ANXA1, KRT10, PRCP, FHL1, GSTP1, JUP, FLG2, AKR1B1, KRT1, PPIB, KRT2, PSMB7, MTHFD1, KRT17, TMED2, YWHAE, RPS27A, RAN, CLU, MSN, SART1, HSP90AA1, ARHGDIA, KRT9, GLO1, KRT16, YWHAQ, VCL, FKBP1A, PQBP1, ZFYVE27, HRNR, PLS3, PRDX1, CDK2, CTSZ, FLNB, PHGDH, HMGB2, PKM, HSPA5, ARF4, EEF2, UCHL1, DSP, CKB
glyceraldehyde-3-phosphate biosynthetic process	5.98964e-05	GO:0046166	2	0.0155384	2	TPI1, TKT
neutrophil clearance	5.98964e-05	GO:0097350	2	0.0155384	2	HMGB1, ANXA1
positive regulation of binding	6.29255e-05	GO:0051099	7	0.994459	128	PARK7, NME1, HMGB1, RAN, FKBP1A, HMGB2, ENO1
carbohydrate metabolic process	6.34403e-05	GO:0005975	17	5.78029	744	CHID1, TPI1, HMGB1, AKR1B1, MAGT1, TKT, SLC3A2, GANAB, RPS27A, PGK1, GLO1, LDHB, PGAM1, GAPDH, PKM, ARF4, ENO1
cellular response to reactive oxygen species	6.61109e-05	GO:0034614	7	1.00223	129	PARK7, CDK1, ANXA1, AKR1B1, PRDX1, CDK2, PRDX2
reactive oxygen species metabolic process	7.04855e-05	GO:0072593	9	1.76361	227	PARK7, PRCP, GSTP1, CLU, HSP90AA1, PRDX1, PRDX6, ARF4, PRDX2
purine ribonucleoside diphosphate metabolic process	7.60107e-05	GO:0009179	6	0.706998	91	TPI1, PGK1, PGAM1, GAPDH, PKM, ENO1
purine nucleoside diphosphate metabolic process	7.60107e-05	GO:0009135	6	0.706998	91	TPI1, PGK1, PGAM1, GAPDH, PKM, ENO1
positive regulation of cellular protein localization	7.95693e-05	GO:1903829	11	2.68038	345	PARK7, EZR, RUVBL1, CDK1, JUP, PSMB7, YWHAE, MSN, HSP90AA1, YWHAQ, CCT7
ribonucleoside diphosphate metabolic process	8.5829e-05	GO:0009185	6	0.722537	93	TPI1, PGK1, PGAM1, GAPDH, PKM, ENO1
positive regulation of cellular protein catabolic process	9.15382e-05	GO:1903364	8	1.42177	183	EZR, PSMA7, CDK1, PSMB7, RPS27A, CLU, MSN, SUMO2
cellular amino acid metabolic process	9.18861e-05	GO:0006520	10	2.26084	291	PSMA7, YARS, PSMB7, TARS, MTHFD1, GGH, EEF1E1, OAT, PHGDH, DTD1
protein catabolic process	9.20844e-05	GO:0030163	17	5.95899	767	PARK7, EZR, TIMP1, PSMA7, CDK1, PSMB7, RPS27A, CLU, MSN, SUMO2, UBA1, CTSZ, CTSD, HSP90B1, PCNP, HSPA5, UCHL1
proteasome-mediated ubiquitin-dependent protein catabolic process	9.2741e-05	GO:0043161	11	2.72699	351	PARK7, PSMA7, CDK1, PSMB7, RPS27A, CLU, SUMO2, HSP90B1, PCNP, HSPA5, UCHL1
single-organism carbohydrate catabolic process	0.000101172	GO:0044724	7	1.07215	138	TPI1, HMGB1, PGK1, PGAM1, GAPDH, PKM, ENO1
RNA splicing, via transesterification reactions	0.000105737	GO:0000375	10	2.29969	296	SNRPB, DHX15, SF1, GTF2F1, SART1, ALYREF, DNAJC8, PQBP1, PSPC1, KHSRP
anatomical structure development	0.000111332	GO:0048856	62	41.4254	5332	NME1, TPI1, EZR, TIMP1, SF1, PSMA7, CDK1, HMGB1, ANXA1, KRT10, PRCP, FHL1, GSTP1, JUP, FLG2, AKR1B1, CNN3, KRT1, PPIB, KRT2, PSMB7, MTHFD1, KRT17, TMED2, YWHAE, RPS27A, RAN, CLU, MSN, SART1, HSP90AA1, ARHGDIA, KRT9, PGK1, GLO1, KRT16, YWHAQ, VCL, FKBP1A, PQBP1, KRT14, ZFYVE27, HRNR, PLS3, PRDX1, TAGLN2, CDK2, CTSZ, KRT5, FLNB, KRT6B, PHGDH, HMGB2, PKM, HSPA5, ARF4, ENO1, EEF2, UCHL1, PKP1, DSP, C…
organonitrogen compound biosynthetic process	0.00011208	GO:1901566	24	10.5506	1358	PARK7, NME1, SSB, YARS, GSTP1, TARS, AHCY, RPL27, MTHFD1, KRT17, EEF1D, RPS27A, EIF2S3, RAN, EIF4B, PAICS, RPS25, EEF1E1, OAT, PHGDH, GAPDH, PKM, EEF2, DTD1
regulation of cellular protein catabolic process	0.000118525	GO:1903362	9	1.88792	243	PARK7, EZR, PSMA7, CDK1, PSMB7, RPS27A, CLU, MSN, SUMO2
developmental process	0.000126678	GO:0032502	63	42.5131	5472	NME1, TPI1, EZR, TIMP1, SF1, PSMA7, CDK1, HMGB1, ANXA1, KRT10, PRCP, FHL1, GSTP1, JUP, FLG2, AKR1B1, CNN3, KRT1, PPIB, KRT2, PSMB7, MTHFD1, KRT17, TMED2, YWHAE, RPS27A, RAN, CLU, MSN, SART1, HSP90AA1, ARHGDIA, KRT9, PGK1, GLO1, KRT16, YWHAQ, VCL, FKBP1A, PQBP1, KRT14, ZFYVE27, HRNR, PLS3, PRDX1, TAGLN2, CDK2, CTSZ, EEF1E1, KRT5, FLNB, KRT6B, PHGDH, HMGB2, PKM, HSPA5, ARF4, ENO1, EEF2, UCHL1, PKP1…
carbohydrate biosynthetic process	0.000137222	GO:0016051	8	1.50723	194	TPI1, AKR1B1, TKT, RPS27A, PGK1, PGAM1, GAPDH, ENO1
cellular aldehyde metabolic process	0.000138323	GO:0006081	5	0.49723	64	PARK7, TPI1, TKT, GLO1, PGAM1
mRNA metabolic process	0.000138424	GO:0016071	15	4.98783	642	SNRPB, DHX15, SF1, SSB, GTF2F1, RPL27, RPS27A, SART1, EIF4B, ALYREF, DNAJC8, PQBP1, RPS25, PSPC1, KHSRP
response to inorganic substance	0.000142773	GO:0010035	13	3.89238	501	PARK7, CDK1, ANXA1, GSTP1, AKR1B1, CLU, GGH, KRT14, PRDX1, CDK2, HSPA5, EEF2, PRDX2
carbohydrate catabolic process	0.000143837	GO:0016052	7	1.1343	146	TPI1, HMGB1, PGK1, PGAM1, GAPDH, PKM, ENO1
cellular protein catabolic process	0.000148158	GO:0044257	15	5.01891	646	PARK7, EZR, PSMA7, CDK1, PSMB7, RPS27A, CLU, MSN, SUMO2, UBA1, CTSZ, HSP90B1, PCNP, HSPA5, UCHL1
monosaccharide metabolic process	0.000151337	GO:0005996	9	1.95007	251	TPI1, HMGB1, AKR1B1, TKT, PGK1, PGAM1, GAPDH, PKM, ENO1
cytoskeleton organization	0.0001571	GO:0007010	20	8.11106	1044	EZR, CDK1, PFDN2, ANXA1, JUP, CNN3, KRT6A, KRT17, CHMP2B, RAN, ARHGDIA, KRT9, KRT16, KRT14, CDK2, FLNB, HSP90B1, GAPDH, PKP1, DSP
translation	0.000158483	GO:0006412	15	5.04999	650	SSB, YARS, TARS, RPL27, KRT17, EEF1D, RPS27A, EIF2S3, RAN, EIF4B, RPS25, EEF1E1, GAPDH, EEF2, DTD1
proteasomal protein catabolic process	0.000177674	GO:0010498	11	2.93676	378	PARK7, PSMA7, CDK1, PSMB7, RPS27A, CLU, SUMO2, HSP90B1, PCNP, HSPA5, UCHL1
protein localization	0.000195771	GO:0008104	34	18.312	2357	PARK7, EZR, RUVBL1, CDK1, SSB, HMGB1, ANXA1, PPIA, JUP, PSMB7, RPL27, TMED2, YWHAE, RPS27A, CHMP2B, RAN, CLU, MSN, HSP90AA1, YWHAQ, ARF3, VCL, FKBP1A, RPS25, ZFYVE27, PRDX1, FLNB, PDIA4, CCT7, HSP90B1, HSPA5, ARF4, HSPA4, DSP
alpha-amino acid biosynthetic process	0.000197671	GO:1901607	5	0.536076	69	PARK7, AHCY, MTHFD1, OAT, PHGDH
positive regulation of cellular catabolic process	0.000214558	GO:0031331	9	2.0433	263	EZR, PSMA7, CDK1, HMGB1, PSMB7, RPS27A, CLU, MSN, SUMO2
small molecule catabolic process	0.000220426	GO:0044282	10	2.51722	324	PARK7, TPI1, AHCY, PGK1, OAT, PGAM1, GAPDH, PKM, ENO1, DTD1
negative regulation of ubiquitin-protein ligase activity involved in mitotic cell cycle	0.000226185	GO:0051436	5	0.551614	71	PSMA7, CDK1, PSMB7, RPS27A, CDK2
cellular protein localization	0.0002316	GO:0034613	25	11.7704	1515	PARK7, EZR, RUVBL1, CDK1, SSB, JUP, PSMB7, RPL27, TMED2, YWHAE, RPS27A, RAN, MSN, HSP90AA1, YWHAQ, VCL, RPS25, ZFYVE27, PRDX1, FLNB, CCT7, HSP90B1, HSPA5, ARF4, HSPA4
peptide biosynthetic process	0.000238363	GO:0043043	15	5.24422	675	SSB, YARS, TARS, RPL27, KRT17, EEF1D, RPS27A, EIF2S3, RAN, EIF4B, RPS25, EEF1E1, GAPDH, EEF2, DTD1
regulation of ubiquitin-protein ligase activity involved in mitotic cell cycle	0.000241565	GO:0051439	5	0.559383	72	PSMA7, CDK1, PSMB7, RPS27A, CDK2
multicellular organism development	0.000243255	GO:0007275	56	37.0125	4764	NME1, TPI1, EZR, TIMP1, SF1, PSMA7, CDK1, HMGB1, ANXA1, KRT10, PRCP, FHL1, GSTP1, JUP, FLG2, AKR1B1, KRT1, PPIB, KRT2, PSMB7, MTHFD1, KRT17, TMED2, YWHAE, RPS27A, RAN, CLU, MSN, SART1, HSP90AA1, ARHGDIA, KRT9, GLO1, KRT16, YWHAQ, VCL, FKBP1A, PQBP1, ZFYVE27, HRNR, PLS3, PRDX1, CDK2, CTSZ, FLNB, PHGDH, HMGB2, PKM, HSPA5, ARF4, ENO1, EEF2, UCHL1, PKP1, DSP, CKB
response to toxic substance	0.000243666	GO:0009636	8	1.6393	211	PARK7, DHX15, CDK1, GSTP1, PRDX1, CDK2, PRDX6, PRDX2
cellular macromolecule localization	0.000251127	GO:0070727	25	11.8325	1523	PARK7, EZR, RUVBL1, CDK1, SSB, JUP, PSMB7, RPL27, TMED2, YWHAE, RPS27A, RAN, MSN, HSP90AA1, YWHAQ, VCL, RPS25, ZFYVE27, PRDX1, FLNB, CCT7, HSP90B1, HSPA5, ARF4, HSPA4
negative regulation of ubiquitin protein ligase activity	0.000257727	GO:1904667	5	0.567152	73	PSMA7, CDK1, PSMB7, RPS27A, CDK2
single-organism organelle organization	0.000270576	GO:1902589	27	13.332	1716	PARK7, SNRPB, EZR, RUVBL1, CDK1, ANXA1, JUP, CNN3, KRT6A, SMC2, KRT17, YWHAE, CHMP2B, RAN, HSP90AA1, ARHGDIA, KRT9, KRT16, YWHAQ, KRT14, CDK2, FLNB, HSP90B1, GAPDH, HSPA4, PKP1, DSP
regulation of ubiquitin-protein transferase activity	0.000275712	GO:0051438	6	0.893459	115	PARK7, PSMA7, CDK1, PSMB7, RPS27A, CDK2
response to stress	0.000289363	GO:0006950	46	28.4975	3668	PARK7, CHID1, SNRPB, EZR, RUVBL1, TIMP1, PSMA7, CDK1, HMGB1, ANXA1, STIP1, PRCP, GSTP1, AKR1B1, KRT1, PSMB7, AHCY, DCD, YWHAE, RPS27A, CLU, HSP90AA1, PDLIM1, KRT16, ALYREF, VCL, SUMO2, UBA1, UBE2NL, PRDX1, CDK2, HYOU1, EEF1E1, PDIA4, HSP90B1, GAPDH, HMGB2, PRDX6, PKM, HSPA5, ARF4, EEF2, HSPA4, UCHL1, PRDX2, DSP
substantia nigra development	0.000339348	GO:0021762	4	0.334076	43	YWHAE, YWHAQ, HSPA5, CKB
positive regulation of DNA binding	0.000339348	GO:0043388	4	0.334076	43	PARK7, NME1, HMGB1, HMGB2
pentose-phosphate shunt	0.000343264	GO:0006098	3	0.139846	18	TPI1, TKT, PGAM1
regulation of protein localization to early endosome	0.00035572	GO:1902965	2	0.0310768	4	EZR, MSN
positive regulation of protein localization to early endosome	0.00035572	GO:1902966	2	0.0310768	4	EZR, MSN
hydrogen peroxide metabolic process	0.000371049	GO:0042743	4	0.341845	44	PARK7, PRDX1, PRDX6, PRDX2
gluconeogenesis	0.000395014	GO:0006094	5	0.621537	80	TPI1, PGK1, PGAM1, GAPDH, ENO1
DNA geometric change	0.000418407	GO:0032392	5	0.629306	81	RUVBL1, HMGB1, ANXA1, RPS27A, HMGB2
positive regulation of protein ubiquitination	0.000420566	GO:0031398	7	1.35184	174	PSMA7, CDK1, PSMB7, RPS27A, CLU, FKBP1A, HSPA5
regulation of catabolic process	0.000422081	GO:0009894	12	3.79138	488	PARK7, EZR, TIMP1, PSMA7, CDK1, HMGB1, PSMB7, RPS27A, CLU, MSN, SUMO2, PGAM1
negative regulation of apoptotic process	0.00043082	GO:0043066	16	6.16099	793	PARK7, TIMP1, CDK1, ANXA1, GSTP1, YWHAE, RPS27A, CLU, ARHGDIA, GLO1, HYOU1, HSP90B1, HMGB2, HSPA5, ARF4, PRDX2
establishment of protein localization to membrane	0.000444834	GO:0090150	10	2.7503	354	EZR, JUP, RPL27, TMED2, YWHAE, RPS27A, HSP90AA1, YWHAQ, RPS25, HSPA4
establishment of protein localization to organelle	0.000461518	GO:0072594	14	4.98007	641	RUVBL1, CDK1, JUP, PSMB7, RPL27, YWHAE, RPS27A, RAN, HSP90AA1, YWHAQ, RPS25, PRDX1, CCT7, HSPA4
mRNA splicing, via spliceosome	0.000462034	GO:0000398	9	2.26861	292	SNRPB, DHX15, SF1, GTF2F1, SART1, ALYREF, DNAJC8, PQBP1, PSPC1
RNA splicing, via transesterification reactions with bulged adenosine as nucleophile	0.000462034	GO:0000377	9	2.26861	292	SNRPB, DHX15, SF1, GTF2F1, SART1, ALYREF, DNAJC8, PQBP1, PSPC1
regulation of protein catabolic process	0.000485631	GO:0042176	10	2.78138	358	PARK7, EZR, TIMP1, PSMA7, CDK1, PSMB7, RPS27A, CLU, MSN, SUMO2
negative regulation of protein ubiquitination	0.000489662	GO:0031397	6	0.994459	128	PARK7, PSMA7, CDK1, PSMB7, RPS27A, CDK2
regulation of ubiquitin protein ligase activity	0.000494887	GO:1904666	5	0.652614	84	PSMA7, CDK1, PSMB7, RPS27A, CDK2
negative regulation of programmed cell death	0.000500703	GO:0043069	16	6.24645	804	PARK7, TIMP1, CDK1, ANXA1, GSTP1, YWHAE, RPS27A, CLU, ARHGDIA, GLO1, HYOU1, HSP90B1, HMGB2, HSPA5, ARF4, PRDX2
single-organism catabolic process	0.000528431	GO:0044712	16	6.27752	808	PARK7, TPI1, HINT1, HMGB1, AHCY, PGK1, OAT, PGAM1, CTSD, HSP90B1, GAPDH, PRDX6, PKM, HSPA5, ENO1, DTD1
hexose metabolic process	0.000560049	GO:0019318	8	1.85684	239	TPI1, HMGB1, AKR1B1, PGK1, PGAM1, GAPDH, PKM, ENO1
membrane to membrane docking	0.000589835	GO:0022614	2	0.0388461	5	EZR, MSN
protein localization to early endosome	0.000589835	GO:1902946	2	0.0388461	5	EZR, MSN
purine ribonucleoside triphosphate metabolic process	0.000591582	GO:0009205	8	1.87238	241	PARK7, NME1, TPI1, PGK1, PGAM1, GAPDH, PKM, ENO1
keratinization	0.000607333	GO:0031424	4	0.388461	50	KRT2, KRT17, KRT16, HRNR
macromolecule localization	0.000625157	GO:0033036	36	21.0856	2714	PARK7, EZR, RUVBL1, CDK1, SSB, HMGB1, ANXA1, PPIA, JUP, PSMB7, RPL27, TMED2, YWHAE, RPS27A, CHMP2B, RAN, CLU, MSN, HSP90AA1, YWHAQ, ARF3, ALYREF, VCL, FKBP1A, RPS25, ZFYVE27, PRDX1, KHSRP, FLNB, PDIA4, CCT7, HSP90B1, HSPA5, ARF4, HSPA4, DSP
intracellular transport	0.000627744	GO:0046907	24	11.848	1525	PARK7, SNRPB, EZR, RUVBL1, CDK1, JUP, PSMB7, RPL27, TMED2, YWHAE, RPS27A, RAN, MSN, HSP90AA1, YWHAQ, ALYREF, RPS25, PRDX1, HYOU1, CTSZ, HSP90B1, ARF4, HSPA4, UCHL1
regulation of nuclease activity	0.000633276	GO:0032069	3	0.170923	22	HMGB1, HMGB2, HSPA5
hydrogen peroxide catabolic process	0.000633276	GO:0042744	3	0.170923	22	PRDX1, PRDX6, PRDX2
positive regulation of protein modification by small protein conjugation or removal	0.000646504	GO:1903322	7	1.45284	187	PSMA7, CDK1, PSMB7, RPS27A, CLU, FKBP1A, HSPA5
amide biosynthetic process	0.000653194	GO:0043604	15	5.77252	743	SSB, YARS, TARS, RPL27, KRT17, EEF1D, RPS27A, EIF2S3, RAN, EIF4B, RPS25, EEF1E1, GAPDH, EEF2, DTD1
response to endogenous stimulus	0.000663845	GO:0009719	24	11.8947	1531	PARK7, NME1, EZR, DHX15, TIMP1, CDK1, HMGB1, ANXA1, PRCP, GSTP1, JUP, AKR1B1, GTF2F1, RPS27A, RAN, FKBP1A, GGH, CDK2, HSP90B1, HMGB2, DSG1, PKM, HSPA5, EEF2
ribonucleoside triphosphate metabolic process	0.000694899	GO:0009199	8	1.919	247	PARK7, NME1, TPI1, PGK1, PGAM1, GAPDH, PKM, ENO1
negative regulation of protein modification by small protein conjugation or removal	0.000701107	GO:1903321	6	1.06438	137	PARK7, PSMA7, CDK1, PSMB7, RPS27A, CDK2
cellular response to stress	0.000702467	GO:0033554	27	14.1633	1823	PARK7, SNRPB, EZR, RUVBL1, CDK1, HMGB1, ANXA1, GSTP1, AKR1B1, YWHAE, RPS27A, CLU, HSP90AA1, ALYREF, SUMO2, UBA1, UBE2NL, PRDX1, CDK2, HYOU1, EEF1E1, PDIA4, HSP90B1, HMGB2, HSPA5, EEF2, PRDX2
purine nucleoside triphosphate metabolic process	0.000713453	GO:0009144	8	1.92676	248	PARK7, NME1, TPI1, PGK1, PGAM1, GAPDH, PKM, ENO1
positive regulation of protein ubiquitination involved in ubiquitin-dependent protein catabolic process	0.00071394	GO:2000060	5	0.706998	91	PSMA7, CDK1, PSMB7, RPS27A, CLU
glyceraldehyde-3-phosphate metabolic process	0.000724145	GO:0019682	3	0.178692	23	TPI1, TKT, PGAM1
removal of superoxide radicals	0.000724145	GO:0019430	3	0.178692	23	PARK7, PRDX1, PRDX2
protein refolding	0.000724145	GO:0042026	3	0.178692	23	HSP90AA1, FKBP1A, ST13
regulation of biological quality	0.000745223	GO:0065008	42	26.2599	3380	PARK7, NME1, EZR, PSMA7, HMGB1, ANXA1, PRCP, FHL1, GSTP1, JUP, FLG2, AKR1B1, KRT1, PPIB, PSMB7, MTHFD1, DCD, YWHAE, RPS27A, CHMP2B, CLU, MSN, HSP90AA1, KRT16, YWHAQ, VCL, FKBP1A, HRNR, PRDX1, CTSZ, KHSRP, FLNB, PDIA4, CCT7, HSP90B1, GAPDH, HMGB2, DSG1, HSPA5, DTD1, DSP, CKB
positive regulation of protein catabolic process	0.00075176	GO:0045732	8	1.9423	250	EZR, PSMA7, CDK1, PSMB7, RPS27A, CLU, MSN, SUMO2
protein targeting	0.000755973	GO:0006605	14	5.23645	674	RUVBL1, CDK1, JUP, PSMB7, RPL27, TMED2, YWHAE, RPS27A, RAN, HSP90AA1, YWHAQ, RPS25, PRDX1, HSPA4
cellular component biogenesis	0.000774988	GO:0044085	36	21.3265	2745	PARK7, SNRPB, EZR, RUVBL1, SF1, CDK1, HMGB1, PPIA, JUP, PFDN6, RPL27, TMED2, RPS27A, CHMP2B, EIF2S3, RAN, CLU, MSN, SART1, HSP90AA1, EIF4B, VCL, FKBP1A, RPS25, KRT14, CDK2, CTSZ, KRT5, OAT, ST13, HSP90B1, HMGB2, VBP1, DSG1, HSPA4, PKP1
superoxide metabolic process	0.000814279	GO:0006801	4	0.419537	54	PARK7, GSTP1, PRDX1, PRDX2
tissue morphogenesis	0.000874424	GO:0048729	13	4.70814	606	EZR, PSMA7, PSMB7, MTHFD1, KRT17, TMED2, RPS27A, MSN, KRT16, VCL, FKBP1A, CTSZ, DSP
regulation of protein folding	0.000880222	GO:1903332	2	0.0466153	6	ST13, HSPA5
protein import into mitochondrial outer membrane	0.000880222	GO:0045040	2	0.0466153	6	HSP90AA1, HSPA4
cardiac muscle cell-cardiac muscle cell adhesion	0.000880222	GO:0086042	2	0.0466153	6	JUP, DSP
bundle of His cell-Purkinje myocyte adhesion involved in cell communication	0.000880222	GO:0086073	2	0.0466153	6	JUP, DSP
intermediate filament bundle assembly	0.000880222	GO:0045110	2	0.0466153	6	KRT14, PKP1
methylglyoxal metabolic process	0.000880222	GO:0009438	2	0.0466153	6	PARK7, GLO1
positive regulation of catabolic process	0.000888354	GO:0009896	9	2.48615	320	EZR, PSMA7, CDK1, HMGB1, PSMB7, RPS27A, CLU, MSN, SUMO2
purine ribonucleoside monophosphate metabolic process	0.000899093	GO:0009167	8	1.99669	257	PARK7, TPI1, PGK1, PAICS, PGAM1, GAPDH, PKM, ENO1
regulation of cellular protein localization	0.000916506	GO:1903827	12	4.14099	533	PARK7, EZR, RUVBL1, CDK1, JUP, PSMB7, YWHAE, MSN, HSP90AA1, YWHAQ, PRDX1, CCT7
purine nucleoside monophosphate metabolic process	0.000921911	GO:0009126	8	2.00446	258	PARK7, TPI1, PGK1, PAICS, PGAM1, GAPDH, PKM, ENO1
cellular response to superoxide	0.000929838	GO:0071451	3	0.19423	25	PARK7, PRDX1, PRDX2
cellular response to oxygen radical	0.000929838	GO:0071450	3	0.19423	25	PARK7, PRDX1, PRDX2
RNA splicing	0.000937962	GO:0008380	10	3.02999	390	SNRPB, DHX15, SF1, GTF2F1, SART1, ALYREF, DNAJC8, PQBP1, PSPC1, KHSRP
nucleobase-containing small molecule metabolic process	0.000961539	GO:0055086	14	5.36853	691	PARK7, NME1, TPI1, HINT1, TKT, AHCY, MTHFD1, PGK1, LDHB, PAICS, PGAM1, GAPDH, PKM, ENO1
proteolysis involved in cellular protein catabolic process	0.000985639	GO:0051603	13	4.7703	614	PARK7, PSMA7, CDK1, PSMB7, RPS27A, CLU, SUMO2, UBA1, CTSZ, HSP90B1, PCNP, HSPA5, UCHL1
glucose metabolic process	0.000987987	GO:0006006	7	1.56161	201	TPI1, HMGB1, PGK1, PGAM1, GAPDH, PKM, ENO1
purine-containing compound metabolic process	0.0010093	GO:0072521	12	4.18761	539	PARK7, NME1, TPI1, HINT1, AHCY, MTHFD1, PGK1, PAICS, PGAM1, GAPDH, PKM, ENO1
purine ribonucleoside metabolic process	0.00103405	GO:0046128	9	2.54053	327	PARK7, NME1, TPI1, AHCY, PGK1, PGAM1, GAPDH, PKM, ENO1
regulation of protein ubiquitination involved in ubiquitin-dependent protein catabolic process	0.00104515	GO:2000058	5	0.769152	99	PSMA7, CDK1, PSMB7, RPS27A, CLU
response to transition metal nanoparticle	0.00104859	GO:1990267	6	1.14984	148	PARK7, CDK1, GSTP1, GGH, KRT14, HSPA5
multicellular organismal water homeostasis	0.0010666	GO:0050891	4	0.450614	58	FLG2, KRT1, KRT16, HRNR
cellular component assembly	0.00106697	GO:0022607	33	19.2599	2479	PARK7, SNRPB, EZR, RUVBL1, SF1, CDK1, HMGB1, PPIA, JUP, PFDN6, TMED2, RPS27A, CHMP2B, EIF2S3, CLU, MSN, SART1, HSP90AA1, EIF4B, VCL, FKBP1A, KRT14, CDK2, CTSZ, KRT5, OAT, ST13, HSP90B1, HMGB2, VBP1, DSG1, HSPA4, PKP1
nitrogen compound metabolic process	0.001079	GO:0006807	70	52.2946	6731	PARK7, CHID1, NME1, TPI1, SNRPB, EZR, FUBP1, HINT1, RUVBL1, DHX15, SF1, PSMA7, CDK1, SSB, HMGB1, ANXA1, PPIA, YARS, GSTP1, JUP, AKR1B1, TKT, S100A11, PSMB7, GTF2F1, TARS, AHCY, RPL27, MTHFD1, KRT17, EEF1D, RPS27A, EIF2S3, RAN, CLU, SART1, HSP90AA1, PDLIM1, PGK1, EIF4B, GLO1, YWHAQ, ALYREF, LDHB, PAICS, DNAJC8, PQBP1, SUMO2, RPS25, GGH, UBE2NL, CDK2, CTSZ, EEF1E1, PSPC1, KHSRP, OAT, PGAM1, CCT7, P…
regulation of reactive oxygen species metabolic process	0.00108574	GO:2000377	6	1.15761	149	PARK7, PRCP, GSTP1, CLU, HSP90AA1, ARF4
purine nucleoside metabolic process	0.00110215	GO:0042278	9	2.56384	330	PARK7, NME1, TPI1, AHCY, PGK1, PGAM1, GAPDH, PKM, ENO1
negative regulation of cell death	0.00113276	GO:0060548	16	6.74368	868	PARK7, TIMP1, CDK1, ANXA1, GSTP1, YWHAE, RPS27A, CLU, ARHGDIA, GLO1, HYOU1, HSP90B1, HMGB2, HSPA5, ARF4, PRDX2
glycosyl compound metabolic process	0.0011354	GO:1901657	10	3.10768	400	PARK7, NME1, TPI1, AKR1B1, AHCY, PGK1, PGAM1, GAPDH, PKM, ENO1
glucose 6-phosphate metabolic process	0.00116918	GO:0051156	3	0.209769	27	TPI1, TKT, PGAM1
protein localization to membrane	0.00117852	GO:0072657	11	3.68261	474	EZR, JUP, RPL27, TMED2, YWHAE, RPS27A, HSP90AA1, YWHAQ, RPS25, ZFYVE27, HSPA4
programmed cell death	0.00118633	GO:0012501	26	13.8991	1789	PARK7, NME1, HINT1, TIMP1, CDK1, HMGB1, ANXA1, YARS, GSTP1, YWHAE, RPS27A, CLU, SART1, HSP90AA1, ARHGDIA, GLO1, YWHAQ, HYOU1, EEF1E1, HSP90B1, GAPDH, HMGB2, PKM, HSPA5, ARF4, PRDX2
cellular localization	0.00122896	GO:0051641	32	18.615	2396	PARK7, SNRPB, EZR, RUVBL1, CDK1, SSB, JUP, PSMB7, RPL27, TMED2, YWHAE, RPS27A, CHMP2B, RAN, MSN, HSP90AA1, YWHAQ, ALYREF, VCL, FKBP1A, RPS25, ZFYVE27, PRDX1, HYOU1, CTSZ, FLNB, CCT7, HSP90B1, HSPA5, ARF4, HSPA4, UCHL1
ribonucleoside monophosphate metabolic process	0.0012338	GO:0009161	8	2.09769	270	PARK7, TPI1, PGK1, PAICS, PGAM1, GAPDH, PKM, ENO1
nucleotide metabolic process	0.00124427	GO:0009117	13	4.8946	630	PARK7, NME1, TPI1, HINT1, TKT, MTHFD1, PGK1, LDHB, PAICS, PGAM1, GAPDH, PKM, ENO1
nucleoside triphosphate metabolic process	0.00126318	GO:0009141	8	2.10546	271	PARK7, NME1, TPI1, PGK1, PGAM1, GAPDH, PKM, ENO1
modification-dependent protein catabolic process	0.0012761	GO:0019941	12	4.30414	554	PARK7, PSMA7, CDK1, PSMB7, RPS27A, CLU, SUMO2, UBA1, HSP90B1, PCNP, HSPA5, UCHL1
response to superoxide	0.00130208	GO:0000303	3	0.217538	28	PARK7, PRDX1, PRDX2
small molecule metabolic process	0.00134432	GO:0044281	27	14.7848	1903	PARK7, NME1, TPI1, HINT1, PSMA7, HMGB1, ANXA1, YARS, AKR1B1, TKT, PSMB7, TARS, AHCY, MTHFD1, PGK1, GLO1, LDHB, PAICS, GGH, EEF1E1, OAT, PGAM1, PHGDH, GAPDH, PKM, ENO1, DTD1
nucleoside phosphate metabolic process	0.00139335	GO:0006753	13	4.95676	638	PARK7, NME1, TPI1, HINT1, TKT, MTHFD1, PGK1, LDHB, PAICS, PGAM1, GAPDH, PKM, ENO1
modification-dependent macromolecule catabolic process	0.0014408	GO:0043632	12	4.3663	562	PARK7, PSMA7, CDK1, PSMB7, RPS27A, CLU, SUMO2, UBA1, HSP90B1, PCNP, HSPA5, UCHL1
response to oxygen radical	0.00144411	GO:0000305	3	0.225307	29	PARK7, PRDX1, PRDX2
regulation of protein stability	0.00149718	GO:0031647	7	1.67815	216	PARK7, PPIB, CLU, HSP90AA1, CCT7, GAPDH, DSG1
neural nucleus development	0.0015411	GO:0048857	4	0.49723	64	YWHAE, YWHAQ, HSPA5, CKB
cellular modified amino acid metabolic process	0.00156456	GO:0006575	6	1.24307	160	PARK7, GSTP1, MTHFD1, GLO1, GGH, EEF1E1
single-organism developmental process	0.00156779	GO:0044767	58	41.5187	5344	NME1, TPI1, EZR, TIMP1, SF1, PSMA7, CDK1, HMGB1, ANXA1, KRT10, PRCP, FHL1, GSTP1, JUP, FLG2, AKR1B1, KRT1, PPIB, KRT2, PSMB7, MTHFD1, KRT17, TMED2, YWHAE, RPS27A, RAN, CLU, MSN, SART1, HSP90AA1, ARHGDIA, KRT9, GLO1, KRT16, YWHAQ, VCL, FKBP1A, PQBP1, KRT14, ZFYVE27, HRNR, PLS3, PRDX1, CDK2, CTSZ, EEF1E1, FLNB, PHGDH, HMGB2, PKM, HSPA5, ARF4, ENO1, EEF2, UCHL1, PKP1, DSP, CKB
regulation of heart rate by cardiac conduction	0.0015955	GO:0086091	3	0.233076	30	JUP, YWHAE, DSP
establishment or maintenance of epithelial cell apical/basal polarity	0.0015955	GO:0045197	3	0.233076	30	EZR, MSN, ARF4
response to ischemia	0.0015955	GO:0002931	3	0.233076	30	HYOU1, EEF2, UCHL1
NIK/NF-kappaB signaling	0.00160534	GO:0038061	5	0.846844	109	EZR, PSMA7, HMGB1, PSMB7, RPS27A
nucleoside monophosphate metabolic process	0.00162495	GO:0009123	8	2.19092	282	PARK7, TPI1, PGK1, PAICS, PGAM1, GAPDH, PKM, ENO1
positive regulation of early endosome to late endosome transport	0.00162627	GO:2000643	2	0.0621537	8	EZR, MSN
ATP metabolic process	0.00166257	GO:0046034	7	1.70923	220	PARK7, TPI1, PGK1, PGAM1, GAPDH, PKM, ENO1
cellular response to oxidative stress	0.00166257	GO:0034599	7	1.70923	220	PARK7, CDK1, ANXA1, AKR1B1, PRDX1, CDK2, PRDX2
regulation of binding	0.00169872	GO:0051098	8	2.20646	284	PARK7, NME1, HMGB1, RAN, FKBP1A, HMGB2, HSPA5, ENO1
negative regulation of catalytic activity	0.00179451	GO:0043086	15	6.38629	822	PARK7, TIMP1, PEBP1, PSMA7, CDK1, ANXA1, GSTP1, CNN3, PSMB7, TMED2, YWHAE, RPS27A, FKBP1A, CDK2, UCHL1
regulation of proteolysis involved in cellular protein catabolic process	0.0017957	GO:1903050	7	1.73253	223	PARK7, PSMA7, CDK1, PSMB7, RPS27A, CLU, SUMO2
positive regulation of establishment of protein localization	0.00182892	GO:1904951	11	3.89238	501	EZR, RUVBL1, CDK1, HMGB1, PPIA, JUP, PSMB7, YWHAE, HSP90AA1, YWHAQ, CCT7
generation of precursor metabolites and energy	0.00185826	GO:0006091	9	2.76584	356	PARK7, TPI1, HMGB1, RPS27A, PGK1, PGAM1, GAPDH, PKM, ENO1
ribonucleoside metabolic process	0.00185826	GO:0009119	9	2.76584	356	PARK7, NME1, TPI1, AHCY, PGK1, PGAM1, GAPDH, PKM, ENO1
nucleobase-containing compound catabolic process	0.00204266	GO:0034655	9	2.80469	361	HINT1, HMGB1, AHCY, RPL27, RPS27A, EIF4B, RPS25, KHSRP, HMGB2
positive regulation of proteolysis involved in cellular protein catabolic process	0.00206387	GO:1903052	6	1.313	169	PSMA7, CDK1, PSMB7, RPS27A, CLU, SUMO2
morphogenesis of an epithelium	0.00206996	GO:0002009	11	3.95453	509	EZR, PSMA7, PSMB7, MTHFD1, KRT17, TMED2, RPS27A, MSN, KRT16, VCL, CTSZ
purine nucleotide metabolic process	0.00206996	GO:0006163	11	3.95453	509	PARK7, NME1, TPI1, HINT1, MTHFD1, PGK1, PAICS, PGAM1, GAPDH, PKM, ENO1
outer mitochondrial membrane organization	0.00208017	GO:0007008	2	0.0699229	9	HSP90AA1, HSPA4
DNA topological change	0.00208017	GO:0006265	2	0.0699229	9	HMGB1, HMGB2
positive regulation of cytoplasmic transport	0.00208017	GO:1903651	2	0.0699229	9	EZR, MSN
establishment of epithelial cell apical/basal polarity	0.00208017	GO:0045198	2	0.0699229	9	EZR, MSN
desmosome organization	0.00208017	GO:0002934	2	0.0699229	9	JUP, DSP
response to organic cyclic compound	0.00210369	GO:0014070	16	7.16321	922	PARK7, NME1, EZR, CDK1, HMGB1, ANXA1, GSTP1, JUP, SLC3A2, RAN, MSN, CDK2, HSP90B1, HMGB2, DSG1, EEF2
viral life cycle	0.00211144	GO:0019058	10	3.37961	435	SSB, PPIA, PPIB, GTF2F1, RPL27, RPS27A, CHMP2B, RAN, ALYREF, RPS25
water homeostasis	0.00214577	GO:0030104	4	0.543845	70	FLG2, KRT1, KRT16, HRNR
regulation of protein localization	0.00215008	GO:0032880	16	7.17875	924	PARK7, EZR, RUVBL1, CDK1, HMGB1, ANXA1, PPIA, JUP, PSMB7, YWHAE, MSN, HSP90AA1, YWHAQ, FKBP1A, PRDX1, CCT7
cellular component organization	0.00216703	GO:0016043	62	45.7917	5894	PARK7, NME1, SNRPB, EZR, RUVBL1, TIMP1, SF1, CDK1, PFDN2, HMGB1, ANXA1, PPIA, FHL1, JUP, PFDN6, CNN3, PSMB7, RPL27, KRT6A, SMC2, KRT17, TMED2, YWHAE, RPS27A, CHMP2B, EIF2S3, RAN, CLU, MSN, SART1, HSP90AA1, ARHGDIA, KRT9, EIF4B, KRT16, YWHAQ, VCL, FKBP1A, PQBP1, RPS25, KRT14, ZFYVE27, HRNR, CDK2, CTSZ, KRT5, FLNB, OAT, ST13, CCT7, PHGDH, HSP90B1, GAPDH, HMGB2, VBP1, DSG1, ARF4, ENO1, HSPA4, UCHL1,…
apoptotic process	0.00218635	GO:0006915	25	13.736	1768	PARK7, NME1, HINT1, TIMP1, CDK1, HMGB1, ANXA1, YARS, GSTP1, YWHAE, RPS27A, CLU, SART1, HSP90AA1, ARHGDIA, GLO1, YWHAQ, HYOU1, EEF1E1, HSP90B1, GAPDH, HMGB2, HSPA5, ARF4, PRDX2
membrane organization	0.00223669	GO:0061024	17	7.89352	1016	EZR, CDK1, ANXA1, PPIA, JUP, RPL27, TMED2, YWHAE, RPS27A, CHMP2B, CLU, HSP90AA1, YWHAQ, RPS25, ZFYVE27, CTSZ, HSPA4
cellular macromolecular complex assembly	0.00226981	GO:0034622	16	7.2176	929	SNRPB, RUVBL1, SF1, HMGB1, PFDN6, TMED2, RPS27A, EIF2S3, CLU, SART1, HSP90AA1, EIF4B, FKBP1A, HMGB2, VBP1, HSPA4
myeloid cell homeostasis	0.00227474	GO:0002262	5	0.916767	118	HMGB1, ANXA1, MTHFD1, PRDX1, HMGB2
NADP metabolic process	0.00229895	GO:0006739	3	0.264153	34	TPI1, TKT, PGAM1
single-organism biosynthetic process	0.00238477	GO:0044711	20	10.0767	1297	PARK7, NME1, TPI1, SF1, ANXA1, GSTP1, AKR1B1, TKT, AHCY, MTHFD1, RPS27A, PGK1, ARF3, PAICS, OAT, PGAM1, PHGDH, GAPDH, PKM, ENO1
response to alcohol	0.00238876	GO:0097305	6	1.35184	174	CDK1, GSTP1, JUP, GGH, CDK2, EEF2
ribose phosphate metabolic process	0.00251645	GO:0019693	11	4.05553	522	PARK7, NME1, TPI1, HINT1, TKT, PGK1, PAICS, PGAM1, GAPDH, PKM, ENO1
establishment of protein localization to mitochondrial membrane	0.00258753	GO:0090151	2	0.0776921	10	HSP90AA1, HSPA4
ATF6-mediated unfolded protein response	0.00258753	GO:0036500	2	0.0776921	10	HSP90B1, HSPA5
single-multicellular organism process	0.00264546	GO:0044707	61	45.1857	5816	PARK7, CHID1, NME1, TPI1, EZR, TIMP1, SF1, PSMA7, CDK1, HMGB1, ANXA1, KRT10, PRCP, FHL1, GSTP1, JUP, FLG2, AKR1B1, KRT1, PPIB, KRT2, PSMB7, MTHFD1, KRT17, TMED2, YWHAE, RPS27A, RAN, CLU, MSN, SART1, HSP90AA1, ARHGDIA, KRT9, GLO1, KRT16, YWHAQ, ALYREF, VCL, FKBP1A, PQBP1, KRT14, ZFYVE27, HRNR, PLS3, PRDX1, CDK2, CTSZ, FLNB, PHGDH, CTSD, HMGB2, PKM, HSPA5, ARF4, ENO1, EEF2, UCHL1, PKP1, DSP, CKB
posttranscriptional regulation of gene expression	0.00265496	GO:0010608	10	3.48838	449	PSMA7, PSMB7, KRT17, RPS27A, RAN, EIF4B, KHSRP, GAPDH, EEF2, DTD1
response to topologically incorrect protein	0.00267527	GO:0035966	6	1.38292	178	CLU, HSP90AA1, HYOU1, HSP90B1, HSPA5, HSPA4
cell death	0.00268527	GO:0008219	26	14.7227	1895	PARK7, NME1, HINT1, TIMP1, CDK1, HMGB1, ANXA1, YARS, GSTP1, YWHAE, RPS27A, CLU, SART1, HSP90AA1, ARHGDIA, GLO1, YWHAQ, HYOU1, EEF1E1, HSP90B1, GAPDH, HMGB2, PKM, HSPA5, ARF4, PRDX2
protein transport	0.00270545	GO:0015031	25	13.9535	1796	PARK7, EZR, RUVBL1, CDK1, HMGB1, ANXA1, PPIA, JUP, PSMB7, RPL27, TMED2, YWHAE, RPS27A, CHMP2B, RAN, CLU, HSP90AA1, YWHAQ, ARF3, RPS25, PRDX1, PDIA4, HSP90B1, ARF4, HSPA4
response to hydrogen peroxide	0.00272423	GO:0042542	5	0.955613	123	PARK7, CDK1, ANXA1, AKR1B1, EEF2
nucleoside metabolic process	0.00278171	GO:0009116	9	2.93676	378	PARK7, NME1, TPI1, AHCY, PGK1, PGAM1, GAPDH, PKM, ENO1
DNA metabolic process	0.00280606	GO:0006259	16	7.37298	949	NME1, RUVBL1, CDK1, HMGB1, ANXA1, PPIA, S100A11, RPS27A, RAN, ALYREF, SUMO2, UBE2NL, CDK2, CCT7, HMGB2, DTD1
positive regulation of protein localization to nucleus	0.00282132	GO:1900182	5	0.963382	124	PARK7, CDK1, JUP, HSP90AA1, CCT7
macromolecular complex assembly	0.00286165	GO:0065003	23	12.4774	1606	PARK7, SNRPB, RUVBL1, SF1, CDK1, HMGB1, JUP, PFDN6, TMED2, RPS27A, EIF2S3, CLU, MSN, SART1, HSP90AA1, EIF4B, FKBP1A, CTSZ, OAT, ST13, HMGB2, VBP1, HSPA4
positive regulation of ubiquitin-protein ligase activity involved in regulation of mitotic cell cycle transition	0.0028971	GO:0051437	4	0.59046	76	PSMA7, CDK1, PSMB7, RPS27A
establishment or maintenance of bipolar cell polarity	0.00293487	GO:0061245	3	0.287461	37	EZR, MSN, ARF4
establishment or maintenance of apical/basal cell polarity	0.00293487	GO:0035088	3	0.287461	37	EZR, MSN, ARF4
oxidation-reduction process	0.00295548	GO:0055114	16	7.41183	954	PARK7, TPI1, HMGB1, AKR1B1, MTHFD1, RPS27A, PGK1, LDHB, PRDX1, PGAM1, PHGDH, GAPDH, PRDX6, PKM, ENO1, PRDX2
mRNA processing	0.002966	GO:0006397	10	3.54276	456	SNRPB, DHX15, SF1, GTF2F1, SART1, ALYREF, DNAJC8, PQBP1, PSPC1, KHSRP
establishment of protein localization to mitochondrion	0.00298685	GO:0072655	6	1.414	182	RUVBL1, PSMB7, YWHAE, HSP90AA1, YWHAQ, HSPA4
anaphase-promoting complex-dependent catabolic process	0.00303772	GO:0031145	4	0.598229	77	PSMA7, CDK1, PSMB7, RPS27A
cellular response to hydrogen peroxide	0.00303772	GO:0070301	4	0.598229	77	PARK7, CDK1, ANXA1, AKR1B1
response to organonitrogen compound	0.00310795	GO:0010243	14	6.09106	784	NME1, EZR, DHX15, TIMP1, CDK1, ANXA1, GSTP1, JUP, AKR1B1, GGH, CDK2, HSP90B1, PKM, EEF2
regulation of amyloid precursor protein catabolic process	0.00314648	GO:1902991	2	0.0854613	11	CLU, FKBP1A
bundle of His cell to Purkinje myocyte communication	0.00314648	GO:0086069	2	0.0854613	11	JUP, DSP
protein folding in endoplasmic reticulum	0.00314648	GO:0034975	2	0.0854613	11	HSP90B1, HSPA5
hemidesmosome assembly	0.00314648	GO:0031581	2	0.0854613	11	KRT14, KRT5
regulation of ventricular cardiac muscle cell action potential	0.00314648	GO:0098911	2	0.0854613	11	JUP, DSP
G2/M transition of mitotic cell cycle	0.00315246	GO:0000086	6	1.42954	184	CDK1, FHL1, YWHAE, RPS27A, HSP90AA1, CDK2
virion assembly	0.00316846	GO:0019068	3	0.29523	38	PPIA, RPS27A, CHMP2B
protein localization to mitochondrion	0.00332484	GO:0070585	6	1.44507	186	RUVBL1, PSMB7, YWHAE, HSP90AA1, YWHAQ, HSPA4
regulation of response to stress	0.00335283	GO:0080134	20	10.3797	1336	PARK7, CHID1, SNRPB, EZR, PSMA7, HMGB1, ANXA1, GSTP1, KRT1, PSMB7, YWHAE, RPS27A, CLU, HSP90AA1, PRDX1, HYOU1, EEF1E1, HSP90B1, HMGB2, HSPA5
heterocycle catabolic process	0.00336325	GO:0046700	9	3.02222	389	HINT1, HMGB1, AHCY, RPL27, RPS27A, EIF4B, RPS25, KHSRP, HMGB2
single-organism metabolic process	0.00338319	GO:0044710	45	30.9448	3983	PARK7, NME1, TPI1, EZR, HINT1, SF1, PEBP1, PSMA7, CDK1, HMGB1, ANXA1, YARS, GSTP1, AKR1B1, MAGT1, TKT, PSMB7, TARS, AHCY, MTHFD1, RPS27A, CLU, PGK1, GLO1, ARF3, LDHB, PAICS, FKBP1A, GGH, PRDX1, EEF1E1, OAT, PGAM1, PHGDH, CTSD, HSP90B1, GAPDH, PRDX6, PKM, HSPA5, ARF4, ENO1, UCHL1, DTD1, PRDX2
inflammatory response to antigenic stimulus	0.00341316	GO:0002437	3	0.302999	39	HMGB1, AHCY, HMGB2
morphogenesis of a polarized epithelium	0.00345724	GO:0001738	5	1.01	130	EZR, PSMA7, PSMB7, RPS27A, MSN
positive regulation of ubiquitin protein ligase activity	0.00348741	GO:1904668	4	0.621537	80	PSMA7, CDK1, PSMB7, RPS27A
ubiquitin-dependent protein catabolic process	0.00354569	GO:0006511	11	4.24199	546	PARK7, PSMA7, CDK1, PSMB7, RPS27A, CLU, SUMO2, HSP90B1, PCNP, HSPA5, UCHL1
regulation of G1/S transition of mitotic cell cycle	0.00357245	GO:2000045	5	1.01777	131	CDK1, ANXA1, FHL1, RPS27A, CDK2
establishment of localization in cell	0.00364835	GO:0051649	26	15.0567	1938	PARK7, SNRPB, EZR, RUVBL1, CDK1, JUP, PSMB7, RPL27, TMED2, YWHAE, RPS27A, CHMP2B, RAN, MSN, HSP90AA1, YWHAQ, ALYREF, FKBP1A, RPS25, PRDX1, HYOU1, CTSZ, HSP90B1, ARF4, HSPA4, UCHL1
translational initiation	0.00369057	GO:0006413	6	1.47615	190	SSB, RPL27, RPS27A, EIF2S3, EIF4B, RPS25
cellular nitrogen compound catabolic process	0.0037186	GO:0044270	9	3.06884	395	HINT1, HMGB1, AHCY, RPL27, RPS27A, EIF4B, RPS25, KHSRP, HMGB2
negative regulation of CD4-positive, alpha-beta T cell differentiation	0.00375662	GO:0043371	2	0.0932305	12	HMGB1, ANXA1
protein localization to endosome	0.00375662	GO:0036010	2	0.0932305	12	EZR, MSN
DNA ligation involved in DNA repair	0.00375662	GO:0051103	2	0.0932305	12	HMGB1, HMGB2
lactate metabolic process	0.00375662	GO:0006089	2	0.0932305	12	PARK7, LDHB
keratinocyte migration	0.00375662	GO:0051546	2	0.0932305	12	KRT2, KRT16
response to organic substance	0.00383768	GO:0010033	34	21.6373	2785	PARK7, NME1, EZR, DHX15, TIMP1, PSMA7, CDK1, HMGB1, ANXA1, PRCP, GSTP1, JUP, AKR1B1, PSMB7, GTF2F1, SLC3A2, RPS27A, RAN, CLU, MSN, HSP90AA1, FKBP1A, GGH, ZFYVE27, CDK2, HYOU1, HSP90B1, GAPDH, HMGB2, DSG1, PKM, HSPA5, EEF2, HSPA4
regulation of establishment of protein localization	0.00384697	GO:0070201	14	6.23868	803	PARK7, EZR, RUVBL1, CDK1, HMGB1, ANXA1, PPIA, JUP, PSMB7, YWHAE, HSP90AA1, YWHAQ, PRDX1, CCT7
ncRNA metabolic process	0.00384956	GO:0034660	11	4.28861	552	SSB, YARS, GTF2F1, TARS, RPL27, RPS27A, SART1, RPS25, EEF1E1, KHSRP, DTD1
cell cycle G2/M phase transition	0.00388426	GO:0044839	6	1.49169	192	CDK1, FHL1, YWHAE, RPS27A, HSP90AA1, CDK2
intracellular protein transport	0.00392108	GO:0006886	16	7.62937	982	PARK7, RUVBL1, CDK1, JUP, PSMB7, RPL27, TMED2, YWHAE, RPS27A, RAN, HSP90AA1, YWHAQ, RPS25, PRDX1, HSP90B1, HSPA4
response to nitrogen compound	0.00394024	GO:1901698	15	6.93791	893	NME1, EZR, DHX15, TIMP1, CDK1, ANXA1, GSTP1, JUP, AKR1B1, SLC3A2, GGH, CDK2, HSP90B1, PKM, EEF2
positive regulation of reactive oxygen species metabolic process	0.00398037	GO:2000379	4	0.644845	83	PARK7, GSTP1, CLU, HSP90AA1
cellular oxidant detoxification	0.00398037	GO:0098869	4	0.644845	83	PARK7, PRDX1, PRDX6, PRDX2
organ regeneration	0.00398037	GO:0031100	4	0.644845	83	CDK1, GSTP1, CDK2, PKM
regulation of apoptotic process	0.00403179	GO:0042981	20	10.5506	1358	PARK7, NME1, TIMP1, CDK1, HMGB1, ANXA1, GSTP1, YWHAE, RPS27A, CLU, ARHGDIA, GLO1, YWHAQ, HYOU1, EEF1E1, HSP90B1, HMGB2, HSPA5, ARF4, PRDX2
alpha-amino acid metabolic process	0.0040854	GO:1901605	6	1.50723	194	PARK7, AHCY, MTHFD1, GGH, OAT, PHGDH
aromatic compound catabolic process	0.00410284	GO:0019439	9	3.11545	401	HINT1, HMGB1, AHCY, RPL27, RPS27A, EIF4B, RPS25, KHSRP, HMGB2
regulation of cellular response to stress	0.00411843	GO:0080135	11	4.32745	557	PARK7, EZR, HMGB1, GSTP1, YWHAE, CLU, HSP90AA1, PRDX1, HYOU1, EEF1E1, HSPA5
establishment of protein localization	0.00415957	GO:0045184	26	15.2043	1957	PARK7, EZR, RUVBL1, CDK1, HMGB1, ANXA1, PPIA, JUP, PSMB7, RPL27, TMED2, YWHAE, RPS27A, CHMP2B, RAN, CLU, HSP90AA1, YWHAQ, ARF3, RPS25, PRDX1, PDIA4, CCT7, HSP90B1, ARF4, HSPA4
response to ethanol	0.00419028	GO:0045471	5	1.05661	136	CDK1, GSTP1, GGH, CDK2, EEF2
cellular component organization or biogenesis	0.00422225	GO:0071840	62	46.9571	6044	PARK7, NME1, SNRPB, EZR, RUVBL1, TIMP1, SF1, CDK1, PFDN2, HMGB1, ANXA1, PPIA, FHL1, JUP, PFDN6, CNN3, PSMB7, RPL27, KRT6A, SMC2, KRT17, TMED2, YWHAE, RPS27A, CHMP2B, EIF2S3, RAN, CLU, MSN, SART1, HSP90AA1, ARHGDIA, KRT9, EIF4B, KRT16, YWHAQ, VCL, FKBP1A, PQBP1, RPS25, KRT14, ZFYVE27, HRNR, CDK2, CTSZ, KRT5, FLNB, OAT, ST13, CCT7, PHGDH, HSP90B1, GAPDH, HMGB2, VBP1, DSG1, ARF4, ENO1, HSPA4, UCHL1,…
aldehyde biosynthetic process	0.00441713	GO:0046184	2	0.101	13	TPI1, TKT
establishment of apical/basal cell polarity	0.00441713	GO:0035089	2	0.101	13	EZR, MSN
homocysteine metabolic process	0.00441713	GO:0050667	2	0.101	13	AHCY, MTHFD1
positive regulation of protein import into nucleus, translocation	0.00441713	GO:0033160	2	0.101	13	CDK1, HSP90AA1
cellular nitrogen compound metabolic process	0.00442324	GO:0034641	64	48.9538	6301	PARK7, NME1, TPI1, SNRPB, EZR, FUBP1, HINT1, RUVBL1, DHX15, SF1, PSMA7, CDK1, SSB, HMGB1, ANXA1, PPIA, YARS, GSTP1, JUP, TKT, S100A11, PSMB7, GTF2F1, TARS, AHCY, RPL27, MTHFD1, KRT17, EEF1D, RPS27A, EIF2S3, RAN, CLU, SART1, HSP90AA1, PDLIM1, PGK1, EIF4B, GLO1, YWHAQ, ALYREF, LDHB, PAICS, DNAJC8, PQBP1, SUMO2, RPS25, UBE2NL, CDK2, CTSZ, EEF1E1, PSPC1, KHSRP, PGAM1, CCT7, GAPDH, HMGB2, PKM, TMPO, H…
regulation of programmed cell death	0.00444827	GO:0043067	20	10.6438	1370	PARK7, NME1, TIMP1, CDK1, HMGB1, ANXA1, GSTP1, YWHAE, RPS27A, CLU, ARHGDIA, GLO1, YWHAQ, HYOU1, EEF1E1, HSP90B1, HMGB2, HSPA5, ARF4, PRDX2
response to metal ion	0.00449815	GO:0010038	8	2.58715	333	PARK7, CDK1, GSTP1, CLU, GGH, KRT14, CDK2, HSPA5
protein peptidyl-prolyl isomerization	0.00450694	GO:0000413	3	0.334076	43	PPIA, PPIB, FKBP1A
serine family amino acid metabolic process	0.00450694	GO:0009069	3	0.334076	43	AHCY, MTHFD1, PHGDH
maintenance of protein location in cell	0.00451848	GO:0032507	4	0.668152	86	EZR, JUP, FLNB, HSPA5
cellular detoxification	0.00451848	GO:1990748	4	0.668152	86	PARK7, PRDX1, PRDX6, PRDX2
negative regulation of protein modification process	0.0045797	GO:0031400	11	4.3896	565	PARK7, EZR, PSMA7, CDK1, GSTP1, PSMB7, YWHAE, RPS27A, FKBP1A, CDK2, UCHL1
positive regulation of viral life cycle	0.0047082	GO:1903902	4	0.675921	87	PPIA, PPIB, GTF2F1, CHMP2B
single-organism carbohydrate metabolic process	0.00477661	GO:0044723	12	5.05776	651	TPI1, HMGB1, AKR1B1, MAGT1, TKT, RPS27A, PGK1, PGAM1, GAPDH, PKM, ARF4, ENO1
regulation of cell cycle G1/S phase transition	0.00488093	GO:1902806	5	1.09546	141	CDK1, ANXA1, FHL1, RPS27A, CDK2
midbrain development	0.00490321	GO:0030901	4	0.683691	88	YWHAE, YWHAQ, HSPA5, CKB
purine ribonucleotide metabolic process	0.0050566	GO:0009150	10	3.82245	492	PARK7, NME1, TPI1, HINT1, PGK1, PAICS, PGAM1, GAPDH, PKM, ENO1
detoxification	0.00510357	GO:0098754	4	0.69146	89	PARK7, PRDX1, PRDX6, PRDX2
epithelial cell-cell adhesion	0.00512719	GO:0090136	2	0.108769	14	JUP, VCL
positive regulation of vacuolar transport	0.00512719	GO:1903337	2	0.108769	14	EZR, MSN
regulation of cellular carbohydrate catabolic process	0.00512719	GO:0043471	2	0.108769	14	HMGB1, PGAM1
polarized epithelial cell differentiation	0.00512719	GO:0030859	2	0.108769	14	EZR, MSN
negative regulation of cytokine production	0.00520876	GO:0001818	6	1.58492	204	CHID1, EZR, HMGB1, ANXA1, GSTP1, RPS27A
negative regulation of transferase activity	0.00526794	GO:0051348	8	2.65707	342	PARK7, PSMA7, CDK1, GSTP1, PSMB7, RPS27A, CDK2, UCHL1
positive regulation of reactive oxygen species biosynthetic process	0.00545091	GO:1903428	3	0.357384	46	PARK7, CLU, HSP90AA1
cellular carbohydrate catabolic process	0.00545091	GO:0044275	3	0.357384	46	TPI1, HMGB1, PGAM1
negative regulation of protein metabolic process	0.00547873	GO:0051248	16	7.90129	1017	PARK7, EZR, TIMP1, PEBP1, PSMA7, CDK1, GSTP1, PSMB7, YWHAE, RPS27A, RAN, CLU, FKBP1A, CDK2, GAPDH, UCHL1
negative regulation of G1/S transition of mitotic cell cycle	0.0055206	GO:2000134	4	0.706998	91	CDK1, FHL1, RPS27A, CDK2
organic cyclic compound catabolic process	0.0056981	GO:1901361	9	3.27861	422	HINT1, HMGB1, AHCY, RPL27, RPS27A, EIF4B, RPS25, KHSRP, HMGB2
protein ubiquitination	0.00570082	GO:0016567	13	5.84245	752	PARK7, PSMA7, CDK1, PSMB7, RPS27A, CLU, HSP90AA1, FKBP1A, UBA1, UBE2NL, CDK2, PCNP, HSPA5
organic acid biosynthetic process	0.00570166	GO:0016053	7	2.13653	275	PARK7, ANXA1, AHCY, MTHFD1, OAT, PHGDH, PKM
maintenance of protein location	0.00573741	GO:0045185	4	0.714768	92	EZR, JUP, FLNB, HSPA5
DNA conformation change	0.00581311	GO:0071103	7	2.1443	276	RUVBL1, CDK1, HMGB1, ANXA1, SMC2, RPS27A, HMGB2
regulation of telomerase RNA localization to Cajal body	0.00588602	GO:1904872	2	0.116538	15	RUVBL1, CCT7
establishment of monopolar cell polarity	0.00588602	GO:0061162	2	0.116538	15	EZR, MSN
positive regulation of telomerase RNA localization to Cajal body	0.00588602	GO:1904874	2	0.116538	15	RUVBL1, CCT7
negative regulation of alpha-beta T cell differentiation	0.00588602	GO:0046639	2	0.116538	15	HMGB1, ANXA1
response to mercury ion	0.00588602	GO:0046689	2	0.116538	15	PARK7, GSTP1
negative regulation of CD4-positive, alpha-beta T cell activation	0.00588602	GO:2000515	2	0.116538	15	HMGB1, ANXA1
positive regulation of nuclease activity	0.00588602	GO:0032075	2	0.116538	15	HMGB2, HSPA5
mitochondrial membrane organization	0.00595983	GO:0007006	4	0.722537	93	YWHAE, HSP90AA1, YWHAQ, HSPA4
regulation of DNA binding	0.00595983	GO:0051101	4	0.722537	93	PARK7, NME1, HMGB1, HMGB2
positive regulation of intracellular transport	0.00604089	GO:0032388	7	2.15984	278	EZR, RUVBL1, CDK1, JUP, PSMB7, MSN, HSP90AA1
negative regulation of cell cycle G1/S phase transition	0.00618791	GO:1902807	4	0.730306	94	CDK1, FHL1, RPS27A, CDK2
ribonucleotide metabolic process	0.00621352	GO:0009259	10	3.93899	507	PARK7, NME1, TPI1, HINT1, PGK1, PAICS, PGAM1, GAPDH, PKM, ENO1
viral process	0.00622893	GO:0016032	16	8.01006	1031	SNRPB, PSMA7, SSB, PPIA, PPIB, PSMB7, GTF2F1, RPL27, YWHAE, RPS27A, CHMP2B, RAN, CLU, ALYREF, RPS25, ENO1
regulation of protein localization to nucleus	0.00625892	GO:1900180	6	1.64707	212	PARK7, CDK1, JUP, HSP90AA1, PRDX1, CCT7
multi-organism cellular process	0.00645798	GO:0044764	16	8.04113	1035	SNRPB, PSMA7, SSB, PPIA, PPIB, PSMB7, GTF2F1, RPL27, YWHAE, RPS27A, CHMP2B, RAN, CLU, ALYREF, RPS25, ENO1
tRNA aminoacylation for protein translation	0.00650513	GO:0006418	3	0.380691	49	YARS, TARS, EEF1E1
telomerase RNA localization to Cajal body	0.00669282	GO:0090671	2	0.124307	16	RUVBL1, CCT7
V(D)J recombination	0.00669282	GO:0033151	2	0.124307	16	HMGB1, HMGB2
telomerase RNA localization	0.00669282	GO:0090672	2	0.124307	16	RUVBL1, CCT7
RNA localization to Cajal body	0.00669282	GO:0090670	2	0.124307	16	RUVBL1, CCT7
establishment or maintenance of monopolar cell polarity	0.00669282	GO:0061339	2	0.124307	16	EZR, MSN
regulation of early endosome to late endosome transport	0.00669282	GO:2000641	2	0.124307	16	EZR, MSN
single-organism membrane organization	0.00676201	GO:0044802	14	6.65821	857	EZR, CDK1, ANXA1, JUP, RPL27, TMED2, YWHAE, RPS27A, CLU, HSP90AA1, YWHAQ, RPS25, ZFYVE27, HSPA4
cardiac muscle cell action potential	0.00688157	GO:0086001	3	0.388461	50	JUP, YWHAE, DSP
protein import into nucleus, translocation	0.00688157	GO:0000060	3	0.388461	50	CDK1, RAN, HSP90AA1
primary metabolic process	0.0069719	GO:0044238	91	77.0706	9920	PARK7, CHID1, NME1, TPI1, SNRPB, EZR, FUBP1, HINT1, RUVBL1, DHX15, TIMP1, SF1, PEBP1, PSMA7, CDK1, SSB, HMGB1, ANXA1, PPIA, PRCP, YARS, GSTP1, JUP, AKR1B1, KRT1, MAGT1, PPIB, TKT, S100A11, PSMB7, GTF2F1, TARS, AHCY, RPL27, MTHFD1, DCD, KRT17, SLC3A2, EEF1D, GANAB, YWHAE, RPS27A, EIF2S3, RAN, CLU, MSN, SART1, HSP90AA1, PDLIM1, PGK1, EIF4B, GLO1, YWHAQ, ARF3, ALYREF, LDHB, PAICS, FKBP1A, DNAJC8, PQ…
cellular ketone metabolic process	0.00698898	GO:0042180	6	1.68592	217	PARK7, PSMA7, ANXA1, AKR1B1, PSMB7, GLO1
regulation of cellular amide metabolic process	0.00699314	GO:0034248	8	2.78915	359	KRT17, RAN, CLU, EIF4B, PGAM1, GAPDH, EEF2, DTD1
aging	0.00701934	GO:0007568	7	2.22199	286	TIMP1, CDK1, CLU, KRT16, KRT14, EEF1E1, EEF2
multi-organism process	0.00737138	GO:0051704	29	18.3431	2361	PARK7, SNRPB, RUVBL1, TIMP1, PSMA7, CDK1, SSB, PPIA, GSTP1, AKR1B1, PPIB, PSMB7, GTF2F1, RPL27, DCD, TMED2, YWHAE, RPS27A, CHMP2B, RAN, CLU, DNAJC9, KRT9, ALYREF, RPS25, CCT7, HMGB2, DSG1, ENO1
regulation of mitotic cell cycle phase transition	0.00741506	GO:1901990	7	2.2453	289	PSMA7, CDK1, ANXA1, FHL1, PSMB7, RPS27A, CDK2
maintenance of location in cell	0.00741648	GO:0051651	4	0.769152	99	EZR, JUP, FLNB, HSPA5
protein modification by small protein conjugation	0.00753368	GO:0032446	14	6.74368	868	PARK7, PSMA7, CDK1, PSMB7, RPS27A, CLU, HSP90AA1, FKBP1A, SUMO2, UBA1, UBE2NL, CDK2, PCNP, HSPA5
regulation of cytoplasmic transport	0.00754681	GO:1903649	2	0.132077	17	EZR, MSN
T-helper 1 cell differentiation	0.00754681	GO:0045063	2	0.132077	17	HMGB1, ANXA1
serine family amino acid biosynthetic process	0.00754681	GO:0009070	2	0.132077	17	MTHFD1, PHGDH
negative regulation of cellular protein metabolic process	0.00764523	GO:0032269	15	7.46621	961	PARK7, EZR, TIMP1, PEBP1, PSMA7, CDK1, GSTP1, PSMB7, YWHAE, RPS27A, RAN, FKBP1A, CDK2, GAPDH, UCHL1
amino acid activation	0.00767266	GO:0043038	3	0.403999	52	YARS, TARS, EEF1E1
tRNA aminoacylation	0.00767266	GO:0043039	3	0.403999	52	YARS, TARS, EEF1E1
positive regulation of ubiquitin-protein transferase activity	0.00767994	GO:0051443	4	0.776921	100	PSMA7, CDK1, PSMB7, RPS27A
positive regulation of viral process	0.00767994	GO:0048524	4	0.776921	100	PPIA, PPIB, GTF2F1, CHMP2B
symbiosis, encompassing mutualism through parasitism	0.00811902	GO:0044403	16	8.24313	1061	SNRPB, PSMA7, SSB, PPIA, PPIB, PSMB7, GTF2F1, RPL27, YWHAE, RPS27A, CHMP2B, RAN, CLU, ALYREF, RPS25, ENO1
interspecies interaction between organisms	0.00811902	GO:0044419	16	8.24313	1061	SNRPB, PSMA7, SSB, PPIA, PPIB, PSMB7, GTF2F1, RPL27, YWHAE, RPS27A, CHMP2B, RAN, CLU, ALYREF, RPS25, ENO1
negative regulation of molecular function	0.00847478	GO:0044092	16	8.28198	1066	PARK7, TIMP1, PEBP1, PSMA7, CDK1, ANXA1, GSTP1, CNN3, PSMB7, TMED2, YWHAE, RPS27A, FKBP1A, CDK2, HSPA5, UCHL1
cytoplasmic translation	0.00851532	GO:0002181	3	0.419537	54	SSB, EIF4B, EEF2
RNA processing	0.00853197	GO:0006396	14	6.84468	881	SNRPB, DHX15, SF1, SSB, GTF2F1, RPL27, RPS27A, SART1, ALYREF, DNAJC8, PQBP1, RPS25, PSPC1, KHSRP
ribonucleoprotein complex biogenesis	0.00876615	GO:0022613	9	3.51168	452	SNRPB, SF1, RPL27, RPS27A, EIF2S3, RAN, SART1, EIF4B, RPS25
regulation of cell death	0.00886296	GO:0010941	20	11.343	1460	PARK7, NME1, TIMP1, CDK1, HMGB1, ANXA1, GSTP1, YWHAE, RPS27A, CLU, ARHGDIA, GLO1, YWHAQ, HYOU1, EEF1E1, HSP90B1, HMGB2, HSPA5, ARF4, PRDX2
response to oxygen-containing compound	0.00892701	GO:1901700	20	11.3508	1461	PARK7, NME1, EZR, TIMP1, CDK1, ANXA1, GSTP1, JUP, AKR1B1, MSN, GGH, PRDX1, CDK2, HSP90B1, HMGB2, DSG1, PRDX6, PKM, EEF2, PRDX2
aspartate family amino acid metabolic process	0.00895621	GO:0009066	3	0.427307	55	AHCY, MTHFD1, PHGDH
gliogenesis	0.00899197	GO:0042063	6	1.77915	229	CDK1, ANXA1, GSTP1, CLU, PHGDH, EEF2
DNA damage response, signal transduction by p53 class mediator	0.00908968	GO:0030330	4	0.815767	105	CDK1, RPS27A, CDK2, EEF1E1
regulation of cellular localization	0.00927363	GO:0060341	13	6.2076	799	PARK7, EZR, RUVBL1, CDK1, JUP, PSMB7, YWHAE, MSN, HSP90AA1, YWHAQ, FKBP1A, PRDX1, CCT7
regulation of cellular protein metabolic process	0.00927374	GO:0032268	28	17.8226	2294	PARK7, EZR, TIMP1, PEBP1, PSMA7, CDK1, HMGB1, GSTP1, PPIB, PSMB7, KRT17, YWHAE, RPS27A, RAN, CLU, MSN, HSP90AA1, EIF4B, FKBP1A, SUMO2, PRDX1, CDK2, HSP90B1, GAPDH, HSPA5, EEF2, UCHL1, DTD1
positive regulation of mitochondrion organization	0.00934802	GO:0010822	5	1.28192	165	PARK7, RUVBL1, PSMB7, YWHAE, YWHAQ
estrous cycle	0.00939327	GO:0044849	2	0.147615	19	ANXA1, CLU
DNA ligation	0.00939327	GO:0006266	2	0.147615	19	HMGB1, HMGB2
negative regulation of endoplasmic reticulum stress-induced intrinsic apoptotic signaling pathway	0.00939327	GO:1902236	2	0.147615	19	PARK7, HYOU1
apoptotic DNA fragmentation	0.00939327	GO:0006309	2	0.147615	19	HMGB1, HMGB2
regulation of cardiac muscle cell action potential	0.00939327	GO:0098901	2	0.147615	19	JUP, DSP
amyloid precursor protein catabolic process	0.00939327	GO:0042987	2	0.147615	19	CLU, FKBP1A
regulation of intracellular transport	0.00963504	GO:0032386	9	3.56607	459	PARK7, EZR, RUVBL1, CDK1, JUP, PSMB7, MSN, HSP90AA1, PRDX1
cell migration	0.00963648	GO:0016477	17	9.14436	1177	TIMP1, CDK1, HMGB1, ANXA1, PPIA, PRCP, JUP, KRT2, SLC3A2, YWHAE, MSN, HSP90AA1, KRT16, VCL, HMGB2, HSPA5, ARF4
monocarboxylic acid metabolic process	0.0097125	GO:0032787	10	4.21091	542	PARK7, TPI1, ANXA1, PGK1, GLO1, LDHB, PGAM1, GAPDH, PKM, ENO1
peptidyl-proline modification	0.00987753	GO:0018208	3	0.442845	57	PPIA, PPIB, FKBP1A
regulation of interleukin-1 production	0.00987753	GO:0032652	3	0.442845	57	HMGB1, ANXA1, GSTP1
protein modification by small protein conjugation or removal	0.0099892	GO:0070647	15	7.69929	991	PARK7, PSMA7, CDK1, PSMB7, RPS27A, CLU, HSP90AA1, FKBP1A, SUMO2, UBA1, UBE2NL, CDK2, PCNP, HSPA5, UCHL1
