# Supplementary material for: Cell-based HTS identifies a chemical chaperone for preventing ER protein aggregation and proteotoxicity
Source: eLife journal article supplement (doi:10.7554/elife.43302), 2019-12-16
Supplement: supp [file elife-43302-supp-v1.zip › elife_poa_e43302_Figure_6_figure_supplement_1_source_data_1.xlsx]

## Sheet: Figure 6 Supplement 1A
GO-Term	P-value	GO-Term id	# Genes (observed)	# Genes (expected)	# Genes (total)	List of observed genes
extracellular exosome	2.69055e-32	GO:0070062	55	10.6748	2764	GSTP1, LDHB, HSP90B1, RAN, CTSD, MTHFD1, YWHAQ, HYOU1, PEBP1, GGH, TAGLN2, ST13, YWHAE, ARF4, PRCP, PHGDH, PPIA, PKM, TPI1, RPS25, RPS27A, SNRPB, SMC2, KRT17, KRT10, TUBB2A, JUP, HSP90AA1, DSP, MSN, UCHL1, CCT7, EEF2, RUVBL1, AKR1B1, PPIB, PAICS, CLU, PCMT1, CDK1, RPL27, KRT2, ENO1, AHCY, GANAB, EZR, FLNB, CHID1, ARF3, TARS, EIF2S3, PSMA7, PGK1, ALYREF, ANXA1
extracellular vesicle	3.45068e-32	GO:1903561	55	10.725	2777	GSTP1, LDHB, HSP90B1, RAN, CTSD, MTHFD1, YWHAQ, HYOU1, PEBP1, GGH, TAGLN2, ST13, YWHAE, ARF4, PRCP, PHGDH, PPIA, PKM, TPI1, RPS25, RPS27A, SNRPB, SMC2, KRT17, KRT10, TUBB2A, JUP, HSP90AA1, DSP, MSN, UCHL1, CCT7, EEF2, RUVBL1, AKR1B1, PPIB, PAICS, CLU, PCMT1, CDK1, RPL27, KRT2, ENO1, AHCY, GANAB, EZR, FLNB, CHID1, ARF3, TARS, EIF2S3, PSMA7, PGK1, ALYREF, ANXA1
extracellular organelle	3.51718e-32	GO:0043230	55	10.7289	2778	GSTP1, LDHB, HSP90B1, RAN, CTSD, MTHFD1, YWHAQ, HYOU1, PEBP1, GGH, TAGLN2, ST13, YWHAE, ARF4, PRCP, PHGDH, PPIA, PKM, TPI1, RPS25, RPS27A, SNRPB, SMC2, KRT17, KRT10, TUBB2A, JUP, HSP90AA1, DSP, MSN, UCHL1, CCT7, EEF2, RUVBL1, AKR1B1, PPIB, PAICS, CLU, PCMT1, CDK1, RPL27, KRT2, ENO1, AHCY, GANAB, EZR, FLNB, CHID1, ARF3, TARS, EIF2S3, PSMA7, PGK1, ALYREF, ANXA1
extracellular region part	6.98027e-29	GO:0044421	58	14.5716	3773	GSTP1, LDHB, HSP90B1, RAN, CTSD, MTHFD1, YWHAQ, HYOU1, PEBP1, GGH, TAGLN2, ST13, YWHAE, ARF4, PRCP, PHGDH, PPIA, PKM, TPI1, RPS25, HMGB1, HMGB2, RPS27A, SNRPB, SMC2, KRT17, KRT10, TUBB2A, JUP, HSP90AA1, DSP, MSN, UCHL1, CCT7, EEF2, RUVBL1, AKR1B1, PPIB, PAICS, CLU, YARS, PCMT1, CDK1, RPL27, KRT2, ENO1, AHCY, GANAB, EZR, FLNB, CHID1, ARF3, TARS, EIF2S3, PSMA7, PGK1, ALYREF, ANXA1
membrane-bounded vesicle	1.25218e-26	GO:0031988	55	13.6834	3543	GSTP1, LDHB, HSP90B1, RAN, CTSD, MTHFD1, YWHAQ, HYOU1, PEBP1, GGH, TAGLN2, ST13, YWHAE, ARF4, PRCP, PHGDH, PPIA, PKM, TPI1, RPS25, RPS27A, SNRPB, SMC2, KRT17, KRT10, TUBB2A, JUP, HSP90AA1, DSP, MSN, UCHL1, CCT7, EEF2, RUVBL1, AKR1B1, PPIB, PAICS, CLU, PCMT1, CDK1, RPL27, KRT2, ENO1, AHCY, GANAB, EZR, FLNB, CHID1, ARF3, TARS, EIF2S3, PSMA7, PGK1, ALYREF, ANXA1
vesicle	8.3754e-26	GO:0031982	55	14.1932	3675	GSTP1, LDHB, HSP90B1, RAN, CTSD, MTHFD1, YWHAQ, HYOU1, PEBP1, GGH, TAGLN2, ST13, YWHAE, ARF4, PRCP, PHGDH, PPIA, PKM, TPI1, RPS25, RPS27A, SNRPB, SMC2, KRT17, KRT10, TUBB2A, JUP, HSP90AA1, DSP, MSN, UCHL1, CCT7, EEF2, RUVBL1, AKR1B1, PPIB, PAICS, CLU, PCMT1, CDK1, RPL27, KRT2, ENO1, AHCY, GANAB, EZR, FLNB, CHID1, ARF3, TARS, EIF2S3, PSMA7, PGK1, ALYREF, ANXA1
extracellular region	1.20757e-24	GO:0005576	58	17.391	4503	GSTP1, LDHB, HSP90B1, RAN, CTSD, MTHFD1, YWHAQ, HYOU1, PEBP1, GGH, TAGLN2, ST13, YWHAE, ARF4, PRCP, PHGDH, PPIA, PKM, TPI1, RPS25, HMGB1, HMGB2, RPS27A, SNRPB, SMC2, KRT17, KRT10, TUBB2A, JUP, HSP90AA1, DSP, MSN, UCHL1, CCT7, EEF2, RUVBL1, AKR1B1, PPIB, PAICS, CLU, YARS, PCMT1, CDK1, RPL27, KRT2, ENO1, AHCY, GANAB, EZR, FLNB, CHID1, ARF3, TARS, EIF2S3, PSMA7, PGK1, ALYREF, ANXA1
cytosol	3.70949e-15	GO:0005829	43	13.2083	3420	GSTP1, LDHB, HSP90B1, RAN, MTHFD1, YWHAQ, EEF1D, PEBP1, GGH, ST13, YWHAE, ARF4, PHGDH, PPIA, PKM, TPI1, RPS25, CDK2, RPS27A, SNRPB, SMC2, JUP, HSP90AA1, UCHL1, CCT7, EEF2, SART1, AKR1B1, PAICS, CLU, YARS, PCMT1, CDK1, RPL27, ENO1, AHCY, EZR, FLNB, TARS, EIF2S3, PSMA7, PGK1, ALYREF
cytoplasm	1.41152e-13	GO:0005737	67	40.5982	10512	GSTP1, PSPC1, LDHB, HSP90B1, RAN, CTSD, MTHFD1, YWHAQ, HYOU1, EEF1D, PEBP1, GGH, ST13, YWHAE, ARF4, PRCP, PHGDH, PPIA, PKM, TPI1, RPS25, OAT, STIP1, CDK2, HMGB1, HMGB2, RPS27A, SNRPB, SMC2, KRT17, KRT10, TUBB2A, JUP, HSP90AA1, DSP, MSN, UCHL1, CCT7, EEF2, SART1, RUVBL1, AKR1B1, PPIB, PAICS, TMPO, CLU, YARS, PCMT1, CNN3, DHX15, SF1, CDK1, RPL27, KRT2, ENO1, AHCY, GANAB, EZR, FLNB, CHID1, ARF3, TAR…
cytoplasmic part	1.81576e-13	GO:0044444	60	30.5645	7914	GSTP1, LDHB, HSP90B1, RAN, CTSD, MTHFD1, YWHAQ, HYOU1, EEF1D, PEBP1, GGH, ST13, YWHAE, ARF4, PRCP, PHGDH, PPIA, PKM, TPI1, RPS25, OAT, STIP1, CDK2, HMGB1, HMGB2, RPS27A, SNRPB, SMC2, JUP, HSP90AA1, MSN, UCHL1, CCT7, EEF2, SART1, RUVBL1, AKR1B1, PPIB, PAICS, TMPO, CLU, YARS, PCMT1, SF1, CDK1, RPL27, KRT2, ENO1, AHCY, GANAB, EZR, FLNB, CHID1, ARF3, TARS, EIF2S3, PSMA7, PGK1, ALYREF, ANXA1
membrane-bounded organelle	2.22702e-11	GO:0043227	68	45.9781	11905	GSTP1, PSPC1, LDHB, HSP90B1, RAN, CTSD, MTHFD1, YWHAQ, HYOU1, EEF1D, PEBP1, GGH, TAGLN2, ST13, YWHAE, SSB, ARF4, PRCP, PHGDH, PPIA, PKM, TPI1, RPS25, OAT, STIP1, CDK2, HMGB1, HMGB2, RPS27A, SNRPB, SMC2, KRT17, KRT10, TUBB2A, JUP, HSP90AA1, DSP, MSN, UCHL1, CCT7, EEF2, SART1, RUVBL1, AKR1B1, PPIB, PAICS, TMPO, CLU, YARS, PCMT1, DHX15, SF1, CDK1, RPL27, KRT2, ENO1, AHCY, GANAB, EZR, FLNB, CHID1, AR…
organelle	9.87075e-11	GO:0043226	69	49.4501	12804	GSTP1, PSPC1, LDHB, HSP90B1, RAN, CTSD, MTHFD1, YWHAQ, HYOU1, EEF1D, PEBP1, GGH, TAGLN2, ST13, YWHAE, SSB, ARF4, PRCP, PHGDH, PPIA, PKM, TPI1, RPS25, OAT, STIP1, CDK2, HMGB1, HMGB2, RPS27A, SNRPB, SMC2, KRT17, KRT10, TUBB2A, JUP, HSP90AA1, DSP, MSN, UCHL1, CCT7, EEF2, SART1, RUVBL1, AKR1B1, PPIB, PAICS, TMPO, CLU, YARS, PCMT1, CNN3, DHX15, SF1, CDK1, RPL27, KRT2, ENO1, AHCY, GANAB, EZR, FLNB, CHI…
pigment granule	2.09712e-10	GO:0048770	9	0.397795	103	HSP90B1, RAN, CTSD, GGH, YWHAE, HSP90AA1, PPIB, AHCY, GANAB
melanosome	2.09712e-10	GO:0042470	9	0.397795	103	HSP90B1, RAN, CTSD, GGH, YWHAE, HSP90AA1, PPIB, AHCY, GANAB
myelin sheath	8.70905e-10	GO:0043209	10	0.64883	168	LDHB, PHGDH, PKM, STIP1, HSP90AA1, MSN, UCHL1, AKR1B1, ENO1, EZR
adherens junction	2.51339e-09	GO:0005912	14	1.81132	469	HSP90B1, YWHAQ, HYOU1, YWHAE, PPIA, JUP, DSP, MSN, PPIB, CNN3, RPL27, EZR, FLNB, ANXA1
focal adhesion	2.76208e-09	GO:0005925	13	1.51008	391	HSP90B1, YWHAQ, HYOU1, YWHAE, PPIA, JUP, MSN, PPIB, CNN3, RPL27, EZR, FLNB, ANXA1
cell-substrate adherens junction	3.02837e-09	GO:0005924	13	1.52166	394	HSP90B1, YWHAQ, HYOU1, YWHAE, PPIA, JUP, MSN, PPIB, CNN3, RPL27, EZR, FLNB, ANXA1
cell-substrate junction	3.41966e-09	GO:0030055	13	1.53711	398	HSP90B1, YWHAQ, HYOU1, YWHAE, PPIA, JUP, MSN, PPIB, CNN3, RPL27, EZR, FLNB, ANXA1
anchoring junction	4.28754e-09	GO:0070161	14	1.88856	489	HSP90B1, YWHAQ, HYOU1, YWHAE, PPIA, JUP, DSP, MSN, PPIB, CNN3, RPL27, EZR, FLNB, ANXA1
intracellular part	1.02985e-07	GO:0044424	68	52.281	13537	GSTP1, PSPC1, LDHB, HSP90B1, RAN, CTSD, MTHFD1, YWHAQ, HYOU1, EEF1D, PEBP1, GGH, ST13, YWHAE, SSB, ARF4, PRCP, PHGDH, PPIA, PKM, TPI1, RPS25, OAT, STIP1, CDK2, HMGB1, HMGB2, RPS27A, SNRPB, SMC2, KRT17, KRT10, TUBB2A, JUP, HSP90AA1, DSP, MSN, UCHL1, CCT7, EEF2, SART1, RUVBL1, AKR1B1, PPIB, PAICS, TMPO, CLU, YARS, PCMT1, CNN3, DHX15, SF1, CDK1, RPL27, KRT2, ENO1, AHCY, GANAB, EZR, FLNB, CHID1, ARF3…
intracellular organelle	1.43161e-07	GO:0043229	64	45.4413	11766	GSTP1, PSPC1, LDHB, HSP90B1, RAN, CTSD, MTHFD1, YWHAQ, HYOU1, EEF1D, PEBP1, GGH, YWHAE, SSB, ARF4, PRCP, PPIA, PKM, TPI1, RPS25, OAT, STIP1, CDK2, HMGB1, HMGB2, RPS27A, SNRPB, SMC2, KRT17, KRT10, TUBB2A, JUP, HSP90AA1, DSP, MSN, UCHL1, CCT7, EEF2, SART1, RUVBL1, AKR1B1, PPIB, TMPO, CLU, YARS, PCMT1, CNN3, DHX15, SF1, CDK1, RPL27, KRT2, ENO1, AHCY, GANAB, EZR, FLNB, CHID1, ARF3, TARS, EIF2S3, PSMA…
intracellular	5.26914e-07	GO:0005622	68	53.6135	13882	GSTP1, PSPC1, LDHB, HSP90B1, RAN, CTSD, MTHFD1, YWHAQ, HYOU1, EEF1D, PEBP1, GGH, ST13, YWHAE, SSB, ARF4, PRCP, PHGDH, PPIA, PKM, TPI1, RPS25, OAT, STIP1, CDK2, HMGB1, HMGB2, RPS27A, SNRPB, SMC2, KRT17, KRT10, TUBB2A, JUP, HSP90AA1, DSP, MSN, UCHL1, CCT7, EEF2, SART1, RUVBL1, AKR1B1, PPIB, PAICS, TMPO, CLU, YARS, PCMT1, CNN3, DHX15, SF1, CDK1, RPL27, KRT2, ENO1, AHCY, GANAB, EZR, FLNB, CHID1, ARF3…
nucleus	5.61118e-07	GO:0005634	47	26.5402	6872	GSTP1, PSPC1, HSP90B1, RAN, EEF1D, PEBP1, GGH, SSB, PPIA, PKM, TPI1, RPS25, STIP1, CDK2, HMGB1, HMGB2, RPS27A, SNRPB, SMC2, KRT10, TUBB2A, JUP, HSP90AA1, DSP, MSN, UCHL1, EEF2, SART1, RUVBL1, AKR1B1, PPIB, TMPO, CLU, YARS, DHX15, SF1, CDK1, RPL27, KRT2, ENO1, AHCY, EZR, CHID1, EIF2S3, PSMA7, ALYREF, ANXA1
intracellular membrane-bounded organelle	1.00484e-06	GO:0043231	60	41.5097	10748	GSTP1, PSPC1, LDHB, HSP90B1, RAN, CTSD, MTHFD1, YWHAQ, HYOU1, EEF1D, PEBP1, GGH, YWHAE, SSB, ARF4, PRCP, PPIA, PKM, TPI1, RPS25, OAT, STIP1, CDK2, HMGB1, HMGB2, RPS27A, SNRPB, SMC2, KRT10, TUBB2A, JUP, HSP90AA1, DSP, MSN, UCHL1, CCT7, EEF2, SART1, RUVBL1, AKR1B1, PPIB, TMPO, CLU, YARS, PCMT1, DHX15, SF1, CDK1, RPL27, KRT2, ENO1, AHCY, GANAB, EZR, CHID1, ARF3, EIF2S3, PSMA7, ALYREF, ANXA1
extracellular space	2.74389e-06	GO:0005615	18	5.26016	1362	GSTP1, CTSD, GGH, PPIA, TPI1, HMGB1, HMGB2, RPS27A, KRT10, MSN, AKR1B1, CLU, YARS, KRT2, ENO1, EZR, CHID1, ANXA1
intracellular non-membrane-bounded organelle	3.49457e-06	GO:0043232	32	14.815	3836	PSPC1, RAN, EEF1D, YWHAE, SSB, RPS25, CDK2, HMGB1, HMGB2, RPS27A, SMC2, KRT17, KRT10, TUBB2A, JUP, DSP, MSN, CCT7, EEF2, RUVBL1, TMPO, CNN3, DHX15, SF1, CDK1, RPL27, KRT2, ENO1, EZR, FLNB, TARS, ALYREF
non-membrane-bounded organelle	3.49457e-06	GO:0043228	32	14.815	3836	PSPC1, RAN, EEF1D, YWHAE, SSB, RPS25, CDK2, HMGB1, HMGB2, RPS27A, SMC2, KRT17, KRT10, TUBB2A, JUP, DSP, MSN, CCT7, EEF2, RUVBL1, TMPO, CNN3, DHX15, SF1, CDK1, RPL27, KRT2, ENO1, EZR, FLNB, TARS, ALYREF
macromolecular complex	7.15084e-06	GO:0032991	35	17.727	4590	GSTP1, HSP90B1, RAN, YWHAQ, HYOU1, EEF1D, ST13, YWHAE, SSB, RPS25, STIP1, CDK2, HMGB1, HMGB2, RPS27A, SNRPB, SMC2, JUP, HSP90AA1, CCT7, EEF2, SART1, RUVBL1, PPIB, TMPO, CLU, DHX15, SF1, RPL27, ENO1, GANAB, EZR, PSMA7, ALYREF, ANXA1
endoplasmic reticulum chaperone complex	8.89723e-06	GO:0034663	3	0.0424829	11	HSP90B1, HYOU1, PPIB
cell junction	2.61983e-05	GO:0030054	15	4.44526	1151	HSP90B1, YWHAQ, HYOU1, YWHAE, PPIA, JUP, DSP, MSN, AKR1B1, PPIB, CNN3, RPL27, EZR, FLNB, ANXA1
endocytic vesicle lumen	3.60642e-05	GO:0071682	3	0.0656554	17	HSP90B1, HYOU1, HSP90AA1
Schwann cell microvillus	4.39356e-05	GO:0097454	2	0.0115863	3	AKR1B1, EZR
cytoplasmic, membrane-bounded vesicle	0.000108298	GO:0016023	14	4.44912	1152	HSP90B1, RAN, CTSD, YWHAQ, HYOU1, GGH, YWHAE, RPS27A, HSP90AA1, PPIB, CLU, AHCY, GANAB, ANXA1
cytoplasmic vesicle	0.000258865	GO:0031410	14	4.83533	1252	HSP90B1, RAN, CTSD, YWHAQ, HYOU1, GGH, YWHAE, RPS27A, HSP90AA1, PPIB, CLU, AHCY, GANAB, ANXA1
intracellular vesicle	0.000263156	GO:0097708	14	4.84305	1254	HSP90B1, RAN, CTSD, YWHAQ, HYOU1, GGH, YWHAE, RPS27A, HSP90AA1, PPIB, CLU, AHCY, GANAB, ANXA1
organelle lumen	0.000298803	GO:0043233	30	16.5992	4298	PSPC1, HSP90B1, RAN, CTSD, HYOU1, EEF1D, SSB, RPS25, OAT, CDK2, HMGB1, HMGB2, RPS27A, SNRPB, SMC2, HSP90AA1, UCHL1, SART1, RUVBL1, AKR1B1, PPIB, CLU, DHX15, SF1, CDK1, GANAB, EZR, PSMA7, ALYREF, ANXA1
membrane-enclosed lumen	0.000378044	GO:0031974	30	16.8117	4353	PSPC1, HSP90B1, RAN, CTSD, HYOU1, EEF1D, SSB, RPS25, OAT, CDK2, HMGB1, HMGB2, RPS27A, SNRPB, SMC2, HSP90AA1, UCHL1, SART1, RUVBL1, AKR1B1, PPIB, CLU, DHX15, SF1, CDK1, GANAB, EZR, PSMA7, ALYREF, ANXA1
intracellular ribonucleoprotein complex	0.000443426	GO:0030529	10	2.80001	725	SSB, RPS25, RPS27A, SNRPB, EEF2, SART1, DHX15, SF1, RPL27, ALYREF
ribonucleoprotein complex	0.000443426	GO:1990904	10	2.80001	725	SSB, RPS25, RPS27A, SNRPB, EEF2, SART1, DHX15, SF1, RPL27, ALYREF
spliceosomal complex	0.000519161	GO:0005681	5	0.660416	171	SNRPB, SART1, DHX15, SF1, ALYREF
intracellular organelle lumen	0.000544866	GO:0070013	29	16.3134	4224	PSPC1, HSP90B1, RAN, CTSD, HYOU1, EEF1D, SSB, RPS25, OAT, CDK2, HMGB1, HMGB2, RPS27A, SNRPB, SMC2, HSP90AA1, UCHL1, SART1, RUVBL1, AKR1B1, PPIB, DHX15, SF1, CDK1, GANAB, EZR, PSMA7, ALYREF, ANXA1
fascia adherens	0.000648369	GO:0005916	2	0.0386208	10	JUP, DSP
cytoplasmic membrane-bounded vesicle lumen	0.000700593	GO:0060205	4	0.401657	104	HSP90B1, HYOU1, HSP90AA1, CLU
perinuclear region of cytoplasm	0.000730276	GO:0048471	9	2.45629	636	HSP90B1, HMGB2, HSP90AA1, MSN, AKR1B1, PPIB, CLU, EZR, ARF3
vesicle lumen	0.000752536	GO:0031983	4	0.409381	106	HSP90B1, HYOU1, HSP90AA1, CLU
organelle part	0.000851688	GO:0044422	45	31.5571	8171	PSPC1, HSP90B1, RAN, CTSD, YWHAQ, HYOU1, EEF1D, YWHAE, SSB, RPS25, OAT, CDK2, HMGB1, HMGB2, RPS27A, SNRPB, SMC2, KRT17, KRT10, TUBB2A, JUP, HSP90AA1, DSP, UCHL1, CCT7, SART1, RUVBL1, AKR1B1, PPIB, TMPO, CLU, DHX15, SF1, CDK1, RPL27, KRT2, ENO1, GANAB, EZR, FLNB, CHID1, ARF3, PSMA7, ALYREF, ANXA1
cell trailing edge	0.000946166	GO:0031254	2	0.046345	12	MSN, EZR
uropod	0.000946166	GO:0001931	2	0.046345	12	MSN, EZR
intermediate filament	0.00096088	GO:0005882	5	0.756969	196	KRT17, KRT10, JUP, DSP, KRT2
supramolecular fiber	0.000990298	GO:0099512	9	2.56442	664	KRT17, KRT10, TUBB2A, JUP, DSP, CCT7, CDK1, KRT2, EZR
polymeric cytoskeletal fiber	0.000990298	GO:0099513	9	2.56442	664	KRT17, KRT10, TUBB2A, JUP, DSP, CCT7, CDK1, KRT2, EZR
intracellular organelle part	0.00109219	GO:0044446	44	30.8542	7989	PSPC1, HSP90B1, RAN, CTSD, YWHAQ, HYOU1, EEF1D, YWHAE, SSB, RPS25, OAT, CDK2, HMGB1, HMGB2, RPS27A, SNRPB, SMC2, KRT17, KRT10, TUBB2A, JUP, HSP90AA1, DSP, UCHL1, CCT7, SART1, RUVBL1, AKR1B1, PPIB, TMPO, CLU, DHX15, SF1, CDK1, RPL27, KRT2, GANAB, EZR, FLNB, CHID1, ARF3, PSMA7, ALYREF, ANXA1
cytoskeleton	0.00122544	GO:0005856	17	7.69713	1993	RAN, YWHAE, CDK2, KRT17, KRT10, TUBB2A, JUP, DSP, MSN, CCT7, RUVBL1, CNN3, CDK1, KRT2, EZR, FLNB, TARS
cytoskeletal part	0.0012814	GO:0044430	14	5.67726	1470	RAN, YWHAE, CDK2, KRT17, KRT10, TUBB2A, JUP, DSP, CCT7, RUVBL1, CDK1, KRT2, EZR, FLNB
basolateral plasma membrane	0.00130603	GO:0016323	5	0.811038	210	HSP90AA1, DSP, MSN, EZR, ANXA1
glial cell projection	0.00149419	GO:0097386	2	0.0579313	15	AKR1B1, EZR
vacuole	0.00171095	GO:0005773	12	4.5534	1179	RAN, CTSD, GGH, PRCP, CDK2, HMGB1, RPS27A, HSP90AA1, AKR1B1, EZR, CHID1, ANXA1
cytosolic part	0.00176954	GO:0044445	5	0.868969	225	RPS25, RPS27A, CCT7, RPL27, ENO1
protein complex	0.00190123	GO:0043234	26	15.0235	3890	GSTP1, HSP90B1, RAN, YWHAQ, HYOU1, EEF1D, ST13, YWHAE, STIP1, CDK2, HMGB1, HMGB2, SNRPB, SMC2, JUP, HSP90AA1, CCT7, RUVBL1, PPIB, CLU, ENO1, GANAB, EZR, PSMA7, ALYREF, ANXA1
ribosome	0.00191127	GO:0005840	5	0.884417	229	RPS25, RPS27A, EEF2, SF1, RPL27
chromosome	0.00198734	GO:0005694	10	3.41022	883	RAN, SSB, CDK2, HMGB1, HMGB2, SMC2, RUVBL1, TMPO, CDK1, ALYREF
cytoplasmic vesicle part	0.00217301	GO:0044433	8	2.32497	602	HSP90B1, YWHAQ, HYOU1, YWHAE, RPS27A, HSP90AA1, CLU, ANXA1
intermediate filament cytoskeleton	0.00230185	GO:0045111	5	0.923038	239	KRT17, KRT10, JUP, DSP, KRT2
microvillus membrane	0.00240924	GO:0031528	2	0.0733796	19	MSN, EZR
extrinsic component of membrane	0.00294246	GO:0019898	5	0.977107	253	JUP, MSN, ENO1, EZR, ANXA1
mast cell granule	0.002944	GO:0042629	2	0.0811038	21	AKR1B1, ANXA1
chromosomal part	0.00298361	GO:0044427	9	3.01243	780	RAN, SSB, CDK2, HMGB2, SMC2, RUVBL1, TMPO, CDK1, ALYREF
microvillus	0.00305183	GO:0005902	3	0.289656	75	MSN, AKR1B1, EZR
U4/U6 x U5 tri-snRNP complex	0.00323034	GO:0046540	2	0.0849659	22	SNRPB, SART1
chromosome, telomeric region	0.00356325	GO:0000781	4	0.625658	162	SSB, CDK2, CDK1, ALYREF
ruffle membrane	0.00366265	GO:0032587	3	0.308967	80	ARF4, HSP90AA1, EZR
desmosome	0.00384045	GO:0030057	2	0.09269	24	JUP, DSP
cell part	0.00390823	GO:0044464	68	61.7856	15998	GSTP1, PSPC1, LDHB, HSP90B1, RAN, CTSD, MTHFD1, YWHAQ, HYOU1, EEF1D, PEBP1, GGH, ST13, YWHAE, SSB, ARF4, PRCP, PHGDH, PPIA, PKM, TPI1, RPS25, OAT, STIP1, CDK2, HMGB1, HMGB2, RPS27A, SNRPB, SMC2, KRT17, KRT10, TUBB2A, JUP, HSP90AA1, DSP, MSN, UCHL1, CCT7, EEF2, SART1, RUVBL1, AKR1B1, PPIB, PAICS, TMPO, CLU, YARS, PCMT1, CNN3, DHX15, SF1, CDK1, RPL27, KRT2, ENO1, AHCY, GANAB, EZR, FLNB, CHID1, ARF3…
nuclear part	0.00401092	GO:0044428	25	14.9656	3875	PSPC1, RAN, EEF1D, SSB, RPS25, CDK2, HMGB1, HMGB2, RPS27A, SNRPB, SMC2, JUP, HSP90AA1, UCHL1, SART1, RUVBL1, AKR1B1, TMPO, DHX15, SF1, CDK1, EZR, PSMA7, ALYREF, ANXA1
lytic vacuole	0.00406793	GO:0000323	7	2.02759	525	CTSD, GGH, PRCP, HSP90AA1, AKR1B1, CHID1, ANXA1
lysosome	0.00406793	GO:0005764	7	2.02759	525	CTSD, GGH, PRCP, HSP90AA1, AKR1B1, CHID1, ANXA1
cell	0.00432077	GO:0005623	68	61.8899	16025	GSTP1, PSPC1, LDHB, HSP90B1, RAN, CTSD, MTHFD1, YWHAQ, HYOU1, EEF1D, PEBP1, GGH, ST13, YWHAE, SSB, ARF4, PRCP, PHGDH, PPIA, PKM, TPI1, RPS25, OAT, STIP1, CDK2, HMGB1, HMGB2, RPS27A, SNRPB, SMC2, KRT17, KRT10, TUBB2A, JUP, HSP90AA1, DSP, MSN, UCHL1, CCT7, EEF2, SART1, RUVBL1, AKR1B1, PPIB, PAICS, TMPO, CLU, YARS, PCMT1, CNN3, DHX15, SF1, CDK1, RPL27, KRT2, ENO1, AHCY, GANAB, EZR, FLNB, CHID1, ARF3…
U12-type spliceosomal complex	0.00449981	GO:0005689	2	0.100414	26	SNRPB, DHX15
spliceosomal tri-snRNP complex	0.00484772	GO:0097526	2	0.104276	27	SNRPB, SART1
membrane raft	0.00487873	GO:0045121	5	1.10069	285	LDHB, CTSD, EEF2, EZR, PGK1
catalytic step 2 spliceosome	0.0049392	GO:0071013	3	0.343726	89	SNRPB, SART1, ALYREF
membrane microdomain	0.0049509	GO:0098857	5	1.10456	286	LDHB, CTSD, EEF2, EZR, PGK1
nuclear lumen	0.00498103	GO:0031981	23	13.5327	3504	PSPC1, RAN, EEF1D, SSB, RPS25, CDK2, HMGB1, HMGB2, RPS27A, SNRPB, SMC2, HSP90AA1, UCHL1, SART1, RUVBL1, AKR1B1, DHX15, SF1, CDK1, EZR, PSMA7, ALYREF, ANXA1
nucleolus	0.00500648	GO:0005730	9	3.2596	844	PSPC1, RAN, EEF1D, RPS25, HMGB2, RPS27A, SMC2, DHX15, EZR
U2-type spliceosomal complex	0.00635862	GO:0005684	2	0.119725	31	SNRPB, DHX15
smooth endoplasmic reticulum	0.00676569	GO:0005790	2	0.123587	32	HYOU1, PPIB
condensed chromosome	0.00696935	GO:0000793	4	0.756969	196	CDK2, HMGB1, HMGB2, SMC2
cell projection	0.00699977	GO:0042995	14	6.83589	1770	RAN, YWHAE, ARF4, PKM, HMGB1, HSP90AA1, MSN, UCHL1, AKR1B1, CLU, CNN3, AHCY, EZR, ANXA1
brush border	0.00701377	GO:0005903	3	0.390071	101	HSP90AA1, EZR, FLNB
endoplasmic reticulum lumen	0.00747431	GO:0005788	4	0.772417	200	HSP90B1, HYOU1, PPIB, GANAB
aggresome	0.00761439	GO:0016235	2	0.131311	34	EEF2, CLU
RNA nuclear export complex	0.00769477	GO:0042565	1	0.00772417	2	RAN
TRAF2-GSTP1 complex	0.00769477	GO:0097057	1	0.00772417	2	GSTP1
Y chromosome	0.00769477	GO:0000806	1	0.00772417	2	CDK2
cytoplasmic side of apical plasma membrane	0.00769477	GO:0098592	1	0.00772417	2	EZR
