# Supplementary material for: Cell-based HTS identifies a chemical chaperone for preventing ER protein aggregation and proteotoxicity
Source: eLife journal article supplement (doi:10.7554/elife.43302), 2019-12-16
Supplement: supp [file elife-43302-supp-v1.zip › elife_poa_e43302_Figure_6_figure_supplement_1_source_data_2.xlsx]

## Sheet: Figure 6 Supplement 1B
GO-Term	P-value	GO-Term id	# Genes (observed)	# Genes (expected)	# Genes (total)	List of observed genes
cytosol	5.99383e-135	GO:0005829	594	229.71	3420	LDHB, SPTBN1, LDHA, SRP54, PARN, AK2, RSL1D1, FARSA, SPTBN2, GAPVD1, SRM, XPO1, PDLIM5, HARS, NAXE, DNAJA3, RPL13, UBE2M, RPL13A, TYMS, PSMD3, DDX6, PPP2R1A, CAPN1, RPS14, ATP6V1B2, GNAS, EZR, IPO7, YWHAB, HSP90AB1, SEH1L, RPL26, IDH2, PSMB2, ARHGAP1, PRMT5, YARS2, CAPZB, IMPDH2, SEC31A, PTPN11, G3BP1, PLEC, GSPT1, USP9X, HNRNPD, CAPNS1, IPO9, PSMD14, CKAP5, RPS6KA3, GSTP1, COPB2, AARS, PSMD11, E…
cytoplasm	8.85845e-128	GO:0005737	1071	706.056	10512	LDHB, SPTBN1, LDHA, SRP54, TIMM44, PARN, ANXA3, AK2, RSL1D1, FARSA, PDHA1, ARF5, SPTBN2, GAPVD1, IPO5, SRM, XPO1, PDLIM5, DECR1, EIF2A, HARS, TIMM50, NDUFC2, YME1L1, NDRG3, HADHA, DARS2, NAXE, KRT2, MYO1B, DNAJA3, TRMT6, RPL13, UBE2M, RPL13A, TYMS, PSMD3, DDX6, PPP2R1A, CAPN1, RPS14, HSD17B12, SLIRP, ATP6V1B2, GNAS, AGPS, EZR, FUBP3, IPO7, TXNL1, YWHAB, COASY, HSP90AB1, SEH1L, GLUD1, RPL26, IDH2,…
intracellular organelle part	1.01364e-125	GO:0044446	928	536.595	7989	SPTBN1, SSB, RBMX, SRP54, TIMM44, PARN, ANXA3, AK2, RSL1D1, PDHA1, SPTBN2, IPO5, XPO1, DECR1, TIMM50, NDUFC2, YME1L1, HADHA, DARS2, NAXE, KRT2, MYO1B, DNAJA3, TRMT6, RPL13, POP1, RPL13A, TYMS, PSMD3, PPP2R1A, RPS14, HSD17B12, ATP6V1B2, AGPS, EZR, IPO7, SNRNP200, YWHAB, COASY, HSP90AB1, SEH1L, GLUD1, TRIM28, RPL26, IDH2, PSMB2, TUBA1C, PRMT5, YARS2, CAPZB, IMPDH2, SEC31A, CFAP20, SRSF2, KIF5B, HNR…
extracellular exosome	1.76499e-123	GO:0070062	513	185.649	2764	LDHB, SPTBN1, LDHA, RBMX, ANXA3, AK2, ARF5, DECR1, NDRG3, NAXE, KRT2, MYO1B, UBE2M, PSMD3, PPP2R1A, CAPN1, RPS14, ATP6V1B2, GNAS, EZR, TXNL1, YWHAB, COASY, HSP90AB1, RPL26, IDH2, PSMB2, ARHGAP1, CAPZB, IMPDH2, CFAP20, SRSF2, PLEC, HNRNPD, ATP5A1, SRSF7, CAPNS1, PSMD14, ARF3, GSTP1, C12orf10, DDTL, AARS, PSMD11, ANXA6, UGP2, HNRNPDL, HUWE1, DDX3X, ATP5F1, PSMB5, DPYSL2, VAT1, NAA50, CSRP1, CAB39, …
cytoplasmic part	7.11931e-123	GO:0044444	919	531.557	7914	LDHB, SPTBN1, LDHA, SRP54, TIMM44, PARN, ANXA3, AK2, RSL1D1, FARSA, PDHA1, ARF5, SPTBN2, GAPVD1, IPO5, SRM, XPO1, PDLIM5, DECR1, EIF2A, HARS, TIMM50, NDUFC2, YME1L1, HADHA, DARS2, NAXE, KRT2, MYO1B, DNAJA3, TRMT6, RPL13, UBE2M, RPL13A, TYMS, PSMD3, DDX6, PPP2R1A, CAPN1, RPS14, HSD17B12, SLIRP, ATP6V1B2, GNAS, AGPS, EZR, IPO7, TXNL1, YWHAB, COASY, HSP90AB1, SEH1L, GLUD1, RPL26, IDH2, PSMB2, ARHGAP…
extracellular vesicle	1.38168e-122	GO:1903561	513	186.522	2777	LDHB, SPTBN1, LDHA, RBMX, ANXA3, AK2, ARF5, DECR1, NDRG3, NAXE, KRT2, MYO1B, UBE2M, PSMD3, PPP2R1A, CAPN1, RPS14, ATP6V1B2, GNAS, EZR, TXNL1, YWHAB, COASY, HSP90AB1, RPL26, IDH2, PSMB2, ARHGAP1, CAPZB, IMPDH2, CFAP20, SRSF2, PLEC, HNRNPD, ATP5A1, SRSF7, CAPNS1, PSMD14, ARF3, GSTP1, C12orf10, DDTL, AARS, PSMD11, ANXA6, UGP2, HNRNPDL, HUWE1, DDX3X, ATP5F1, PSMB5, DPYSL2, VAT1, NAA50, CSRP1, CAB39, …
extracellular organelle	1.61768e-122	GO:0043230	513	186.589	2778	LDHB, SPTBN1, LDHA, RBMX, ANXA3, AK2, ARF5, DECR1, NDRG3, NAXE, KRT2, MYO1B, UBE2M, PSMD3, PPP2R1A, CAPN1, RPS14, ATP6V1B2, GNAS, EZR, TXNL1, YWHAB, COASY, HSP90AB1, RPL26, IDH2, PSMB2, ARHGAP1, CAPZB, IMPDH2, CFAP20, SRSF2, PLEC, HNRNPD, ATP5A1, SRSF7, CAPNS1, PSMD14, ARF3, GSTP1, C12orf10, DDTL, AARS, PSMD11, ANXA6, UGP2, HNRNPDL, HUWE1, DDX3X, ATP5F1, PSMB5, DPYSL2, VAT1, NAA50, CSRP1, CAB39, …
organelle part	6.60079e-121	GO:0044422	932	548.819	8171	SPTBN1, SSB, RBMX, SRP54, TIMM44, PARN, ANXA3, AK2, RSL1D1, PDHA1, SPTBN2, IPO5, XPO1, DECR1, TIMM50, NDUFC2, YME1L1, HADHA, DARS2, NAXE, KRT2, MYO1B, DNAJA3, TRMT6, RPL13, POP1, RPL13A, TYMS, PSMD3, PPP2R1A, RPS14, HSD17B12, ATP6V1B2, AGPS, EZR, IPO7, SNRNP200, YWHAB, COASY, HSP90AB1, SEH1L, GLUD1, TRIM28, RPL26, IDH2, PSMB2, TUBA1C, PRMT5, YARS2, CAPZB, IMPDH2, SEC31A, CFAP20, SRSF2, PLEC, KIF5…
macromolecular complex	3.35382e-116	GO:0032991	668	308.295	4590	SSB, RBMX, SRP54, RSL1D1, FARSA, PDHA1, XPO1, EIF2A, RNASEH2B, TIMM50, NDUFC2, HADHA, MYO1B, TRMT6, RPL13, POP1, RPL13A, PSMD3, DDX6, PPP2R1A, FAM98A, RPS14, SLIRP, ATP6V1B2, EZR, SNRNP200, TXNL1, YWHAB, HSP90AB1, SEH1L, TRIM28, RPL26, PSMB2, PRMT5, CAPZB, SEC31A, PTPN11, G3BP1, SRSF2, KIF5B, GSPT1, HNRNPD, ATP5A1, AP3M1, PSMD14, CKAP5, GSTP1, MSH6, HNRNPH1, RBM4, COPB2, PSMD11, EIF4H, ANXA6, CNO…
membrane-bounded organelle	2.79792e-113	GO:0043227	1117	799.619	11905	LDHB, SPTBN1, SSB, LDHA, RBMX, SRP54, TIMM44, PARN, ANXA3, AK2, RSL1D1, PDHA1, ARF5, SPTBN2, GAPVD1, IPO5, XPO1, DECR1, HARS, RNASEH2B, TIMM50, NDUFC2, YME1L1, NDRG3, HADHA, DARS2, NAXE, KRT2, MYO1B, DNAJA3, TRMT6, RPL13, UBE2M, POP1, RPL13A, TYMS, PSMD3, DDX6, PPP2R1A, CAPN1, RPS14, HSD17B12, SLIRP, ATP6V1B2, GNAS, AGPS, EZR, FUBP3, IPO7, SNRNP200, TXNL1, YWHAB, COASY, HSP90AB1, SEH1L, GLUD1, TR…
intracellular part	3.73569e-112	GO:0044424	1176	909.235	13537	LDHB, SPTBN1, SSB, LDHA, RBMX, SRP54, TIMM44, PARN, ANXA3, AK2, RSL1D1, FARSA, PDHA1, ARF5, SPTBN2, GAPVD1, IPO5, SRM, XPO1, PDLIM5, DECR1, EIF2A, HARS, RNASEH2B, TIMM50, NDUFC2, YME1L1, NDRG3, HADHA, DARS2, NAXE, KRT2, MYO1B, DNAJA3, TRMT6, RPL13, UBE2M, POP1, RPL13A, TYMS, PSMD3, DDX6, PPP2R1A, FAM98A, CAPN1, RPS14, HSD17B12, SLIRP, ATP6V1B2, GNAS, AGPS, EZR, FUBP3, IPO7, SNRNP200, TXNL1, YWHAB…
organelle	5.94113e-105	GO:0043226	1144	860.002	12804	LDHB, SPTBN1, SSB, LDHA, RBMX, SRP54, TIMM44, PARN, ANXA3, AK2, RSL1D1, PDHA1, ARF5, SPTBN2, GAPVD1, IPO5, XPO1, PDLIM5, DECR1, HARS, RNASEH2B, TIMM50, NDUFC2, YME1L1, NDRG3, HADHA, DARS2, NAXE, KRT2, MYO1B, DNAJA3, TRMT6, RPL13, UBE2M, POP1, RPL13A, TYMS, PSMD3, DDX6, PPP2R1A, CAPN1, RPS14, HSD17B12, SLIRP, ATP6V1B2, GNAS, AGPS, EZR, FUBP3, IPO7, SNRNP200, TXNL1, YWHAB, COASY, HSP90AB1, SEH1L, G…
ribonucleoprotein complex	2.07246e-103	GO:1990904	237	48.6958	725	SSB, RBMX, SRP54, RSL1D1, XPO1, RPL13, POP1, RPL13A, DDX6, RPS14, SLIRP, SNRNP200, RPL26, G3BP1, SRSF2, HNRNPD, HNRNPH1, RBM4, EIF4H, CNOT9, CNOT1, EIF3L, DDX3X, SRP68, RPL10, LUC7L2, PSMA4, RPS24, RPS3A, EIF3G, RPL23A, NPM1, RPL34, HNRNPK, RPL17, RPS27A, RBM25, HNRNPAB, RPS20, DRG1, SYNCRIP, RPS13, HNRNPA3, RPL24, ATXN2L, DDX5, SF3A3, RPL18, HNRNPA0, U2AF1, YBX1, RPL5, RPS27, EEF2, SART1, ACTN4,…
intracellular ribonucleoprotein complex	2.07246e-103	GO:0030529	237	48.6958	725	SSB, RBMX, SRP54, RSL1D1, XPO1, RPL13, POP1, RPL13A, DDX6, RPS14, SLIRP, SNRNP200, RPL26, G3BP1, SRSF2, HNRNPD, HNRNPH1, RBM4, EIF4H, CNOT9, CNOT1, EIF3L, DDX3X, SRP68, RPL10, LUC7L2, PSMA4, RPS24, RPS3A, EIF3G, RPL23A, NPM1, RPL34, HNRNPK, RPL17, RPS27A, RBM25, HNRNPAB, RPS20, DRG1, SYNCRIP, RPS13, HNRNPA3, RPL24, ATXN2L, DDX5, SF3A3, RPL18, HNRNPA0, U2AF1, YBX1, RPL5, RPS27, EEF2, SART1, ACTN4,…
membrane-bounded vesicle	1.39177e-101	GO:0031988	553	237.972	3543	LDHB, SPTBN1, LDHA, RBMX, ANXA3, AK2, ARF5, SPTBN2, DECR1, NDRG3, NAXE, KRT2, MYO1B, UBE2M, PSMD3, PPP2R1A, CAPN1, RPS14, SLIRP, ATP6V1B2, GNAS, EZR, TXNL1, YWHAB, COASY, HSP90AB1, RPL26, IDH2, PSMB2, ARHGAP1, CAPZB, IMPDH2, SEC31A, CFAP20, SRSF2, PLEC, KIF5B, HNRNPD, ATP5A1, SRSF7, CAPNS1, AP3M1, PSMD14, ARF3, GSTP1, C12orf10, DDTL, COPB2, AARS, PSMD11, ANXA6, UGP2, HNRNPDL, HUWE1, DDX3X, ATP5F1…
intracellular	9.11114e-101	GO:0005622	1177	932.408	13882	LDHB, SPTBN1, SSB, LDHA, RBMX, SRP54, TIMM44, PARN, ANXA3, AK2, RSL1D1, FARSA, PDHA1, ARF5, SPTBN2, GAPVD1, IPO5, SRM, XPO1, PDLIM5, DECR1, EIF2A, HARS, RNASEH2B, TIMM50, NDUFC2, YME1L1, NDRG3, HADHA, DARS2, NAXE, KRT2, MYO1B, DNAJA3, TRMT6, RPL13, UBE2M, POP1, RPL13A, TYMS, PSMD3, DDX6, PPP2R1A, FAM98A, CAPN1, RPS14, HSD17B12, SLIRP, ATP6V1B2, GNAS, AGPS, EZR, FUBP3, IPO7, SNRNP200, TXNL1, YWHAB…
vesicle	9.91023e-99	GO:0031982	560	246.838	3675	LDHB, SPTBN1, LDHA, RBMX, ANXA3, AK2, ARF5, SPTBN2, DECR1, NDRG3, NAXE, KRT2, MYO1B, UBE2M, PSMD3, PPP2R1A, CAPN1, RPS14, SLIRP, ATP6V1B2, GNAS, EZR, TXNL1, YWHAB, COASY, HSP90AB1, RPL26, IDH2, PSMB2, TUBA1C, ARHGAP1, CAPZB, IMPDH2, SEC31A, CFAP20, SRSF2, PLEC, KIF5B, HNRNPD, ATP5A1, SRSF7, CAPNS1, AP3M1, PSMD14, ARF3, GSTP1, C12orf10, DDTL, COPB2, AARS, PSMD11, ANXA6, UGP2, HNRNPDL, HUWE1, DDX3X…
intracellular organelle	1.21263e-93	GO:0043229	1086	790.283	11766	LDHB, SPTBN1, SSB, LDHA, RBMX, SRP54, TIMM44, PARN, ANXA3, AK2, RSL1D1, PDHA1, ARF5, SPTBN2, GAPVD1, IPO5, XPO1, PDLIM5, DECR1, HARS, RNASEH2B, TIMM50, NDUFC2, YME1L1, HADHA, DARS2, NAXE, KRT2, MYO1B, DNAJA3, TRMT6, RPL13, POP1, RPL13A, TYMS, PSMD3, DDX6, PPP2R1A, CAPN1, RPS14, HSD17B12, SLIRP, ATP6V1B2, AGPS, EZR, FUBP3, IPO7, SNRNP200, TXNL1, YWHAB, COASY, HSP90AB1, SEH1L, GLUD1, TRIM28, RPL26,…
membrane-enclosed lumen	2.26406e-93	GO:0031974	609	292.377	4353	SPTBN1, SSB, RBMX, SRP54, TIMM44, PARN, AK2, RSL1D1, PDHA1, IPO5, XPO1, DECR1, TIMM50, YME1L1, HADHA, DARS2, NAXE, DNAJA3, TRMT6, POP1, RPL13A, TYMS, PSMD3, RPS14, AGPS, EZR, IPO7, SNRNP200, COASY, HSP90AB1, GLUD1, TRIM28, IDH2, PSMB2, PRMT5, YARS2, CFAP20, SRSF2, HNRNPD, ATP5A1, SRSF7, SRSF5, PSMD14, RPS6KA3, C12orf10, MSH6, HNRNPH1, RBM4, PSMD11, DDX50, TRIM25, HNRNPDL, EIF3L, AAAS, HUWE1, DDX3…
intracellular organelle lumen	9.96729e-93	GO:0070013	597	283.712	4224	SPTBN1, SSB, RBMX, SRP54, TIMM44, PARN, RSL1D1, PDHA1, IPO5, XPO1, DECR1, TIMM50, YME1L1, HADHA, DARS2, NAXE, DNAJA3, TRMT6, POP1, RPL13A, TYMS, PSMD3, RPS14, AGPS, EZR, IPO7, SNRNP200, COASY, HSP90AB1, GLUD1, TRIM28, IDH2, PSMB2, PRMT5, YARS2, CFAP20, SRSF2, HNRNPD, ATP5A1, SRSF7, SRSF5, PSMD14, RPS6KA3, C12orf10, MSH6, HNRNPH1, RBM4, PSMD11, DDX50, TRIM25, HNRNPDL, EIF3L, AAAS, HUWE1, DDX3X, HM…
organelle lumen	4.71311e-92	GO:0043233	602	288.682	4298	SPTBN1, SSB, RBMX, SRP54, TIMM44, PARN, RSL1D1, PDHA1, IPO5, XPO1, DECR1, TIMM50, YME1L1, HADHA, DARS2, NAXE, DNAJA3, TRMT6, POP1, RPL13A, TYMS, PSMD3, RPS14, AGPS, EZR, IPO7, SNRNP200, COASY, HSP90AB1, GLUD1, TRIM28, IDH2, PSMB2, PRMT5, YARS2, CFAP20, SRSF2, HNRNPD, ATP5A1, SRSF7, SRSF5, PSMD14, RPS6KA3, C12orf10, MSH6, HNRNPH1, RBM4, PSMD11, DDX50, TRIM25, HNRNPDL, EIF3L, AAAS, HUWE1, DDX3X, HM…
nuclear part	2.35379e-89	GO:0044428	561	260.271	3875	SPTBN1, SSB, RBMX, SRP54, PARN, RSL1D1, IPO5, XPO1, DECR1, TIMM50, YME1L1, NAXE, TRMT6, POP1, RPL13A, TYMS, PSMD3, RPS14, AGPS, EZR, IPO7, SNRNP200, COASY, HSP90AB1, SEH1L, TRIM28, PSMB2, PRMT5, CFAP20, SRSF2, HNRNPD, ATP5A1, SRSF7, IPO9, SRSF5, PSMD14, RPS6KA3, C12orf10, MSH6, HNRNPH1, RBM4, PSMD11, DDX50, TRIM25, HNRNPDL, EIF3L, AAAS, HUWE1, DDX3X, HMGB2, ATP5F1, PSMB5, CSTF1, SRP68, PSPC1, SMA…
intracellular membrane-bounded organelle	1.92926e-82	GO:0043231	1018	721.908	10748	LDHB, SPTBN1, SSB, LDHA, RBMX, SRP54, TIMM44, PARN, ANXA3, AK2, RSL1D1, PDHA1, ARF5, SPTBN2, GAPVD1, IPO5, XPO1, DECR1, HARS, RNASEH2B, TIMM50, NDUFC2, YME1L1, HADHA, DARS2, NAXE, KRT2, MYO1B, DNAJA3, TRMT6, RPL13, POP1, RPL13A, TYMS, PSMD3, DDX6, PPP2R1A, CAPN1, RPS14, HSD17B12, SLIRP, ATP6V1B2, AGPS, EZR, FUBP3, IPO7, SNRNP200, TXNL1, YWHAB, COASY, HSP90AB1, SEH1L, GLUD1, TRIM28, IDH2, PSMB2, T…
extracellular region part	9.85971e-82	GO:0044421	538	253.42	3773	LDHB, SPTBN1, LDHA, RBMX, ANXA3, AK2, ARF5, SPTBN2, DECR1, EIF2A, NDRG3, NAXE, KRT2, MYO1B, UBE2M, POP1, PSMD3, PPP2R1A, CAPN1, RPS14, HSD17B12, ATP6V1B2, GNAS, EZR, TXNL1, YWHAB, COASY, HSP90AB1, RPL26, IDH2, PSMB2, ARHGAP1, CAPZB, IMPDH2, CFAP20, SRSF2, PLEC, HNRNPD, ATP5A1, SRSF7, CAPNS1, PSMD14, ARF3, GSTP1, C12orf10, DDTL, AARS, PSMD11, ANXA6, UGP2, CNOT1, HNRNPDL, HUWE1, DDX3X, HMGB2, ATP5F…
nuclear lumen	1.48392e-81	GO:0031981	514	235.352	3504	SPTBN1, SSB, RBMX, SRP54, PARN, RSL1D1, IPO5, XPO1, DECR1, TIMM50, YME1L1, NAXE, TRMT6, POP1, RPL13A, TYMS, PSMD3, RPS14, AGPS, EZR, IPO7, SNRNP200, COASY, HSP90AB1, TRIM28, PSMB2, PRMT5, CFAP20, SRSF2, HNRNPD, SRSF7, SRSF5, PSMD14, RPS6KA3, C12orf10, MSH6, HNRNPH1, RBM4, PSMD11, DDX50, TRIM25, HNRNPDL, EIF3L, AAAS, HUWE1, DDX3X, HMGB2, ATP5F1, PSMB5, CSTF1, SRP68, PSPC1, SMARCA4, MTDH, SAFB, HSP…
nucleoplasm	8.72117e-71	GO:0005654	442	197.201	2936	RBMX, SRP54, IPO5, XPO1, DECR1, TIMM50, YME1L1, NAXE, TRMT6, POP1, TYMS, PSMD3, RPS14, IPO7, SNRNP200, COASY, HSP90AB1, TRIM28, PSMB2, PRMT5, CFAP20, SRSF2, HNRNPD, SRSF7, SRSF5, PSMD14, RPS6KA3, C12orf10, MSH6, HNRNPH1, RBM4, PSMD11, TRIM25, HNRNPDL, EIF3L, AAAS, HUWE1, DDX3X, HMGB2, ATP5F1, PSMB5, CSTF1, PSPC1, SMARCA4, MTDH, SAFB, HSPH1, LUC7L2, PSMA4, BUB3, SUPT5H, RPS24, CPSF7, NUP153, PDS5A…
nucleus	4.46255e-68	GO:0005634	750	461.569	6872	SPTBN1, SSB, LDHA, RBMX, SRP54, PARN, RSL1D1, PDHA1, IPO5, XPO1, DECR1, RNASEH2B, TIMM50, YME1L1, DARS2, NAXE, KRT2, DNAJA3, TRMT6, RPL13, POP1, RPL13A, TYMS, PSMD3, PPP2R1A, RPS14, SLIRP, AGPS, EZR, FUBP3, IPO7, SNRNP200, TXNL1, YWHAB, COASY, HSP90AB1, SEH1L, TRIM28, PSMB2, TUBA1C, PRMT5, IMPDH2, PTPN11, CFAP20, G3BP1, SRSF2, HNRNPD, ATP5A1, SRSF7, IPO9, SRSF5, PSMD14, RPS6KA3, UNC45A, GSTP1, C1…
intracellular non-membrane-bounded organelle	4.05209e-63	GO:0043232	506	257.651	3836	SPTBN1, SSB, RBMX, SRP54, PARN, RSL1D1, SPTBN2, IPO5, XPO1, PDLIM5, HADHA, KRT2, MYO1B, DNAJA3, RPL13, POP1, RPL13A, TYMS, DDX6, PPP2R1A, RPS14, AGPS, EZR, SEH1L, TRIM28, RPL26, TUBA1C, CAPZB, CFAP20, G3BP1, CNN3, PLEC, KIF5B, SRSF5, CKAP5, MSH6, RBM4, CNOT9, DDX50, CNOT1, EIF3L, AAAS, DDX3X, HMGB2, PSMB5, SRP68, DPYSL2, PSPC1, SMARCA4, MTDH, RPL10, HSPH1, ENO1, EEF1A1, PSMA4, DNM2, CCT3, SPAG9, …
non-membrane-bounded organelle	4.05209e-63	GO:0043228	506	257.651	3836	SPTBN1, SSB, RBMX, SRP54, PARN, RSL1D1, SPTBN2, IPO5, XPO1, PDLIM5, HADHA, KRT2, MYO1B, DNAJA3, RPL13, POP1, RPL13A, TYMS, DDX6, PPP2R1A, RPS14, AGPS, EZR, SEH1L, TRIM28, RPL26, TUBA1C, CAPZB, CFAP20, G3BP1, CNN3, PLEC, KIF5B, SRSF5, CKAP5, MSH6, RBM4, CNOT9, DDX50, CNOT1, EIF3L, AAAS, DDX3X, HMGB2, PSMB5, SRP68, DPYSL2, PSPC1, SMARCA4, MTDH, RPL10, HSPH1, ENO1, EEF1A1, PSMA4, DNM2, CCT3, SPAG9, …
cytosolic ribosome	3.4795e-59	GO:0022626	75	7.79134	116	RSL1D1, RPL13, RPL13A, RPS14, RPL26, DDX3X, RPL10, RPS24, RPS3A, RPL23A, RPL34, RPL17, RPS27A, RPS20, RPS13, RPL24, RPL18, RPL5, RPS27, RPL27, MRTO4, RPL12, RPL6, RPL38, RPL9, RPS15, RPS2, RPL31, RPLP2, RPS4X, RPL35A, RPL7, RPS26, RPS23, RPL35, RPL8, RPL11, RPSA, RPL32, RPS12, RPS10, RPL4, RPL18A, RPS11, RPS15A, FXR2, NAA10, RPL3, ZNF622, MRPL4, RPS27L, RPS7, RPL15, RPS9, RPS19, RPL36, RPL27A, RP…
cytosolic part	3.02122e-56	GO:0044445	99	15.1125	225	RSL1D1, RPL13, RPL13A, RPS14, RPL26, PSMD14, DDX3X, RPL10, ENO1, CCT3, RPS24, RPS3A, RPL23A, RPL34, PFKL, RPL17, RPS27A, RPS20, RPS13, RPL24, RPL18, CYB5R3, RPL5, RPS27, CCT7, RPL27, MRTO4, RPL12, RPL6, RPL38, RPL9, PSMC3, RPS15, RPS2, RPL31, CCT6A, RPLP2, RRM1, RPS4X, RPL35A, RPL7, RPS26, RPS23, RPL35, RPL8, RPL11, CCT5, RPSA, RPL32, TCP1, RPS12, RPS10, RPL4, RPL18A, RPS11, RPS15A, FXR2, NAA10, …
extracellular region	2.54182e-54	GO:0005576	541	302.452	4503	LDHB, SPTBN1, LDHA, RBMX, ANXA3, AK2, ARF5, SPTBN2, DECR1, EIF2A, NDRG3, NAXE, KRT2, MYO1B, UBE2M, POP1, PSMD3, PPP2R1A, CAPN1, RPS14, HSD17B12, ATP6V1B2, GNAS, EZR, TXNL1, YWHAB, COASY, HSP90AB1, RPL26, IDH2, PSMB2, ARHGAP1, CAPZB, IMPDH2, CFAP20, SRSF2, PLEC, HNRNPD, ATP5A1, SRSF7, CAPNS1, PSMD14, ARF3, GSTP1, C12orf10, DDTL, AARS, PSMD11, ANXA6, UGP2, CNOT1, HNRNPDL, HUWE1, DDX3X, HMGB2, ATP5F…
protein complex	1.79341e-53	GO:0043234	489	261.278	3890	FARSA, PDHA1, XPO1, EIF2A, RNASEH2B, TIMM50, NDUFC2, HADHA, MYO1B, TRMT6, RPL13A, PSMD3, PPP2R1A, FAM98A, ATP6V1B2, EZR, TXNL1, YWHAB, HSP90AB1, SEH1L, TRIM28, PSMB2, PRMT5, CAPZB, SEC31A, PTPN11, KIF5B, GSPT1, ATP5A1, AP3M1, PSMD14, CKAP5, GSTP1, MSH6, COPB2, PSMD11, EIF4H, ANXA6, CNOT9, CNOT1, EIF3L, DDX3X, HMGB2, ATP5F1, PSMB5, LRRC47, DPYSL2, NAA50, SMARCA4, PRPS1, CAB39, RAB10, ENO1, EEF1A1,…
ribosome	3.60934e-50	GO:0005840	94	15.3812	229	RSL1D1, RPL13, RPL13A, RPS14, RPL26, DDX3X, SRP68, RPL10, RPS24, RPS3A, RPL23A, RPL34, RPL17, RPS27A, RPS20, RPS13, RPL24, RPL18, RPL5, RPS27, EEF2, MRPL47, RPL27, MRTO4, RPL12, RPL6, RPL38, RPL9, RPS15, RPS2, MRPS34, RPL31, RPLP2, RPS4X, RPL35A, RPL7, RPS26, RPS23, RPL35, RPL8, RPL11, MRPS9, RPSA, RPL32, RPS12, RPS10, RPL4, RPL18A, RPS11, RPS15A, FXR2, NAA10, MRPS2, RPL3, ZNF622, MRPL4, RPS27L, …
ribosomal subunit	1.42008e-47	GO:0044391	78	11.0153	164	RSL1D1, RPL13, RPL13A, RPS14, RPL26, DDX3X, RPL10, RPS24, RPS3A, RPL23A, RPL34, RPL17, RPS27A, RPS20, RPS13, RPL24, RPL18, RPL5, RPS27, MRPL47, RPL27, MRTO4, RPL12, RPL6, RPL38, RPL9, RPS15, RPS2, RPL31, RPLP2, RPS4X, RPL35A, RPL7, RPS26, RPS23, RPL35, RPL8, RPL11, MRPS9, RPSA, RPL32, RPS12, RPS10, RPL4, RPL18A, RPS11, RPS15A, FXR2, MRPS2, RPL3, ZNF622, RPS27L, RPS7, RPL15, RPS9, RPS19, RPL36, RP…
mitochondrion	2.37182e-40	GO:0005739	255	109.482	1630	LDHB, TIMM44, AK2, PDHA1, DECR1, HARS, TIMM50, NDUFC2, YME1L1, HADHA, DARS2, NAXE, DNAJA3, TYMS, PPP2R1A, CAPN1, RPS14, SLIRP, AGPS, TXNL1, YWHAB, COASY, HSP90AB1, GLUD1, IDH2, YARS2, PTPN11, ATP5A1, GSTP1, C12orf10, AARS, ANXA6, DDX3X, ATP5F1, AGK, DPYSL2, VAT1, ATIC, PHB2, GFM1, IDH3B, RPL34, ACOT7, CNP, FH, ATP6V1A, NDUFA9, CIAPIN1, SORD, HNRNPK, MAT2B, CYC1, IDH3A, BSG, MPST, TBC1D15, PNPT1, …
focal adhesion	5.39497e-40	GO:0005925	110	26.2622	391	RPL13A, CAPN1, RPS14, EZR, YWHAB, G3BP1, CNN3, PLEC, ANXA6, SRP68, CSRP1, RAB10, DNM2, RPS3A, NPM1, HNRNPK, CLTC, RPS13, BSG, HYOU1, AHNAK, ACTR3, RPL18, CPNE3, YWHAQ, RPL5, ACTN4, RAC1, RPL27, PDIA3, PABPC1, ACTR2, RPL12, RPL6, PPP1CB, RPL38, VIM, PFN1, FLII, RPL9, TWF1, RPS15, IQGAP1, MAPK1, DOCK7, CAPN2, RPS2, ANXA1, RPL31, CAP1, YWHAE, RPLP2, CORO1C, RPS4X, CORO1B, RPL7, MYH9, LAP3, FLNB, RPL…
cell-substrate adherens junction	1.19356e-39	GO:0005924	110	26.4637	394	RPL13A, CAPN1, RPS14, EZR, YWHAB, G3BP1, CNN3, PLEC, ANXA6, SRP68, CSRP1, RAB10, DNM2, RPS3A, NPM1, HNRNPK, CLTC, RPS13, BSG, HYOU1, AHNAK, ACTR3, RPL18, CPNE3, YWHAQ, RPL5, ACTN4, RAC1, RPL27, PDIA3, PABPC1, ACTR2, RPL12, RPL6, PPP1CB, RPL38, VIM, PFN1, FLII, RPL9, TWF1, RPS15, IQGAP1, MAPK1, DOCK7, CAPN2, RPS2, ANXA1, RPL31, CAP1, YWHAE, RPLP2, CORO1C, RPS4X, CORO1B, RPL7, MYH9, LAP3, FLNB, RPL…
cell-substrate junction	3.39376e-39	GO:0030055	110	26.7323	398	RPL13A, CAPN1, RPS14, EZR, YWHAB, G3BP1, CNN3, PLEC, ANXA6, SRP68, CSRP1, RAB10, DNM2, RPS3A, NPM1, HNRNPK, CLTC, RPS13, BSG, HYOU1, AHNAK, ACTR3, RPL18, CPNE3, YWHAQ, RPL5, ACTN4, RAC1, RPL27, PDIA3, PABPC1, ACTR2, RPL12, RPL6, PPP1CB, RPL38, VIM, PFN1, FLII, RPL9, TWF1, RPS15, IQGAP1, MAPK1, DOCK7, CAPN2, RPS2, ANXA1, RPL31, CAP1, YWHAE, RPLP2, CORO1C, RPS4X, CORO1B, RPL7, MYH9, LAP3, FLNB, RPL…
cell part	3.937e-36	GO:0044464	1181	1074.53	15998	LDHB, SPTBN1, SSB, LDHA, RBMX, SRP54, TIMM44, PARN, ANXA3, AK2, RSL1D1, FARSA, PDHA1, ARF5, SPTBN2, GAPVD1, IPO5, SRM, XPO1, PDLIM5, DECR1, EIF2A, HARS, RNASEH2B, TIMM50, NDUFC2, YME1L1, NDRG3, HADHA, DARS2, NAXE, KRT2, MYO1B, DNAJA3, TRMT6, RPL13, UBE2M, POP1, CLPTM1, RPL13A, TYMS, PSMD3, DDX6, PPP2R1A, FAM98A, CAPN1, RPS14, HSD17B12, SLIRP, ATP6V1B2, GNAS, AGPS, EZR, FUBP3, IPO7, SNRNP200, TXNL…
cell	2.36545e-35	GO:0005623	1181	1076.35	16025	LDHB, SPTBN1, SSB, LDHA, RBMX, SRP54, TIMM44, PARN, ANXA3, AK2, RSL1D1, FARSA, PDHA1, ARF5, SPTBN2, GAPVD1, IPO5, SRM, XPO1, PDLIM5, DECR1, EIF2A, HARS, RNASEH2B, TIMM50, NDUFC2, YME1L1, NDRG3, HADHA, DARS2, NAXE, KRT2, MYO1B, DNAJA3, TRMT6, RPL13, UBE2M, POP1, CLPTM1, RPL13A, TYMS, PSMD3, DDX6, PPP2R1A, FAM98A, CAPN1, RPS14, HSD17B12, SLIRP, ATP6V1B2, GNAS, AGPS, EZR, FUBP3, IPO7, SNRNP200, TXNL…
adherens junction	8.01575e-35	GO:0005912	114	31.5012	469	RPL13A, CAPN1, RPS14, EZR, YWHAB, G3BP1, CNN3, PLEC, ANXA6, SRP68, CSRP1, RAB10, DNM2, RPS3A, SCRIB, NPM1, CTNND1, HNRNPK, CLTC, RPS13, BSG, HYOU1, AHNAK, ACTR3, RPL18, CPNE3, YWHAQ, RPL5, ACTN4, RAC1, RPL27, PDIA3, PABPC1, ACTR2, RPL12, RPL6, PPP1CB, RPL38, VIM, PFN1, FLII, RPL9, TWF1, RPS15, IQGAP1, MAPK1, DOCK7, CAPN2, RPS2, ANXA1, RPL31, CAP1, YWHAE, RPLP2, CORO1C, RPS4X, CORO1B, RPL7, MYH9, …
organelle envelope	1.11547e-34	GO:0031967	187	72.8759	1085	TIMM44, AK2, IPO5, XPO1, TIMM50, NDUFC2, YME1L1, HADHA, TYMS, IPO7, COASY, SEH1L, IDH2, ATP5A1, IPO9, AAAS, DDX3X, ATP5F1, AGK, VAT1, MTDH, PHB2, XPO7, NUP153, NUP133, CNP, NDUFA9, SEC13, CIAPIN1, LEMD3, SORD, CYC1, TNPO3, PNPT1, ATP5L, MYOF, ASS1, RTCB, CYB5R3, PDCD6, ACSL3, PGAM5, YBX1, KPNB1, ABCF2, ABCB7, MAD2L1, CPOX, ATP5O, KPNA6, MRPL47, MRTO4, RRP12, PMPCA, SLC25A1, DDX19B, SLC25A11, UBE2…
envelope	2.38623e-34	GO:0031975	187	73.2789	1091	TIMM44, AK2, IPO5, XPO1, TIMM50, NDUFC2, YME1L1, HADHA, TYMS, IPO7, COASY, SEH1L, IDH2, ATP5A1, IPO9, AAAS, DDX3X, ATP5F1, AGK, VAT1, MTDH, PHB2, XPO7, NUP153, NUP133, CNP, NDUFA9, SEC13, CIAPIN1, LEMD3, SORD, CYC1, TNPO3, PNPT1, ATP5L, MYOF, ASS1, RTCB, CYB5R3, PDCD6, ACSL3, PGAM5, YBX1, KPNB1, ABCF2, ABCB7, MAD2L1, CPOX, ATP5O, KPNA6, MRPL47, MRTO4, RRP12, PMPCA, SLC25A1, DDX19B, SLC25A11, UBE2…
cytosolic large ribosomal subunit	5.30384e-34	GO:0022625	42	4.29867	64	RSL1D1, RPL13, RPL13A, RPL26, RPL10, RPL23A, RPL34, RPL17, RPL24, RPL18, RPL5, RPL27, MRTO4, RPL12, RPL6, RPL38, RPL9, RPL31, RPLP2, RPL35A, RPL7, RPL35, RPL8, RPL11, RPL32, RPL4, RPL18A, FXR2, RPL3, ZNF622, RPL15, RPL36, RPL27A, RPL14, RPL23, RPL21, RPL7A, RPL19, RPL30, RPLP0, RPL10A, RPL22
anchoring junction	1.10778e-33	GO:0070161	115	32.8445	489	RPL13A, CAPN1, RPS14, EZR, YWHAB, G3BP1, CNN3, PLEC, ANXA6, SRP68, CSRP1, RAB10, DNM2, RPS3A, SCRIB, NPM1, CTNND1, HNRNPK, CLTC, RPS13, BSG, HYOU1, AHNAK, ACTR3, RPL18, CPNE3, YWHAQ, RPL5, ACTN4, RAC1, RPL27, PDIA3, PABPC1, ACTR2, RPL12, RPL6, PPP1CB, RPL38, VIM, PFN1, FLII, RPL9, TWF1, RPS15, IQGAP1, MAPK1, DOCK7, CAPN2, RPS2, ANXA1, RPL31, CAP1, YWHAE, RPLP2, CORO1C, RPS4X, CORO1B, RPL7, MYH9, …
mitochondrial part	1.6664e-33	GO:0044429	170	63.8084	950	TIMM44, AK2, PDHA1, DECR1, TIMM50, NDUFC2, YME1L1, HADHA, DARS2, NAXE, DNAJA3, TYMS, COASY, GLUD1, IDH2, YARS2, ATP5A1, DDX3X, ATP5F1, AGK, VAT1, PHB2, GFM1, IDH3B, CNP, FH, NDUFA9, CIAPIN1, SORD, CYC1, IDH3A, PNPT1, ATP5L, ASS1, CYB5R3, ACSL3, ACO2, PGAM5, ABCF2, PPA2, ABCB7, CPOX, ATP5O, MRPL47, TUFM, GSR, ETFB, PMPCA, SLC25A1, SLC25A11, ATAD3A, DLAT, IARS2, QARS, UQCRC2, ALDH3A2, GLS, ANXA1, C…
myelin sheath	4.28894e-33	GO:0043209	65	11.284	168	LDHB, PDHA1, ATP6V1B2, EZR, ATP5A1, ATP5F1, DPYSL2, ENO1, CCT3, SCRIB, CNP, EEF1A2, ATP6V1A, STIP1, IDH3A, WDR1, SEPT2, MDH1, HSP90AA1, ACO2, PKM, PDIA3, UCHL1, NSF, ANXA2, TUBB4B, DLAT, UQCRC2, GPI, PHB, TUBB4A, SDHA, DLD, MSN, YWHAG, CCT5, TCP1, SLC25A5, NAPA, PHGDH, ATP5B, NDUFA10, ACTG1, GDI2, GOT2, VCP, SEPT8, PDCD6IP, SLC25A4, FSCN1, MDH2, UQCRC1, AKR1B1, UQCRFS1, TUBA1A, GNB1, NDUFS1, ATP1…
spliceosomal complex	1.3303e-31	GO:0005681	64	11.4855	171	RBMX, SNRNP200, SRSF2, HNRNPH1, LUC7L2, HNRNPK, RBM25, SYNCRIP, HNRNPA3, DDX5, SF3A3, U2AF1, YBX1, SART1, PRPF31, PABPC1, LUC7L3, SF3B1, SNRNP40, EFTUD2, HNRNPM, EIF4A3, HNRNPC, CTNNBL1, U2AF2, UPF1, CDC5L, SRSF1, SKIV2L2, SNRPB, SNRPD1, SNRPD3, SNRPA1, SF3A2, HNRNPF, PRPF6, SNRPE, SF3B3, DHX15, SNRNP70, DDX39B, SF1, DDX23, API5, HNRNPH3, SRRM2, PRPF8, RALY, SNRPF, PRPF40A, CCAR2, SRRM1, SF3B2, P…
nucleolus	3.19833e-30	GO:0005730	152	56.6887	844	SPTBN1, SRP54, PARN, RSL1D1, IPO5, XPO1, POP1, RPL13A, TYMS, RPS14, AGPS, EZR, SRSF5, RBM4, DDX50, EIF3L, HMGB2, SRP68, PSPC1, SMARCA4, MTDH, EEF1A1, NUP153, RPS3A, RPL23A, NPM1, DDX18, RPL34, SMARCA5, CIAPIN1, BYSL, RPS27A, RPS13, CUL2, EXOSC2, SEPT2, DDX5, RPL18, RPL5, DDX17, ACACA, MRTO4, RPL12, RRP12, PPP1CB, GNL3, PPP1CA, PA2G4, BRIX1, RPL9, HNRNPM, LYAR, SRP72, FEN1, RPS2, CDC5L, NOP56, SKI…
catalytic step 2 spliceosome	2.21933e-29	GO:0071013	45	5.97783	89	RBMX, SNRNP200, HNRNPH1, HNRNPK, SYNCRIP, HNRNPA3, DDX5, SF3A3, U2AF1, SART1, PABPC1, SF3B1, SNRNP40, EFTUD2, HNRNPM, EIF4A3, HNRNPC, CDC5L, SRSF1, SKIV2L2, SNRPB, SNRPD1, SNRPD3, SNRPA1, SF3A2, HNRNPF, PRPF6, SNRPE, SF3B3, DDX23, SRRM2, PRPF8, RALY, SNRPF, SRRM1, SF3B2, PRPF19, HNRNPA2B1, ALYREF, MAGOHB, PPIL1, HNRNPA1, HNRNPU, HNRNPR, SNRPD2
cytosolic small ribosomal subunit	2.12454e-27	GO:0022627	31	2.88817	43	RPS14, DDX3X, RPS24, RPS3A, RPS27A, RPS20, RPS13, RPS27, RPS15, RPS2, RPS4X, RPS26, RPS23, RPSA, RPS12, RPS10, RPS11, RPS15A, RPS27L, RPS7, RPS9, RPS19, RPS6, RPS16, RPS25, RPS5, RPS17, RPS18, RPS3, MCTS1, RPS8
large ribosomal subunit	3.08915e-26	GO:0015934	44	6.51517	97	RSL1D1, RPL13, RPL13A, RPL26, RPL10, RPL23A, RPL34, RPL17, RPL24, RPL18, RPL5, MRPL47, RPL27, MRTO4, RPL12, RPL6, RPL38, RPL9, RPL31, RPLP2, RPL35A, RPL7, RPL35, RPL8, RPL11, RPL32, RPL4, RPL18A, FXR2, RPL3, ZNF622, RPL15, RPL36, RPL27A, RPL14, RPL23, RPL21, RPL7A, RPL19, RPL30, RPLP0, RPL10A, RPL22, MRPL13
proteasome complex	7.33457e-23	GO:0000502	34	4.433	66	PSMD3, TXNL1, PSMB2, PSMD14, PSMD11, PSMB5, PSMA4, PSMA7, PSMD8, PSMC3, PSMB4, PSMD7, PSMD10, PSMF1, PSMD13, PSMC5, PSMD1, PSMD2, PSMB7, VCP, PSMC2, PSMA1, PSMC1, KIAA0368, PSMC4, IDE, PSMA2, PSMD12, PSMB3, PSMD6, PSMA3, PSMB1, PSMC6, PSME3
small ribosomal subunit	1.39485e-22	GO:0015935	34	4.50017	67	RPS14, DDX3X, RPS24, RPS3A, RPS27A, RPS20, RPS13, RPS27, RPS15, RPS2, RPS4X, RPS26, RPS23, MRPS9, RPSA, RPS12, RPS10, RPS11, RPS15A, MRPS2, RPS27L, RPS7, RPS9, RPS19, RACK1, RPS6, RPS16, RPS25, RPS5, RPS17, RPS18, RPS3, MCTS1, RPS8
mitochondrial matrix	4.80823e-21	GO:0005759	85	27.6727	412	TIMM44, PDHA1, DECR1, HADHA, DARS2, NAXE, DNAJA3, TYMS, COASY, GLUD1, IDH2, YARS2, ATP5A1, ATP5F1, GFM1, IDH3B, FH, NDUFA9, IDH3A, ACO2, PPA2, MRPL47, TUFM, GSR, ETFB, PMPCA, ATAD3A, DLAT, IARS2, QARS, GLS, ALDH1B1, OAT, OXCT1, HSD17B10, LRRC59, ACOT9, DHRS2, SHMT2, DHX30, DLD, MRPS9, ETFA, CLPP, SLC25A5, NDUFS2, ATP5B, MRPS2, NDUFA10, POLDIP2, LONP1, HADHB, C1QBP, HSPD1, PITRM1, LRPPRC, GOT2, AC…
organelle inner membrane	7.46908e-21	GO:0019866	98	35.1953	524	TIMM44, AK2, TIMM50, NDUFC2, YME1L1, HADHA, TYMS, IDH2, ATP5A1, ATP5F1, PHB2, CNP, NDUFA9, LEMD3, CYC1, ATP5L, CYB5R3, ABCB7, CPOX, ATP5O, MRPL47, PMPCA, SLC25A1, SLC25A11, ATAD3A, UQCRC2, ALDH3A2, COX4I1, NDUFA13, MRPS34, TMPO, PHB, AIFM1, NDUFB4, SLC25A6, SDHA, STOML2, COX6C, LBR, SHMT2, SLC25A13, MRPS9, CBX3, ATP5H, SIGMAR1, NDUFA4, SLC25A5, GPD2, ATAD3B, NDUFS2, AFG3L2, ATP5B, NDUFA10, MRPL4,…
mitochondrial membrane	9.17801e-21	GO:0031966	112	43.6583	650	TIMM44, AK2, TIMM50, NDUFC2, YME1L1, HADHA, TYMS, COASY, IDH2, ATP5A1, DDX3X, ATP5F1, AGK, VAT1, PHB2, CNP, NDUFA9, SORD, CYC1, ATP5L, ASS1, CYB5R3, ACSL3, PGAM5, ABCB7, CPOX, ATP5O, MRPL47, PMPCA, SLC25A1, SLC25A11, ATAD3A, UQCRC2, ALDH3A2, ANXA1, COX4I1, NDUFA13, MRPS34, PHB, AIFM1, NDUFB4, SLC25A6, DNM1L, SDHA, ACSL4, HK1, STOML2, COX6C, SHMT2, SLC25A13, MRPS9, CISD2, ATP5H, NDUFA4, SLC25A5, G…
mitochondrial envelope	3.65173e-20	GO:0005740	115	46.2778	689	TIMM44, AK2, TIMM50, NDUFC2, YME1L1, HADHA, TYMS, COASY, IDH2, ATP5A1, DDX3X, ATP5F1, AGK, VAT1, PHB2, CNP, NDUFA9, CIAPIN1, SORD, CYC1, PNPT1, ATP5L, ASS1, CYB5R3, ACSL3, PGAM5, ABCF2, ABCB7, CPOX, ATP5O, MRPL47, PMPCA, SLC25A1, SLC25A11, ATAD3A, UQCRC2, ALDH3A2, ANXA1, COX4I1, NDUFA13, MRPS34, PHB, AIFM1, NDUFB4, SLC25A6, DNM1L, SDHA, ACSL4, HK1, STOML2, COX6C, SHMT2, SLC25A13, MRPS9, CISD2, AT…
mitochondrial inner membrane	1.87876e-19	GO:0005743	89	31.5012	469	TIMM44, AK2, TIMM50, NDUFC2, YME1L1, HADHA, TYMS, IDH2, ATP5A1, ATP5F1, PHB2, CNP, NDUFA9, CYC1, ATP5L, CYB5R3, ABCB7, CPOX, ATP5O, MRPL47, PMPCA, SLC25A1, SLC25A11, ATAD3A, UQCRC2, ALDH3A2, COX4I1, NDUFA13, MRPS34, PHB, AIFM1, NDUFB4, SLC25A6, SDHA, STOML2, COX6C, SHMT2, SLC25A13, MRPS9, ATP5H, NDUFA4, SLC25A5, GPD2, ATAD3B, NDUFS2, AFG3L2, ATP5B, NDUFA10, MRPL4, MTCH2, FAHD1, TOMM22, OCIAD2, AB…
pigment granule	4.14287e-18	GO:0048770	37	6.91817	103	ATP6V1B2, YWHAB, HSP90AB1, ANXA6, CTSD, CNP, CLTC, BSG, HSP90AA1, PDIA6, RAB7A, FASN, RAC1, TMED10, PDIA3, SLC1A5, ANXA2, YWHAE, RAB5B, AHCY, GANAB, NAP1L1, PPIB, TMEM33, ERP29, CCT4, RAB1A, RAN, SLC2A1, SEC22B, RPN1, PDCD6IP, RAB5C, SND1, GGH, ATP1A1, HSP90B1
melanosome	4.14287e-18	GO:0042470	37	6.91817	103	ATP6V1B2, YWHAB, HSP90AB1, ANXA6, CTSD, CNP, CLTC, BSG, HSP90AA1, PDIA6, RAB7A, FASN, RAC1, TMED10, PDIA3, SLC1A5, ANXA2, YWHAE, RAB5B, AHCY, GANAB, NAP1L1, PPIB, TMEM33, ERP29, CCT4, RAB1A, RAN, SLC2A1, SEC22B, RPN1, PDCD6IP, RAB5C, SND1, GGH, ATP1A1, HSP90B1
nuclear pore	4.80638e-18	GO:0005643	32	5.17183	77	IPO5, IPO7, SEH1L, AAAS, XPO7, NUP153, NUP133, SEC13, KPNB1, MAD2L1, KPNA6, DDX19B, IPO4, NUP93, NUP98, NUP210, EIF5A, KPNA3, RAE1, TMEM33, RANBP2, KPNA2, NUP155, NUP205, NUP107, RAN, KPNA1, NUP160, NUP85, XPOT, KPNA4, RANGAP1
proteasome regulatory particle	4.78849e-17	GO:0005838	17	1.4105	21	PSMD3, PSMD14, PSMD11, PSMD8, PSMC3, PSMD7, PSMD10, PSMD13, PSMC5, PSMD1, PSMD2, PSMC2, PSMC1, PSMC4, PSMD12, PSMD6, PSMC6
proteasome accessory complex	6.26508e-17	GO:0022624	18	1.612	24	PSMD3, PSMD14, PSMD11, PSMD8, PSMC3, PSMD7, PSMD10, PSMD13, PSMC5, PSMD1, PSMD2, PSMC2, PSMC1, PSMC4, PSMD12, PSMD6, PSMC6, PSME3
chromosomal part	8.25937e-17	GO:0044427	117	52.39	780	SSB, RBMX, XPO1, PPP2R1A, SEH1L, TRIM28, MSH6, HMGB2, SMARCA4, BUB3, PDS5A, HIST1H4A, NUP133, SMARCA5, SEC13, SFPQ, HNRNPK, MRE11A, SEPT2, THOC2, HIST1H2AG, MAD2L1, CDK2, PPP1CB, PPP1CA, PPP2CB, UBE2I, MCM6, HNRNPC, IPO4, CAPN2, EIF3E, FEN1, UPF1, CDC5L, NCAPD2, NUP98, PCNA, MCM4, CHD4, PSIP1, TMPO, HAT1, RFC5, RUVBL1, SMC2, MCM5, WDR61, SMC1A, RRP1B, PPP2R5C, CBX3, MSH2, CSNK1A1, RFC2, TCP1, PRK…
nuclear speck	8.66314e-17	GO:0016607	50	13.1647	196	SRP54, TIMM50, SRSF2, SRSF5, RBM4, DDX3X, PSPC1, LUC7L2, SRSF6, POLDIP3, RBM25, ATXN2L, SF3A3, U2AF1, THOC2, PRPF31, LUC7L3, SF3B1, EFTUD2, DDX42, EIF4A3, U2AF2, CDC5L, SRSF1, BCLAF1, LMNA, RBM15, CSNK1A1, SF3A2, PRPF6, DDX46, SRSF3, RBM39, TARDBP, SNRNP70, THRAP3, DDX39B, SRRM2, PRPF8, PRPF40A, CHTOP, SRRM1, PRPF19, SRSF10, APEX1, ALYREF, NONO, CDK13, RNPS1, SART3
chromosome	1.07131e-16	GO:0005694	127	59.3082	883	SSB, RBMX, XPO1, PPP2R1A, SEH1L, TRIM28, MSH6, HMGB2, SMARCA4, BUB3, PDS5A, SUPT16H, HIST1H4A, NUP133, SMARCA5, SEC13, SFPQ, HNRNPK, MRE11A, SEPT2, THOC2, HIST1H2AG, MAD2L1, CDK2, PPP1CB, PPP1CA, PPP2CB, UBE2I, MCM6, HNRNPC, IPO4, CAPN2, EIF3E, FEN1, UPF1, CDC5L, NCAPD2, NUP98, PCNA, MCM4, CHD4, PSIP1, TMPO, HAT1, RFC5, HMGB1, RUVBL1, SMC2, MCM5, WDR61, SMC1A, RRP1B, PPP2R5C, CBX3, MSH2, CSNK1A1,…
organelle membrane	1.71947e-16	GO:0031090	267	166.103	2473	TIMM44, ANXA3, AK2, SPTBN2, IPO5, XPO1, TIMM50, NDUFC2, YME1L1, HADHA, MYO1B, TYMS, ATP6V1B2, AGPS, YWHAB, COASY, IDH2, IMPDH2, SEC31A, ATP5A1, AP3M1, ARF3, COPB2, ANXA6, AAAS, DDX3X, ATP5F1, AGK, VAT1, RAB10, MTDH, VTA1, EEF1A1, PHB2, DNM2, NUP153, NUP133, CNP, EEF1A2, ATP6V1A, NDUFA9, SEC13, LEMD3, SORD, COPB1, CLTC, VPS26A, RPS27A, CYC1, TNPO3, COPG2, BSG, SEC24A, AHNAK, ATP5L, SEPT2, MYOF, AS…
chromosomal region	2.19839e-16	GO:0098687	67	22.2322	331	SSB, XPO1, PPP2R1A, SEH1L, BUB3, PDS5A, HIST1H4A, NUP133, SEC13, MRE11A, SEPT2, THOC2, MAD2L1, CDK2, PPP1CB, PPP1CA, PPP2CB, MCM6, FEN1, UPF1, NCAPD2, NUP98, PCNA, MCM4, HAT1, MCM5, SMC1A, PPP2R5C, CBX3, MSH2, CSNK1A1, PRKDC, STAG2, RPA1, CLASP1, DYNLL1, PTGES3, TELO2, POLD1, DCTN1, NAT10, MCM7, NUP107, RAD50, XRCC5, RCC2, MCM3, DCTN2, CDC73, POLR2B, CDK1, XRCC6, DNMT1, PARP1, NUP160, DYNC1LI1, M…
nuclear body	2.60263e-15	GO:0016604	67	23.3068	347	SRP54, XPO1, TIMM50, SRSF2, SRSF5, RBM4, DDX3X, PSPC1, MTDH, LUC7L2, SRSF6, POLDIP3, SFPQ, MRE11A, RBM25, ATXN2L, SF3A3, U2AF1, THOC2, SART1, CDK2, PRPF31, LUC7L3, SF3B1, EFTUD2, HNRNPM, DDX42, EIF4A3, UBE2I, EIF3E, U2AF2, CDC5L, SRSF1, BCLAF1, LMNA, USP7, CDK9, RBM15, CSNK1A1, SF3A2, PRPF6, DDX46, RPA1, SRSF3, RBM39, TARDBP, SNRNP70, THRAP3, DDX39B, GEMIN5, DKC1, NOP58, DDX1, SRRM2, PRPF8, PRPF4…
nuclear envelope	2.98319e-15	GO:0005635	75	28.0085	417	IPO5, XPO1, IPO7, SEH1L, IPO9, AAAS, MTDH, XPO7, NUP153, NUP133, SEC13, LEMD3, TNPO3, MYOF, RTCB, PDCD6, YBX1, KPNB1, MAD2L1, KPNA6, MRTO4, RRP12, DDX19B, UBE2I, IPO4, NUP93, NUP98, NUP210, TMPO, RRM1, NDUFB4, LRRC59, EIF5A, DHRS2, KPNA3, LMNA, LBR, ANXA7, RBM15, CBX3, SIGMAR1, HACD3, CDK4, RAE1, TMEM33, RANBP2, TNPO1, VAPA, QSOX2, KPNA2, BAX, NUP155, NUP205, MYO6, NUP107, LMNB1, ABCF1, MAPK3, EM…
membrane	1.83772e-14	GO:0016020	727	600.269	8937	LDHB, SPTBN1, LDHA, RBMX, TIMM44, ANXA3, AK2, RSL1D1, FARSA, ARF5, SPTBN2, GAPVD1, IPO5, XPO1, PDLIM5, TIMM50, NDUFC2, YME1L1, HADHA, KRT2, MYO1B, DNAJA3, RPL13, CLPTM1, RPL13A, TYMS, PSMD3, DDX6, PPP2R1A, CAPN1, RPS14, HSD17B12, ATP6V1B2, GNAS, AGPS, EZR, FUBP3, IPO7, SNRNP200, YWHAB, COASY, HSP90AB1, RPL26, IDH2, PSMB2, SLC38A2, IMPDH2, SEC31A, G3BP1, PLEC, KIF5B, USP9X, ATP5A1, CAPNS1, IPO9, A…
mitochondrial protein complex	1.85813e-14	GO:0098798	38	9.13467	136	TIMM50, NDUFC2, HADHA, ATP5A1, ATP5F1, NDUFA9, PNPT1, ATP5L, ATP5O, DLAT, UQCRC2, COX4I1, NDUFA13, NDUFB4, SLC25A6, SDHA, ATP5H, NDUFA4, TOMM40, NDUFS2, ATP5B, NDUFA10, BAX, TOMM22, TOMM70, USMG5, SDHB, ATP5J2, NDUFV1, UQCR10, UQCRC1, UQCRFS1, SUPV3L1, PMPCB, NDUFS1, ATP5C1, IMMT, BCS1L
cell junction	2.42958e-14	GO:0030054	146	77.3089	1151	SPTBN2, PDLIM5, DNAJA3, RPL13A, CAPN1, RPS14, EZR, YWHAB, G3BP1, CNN3, PLEC, ANXA6, SRP68, CSRP1, RAB10, MTDH, DNM2, RPS3A, SCRIB, NPM1, CTBP2, CTNND1, HNRNPK, CLTC, RPS13, BSG, MPST, HYOU1, WDR1, AHNAK, ACTR3, RPL18, CPNE3, YWHAQ, RPL5, ACTN4, RAC1, RPL27, PDIA3, PABPC1, ACTR2, RPL12, RPL6, PPP1CB, RPL38, VIM, PFN1, FLII, RPL9, TWF1, RPS15, IQGAP1, MAPK1, DOCK7, CAPN2, RPS2, ANXA1, CYFIP2, RPL31…
ribonucleoprotein granule	6.88191e-14	GO:0035770	39	9.94067	148	DDX6, G3BP1, RBM4, CNOT9, CNOT1, DDX3X, PSMA4, HNRNPA3, ATXN2L, YBX1, RAC1, PABPC1, RPL6, PSMC3, IQGAP1, UPF1, PABPC4, RPS4X, DHX30, FXR1, EDC4, RPS6, TUBB, STAU1, IGF2BP1, NSUN2, PSMC2, NCL, DDX1, EIF2S1, TOP1, PSMA2, CAPRIN1, TUBA1A, DHX9, HNRNPL, RPLP0, YTHDF2, HNRNPU
spliceosomal snRNP complex	1.24771e-13	GO:0097525	23	3.627	54	SNRNP200, LUC7L2, SART1, PRPF31, LUC7L3, SF3B1, SNRNP40, SNRPB, SNRPD1, SNRPD3, SNRPA1, SF3A2, PRPF6, SNRPE, SNRNP70, DDX39B, DDX23, PRPF8, SNRPF, PRPF40A, SF3B2, SNRPD2, SART3
vesicle coat	1.57497e-13	GO:0030120	21	3.0225	45	SEC31A, COPB2, COPB1, CLTC, COPG2, SEC24A, SEC24C, COPE, AP2B1, CLTCL1, AP2M1, SCYL1, ARCN1, SEC24B, SEC23A, PICALM, COPG1, SEC23B, AP2A2, AP2A1, COPA
small nuclear ribonucleoprotein complex	3.03897e-13	GO:0030532	24	4.09717	61	SNRNP200, LUC7L2, SART1, PRPF31, LUC7L3, SF3B1, SNRNP40, SNRPB, SNRPD1, SNRPD3, SNRPA1, SF3A2, PRPF6, SNRPE, SF3B3, SNRNP70, DDX39B, DDX23, PRPF8, SNRPF, PRPF40A, SF3B2, SNRPD2, SART3
cytoskeleton	2.32365e-12	GO:0005856	212	133.863	1993	SPTBN1, SPTBN2, PDLIM5, KRT2, MYO1B, DNAJA3, PPP2R1A, EZR, TUBA1C, CAPZB, CFAP20, CNN3, PLEC, KIF5B, CKAP5, AAAS, PSMB5, DPYSL2, HSPH1, EEF1A1, DNM2, CCT3, SPAG9, MAPRE1, EML4, NPM1, BYSL, HNRNPK, CLTC, KRT17, SEPT9, CLNS1A, WDR1, AHNAK, SEPT2, ACTR3, MDH1, SLC16A1, ARL3, STIM1, C14orf166, CCT7, MAD2L1, CDK2, ACACA, ACTN4, UBR4, RAC1, ACTR2, VIM, PFN1, TBCB, CUL3, FLII, PPP2CB, NUBP2, TWF1, TUBB4…
eukaryotic 48S preinitiation complex	3.0121e-12	GO:0033290	12	1.0075	15	EIF3L, EIF3G, EIF3B, EIF3E, EIF3A, EIF3D, EIF3H, EIF3M, EIF3CL, EIF2S1, EIF3I, EIF3F
cytoskeletal part	4.34981e-12	GO:0044430	167	98.735	1470	SPTBN1, SPTBN2, KRT2, MYO1B, DNAJA3, EZR, TUBA1C, CAPZB, CFAP20, KIF5B, CKAP5, AAAS, PSMB5, DPYSL2, HSPH1, EEF1A1, DNM2, CCT3, SPAG9, MAPRE1, EML4, NPM1, BYSL, HNRNPK, CLTC, KRT17, SEPT9, WDR1, SEPT2, ACTR3, MDH1, SLC16A1, ARL3, STIM1, C14orf166, CCT7, MAD2L1, CDK2, ACTN4, UBR4, RAC1, ACTR2, VIM, TBCB, CUL3, FLII, PPP2CB, NUBP2, TUBB4B, IQGAP1, MAPK1, CAPN2, MAP4, ARPC4, PCNA, CLTCL1, GNAI3, MYL1…
coated vesicle membrane	5.4948e-12	GO:0030662	35	9.33617	139	SEC31A, COPB2, SEC13, COPB1, CLTC, COPG2, SEC24A, AP3B1, SEC24C, TMED10, COPE, AP2B1, AP1M1, CLTCL1, GOSR2, AP2M1, SCYL1, AP1G1, ARCN1, AP1B1, SEC24B, SEC23A, PICALM, COPG1, SEC23B, AP2A2, HLA-C, HLA-B, MYO6, USO1, SAR1B, AP2A1, COPA, SEC22B, LMAN1
nuclear periphery	6.67811e-12	GO:0034399	32	7.99284	119	IPO5, PSPC1, PHB2, NUP153, SFPQ, KPNB1, SRPK1, HNRNPM, IPO4, NUP93, NUP98, HAT1, RUVBL1, LMNA, CAD, CFL1, TNPO1, TELO2, NUP205, NUP107, LMNB1, DDX39B, RUVBL2, KRT8, POLA1, MATR3, PRPF40A, SRRM1, NUMA1, SMC3, XPOT, NONO
cytoplasmic ribonucleoprotein granule	6.86142e-12	GO:0036464	35	9.40334	140	DDX6, G3BP1, RBM4, CNOT9, CNOT1, DDX3X, PSMA4, ATXN2L, YBX1, RAC1, PABPC1, RPL6, PSMC3, IQGAP1, UPF1, PABPC4, RPS4X, EDC4, RPS6, TUBB, STAU1, IGF2BP1, NSUN2, PSMC2, NCL, DDX1, EIF2S1, TOP1, PSMA2, CAPRIN1, TUBA1A, DHX9, RPLP0, YTHDF2, HNRNPU
inner mitochondrial membrane protein complex	7.31019e-12	GO:0098800	30	7.11967	106	TIMM50, NDUFC2, ATP5A1, ATP5F1, NDUFA9, ATP5L, ATP5O, UQCRC2, COX4I1, NDUFA13, NDUFB4, SLC25A6, SDHA, ATP5H, NDUFA4, NDUFS2, ATP5B, NDUFA10, USMG5, SDHB, ATP5J2, NDUFV1, UQCR10, UQCRC1, UQCRFS1, PMPCB, NDUFS1, ATP5C1, IMMT, BCS1L
membrane coat	7.50858e-12	GO:0030117	27	5.8435	87	SEC31A, AP3M1, COPB2, COPB1, CLTC, COPG2, SEC24A, AP3B1, SEC24C, COPE, AP2B1, AP1M1, CLTCL1, AP2M1, AP3D1, SCYL1, AP1G1, ARCN1, AP1B1, SEC24B, SEC23A, PICALM, COPG1, SEC23B, AP2A2, AP2A1, COPA
coated membrane	7.50858e-12	GO:0048475	27	5.8435	87	SEC31A, AP3M1, COPB2, COPB1, CLTC, COPG2, SEC24A, AP3B1, SEC24C, COPE, AP2B1, AP1M1, CLTCL1, AP2M1, AP3D1, SCYL1, AP1G1, ARCN1, AP1B1, SEC24B, SEC23A, PICALM, COPG1, SEC23B, AP2A2, AP2A1, COPA
translation preinitiation complex	1.13073e-11	GO:0070993	12	1.07467	16	EIF3L, EIF3G, EIF3B, EIF3E, EIF3A, EIF3D, EIF3H, EIF3M, EIF3CL, EIF2S1, EIF3I, EIF3F
eukaryotic translation initiation factor 3 complex	1.13073e-11	GO:0005852	12	1.07467	16	EIF3L, DDX3X, EIF3G, EIF3B, EIF3E, EIF3A, EIF3D, EIF3H, EIF3M, EIF3CL, EIF3I, EIF3F
cytosolic proteasome complex	1.85244e-11	GO:0031597	10	0.738834	11	PSMD14, PSMC3, PSMC5, PSMD1, PSMD2, PSMC2, PSMC1, PSMC4, IDE, PSMC6
microtubule cytoskeleton	2.56e-11	GO:0015630	129	71.5997	1066	PPP2R1A, EZR, TUBA1C, CFAP20, KIF5B, CKAP5, AAAS, PSMB5, DPYSL2, HSPH1, DNM2, CCT3, SPAG9, MAPRE1, EML4, NPM1, BYSL, CLTC, SEPT9, SEPT2, MDH1, SLC16A1, ARL3, STIM1, C14orf166, CCT7, MAD2L1, CDK2, UBR4, TBCB, CUL3, FLII, PPP2CB, NUBP2, TUBB4B, IQGAP1, MAPK1, MAP4, PCNA, CLTCL1, GNAI3, CHD4, CCT6A, TBCE, YWHAE, TUBB3, TUBB2A, SCYL1, KIF11, RUVBL1, DNM1L, TUBB4A, MYH9, SRPRB, SHMT2, TUBGCP2, G6PD, C…
chromosome, telomeric region	3.10005e-11	GO:0000781	37	10.881	162	SSB, HIST1H4A, MRE11A, THOC2, CDK2, PPP1CB, PPP1CA, MCM6, FEN1, UPF1, PCNA, MCM4, HAT1, MCM5, CBX3, MSH2, PRKDC, RPA1, PTGES3, TELO2, POLD1, NAT10, MCM7, RAD50, XRCC5, MCM3, CDC73, POLR2B, CDK1, XRCC6, PARP1, MCM2, APEX1, RIF1, ALYREF, DHX36, SETX
nucleoplasm part	4.73406e-11	GO:0044451	95	47.4197	706	SRP54, XPO1, TIMM50, PRMT5, SRSF2, SRSF5, RBM4, DDX3X, PSPC1, MTDH, LUC7L2, SUPT5H, CPSF7, RBBP7, SRSF6, POLDIP3, SFPQ, MRE11A, RBM25, ATXN2L, SF3A3, CPSF2, HCFC1, U2AF1, THOC2, SART1, CDK2, PRPF31, LUC7L3, PPP1CB, PPP1CA, SF3B1, EFTUD2, HNRNPM, DDX42, EIF4A3, UBE2I, EIF3E, U2AF2, CDC5L, SRSF1, BCLAF1, TCEB1, CHD4, UBAP2L, RUVBL1, WDR61, LMNA, USP7, CDK9, RBM15, CSNK1A1, SF3A2, PRPF6, DDX46, RPA1…
methylosome	1.05086e-10	GO:0034709	10	0.806	12	PRMT5, CLNS1A, SNRPB, SNRPD1, SNRPD3, SNRPE, WDR77, SNRPF, PRMT1, SNRPD2
eukaryotic 43S preinitiation complex	1.27551e-10	GO:0016282	11	1.0075	15	EIF3L, EIF3G, EIF3B, EIF3E, EIF3A, EIF3D, EIF3H, EIF3M, EIF3CL, EIF3I, EIF3F
actin cytoskeleton	1.98129e-10	GO:0015629	67	29.4862	439	SPTBN1, SPTBN2, PDLIM5, MYO1B, DNAJA3, EZR, CAPZB, CNN3, EEF1A1, HNRNPK, SEPT9, WDR1, AHNAK, SEPT2, ACTR3, ACACA, ACTN4, RAC1, ACTR2, TWF1, TARS, IQGAP1, CAPN2, ARPC4, TCERG1, MYL12B, CAP1, ARPC1A, CORO1C, CORO1B, MYH9, STOML2, FLNB, ACTN1, FAM129B, NMT1, CAPZA2, MYH10, STAG2, CFL1, NCAPG, NCOA5, ILK, ACTG1, DCTN1, IFIT5, MYO6, SEPT11, DBN1, DSTN, DCTN2, ARPC2, ADD1, FLNA, SLC2A1, JUP, PGM1, FSCN…
nuclear chromosome, telomeric region	5.86507e-10	GO:0000784	31	8.866	132	SSB, HIST1H4A, MRE11A, THOC2, PPP1CB, PPP1CA, MCM6, FEN1, UPF1, PCNA, MCM4, HAT1, MCM5, CBX3, MSH2, PRKDC, RPA1, POLD1, NAT10, MCM7, RAD50, XRCC5, MCM3, CDC73, POLR2B, CDK1, XRCC6, PARP1, MCM2, APEX1, ALYREF
proteasome core complex	6.07822e-10	GO:0005839	12	1.34333	20	PSMB2, PSMB5, PSMA4, PSMA7, PSMB4, PSMF1, PSMB7, PSMA1, PSMA2, PSMB3, PSMA3, PSMB1
oxidoreductase complex	1.33912e-09	GO:1990204	25	6.2465	93	PDHA1, NDUFC2, NDUFA9, DLAT, UQCRC2, NDUFA13, RRM1, NDUFB4, SDHA, DLD, NDUFA4, GPD2, NDUFS2, NDUFA10, SDHB, NDUFV1, P4HA1, UQCR10, PDHB, UQCRC1, UQCRFS1, PMPCB, NDUFS1, OGDH, BCS1L
catalytic complex	3.07457e-09	GO:1902494	117	67.7712	1009	FARSA, PDHA1, NDUFC2, TRMT6, PPP2R1A, PRMT5, LRRC47, NAA50, PRPS1, CAB39, ENO1, UBA2, RBBP7, NDUFA9, MAT2B, PFKL, SKP1, CUL2, HCFC1, ABCF2, CDK2, PRPF31, RPN2, PPP1CB, CAND1, PPP1CA, CUL3, PTPA, PPP2CB, DAD1, UBE2I, DLAT, DPM1, UQCRC2, PRPSAP2, USP47, DCUN1D5, NDUFA13, GNAI3, UBE2V1, CHD4, UBAP2L, PRKAG1, RRM1, NDUFB4, RUVBL1, SDHA, WDR61, PPP2R5C, CDK9, DLD, HSPA1A, POLA2, CDK4, STT3B, NDUFA4, D…
chaperonin-containing T-complex	3.40407e-09	GO:0005832	8	0.6045	9	CCT3, CCT7, CCT6A, CCT5, TCP1, CCT4, CCT8, CCT2
proteasome regulatory particle, base subcomplex	4.94197e-09	GO:0008540	9	0.806	12	PSMC3, PSMD10, PSMC5, PSMD1, PSMD2, PSMC2, PSMC1, PSMC4, PSMC6
eukaryotic translation initiation factor 3 complex, eIF3m	6.067e-09	GO:0071541	7	0.470167	7	EIF3B, EIF3A, EIF3D, EIF3H, EIF3M, EIF3I, EIF3F
mitochondrial membrane part	6.34364e-09	GO:0044455	35	11.8885	177	TIMM50, NDUFC2, ATP5A1, ATP5F1, NDUFA9, ATP5L, ATP5O, UQCRC2, COX4I1, NDUFA13, NDUFB4, SLC25A6, SDHA, ATP5H, NDUFA4, TOMM40, NDUFS2, ATP5B, NDUFA10, TOMM22, TOMM70, USMG5, SDHB, ATP5J2, NDUFV1, RHOT2, UQCR10, UQCRC1, UQCRFS1, NNT, PMPCB, NDUFS1, ATP5C1, IMMT, BCS1L
U5 snRNP	9.93499e-09	GO:0005682	10	1.07467	16	SNRNP200, SNRNP40, SNRPB, SNRPD1, SNRPD3, PRPF6, SNRPE, DDX23, PRPF8, SNRPD2
nuclear chromosome	1.08027e-08	GO:0000228	71	35.1953	524	SSB, RBMX, TRIM28, MSH6, HMGB2, SMARCA4, HIST1H4A, SMARCA5, HNRNPK, MRE11A, THOC2, HIST1H2AG, PPP1CB, PPP1CA, UBE2I, MCM6, HNRNPC, IPO4, FEN1, UPF1, CDC5L, NCAPD2, PCNA, MCM4, CHD4, HAT1, RUVBL1, SMC2, MCM5, SMC1A, CBX3, MSH2, TCP1, PRKDC, POLA2, HIST1H2BK, RPA1, CSNK2A1, NOL6, TUBG1, TARDBP, POLD1, NAT10, MCM7, ACTL6A, RAD50, XRCC5, RUVBL2, STAT1, MCM3, MTA2, CDC73, POLR2B, LRPPRC, HIST1H1C, POL…
U4 snRNP	1.61367e-08	GO:0005687	8	0.671667	10	PRPF31, SNRPB, SNRPD1, SNRPD3, SNRPE, DDX39B, SNRPF, SNRPD2
perinuclear region of cytoplasm	1.71072e-08	GO:0048471	81	42.718	636	ARF5, SPTBN2, MYO1B, SLIRP, EZR, YWHAB, ARHGAP1, SEC31A, KIF5B, ARF3, UNC45A, EIF4H, ANXA6, HMGB2, RAB10, MTDH, DNM2, SPAG9, EIF3G, CNP, BYSL, MRE11A, PAK2, SEPT9, SEC24A, SEPT2, HSP90AA1, ACSL3, C14orf166, MAD2L1, SEC24C, ACTN4, TWF1, ANXA2, CAPN2, CDC5L, CYFIP2, AIFM1, CORO1B, DNM1L, SERBP1, SEC24B, SEC23A, MSN, NRBP1, PICALM, HSPA1A, ATXN10, CDK4, PPIB, FXR1, SEC23B, VAPA, KRT18, CLU, BAX, GAL…
microtubule	1.85288e-08	GO:0005874	58	26.7323	398	TUBA1C, CFAP20, KIF5B, CKAP5, DPYSL2, HSPH1, DNM2, CCT3, MAPRE1, EML4, BYSL, SEPT9, ARL3, STIM1, CCT7, TBCB, CUL3, TUBB4B, IQGAP1, MAP4, CCT6A, TBCE, TUBB3, TUBB2A, KIF11, TUBB4A, SRPRB, TUBGCP2, CCT5, TCP1, DYNC1I2, DYNC1H1, CLASP1, DYNLL1, TUBG1, DCTN1, MAPRE2, TMEM214, RCC2, ARHGEF2, TUBB6, DCTN2, EMD, CCT4, TUBB, LRPPRC, CDK1, MAP1B, TBCA, DYNC1LI1, NUMA1, TUBA1A, CCT8, ACTR1A, TUBA1B, PAFAH1…
U1 snRNP	2.267e-08	GO:0005685	10	1.14183	17	LUC7L2, LUC7L3, SNRPB, SNRPD1, SNRPD3, SNRPE, SNRNP70, SNRPF, PRPF40A, SNRPD2
U2-type spliceosomal complex	3.49858e-08	GO:0005684	13	2.08217	31	LUC7L2, PRPF31, LUC7L3, SF3B1, U2AF2, SNRPB, SNRPD1, SNRPD3, SF3A2, DHX15, SNRNP70, PRPF40A, SF3B2
respiratory chain	4.35679e-08	GO:0070469	21	5.37333	80	NDUFC2, NDUFA9, CYC1, UQCRC2, COX4I1, NDUFA13, NDUFB4, SDHA, NDUFA4, NDUFS2, NDUFA10, SDHB, NDUFV1, CYCS, UQCR10, UQCRC1, UQCRFS1, NNT, PMPCB, NDUFS1, BCS1L
nuclear membrane	4.51886e-08	GO:0031965	45	18.8738	281	IPO5, XPO1, AAAS, MTDH, NUP153, NUP133, LEMD3, TNPO3, MYOF, PDCD6, YBX1, KPNB1, MRTO4, RRP12, DDX19B, IPO4, NUP93, NUP98, NUP210, TMPO, NDUFB4, LMNA, LBR, RBM15, CBX3, SIGMAR1, HACD3, CDK4, RANBP2, TNPO1, VAPA, QSOX2, NUP155, NUP205, MYO6, NUP107, LMNB1, EMD, LRPPRC, MATR3, CLIC1, MRPS23, NUP85, PAFAH1B1, RANGAP1
nuclear proteasome complex	4.52937e-08	GO:0031595	7	0.537333	8	PSMC3, PSMC5, PSMC2, PSMC1, PSMC4, PSMD12, PSMC6
cytoplasmic stress granule	5.53319e-08	GO:0010494	13	2.14933	32	DDX6, G3BP1, RBM4, DDX3X, ATXN2L, YBX1, PABPC1, PABPC4, STAU1, IGF2BP1, DDX1, EIF2S1, CAPRIN1
pICln-Sm protein complex	9.07509e-08	GO:0034715	6	0.403	6	CLNS1A, SNRPD1, SNRPD3, SNRPE, SNRPF, SNRPD2
nuclear chromosome part	9.4153e-08	GO:0044454	65	32.8445	489	SSB, RBMX, TRIM28, MSH6, HMGB2, SMARCA4, HIST1H4A, SMARCA5, HNRNPK, MRE11A, THOC2, HIST1H2AG, PPP1CB, PPP1CA, UBE2I, MCM6, HNRNPC, IPO4, FEN1, UPF1, CDC5L, NCAPD2, PCNA, MCM4, CHD4, HAT1, RUVBL1, MCM5, CBX3, MSH2, TCP1, PRKDC, POLA2, HIST1H2BK, RPA1, CSNK2A1, TARDBP, POLD1, NAT10, MCM7, ACTL6A, RAD50, XRCC5, RUVBL2, STAT1, MCM3, MTA2, CDC73, POLR2B, HIST1H1C, POLA1, CDK1, XRCC6, HDAC2, HIST1H2BJ,…
respiratory chain complex	9.72642e-08	GO:0098803	18	4.2315	63	NDUFC2, NDUFA9, UQCRC2, COX4I1, NDUFA13, NDUFB4, SDHA, NDUFA4, NDUFS2, NDUFA10, SDHB, NDUFV1, UQCR10, UQCRC1, UQCRFS1, PMPCB, NDUFS1, BCS1L
supramolecular fiber	1.12989e-07	GO:0099512	81	44.5987	664	KRT2, MYO1B, DNAJA3, EZR, TUBA1C, CAPZB, CFAP20, KIF5B, CKAP5, DPYSL2, HSPH1, DNM2, CCT3, MAPRE1, EML4, BYSL, KRT17, SEPT9, WDR1, ARL3, STIM1, CCT7, RAC1, VIM, TBCB, CUL3, TUBB4B, IQGAP1, MAP4, CCT6A, TBCE, TUBB3, TUBB2A, KIF11, CORO1B, TUBB4A, SRPRB, LMNA, ACTN1, TUBGCP2, CSNK1A1, CCT5, TCP1, DYNC1I2, DYNC1H1, CLASP1, KRT18, DYNLL1, TUBG1, ACTG1, DCTN1, MAPRE2, MYO6, LMNB1, TMEM214, RCC2, ARHGEF…
polymeric cytoskeletal fiber	1.12989e-07	GO:0099513	81	44.5987	664	KRT2, MYO1B, DNAJA3, EZR, TUBA1C, CAPZB, CFAP20, KIF5B, CKAP5, DPYSL2, HSPH1, DNM2, CCT3, MAPRE1, EML4, BYSL, KRT17, SEPT9, WDR1, ARL3, STIM1, CCT7, RAC1, VIM, TBCB, CUL3, TUBB4B, IQGAP1, MAP4, CCT6A, TBCE, TUBB3, TUBB2A, KIF11, CORO1B, TUBB4A, SRPRB, LMNA, ACTN1, TUBGCP2, CSNK1A1, CCT5, TCP1, DYNC1I2, DYNC1H1, CLASP1, KRT18, DYNLL1, TUBG1, ACTG1, DCTN1, MAPRE2, MYO6, LMNB1, TMEM214, RCC2, ARHGEF…
COP9 signalosome	1.30228e-07	GO:0008180	13	2.28367	34	HSP90AB1, ATP5A1, DOCK7, MYH9, STOML2, DYNLL1, COPS8, COPS6, PLCG1, GPS1, COPS2, COPS4, COPS3
mitochondrial respiratory chain	1.73661e-07	GO:0005746	19	4.836	72	NDUFC2, NDUFA9, UQCRC2, COX4I1, NDUFA13, NDUFB4, SDHA, NDUFA4, NDUFS2, NDUFA10, SDHB, NDUFV1, UQCR10, UQCRC1, UQCRFS1, NNT, PMPCB, NDUFS1, BCS1L
zona pellucida receptor complex	1.9361e-07	GO:0002199	7	0.6045	9	CCT3, CCT7, CCT5, TCP1, CCT4, CCT8, CCT2
mitochondrial nucleoid	3.13922e-07	GO:0042645	14	2.821	42	HADHA, TUFM, ATAD3A, LRRC59, SHMT2, DHX30, SLC25A5, ATP5B, POLDIP2, LONP1, HADHB, LRPPRC, SUPV3L1, ELAC2
prespliceosome	3.20511e-07	GO:0071010	10	1.4105	21	LUC7L2, LUC7L3, SF3B1, U2AF2, SNRPB, SNRPD1, SNRPD3, SF3A2, SNRNP70, PRPF40A
coated vesicle	3.46233e-07	GO:0030135	38	15.717	234	SEC31A, COPB2, DNM2, SEC13, COPB1, CLTC, COPG2, SEC24A, AP3B1, SEC24C, TMED10, COPE, AP2B1, AP1M1, CLTCL1, GOSR2, AP2M1, SCYL1, AP1G1, ARCN1, AP1B1, SEC24B, SEC23A, PICALM, COPG1, SEC23B, AP2A2, HLA-C, HLA-B, MYO6, USO1, SAR1B, HSPD1, AP2A1, COPA, SEC22B, KIAA0368, LMAN1
U12-type spliceosomal complex	3.62056e-07	GO:0005689	11	1.74633	26	YBX1, SF3B1, SNRPB, SNRPD1, SNRPD3, SNRPE, SF3B3, DHX15, SNRPF, SF3B2, SNRPD2
COPI vesicle coat	3.83917e-07	GO:0030126	8	0.873167	13	COPB2, COPB1, COPG2, COPE, SCYL1, ARCN1, COPG1, COPA
methyltransferase complex	3.83921e-07	GO:0034708	21	6.045	90	TRMT6, PRMT5, RBBP7, CLNS1A, HCFC1, PRPF31, PPP1CB, PPP1CA, SNRPB, SNRPD1, RUVBL1, SNRPD3, SNRPE, WDR5, WDR77, RUVBL2, HDAC2, SNRPF, RBBP4, PRMT1, SNRPD2
nuclear matrix	4.18712e-07	GO:0016363	22	6.58234	98	PSPC1, PHB2, SFPQ, SRPK1, HNRNPM, HAT1, RUVBL1, LMNA, CAD, CFL1, LMNB1, DDX39B, RUVBL2, KRT8, POLA1, MATR3, PRPF40A, SRRM1, NUMA1, SMC3, XPOT, NONO
chromosome, centromeric region	5.30122e-07	GO:0000775	31	11.687	174	XPO1, PPP2R1A, SEH1L, BUB3, PDS5A, NUP133, SEC13, SEPT2, MAD2L1, PPP2CB, NCAPD2, NUP98, SMC1A, PPP2R5C, CBX3, CSNK1A1, STAG2, CLASP1, DYNLL1, DCTN1, NUP107, RCC2, DCTN2, DNMT1, NUP160, DYNC1LI1, NUP85, SMC3, SEPT7, PAFAH1B1, RANGAP1
nucleoid	6.01245e-07	GO:0009295	14	2.95533	44	HADHA, TUFM, ATAD3A, LRRC59, SHMT2, DHX30, SLC25A5, ATP5B, POLDIP2, LONP1, HADHB, LRPPRC, SUPV3L1, ELAC2
nuclear pore outer ring	6.07545e-07	GO:0031080	7	0.671667	10	SEH1L, NUP133, SEC13, NUP98, NUP107, NUP160, NUP85
whole membrane	8.59445e-07	GO:0098805	135	89.869	1338	LDHB, ANXA3, XPO1, MYO1B, ATP6V1B2, AGPS, EZR, COASY, IMPDH2, SEC31A, AP3M1, COPB2, ANXA6, DDX3X, AGK, VAT1, RAB10, VTA1, EEF1A1, PHB2, DNM2, NUP153, CTSD, CNP, EEF1A2, ATP6V1A, SEC13, COPB1, CLTC, VPS26A, RPS27A, COPG2, BSG, SEC24A, AHNAK, MYOF, ASS1, CYB5R3, ACSL3, AP3B1, PGAM5, EEF2, SEC24C, RAB1B, RAB7A, RAC1, TMED10, RPN2, ATP6V1H, NSF, ANXA2, COPE, MAPK1, CAPN2, AP2B1, ALDH3A2, ANXA1, AP1M1…
membrane protein complex	1.02742e-06	GO:0098796	108	68.1742	1015	TIMM50, NDUFC2, ATP6V1B2, SEC31A, ATP5A1, AP3M1, COPB2, ATP5F1, ATP6V1A, NDUFA9, COPB1, CLTC, VPS26A, COPG2, SEC24A, ATP5L, AP3B1, ABCF2, SEC24C, RAB7A, ATP5O, TMED10, RPN2, ATP6V1H, PTPA, YKT6, DAD1, COPE, UQCRC2, AP2B1, COX4I1, AP1M1, NDUFA13, CLTCL1, GNAI3, GOSR2, AP2M1, AP3D1, SCYL1, AP1G1, CORO1C, NDUFB4, SLC25A6, ARCN1, SDHA, MYH9, SRPRB, AP1B1, STOML2, SEC24B, SEC23A, PICALM, EMC1, ATP5H, …
cytoplasmic region	1.25178e-06	GO:0099568	42	19.1425	285	SPTBN1, SPTBN2, EZR, AP3M1, RAB10, EEF1A1, MAPRE1, HNRNPK, SEPT9, GLRX3, SEPT2, STIM1, AP3B1, ACTN4, ACTR2, UCHL1, ASPH, PFN1, ANXA2, MAPK1, CAPN2, EXOC2, CAP1, AP3D1, MYH9, FLNB, NRBP1, CAPZA2, MYH10, CLASP1, MYO6, DBN1, DSTN, FLNA, SLC2A1, NCL, SPTAN1, NUMA1, AKR1B1, SEPT7, PAFAH1B1, RANGAP1
U2 snRNP	1.34773e-06	GO:0005686	9	1.27617	19	SF3B1, SNRPB, SNRPD1, SNRPD3, SNRPA1, SF3A2, SNRPE, SF3B2, SNRPD2
proton-transporting two-sector ATPase complex	1.47704e-06	GO:0016469	14	3.15683	47	ATP6V1B2, ATP5A1, ATP5F1, ATP6V1A, ATP5L, ATP5O, ATP6V1H, ATP5H, ATP5B, ATP6V1C1, USMG5, ATP5J2, ATP6AP1, ATP5C1
Arp2/3 protein complex	1.57271e-06	GO:0005885	7	0.738834	11	ACTR3, ACTR2, ARPC4, ARPC1A, ARPC2, ARPC1B, ARPC3
MCM complex	1.57271e-06	GO:0042555	7	0.738834	11	MCM6, MCM4, MCM5, MCM7, MCM3, MCM2, MCMBP
polysome	1.58819e-06	GO:0005844	13	2.75383	41	EIF4H, DRG1, EEF2, RPS4X, RPL7, FXR1, FXR2, RPS6, PSMA1, EIF2S1, RPL7A, RPS3, GCN1
ER to Golgi transport vesicle membrane	2.1689e-06	GO:0012507	15	3.69417	55	SEC31A, SEC13, SEC24A, SEC24C, TMED10, GOSR2, SEC24B, SEC23A, SEC23B, HLA-C, HLA-B, USO1, SAR1B, SEC22B, LMAN1
respiratory chain complex III	2.25792e-06	GO:0045275	6	0.537333	8	UQCRC2, UQCR10, UQCRC1, UQCRFS1, PMPCB, BCS1L
mitochondrial respiratory chain complex III	2.25792e-06	GO:0005750	6	0.537333	8	UQCRC2, UQCR10, UQCRC1, UQCRFS1, PMPCB, BCS1L
cell cortex part	2.71343e-06	GO:0044448	23	7.8585	117	SPTBN1, SPTBN2, EZR, RAB10, EEF1A1, MAPRE1, SEPT9, SEPT2, STIM1, ACTN4, ACTR2, ASPH, CAPN2, EXOC2, CAP1, MYH9, CAPZA2, CLASP1, DSTN, FLNA, SLC2A1, SPTAN1, SEPT7
U2-type prespliceosome	3.20149e-06	GO:0071004	8	1.07467	16	LUC7L2, LUC7L3, SF3B1, U2AF2, SNRPB, SF3A2, SNRNP70, PRPF40A
mitochondrial proton-transporting ATP synthase complex	3.79144e-06	GO:0005753	9	1.4105	21	ATP5A1, ATP5F1, ATP5L, ATP5O, ATP5H, ATP5B, USMG5, ATP5J2, ATP5C1
clathrin adaptor complex	5.28386e-06	GO:0030131	10	1.8135	27	AP3M1, AP3B1, AP2B1, AP1M1, AP2M1, AP1G1, AP1B1, PICALM, AP2A2, AP2A1
COPI-coated vesicle membrane	5.69033e-06	GO:0030663	8	1.14183	17	COPB2, COPB1, COPG2, COPE, SCYL1, ARCN1, COPG1, COPA
proton-transporting two-sector ATPase complex, catalytic domain	5.69033e-06	GO:0033178	8	1.14183	17	ATP6V1B2, ATP5A1, ATP6V1A, ATP6V1H, ATP5B, ATP6V1C1, ATP6AP1, ATP5C1
SMN-Sm protein complex	5.69033e-06	GO:0034719	8	1.14183	17	SNRPB, SNRPD1, SNRPD3, SNRPE, GEMIN5, STRAP, SNRPF, SNRPD2
proton-transporting ATP synthase complex	6.03342e-06	GO:0045259	9	1.47767	22	ATP5A1, ATP5F1, ATP5L, ATP5O, ATP5H, ATP5B, USMG5, ATP5J2, ATP5C1
COPII vesicle coat	6.38426e-06	GO:0030127	6	0.6045	9	SEC31A, SEC24A, SEC24C, SEC24B, SEC23A, SEC23B
proteasome regulatory particle, lid subcomplex	7.59392e-06	GO:0008541	5	0.403	6	PSMD3, PSMD14, PSMD8, PSMD13, PSMD12
CRD-mediated mRNA stability complex	7.59392e-06	GO:0070937	5	0.403	6	SYNCRIP, YBX1, IGF2BP1, DHX9, HNRNPU
cell cortex	8.17565e-06	GO:0005938	35	15.8513	236	SPTBN1, SPTBN2, EZR, RAB10, EEF1A1, MAPRE1, HNRNPK, SEPT9, GLRX3, SEPT2, STIM1, ACTN4, ACTR2, ASPH, PFN1, ANXA2, CAPN2, EXOC2, CAP1, MYH9, FLNB, NRBP1, CAPZA2, MYH10, CLASP1, MYO6, DBN1, DSTN, FLNA, SLC2A1, NCL, SPTAN1, NUMA1, SEPT7, PAFAH1B1
COPI-coated vesicle	9.32081e-06	GO:0030137	9	1.54483	23	COPB2, COPB1, COPG2, TMED10, COPE, SCYL1, ARCN1, COPG1, COPA
replication fork	1.08703e-05	GO:0005657	15	4.16433	62	SMARCA5, CDC5L, PCNA, RFC5, RFC2, POLA2, RFC3, RPA1, POLD1, MCM3, POLA1, DNMT1, TOP1, PRPF19, PRIM2
spindle	1.34787e-05	GO:0005819	40	19.6127	292	CKAP5, MAPRE1, NPM1, CLTC, SEPT2, ARL3, MAD2L1, CUL3, PPP2CB, NUBP2, MAPK1, MAP4, CLTCL1, KIF11, MYH9, TUBGCP2, CBX3, MYH10, DIAPH1, SLC25A5, CLASP1, DYNLL1, TUBG1, DCTN1, RCC2, ARHGEF2, CDK1, NSUN2, VPS4A, DYNC1LI1, NUMA1, RPS3, PRPF19, NUP85, SMC3, RIF1, PIN4, SEPT7, PAFAH1B1, RANGAP1
ER to Golgi transport vesicle	1.47316e-05	GO:0030134	16	4.76883	71	SEC31A, SEC13, SEC24A, SEC24C, TMED10, GOSR2, SEC24B, SEC23A, SEC23B, HLA-C, HLA-B, USO1, SAR1B, SEC22B, KIAA0368, LMAN1
oligosaccharyltransferase complex	1.50414e-05	GO:0008250	6	0.671667	10	RPN2, DAD1, STT3B, RPN1, STT3A, DDOST
telomerase holoenzyme complex	1.56665e-05	GO:0005697	8	1.27617	19	HNRNPC, SNRPB, SNRPD3, SNRPE, PTGES3, NAT10, DKC1, HNRNPU
condensed chromosome	1.9102e-05	GO:0000793	30	13.1647	196	SEH1L, HMGB2, BUB3, NUP133, SMARCA5, MRE11A, SEPT2, MAD2L1, CDK2, UBE2I, NCAPD2, HMGB1, SMC2, SMC1A, CBX3, CSNK1A1, PES1, NCAPG, CLASP1, NOL6, TUBG1, NUP107, RAD50, LRPPRC, DYNC1LI1, NUP85, SMC3, SMC4, SEPT7, RANGAP1
aminoacyl-tRNA synthetase multienzyme complex	2.02576e-05	GO:0017101	4	0.268667	4	EPRS, RARS, AIMP1, KARS
eukaryotic translation elongation factor 1 complex	2.02576e-05	GO:0005853	4	0.268667	4	EEF1A1, EEF1A2, EEF1B2, EEF1D
Cajal body	2.28618e-05	GO:0015030	13	3.4255	51	XPO1, U2AF1, SART1, CDK2, PRPF31, EFTUD2, DDX42, DDX46, DKC1, NOP58, SRRM2, FBL, SART3
preribosome	2.94149e-05	GO:0030684	15	4.50017	67	RSL1D1, MRTO4, NOP56, RPLP2, RRP1B, EIF6, RPSA, PES1, NOL6, ZNF622, RPS7, NOP58, EMG1, RPLP0, FBL
clathrin coat	3.66019e-05	GO:0030118	12	3.08967	46	AP3M1, CLTC, AP3B1, AP2B1, AP1M1, CLTCL1, AP2M1, AP1G1, AP1B1, PICALM, AP2A2, AP2A1
cytochrome complex	3.73552e-05	GO:0070069	8	1.4105	21	UQCRC2, COX4I1, NDUFA4, UQCR10, UQCRC1, UQCRFS1, PMPCB, BCS1L
spliceosomal tri-snRNP complex	4.18582e-05	GO:0097526	9	1.8135	27	SART1, PRPF31, SNRPB, SNRPD1, SNRPD3, PRPF6, SNRPE, SNRPD2, SART3
inclusion body	4.24832e-05	GO:0016234	15	4.6345	69	HSP90AB1, NUP153, EEF2, SLFN11, GYS1, NUP98, PICALM, HSPA1A, RANBP2, CLU, PSMC5, POLD1, PSMC4, RAB11B, XRN2
kinetochore	4.58808e-05	GO:0000776	21	8.06	120	XPO1, SEH1L, BUB3, NUP133, SEC13, SEPT2, MAD2L1, NUP98, SMC1A, CSNK1A1, CLASP1, DYNLL1, DCTN1, NUP107, DCTN2, NUP160, DYNC1LI1, NUP85, SEPT7, PAFAH1B1, RANGAP1
exon-exon junction complex	5.52448e-05	GO:0035145	8	1.47767	22	POLDIP3, EIF4A3, UPF1, SRSF1, THRAP3, ALYREF, MAGOHB, RNPS1
AP-type membrane coat adaptor complex	5.81141e-05	GO:0030119	11	2.75383	41	AP3M1, AP3B1, AP2B1, AP1M1, AP2M1, AP3D1, AP1G1, AP1B1, PICALM, AP2A2, AP2A1
cortical cytoskeleton	5.96937e-05	GO:0030863	16	5.30617	79	SPTBN1, SPTBN2, EZR, EEF1A1, MAPRE1, ACTN4, ACTR2, CAPN2, CAP1, MYH9, CAPZA2, CLASP1, DSTN, FLNA, SLC2A1, SPTAN1
cytoplasmic vesicle membrane	6.05038e-05	GO:0030659	55	32.0385	477	ANXA3, YWHAB, SEC31A, AP3M1, COPB2, RAB10, DNM2, SEC13, COPB1, CLTC, RPS27A, COPG2, BSG, SEC24A, MYOF, YWHAQ, AP3B1, SEC24C, RAB7A, TMED10, YKT6, COPE, AP2B1, ANXA1, AP1M1, CLTCL1, GOSR2, YWHAE, AP2M1, SCYL1, AP1G1, ARCN1, DNM1L, AP1B1, SEC24B, ANXA7, SEC23A, PICALM, YWHAG, COPG1, SEC23B, TMEM30A, AP2A2, HLA-C, HLA-B, MYO6, USO1, SAR1B, AP2A1, COPA, SEC22B, LAMP2, RAB11B, RAB9A, LMAN1
tRNA-splicing ligase complex	6.39216e-05	GO:0072669	5	0.537333	8	FAM98A, RTCB, C14orf166, FAM98B, DDX1
proteasome core complex, alpha-subunit complex	6.39216e-05	GO:0019773	5	0.537333	8	PSMA4, PSMA7, PSMA1, PSMA2, PSMA3
pseudopodium	6.47586e-05	GO:0031143	7	1.14183	17	CNP, ACTN4, MAPK1, CAPN2, ACTN1, MSN, MAPK3
contractile actin filament bundle	7.19531e-05	GO:0097517	12	3.29117	49	SEPT9, ACTN4, MYL12B, CORO1B, MYH9, FLNB, ACTN1, MYH10, ILK, SEPT11, FSCN1, SEPT7
stress fiber	7.19531e-05	GO:0001725	12	3.29117	49	SEPT9, ACTN4, MYL12B, CORO1B, MYH9, FLNB, ACTN1, MYH10, ILK, SEPT11, FSCN1, SEPT7
replisome	7.91457e-05	GO:0030894	9	1.94783	29	CDC5L, PCNA, POLA2, RPA1, POLD1, MCM3, POLA1, PRPF19, PRIM2
precatalytic spliceosome	7.97945e-05	GO:0071011	8	1.54483	23	PRPF31, SNRNP40, SNRPD1, SNRPD3, SNRPE, SNRNP70, SF3B2, SNRPD2
organelle outer membrane	8.47714e-05	GO:0031968	27	12.2243	182	COASY, DDX3X, AGK, VAT1, PHB2, CNP, ASS1, CYB5R3, ACSL3, PGAM5, DNM1L, ACSL4, HK1, CISD2, SIGMAR1, TOMM40, BAX, MTCH2, TOMM22, TOMM70, VDAC3, HADHB, EMD, TIGAR, LRPPRC, RHOT2, TOMM34
cell leading edge	8.54598e-05	GO:0031252	43	23.4412	349	SPTBN1, ATP6V1B2, EZR, EEF1A1, DNM2, SCRIB, CTNND1, ACTR3, HSP90AA1, RAC1, VIM, TWF1, ANXA2, IQGAP1, SLK, CORO1C, CORO1B, MYH9, ACTN1, NRBP1, MYH10, DIAPH1, CFL1, EPB41L3, ILK, TUBG1, DCTN1, EPS8L2, IFIT5, MYO6, ARHGEF2, ARPC2, IGF2BP1, ENAH, PLCG1, TLN1, FSCN1, SLC39A14, RPS3, ARF4, CTNNA1, PAFAH1B1, ARPC3
vesicle membrane	9.21919e-05	GO:0012506	56	33.3147	496	ANXA3, YWHAB, SEC31A, AP3M1, COPB2, RAB10, DNM2, SEC13, COPB1, CLTC, RPS27A, COPG2, BSG, SEC24A, MYOF, YWHAQ, AP3B1, SEC24C, RAB7A, TMED10, YKT6, COPE, AP2B1, ANXA1, AP1M1, CLTCL1, GOSR2, YWHAE, AP2M1, SCYL1, AP1G1, ARCN1, DNM1L, AP1B1, SEC24B, ANXA7, SEC23A, PICALM, YWHAG, COPG1, SEC23B, TMEM30A, AP2A2, HLA-C, HLA-B, MYO6, USO1, ATP2A2, SAR1B, AP2A1, COPA, SEC22B, LAMP2, RAB11B, RAB9A, LMAN1
cytoplasmic vesicle part	9.92759e-05	GO:0044433	65	40.4343	602	ANXA3, YWHAB, SEC31A, AP3M1, COPB2, RAB10, HSPH1, DNM2, SEC13, COPB1, CLTC, RPS27A, COPG2, BSG, SEC24A, HYOU1, MYOF, YWHAQ, HSP90AA1, AP3B1, SEC24C, RAB7A, ACTN4, TMED10, YKT6, COPE, AP2B1, ANXA1, AP1M1, CLTCL1, GOSR2, YWHAE, AP2M1, SCYL1, AP1G1, ARCN1, DNM1L, AP1B1, SEC24B, ANXA7, DLD, ACTN1, FN1, SEC23A, PICALM, YWHAG, COPG1, SEC23B, TMEM30A, AP2A2, CLU, HLA-C, HLA-B, MYO6, USO1, SAR1B, AP2A1, …
actomyosin	0.000117557	GO:0042641	13	3.96283	59	SEPT9, ACTN4, MYL12B, CORO1B, MYH9, FLNB, ACTN1, MYH10, ILK, SEPT11, DBN1, FSCN1, SEPT7
brush border	0.000122977	GO:0005903	18	6.78384	101	MYO1B, EZR, HSP90AB1, SLC38A2, PLEC, ACTR3, HSP90AA1, ACTN4, FLII, MYL12B, DNM1L, MYH9, FLNB, ACTN1, CAPZA2, MYH10, CLIC1, MYL6
proton-transporting V-type ATPase, V1 domain	0.000135748	GO:0033180	5	0.6045	9	ATP6V1B2, ATP6V1A, ATP6V1H, ATP6V1C1, ATP6AP1
eukaryotic translation initiation factor 4F complex	0.000135748	GO:0016281	5	0.6045	9	EIF4H, EIF4G1, EIF4A1, EIF4A2, EIF4G2
outer membrane	0.000147781	GO:0019867	27	12.6273	188	COASY, DDX3X, AGK, VAT1, PHB2, CNP, ASS1, CYB5R3, ACSL3, PGAM5, DNM1L, ACSL4, HK1, CISD2, SIGMAR1, TOMM40, BAX, MTCH2, TOMM22, TOMM70, VDAC3, HADHB, EMD, TIGAR, LRPPRC, RHOT2, TOMM34
cytoplasmic, membrane-bounded vesicle	0.00015087	GO:0016023	109	77.376	1152	ANXA3, SPTBN2, SLIRP, ATP6V1B2, YWHAB, HSP90AB1, SEC31A, KIF5B, AP3M1, COPB2, ANXA6, RAB10, HSPH1, DNM2, SPAG9, CTSD, CNP, SEC13, COPB1, CLTC, RPS27A, COPG2, BSG, SEC24A, HYOU1, MYOF, YWHAQ, HSP90AA1, PDIA6, AP3B1, SEC24C, RAB1B, RAB7A, ACTN4, FASN, RAC1, TMED10, PDIA3, SLC1A5, YKT6, ANXA2, COPE, ESD, AP2B1, ANXA1, AP1M1, CLTCL1, GNAI3, GOSR2, YWHAE, AP2M1, SCYL1, AP1G1, ARCN1, DNM1L, AP1B1, SEC2…
mitochondrial outer membrane	0.000172803	GO:0005741	24	10.7467	160	COASY, DDX3X, AGK, VAT1, PHB2, CNP, ASS1, CYB5R3, ACSL3, PGAM5, DNM1L, ACSL4, HK1, CISD2, TOMM40, BAX, MTCH2, TOMM22, TOMM70, VDAC3, HADHB, TIGAR, RHOT2, TOMM34
nuclear replication fork	0.000189787	GO:0043596	10	2.6195	39	SMARCA5, CDC5L, PCNA, POLA2, RPA1, POLD1, MCM3, POLA1, TOP1, PRPF19
actin filament bundle	0.000195831	GO:0032432	12	3.627	54	SEPT9, ACTN4, MYL12B, CORO1B, MYH9, FLNB, ACTN1, MYH10, ILK, SEPT11, FSCN1, SEPT7
small nucleolar ribonucleoprotein complex	0.000215794	GO:0005732	7	1.34333	20	POP1, SNRNP40, NOP56, DKC1, NOP58, SNRPF, FBL
protein phosphatase type 2A complex	0.000215794	GO:0000159	7	1.34333	20	PPP2R1A, PTPA, PPP2CB, PPP2R5C, CYCS, PPP2R2A, PPP2R5D
cytoplasmic microtubule	0.000235357	GO:0005881	12	3.69417	55	MAPRE1, BYSL, ARL3, SRPRB, TUBGCP2, CLASP1, TUBG1, TMEM214, NUMA1, TUBA1A, TUBA1B, PAFAH1B1
lipid particle	0.000236661	GO:0005811	13	4.2315	63	CYB5R3, ACSL3, RAB7A, ANXA2, ACSL4, RAP1B, SIGMAR1, EHD1, NSDHL, VCP, RAB5C, PRPF19, TRAP1
ruffle membrane	0.000248219	GO:0032587	15	5.37333	80	EZR, EEF1A1, DNM2, HSP90AA1, RAC1, TWF1, DIAPH1, CFL1, EPS8L2, IFIT5, MYO6, ARHGEF2, TLN1, RPS3, ARF4
condensin complex	0.000272127	GO:0000796	4	0.403	6	NCAPD2, SMC2, NCAPG, SMC4
signal recognition particle, endoplasmic reticulum targeting	0.000272127	GO:0005786	4	0.403	6	SRP54, SRP68, SRP14, SRP72
paraspeckles	0.000272127	GO:0042382	4	0.403	6	PSPC1, SFPQ, HNRNPM, NONO
DNA replication factor C complex	0.000272127	GO:0005663	4	0.403	6	PCNA, RFC5, RFC2, RFC3
signal recognition particle	0.000272127	GO:0048500	4	0.403	6	SRP54, SRP68, SRP14, SRP72
phenylalanine-tRNA ligase complex	0.000302307	GO:0009328	3	0.2015	3	FARSA, LRRC47, FARSB
eukaryotic translation initiation factor 2 complex	0.000302307	GO:0005850	3	0.2015	3	EIF2A, EIF2S1, EIF2S2
supraspliceosomal complex	0.000302307	GO:0044530	3	0.2015	3	RBMX, UPF1, ADAR
Golgi-associated vesicle membrane	0.000393592	GO:0030660	11	3.35833	50	COPB2, COPB1, CLTC, COPG2, COPE, CLTCL1, SCYL1, ARCN1, COPG1, AP2A1, COPA
clathrin coat of coated pit	0.000403993	GO:0030132	6	1.07467	16	CLTC, AP2B1, AP2M1, PICALM, AP2A2, AP2A1
nuclear outer membrane-endoplasmic reticulum membrane network	0.000414675	GO:0042175	95	67.5025	1005	XPO1, HSD17B12, SEC31A, NCLN, COPB2, RAB10, MTDH, NUP153, SEC13, COPB1, COPG2, SSR1, SEC24A, MOGS, RTCB, CYB5R3, PDCD6, ACSL3, STIM1, PDIA6, SEC24C, RAB1B, RAC1, TMED10, RPN2, UCHL1, ASPH, DAD1, COPE, DPM1, ALDH3A2, NUP210, TMPO, GOSR2, ARCN1, LRRC59, EIF5A, ACSL4, SRPRB, SEC24B, LBR, ANXA7, SEC23A, KTN1, SGPL1, EMC1, CISD2, SIGMAR1, HACD3, STT3B, FKBP10, TMEM33, COPG1, SEC23B, VAPA, HLA-C, BAX, …
U4/U6 x U5 tri-snRNP complex	0.000421886	GO:0046540	7	1.47767	22	SART1, PRPF31, SNRPB, PRPF6, SNRPE, SNRPD2, SART3
AP-2 adaptor complex	0.000444761	GO:0030122	5	0.738834	11	AP2B1, AP2M1, PICALM, AP2A2, AP2A1
endolysosome membrane	0.000444761	GO:0036020	5	0.738834	11	CLTC, AP2B1, AP2M1, AP2A2, AP2A1
endoplasmic reticulum chaperone complex	0.000444761	GO:0034663	5	0.738834	11	HYOU1, PDIA6, PPIB, DNAJC10, HSP90B1
microtubule organizing center	0.000444844	GO:0005815	64	41.8448	623	EZR, CFAP20, KIF5B, CKAP5, AAAS, PSMB5, DNM2, SPAG9, MAPRE1, NPM1, MDH1, SLC16A1, ARL3, C14orf166, CDK2, UBR4, FLII, NUBP2, MAPK1, PCNA, GNAI3, CHD4, SCYL1, RUVBL1, TUBGCP2, G6PD, CSNK1A1, DIAPH1, CCT5, TCP1, HSPA1A, NCAPG, DYNC1I2, DYNC1H1, CLASP1, KRT18, DYNLL1, TUBG1, RBM39, DCTN1, RPS7, NUP107, MCM3, DCTN2, CCT4, RAN, RPRD1B, CDK1, TLN1, PSMA1, PDCD6IP, KIAA0368, VPS4A, RAB11B, DYNC1LI1, NUMA…
cytoplasmic vesicle	0.000472342	GO:0031410	114	84.0927	1252	ANXA3, SPTBN2, SLIRP, ATP6V1B2, YWHAB, HSP90AB1, SEC31A, KIF5B, AP3M1, COPB2, ANXA6, RAB10, HSPH1, DNM2, SPAG9, CTSD, CNP, SEC13, COPB1, CLTC, RPS27A, COPG2, BSG, SEC24A, HYOU1, MYOF, PDCD6, YWHAQ, HSP90AA1, PDIA6, AP3B1, SEC24C, RAB1B, RAB7A, ACTN4, FASN, RAC1, TMED10, PDIA3, SLC1A5, YKT6, ANXA2, COPE, ESD, AP2B1, ANXA1, AP1M1, CLTCL1, GNAI3, GOSR2, YWHAE, AP2M1, SCYL1, AP1G1, ARCN1, DNM1L, AP1B…
intracellular vesicle	0.000501178	GO:0097708	114	84.227	1254	ANXA3, SPTBN2, SLIRP, ATP6V1B2, YWHAB, HSP90AB1, SEC31A, KIF5B, AP3M1, COPB2, ANXA6, RAB10, HSPH1, DNM2, SPAG9, CTSD, CNP, SEC13, COPB1, CLTC, RPS27A, COPG2, BSG, SEC24A, HYOU1, MYOF, PDCD6, YWHAQ, HSP90AA1, PDIA6, AP3B1, SEC24C, RAB1B, RAB7A, ACTN4, FASN, RAC1, TMED10, PDIA3, SLC1A5, YKT6, ANXA2, COPE, ESD, AP2B1, ANXA1, AP1M1, CLTCL1, GNAI3, GOSR2, YWHAE, AP2M1, SCYL1, AP1G1, ARCN1, DNM1L, AP1B…
endoplasmic reticulum-Golgi intermediate compartment	0.000540348	GO:0005793	17	6.98534	104	COPB1, GOLGB1, PDIA6, RAB1B, TMED10, RER1, YKT6, GOSR2, SCYL1, HMGB1, FN1, SEC23B, SURF4, SEC22B, KIAA0368, SERPINH1, LMAN1
clathrin vesicle coat	0.000571533	GO:0030125	7	1.54483	23	CLTC, AP2B1, CLTCL1, AP2M1, PICALM, AP2A2, AP2A1
CHD-type complex	0.000588927	GO:0090545	6	1.14183	17	RBBP7, CHD4, CSNK2A1, MTA2, HDAC2, RBBP4
NuRD complex	0.000588927	GO:0016581	6	1.14183	17	RBBP7, CHD4, CSNK2A1, MTA2, HDAC2, RBBP4
commitment complex	0.00060071	GO:0000243	4	0.470167	7	U2AF2, SNRPD1, SNRPD3, SNRNP70
mitochondrial proton-transporting ATP synthase complex, coupling factor F(o)	0.00060071	GO:0000276	4	0.470167	7	ATP5F1, ATP5L, ATP5H, ATP5J2
U7 snRNP	0.00060071	GO:0005683	4	0.470167	7	SNRPB, SNRPD3, SNRPE, SNRPF
ruffle	0.000687642	GO:0001726	22	10.4108	155	ATP6V1B2, EZR, EEF1A1, DNM2, HSP90AA1, RAC1, TWF1, ANXA2, IQGAP1, MYH9, ACTN1, DIAPH1, CFL1, EPS8L2, IFIT5, MYO6, ARHGEF2, PLCG1, TLN1, FSCN1, RPS3, ARF4
clathrin coat of endocytic vesicle	0.000720302	GO:0030128	5	0.806	12	AP2B1, AP2M1, PICALM, AP2A2, AP2A1
endomembrane system	0.000735095	GO:0012505	299	254.293	3786	ANXA3, ARF5, SPTBN2, GAPVD1, IPO5, XPO1, KRT2, MYO1B, HSD17B12, SLIRP, ATP6V1B2, EZR, IPO7, SEH1L, PRMT5, SEC31A, IPO9, AP3M1, ARF3, NCLN, MSH6, COPB2, ANXA6, AAAS, SRP68, RAB10, MTDH, RPL10, VTA1, DNM2, SPAG9, MAPRE1, XPO7, NUP153, CCDC47, NUP133, SEC13, LEMD3, ZC3HAV1, COPB1, STIP1, CLTC, VPS26A, RPS27A, TNPO3, SYNCRIP, COPG2, SSR1, BSG, TBC1D15, SEC24A, PDXDC1, HYOU1, MOGS, MYOF, ASS1, GOLGB1,…
preribosome, large subunit precursor	0.000760447	GO:0030687	7	1.612	24	MRTO4, RPLP2, RRP1B, EIF6, PES1, ZNF622, RPLP0
transcription export complex	0.00110586	GO:0000346	5	0.873167	13	POLDIP3, THOC2, DDX39B, CHTOP, ALYREF
endoplasmic reticulum membrane	0.00112504	GO:0005789	91	66.1592	985	HSD17B12, SEC31A, NCLN, COPB2, RAB10, MTDH, SEC13, COPB1, COPG2, SSR1, SEC24A, MOGS, RTCB, CYB5R3, PDCD6, ACSL3, STIM1, PDIA6, SEC24C, RAB1B, RAC1, TMED10, RPN2, UCHL1, ASPH, DAD1, COPE, DPM1, ALDH3A2, NUP210, TMPO, GOSR2, ARCN1, LRRC59, EIF5A, ACSL4, SRPRB, SEC24B, LBR, ANXA7, SEC23A, KTN1, SGPL1, EMC1, CISD2, SIGMAR1, HACD3, STT3B, FKBP10, TMEM33, COPG1, SEC23B, VAPA, HLA-C, BAX, HLA-B, GALNT2,…
GAIT complex	0.0011282	GO:0097452	3	0.268667	4	RPL13A, SYNCRIP, EPRS
alpha DNA polymerase:primase complex	0.0011282	GO:0005658	3	0.268667	4	POLA2, MCM3, POLA1
annulate lamellae	0.0011282	GO:0005642	3	0.268667	4	XPO1, NUP153, EIF5A
nuclear pore cytoplasmic filaments	0.0011282	GO:0044614	3	0.268667	4	NUP98, RANBP2, RANGAP1
retromer, cargo-selective complex	0.0011282	GO:0030906	3	0.268667	4	VPS26A, VPS35, VPS29
nucleocytoplasmic shuttling complex	0.0011282	GO:0031074	3	0.268667	4	RAN, XPO5, MYBBP1A
pyruvate dehydrogenase complex	0.00113639	GO:0045254	4	0.537333	8	PDHA1, DLAT, DLD, PDHB
costamere	0.00115015	GO:0043034	6	1.27617	19	PLEC, AHNAK, FLNC, FXR1, ILK, KRT8
membrane region	0.00119924	GO:0098589	40	24.18	360	LDHB, XPO1, EZR, DNM2, NUP153, CTSD, CLTC, BSG, AHNAK, MYOF, EEF2, ANXA2, MAPK1, CAPN2, AP2B1, CLTCL1, GNAI3, AP2M1, CORO1C, DNM1L, EIF5A, HK1, STOML2, PICALM, RAP1B, AP2A2, PGK1, MYO6, MAPK3, HSPD1, AP2A1, EFHD2, SLC2A1, LAMP2, SERPINH1, CTNNA1, ATP1A1, GNAI2, PRKAR2A, CSK
transport vesicle	0.00120001	GO:0030133	38	22.6352	337	SPTBN2, SEC31A, COPB2, SEC13, COPB1, CLTC, COPG2, SEC24A, SEC24C, RAB1B, TMED10, YKT6, COPE, CLTCL1, GOSR2, ARCN1, DNM1L, SEC24B, SEC23A, COPG1, SEC23B, TMEM30A, HLA-C, ERP29, HLA-B, USO1, SURF4, SAR1B, AIMP1, AP2A1, COPA, SEC22B, KIAA0368, RAB11B, RAB9A, LMAN1, RAB6A, COPS4
chromatin	0.00120568	GO:0000785	47	29.6877	442	RBMX, TRIM28, MSH6, HMGB2, SMARCA4, PDS5A, HIST1H4A, SFPQ, HNRNPK, MRE11A, HIST1H2AG, HNRNPC, IPO4, CAPN2, EIF3E, UPF1, CHD4, PSIP1, TMPO, HAT1, RUVBL1, WDR61, RRP1B, CBX3, TCP1, STAG2, CDK4, HIST1H2BK, CSNK2A1, TARDBP, MCM7, ACTL6A, RAD50, RUVBL2, STAT1, MTA2, HIST1H1C, RAN, POLA1, HDAC2, HIST1H2BJ, DNMT1, CCAR2, SMARCC1, MCM2, SMC3, RBBP4
cell body	0.00128231	GO:0044297	51	32.9788	491	ANXA3, SPTBN2, NAXE, EZR, SLC38A2, CNN3, DPYSL2, CCT3, EEF1A2, SYNCRIP, ASS1, HCFC1, HSP90AA1, CCT7, GTF2I, UCHL1, PPP1CA, YKT6, EIF4A3, MAPK1, TUBB3, RRM1, TUBB4A, ACSL4, ADNP, PICALM, CAD, MYH10, CCT5, TCP1, ATXN10, ILK, PPP5C, ARHGEF2, PMM2, RACK1, CCT4, RPS6, TUBB, FLNA, GOT2, STAU1, DNMT1, TOP1, NUMA1, GNB1, CCT8, MAGOHB, PAFAH1B1, GNAI2, CCT2
nuclear replisome	0.001284	GO:0043601	7	1.74633	26	CDC5L, POLA2, RPA1, POLD1, MCM3, POLA1, PRPF19
transferase complex	0.00146887	GO:1990234	67	46.345	690	TRMT6, PRMT5, NAA50, PRPS1, CAB39, RBBP7, MAT2B, PFKL, SKP1, CUL2, HCFC1, CDK2, PRPF31, RPN2, PPP1CB, CAND1, PPP1CA, CUL3, DAD1, UBE2I, DPM1, PRPSAP2, USP47, DCUN1D5, UBE2V1, UBAP2L, PRKAG1, RUVBL1, WDR61, CDK9, DLD, HSPA1A, POLA2, CDK4, STT3B, MAT2A, WDR5, NAA10, POLD1, MYO6, ACTL6A, PUF60, NAA15, RUVBL2, MCM3, CDC73, POLR2B, HSPD1, CUL4B, RPRD1B, POLA1, RPN1, HDAC2, CUL1, BCCIP, DNAJA1, SPCS2, …
endoplasmic reticulum part	0.00147996	GO:0044432	104	78.0477	1162	HSD17B12, SEC31A, NCLN, COPB2, RAB10, MTDH, SEC13, COPB1, COPG2, SSR1, SEC24A, HYOU1, MOGS, RTCB, CYB5R3, PDCD6, ACSL3, STIM1, PDIA6, KPNB1, SEC24C, RAB1B, RAC1, TMED10, PDIA3, RPN2, UCHL1, ASPH, DAD1, COPE, ESD, CAPN2, DPM1, ALDH3A2, NUP210, TMPO, GOSR2, ARCN1, LRRC59, EIF5A, ACSL4, SRPRB, SEC24B, LBR, ANXA7, SEC23A, KTN1, SGPL1, EMC1, CISD2, GANAB, SIGMAR1, HACD3, STT3B, PPIB, FKBP10, TMEM33, C…
centrosome	0.00159745	GO:0005813	50	32.5087	484	CFAP20, CKAP5, AAAS, PSMB5, DNM2, MAPRE1, NPM1, MDH1, SLC16A1, ARL3, CDK2, UBR4, NUBP2, PCNA, GNAI3, CHD4, TUBGCP2, G6PD, CSNK1A1, CCT5, TCP1, HSPA1A, NCAPG, DYNC1I2, DYNC1H1, CLASP1, KRT18, DYNLL1, TUBG1, DCTN1, NUP107, MCM3, DCTN2, CCT4, RAN, RPRD1B, CDK1, PSMA1, KIAA0368, VPS4A, DYNC1LI1, NUMA1, CCT8, DHX9, APEX1, ACTR1A, OLA1, PAFAH1B1, GNAI2, PRKAR2A
respiratory chain complex I	0.00159912	GO:0045271	9	2.821	42	NDUFC2, NDUFA9, NDUFA13, NDUFB4, NDUFA4, NDUFS2, NDUFA10, NDUFV1, NDUFS1
NADH dehydrogenase complex	0.00159912	GO:0030964	9	2.821	42	NDUFC2, NDUFA9, NDUFA13, NDUFB4, NDUFA4, NDUFS2, NDUFA10, NDUFV1, NDUFS1
mitochondrial respiratory chain complex I	0.00159912	GO:0005747	9	2.821	42	NDUFC2, NDUFA9, NDUFA13, NDUFB4, NDUFA4, NDUFS2, NDUFA10, NDUFV1, NDUFS1
transport vesicle membrane	0.00163813	GO:0030658	21	10.4108	155	SEC31A, SEC13, CLTC, SEC24A, SEC24C, TMED10, CLTCL1, GOSR2, DNM1L, SEC24B, SEC23A, SEC23B, TMEM30A, HLA-C, HLA-B, USO1, SAR1B, AP2A1, SEC22B, RAB11B, LMAN1
endoplasmic reticulum exit site	0.00194062	GO:0070971	4	0.6045	9	SEC31A, PDCD6, VAPA, PDCD6IP
cell projection	0.00197564	GO:0042995	149	118.885	1770	SPTBN1, ANXA3, AK2, PDLIM5, NAXE, MYO1B, SLIRP, ATP6V1B2, GNAS, EZR, HSP90AB1, SLC38A2, CFAP20, CNN3, KIF5B, USP9X, AP3M1, DPYSL2, RAB10, EEF1A1, DNM2, MAPRE1, SCRIB, CNP, ATP6V1A, CTNND1, BYSL, SORD, HNRNPK, SEPT9, SYNCRIP, MPST, HNRNPA3, GLRX3, WDR1, SEPT2, ASS1, ACTR3, HCFC1, HSP90AA1, ARL3, AP3B1, PKM, RAB7A, ACTN4, GTF2I, RAC1, ACTR2, UCHL1, NSF, PPP1CA, VIM, PFN1, NUBP2, YKT6, EIF4A3, TWF1,…
actin filament	0.00225263	GO:0005884	12	4.70167	70	MYO1B, DNAJA3, EZR, CAPZB, WDR1, RAC1, IQGAP1, CORO1B, ACTN1, ACTG1, MYO6, FLNA
nuclear cyclin-dependent protein kinase holoenzyme complex	0.0023037	GO:0019908	5	1.0075	15	CDK9, PUF60, HSPD1, BCCIP, CDK13
SWI/SNF superfamily-type complex	0.00254855	GO:0070603	12	4.76883	71	SMARCA4, SMARCA5, RBBP7, CHD4, RUVBL1, CSNK2A1, ACTL6A, RUVBL2, MTA2, HDAC2, SMARCC1, RBBP4
cytoplasmic mRNA processing body	0.00254855	GO:0000932	12	4.76883	71	DDX6, CNOT9, CNOT1, PSMA4, PSMC3, UPF1, EDC4, PSMC2, TOP1, PSMA2, CAPRIN1, YTHDF2
nuclear transcriptional repressor complex	0.00265832	GO:0090568	6	1.47767	22	RBBP7, CHD4, CSNK2A1, MTA2, HDAC2, RBBP4
NatA complex	0.00272599	GO:0031415	3	0.335833	5	NAA50, NAA10, NAA15
septin complex	0.00272599	GO:0031105	3	0.335833	5	SEPT9, SEPT2, SEPT7
nuclear pore nuclear basket	0.00272599	GO:0044615	3	0.335833	5	NUP153, NUP98, RANBP2
septin cytoskeleton	0.00272599	GO:0032156	3	0.335833	5	SEPT9, SEPT2, SEPT7
endolysosome	0.00316639	GO:0036019	5	1.07467	16	CLTC, AP2B1, AP2M1, AP2A2, AP2A1
condensed chromosome, centromeric region	0.0032792	GO:0000779	15	6.851	102	SEH1L, BUB3, NUP133, SEPT2, MAD2L1, NCAPD2, SMC1A, CBX3, CSNK1A1, CLASP1, NUP107, DYNC1LI1, NUP85, SEPT7, RANGAP1
mitotic spindle	0.00328373	GO:0072686	10	3.69417	55	MAD2L1, MAPK1, MAP4, DIAPH1, DYNLL1, RCC2, CDK1, NUMA1, RPS3, RANGAP1
endoplasmic reticulum	0.00373767	GO:0005783	136	109.079	1624	HSD17B12, SEC31A, NCLN, COPB2, SRP68, RAB10, MTDH, RPL10, CCDC47, SEC13, COPB1, SYNCRIP, COPG2, SSR1, SEC24A, HYOU1, MOGS, ASS1, RTCB, CYB5R3, PDCD6, ACSL3, STIM1, PDIA6, KPNB1, SEC24C, RAB1B, RAC1, TMED10, PDIA3, RPN2, UCHL1, SRPK1, ASPH, YKT6, DAD1, SRP72, COPE, ESD, CAPN2, DPM1, ALDH3A2, NUP210, TMPO, GOSR2, PSMG1, ARCN1, LRRC59, EIF5A, ACSL4, SRPRB, SEC24B, LBR, EEF1B2, ANXA7, SEC23A, KTN1, S…
clathrin-coated endocytic vesicle	0.00375099	GO:0045334	11	4.36583	65	DNM2, CLTC, AP2B1, AP1M1, AP2M1, AP1G1, AP1B1, PICALM, AP2A2, MYO6, AP2A1
bounding membrane of organelle	0.00377989	GO:0098588	141	113.646	1692	ANXA3, SPTBN2, MYO1B, ATP6V1B2, AGPS, COASY, IMPDH2, SEC31A, AP3M1, ARF3, COPB2, ANXA6, DDX3X, AGK, VAT1, RAB10, VTA1, EEF1A1, PHB2, DNM2, CNP, EEF1A2, ATP6V1A, SEC13, COPB1, CLTC, VPS26A, RPS27A, COPG2, BSG, SEC24A, AHNAK, SEPT2, ASS1, GOLGB1, CYB5R3, ACSL3, ARL3, STIM1, AP3B1, PGAM5, SEC24C, RAB1B, RAB7A, ARL1, RAC1, TMED10, RPN2, ATP6V1H, NSF, ASPH, CUL3, RER1, YKT6, ANXA2, COPE, AP2B1, ALDH3A…
cyclin-dependent protein kinase holoenzyme complex	0.00382241	GO:0000307	7	2.08217	31	CDK2, CDK9, CDK4, PUF60, HSPD1, BCCIP, CDK13
protein serine/threonine phosphatase complex	0.00418809	GO:0008287	9	3.224	48	PPP2R1A, PPP1CB, PPP1CA, PTPA, PPP2CB, PPP2R5C, CYCS, PPP2R2A, PPP2R5D
clathrin-coated endocytic vesicle membrane	0.00418809	GO:0030669	9	3.224	48	CLTC, AP2B1, AP1M1, AP2M1, AP1G1, AP1B1, PICALM, AP2A2, AP2A1
phosphatase complex	0.00418809	GO:1903293	9	3.224	48	PPP2R1A, PPP1CB, PPP1CA, PTPA, PPP2CB, PPP2R5C, CYCS, PPP2R2A, PPP2R5D
cortical actin cytoskeleton	0.00429611	GO:0030864	10	3.8285	57	SPTBN1, SPTBN2, EEF1A1, ACTR2, CAPN2, CAP1, MYH9, DSTN, SLC2A1, SPTAN1
proteasome storage granule	0.00450786	GO:0034515	2	0.134333	2	PSMD1, PSMD2
cortical microtubule cytoskeleton	0.00450786	GO:0030981	2	0.134333	2	MAPRE1, CLASP1
cohesin core heterodimer	0.00450786	GO:0008280	2	0.134333	2	SMC1A, SMC3
SUMO activating enzyme complex	0.00450786	GO:0031510	2	0.134333	2	UBA2, SAE1
methionine adenosyltransferase complex	0.00450786	GO:0048269	2	0.134333	2	MAT2B, MAT2A
MutSalpha complex	0.00450786	GO:0032301	2	0.134333	2	MSH6, MSH2
mitochondrial degradosome	0.00450786	GO:0045025	2	0.134333	2	PNPT1, SUPV3L1
cytoplasmic side of lysosomal membrane	0.00450786	GO:0098574	2	0.134333	2	EEF1A1, EEF1A2
RNA nuclear export complex	0.00450786	GO:0042565	2	0.134333	2	RAN, XPO5
endoplasmic reticulum tubular network	0.00455828	GO:0071782	4	0.738834	11	RAB10, STIM1, KPNB1, ASPH
proton-transporting ATP synthase complex, coupling factor F(o)	0.00455828	GO:0045263	4	0.738834	11	ATP5F1, ATP5L, ATP5H, ATP5J2
cluster of actin-based cell projections	0.00510679	GO:0098862	18	9.269	138	MYO1B, EZR, HSP90AB1, SLC38A2, PLEC, ACTR3, HSP90AA1, ACTN4, FLII, MYL12B, DNM1L, MYH9, FLNB, ACTN1, CAPZA2, MYH10, CLIC1, MYL6
box C/D snoRNP complex	0.00517479	GO:0031428	3	0.403	6	NOP56, NOP58, FBL
histone pre-mRNA 3'end processing complex	0.00517479	GO:0071204	3	0.403	6	SYNCRIP, YBX1, SNRPB
Ctf18 RFC-like complex	0.00517479	GO:0031390	3	0.403	6	RFC5, RFC2, RFC3
proton-transporting ATP synthase complex, catalytic core F(1)	0.00517479	GO:0045261	3	0.403	6	ATP5A1, ATP5B, ATP5C1
clathrin-coated pit	0.00534837	GO:0005905	11	4.56733	68	DNM2, CLTC, AP2B1, CLTCL1, AP2M1, DNM1L, PICALM, AP2A2, MYO6, HSPD1, AP2A1
endocytic vesicle membrane	0.00695738	GO:0030666	19	10.2765	153	ANXA3, RAB10, DNM2, CLTC, RPS27A, RAB7A, AP2B1, AP1M1, AP2M1, AP1G1, AP1B1, PICALM, AP2A2, HLA-C, HLA-B, AP2A1, LAMP2, RAB11B, RAB9A
endocytic vesicle	0.00710991	GO:0030139	28	17.1275	255	ANXA3, KIF5B, RAB10, HSPH1, DNM2, CLTC, RPS27A, HYOU1, HSP90AA1, RAB7A, AP2B1, AP1M1, AP2M1, AP1G1, AP1B1, RAB5B, PICALM, AP2A2, HLA-C, HLA-B, MYO6, AP2A1, RAB5C, KIAA0368, LAMP2, RAB11B, RAB9A, HSP90B1
midbody	0.00724543	GO:0030496	17	8.866	132	DNM2, CTNND1, SEPT2, ARL3, ANXA2, IQGAP1, GNAI3, MYH10, RCC2, RACK1, RAN, CDK1, SLC2A1, VPS4A, SEPT7, HSP90B1, GNAI2
histone methyltransferase complex	0.00743934	GO:0035097	11	4.76883	71	PRMT5, RBBP7, HCFC1, PRPF31, PPP1CB, PPP1CA, RUVBL1, WDR5, RUVBL2, HDAC2, RBBP4
somatodendritic compartment	0.00754776	GO:0036477	60	43.6583	650	ANXA3, SPTBN2, GNAS, SLC38A2, CNN3, DPYSL2, EEF1A2, CTNND1, HNRNPK, SYNCRIP, GLRX3, ASS1, HCFC1, HSP90AA1, GTF2I, UCHL1, NSF, PPP1CA, YKT6, EIF4A3, MAPK1, CAPN2, TUBB3, RRM1, TUBB4A, ACSL4, ADNP, PICALM, CAD, MYH10, ATXN10, FXR1, ILK, CLU, PPP5C, SEPT11, DBN1, STAT1, ARHGEF2, PMM2, RACK1, RPS6, FLNA, GOT2, STAU1, IGF2BP1, MAP1B, DNMT1, ACAD9, KPNA1, TOP1, CAPRIN1, NUMA1, GNB1, ARF4, MAGOHB, PAFAH…
clathrin-coated vesicle membrane	0.00761477	GO:0030665	12	5.4405	81	CLTC, AP3B1, AP2B1, AP1M1, CLTCL1, AP2M1, AP1G1, AP1B1, PICALM, AP2A2, MYO6, AP2A1
nucleolar part	0.00790265	GO:0044452	10	4.16433	62	POP1, EIF3L, NOP56, PES1, NOL6, DKC1, NOP58, NCL, POLR2H, FBL
Golgi-associated vesicle	0.00839012	GO:0005798	12	5.50767	82	COPB2, COPB1, CLTC, COPG2, TMED10, COPE, CLTCL1, SCYL1, ARCN1, COPG1, AP2A1, COPA
leading edge membrane	0.00839426	GO:0031256	17	9.00034	134	SPTBN1, EZR, EEF1A1, DNM2, HSP90AA1, RAC1, TWF1, DIAPH1, CFL1, EPB41L3, EPS8L2, IFIT5, MYO6, ARHGEF2, TLN1, RPS3, ARF4
glycogen granule	0.00861774	GO:0042587	3	0.470167	7	FASN, PPP1CB, PPP1CA
Prp19 complex	0.00886044	GO:0000974	4	0.873167	13	CTNNBL1, U2AF2, CDC5L, PRPF19
retromer complex	0.00898767	GO:0030904	5	1.34333	20	VPS26A, RAB7A, DCTN1, VPS35, VPS29
condensed chromosome kinetochore	0.00911845	GO:0000777	13	6.2465	93	SEH1L, BUB3, NUP133, SEPT2, MAD2L1, SMC1A, CSNK1A1, CLASP1, NUP107, DYNC1LI1, NUP85, SEPT7, RANGAP1
nuclear inner membrane	0.00927101	GO:0005637	9	3.627	54	LEMD3, TMPO, LBR, CBX3, SIGMAR1, LMNB1, EMD, LRPPRC, MATR3
