# Supplementary material for: Cell-based HTS identifies a chemical chaperone for preventing ER protein aggregation and proteotoxicity
Source: eLife journal article supplement (doi:10.7554/elife.43302), 2019-12-16
Supplement: supp [file elife-43302-supp-v1.zip › elife_poa_e43302_Figure_6_figure_supplement_1_source_data_3.xlsx]

## Sheet: Figure 6 Supplement 1C
GO-Term	P-value	GO-Term id	# Genes (observed)	# Genes (expected)	# Genes (total)	List of observed genes
mRNA metabolic process	1.13136e-86	GO:0016071	210	45.6252	642	SSB, RBMX, PARN, RPL13, RPL13A, DDX6, PPP2R1A, RPS14, SNRNP200, RPL26, PRMT5, SRSF2, GSPT1, HNRNPD, SRSF7, SRSF5, HNRNPH1, RBM4, CNOT9, CNOT1, CSTF1, PSPC1, RPL10, SAFB, LUC7L2, SUPT5H, RPS24, CPSF7, RPS3A, RPL23A, RPL34, SRSF6, POLDIP3, SFPQ, ZC3HAV1, HNRNPK, RPL17, RPS27A, RBM25, RPS20, RNH1, CLNS1A, SYNCRIP, RPS13, PNPT1, HNRNPA3, EXOSC2, RPL24, DDX5, SF3A3, CPSF2, RPL18, HNRNPA0, U2AF1, THOC2…
translation	1.1707e-84	GO:0006412	209	46.1937	650	SSB, RSL1D1, FARSA, EIF2A, HARS, DARS2, RPL13, RPL13A, DDX6, RPS14, RPL26, YARS2, GSPT1, HNRNPD, RPS6KA3, RBM4, AARS, EIF4H, CNOT9, CNOT1, EIF3L, DDX3X, LRRC47, RPL10, EEF1A1, GFM1, RPS24, RPS3A, EIF3G, RPL23A, NPM1, RPL34, EEF1A2, POLDIP3, KRT17, RPL17, RPS27A, RPS20, SYNCRIP, RPS13, RPL24, RPL18, RPL5, RPS27, EEF2, PPA2, MRPL47, TUFM, RPL27, PABPC1, MRTO4, RPL12, RPL6, RPL38, PPP1CA, PA2G4, EIF…
peptide biosynthetic process	4.57324e-82	GO:0043043	210	47.9704	675	SSB, RSL1D1, FARSA, EIF2A, HARS, DARS2, RPL13, RPL13A, DDX6, RPS14, RPL26, YARS2, GSPT1, HNRNPD, RPS6KA3, RBM4, AARS, EIF4H, CNOT9, CNOT1, EIF3L, DDX3X, LRRC47, RPL10, EEF1A1, GFM1, RPS24, RPS3A, EIF3G, RPL23A, GSS, NPM1, RPL34, EEF1A2, POLDIP3, KRT17, RPL17, RPS27A, RPS20, SYNCRIP, RPS13, RPL24, RPL18, RPL5, RPS27, EEF2, PPA2, MRPL47, TUFM, RPL27, PABPC1, MRTO4, RPL12, RPL6, RPL38, PPP1CA, PA2G4…
organonitrogen compound metabolic process	6.60232e-82	GO:1901564	398	153.789	2164	LDHB, SSB, LDHA, AK2, RSL1D1, FARSA, PDHA1, SRM, EIF2A, HARS, NDUFC2, DARS2, NAXE, RPL13, RPL13A, TYMS, PSMD3, DDX6, PPP2R1A, RPS14, ATP6V1B2, COASY, GLUD1, RPL26, PSMB2, YARS2, IMPDH2, GSPT1, HNRNPD, ATP5A1, PSMD14, RPS6KA3, GSTP1, RBM4, AARS, PSMD11, EIF4H, CNOT9, CNOT1, EIF3L, DDX3X, ATP5F1, PSMB5, LRRC47, AGK, PRPS1, ATIC, RPL10, ENO1, EEF1A1, GFPT1, PSMA4, SULT1A1, GFM1, RPS24, RPS3A, EIF3G,…
amide biosynthetic process	1.07182e-76	GO:0043604	214	52.8029	743	SSB, RSL1D1, FARSA, EIF2A, HARS, DARS2, RPL13, RPL13A, DDX6, RPS14, RPL26, YARS2, GSPT1, HNRNPD, RPS6KA3, RBM4, AARS, EIF4H, CNOT9, CNOT1, EIF3L, DDX3X, LRRC47, AGK, RPL10, EEF1A1, GFM1, RPS24, RPS3A, EIF3G, RPL23A, GSS, NPM1, RPL34, EEF1A2, POLDIP3, KRT17, RPL17, RPS27A, RPS20, SYNCRIP, RPS13, RPL24, ASS1, RPL18, RPL5, RPS27, EEF2, PPA2, MRPL47, TUFM, RPL27, PABPC1, MRTO4, RPL12, RPL6, RPL38, PP…
peptide metabolic process	6.25941e-76	GO:0006518	224	58.0619	817	SSB, RSL1D1, FARSA, EIF2A, HARS, DARS2, RPL13, RPL13A, DDX6, RPS14, RPL26, YARS2, GSPT1, HNRNPD, RPS6KA3, GSTP1, RBM4, AARS, EIF4H, CNOT9, CNOT1, EIF3L, DDX3X, LRRC47, RPL10, EEF1A1, GFM1, RPS24, RPS3A, EIF3G, RPL23A, GSS, NPM1, RPL34, EEF1A2, POLDIP3, KRT17, RPL17, RPS27A, RPS20, SYNCRIP, RPS13, RPL24, RPL18, RPL5, RPS27, EEF2, PPA2, MRPL47, TUFM, TMED10, RPL27, PABPC1, IDH1, MRTO4, RPL12, RPL6,…
RNA processing	2.79777e-74	GO:0006396	231	62.6102	881	SSB, RBMX, RSL1D1, TRMT6, RPL13, POP1, RPL13A, PPP2R1A, RPS14, SNRNP200, RPL26, PRMT5, SRSF2, HNRNPD, SRSF7, SRSF5, HNRNPH1, RBM4, AARS, CSTF1, PSPC1, RPL10, SAFB, LUC7L2, SUPT5H, RPS24, CPSF7, RPS3A, RPL23A, RPL34, SRSF6, POLDIP3, SFPQ, BYSL, HNRNPK, RPL17, RPS27A, RBM25, RPS20, U2SURP, CLNS1A, SYNCRIP, RPS13, PNPT1, HNRNPA3, EXOSC2, AHNAK, RPL24, DDX5, SF3A3, RTCB, CPSF2, RPL18, HNRNPA0, U2AF1,…
translational initiation	1.04433e-72	GO:0006413	107	13.5028	190	SSB, EIF2A, RPL13, RPL13A, RPS14, RPL26, RBM4, EIF4H, EIF3L, DDX3X, RPL10, RPS24, RPS3A, EIF3G, RPL23A, NPM1, RPL34, RPL17, RPS27A, RPS20, RPS13, RPL24, RPL18, RPL5, RPS27, RPL27, PABPC1, RPL12, RPL6, RPL38, PPP1CA, EIF1AY, RPL9, RPS15, EIF3B, EIF3E, RPS2, EIF4G1, EIF3A, RPL31, RPLP2, RPS4X, RPL35A, RPL7, RPS26, EIF5, RPS23, PTBP1, EIF2S3, RPL35, RPL8, EIF4A1, RPL11, EIF6, RPSA, RPL32, RPS12, RPS…
cellular amide metabolic process	5.41904e-72	GO:0043603	238	67.7981	954	SSB, RSL1D1, FARSA, EIF2A, HARS, DARS2, NAXE, RPL13, RPL13A, DDX6, PPP2R1A, RPS14, RPL26, YARS2, GSPT1, HNRNPD, RPS6KA3, GSTP1, RBM4, AARS, EIF4H, CNOT9, CNOT1, EIF3L, DDX3X, LRRC47, AGK, RPL10, EEF1A1, GFM1, RPS24, RPS3A, EIF3G, RPL23A, GSS, NPM1, RPL34, DHFR, EEF1A2, POLDIP3, KRT17, RPL17, RPS27A, RPS20, SYNCRIP, RPS13, RPL24, SHMT1, ASS1, RPL18, RPL5, RPS27, EEF2, PPA2, MRPL47, TUFM, TMED10, R…
symbiosis, encompassing mutualism through parasitism	2.5021e-68	GO:0044403	247	75.4023	1061	SSB, IPO5, XPO1, RPL13, RPL13A, TYMS, DDX6, RPS14, IPO7, YWHAB, HSP90AB1, SEH1L, TRIM28, RPL26, PSMB2, MSH6, EIF4H, TRIM25, EIF3L, AAAS, DDX3X, PSMB5, SMARCA4, RPL10, VTA1, ENO1, PSMA4, SUPT5H, RPS24, NUP153, RPS3A, EIF3G, SCRIB, RPL23A, NPM1, NUP133, CTBP2, RPL34, ZC3HAV1, HNRNPK, COPB1, MRE11A, PAK2, ABCF3, RPL17, RPS27A, RPS20, PSMA7, SYNCRIP, RPS13, CUL2, RPL24, DDX5, MDH1, RPL18, HCFC1, THOC…
interspecies interaction between organisms	2.5021e-68	GO:0044419	247	75.4023	1061	SSB, IPO5, XPO1, RPL13, RPL13A, TYMS, DDX6, RPS14, IPO7, YWHAB, HSP90AB1, SEH1L, TRIM28, RPL26, PSMB2, MSH6, EIF4H, TRIM25, EIF3L, AAAS, DDX3X, PSMB5, SMARCA4, RPL10, VTA1, ENO1, PSMA4, SUPT5H, RPS24, NUP153, RPS3A, EIF3G, SCRIB, RPL23A, NPM1, NUP133, CTBP2, RPL34, ZC3HAV1, HNRNPK, COPB1, MRE11A, PAK2, ABCF3, RPL17, RPS27A, RPS20, PSMA7, SYNCRIP, RPS13, CUL2, RPL24, DDX5, MDH1, RPL18, HCFC1, THOC…
viral process	2.81657e-68	GO:0016032	243	73.2703	1031	SSB, IPO5, XPO1, RPL13, RPL13A, TYMS, DDX6, RPS14, IPO7, YWHAB, HSP90AB1, SEH1L, TRIM28, RPL26, PSMB2, MSH6, EIF4H, TRIM25, EIF3L, AAAS, DDX3X, PSMB5, SMARCA4, RPL10, VTA1, ENO1, PSMA4, SUPT5H, RPS24, NUP153, RPS3A, EIF3G, SCRIB, RPL23A, NPM1, NUP133, CTBP2, RPL34, ZC3HAV1, HNRNPK, COPB1, MRE11A, PAK2, ABCF3, RPL17, RPS27A, RPS20, PSMA7, SYNCRIP, RPS13, CUL2, RPL24, DDX5, MDH1, RPL18, HCFC1, THOC…
multi-organism cellular process	6.42908e-68	GO:0044764	243	73.5546	1035	SSB, IPO5, XPO1, RPL13, RPL13A, TYMS, DDX6, RPS14, IPO7, YWHAB, HSP90AB1, SEH1L, TRIM28, RPL26, PSMB2, MSH6, EIF4H, TRIM25, EIF3L, AAAS, DDX3X, PSMB5, SMARCA4, RPL10, VTA1, ENO1, PSMA4, SUPT5H, RPS24, NUP153, RPS3A, EIF3G, SCRIB, RPL23A, NPM1, NUP133, CTBP2, RPL34, ZC3HAV1, HNRNPK, COPB1, MRE11A, PAK2, ABCF3, RPL17, RPS27A, RPS20, PSMA7, SYNCRIP, RPS13, CUL2, RPL24, DDX5, MDH1, RPL18, HCFC1, THOC…
ribonucleoprotein complex biogenesis	1.64404e-66	GO:0022613	155	32.1224	452	RSL1D1, XPO1, EIF2A, RPL13, RPL13A, DDX6, RPS14, SNRNP200, RPL26, PRMT5, SRSF5, EIF4H, CNOT1, EIF3L, DDX3X, RPL10, LUC7L2, RPS24, RPS3A, EIF3G, RPL23A, NPM1, RPL34, SRSF6, BYSL, RPL17, RPS27A, RPS20, CLNS1A, RPS13, EXOSC2, RPL24, ATXN2L, SF3A3, RPL18, RPL5, RPS27, SART1, PRPF31, RPL27, LUC7L3, MRTO4, RPL12, RPL6, GNL3, RPL38, SF3B1, PA2G4, BRIX1, RPL9, EIF4A3, RPS15, EIF3B, EIF3E, RPS2, SRSF1, NO…
SRP-dependent cotranslational protein targeting to membrane	4.85219e-66	GO:0006614	73	6.60925	93	SRP54, RPL13, RPL13A, RPS14, RPL26, SRP68, RPL10, RPS24, RPS3A, RPL23A, RPL34, RPL17, RPS27A, RPS20, RPS13, RPL24, RPL18, RPL5, RPS27, RPL27, SRP14, RPL12, RPL6, RPL38, RPL9, RPS15, SRP72, RPS2, RPL31, RPLP2, RPS4X, RPL35A, RPL7, RPS26, SRPRB, RPS23, RPL35, RPL8, RPL11, RPSA, RPL32, RPS12, RPS10, RPL4, RPL18A, RPS11, RPS15A, RPL3, RPS7, RPL15, RPS9, RPS19, RPL36, RPL27A, RPL14, RPL23, RPS6, RPS16…
organonitrogen compound biosynthetic process	9.75302e-66	GO:1901566	280	96.5093	1358	SSB, AK2, RSL1D1, FARSA, SRM, EIF2A, HARS, DARS2, RPL13, RPL13A, TYMS, DDX6, RPS14, COASY, GLUD1, RPL26, YARS2, IMPDH2, GSPT1, HNRNPD, ATP5A1, RPS6KA3, GSTP1, RBM4, AARS, EIF4H, CNOT9, CNOT1, EIF3L, DDX3X, ATP5F1, LRRC47, AGK, PRPS1, ATIC, RPL10, EEF1A1, GFM1, RPS24, RPS3A, EIF3G, RPL23A, GSS, NPM1, RPL34, ACOT7, DHFR, EEF1A2, GMPS, POLDIP3, CLTC, KRT17, RPL17, RPS27A, RPS20, SYNCRIP, RPS13, GART…
protein targeting to ER	3.95119e-64	GO:0045047	74	7.03565	99	SRP54, RPL13, RPL13A, RPS14, RPL26, SRP68, RPL10, RPS24, RPS3A, RPL23A, RPL34, RPL17, RPS27A, RPS20, RPS13, RPL24, RPL18, RPL5, RPS27, RPL27, SRP14, RPL12, RPL6, RPL38, RPL9, RPS15, SRP72, RPS2, RPL31, RPLP2, RPS4X, RPL35A, RPL7, RPS26, SRPRB, RPS23, RPL35, RPL8, RPL11, RPSA, RPL32, RPS12, RPS10, RPL4, RPL18A, RPS11, RPS15A, RPL3, RPS7, RPL15, RPS9, RPS19, RPL36, RPL27A, RPL14, RPL23, RPS6, RPS16…
cotranslational protein targeting to membrane	1.41925e-63	GO:0006613	74	7.10672	100	SRP54, RPL13, RPL13A, RPS14, RPL26, SRP68, RPL10, RPS24, RPS3A, RPL23A, RPL34, RPL17, RPS27A, RPS20, SSR1, RPS13, RPL24, RPL18, RPL5, RPS27, RPL27, SRP14, RPL12, RPL6, RPL38, RPL9, RPS15, SRP72, RPS2, RPL31, RPLP2, RPS4X, RPL35A, RPL7, RPS26, SRPRB, RPS23, RPL35, RPL8, RPL11, RPSA, RPL32, RPS12, RPS10, RPL4, RPL18A, RPS11, RPS15A, RPL3, RPS7, RPL15, RPS9, RPS19, RPL36, RPL27A, RPL14, RPL23, RPS6,…
establishment of protein localization to endoplasmic reticulum	1.55198e-63	GO:0072599	75	7.31992	103	SRP54, RPL13, RPL13A, RPS14, RPL26, SRP68, RAB10, RPL10, RPS24, RPS3A, RPL23A, RPL34, RPL17, RPS27A, RPS20, RPS13, RPL24, RPL18, RPL5, RPS27, RPL27, SRP14, RPL12, RPL6, RPL38, RPL9, RPS15, SRP72, RPS2, RPL31, RPLP2, RPS4X, RPL35A, RPL7, RPS26, SRPRB, RPS23, RPL35, RPL8, RPL11, RPSA, RPL32, RPS12, RPS10, RPL4, RPL18A, RPS11, RPS15A, RPL3, RPS7, RPL15, RPS9, RPS19, RPL36, RPL27A, RPL14, RPL23, RPS6…
viral gene expression	5.79632e-62	GO:0019080	97	13.1474	185	SSB, RPL13, RPL13A, RPS14, SEH1L, RPL26, EIF3L, AAAS, SMARCA4, RPL10, SUPT5H, RPS24, NUP153, RPS3A, EIF3G, RPL23A, NUP133, RPL34, RPL17, RPS27A, RPS20, RPS13, RPL24, RPL18, RPL5, RPS27, RPL27, RPL12, RPL6, RPL38, PFN1, RPL9, RPS15, EIF3B, NUP93, RPS2, EIF3A, NUP98, NUP210, RPL31, RPLP2, RPS4X, RPL35A, RPL7, RPS26, RPS23, PTBP1, RPL35, RPL8, CDK9, RPL11, RPSA, RPL32, RPS12, RPS10, RPL4, RAE1, RPL1…
nuclear-transcribed mRNA catabolic process, nonsense-mediated decay	2.18208e-61	GO:0000184	79	8.52807	120	PARN, RPL13, RPL13A, PPP2R1A, RPS14, RPL26, GSPT1, RPL10, RPS24, RPS3A, RPL23A, RPL34, RPL17, RPS27A, RPS20, RPS13, RPL24, RPL18, RPL5, RPS27, RPL27, PABPC1, RPL12, RPL6, RPL38, RPL9, EIF4A3, RPS15, EIF3E, RPS2, UPF1, EIF4G1, RPL31, ETF1, RPLP2, RPS4X, RPL35A, RPL7, RPS26, RPS23, RPL35, RPL8, RPL11, RPSA, RPL32, RPS12, RPS10, RPL4, RPL18A, RPS11, RPS15A, RPL3, RPS7, RPL15, RPS9, RPS19, RPL36, RPL…
intracellular transport	2.98274e-61	GO:0046907	292	108.377	1525	SPTBN1, SRP54, TIMM44, SPTBN2, IPO5, XPO1, TIMM50, RPL13, RPL13A, RPS14, EZR, IPO7, YWHAB, HSP90AB1, SEH1L, TRIM28, RPL26, TUBA1C, SEC31A, PTPN11, SRSF2, KIF5B, ATP5A1, SRSF7, IPO9, SRSF5, AP3M1, RBM4, COPB2, AAAS, HUWE1, ATP5F1, SRP68, RPL10, PHB2, SPAG9, RPS24, XPO7, NUP153, RPS3A, RPL23A, NPM1, NUP133, RPL34, SRSF6, POLDIP3, SEC13, COPB1, CLTC, RPL17, VPS26A, RPS27A, RPS20, TNPO3, COPG2, SSR1,…
cellular nitrogen compound metabolic process	6.72694e-58	GO:0034641	710	447.795	6301	LDHB, SSB, LDHA, RBMX, PARN, ANXA3, AK2, RSL1D1, FARSA, PDHA1, SRM, XPO1, EIF2A, HARS, RNASEH2B, NDUFC2, DARS2, NAXE, DNAJA3, TRMT6, RPL13, POP1, RPL13A, TYMS, PSMD3, DDX6, PPP2R1A, RPS14, SLIRP, ATP6V1B2, GNAS, EZR, FUBP3, SNRNP200, YWHAB, COASY, HSP90AB1, SEH1L, TRIM28, RPL26, PSMB2, PRMT5, YARS2, IMPDH2, G3BP1, SRSF2, GSPT1, USP9X, HNRNPD, ATP5A1, SRSF7, SRSF5, PSMD14, RPS6KA3, GSTP1, MSH6, HN…
protein localization to endoplasmic reticulum	9.4537e-58	GO:0070972	77	8.6702	122	SRP54, RPL13, RPL13A, RPS14, RPL26, SRP68, RAB10, RPL10, RPS24, RPS3A, RPL23A, RPL34, RPL17, RPS27A, RPS20, RPS13, RPL24, RPL18, RPL5, RPS27, RPL27, PDIA3, SRP14, RPL12, RPL6, RPL38, RPL9, RPS15, SRP72, RPS2, RPL31, RPLP2, RPS4X, RPL35A, RPL7, RPS26, SRPRB, RPS23, RPL35, RPL8, RPL11, RPSA, RPL32, RPS12, RPS10, RPL4, RPL18A, RPS11, RPS15A, VAPA, RPL3, RPS7, RPL15, RPS9, RPS19, RPL36, RPL27A, RPL14…
multi-organism metabolic process	2.45153e-57	GO:0044033	97	14.3556	202	SSB, RPL13, RPL13A, RPS14, SEH1L, RPL26, EIF3L, AAAS, SMARCA4, RPL10, SUPT5H, RPS24, NUP153, RPS3A, EIF3G, RPL23A, NUP133, RPL34, RPL17, RPS27A, RPS20, RPS13, RPL24, RPL18, RPL5, RPS27, RPL27, RPL12, RPL6, RPL38, PFN1, RPL9, RPS15, EIF3B, NUP93, RPS2, EIF3A, NUP98, NUP210, RPL31, RPLP2, RPS4X, RPL35A, RPL7, RPS26, RPS23, PTBP1, RPL35, RPL8, CDK9, RPL11, RPSA, RPL32, RPS12, RPS10, RPL4, RAE1, RPL1…
RNA catabolic process	5.20099e-57	GO:0006401	105	17.0561	240	PARN, RNASEH2B, RPL13, POP1, RPL13A, DDX6, PPP2R1A, RPS14, SLIRP, RPL26, GSPT1, HNRNPD, CNOT9, CNOT1, RPL10, RPS24, RPS3A, RPL23A, RPL34, ZC3HAV1, RPL17, RPS27A, RPS20, RNH1, RPS13, PNPT1, EXOSC2, RPL24, RPL18, RPL5, RPS27, RPL27, PABPC1, MRTO4, RPL12, RPL6, RPL38, RPL9, EIF4A3, RPS15, EIF3E, FEN1, RPS2, UPF1, EIF4G1, SKIV2L2, RPL31, ETF1, PABPC4, RPLP2, RPS4X, RPL35A, RPL7, RPS26, RPS23, RPL35, …
nitrogen compound metabolic process	1.13553e-54	GO:0006807	734	478.353	6731	LDHB, SSB, LDHA, RBMX, PARN, ANXA3, AK2, RSL1D1, FARSA, PDHA1, SRM, XPO1, EIF2A, HARS, RNASEH2B, NDUFC2, DARS2, NAXE, DNAJA3, TRMT6, RPL13, POP1, RPL13A, TYMS, PSMD3, DDX6, PPP2R1A, RPS14, SLIRP, ATP6V1B2, GNAS, EZR, FUBP3, SNRNP200, YWHAB, COASY, HSP90AB1, SEH1L, GLUD1, TRIM28, RPL26, PSMB2, PRMT5, YARS2, IMPDH2, G3BP1, SRSF2, GSPT1, USP9X, HNRNPD, ATP5A1, SRSF7, SRSF5, PSMD14, RPS6KA3, GSTP1, M…
viral transcription	1.68509e-54	GO:0019083	88	12.3657	174	RPL13, RPL13A, RPS14, SEH1L, RPL26, AAAS, SMARCA4, RPL10, SUPT5H, RPS24, NUP153, RPS3A, RPL23A, NUP133, RPL34, RPL17, RPS27A, RPS20, RPS13, RPL24, RPL18, RPL5, RPS27, RPL27, RPL12, RPL6, RPL38, PFN1, RPL9, RPS15, NUP93, RPS2, NUP98, NUP210, RPL31, RPLP2, RPS4X, RPL35A, RPL7, RPS26, RPS23, RPL35, RPL8, CDK9, RPL11, RPSA, RPL32, RPS12, RPS10, RPL4, RAE1, RPL18A, RPS11, RPS15A, RANBP2, RPL3, TARDBP,…
viral life cycle	2.27739e-54	GO:0019058	138	30.9142	435	SSB, XPO1, RPL13, RPL13A, DDX6, RPS14, HSP90AB1, SEH1L, TRIM28, RPL26, TRIM25, EIF3L, AAAS, DDX3X, SMARCA4, RPL10, VTA1, SUPT5H, RPS24, NUP153, RPS3A, EIF3G, RPL23A, NUP133, CTBP2, RPL34, ZC3HAV1, MRE11A, RPL17, RPS27A, RPS20, RPS13, RPL24, DDX5, RPL18, THOC2, RPL5, KPNB1, RPS27, RAB1B, RAB7A, RPL27, PABPC1, SLC1A5, RPL12, RPL6, RPL38, SRPK1, PFN1, RPL9, RPS15, EIF3B, NUP93, RPS2, EIF3A, NUP98, N…
posttranscriptional regulation of gene expression	2.60649e-53	GO:0010608	139	31.9092	449	PARN, XPO1, EIF2A, RPL13A, PSMD3, DDX6, RPS14, YWHAB, PSMB2, HNRNPD, PSMD14, RPS6KA3, RBM4, AARS, PSMD11, EIF4H, CNOT9, CNOT1, EIF3L, DDX3X, PSMB5, PSMA4, EIF3G, NPM1, POLDIP3, KRT17, RPS27A, PSMA7, SYNCRIP, EXOSC2, HNRNPA0, PSMD8, YBX1, EEF2, PABPC1, RPL38, PPP1CA, PA2G4, EIF4A3, PSMC3, HNRNPC, EIF3B, MAPK1, IARS2, EIF3E, UPF1, ELAVL1, EIF4G1, EPRS, EIF3A, CDC37, IGF2BP3, ETF1, PSMB4, RPS4X, EIF…
mRNA catabolic process	9.35639e-53	GO:0006402	95	15.0662	212	PARN, RPL13, RPL13A, DDX6, PPP2R1A, RPS14, RPL26, GSPT1, CNOT9, CNOT1, RPL10, RPS24, RPS3A, RPL23A, RPL34, ZC3HAV1, RPL17, RPS27A, RPS20, RNH1, RPS13, PNPT1, EXOSC2, RPL24, RPL18, RPL5, RPS27, RPL27, PABPC1, MRTO4, RPL12, RPL6, RPL38, RPL9, EIF4A3, RPS15, EIF3E, RPS2, UPF1, EIF4G1, RPL31, ETF1, RPLP2, RPS4X, RPL35A, RPL7, RPS26, RPS23, RPL35, RPL8, EIF4A1, RPL11, RPSA, RPL32, RPS12, RPS10, RPL4, …
nuclear-transcribed mRNA catabolic process	1.17502e-50	GO:0000956	90	14.0713	198	PARN, RPL13, RPL13A, DDX6, PPP2R1A, RPS14, RPL26, GSPT1, CNOT9, CNOT1, RPL10, RPS24, RPS3A, RPL23A, RPL34, RPL17, RPS27A, RPS20, RPS13, EXOSC2, RPL24, RPL18, RPL5, RPS27, RPL27, PABPC1, MRTO4, RPL12, RPL6, RPL38, RPL9, EIF4A3, RPS15, EIF3E, RPS2, UPF1, EIF4G1, RPL31, ETF1, RPLP2, RPS4X, RPL35A, RPL7, RPS26, RPS23, RPL35, RPL8, EIF4A1, RPL11, RPSA, RPL32, RPS12, RPS10, RPL4, RPL18A, RPS11, RPS15A,…
cellular localization	1.03529e-49	GO:0051641	361	170.277	2396	SPTBN1, SSB, SRP54, TIMM44, SPTBN2, IPO5, XPO1, TIMM50, DNAJA3, RPL13, RPL13A, RPS14, EZR, IPO7, YWHAB, HSP90AB1, SEH1L, TRIM28, RPL26, TUBA1C, SEC31A, PTPN11, SRSF2, KIF5B, ATP5A1, SRSF7, IPO9, SRSF5, AP3M1, RBM4, COPB2, AAAS, HUWE1, DDX3X, ATP5F1, SRP68, DPYSL2, RAB10, RPL10, HSPH1, PHB2, DNM2, CCT3, SPAG9, RPS24, MAPRE1, XPO7, NUP153, RPS3A, CLUH, SCRIB, RPL23A, NPM1, NUP133, RPL34, SRSF6, POL…
nucleobase-containing compound catabolic process	5.76152e-48	GO:0034655	118	25.6553	361	PARN, RNASEH2B, RPL13, POP1, RPL13A, DDX6, PPP2R1A, RPS14, SLIRP, RPL26, GSPT1, HNRNPD, CNOT9, CNOT1, HMGB2, RPL10, RPS24, RPS3A, RPL23A, RPL34, CNP, ZC3HAV1, RPL17, RPS27A, RPS20, RNH1, RPS13, PNPT1, EXOSC2, RPL24, RPL18, RPL5, KPNB1, RPS27, RPL27, PABPC1, MRTO4, RPL12, RPL6, RPL38, RPL9, EIF4A3, RPS15, EIF3E, FEN1, RPS2, UPF1, EIF4G1, SKIV2L2, RPL31, ETF1, PABPC4, RPLP2, AIFM1, RPS4X, RPL35A, H…
establishment of localization in cell	1.03135e-47	GO:0051649	311	137.728	1938	SPTBN1, SRP54, TIMM44, SPTBN2, IPO5, XPO1, TIMM50, RPL13, RPL13A, RPS14, EZR, IPO7, YWHAB, HSP90AB1, SEH1L, TRIM28, RPL26, TUBA1C, SEC31A, PTPN11, SRSF2, KIF5B, ATP5A1, SRSF7, IPO9, SRSF5, AP3M1, RBM4, COPB2, AAAS, HUWE1, ATP5F1, SRP68, DPYSL2, RPL10, PHB2, DNM2, SPAG9, RPS24, XPO7, NUP153, RPS3A, SCRIB, RPL23A, NPM1, NUP133, RPL34, SRSF6, POLDIP3, SEC13, COPB1, CLTC, RPL17, VPS26A, RPS27A, RPS20…
establishment of protein localization to organelle	7.63009e-47	GO:0072594	159	45.5541	641	SPTBN1, SRP54, TIMM44, IPO5, TIMM50, RPL13, RPL13A, RPS14, IPO7, YWHAB, HSP90AB1, TRIM28, RPL26, IPO9, AP3M1, HUWE1, SRP68, RAB10, RPL10, HSPH1, PHB2, RPS24, RPS3A, RPL23A, NUP133, RPL34, RPL17, RPS27A, RPS20, TNPO3, RPS13, RPL24, RPL18, YWHAQ, HSP90AA1, AP3B1, U2AF1, PSMD8, RPL5, KPNB1, RPS27, CCT7, RAB7A, KPNA6, RPL27, PDIA3, SRP14, RPL12, RPL6, RPL38, PMPCA, RPL9, RPS15, IPO4, SRP72, MAPK1, NU…
RNA splicing, via transesterification reactions with bulged adenosine as nucleophile	2.94272e-46	GO:0000377	104	20.7516	292	RBMX, SNRNP200, PRMT5, SRSF2, HNRNPD, SRSF7, SRSF5, HNRNPH1, RBM4, CSTF1, PSPC1, LUC7L2, CPSF7, SRSF6, SFPQ, HNRNPK, RBM25, CLNS1A, SYNCRIP, HNRNPA3, DDX5, SF3A3, CPSF2, HNRNPA0, U2AF1, YBX1, SART1, PRPF31, PABPC1, LUC7L3, SRPK1, SF3B1, SNRNP40, EFTUD2, HNRNPM, EIF4A3, HNRNPC, RAVER1, CTNNBL1, U2AF2, ELAVL1, CDC5L, SRSF1, SKIV2L2, SNRPB, PSIP1, SNRPD1, SNRPD3, PTBP1, HNRNPUL1, SNRPA1, RBM15, SF3A…
mRNA splicing, via spliceosome	2.94272e-46	GO:0000398	104	20.7516	292	RBMX, SNRNP200, PRMT5, SRSF2, HNRNPD, SRSF7, SRSF5, HNRNPH1, RBM4, CSTF1, PSPC1, LUC7L2, CPSF7, SRSF6, SFPQ, HNRNPK, RBM25, CLNS1A, SYNCRIP, HNRNPA3, DDX5, SF3A3, CPSF2, HNRNPA0, U2AF1, YBX1, SART1, PRPF31, PABPC1, LUC7L3, SRPK1, SF3B1, SNRNP40, EFTUD2, HNRNPM, EIF4A3, HNRNPC, RAVER1, CTNNBL1, U2AF2, ELAVL1, CDC5L, SRSF1, SKIV2L2, SNRPB, PSIP1, SNRPD1, SNRPD3, PTBP1, HNRNPUL1, SNRPA1, RBM15, SF3A…
cellular nitrogen compound catabolic process	8.16128e-46	GO:0044270	121	28.0715	395	PARN, RNASEH2B, RPL13, POP1, RPL13A, DDX6, PPP2R1A, RPS14, SLIRP, RPL26, GSPT1, HNRNPD, CNOT9, CNOT1, HMGB2, RPL10, RPS24, RPS3A, RPL23A, RPL34, CNP, ZC3HAV1, RPL17, RPS27A, RPS20, RNH1, RPS13, MPST, BLVRA, PNPT1, EXOSC2, RPL24, RPL18, RPL5, KPNB1, RPS27, RPL27, PABPC1, MRTO4, RPL12, RPL6, RPL38, RPL9, EIF4A3, RPS15, EIF3E, FEN1, RPS2, UPF1, EIF4G1, SKIV2L2, RPL31, ETF1, PABPC4, RPLP2, AIFM1, RPS…
RNA splicing, via transesterification reactions	1.28328e-45	GO:0000375	104	21.0359	296	RBMX, SNRNP200, PRMT5, SRSF2, HNRNPD, SRSF7, SRSF5, HNRNPH1, RBM4, CSTF1, PSPC1, LUC7L2, CPSF7, SRSF6, SFPQ, HNRNPK, RBM25, CLNS1A, SYNCRIP, HNRNPA3, DDX5, SF3A3, CPSF2, HNRNPA0, U2AF1, YBX1, SART1, PRPF31, PABPC1, LUC7L3, SRPK1, SF3B1, SNRNP40, EFTUD2, HNRNPM, EIF4A3, HNRNPC, RAVER1, CTNNBL1, U2AF2, ELAVL1, CDC5L, SRSF1, SKIV2L2, SNRPB, PSIP1, SNRPD1, SNRPD3, PTBP1, HNRNPUL1, SNRPA1, RBM15, SF3A…
cellular component organization or biogenesis	3.01404e-45	GO:0071840	659	429.53	6044	SPTBN1, RBMX, SRP54, TIMM44, RSL1D1, SPTBN2, IPO5, XPO1, PDLIM5, DECR1, EIF2A, HARS, TIMM50, NDUFC2, YME1L1, NDRG3, DARS2, NAXE, MYO1B, DNAJA3, RPL13, RPL13A, DDX6, PPP2R1A, CAPN1, RPS14, HSD17B12, SLIRP, ATP6V1B2, EZR, SNRNP200, YWHAB, HSP90AB1, SEH1L, TRIM28, RPL26, PRMT5, YARS2, CAPZB, IMPDH2, SEC31A, PTPN11, CFAP20, G3BP1, CNN3, PLEC, KIF5B, GSPT1, USP9X, CAPNS1, SRSF5, CKAP5, RPS6KA3, NCLN, …
cellular macromolecule catabolic process	3.4324e-45	GO:0044265	193	65.4529	921	PARN, RNASEH2B, YME1L1, RPL13, POP1, RPL13A, PSMD3, DDX6, PPP2R1A, RPS14, SLIRP, EZR, HSP90AB1, RPL26, PSMB2, GSPT1, USP9X, HNRNPD, PSMD14, PSMD11, CNOT9, TRIM25, CNOT1, HUWE1, HMGB2, PSMB5, RPL10, PSMA4, BUB3, RPS24, CCDC47, RPS3A, RPL23A, RPL34, ZC3HAV1, RPL17, RPS27A, RPS20, RNH1, PSMA7, SKP1, RPS13, CUL2, PNPT1, EXOSC2, RPL24, RPL18, HECTD1, PSMD8, RPL5, KPNB1, RPS27, USP10, MAD2L1, RAB7A, UB…
aromatic compound catabolic process	4.79164e-45	GO:0019439	121	28.498	401	PARN, RNASEH2B, RPL13, POP1, RPL13A, DDX6, PPP2R1A, RPS14, SLIRP, RPL26, GSPT1, HNRNPD, CNOT9, CNOT1, HMGB2, RPL10, RPS24, RPS3A, RPL23A, RPL34, CNP, FAH, ZC3HAV1, RPL17, RPS27A, RPS20, RNH1, RPS13, BLVRA, PNPT1, EXOSC2, RPL24, RPL18, RPL5, KPNB1, RPS27, RPL27, PABPC1, MRTO4, RPL12, RPL6, RPL38, RPL9, EIF4A3, RPS15, EIF3E, FEN1, RPS2, UPF1, EIF4G1, SKIV2L2, RPL31, ETF1, PABPC4, RPLP2, AIFM1, RPS4…
protein localization to organelle	4.86831e-45	GO:0033365	185	61.0467	859	SPTBN1, SSB, SRP54, TIMM44, IPO5, XPO1, TIMM50, RPL13, RPL13A, RPS14, EZR, IPO7, YWHAB, HSP90AB1, TRIM28, RPL26, IPO9, AP3M1, HUWE1, DDX3X, SRP68, RAB10, RPL10, HSPH1, PHB2, CCT3, RPS24, MAPRE1, RPS3A, RPL23A, NUP133, RPL34, RPL17, RPS27A, RPS20, TNPO3, RPS13, RPL24, RPL18, YWHAQ, HSP90AA1, AP3B1, U2AF1, PSMD8, YBX1, RPL5, KPNB1, RPS27, CCT7, RAB7A, ARL1, KPNA6, RPL27, PDIA3, SRP14, RPL12, RPL6, …
heterocycle catabolic process	5.47746e-45	GO:0046700	119	27.6451	389	PARN, RNASEH2B, RPL13, POP1, RPL13A, DDX6, PPP2R1A, RPS14, SLIRP, RPL26, GSPT1, HNRNPD, CNOT9, CNOT1, HMGB2, RPL10, RPS24, RPS3A, RPL23A, RPL34, CNP, ZC3HAV1, RPL17, RPS27A, RPS20, RNH1, RPS13, BLVRA, PNPT1, EXOSC2, RPL24, RPL18, RPL5, KPNB1, RPS27, RPL27, PABPC1, MRTO4, RPL12, RPL6, RPL38, RPL9, EIF4A3, RPS15, EIF3E, FEN1, RPS2, UPF1, EIF4G1, SKIV2L2, RPL31, ETF1, PABPC4, RPLP2, AIFM1, RPS4X, RP…
intracellular protein transport	6.59092e-45	GO:0006886	200	69.788	982	SPTBN1, SRP54, TIMM44, IPO5, XPO1, TIMM50, RPL13, RPL13A, RPS14, IPO7, YWHAB, HSP90AB1, TRIM28, RPL26, PTPN11, IPO9, AP3M1, COPB2, HUWE1, SRP68, RPL10, PHB2, RPS24, XPO7, RPS3A, RPL23A, NPM1, NUP133, RPL34, SEC13, COPB1, CLTC, RPL17, VPS26A, RPS27A, RPS20, TNPO3, COPG2, SSR1, RPS13, BSG, TBC1D15, SEC24A, RPL24, RPL18, PDCD6, YWHAQ, HSP90AA1, AP3B1, U2AF1, PSMD8, RPL5, KPNB1, RPS27, SEC24C, RAB7A,…
RNA splicing	4.61326e-44	GO:0008380	118	27.7162	390	RBMX, PPP2R1A, SNRNP200, PRMT5, SRSF2, HNRNPD, SRSF7, SRSF5, HNRNPH1, RBM4, CSTF1, PSPC1, LUC7L2, CPSF7, SRSF6, SFPQ, HNRNPK, RBM25, CLNS1A, SYNCRIP, RPS13, HNRNPA3, AHNAK, DDX5, SF3A3, RTCB, CPSF2, HNRNPA0, U2AF1, THOC2, YBX1, SART1, C14orf166, PRPF31, PABPC1, LUC7L3, SRPK1, SF3B1, SNRNP40, EFTUD2, HNRNPM, EIF4A3, HNRNPC, RAVER1, CTNNBL1, U2AF2, ELAVL1, CDC5L, SRSF1, SKIV2L2, SNRPB, PSIP1, SNRPD…
ncRNA metabolic process	9.51762e-44	GO:0034660	142	39.2291	552	SSB, RSL1D1, FARSA, HARS, DARS2, TRMT6, RPL13, POP1, RPL13A, RPS14, RPL26, YARS2, AARS, LRRC47, SMARCA4, RPL10, RPS24, RPS3A, RPL23A, RPL34, BYSL, RPL17, RPS27A, RPS20, RPS13, PNPT1, EXOSC2, RPL24, RTCB, RPL18, RPL5, RPS27, SART1, PPA2, C14orf166, RPL27, MRTO4, RPL12, RPL6, RPL38, PA2G4, RPL9, EIF4A3, RPS15, TARS, AIMP2, IARS2, QARS, RPS2, CARS, NOP56, SKIV2L2, EPRS, RPL31, RPLP2, RPS4X, RPL35A, …
cellular macromolecule localization	1.49702e-43	GO:0070727	259	108.235	1523	SPTBN1, SSB, SRP54, TIMM44, IPO5, XPO1, TIMM50, DNAJA3, RPL13, RPL13A, RPS14, EZR, IPO7, YWHAB, HSP90AB1, SEH1L, TRIM28, RPL26, PTPN11, KIF5B, IPO9, AP3M1, COPB2, HUWE1, DDX3X, SRP68, RAB10, RPL10, HSPH1, PHB2, CCT3, RPS24, MAPRE1, XPO7, RPS3A, RPL23A, NPM1, NUP133, RPL34, SEC13, HNRNPK, COPB1, CLTC, RPL17, VPS26A, RPS27A, RPS20, TNPO3, COPG2, SSR1, RPS13, BSG, TBC1D15, SEC24A, EXOSC2, RPL24, RPL…
cellular protein localization	1.75853e-43	GO:0034613	258	107.667	1515	SPTBN1, SSB, SRP54, TIMM44, IPO5, XPO1, TIMM50, DNAJA3, RPL13, RPL13A, RPS14, EZR, IPO7, YWHAB, HSP90AB1, SEH1L, TRIM28, RPL26, PTPN11, KIF5B, IPO9, AP3M1, COPB2, HUWE1, DDX3X, SRP68, RAB10, RPL10, HSPH1, PHB2, CCT3, RPS24, MAPRE1, XPO7, RPS3A, RPL23A, NPM1, NUP133, RPL34, SEC13, HNRNPK, COPB1, CLTC, RPL17, VPS26A, RPS27A, RPS20, TNPO3, COPG2, SSR1, RPS13, BSG, TBC1D15, SEC24A, RPL24, RPL18, PDCD…
cellular component biogenesis	1.92341e-43	GO:0044085	380	195.079	2745	SPTBN1, RBMX, SRP54, RSL1D1, SPTBN2, IPO5, XPO1, PDLIM5, DECR1, EIF2A, NDUFC2, NAXE, MYO1B, RPL13, RPL13A, DDX6, PPP2R1A, RPS14, EZR, SNRNP200, YWHAB, TRIM28, RPL26, PRMT5, CAPZB, IMPDH2, SEC31A, PTPN11, PLEC, SRSF5, NCLN, PSMD11, EIF4H, ANXA6, CNOT1, EIF3L, DDX3X, HMGB2, SMARCA4, CAB39, MTDH, RPL10, VTA1, LUC7L2, GFPT1, DNM2, CCT3, SPAG9, RPS24, MAPRE1, CPSF7, NUP153, RPS3A, EIF3G, RPL23A, NPM1,…
cellular component organization	8.26991e-43	GO:0016043	641	418.87	5894	SPTBN1, RBMX, SRP54, TIMM44, SPTBN2, IPO5, XPO1, PDLIM5, DECR1, EIF2A, HARS, TIMM50, NDUFC2, YME1L1, NDRG3, DARS2, NAXE, MYO1B, DNAJA3, RPL13, RPL13A, DDX6, PPP2R1A, CAPN1, RPS14, HSD17B12, SLIRP, ATP6V1B2, EZR, SNRNP200, YWHAB, HSP90AB1, SEH1L, TRIM28, RPL26, PRMT5, YARS2, CAPZB, IMPDH2, SEC31A, PTPN11, CFAP20, G3BP1, CNN3, PLEC, KIF5B, GSPT1, USP9X, CAPNS1, SRSF5, CKAP5, RPS6KA3, NCLN, MSH6, PS…
single-organism intracellular transport	1.33243e-42	GO:1902582	157	47.8282	673	SPTBN1, SRP54, TIMM44, IPO5, TIMM50, RPL13, RPL13A, RPS14, IPO7, HSP90AB1, SEH1L, TRIM28, RPL26, KIF5B, ATP5A1, IPO9, AP3M1, AAAS, ATP5F1, SRP68, RPL10, PHB2, RPS24, NUP153, RPS3A, RPL23A, NUP133, RPL34, RPL17, RPS27A, RPS20, TNPO3, SSR1, RPS13, BSG, RPL24, ATP5L, RPL18, HSP90AA1, AP3B1, RPL5, KPNB1, RPS27, ATP5O, ACACA, ACTN4, KPNA6, RPL27, PDIA3, SRP14, RPL12, RPL6, UCHL1, RPL38, RPL9, ANXA2, R…
cellular catabolic process	2.22352e-42	GO:0044248	256	107.809	1517	PARN, DECR1, RNASEH2B, YME1L1, HADHA, RPL13, POP1, RPL13A, PSMD3, DDX6, PPP2R1A, CAPN1, RPS14, SLIRP, EZR, HSP90AB1, GLUD1, RPL26, PSMB2, GSPT1, USP9X, HNRNPD, PSMD14, PSMD11, CNOT9, TRIM25, CNOT1, HUWE1, HMGB2, PSMB5, RPL10, PSMA4, BUB3, RPS24, CCDC47, RPS3A, RPL23A, TPI1, RPL34, ACOT7, CNP, FAH, SORD, ZC3HAV1, RPL17, RPS27A, RPS20, RNH1, PSMA7, SKP1, RPS13, MPST, BLVRA, PYGB, CUL2, PNPT1, EXOSC…
ribosome biogenesis	3.43459e-42	GO:0042254	103	22.244	313	RSL1D1, XPO1, EIF2A, RPL13, RPL13A, RPS14, RPL26, DDX3X, RPL10, RPS24, RPS3A, RPL23A, NPM1, RPL34, BYSL, RPL17, RPS27A, RPS20, RPS13, EXOSC2, RPL24, RPL18, RPL5, RPS27, SART1, RPL27, MRTO4, RPL12, RPL6, GNL3, RPL38, PA2G4, BRIX1, RPL9, EIF4A3, RPS15, RPS2, NOP56, SKIV2L2, RPL31, RPLP2, RPS4X, RPL35A, RPL7, RPS26, RPS23, RPL35, RPL8, GNL1, RRP1B, DHX30, RPL11, EIF6, DDX21, MRPS9, RPSA, PES1, RPL32…
organic cyclic compound catabolic process	1.00075e-41	GO:1901361	120	29.9904	422	PARN, RNASEH2B, RPL13, POP1, RPL13A, DDX6, PPP2R1A, RPS14, SLIRP, RPL26, GSPT1, HNRNPD, CNOT9, CNOT1, HMGB2, RPL10, RPS24, RPS3A, RPL23A, RPL34, CNP, FAH, ZC3HAV1, RPL17, RPS27A, RPS20, RNH1, RPS13, BLVRA, PNPT1, EXOSC2, RPL24, RPL18, RPL5, KPNB1, RPS27, RPL27, PABPC1, MRTO4, RPL12, RPL6, RPL38, RPL9, EIF4A3, RPS15, EIF3E, FEN1, RPS2, UPF1, EIF4G1, SKIV2L2, RPL31, ETF1, PABPC4, RPLP2, AIFM1, RPS4…
rRNA processing	1.12891e-41	GO:0006364	92	18.0511	254	RSL1D1, RPL13, RPL13A, RPS14, RPL26, RPL10, RPS24, RPS3A, RPL23A, RPL34, BYSL, RPL17, RPS27A, RPS20, RPS13, EXOSC2, RPL24, RPL18, RPL5, RPS27, SART1, RPL27, MRTO4, RPL12, RPL6, RPL38, PA2G4, RPL9, EIF4A3, RPS15, RPS2, NOP56, SKIV2L2, RPL31, RPLP2, RPS4X, RPL35A, RPL7, RPS26, RPS23, RPL35, RPL8, RRP1B, RPL11, EIF6, DDX21, MRPS9, RPSA, PES1, RPL32, WDR18, RPS12, RPS10, RPL4, RPL18A, RPS11, RPS15A, …
protein targeting to membrane	1.81996e-41	GO:0006612	78	13.0053	183	SPTBN1, SRP54, RPL13, RPL13A, RPS14, RPL26, SRP68, RPL10, RPS24, RPS3A, RPL23A, RPL34, RPL17, RPS27A, RPS20, SSR1, RPS13, BSG, RPL24, RPL18, RPL5, RPS27, RPL27, SRP14, RPL12, RPL6, RPL38, RPL9, ANXA2, RPS15, SRP72, RPS2, RPL31, RPLP2, RPS4X, RPL35A, RPL7, RPS26, SRPRB, RPS23, RPL35, RPL8, RPL11, RPSA, RPL32, RPS12, RPS10, RPL4, RPL18A, RPS11, RPS15A, RPL3, NUP155, RPS7, RPL15, RPS9, RPS19, RPL36,…
cellular metabolic process	4.59738e-41	GO:0044237	915	704.987	9920	LDHB, SPTBN1, SSB, LDHA, RBMX, PARN, ANXA3, AK2, RSL1D1, FARSA, PDHA1, SPTBN2, SRM, XPO1, DECR1, EIF2A, HARS, RNASEH2B, TIMM50, NDUFC2, YME1L1, HADHA, DARS2, NAXE, DNAJA3, TRMT6, RPL13, UBE2M, POP1, RPL13A, TYMS, PSMD3, DDX6, PPP2R1A, CAPN1, RPS14, HSD17B12, SLIRP, ATP6V1B2, GNAS, AGPS, EZR, FUBP3, SNRNP200, TXNL1, YWHAB, COASY, HSP90AB1, SEH1L, GLUD1, TRIM28, RPL26, IDH2, PSMB2, PRMT5, YARS2, IM…
rRNA metabolic process	1.06525e-40	GO:0016072	92	18.4775	260	RSL1D1, RPL13, RPL13A, RPS14, RPL26, RPL10, RPS24, RPS3A, RPL23A, RPL34, BYSL, RPL17, RPS27A, RPS20, RPS13, EXOSC2, RPL24, RPL18, RPL5, RPS27, SART1, RPL27, MRTO4, RPL12, RPL6, RPL38, PA2G4, RPL9, EIF4A3, RPS15, RPS2, NOP56, SKIV2L2, RPL31, RPLP2, RPS4X, RPL35A, RPL7, RPS26, RPS23, RPL35, RPL8, RRP1B, RPL11, EIF6, DDX21, MRPS9, RPSA, PES1, RPL32, WDR18, RPS12, RPS10, RPL4, RPL18A, RPS11, RPS15A, …
macromolecule catabolic process	1.37196e-40	GO:0009057	212	81.7273	1150	PARN, XPO1, RNASEH2B, YME1L1, RPL13, POP1, RPL13A, PSMD3, DDX6, PPP2R1A, CAPN1, RPS14, SLIRP, EZR, HSP90AB1, RPL26, PSMB2, GSPT1, USP9X, HNRNPD, PSMD14, PSMD11, CNOT9, TRIM25, CNOT1, HUWE1, HMGB2, PSMB5, RPL10, PSMA4, BUB3, RPS24, CCDC47, RPS3A, RPL23A, CTSD, RPL34, ZC3HAV1, RPL17, RPS27A, RPS20, RNH1, PSMA7, SKP1, RPS13, PYGB, CUL2, PNPT1, EXOSC2, RPL24, RPL18, HECTD1, PSMD8, RPL5, KPNB1, RPS27,…
ribonucleoprotein complex assembly	2.00625e-40	GO:0022618	80	14.0713	198	EIF2A, RPL13A, DDX6, RPS14, SNRNP200, PRMT5, SRSF5, EIF4H, CNOT1, EIF3L, DDX3X, RPL10, LUC7L2, EIF3G, RPL23A, NPM1, SRSF6, CLNS1A, RPL24, ATXN2L, SF3A3, RPL5, RPS27, SART1, PRPF31, LUC7L3, MRTO4, RPL12, RPL6, RPL38, SF3B1, BRIX1, RPS15, EIF3B, EIF3E, SRSF1, EIF3A, SNRPB, PSIP1, SNRPD1, SNRPD3, EIF2S3, DHX30, RPL11, EIF6, SF3A2, RPSA, PRPF6, SNRPE, RPS10, DYNC1H1, EIF3D, EIF3H, RPL3, EIF3M, RPS27L…
macromolecular complex assembly	3.09332e-40	GO:0065003	261	114.134	1606	SPTBN1, RBMX, SRP54, SPTBN2, IPO5, DECR1, EIF2A, NDUFC2, NAXE, RPL13A, DDX6, PPP2R1A, RPS14, SNRNP200, YWHAB, TRIM28, PRMT5, CAPZB, IMPDH2, SEC31A, PTPN11, SRSF5, NCLN, PSMD11, EIF4H, ANXA6, CNOT1, EIF3L, DDX3X, HMGB2, SMARCA4, CAB39, RPL10, LUC7L2, GFPT1, CCT3, SPAG9, MAPRE1, CPSF7, NUP153, EIF3G, RPL23A, NPM1, HIST1H4A, NAP1L4, FH, SMARCA5, RBBP7, SRSF6, NDUFA9, SEC13, PFKL, RPS27A, SEPT9, CLNS…
organic substance catabolic process	4.78407e-40	GO:1901575	280	127.495	1794	LDHA, PARN, XPO1, DECR1, RNASEH2B, YME1L1, HADHA, RPL13, POP1, RPL13A, PSMD3, DDX6, PPP2R1A, CAPN1, RPS14, SLIRP, EZR, HSP90AB1, GLUD1, RPL26, PSMB2, GSPT1, USP9X, HNRNPD, PSMD14, PSMD11, CNOT9, TRIM25, CNOT1, HUWE1, HMGB2, PSMB5, RPL10, ENO1, PSMA4, BUB3, RPS24, CCDC47, RPS3A, RPL23A, CTSD, TPI1, RPL34, ACOT7, CNP, FAH, SORD, ZC3HAV1, PFKL, PFKP, RPL17, RPS27A, RPS20, RNH1, PSMA7, SKP1, RPS13, M…
ribonucleoprotein complex subunit organization	1.69568e-39	GO:0071826	81	14.782	208	EIF2A, RPL13A, DDX6, RPS14, SNRNP200, PRMT5, KIF5B, SRSF5, EIF4H, CNOT1, EIF3L, DDX3X, RPL10, LUC7L2, EIF3G, RPL23A, NPM1, SRSF6, CLNS1A, RPL24, ATXN2L, SF3A3, RPL5, RPS27, SART1, PRPF31, LUC7L3, MRTO4, RPL12, RPL6, RPL38, SF3B1, BRIX1, RPS15, EIF3B, EIF3E, SRSF1, EIF3A, SNRPB, PSIP1, SNRPD1, SNRPD3, EIF2S3, DHX30, RPL11, EIF6, SF3A2, RPSA, PRPF6, SNRPE, RPS10, DYNC1H1, EIF3D, EIF3H, RPL3, EIF3M,…
mRNA processing	1.02414e-38	GO:0006397	121	32.4066	456	RBMX, SNRNP200, PRMT5, SRSF2, HNRNPD, SRSF7, SRSF5, HNRNPH1, RBM4, CSTF1, PSPC1, SAFB, LUC7L2, SUPT5H, CPSF7, SRSF6, POLDIP3, SFPQ, HNRNPK, RBM25, CLNS1A, SYNCRIP, PNPT1, HNRNPA3, DDX5, SF3A3, CPSF2, HNRNPA0, U2AF1, THOC2, YBX1, SART1, PRPF31, PABPC1, LUC7L3, SRPK1, SF3B1, SNRNP40, EFTUD2, HNRNPM, EIF4A3, HNRNPC, RAVER1, CTNNBL1, U2AF2, ELAVL1, CDC5L, SRSF1, SKIV2L2, SNRPB, PSIP1, SNRPD1, SNRPD3,…
ncRNA processing	1.47952e-37	GO:0034470	110	27.9294	393	SSB, RSL1D1, TRMT6, RPL13, POP1, RPL13A, RPS14, RPL26, AARS, RPL10, RPS24, RPS3A, RPL23A, RPL34, BYSL, RPL17, RPS27A, RPS20, RPS13, EXOSC2, RPL24, RTCB, RPL18, RPL5, RPS27, SART1, C14orf166, RPL27, MRTO4, RPL12, RPL6, RPL38, PA2G4, RPL9, EIF4A3, RPS15, RPS2, NOP56, SKIV2L2, RPL31, RPLP2, RPS4X, RPL35A, HSD17B10, RPL7, RPS26, RPS23, RPL35, RPL8, RRP1B, RPL11, EIF6, DDX21, MRPS9, RPSA, SRRT, PES1, …
catabolic process	2.45936e-37	GO:0009056	284	134.601	1894	LDHA, PARN, XPO1, DECR1, RNASEH2B, YME1L1, HADHA, RPL13, POP1, RPL13A, PSMD3, DDX6, PPP2R1A, CAPN1, RPS14, SLIRP, EZR, HSP90AB1, GLUD1, RPL26, PSMB2, GSPT1, USP9X, HNRNPD, PSMD14, PSMD11, CNOT9, TRIM25, CNOT1, HUWE1, HMGB2, PSMB5, RPL10, ENO1, PSMA4, BUB3, RPS24, CCDC47, RPS3A, RPL23A, CTSD, TPI1, RPL34, ACOT7, CNP, FAH, SORD, ZC3HAV1, PFKL, PFKP, RPL17, RPS27A, RPS20, RNH1, PSMA7, SKP1, RPS13, M…
macromolecule localization	6.72945e-37	GO:0033036	361	192.876	2714	SPTBN1, SSB, SRP54, TIMM44, RSL1D1, ARF5, GAPVD1, IPO5, XPO1, TIMM50, DNAJA3, RPL13, RPL13A, RPS14, ATP6V1B2, EZR, IPO7, YWHAB, HSP90AB1, SEH1L, GLUD1, TRIM28, RPL26, SEC31A, PTPN11, SRSF2, KIF5B, SRSF7, IPO9, SRSF5, AP3M1, ARF3, CKAP5, COPB2, AAAS, HUWE1, DDX3X, SRP68, RAB10, RPL10, VTA1, HSPH1, PHB2, DNM2, CCT3, RPS24, MAPRE1, XPO7, NUP153, RPS3A, SCRIB, RPL23A, NPM1, NUP133, RPL34, SRSF6, ATP6…
protein targeting	7.5282e-37	GO:0006605	148	47.8993	674	SPTBN1, SRP54, TIMM44, IPO5, TIMM50, RPL13, RPL13A, RPS14, IPO7, YWHAB, HSP90AB1, TRIM28, RPL26, IPO9, AP3M1, HUWE1, SRP68, RPL10, PHB2, RPS24, RPS3A, RPL23A, NUP133, RPL34, RPL17, RPS27A, RPS20, TNPO3, SSR1, RPS13, BSG, RPL24, RPL18, YWHAQ, HSP90AA1, AP3B1, U2AF1, PSMD8, RPL5, KPNB1, RPS27, RAB7A, KPNA6, RPL27, PDIA3, SRP14, RPL12, RPL6, RPL38, PMPCA, RPL9, ANXA2, RPS15, IPO4, SRP72, MAPK1, NUP9…
nucleobase-containing compound metabolic process	1.96478e-36	GO:0006139	601	398.687	5610	LDHB, SSB, LDHA, RBMX, PARN, ANXA3, AK2, RSL1D1, FARSA, PDHA1, XPO1, EIF2A, HARS, RNASEH2B, NDUFC2, DARS2, DNAJA3, TRMT6, RPL13, POP1, RPL13A, TYMS, DDX6, PPP2R1A, RPS14, SLIRP, ATP6V1B2, GNAS, EZR, FUBP3, SNRNP200, YWHAB, COASY, SEH1L, TRIM28, RPL26, PRMT5, YARS2, IMPDH2, G3BP1, SRSF2, GSPT1, USP9X, HNRNPD, ATP5A1, SRSF7, SRSF5, PSMD14, RPS6KA3, MSH6, HNRNPH1, RBM4, AARS, UGP2, CNOT9, DDX50, TRI…
primary metabolic process	3.75377e-36	GO:0044238	902	704.987	9920	LDHB, SPTBN1, SSB, LDHA, RBMX, PARN, ANXA3, AK2, RSL1D1, FARSA, PDHA1, SPTBN2, XPO1, DECR1, EIF2A, HARS, RNASEH2B, TIMM50, NDUFC2, YME1L1, HADHA, DARS2, DNAJA3, TRMT6, RPL13, UBE2M, POP1, RPL13A, TYMS, PSMD3, DDX6, PPP2R1A, CAPN1, RPS14, HSD17B12, SLIRP, ATP6V1B2, GNAS, AGPS, EZR, FUBP3, SNRNP200, YWHAB, COASY, HSP90AB1, SEH1L, GLUD1, TRIM28, RPL26, IDH2, PSMB2, PRMT5, YARS2, IMPDH2, PTPN11, CFAP…
single-organism cellular localization	6.99284e-36	GO:1902580	193	75.4734	1062	SPTBN1, SRP54, TIMM44, IPO5, TIMM50, DNAJA3, RPL13, RPL13A, RPS14, EZR, IPO7, YWHAB, HSP90AB1, SEH1L, TRIM28, RPL26, KIF5B, ATP5A1, IPO9, AP3M1, AAAS, ATP5F1, SRP68, DPYSL2, RAB10, RPL10, PHB2, DNM2, RPS24, NUP153, RPS3A, SCRIB, RPL23A, NUP133, RPL34, CLTC, RPL17, RPS27A, RPS20, TNPO3, SSR1, RPS13, BSG, RPL24, ATP5L, ACTR3, RPL18, YWHAQ, HSP90AA1, ACSL3, AP3B1, RPL5, KPNB1, RPS27, ATP5O, ACACA, A…
macromolecular complex subunit organization	1.40245e-35	GO:0043933	322	165.587	2330	SPTBN1, RBMX, SRP54, SPTBN2, IPO5, DECR1, EIF2A, NDUFC2, NAXE, RPL13A, DDX6, PPP2R1A, RPS14, SNRNP200, YWHAB, TRIM28, PRMT5, CAPZB, IMPDH2, SEC31A, PTPN11, KIF5B, GSPT1, SRSF5, NCLN, PSMD11, EIF4H, ANXA6, CNOT1, EIF3L, HUWE1, DDX3X, HMGB2, NAA50, SMARCA4, CAB39, RPL10, VTA1, SAFB, LUC7L2, GFPT1, CCT3, SPAG9, SUPT5H, MAPRE1, CPSF7, NUP153, SUPT16H, EIF3G, RPL23A, NPM1, HIST1H4A, NUP133, NAP1L4, FH…
cellular macromolecular complex assembly	1.53065e-35	GO:0034622	177	66.0214	929	SPTBN1, SRP54, SPTBN2, IPO5, EIF2A, NDUFC2, RPL13A, DDX6, RPS14, SNRNP200, PRMT5, CAPZB, SRSF5, PSMD11, EIF4H, CNOT1, EIF3L, DDX3X, HMGB2, RPL10, LUC7L2, MAPRE1, NUP153, EIF3G, RPL23A, NPM1, HIST1H4A, NAP1L4, SMARCA5, RBBP7, SRSF6, NDUFA9, RPS27A, CLNS1A, RPL24, ATXN2L, SF3A3, ACTR3, HSP90AA1, PSMD8, RPL5, KPNB1, RPS27, SART1, PRPF31, RAC1, TMED10, LUC7L3, ACTR2, MRTO4, RPL12, RPL6, RPL38, CAND1,…
heterocycle metabolic process	1.61147e-35	GO:0046483	608	407.713	5737	LDHB, SSB, LDHA, RBMX, PARN, ANXA3, AK2, RSL1D1, FARSA, PDHA1, XPO1, EIF2A, HARS, RNASEH2B, NDUFC2, DARS2, NAXE, DNAJA3, TRMT6, RPL13, POP1, RPL13A, TYMS, DDX6, PPP2R1A, RPS14, SLIRP, ATP6V1B2, GNAS, EZR, FUBP3, SNRNP200, YWHAB, COASY, SEH1L, TRIM28, RPL26, PRMT5, YARS2, IMPDH2, G3BP1, SRSF2, GSPT1, USP9X, HNRNPD, ATP5A1, SRSF7, SRSF5, PSMD14, RPS6KA3, MSH6, HNRNPH1, RBM4, AARS, UGP2, CNOT9, DDX5…
RNA localization	2.6046e-35	GO:0006403	75	14.2134	200	XPO1, SEH1L, SRSF2, SRSF7, SRSF5, CKAP5, AAAS, CCT3, XPO7, NUP153, NUP133, SRSF6, POLDIP3, SEC13, PNPT1, HNRNPA3, EXOSC2, CPSF2, U2AF1, THOC2, C14orf166, CCT7, PRPF31, DDX19B, EIF4A3, NUP93, U2AF2, UPF1, SRSF1, NUP98, NUP210, CCT6A, IGF2BP3, RUVBL1, EIF5A, G3BP2, CCT5, RPSA, PRPF6, TCP1, RAE1, RANBP2, SRSF3, KHDRBS1, NOL6, NUP155, NUP205, SRSF11, NUP107, DDX39B, RUVBL2, CCT4, LRPPRC, RAN, DKC1, I…
organic cyclic compound metabolic process	2.67369e-35	GO:1901360	624	423.276	5956	LDHB, SSB, LDHA, RBMX, PARN, ANXA3, AK2, RSL1D1, FARSA, PDHA1, XPO1, EIF2A, HARS, RNASEH2B, NDUFC2, DARS2, NAXE, DNAJA3, TRMT6, RPL13, POP1, RPL13A, TYMS, DDX6, PPP2R1A, RPS14, SLIRP, ATP6V1B2, GNAS, EZR, FUBP3, SNRNP200, YWHAB, COASY, SEH1L, TRIM28, RPL26, PRMT5, YARS2, IMPDH2, G3BP1, SRSF2, GSPT1, USP9X, HNRNPD, ATP5A1, SRSF7, SRSF5, PSMD14, RPS6KA3, MSH6, HNRNPH1, RBM4, AARS, UGP2, CNOT9, DDX5…
cellular aromatic compound metabolic process	2.6748e-35	GO:0006725	611	411.124	5785	LDHB, SSB, LDHA, RBMX, PARN, ANXA3, AK2, RSL1D1, FARSA, PDHA1, XPO1, EIF2A, HARS, RNASEH2B, NDUFC2, DARS2, DNAJA3, TRMT6, RPL13, POP1, RPL13A, TYMS, DDX6, PPP2R1A, RPS14, SLIRP, ATP6V1B2, GNAS, EZR, FUBP3, SNRNP200, YWHAB, COASY, SEH1L, TRIM28, RPL26, PRMT5, YARS2, IMPDH2, G3BP1, SRSF2, GSPT1, USP9X, HNRNPD, ATP5A1, SRSF7, SRSF5, PSMD14, RPS6KA3, MSH6, HNRNPH1, RBM4, AARS, UGP2, CNOT9, DDX50, TRI…
organic substance metabolic process	4.07186e-35	GO:0071704	928	737.678	10380	LDHB, SPTBN1, SSB, LDHA, RBMX, PARN, ANXA3, AK2, RSL1D1, FARSA, PDHA1, SPTBN2, SRM, XPO1, DECR1, EIF2A, HARS, RNASEH2B, TIMM50, NDUFC2, YME1L1, HADHA, DARS2, NAXE, DNAJA3, TRMT6, RPL13, UBE2M, POP1, RPL13A, TYMS, PSMD3, DDX6, PPP2R1A, CAPN1, RPS14, HSD17B12, SLIRP, ATP6V1B2, GNAS, AGPS, EZR, FUBP3, SNRNP200, TXNL1, YWHAB, COASY, HSP90AB1, SEH1L, GLUD1, TRIM28, RPL26, IDH2, PSMB2, PRMT5, YARS2, IM…
establishment of protein localization to membrane	1.49018e-34	GO:0090150	100	25.1578	354	SPTBN1, SRP54, RPL13, RPL13A, RPS14, EZR, YWHAB, RPL26, KIF5B, SRP68, RAB10, RPL10, RPS24, RPS3A, RPL23A, RPL34, RPL17, RPS27A, RPS20, SSR1, RPS13, BSG, RPL24, RPL18, YWHAQ, HSP90AA1, ACSL3, RPL5, RPS27, RPL27, SRP14, RPL12, RPL6, NSF, RPL38, RER1, RPL9, ANXA2, RPS15, SRP72, RPS2, NDUFA13, RPL31, YWHAE, RPLP2, RPS4X, RPL35A, RPL7, RPS26, SRPRB, RPS23, RPL35, RPL8, RPL11, NMT1, YWHAG, RPSA, RPL32,…
cellular amino acid metabolic process	1.55169e-34	GO:0006520	90	20.6806	291	FARSA, HARS, DARS2, PSMD3, GLUD1, PSMB2, YARS2, PSMD14, AARS, PSMD11, PSMB5, LRRC47, GFPT1, PSMA4, GSS, DHFR, FAH, GMPS, PSMA7, MPST, GART, SHMT1, ASS1, ADSS, PSMD8, PPA2, CTPS1, PSMC3, TARS, AIMP2, IARS2, QARS, PEPD, GLS, CARS, EPRS, OAT, PSMB4, ASNS, SHMT2, DLD, CAD, WARS, PSMD7, AASDHPPT, PSMD10, PPAT, PPA1, PSMF1, PHGDH, NARS, MTHFD1, PSMD13, PSMC5, PSMD1, LARS, PSMD2, RARS, SLC7A5, AIMP1, DT…
establishment of protein localization	1.93473e-33	GO:0045184	281	139.079	1957	SPTBN1, SRP54, TIMM44, ARF5, GAPVD1, IPO5, XPO1, TIMM50, RPL13, RPL13A, RPS14, ATP6V1B2, EZR, IPO7, YWHAB, HSP90AB1, SEH1L, GLUD1, TRIM28, RPL26, SEC31A, PTPN11, KIF5B, IPO9, AP3M1, ARF3, COPB2, AAAS, HUWE1, SRP68, RAB10, RPL10, VTA1, HSPH1, PHB2, DNM2, RPS24, XPO7, NUP153, RPS3A, RPL23A, NPM1, NUP133, RPL34, ATP6V1A, SEC13, COPB1, PFKL, CLTC, RPL17, VPS26A, RPS27A, RPS20, TNPO3, COPG2, SSR1, RPS…
metabolic process	2.15204e-33	GO:0008152	947	765.039	10765	LDHB, SPTBN1, SSB, LDHA, RBMX, PARN, ANXA3, AK2, RSL1D1, FARSA, PDHA1, SPTBN2, SRM, XPO1, DECR1, EIF2A, HARS, RNASEH2B, TIMM50, NDUFC2, YME1L1, HADHA, DARS2, NAXE, DNAJA3, TRMT6, RPL13, UBE2M, POP1, RPL13A, TYMS, PSMD3, DDX6, PPP2R1A, CAPN1, RPS14, HSD17B12, SLIRP, ATP6V1B2, GNAS, AGPS, EZR, FUBP3, SNRNP200, TXNL1, YWHAB, COASY, HSP90AB1, SEH1L, GLUD1, TRIM28, RPL26, IDH2, PSMB2, PRMT5, YARS2, IM…
organelle organization	5.70637e-33	GO:0006996	430	257.263	3620	SPTBN1, TIMM44, SPTBN2, XPO1, EIF2A, HARS, TIMM50, NDUFC2, YME1L1, DARS2, MYO1B, DNAJA3, DDX6, PPP2R1A, RPS14, SLIRP, ATP6V1B2, EZR, YWHAB, SEH1L, TRIM28, PRMT5, YARS2, CAPZB, SEC31A, G3BP1, CNN3, KIF5B, USP9X, CKAP5, MSH6, CNOT1, AAAS, HUWE1, DDX3X, HMGB2, DPYSL2, VAT1, NAA50, SMARCA4, RAB10, RPL10, VTA1, SAFB, PHB2, DNM2, GFM1, CCT3, BUB3, SUPT5H, MAPRE1, NUP153, PDS5A, SUPT16H, CCDC47, EML4, C…
protein transport	6.09378e-33	GO:0015031	264	127.637	1796	SPTBN1, SRP54, TIMM44, ARF5, GAPVD1, IPO5, XPO1, TIMM50, RPL13, RPL13A, RPS14, ATP6V1B2, EZR, IPO7, YWHAB, HSP90AB1, SEH1L, GLUD1, TRIM28, RPL26, SEC31A, PTPN11, IPO9, AP3M1, ARF3, COPB2, AAAS, HUWE1, SRP68, RAB10, RPL10, VTA1, PHB2, DNM2, RPS24, XPO7, NUP153, RPS3A, RPL23A, NPM1, NUP133, RPL34, ATP6V1A, SEC13, COPB1, PFKL, CLTC, RPL17, VPS26A, RPS27A, RPS20, TNPO3, COPG2, SSR1, RPS13, BSG, TBC1D…
organic acid metabolic process	1.08615e-32	GO:0006082	173	66.8742	941	LDHB, LDHA, FARSA, PDHA1, DECR1, HARS, HADHA, DARS2, PSMD3, HSD17B12, GLUD1, IDH2, PSMB2, YARS2, PSMD14, AARS, PSMD11, PSMB5, LRRC47, PRPS1, ENO1, GFPT1, PSMA4, GSS, IDH3B, TPI1, ACOT7, DHFR, FAH, FH, GMPS, SORD, PFKL, PFKP, PSMA7, IDH3A, BSG, MPST, GART, PDXDC1, SHMT1, ASS1, MDH1, SLC16A1, ADSS, CYB5R3, PGD, ACSL3, ACO2, PKM, PSMD8, PPA2, ACACA, FASN, CTPS1, IDH1, ETFB, EIF4A3, PSMC3, TARS, DLAT…
carboxylic acid metabolic process	2.75027e-32	GO:0019752	162	60.6203	853	LDHB, LDHA, FARSA, PDHA1, DECR1, HARS, HADHA, DARS2, PSMD3, HSD17B12, GLUD1, IDH2, PSMB2, YARS2, PSMD14, AARS, PSMD11, PSMB5, LRRC47, ENO1, GFPT1, PSMA4, GSS, IDH3B, TPI1, ACOT7, DHFR, FAH, FH, GMPS, SORD, PFKL, PFKP, PSMA7, BSG, MPST, GART, PDXDC1, SHMT1, ASS1, MDH1, SLC16A1, ADSS, CYB5R3, PGD, ACSL3, ACO2, PKM, PSMD8, PPA2, ACACA, FASN, CTPS1, IDH1, ETFB, PSMC3, TARS, DLAT, AIMP2, IARS2, QARS, …
oxoacid metabolic process	5.63893e-32	GO:0043436	162	60.9757	858	LDHB, LDHA, FARSA, PDHA1, DECR1, HARS, HADHA, DARS2, PSMD3, HSD17B12, GLUD1, IDH2, PSMB2, YARS2, PSMD14, AARS, PSMD11, PSMB5, LRRC47, ENO1, GFPT1, PSMA4, GSS, IDH3B, TPI1, ACOT7, DHFR, FAH, FH, GMPS, SORD, PFKL, PFKP, PSMA7, BSG, MPST, GART, PDXDC1, SHMT1, ASS1, MDH1, SLC16A1, ADSS, CYB5R3, PGD, ACSL3, ACO2, PKM, PSMD8, PPA2, ACACA, FASN, CTPS1, IDH1, ETFB, PSMC3, TARS, DLAT, AIMP2, IARS2, QARS, …
protein localization	7.33228e-32	GO:0008104	315	167.505	2357	SPTBN1, SSB, SRP54, TIMM44, RSL1D1, ARF5, GAPVD1, IPO5, XPO1, TIMM50, DNAJA3, RPL13, RPL13A, RPS14, ATP6V1B2, EZR, IPO7, YWHAB, HSP90AB1, SEH1L, GLUD1, TRIM28, RPL26, SEC31A, PTPN11, KIF5B, IPO9, AP3M1, ARF3, COPB2, AAAS, HUWE1, DDX3X, SRP68, RAB10, RPL10, VTA1, HSPH1, PHB2, DNM2, CCT3, RPS24, MAPRE1, XPO7, NUP153, RPS3A, SCRIB, RPL23A, NPM1, NUP133, RPL34, ATP6V1A, SEC13, HNRNPK, COPB1, PFKL, CL…
mitotic cell cycle	7.27212e-31	GO:0000278	170	67.2296	946	SPTBN1, RNASEH2B, TYMS, PSMD3, PPP2R1A, SEH1L, PSMB2, PRMT5, PTPN11, GSPT1, USP9X, PSMD14, CKAP5, PSMD11, CNOT9, CNOT1, AAAS, DDX3X, PSMB5, NAA50, SMARCA4, PHB2, PSMA4, DNM2, BUB3, MAPRE1, NUP153, PDS5A, EML4, SCRIB, NPM1, NUP133, DHFR, MRE11A, PAK2, CLTC, RPS27A, PSMA7, SKP1, CUL2, SEPT2, HSP90AA1, FANCI, PSMD8, KPNB1, MAD2L1, CDK2, SLFN11, PPP1CB, CUL3, PTPA, UBE2I, MCM6, PSMC3, TUBB4B, NUP93, …
mitotic cell cycle process	8.86076e-31	GO:1903047	161	61.7574	869	SPTBN1, RNASEH2B, TYMS, PSMD3, PPP2R1A, SEH1L, PSMB2, PRMT5, GSPT1, USP9X, PSMD14, CKAP5, PSMD11, CNOT9, CNOT1, AAAS, DDX3X, PSMB5, NAA50, SMARCA4, PHB2, PSMA4, DNM2, BUB3, MAPRE1, NUP153, PDS5A, EML4, NPM1, NUP133, DHFR, MRE11A, CLTC, RPS27A, PSMA7, SKP1, CUL2, SEPT2, HSP90AA1, FANCI, PSMD8, KPNB1, MAD2L1, CDK2, SLFN11, PPP1CB, CUL3, PTPA, UBE2I, MCM6, PSMC3, TUBB4B, NUP93, USP47, ANXA1, MAP4, N…
small molecule metabolic process	1.05178e-30	GO:0044281	269	135.241	1903	LDHB, LDHA, AK2, FARSA, PDHA1, DECR1, HARS, RNASEH2B, NDUFC2, HADHA, DARS2, NAXE, TYMS, PSMD3, HSD17B12, ATP6V1B2, AGPS, TXNL1, COASY, GLUD1, IDH2, PSMB2, YARS2, IMPDH2, ATP5A1, PSMD14, AARS, PSMD11, ATP5F1, PSMB5, LRRC47, PRPS1, ATIC, ENO1, GFPT1, PSMA4, SULT1A1, GSS, IDH3B, TPI1, ACOT7, CNP, DHFR, FAH, FH, GMPS, ATP6V1A, NDUFA9, SORD, MAT2B, PFKL, PFKP, CYC1, PSMA7, IDH3A, BSG, MPST, GART, PDXD…
regulation of RNA stability	1.08413e-30	GO:0043487	58	9.80728	138	PARN, XPO1, PSMD3, YWHAB, PSMB2, HNRNPD, PSMD14, PSMD11, PSMB5, PSMA4, RPS27A, PSMA7, SYNCRIP, EXOSC2, HNRNPA0, PSMD8, YBX1, PABPC1, PSMC3, HNRNPC, UPF1, ELAVL1, EIF4G1, PSMB4, SERBP1, PSMD7, HSPA1A, PSMD10, PSMF1, TNPO1, PSMD13, PSMC5, TARDBP, PSMD1, THRAP3, PSMD2, DIS3, PSMB7, DKC1, IGF2BP1, PSMC2, PSMA1, PSMC1, PSMC4, PSMA2, PAIP1, PSMD12, PSMB3, PSMD6, PSMA3, DHX9, APEX1, PSMB1, YTHDF2, PSMC6…
regulation of mRNA stability	1.61488e-30	GO:0043488	57	9.52301	134	PARN, XPO1, PSMD3, YWHAB, PSMB2, HNRNPD, PSMD14, PSMD11, PSMB5, PSMA4, RPS27A, PSMA7, SYNCRIP, EXOSC2, HNRNPA0, PSMD8, YBX1, PABPC1, PSMC3, HNRNPC, UPF1, ELAVL1, EIF4G1, PSMB4, SERBP1, PSMD7, HSPA1A, PSMD10, PSMF1, TNPO1, PSMD13, PSMC5, TARDBP, PSMD1, THRAP3, PSMD2, DIS3, PSMB7, IGF2BP1, PSMC2, PSMA1, PSMC1, PSMC4, PSMA2, PAIP1, PSMD12, PSMB3, PSMD6, PSMA3, DHX9, APEX1, PSMB1, YTHDF2, PSMC6, PSME…
multi-organism process	3.18919e-30	GO:0051704	311	167.79	2361	SSB, PARN, ANXA3, IPO5, XPO1, NDRG3, RPL13, RPL13A, TYMS, DDX6, PPP2R1A, RPS14, SLIRP, IPO7, YWHAB, HSP90AB1, SEH1L, TRIM28, RPL26, PSMB2, SLC38A2, USP9X, RPS6KA3, GSTP1, MSH6, EIF4H, TRIM25, EIF3L, AAAS, DDX3X, HMGB2, PSMB5, SMARCA4, MTDH, RPL10, VTA1, ENO1, PSMA4, DNM2, CCT3, SPAG9, SUPT5H, RPS24, NUP153, RPS3A, EIF3G, SCRIB, RPL23A, NPM1, NUP133, CTBP2, RPL34, CNP, BYSL, ZC3HAV1, HNRNPK, COPB1…
membrane organization	6.04382e-30	GO:0061024	176	72.2043	1016	SPTBN1, SRP54, TIMM50, DNAJA3, RPL13, RPL13A, PPP2R1A, RPS14, EZR, YWHAB, SEH1L, RPL26, SEC31A, KIF5B, AAAS, SRP68, VAT1, RAB10, RPL10, VTA1, DNM2, RPS24, NUP153, RPS3A, RPL23A, NUP133, RPL34, CNP, SEC13, CLTC, RPL17, RPS27A, RPS20, SSR1, RPS13, BSG, TBC1D15, SEC24A, RPL24, MYOF, RPL18, YWHAQ, HSP90AA1, ACSL3, RPL5, RPS27, SEC24C, RAB1B, RAB7A, RAC1, TMED10, RPL27, SRP14, RPL12, RPL6, NSF, RPL38,…
regulation of translation	3.54046e-29	GO:0006417	89	23.4522	330	EIF2A, RPL13A, DDX6, RPS14, HNRNPD, RPS6KA3, RBM4, AARS, EIF4H, CNOT9, CNOT1, EIF3L, DDX3X, EIF3G, NPM1, POLDIP3, KRT17, SYNCRIP, EEF2, PABPC1, RPL38, PPP1CA, PA2G4, EIF4A3, EIF3B, MAPK1, IARS2, EIF3E, UPF1, ELAVL1, EIF4G1, EPRS, EIF3A, IGF2BP3, ETF1, RPS4X, EIF5A, EIF5, EIF4A1, EIF6, SRRT, CDK4, YTHDF1, FXR1, EIF3D, EIF3H, KHDRBS1, FXR2, EIF3M, RPS27L, LARS, RPS9, DDX39B, MAPK3, C1QBP, RACK1, DT…
regulation of cellular amide metabolic process	5.46397e-29	GO:0034248	93	25.5131	359	EIF2A, RPL13A, DDX6, RPS14, HNRNPD, RPS6KA3, RBM4, AARS, EIF4H, CNOT9, CNOT1, EIF3L, DDX3X, EIF3G, NPM1, POLDIP3, KRT17, SYNCRIP, EEF2, TMED10, PABPC1, RPL38, PPP1CA, PA2G4, EIF4A3, EIF3B, MAPK1, IARS2, EIF3E, UPF1, ELAVL1, EIF4G1, EPRS, EIF3A, IGF2BP3, ETF1, RPS4X, EIF5A, EIF5, EIF4A1, EIF6, PICALM, SRRT, CDK4, YTHDF1, FXR1, EIF3D, EIF3H, CLU, KHDRBS1, FXR2, EIF3M, RPS27L, LARS, RPS9, DDX39B, MA…
single-organism membrane organization	2.03801e-28	GO:0044802	155	60.9046	857	SPTBN1, SRP54, TIMM50, DNAJA3, RPL13, RPL13A, PPP2R1A, RPS14, EZR, YWHAB, SEH1L, RPL26, KIF5B, AAAS, SRP68, VAT1, RAB10, RPL10, DNM2, RPS24, NUP153, RPS3A, RPL23A, NUP133, RPL34, CNP, CLTC, RPL17, RPS27A, RPS20, SSR1, RPS13, BSG, TBC1D15, RPL24, MYOF, RPL18, YWHAQ, HSP90AA1, ACSL3, RPL5, RPS27, RAB7A, RAC1, RPL27, SRP14, RPL12, RPL6, NSF, RPL38, RER1, YKT6, RPL9, ANXA2, RPS15, SRP72, NUP93, RPS2,…
protein localization to membrane	2.32294e-28	GO:0072657	108	33.6859	474	SPTBN1, SRP54, DNAJA3, RPL13, RPL13A, RPS14, EZR, YWHAB, RPL26, KIF5B, SRP68, RAB10, RPL10, RPS24, RPS3A, RPL23A, RPL34, CLTC, RPL17, RPS27A, RPS20, SSR1, RPS13, BSG, RPL24, RPL18, YWHAQ, HSP90AA1, ACSL3, RPL5, RPS27, RAC1, RPL27, SRP14, RPL12, RPL6, NSF, RPL38, RER1, RPL9, ANXA2, RPS15, SRP72, RPS2, NDUFA13, RPL31, YWHAE, AP2M1, RPLP2, AP3D1, RPS4X, RPL35A, RPL7, RPS26, SRPRB, RPS23, RPL35, RPL8…
antigen processing and presentation of exogenous antigen	7.58385e-28	GO:0019884	61	12.0104	169	SPTBN2, PSMD3, PSMB2, SEC31A, PSMD14, PSMD11, PSMB5, PSMA4, DNM2, CTSD, SEC13, CLTC, PSMA7, SEC24A, AP3B1, PSMD8, SEC24C, RAB7A, PSMC3, AP2B1, AP1M1, PSMB4, AP2M1, AP3D1, AP1G1, KIF11, AP1B1, SEC24B, SEC23A, PSMD7, PSMD10, DYNC1I2, DYNC1H1, PSMF1, DYNLL1, AP2A2, HLA-C, PSMD13, PSMC5, DCTN1, HLA-B, PSMD1, PSMD2, SAR1B, DCTN2, AP2A1, PSMB7, PSMC2, PSMA1, PSMC1, PSMC4, PSMA2, PSMD12, PSMB3, PSMD6, P…
gene expression	1.27793e-27	GO:0010467	542	370.26	5210	SSB, RBMX, PARN, ANXA3, RSL1D1, FARSA, XPO1, EIF2A, HARS, RNASEH2B, DARS2, DNAJA3, TRMT6, RPL13, POP1, RPL13A, TYMS, PSMD3, DDX6, PPP2R1A, CAPN1, RPS14, SLIRP, EZR, FUBP3, SNRNP200, YWHAB, SEH1L, TRIM28, RPL26, PSMB2, PRMT5, YARS2, SRSF2, GSPT1, USP9X, HNRNPD, SRSF7, SRSF5, PSMD14, RPS6KA3, HNRNPH1, RBM4, AARS, PSMD11, EIF4H, CNOT9, TRIM25, CNOT1, HNRNPDL, EIF3L, AAAS, DDX3X, HMGB2, PSMB5, CSTF1,…
antigen processing and presentation of exogenous peptide antigen	3.26961e-27	GO:0002478	59	11.5129	162	SPTBN2, PSMD3, PSMB2, SEC31A, PSMD14, PSMD11, PSMB5, PSMA4, DNM2, CTSD, SEC13, CLTC, PSMA7, SEC24A, PSMD8, SEC24C, RAB7A, PSMC3, AP2B1, AP1M1, PSMB4, AP2M1, AP1G1, KIF11, AP1B1, SEC24B, SEC23A, PSMD7, PSMD10, DYNC1I2, DYNC1H1, PSMF1, DYNLL1, AP2A2, HLA-C, PSMD13, PSMC5, DCTN1, HLA-B, PSMD1, PSMD2, SAR1B, DCTN2, AP2A1, PSMB7, PSMC2, PSMA1, PSMC1, PSMC4, PSMA2, PSMD12, PSMB3, PSMD6, PSMA3, ACTR1A, …
cell cycle process	5.10467e-27	GO:0022402	200	92.4584	1301	SPTBN1, XPO1, RNASEH2B, TYMS, PSMD3, PPP2R1A, EZR, SEH1L, PSMB2, PRMT5, PTPN11, GSPT1, USP9X, PSMD14, CKAP5, MSH6, PSMD11, CNOT9, CNOT1, AAAS, DDX3X, PSMB5, NAA50, SMARCA4, CAB39, PHB2, PSMA4, DNM2, BUB3, MAPRE1, NUP153, PDS5A, EML4, NPM1, NUP133, DHFR, SEC13, SFPQ, MRE11A, CLTC, RPS27A, PSMA7, SKP1, CUL2, PNPT1, SEPT2, ACTR3, HSP90AA1, ARL3, FANCI, PSMD8, KPNB1, RPS27, SART1, MAD2L1, CDK2, SLFN1…
cellular protein metabolic process	1.24196e-26	GO:0044267	503	337.996	4756	SPTBN1, SSB, RSL1D1, FARSA, SPTBN2, EIF2A, HARS, TIMM50, YME1L1, DARS2, RPL13, UBE2M, RPL13A, PSMD3, DDX6, PPP2R1A, RPS14, EZR, YWHAB, HSP90AB1, SEH1L, TRIM28, RPL26, PSMB2, PRMT5, YARS2, PTPN11, CFAP20, GSPT1, USP9X, HNRNPD, PSMD14, RPS6KA3, GSTP1, RBM4, AARS, PSMD11, EIF4H, CNOT9, TRIM25, CNOT1, EIF3L, AAAS, HUWE1, DDX3X, PSMB5, LRRC47, NAA50, CAB39, RPL10, HSPH1, EEF1A1, PHB2, PSMA4, GFM1, SPA…
organic substance transport	2.26783e-26	GO:0071702	320	183.353	2580	SPTBN1, SRP54, TIMM44, ARF5, GAPVD1, IPO5, XPO1, TIMM50, RPL13, RPL13A, RPS14, ATP6V1B2, EZR, IPO7, YWHAB, HSP90AB1, SEH1L, GLUD1, TRIM28, RPL26, SLC38A2, SEC31A, PTPN11, SRSF2, SRSF7, IPO9, SRSF5, AP3M1, ARF3, CKAP5, COPB2, AAAS, HUWE1, SRP68, DPYSL2, RAB10, RPL10, VTA1, PHB2, DNM2, RPS24, XPO7, NUP153, RPS3A, RPL23A, NPM1, NUP133, RPL34, SRSF6, ATP6V1A, POLDIP3, SEC13, HNRNPK, COPB1, PFKL, CLTC…
nucleic acid transport	3.04083e-26	GO:0050657	59	11.9393	168	XPO1, SEH1L, SRSF2, SRSF7, SRSF5, CKAP5, AAAS, XPO7, NUP153, NUP133, SRSF6, POLDIP3, SEC13, PNPT1, HNRNPA3, CPSF2, U2AF1, THOC2, C14orf166, DDX19B, EIF4A3, NUP93, U2AF2, UPF1, SRSF1, NUP98, NUP210, IGF2BP3, EIF5A, G3BP2, RPSA, RAE1, RANBP2, SRSF3, KHDRBS1, NOL6, NUP155, NUP205, SRSF11, NUP107, DDX39B, LRPPRC, RAN, IGF2BP2, IGF2BP1, NCBP1, XPO5, NUP160, CHTOP, SRRM1, NUP85, SRSF10, HNRNPA2B1, ALYR…
RNA transport	3.04083e-26	GO:0050658	59	11.9393	168	XPO1, SEH1L, SRSF2, SRSF7, SRSF5, CKAP5, AAAS, XPO7, NUP153, NUP133, SRSF6, POLDIP3, SEC13, PNPT1, HNRNPA3, CPSF2, U2AF1, THOC2, C14orf166, DDX19B, EIF4A3, NUP93, U2AF2, UPF1, SRSF1, NUP98, NUP210, IGF2BP3, EIF5A, G3BP2, RPSA, RAE1, RANBP2, SRSF3, KHDRBS1, NOL6, NUP155, NUP205, SRSF11, NUP107, DDX39B, LRPPRC, RAN, IGF2BP2, IGF2BP1, NCBP1, XPO5, NUP160, CHTOP, SRRM1, NUP85, SRSF10, HNRNPA2B1, ALYR…
establishment of RNA localization	8.87526e-26	GO:0051236	59	12.1525	171	XPO1, SEH1L, SRSF2, SRSF7, SRSF5, CKAP5, AAAS, XPO7, NUP153, NUP133, SRSF6, POLDIP3, SEC13, PNPT1, HNRNPA3, CPSF2, U2AF1, THOC2, C14orf166, DDX19B, EIF4A3, NUP93, U2AF2, UPF1, SRSF1, NUP98, NUP210, IGF2BP3, EIF5A, G3BP2, RPSA, RAE1, RANBP2, SRSF3, KHDRBS1, NOL6, NUP155, NUP205, SRSF11, NUP107, DDX39B, LRPPRC, RAN, IGF2BP2, IGF2BP1, NCBP1, XPO5, NUP160, CHTOP, SRRM1, NUP85, SRSF10, HNRNPA2B1, ALYR…
mitotic cell cycle phase transition	3.23206e-25	GO:0044772	105	34.894	491	RNASEH2B, TYMS, PSMD3, PPP2R1A, PSMB2, GSPT1, PSMD14, CKAP5, PSMD11, CNOT9, CNOT1, DDX3X, PSMB5, SMARCA4, PHB2, PSMA4, DNM2, BUB3, MAPRE1, NPM1, DHFR, MRE11A, RPS27A, PSMA7, SKP1, CUL2, HSP90AA1, FANCI, PSMD8, MAD2L1, CDK2, SLFN11, PPP1CB, CUL3, MCM6, PSMC3, TUBB4B, USP47, ANXA1, CSNK2A2, PCNA, MCM4, YWHAE, PSMB4, TUBB4A, MCM5, YWHAG, PSMD7, PRKDC, PSMD10, POLA2, CDK4, RPA1, DYNC1I2, DYNC1H1, PPA…
antigen processing and presentation of peptide antigen	3.85782e-25	GO:0048002	60	12.8632	181	SPTBN2, PSMD3, PSMB2, SEC31A, PSMD14, PSMD11, PSMB5, PSMA4, DNM2, CTSD, SEC13, CLTC, PSMA7, SEC24A, PSMD8, SEC24C, RAB7A, PDIA3, PSMC3, AP2B1, AP1M1, PSMB4, AP2M1, AP1G1, KIF11, AP1B1, SEC24B, SEC23A, PSMD7, PSMD10, DYNC1I2, DYNC1H1, PSMF1, DYNLL1, AP2A2, HLA-C, PSMD13, PSMC5, DCTN1, HLA-B, PSMD1, PSMD2, SAR1B, DCTN2, AP2A1, PSMB7, PSMC2, PSMA1, PSMC1, PSMC4, PSMA2, PSMD12, PSMB3, PSMD6, PSMA3, A…
cellular component assembly	4.86259e-25	GO:0022607	307	176.176	2479	SPTBN1, RBMX, SRP54, SPTBN2, IPO5, PDLIM5, DECR1, EIF2A, NDUFC2, NAXE, MYO1B, RPL13A, DDX6, PPP2R1A, RPS14, EZR, SNRNP200, YWHAB, TRIM28, PRMT5, CAPZB, IMPDH2, SEC31A, PTPN11, PLEC, SRSF5, NCLN, PSMD11, EIF4H, ANXA6, CNOT1, EIF3L, DDX3X, HMGB2, SMARCA4, CAB39, MTDH, RPL10, VTA1, LUC7L2, GFPT1, DNM2, CCT3, SPAG9, MAPRE1, CPSF7, NUP153, EIF3G, RPL23A, NPM1, HIST1H4A, NAP1L4, FH, SMARCA5, RBBP7, SRS…
cell cycle phase transition	1.79818e-24	GO:0044770	107	36.7417	517	RNASEH2B, TYMS, PSMD3, PPP2R1A, PSMB2, GSPT1, PSMD14, CKAP5, PSMD11, CNOT9, CNOT1, DDX3X, PSMB5, SMARCA4, PHB2, PSMA4, DNM2, BUB3, MAPRE1, NPM1, DHFR, MRE11A, RPS27A, PSMA7, SKP1, CUL2, HSP90AA1, FANCI, PSMD8, MAD2L1, CDK2, SLFN11, PPP1CB, CUL3, MCM6, PSMC3, TUBB4B, USP47, CDC5L, ANXA1, CSNK2A2, PCNA, MCM4, YWHAE, PSMB4, TUBB4A, MCM5, YWHAG, PSMD7, PRKDC, PSMD10, POLA2, CDK4, RPA1, DYNC1I2, DYNC1…
organic substance biosynthetic process	3.11623e-24	GO:1901576	594	429.886	6049	SSB, RBMX, ANXA3, AK2, RSL1D1, FARSA, PDHA1, SRM, XPO1, EIF2A, HARS, DARS2, DNAJA3, RPL13, RPL13A, TYMS, DDX6, PPP2R1A, RPS14, HSD17B12, SLIRP, AGPS, EZR, FUBP3, YWHAB, COASY, SEH1L, GLUD1, TRIM28, RPL26, PRMT5, YARS2, IMPDH2, PTPN11, SRSF2, GSPT1, USP9X, HNRNPD, ATP5A1, SRSF7, SRSF5, ARF3, RPS6KA3, GSTP1, RBM4, AARS, EIF4H, UGP2, CNOT9, TRIM25, CNOT1, HNRNPDL, EIF3L, AAAS, DDX3X, HMGB2, ATP5F1, …
cell cycle	3.15551e-24	GO:0007049	230	118.895	1673	SPTBN1, XPO1, RNASEH2B, TYMS, PSMD3, PPP2R1A, EZR, SEH1L, PSMB2, PRMT5, PTPN11, GSPT1, USP9X, SRSF5, PSMD14, CKAP5, RPS6KA3, MSH6, PSMD11, CNOT9, CNOT1, AAAS, DDX3X, PSMB5, NAA50, SMARCA4, CAB39, PHB2, PSMA4, DNM2, BUB3, SUPT5H, MAPRE1, NUP153, PDS5A, EML4, SCRIB, NPM1, NUP133, DHFR, SEC13, SFPQ, MRE11A, PAK2, CLTC, RPS27A, SEPT9, PSMA7, SKP1, CUL2, PNPT1, SEPT2, ACTR3, HCFC1, HSP90AA1, ARL3, FAN…
biosynthetic process	3.50341e-24	GO:0009058	601	436.708	6145	SSB, RBMX, ANXA3, AK2, RSL1D1, FARSA, PDHA1, SRM, XPO1, EIF2A, HARS, DARS2, DNAJA3, RPL13, RPL13A, TYMS, DDX6, PPP2R1A, RPS14, HSD17B12, SLIRP, AGPS, EZR, FUBP3, YWHAB, COASY, HSP90AB1, SEH1L, GLUD1, TRIM28, RPL26, PRMT5, YARS2, IMPDH2, PTPN11, SRSF2, GSPT1, USP9X, HNRNPD, ATP5A1, SRSF7, SRSF5, ARF3, RPS6KA3, GSTP1, RBM4, AARS, EIF4H, UGP2, CNOT9, TRIM25, CNOT1, HNRNPDL, EIF3L, AAAS, DDX3X, HMGB2…
ribonucleoprotein complex localization	4.36065e-24	GO:0071166	48	8.6702	122	XPO1, SEH1L, SRSF2, SRSF7, SRSF5, AAAS, NUP153, NUP133, SRSF6, POLDIP3, CPSF2, U2AF1, THOC2, PRPF31, DDX19B, EIF4A3, RPS15, NUP93, U2AF2, UPF1, SRSF1, NUP98, NUP210, EIF5A, EIF6, RPSA, RAE1, RANBP2, SRSF3, NOL6, NUP155, NUP205, SRSF11, NUP107, DDX39B, RAN, NOP58, NCBP1, NUP160, CHTOP, SRRM1, NUP85, SRSF10, HNRNPA2B1, ALYREF, XPOT, RNPS1, SRSF9
antigen processing and presentation	2.25602e-23	GO:0019882	65	15.9901	225	SPTBN2, PSMD3, PSMB2, SEC31A, PSMD14, PSMD11, PSMB5, RAB10, PSMA4, DNM2, CTSD, SEC13, CLTC, PSMA7, SEC24A, AP3B1, PSMD8, SEC24C, RAB7A, PDIA3, PSMC3, AP2B1, AP1M1, PSMB4, AP2M1, AP3D1, AP1G1, KIF11, AP1B1, SEC24B, SEC23A, RAB5B, PSMD7, PSMD10, DYNC1I2, DYNC1H1, PSMF1, DYNLL1, AP2A2, HLA-C, PSMD13, PSMC5, DCTN1, HLA-B, PSMD1, PSMD2, SAR1B, DCTN2, AP2A1, PSMB7, PSMC2, PSMA1, PSMC1, PSMC4, PSMA2, PS…
nucleobase-containing compound transport	4.045e-23	GO:0015931	61	14.3556	202	XPO1, SEH1L, SRSF2, SRSF7, SRSF5, CKAP5, AAAS, XPO7, NUP153, NUP133, SRSF6, POLDIP3, SEC13, PNPT1, HNRNPA3, CPSF2, U2AF1, THOC2, C14orf166, DDX19B, EIF4A3, NUP93, U2AF2, UPF1, SRSF1, NUP98, NUP210, IGF2BP3, SLC25A6, EIF5A, G3BP2, RPSA, RAE1, RANBP2, SRSF3, KHDRBS1, NOL6, NUP155, NUP205, SRSF11, NUP107, DDX39B, LRPPRC, RAN, IGF2BP2, IGF2BP1, NCBP1, XPO5, NUP160, CHTOP, SRRM1, SLC25A24, NUP85, SRSF…
nucleoside monophosphate metabolic process	6.17358e-23	GO:0009123	73	20.041	282	LDHA, AK2, NDUFC2, TYMS, ATP6V1B2, IMPDH2, ATP5A1, ATP5F1, PRPS1, ATIC, ENO1, TPI1, GMPS, ATP6V1A, NDUFA9, PFKL, PFKP, CYC1, GART, ATP5L, SHMT1, ADSS, PKM, ATP5O, CMPK1, UQCRC2, COX4I1, NDUFA13, GPI, PRKAG1, NDUFB4, DNM1L, HK1, STOML2, COX6C, DLD, SLC25A13, EIF6, CAD, MSH2, HSPA1A, ATP5H, NDUFA4, PPAT, PAICS, PGK1, NDUFS2, ATP5B, NDUFA10, GALK1, TIGAR, ATP5J2, NDUFV1, CYCS, ALDOC, AK1, VCP, PGM1,…
cellular biosynthetic process	7.78609e-23	GO:0044249	581	422.566	5946	SSB, RBMX, ANXA3, AK2, RSL1D1, FARSA, PDHA1, SRM, XPO1, EIF2A, HARS, DARS2, DNAJA3, RPL13, RPL13A, TYMS, DDX6, PPP2R1A, RPS14, HSD17B12, SLIRP, AGPS, EZR, FUBP3, YWHAB, COASY, HSP90AB1, SEH1L, GLUD1, TRIM28, RPL26, PRMT5, YARS2, IMPDH2, PTPN11, SRSF2, GSPT1, USP9X, HNRNPD, ATP5A1, SRSF7, SRSF5, ARF3, RPS6KA3, GSTP1, RBM4, AARS, EIF4H, UGP2, CNOT9, TRIM25, CNOT1, HNRNPDL, EIF3L, AAAS, DDX3X, HMGB2…
ribonucleoside monophosphate metabolic process	9.0594e-23	GO:0009161	71	19.1881	270	LDHA, AK2, NDUFC2, ATP6V1B2, IMPDH2, ATP5A1, ATP5F1, PRPS1, ATIC, ENO1, TPI1, GMPS, ATP6V1A, NDUFA9, PFKL, PFKP, CYC1, GART, ATP5L, ADSS, PKM, ATP5O, CMPK1, UQCRC2, COX4I1, NDUFA13, GPI, PRKAG1, NDUFB4, DNM1L, HK1, STOML2, COX6C, DLD, SLC25A13, EIF6, CAD, MSH2, HSPA1A, ATP5H, NDUFA4, PPAT, PAICS, PGK1, NDUFS2, ATP5B, NDUFA10, GALK1, TIGAR, ATP5J2, NDUFV1, CYCS, ALDOC, AK1, VCP, PGM1, UMPS, APRT, …
protein metabolic process	9.30498e-23	GO:0019538	529	374.311	5267	SPTBN1, SSB, RBMX, RSL1D1, FARSA, SPTBN2, XPO1, EIF2A, HARS, TIMM50, YME1L1, DARS2, RPL13, UBE2M, RPL13A, PSMD3, DDX6, PPP2R1A, CAPN1, RPS14, EZR, YWHAB, HSP90AB1, SEH1L, TRIM28, RPL26, PSMB2, PRMT5, YARS2, PTPN11, CFAP20, GSPT1, USP9X, HNRNPD, CAPNS1, PSMD14, RPS6KA3, GSTP1, RBM4, AARS, PSMD11, EIF4H, CNOT9, TRIM25, CNOT1, EIF3L, AAAS, HUWE1, DDX3X, PSMB5, LRRC47, NAA50, CAB39, RPL10, HSPH1, EEF…
ribonucleoprotein complex export from nucleus	9.36747e-23	GO:0071426	46	8.457	119	XPO1, SEH1L, SRSF2, SRSF7, SRSF5, AAAS, NUP153, NUP133, SRSF6, POLDIP3, CPSF2, U2AF1, THOC2, DDX19B, EIF4A3, RPS15, NUP93, U2AF2, UPF1, SRSF1, NUP98, NUP210, EIF5A, EIF6, RPSA, RAE1, RANBP2, SRSF3, NOL6, NUP155, NUP205, SRSF11, NUP107, DDX39B, RAN, NCBP1, NUP160, CHTOP, SRRM1, NUP85, SRSF10, HNRNPA2B1, ALYREF, XPOT, RNPS1, SRSF9
RNA export from nucleus	9.36747e-23	GO:0006405	46	8.457	119	SEH1L, SRSF2, SRSF7, SRSF5, AAAS, NUP153, NUP133, SRSF6, POLDIP3, CPSF2, U2AF1, THOC2, DDX19B, EIF4A3, NUP93, U2AF2, UPF1, SRSF1, NUP98, NUP210, EIF5A, RPSA, RAE1, RANBP2, SRSF3, KHDRBS1, NOL6, NUP155, NUP205, SRSF11, NUP107, DDX39B, RAN, NCBP1, XPO5, NUP160, CHTOP, SRRM1, NUP85, SRSF10, HNRNPA2B1, ALYREF, XPOT, HNRNPA1, RNPS1, SRSF9
mRNA transport	1.20583e-22	GO:0051028	50	10.0205	141	XPO1, SEH1L, SRSF2, SRSF7, SRSF5, AAAS, XPO7, NUP153, NUP133, SRSF6, POLDIP3, SEC13, HNRNPA3, CPSF2, U2AF1, THOC2, DDX19B, EIF4A3, NUP93, U2AF2, UPF1, SRSF1, NUP98, NUP210, IGF2BP3, EIF5A, G3BP2, RAE1, RANBP2, SRSF3, NUP155, NUP205, SRSF11, NUP107, DDX39B, LRPPRC, IGF2BP2, IGF2BP1, NCBP1, NUP160, CHTOP, SRRM1, NUP85, SRSF10, HNRNPA2B1, ALYREF, MAGOHB, HNRNPA1, RNPS1, SRSF9
nucleocytoplasmic transport	2.1785e-22	GO:0006913	95	32.0513	451	SPTBN1, IPO5, XPO1, IPO7, HSP90AB1, SEH1L, TRIM28, PTPN11, SRSF2, SRSF7, IPO9, SRSF5, RBM4, AAAS, PHB2, XPO7, NUP153, NPM1, NUP133, SRSF6, POLDIP3, TNPO3, CPSF2, HSP90AA1, U2AF1, THOC2, KPNB1, KPNA6, PDIA3, DDX19B, EIF4A3, RPS15, IPO4, MAPK1, NUP93, U2AF2, UPF1, SRSF1, NUP98, SNRPB, NUP210, SNRPD1, SNRPD3, EIF5A, G3BP2, KPNA3, LMNA, EIF6, RPSA, SNRPE, PSMD10, POLA2, RAE1, ANP32B, RANBP2, TNPO1, S…
nuclear transport	2.22323e-22	GO:0051169	96	32.6199	459	SPTBN1, IPO5, XPO1, IPO7, HSP90AB1, SEH1L, TRIM28, PTPN11, SRSF2, SRSF7, IPO9, SRSF5, RBM4, AAAS, PHB2, XPO7, NUP153, NPM1, NUP133, SRSF6, POLDIP3, TNPO3, CPSF2, HSP90AA1, U2AF1, THOC2, KPNB1, KPNA6, PDIA3, DDX19B, EIF4A3, RPS15, IPO4, MAPK1, NUP93, U2AF2, UPF1, SRSF1, NUP98, SNRPB, NUP210, PSIP1, SNRPD1, SNRPD3, EIF5A, G3BP2, KPNA3, LMNA, EIF6, RPSA, SNRPE, PSMD10, POLA2, RAE1, ANP32B, RANBP2, T…
antigen processing and presentation of peptide antigen via MHC class I	3.18475e-22	GO:0002474	40	6.53818	92	PSMD3, PSMB2, SEC31A, PSMD14, PSMD11, PSMB5, PSMA4, SEC13, PSMA7, SEC24A, PSMD8, SEC24C, PDIA3, PSMC3, PSMB4, SEC24B, SEC23A, PSMD7, PSMD10, PSMF1, HLA-C, PSMD13, PSMC5, HLA-B, PSMD1, PSMD2, SAR1B, PSMB7, PSMC2, PSMA1, PSMC1, PSMC4, PSMA2, PSMD12, PSMB3, PSMD6, PSMA3, PSMB1, PSMC6, PSME3
purine ribonucleoside monophosphate metabolic process	5.10873e-22	GO:0009167	68	18.2643	257	LDHA, AK2, NDUFC2, ATP6V1B2, IMPDH2, ATP5A1, ATP5F1, PRPS1, ATIC, ENO1, TPI1, GMPS, ATP6V1A, NDUFA9, PFKL, PFKP, CYC1, GART, ATP5L, ADSS, PKM, ATP5O, UQCRC2, COX4I1, NDUFA13, GPI, PRKAG1, NDUFB4, DNM1L, HK1, STOML2, COX6C, DLD, SLC25A13, EIF6, MSH2, HSPA1A, ATP5H, NDUFA4, PPAT, PAICS, PGK1, NDUFS2, ATP5B, NDUFA10, GALK1, TIGAR, ATP5J2, NDUFV1, CYCS, ALDOC, AK1, VCP, PGM1, APRT, UQCR10, HPRT1, UQC…
purine nucleoside monophosphate metabolic process	6.47378e-22	GO:0009126	68	18.3353	258	LDHA, AK2, NDUFC2, ATP6V1B2, IMPDH2, ATP5A1, ATP5F1, PRPS1, ATIC, ENO1, TPI1, GMPS, ATP6V1A, NDUFA9, PFKL, PFKP, CYC1, GART, ATP5L, ADSS, PKM, ATP5O, UQCRC2, COX4I1, NDUFA13, GPI, PRKAG1, NDUFB4, DNM1L, HK1, STOML2, COX6C, DLD, SLC25A13, EIF6, MSH2, HSPA1A, ATP5H, NDUFA4, PPAT, PAICS, PGK1, NDUFS2, ATP5B, NDUFA10, GALK1, TIGAR, ATP5J2, NDUFV1, CYCS, ALDOC, AK1, VCP, PGM1, APRT, UQCR10, HPRT1, UQC…
cellular nitrogen compound biosynthetic process	6.58597e-22	GO:0044271	493	344.321	4845	SSB, RBMX, ANXA3, AK2, RSL1D1, FARSA, SRM, XPO1, EIF2A, HARS, DARS2, DNAJA3, RPL13, RPL13A, TYMS, DDX6, PPP2R1A, RPS14, SLIRP, EZR, FUBP3, YWHAB, COASY, HSP90AB1, SEH1L, TRIM28, RPL26, PRMT5, YARS2, IMPDH2, SRSF2, GSPT1, USP9X, HNRNPD, ATP5A1, SRSF7, SRSF5, RPS6KA3, RBM4, AARS, EIF4H, UGP2, CNOT9, TRIM25, CNOT1, HNRNPDL, EIF3L, AAAS, DDX3X, HMGB2, ATP5F1, CSTF1, LRRC47, AGK, PSPC1, SMARCA4, PRPS1…
negative regulation of ubiquitin-protein ligase activity involved in mitotic cell cycle	7.2503e-22	GO:0051436	35	5.04577	71	PSMD3, PSMB2, PSMD14, PSMD11, PSMB5, PSMA4, BUB3, RPS27A, PSMA7, PSMD8, MAD2L1, CDK2, PSMC3, PSMB4, PSMD7, PSMD10, PSMF1, PSMD13, PSMC5, PSMD1, PSMD2, PSMB7, CDK1, PSMC2, PSMA1, PSMC1, PSMC4, PSMA2, PSMD12, PSMB3, PSMD6, PSMA3, PSMB1, PSMC6, PSME3
positive regulation of ubiquitin-protein ligase activity involved in regulation of mitotic cell cycle transition	1.06505e-21	GO:0051437	36	5.40111	76	PSMD3, PSMB2, PSMD14, PSMD11, PSMB5, PSMA4, BUB3, RPS27A, PSMA7, SKP1, PSMD8, MAD2L1, PSMC3, PSMB4, PSMD7, PSMD10, PSMF1, PSMD13, PSMC5, PSMD1, PSMD2, PSMB7, CDK1, PSMC2, PSMA1, PSMC1, CUL1, PSMC4, PSMA2, PSMD12, PSMB3, PSMD6, PSMA3, PSMB1, PSMC6, PSME3
regulation of ubiquitin-protein ligase activity involved in mitotic cell cycle	1.31608e-21	GO:0051439	35	5.11684	72	PSMD3, PSMB2, PSMD14, PSMD11, PSMB5, PSMA4, BUB3, RPS27A, PSMA7, PSMD8, MAD2L1, CDK2, PSMC3, PSMB4, PSMD7, PSMD10, PSMF1, PSMD13, PSMC5, PSMD1, PSMD2, PSMB7, CDK1, PSMC2, PSMA1, PSMC1, PSMC4, PSMA2, PSMD12, PSMB3, PSMD6, PSMA3, PSMB1, PSMC6, PSME3
negative regulation of ubiquitin protein ligase activity	2.3584e-21	GO:1904667	35	5.18791	73	PSMD3, PSMB2, PSMD14, PSMD11, PSMB5, PSMA4, BUB3, RPS27A, PSMA7, PSMD8, MAD2L1, CDK2, PSMC3, PSMB4, PSMD7, PSMD10, PSMF1, PSMD13, PSMC5, PSMD1, PSMD2, PSMB7, CDK1, PSMC2, PSMA1, PSMC1, PSMC4, PSMA2, PSMD12, PSMB3, PSMD6, PSMA3, PSMB1, PSMC6, PSME3
protein complex subunit organization	3.04034e-21	GO:0071822	213	112.357	1581	SPTBN1, RBMX, SRP54, SPTBN2, IPO5, DECR1, NDUFC2, NAXE, PPP2R1A, YWHAB, TRIM28, CAPZB, IMPDH2, SEC31A, PTPN11, GSPT1, NCLN, PSMD11, EIF4H, ANXA6, DDX3X, HMGB2, SMARCA4, CAB39, VTA1, GFPT1, CCT3, SPAG9, MAPRE1, CPSF7, NUP153, SUPT16H, NPM1, HIST1H4A, NAP1L4, FH, SMARCA5, RBBP7, NDUFA9, SEC13, PFKL, SEPT9, PNPT1, SEC24A, WDR1, AHNAK, SHMT1, ACTR3, HCFC1, HSP90AA1, PSMD8, KPNB1, SEC24C, RAB1B, ACACA…
cellular macromolecule metabolic process	3.52753e-21	GO:0044260	735	579.98	8161	SPTBN1, SSB, RBMX, PARN, ANXA3, RSL1D1, FARSA, SPTBN2, XPO1, EIF2A, HARS, RNASEH2B, TIMM50, YME1L1, DARS2, DNAJA3, TRMT6, RPL13, UBE2M, POP1, RPL13A, TYMS, PSMD3, DDX6, PPP2R1A, CAPN1, RPS14, SLIRP, GNAS, EZR, FUBP3, SNRNP200, YWHAB, HSP90AB1, SEH1L, TRIM28, RPL26, PSMB2, PRMT5, YARS2, PTPN11, CFAP20, SRSF2, GSPT1, USP9X, HNRNPD, SRSF7, SRSF5, PSMD14, RPS6KA3, GSTP1, MSH6, HNRNPH1, RBM4, AARS, PS…
regulation of cellular amino acid metabolic process	6.64622e-21	GO:0006521	30	3.83763	54	PSMD3, PSMB2, PSMD14, PSMD11, PSMB5, PSMA4, PSMA7, PSMD8, PSMC3, PSMB4, PSMD7, PSMD10, PSMF1, PSMD13, PSMC5, PSMD1, PSMD2, PSMB7, PSMC2, PSMA1, PSMC1, PSMC4, PSMA2, PSMD12, PSMB3, PSMD6, PSMA3, PSMB1, PSMC6, PSME3
regulation of ubiquitin protein ligase activity	6.77383e-21	GO:1904666	37	5.96965	84	PSMD3, PSMB2, PSMD14, PSMD11, PSMB5, PSMA4, BUB3, RPS27A, PSMA7, SKP1, PSMD8, MAD2L1, CDK2, PSMC3, PSMB4, PSMD7, PSMD10, PSMF1, PSMD13, PSMC5, PSMD1, PSMD2, PSMB7, CDK1, PSMC2, PSMA1, PSMC1, CUL1, PSMC4, PSMA2, PSMD12, PSMB3, PSMD6, PSMA3, PSMB1, PSMC6, PSME3
generation of precursor metabolites and energy	7.97622e-21	GO:0006091	80	25.2999	356	LDHA, AK2, PDHA1, NDUFC2, GNAS, IDH2, UGP2, ENO1, GFPT1, IDH3B, TPI1, FH, NDUFA9, PFKL, PFKP, RPS27A, CYC1, IDH3A, PYGB, PNPT1, MDH1, ACO2, PKM, GNPDA1, IDH1, PPP1CB, PPP1CA, ETFB, GYS1, DLAT, UQCRC2, COX4I1, NDUFA13, GPI, PRKAG1, NDUFB4, HMGB1, SDHA, HK1, COX6C, DLD, SLC25A13, EIF6, MSH2, ETFA, NDUFA4, PGK1, NDUFS2, ATP5B, NDUFA10, BAX, GALK1, TIGAR, PGM2, SDHB, NDUFV1, PYGL, CYCS, ALDOC, VCP, P…
positive regulation of ubiquitin protein ligase activity	9.39487e-21	GO:1904668	36	5.68538	80	PSMD3, PSMB2, PSMD14, PSMD11, PSMB5, PSMA4, BUB3, RPS27A, PSMA7, SKP1, PSMD8, MAD2L1, PSMC3, PSMB4, PSMD7, PSMD10, PSMF1, PSMD13, PSMC5, PSMD1, PSMD2, PSMB7, CDK1, PSMC2, PSMA1, PSMC1, CUL1, PSMC4, PSMA2, PSMD12, PSMB3, PSMD6, PSMA3, PSMB1, PSMC6, PSME3
antigen processing and presentation of exogenous peptide antigen via MHC class I, TAP-dependent	1.28294e-20	GO:0002479	32	4.47723	63	PSMD3, PSMB2, PSMD14, PSMD11, PSMB5, PSMA4, PSMA7, PSMD8, PSMC3, PSMB4, PSMD7, PSMD10, PSMF1, HLA-C, PSMD13, PSMC5, HLA-B, PSMD1, PSMD2, PSMB7, PSMC2, PSMA1, PSMC1, PSMC4, PSMA2, PSMD12, PSMB3, PSMD6, PSMA3, PSMB1, PSMC6, PSME3
nuclear export	1.84542e-20	GO:0051168	54	12.7921	180	XPO1, SEH1L, PTPN11, SRSF2, SRSF7, SRSF5, AAAS, XPO7, NUP153, NUP133, SRSF6, POLDIP3, CPSF2, U2AF1, THOC2, DDX19B, EIF4A3, RPS15, NUP93, U2AF2, UPF1, SRSF1, NUP98, NUP210, EIF5A, EIF6, RPSA, RAE1, ANP32B, RANBP2, SRSF3, KHDRBS1, NOL6, NUP155, NUP205, SRSF11, NUP107, DDX39B, EMD, RAN, NCBP1, XPO5, NUP160, CHTOP, SRRM1, NUP85, SRSF10, HNRNPA2B1, ALYREF, XPOT, HNRNPA1, RNPS1, SRSF9, RANGAP1
nucleic acid metabolic process	3.48003e-20	GO:0090304	499	355.905	5008	SSB, RBMX, PARN, ANXA3, RSL1D1, FARSA, XPO1, EIF2A, HARS, RNASEH2B, DARS2, DNAJA3, TRMT6, RPL13, POP1, RPL13A, TYMS, DDX6, PPP2R1A, RPS14, SLIRP, GNAS, EZR, FUBP3, SNRNP200, YWHAB, SEH1L, TRIM28, RPL26, PRMT5, YARS2, G3BP1, SRSF2, GSPT1, USP9X, HNRNPD, SRSF7, SRSF5, PSMD14, RPS6KA3, MSH6, HNRNPH1, RBM4, AARS, CNOT9, DDX50, TRIM25, CNOT1, HNRNPDL, AAAS, HUWE1, DDX3X, HMGB2, CSTF1, LRRC47, PSPC1, S…
transport	3.91653e-20	GO:0006810	458	318.879	4487	SPTBN1, SRP54, TIMM44, ANXA3, ARF5, SPTBN2, GAPVD1, IPO5, XPO1, TIMM50, MYO1B, RPL13, RPL13A, RPS14, ATP6V1B2, GNAS, EZR, IPO7, YWHAB, HSP90AB1, SEH1L, GLUD1, TRIM28, RPL26, SLC38A2, TUBA1C, SEC31A, PTPN11, G3BP1, SRSF2, KIF5B, ATP5A1, SRSF7, IPO9, SRSF5, AP3M1, ARF3, CKAP5, RBM4, COPB2, ANXA6, AAAS, HUWE1, ATP5F1, SRP68, DPYSL2, CAB39, RAB10, RPL10, VTA1, HSPH1, PHB2, DNM2, CCT3, SPAG9, RPS24, X…
negative regulation of ubiquitin-protein transferase activity	6.11831e-20	GO:0051444	35	5.61431	79	PSMD3, PSMB2, PSMD14, PSMD11, PSMB5, PSMA4, BUB3, RPS27A, PSMA7, PSMD8, MAD2L1, CDK2, PSMC3, PSMB4, PSMD7, PSMD10, PSMF1, PSMD13, PSMC5, PSMD1, PSMD2, PSMB7, CDK1, PSMC2, PSMA1, PSMC1, PSMC4, PSMA2, PSMD12, PSMB3, PSMD6, PSMA3, PSMB1, PSMC6, PSME3
NIK/NF-kappaB signaling	6.63645e-20	GO:0038061	41	7.74633	109	UBE2M, PSMD3, EZR, PSMB2, PSMD14, PSMD11, PSMB5, PSMA4, RPS27A, PSMA7, SKP1, PSMD8, ACTN4, PSMC3, PSMB4, HMGB1, PSMD7, PSMD10, PSMF1, PSMD13, PSMC5, PSMD1, PSMD2, PSMB7, COPS8, PSMC2, PSMA1, PSMC1, CUL1, CPNE1, PSMC4, PSMA2, PSMD12, EIF2AK2, PSMB3, PSMD6, RPS3, PSMA3, PSMB1, PSMC6, PSME3
antigen processing and presentation of exogenous peptide antigen via MHC class I	7.96411e-20	GO:0042590	32	4.69044	66	PSMD3, PSMB2, PSMD14, PSMD11, PSMB5, PSMA4, PSMA7, PSMD8, PSMC3, PSMB4, PSMD7, PSMD10, PSMF1, HLA-C, PSMD13, PSMC5, HLA-B, PSMD1, PSMD2, PSMB7, PSMC2, PSMA1, PSMC1, PSMC4, PSMA2, PSMD12, PSMB3, PSMD6, PSMA3, PSMB1, PSMC6, PSME3
positive regulation of protein ubiquitination involved in ubiquitin-dependent protein catabolic process	1.90245e-19	GO:2000060	37	6.46712	91	PSMD3, PSMB2, PSMD14, PSMD11, PSMB5, PSMA4, BUB3, RPS27A, PSMA7, SKP1, PSMD8, MAD2L1, PSMC3, PSMB4, PSMD7, PSMD10, PSMF1, CLU, PSMD13, PSMC5, PSMD1, PSMD2, PSMB7, CDK1, PSMC2, PSMA1, PSMC1, CUL1, PSMC4, PSMA2, PSMD12, PSMB3, PSMD6, PSMA3, PSMB1, PSMC6, PSME3
establishment of localization	1.97378e-19	GO:0051234	465	327.691	4611	SPTBN1, SRP54, TIMM44, ANXA3, ARF5, SPTBN2, GAPVD1, IPO5, XPO1, TIMM50, MYO1B, RPL13, RPL13A, RPS14, ATP6V1B2, GNAS, EZR, IPO7, YWHAB, HSP90AB1, SEH1L, GLUD1, TRIM28, RPL26, SLC38A2, TUBA1C, SEC31A, PTPN11, G3BP1, SRSF2, KIF5B, ATP5A1, SRSF7, IPO9, SRSF5, AP3M1, ARF3, CKAP5, RBM4, COPB2, ANXA6, AAAS, HUWE1, ATP5F1, SRP68, DPYSL2, CAB39, RAB10, RPL10, VTA1, HSPH1, PHB2, DNM2, CCT3, SPAG9, RPS24, X…
protein complex biogenesis	2.27018e-19	GO:0070271	186	96.2961	1355	SPTBN1, RBMX, SRP54, SPTBN2, IPO5, DECR1, NDUFC2, NAXE, PPP2R1A, YWHAB, TRIM28, CAPZB, IMPDH2, SEC31A, PTPN11, NCLN, PSMD11, EIF4H, ANXA6, DDX3X, HMGB2, SMARCA4, CAB39, GFPT1, CCT3, SPAG9, MAPRE1, CPSF7, NUP153, NPM1, HIST1H4A, NAP1L4, FH, SMARCA5, RBBP7, NDUFA9, SEC13, PFKL, SEPT9, PNPT1, SEC24A, AHNAK, SHMT1, ACTR3, HCFC1, HSP90AA1, PSMD8, KPNB1, SEC24C, RAB1B, ACACA, RAC1, TMED10, ACTR2, NSF, …
protein complex assembly	2.27018e-19	GO:0006461	186	96.2961	1355	SPTBN1, RBMX, SRP54, SPTBN2, IPO5, DECR1, NDUFC2, NAXE, PPP2R1A, YWHAB, TRIM28, CAPZB, IMPDH2, SEC31A, PTPN11, NCLN, PSMD11, EIF4H, ANXA6, DDX3X, HMGB2, SMARCA4, CAB39, GFPT1, CCT3, SPAG9, MAPRE1, CPSF7, NUP153, NPM1, HIST1H4A, NAP1L4, FH, SMARCA5, RBBP7, NDUFA9, SEC13, PFKL, SEPT9, PNPT1, SEC24A, AHNAK, SHMT1, ACTR3, HCFC1, HSP90AA1, PSMD8, KPNB1, SEC24C, RAB1B, ACACA, RAC1, TMED10, ACTR2, NSF, …
anaphase-promoting complex-dependent catabolic process	2.3707e-19	GO:0031145	34	5.47218	77	PSMD3, PSMB2, PSMD14, PSMD11, PSMB5, PSMA4, BUB3, RPS27A, PSMA7, PSMD8, MAD2L1, PSMC3, PSMB4, PSMD7, PSMD10, PSMF1, PSMD13, PSMC5, PSMD1, PSMD2, PSMB7, CDK1, PSMC2, PSMA1, PSMC1, PSMC4, PSMA2, PSMD12, PSMB3, PSMD6, PSMA3, PSMB1, PSMC6, PSME3
glycosyl compound metabolic process	2.98713e-19	GO:1901657	83	28.4269	400	LDHA, AK2, NDUFC2, TYMS, ATP6V1B2, COASY, IMPDH2, ATP5A1, ATP5F1, PRPS1, ATIC, ENO1, SULT1A1, TPI1, ACOT7, GMPS, ATP6V1A, NDUFA9, PFKL, PFKP, CYC1, ATP5L, ADSS, AKR7A2, PKM, ATP5O, CTPS1, CMPK1, UQCRC2, COX4I1, NDUFA13, GNAI3, GPI, PRKAG1, NDUFB4, DNM1L, HK1, STOML2, COX6C, DLD, SLC25A13, EIF6, AHCY, CAD, MSH2, HSPA1A, ATP5H, NDUFA4, PPAT, PGK1, NDUFS2, ATP5B, NDUFA10, PNP, GALK1, NME3, TIGAR, AT…
nucleoside metabolic process	3.88765e-19	GO:0009116	80	26.8634	378	LDHA, AK2, NDUFC2, TYMS, ATP6V1B2, COASY, IMPDH2, ATP5A1, ATP5F1, PRPS1, ATIC, ENO1, SULT1A1, TPI1, ACOT7, GMPS, ATP6V1A, NDUFA9, PFKL, PFKP, CYC1, ATP5L, ADSS, PKM, ATP5O, CTPS1, CMPK1, UQCRC2, COX4I1, NDUFA13, GNAI3, GPI, PRKAG1, NDUFB4, DNM1L, HK1, STOML2, COX6C, DLD, SLC25A13, EIF6, AHCY, CAD, MSH2, HSPA1A, ATP5H, NDUFA4, PPAT, PGK1, NDUFS2, ATP5B, NDUFA10, PNP, GALK1, NME3, TIGAR, ATP5J2, ND…
ribonucleoside metabolic process	4.83485e-19	GO:0009119	77	25.2999	356	LDHA, AK2, NDUFC2, ATP6V1B2, COASY, IMPDH2, ATP5A1, ATP5F1, PRPS1, ENO1, SULT1A1, TPI1, ACOT7, GMPS, ATP6V1A, NDUFA9, PFKL, PFKP, CYC1, ATP5L, ADSS, PKM, ATP5O, CTPS1, CMPK1, UQCRC2, COX4I1, NDUFA13, GNAI3, GPI, PRKAG1, NDUFB4, DNM1L, HK1, STOML2, COX6C, DLD, SLC25A13, EIF6, AHCY, CAD, MSH2, HSPA1A, ATP5H, NDUFA4, PGK1, NDUFS2, ATP5B, NDUFA10, PNP, GALK1, NME3, TIGAR, ATP5J2, NDUFV1, CYCS, ALDOC,…
purine ribonucleoside metabolic process	6.31754e-19	GO:0046128	73	23.239	327	LDHA, AK2, NDUFC2, ATP6V1B2, COASY, IMPDH2, ATP5A1, ATP5F1, PRPS1, ENO1, SULT1A1, TPI1, ACOT7, GMPS, ATP6V1A, NDUFA9, PFKL, PFKP, CYC1, ATP5L, ADSS, PKM, ATP5O, UQCRC2, COX4I1, NDUFA13, GNAI3, GPI, PRKAG1, NDUFB4, DNM1L, HK1, STOML2, COX6C, DLD, SLC25A13, EIF6, AHCY, MSH2, HSPA1A, ATP5H, NDUFA4, PGK1, NDUFS2, ATP5B, NDUFA10, PNP, GALK1, NME3, TIGAR, ATP5J2, NDUFV1, CYCS, ALDOC, AK1, VCP, DNMT1, P…
tRNA aminoacylation for protein translation	8.07839e-19	GO:0006418	27	3.48229	49	FARSA, HARS, DARS2, YARS2, AARS, LRRC47, PPA2, TARS, AIMP2, IARS2, QARS, CARS, EPRS, WARS, PPA1, NARS, LARS, RARS, AIMP1, MARS, YARS, VARS, IARS, KARS, FARSB, SARS, DARS
purine nucleoside metabolic process	1.08985e-18	GO:0042278	73	23.4522	330	LDHA, AK2, NDUFC2, ATP6V1B2, COASY, IMPDH2, ATP5A1, ATP5F1, PRPS1, ENO1, SULT1A1, TPI1, ACOT7, GMPS, ATP6V1A, NDUFA9, PFKL, PFKP, CYC1, ATP5L, ADSS, PKM, ATP5O, UQCRC2, COX4I1, NDUFA13, GNAI3, GPI, PRKAG1, NDUFB4, DNM1L, HK1, STOML2, COX6C, DLD, SLC25A13, EIF6, AHCY, MSH2, HSPA1A, ATP5H, NDUFA4, PGK1, NDUFS2, ATP5B, NDUFA10, PNP, GALK1, NME3, TIGAR, ATP5J2, NDUFV1, CYCS, ALDOC, AK1, VCP, DNMT1, P…
mRNA export from nucleus	1.32704e-18	GO:0006406	39	7.53312	106	SEH1L, SRSF2, SRSF7, SRSF5, AAAS, NUP153, NUP133, SRSF6, POLDIP3, CPSF2, U2AF1, THOC2, DDX19B, EIF4A3, NUP93, U2AF2, UPF1, SRSF1, NUP98, NUP210, EIF5A, RAE1, RANBP2, SRSF3, NUP155, NUP205, SRSF11, NUP107, DDX39B, NCBP1, NUP160, CHTOP, SRRM1, NUP85, SRSF10, HNRNPA2B1, ALYREF, RNPS1, SRSF9
mRNA-containing ribonucleoprotein complex export from nucleus	1.32704e-18	GO:0071427	39	7.53312	106	SEH1L, SRSF2, SRSF7, SRSF5, AAAS, NUP153, NUP133, SRSF6, POLDIP3, CPSF2, U2AF1, THOC2, DDX19B, EIF4A3, NUP93, U2AF2, UPF1, SRSF1, NUP98, NUP210, EIF5A, RAE1, RANBP2, SRSF3, NUP155, NUP205, SRSF11, NUP107, DDX39B, NCBP1, NUP160, CHTOP, SRRM1, NUP85, SRSF10, HNRNPA2B1, ALYREF, RNPS1, SRSF9
morphogenesis of a polarized epithelium	2.44608e-18	GO:0001738	43	9.23874	130	PSMD3, EZR, PSMB2, PSMD14, PSMD11, PSMB5, RAB10, PSMA4, CLTC, RPS27A, PSMA7, PSMD8, RAC1, PFN1, PSMC3, AP2B1, PSMB4, AP2M1, SEC24B, MSN, PSMD7, PSMD10, PSMF1, AP2A2, PSMD13, PSMC5, PSMD1, PSMD2, AP2A1, PSMB7, PSMC2, PSMA1, PSMC1, PSMC4, PSMA2, PSMD12, PSMB3, PSMD6, PSMA3, PSMB1, PSMC6, PSME3, PAFAH1B1
nucleotide metabolic process	4.05275e-18	GO:0009117	108	44.7723	630	LDHB, LDHA, AK2, PDHA1, RNASEH2B, NDUFC2, TYMS, ATP6V1B2, COASY, IMPDH2, ATP5A1, ATP5F1, PRPS1, ATIC, ENO1, SULT1A1, IDH3B, TPI1, ACOT7, CNP, DHFR, GMPS, ATP6V1A, NDUFA9, PFKL, PFKP, CYC1, GART, ATP5L, SHMT1, MDH1, ADSS, PGD, PKM, ATP5O, CTPS1, IDH1, PGLS, CMPK1, UQCRC2, PRPSAP2, COX4I1, NDUFA13, GNAI3, GPI, CAP1, PRKAG1, RRM1, NDUFB4, DNM1L, HK1, ADNP, STOML2, COX6C, DLD, SLC25A13, EIF6, G6PD, C…
regulation of protein ubiquitination involved in ubiquitin-dependent protein catabolic process	5.5218e-18	GO:2000058	37	7.03565	99	PSMD3, PSMB2, PSMD14, PSMD11, PSMB5, PSMA4, BUB3, RPS27A, PSMA7, SKP1, PSMD8, MAD2L1, PSMC3, PSMB4, PSMD7, PSMD10, PSMF1, CLU, PSMD13, PSMC5, PSMD1, PSMD2, PSMB7, CDK1, PSMC2, PSMA1, PSMC1, CUL1, PSMC4, PSMA2, PSMD12, PSMB3, PSMD6, PSMA3, PSMB1, PSMC6, PSME3
regulation of establishment of planar polarity	5.97077e-18	GO:0090175	39	7.81739	110	PSMD3, PSMB2, PSMD14, PSMD11, PSMB5, PSMA4, CLTC, RPS27A, PSMA7, PSMD8, RAC1, PFN1, PSMC3, AP2B1, PSMB4, AP2M1, SEC24B, PSMD7, PSMD10, PSMF1, AP2A2, PSMD13, PSMC5, PSMD1, PSMD2, AP2A1, PSMB7, PSMC2, PSMA1, PSMC1, PSMC4, PSMA2, PSMD12, PSMB3, PSMD6, PSMA3, PSMB1, PSMC6, PSME3
tRNA aminoacylation	6.30357e-18	GO:0043039	27	3.6955	52	FARSA, HARS, DARS2, YARS2, AARS, LRRC47, PPA2, TARS, AIMP2, IARS2, QARS, CARS, EPRS, WARS, PPA1, NARS, LARS, RARS, AIMP1, MARS, YARS, VARS, IARS, KARS, FARSB, SARS, DARS
amino acid activation	6.30357e-18	GO:0043038	27	3.6955	52	FARSA, HARS, DARS2, YARS2, AARS, LRRC47, PPA2, TARS, AIMP2, IARS2, QARS, CARS, EPRS, WARS, PPA1, NARS, LARS, RARS, AIMP1, MARS, YARS, VARS, IARS, KARS, FARSB, SARS, DARS
positive regulation of ubiquitin-protein transferase activity	8.1758e-18	GO:0051443	37	7.10672	100	PSMD3, PSMB2, PSMD14, PSMD11, PSMB5, PSMA4, BUB3, RPS27A, PSMA7, SKP1, PSMD8, MAD2L1, PSMC3, DCUN1D5, PSMB4, PSMD7, PSMD10, PSMF1, PSMD13, PSMC5, PSMD1, PSMD2, PSMB7, CDK1, PSMC2, PSMA1, PSMC1, CUL1, PSMC4, PSMA2, PSMD12, PSMB3, PSMD6, PSMA3, PSMB1, PSMC6, PSME3
establishment of planar polarity	9.92319e-18	GO:0001736	40	8.31486	117	PSMD3, PSMB2, PSMD14, PSMD11, PSMB5, PSMA4, CLTC, RPS27A, PSMA7, PSMD8, RAC1, PFN1, PSMC3, AP2B1, PSMB4, AP2M1, SEC24B, PSMD7, PSMD10, PSMF1, AP2A2, PSMD13, PSMC5, PSMD1, PSMD2, AP2A1, PSMB7, PSMC2, PSMA1, PSMC1, PSMC4, PSMA2, PSMD12, PSMB3, PSMD6, PSMA3, PSMB1, PSMC6, PSME3, PAFAH1B1
nucleoside phosphate metabolic process	1.04277e-17	GO:0006753	108	45.3409	638	LDHB, LDHA, AK2, PDHA1, RNASEH2B, NDUFC2, TYMS, ATP6V1B2, COASY, IMPDH2, ATP5A1, ATP5F1, PRPS1, ATIC, ENO1, SULT1A1, IDH3B, TPI1, ACOT7, CNP, DHFR, GMPS, ATP6V1A, NDUFA9, PFKL, PFKP, CYC1, GART, ATP5L, SHMT1, MDH1, ADSS, PGD, PKM, ATP5O, CTPS1, IDH1, PGLS, CMPK1, UQCRC2, PRPSAP2, COX4I1, NDUFA13, GNAI3, GPI, CAP1, PRKAG1, RRM1, NDUFB4, DNM1L, HK1, ADNP, STOML2, COX6C, DLD, SLC25A13, EIF6, G6PD, C…
ribonucleoside triphosphate metabolic process	1.29369e-17	GO:0009199	60	17.5536	247	LDHA, AK2, NDUFC2, ATP6V1B2, ATP5A1, ATP5F1, ENO1, TPI1, ATP6V1A, NDUFA9, PFKL, PFKP, CYC1, ATP5L, PKM, ATP5O, CTPS1, UQCRC2, COX4I1, NDUFA13, GNAI3, GPI, PRKAG1, NDUFB4, DNM1L, HK1, STOML2, COX6C, DLD, SLC25A13, EIF6, CAD, MSH2, HSPA1A, ATP5H, NDUFA4, PGK1, NDUFS2, ATP5B, NDUFA10, GALK1, NME3, TIGAR, ATP5J2, NDUFV1, CYCS, ALDOC, AK1, VCP, PGM1, UQCR10, UQCRC1, UQCRFS1, PMPCB, NDUFS1, ADPGK, OGDH…
establishment of tissue polarity	1.40032e-17	GO:0007164	40	8.38593	118	PSMD3, PSMB2, PSMD14, PSMD11, PSMB5, PSMA4, CLTC, RPS27A, PSMA7, PSMD8, RAC1, PFN1, PSMC3, AP2B1, PSMB4, AP2M1, SEC24B, PSMD7, PSMD10, PSMF1, AP2A2, PSMD13, PSMC5, PSMD1, PSMD2, AP2A1, PSMB7, PSMC2, PSMA1, PSMC1, PSMC4, PSMA2, PSMD12, PSMB3, PSMD6, PSMA3, PSMB1, PSMC6, PSME3, PAFAH1B1
ATP metabolic process	1.64003e-17	GO:0046034	56	15.6348	220	LDHA, AK2, NDUFC2, ATP6V1B2, ATP5A1, ATP5F1, ENO1, TPI1, ATP6V1A, NDUFA9, PFKL, PFKP, CYC1, ATP5L, PKM, ATP5O, UQCRC2, COX4I1, NDUFA13, GPI, PRKAG1, NDUFB4, DNM1L, HK1, STOML2, COX6C, DLD, SLC25A13, EIF6, MSH2, HSPA1A, ATP5H, NDUFA4, PGK1, NDUFS2, ATP5B, NDUFA10, GALK1, TIGAR, ATP5J2, NDUFV1, CYCS, ALDOC, AK1, VCP, PGM1, UQCR10, UQCRC1, UQCRFS1, PMPCB, NDUFS1, ADPGK, OGDH, ATP5C1, ALDOA, OLA1
chromosome organization	1.82776e-17	GO:0051276	159	80.5192	1133	XPO1, PPP2R1A, SEH1L, TRIM28, PRMT5, G3BP1, CKAP5, MSH6, HUWE1, DDX3X, HMGB2, NAA50, SMARCA4, SAFB, PHB2, CCT3, BUB3, SUPT5H, MAPRE1, PDS5A, SUPT16H, NPM1, HIST1H4A, NUP133, NAP1L4, SMARCA5, RBBP7, SEC13, SFPQ, MRE11A, RPS27A, SKP1, HCFC1, HIST1H2AG, KPNB1, RPS27, CCT7, MAD2L1, OTUB1, CDK2, GNL3, SRPK1, CUL3, MCM6, HNRNPC, IPO4, MAPK1, FEN1, UPF1, ANXA1, NCAPD2, CSNK2A2, NUP98, PCNA, MCM4, DEK, C…
cytoplasmic translation	2.23693e-17	GO:0002181	27	3.83763	54	SSB, RPL26, GSPT1, RBM4, EIF4H, EEF2, MRTO4, RPL6, RPL9, EIF3B, EIF3A, RPL31, RPLP2, RPL35A, RPL7, PTBP1, RPL8, EIF3D, PCBP2, EIF3M, RPL15, RPL36, MCTS1, RPLP0, YTHDF2, RPL22, EIF3F
Wnt signaling pathway, planar cell polarity pathway	3.06982e-17	GO:0060071	38	7.74633	109	PSMD3, PSMB2, PSMD14, PSMD11, PSMB5, PSMA4, CLTC, RPS27A, PSMA7, PSMD8, RAC1, PFN1, PSMC3, AP2B1, PSMB4, AP2M1, PSMD7, PSMD10, PSMF1, AP2A2, PSMD13, PSMC5, PSMD1, PSMD2, AP2A1, PSMB7, PSMC2, PSMA1, PSMC1, PSMC4, PSMA2, PSMD12, PSMB3, PSMD6, PSMA3, PSMB1, PSMC6, PSME3
regulation of cellular amine metabolic process	3.64044e-17	GO:0033238	31	5.18791	73	PSMD3, PSMB2, PSMD14, PSMD11, PSMB5, PSMA4, PSMA7, PSMD8, PSMC3, PSMB4, PSMD7, PSMD10, PSMF1, PSMD13, PSMC5, PSMD1, PSMD2, PSMB7, PSMC2, PSMA1, PSMC1, PSMC4, PSMA2, HPRT1, PSMD12, PSMB3, PSMD6, PSMA3, PSMB1, PSMC6, PSME3
regulation of mitotic cell cycle phase transition	3.73605e-17	GO:1901990	65	20.5384	289	RNASEH2B, PSMD3, PSMB2, PSMD14, PSMD11, CNOT9, CNOT1, DDX3X, PSMB5, SMARCA4, PHB2, PSMA4, BUB3, NPM1, MRE11A, RPS27A, PSMA7, SKP1, FANCI, PSMD8, MAD2L1, CDK2, SLFN11, CUL3, PSMC3, USP47, ANXA1, CSNK2A2, PCNA, PSMB4, PSMD7, PRKDC, PSMD10, CDK4, PSMF1, CSNK2A1, PSMD13, BAX, PSMC5, RPS27L, PSMD1, PSMD2, RCC2, CDC73, CUL4B, PSMB7, CDK1, PSMC2, PSMA1, PSMC1, CUL1, GIGYF2, PSMC4, PSMA2, DYNC1LI1, PSMD1…
cofactor metabolic process	6.61141e-17	GO:0051186	75	26.2949	370	LDHB, LDHA, PDHA1, TYMS, HSD17B12, COASY, AGK, ATIC, ENO1, IDH3B, TPI1, ACOT7, DHFR, NDUFA9, CIAPIN1, MAT2B, PFKL, PFKP, BLVRA, GART, SHMT1, MDH1, PGD, ACSL3, AKR7A2, PKM, CPOX, ACACA, FASN, IDH1, SLC25A1, NUBP2, DLAT, PGLS, GPI, PRKAG1, ACOT9, ACSL4, HK1, SHMT2, DLD, EIF6, G6PD, AHCY, HSD17B4, ACLY, AASDHPPT, MAT2A, PGK1, MTHFD1, PNP, NAMPT, GALK1, CBR1, TALDO1, TIGAR, PGM2, ALDOC, VCP, DNMT1, P…
nucleobase-containing small molecule metabolic process	6.71416e-17	GO:0055086	112	49.1074	691	LDHB, LDHA, AK2, PDHA1, RNASEH2B, NDUFC2, TYMS, ATP6V1B2, COASY, IMPDH2, ATP5A1, ATP5F1, PRPS1, ATIC, ENO1, SULT1A1, IDH3B, TPI1, ACOT7, CNP, DHFR, GMPS, ATP6V1A, NDUFA9, PFKL, PFKP, CYC1, GART, ATP5L, SHMT1, MDH1, ADSS, PGD, PKM, ATP5O, CTPS1, IDH1, GSR, PGLS, CMPK1, MAPK1, UQCRC2, PRPSAP2, COX4I1, NDUFA13, GNAI3, GPI, CAP1, PRKAG1, RRM1, NDUFB4, DNM1L, HK1, ADNP, STOML2, COX6C, DLD, SLC25A13, E…
macromolecule metabolic process	6.9879e-17	GO:0043170	764	628.163	8839	SPTBN1, SSB, RBMX, PARN, ANXA3, RSL1D1, FARSA, SPTBN2, XPO1, EIF2A, HARS, RNASEH2B, TIMM50, YME1L1, DARS2, DNAJA3, TRMT6, RPL13, UBE2M, POP1, RPL13A, TYMS, PSMD3, DDX6, PPP2R1A, CAPN1, RPS14, SLIRP, GNAS, EZR, FUBP3, SNRNP200, YWHAB, HSP90AB1, SEH1L, TRIM28, RPL26, PSMB2, PRMT5, YARS2, PTPN11, CFAP20, G3BP1, SRSF2, GSPT1, USP9X, HNRNPD, SRSF7, CAPNS1, SRSF5, PSMD14, RPS6KA3, GSTP1, MSH6, HNRNPH1,…
purine ribonucleoside triphosphate metabolic process	7.20275e-17	GO:0009205	58	17.1272	241	LDHA, AK2, NDUFC2, ATP6V1B2, ATP5A1, ATP5F1, ENO1, TPI1, ATP6V1A, NDUFA9, PFKL, PFKP, CYC1, ATP5L, PKM, ATP5O, UQCRC2, COX4I1, NDUFA13, GNAI3, GPI, PRKAG1, NDUFB4, DNM1L, HK1, STOML2, COX6C, DLD, SLC25A13, EIF6, MSH2, HSPA1A, ATP5H, NDUFA4, PGK1, NDUFS2, ATP5B, NDUFA10, GALK1, NME3, TIGAR, ATP5J2, NDUFV1, CYCS, ALDOC, AK1, VCP, PGM1, UQCR10, UQCRC1, UQCRFS1, PMPCB, NDUFS1, ADPGK, OGDH, ATP5C1, AL…
nucleoside triphosphate metabolic process	8.46914e-17	GO:0009141	62	19.2592	271	LDHA, AK2, NDUFC2, TYMS, ATP6V1B2, ATP5A1, ATP5F1, ENO1, TPI1, ATP6V1A, NDUFA9, PFKL, PFKP, CYC1, ATP5L, PKM, ATP5O, CTPS1, CMPK1, UQCRC2, COX4I1, NDUFA13, GNAI3, GPI, PRKAG1, NDUFB4, DNM1L, HK1, STOML2, COX6C, DLD, SLC25A13, EIF6, CAD, MSH2, HSPA1A, ATP5H, NDUFA4, PGK1, NDUFS2, ATP5B, NDUFA10, GALK1, NME3, TIGAR, ATP5J2, NDUFV1, CYCS, ALDOC, AK1, VCP, PGM1, UQCR10, UQCRC1, UQCRFS1, PMPCB, NDUFS1…
regulation of cell cycle phase transition	8.89285e-17	GO:1901987	67	21.9598	309	RNASEH2B, PSMD3, PSMB2, PSMD14, PSMD11, CNOT9, CNOT1, DDX3X, PSMB5, SMARCA4, PHB2, PSMA4, BUB3, NPM1, MRE11A, RPS27A, PSMA7, SKP1, FANCI, PSMD8, MAD2L1, CDK2, SLFN11, CUL3, PSMC3, USP47, CDC5L, ANXA1, CSNK2A2, PCNA, PSMB4, PSMD7, PRKDC, PSMD10, CDK4, PSMF1, CSNK2A1, PSMD13, BAX, PSMC5, RPS27L, PSMD1, PSMD2, RCC2, CDC73, CUL4B, PSMB7, CDK1, PSMC2, PSMA1, PSMC1, CUL1, GIGYF2, PSMC4, PSMA2, DYNC1LI1…
coenzyme metabolic process	9.97898e-17	GO:0006732	66	21.4623	302	LDHB, LDHA, PDHA1, TYMS, HSD17B12, COASY, AGK, ATIC, ENO1, IDH3B, TPI1, ACOT7, DHFR, NDUFA9, MAT2B, PFKL, PFKP, GART, SHMT1, MDH1, PGD, ACSL3, PKM, ACACA, FASN, IDH1, SLC25A1, DLAT, PGLS, GPI, PRKAG1, ACOT9, ACSL4, HK1, SHMT2, DLD, EIF6, G6PD, AHCY, HSD17B4, ACLY, AASDHPPT, MAT2A, PGK1, MTHFD1, PNP, NAMPT, GALK1, TALDO1, TIGAR, PGM2, ALDOC, VCP, DNMT1, PGM1, MCCC2, PDK3, MDH2, PDHB, NNT, GGH, ADP…
DNA metabolic process	1.68769e-16	GO:0006259	138	67.4428	949	ANXA3, DNAJA3, TYMS, PPP2R1A, GNAS, TRIM28, PRMT5, PSMD14, MSH6, TRIM25, HUWE1, HMGB2, CCT3, SUPT5H, PDS5A, SUPT16H, NPM1, HIST1H4A, SMARCA5, RBBP7, TSN, SFPQ, MRE11A, RPS27A, FANCI, KPNB1, CCT7, USP10, OTUB1, CDK2, RAC1, GNL3, PFN1, UBE2I, MCM6, HNRNPC, MAPK1, FEN1, UPF1, USP47, CDC5L, ANXA1, NUP98, PCNA, MCM4, DEK, UBE2V1, CCT6A, PHB, RFC5, AIFM1, RRM1, HMGB1, RUVBL1, MCM5, SMC1A, STOML2, USP7,…
termination of RNA polymerase II transcription	1.71759e-16	GO:0006369	28	4.40617	62	SRSF2, SRSF7, SRSF5, CSTF1, CPSF7, SRSF6, POLDIP3, CPSF2, U2AF1, THOC2, EIF4A3, U2AF2, SRSF1, SNRPB, SNRPD3, SNRPE, SRSF3, SRSF11, CSTF3, DDX39B, NCBP1, SNRPF, CHTOP, SRRM1, ALYREF, SETX, RNPS1, SRSF9
regulation of ubiquitin-protein transferase activity	2.40009e-16	GO:0051438	38	8.17273	115	PSMD3, PSMB2, PSMD14, PSMD11, PSMB5, PSMA4, BUB3, RPS27A, PSMA7, SKP1, PSMD8, MAD2L1, CDK2, PSMC3, DCUN1D5, PSMB4, PSMD7, PSMD10, PSMF1, PSMD13, PSMC5, PSMD1, PSMD2, PSMB7, CDK1, PSMC2, PSMA1, PSMC1, CUL1, PSMC4, PSMA2, PSMD12, PSMB3, PSMD6, PSMA3, PSMB1, PSMC6, PSME3
ribosome assembly	2.8958e-16	GO:0042255	26	3.83763	54	EIF2A, RPS14, DDX3X, RPL10, RPL23A, NPM1, RPL24, RPL5, RPS27, MRTO4, RPL12, RPL6, RPL38, BRIX1, RPS15, DHX30, RPL11, EIF6, RPSA, RPS10, RPL3, RPS27L, RPS19, C1QBP, RPS5, RPS17
purine nucleoside triphosphate metabolic process	2.9361e-16	GO:0009144	58	17.6247	248	LDHA, AK2, NDUFC2, ATP6V1B2, ATP5A1, ATP5F1, ENO1, TPI1, ATP6V1A, NDUFA9, PFKL, PFKP, CYC1, ATP5L, PKM, ATP5O, UQCRC2, COX4I1, NDUFA13, GNAI3, GPI, PRKAG1, NDUFB4, DNM1L, HK1, STOML2, COX6C, DLD, SLC25A13, EIF6, MSH2, HSPA1A, ATP5H, NDUFA4, PGK1, NDUFS2, ATP5B, NDUFA10, GALK1, NME3, TIGAR, ATP5J2, NDUFV1, CYCS, ALDOC, AK1, VCP, PGM1, UQCR10, UQCRC1, UQCRFS1, PMPCB, NDUFS1, ADPGK, OGDH, ATP5C1, AL…
negative regulation of protein ubiquitination	3.51014e-16	GO:0031397	40	9.0966	128	PSMD3, PSMB2, PSMD14, PSMD11, PSMB5, PSMA4, BUB3, RPS27A, PSMA7, PSMD8, MAD2L1, OTUB1, CDK2, PSMC3, PSMB4, PSMD7, HSPA1A, PSMD10, PSMF1, PSMD13, PSMC5, PSMD1, PSMD2, PSMB7, CDK1, PSMC2, PSMA1, PSMC1, TRIP12, DNAJA1, PSMC4, PSMA2, PSMD12, PSMB3, PSMD6, RPS3, PSMA3, PSMB1, PSMC6, PSME3
cellular response to stress	3.55088e-16	GO:0033554	220	129.556	1823	RSL1D1, EIF2A, RNASEH2B, EZR, TXNL1, HSP90AB1, SEH1L, TRIM28, SLC38A2, SEC31A, PTPN11, HNRNPD, PSMD14, RPS6KA3, GSTP1, MSH6, RBM4, AARS, CNOT9, TRIM25, CNOT1, AAAS, HUWE1, DDX3X, HMGB2, CAB39, HSPH1, GFPT1, DNM2, SPAG9, NUP153, SUPT16H, CCDC47, NPM1, HIST1H4A, NUP133, DHFR, SMARCA5, RBBP7, SFPQ, HNRNPK, PFKP, MRE11A, RPS27A, SKP1, SSR1, CUL2, PNPT1, HYOU1, DDX5, MYOF, ASS1, MDH1, PDCD6, HSP90AA1,…
cellular process	3.62561e-16	GO:0009987	1142	1073.61	15107	LDHB, SPTBN1, SSB, LDHA, RBMX, SRP54, TIMM44, PARN, ANXA3, AK2, RSL1D1, FARSA, PDHA1, ARF5, SPTBN2, GAPVD1, IPO5, SRM, XPO1, PDLIM5, DECR1, EIF2A, HARS, RNASEH2B, TIMM50, NDUFC2, YME1L1, NDRG3, HADHA, DARS2, NAXE, KRT2, MYO1B, DNAJA3, TRMT6, RPL13, UBE2M, POP1, CLPTM1, RPL13A, TYMS, PSMD3, DDX6, PPP2R1A, CAPN1, RPS14, HSD17B12, SLIRP, ATP6V1B2, GNAS, AGPS, EZR, FUBP3, IPO7, SNRNP200, TXNL1, YWHAB…
protein folding	4.242e-16	GO:0006457	54	15.7059	221	DNAJA3, TXNL1, HSP90AB1, UNC45A, AARS, HSPH1, CCT3, MOGS, HSP90AA1, PDIA6, CCT7, PDIA3, HSPA4L, CSNK2A2, GNAI3, CDC37, CCT6A, TBCE, CHORDC1, EMC1, CCT5, DNAJC7, GANAB, TCP1, HSPA1A, PPIB, FKBP10, RANBP2, VAPA, CSNK2A1, CLU, QSOX2, PTGES3, ERP29, SNRNP70, RUVBL2, CCT4, FKBP8, HSPD1, PPIA, FKBP3, DNAJA1, DNAJC10, TBCA, LMAN1, GNB1, CCT8, ST13, TRAP1, FKBP5, PPIL1, HSP90B1, GNAI2, CCT2
stimulatory C-type lectin receptor signaling pathway	1.9237e-15	GO:0002223	35	7.39099	104	PSMD3, PSMB2, PSMD14, PSMD11, PSMB5, PSMA4, PAK2, RPS27A, PSMA7, SKP1, PSMD8, PSMC3, UBE2V1, PSMB4, PSMD7, PSMD10, PSMF1, PSMD13, PSMC5, PSMD1, PSMD2, PSMB7, PSMC2, PSMA1, PSMC1, CUL1, PSMC4, PSMA2, PSMD12, PSMB3, PSMD6, PSMA3, PSMB1, PSMC6, PSME3
cellular respiration	2.95576e-15	GO:0045333	44	11.4418	161	PDHA1, NDUFC2, IDH2, IDH3B, FH, NDUFA9, CYC1, IDH3A, PNPT1, MDH1, ACO2, IDH1, ETFB, DLAT, UQCRC2, COX4I1, NDUFA13, NDUFB4, SDHA, COX6C, DLD, SLC25A13, ETFA, NDUFA4, NDUFS2, NDUFA10, BAX, SDHB, NDUFV1, CYCS, VCP, MDH2, UQCR10, MYBBP1A, PDHB, UQCRC1, UQCRFS1, NNT, PMPCB, NDUFS1, ACO1, OGDH, TRAP1, CS
macromolecule biosynthetic process	3.06762e-15	GO:0009059	480	357.894	5036	SSB, RBMX, ANXA3, RSL1D1, FARSA, XPO1, EIF2A, HARS, DARS2, DNAJA3, RPL13, RPL13A, TYMS, DDX6, PPP2R1A, RPS14, SLIRP, EZR, FUBP3, YWHAB, SEH1L, TRIM28, RPL26, PRMT5, YARS2, SRSF2, GSPT1, USP9X, HNRNPD, SRSF7, SRSF5, RPS6KA3, GSTP1, RBM4, AARS, EIF4H, UGP2, CNOT9, TRIM25, CNOT1, HNRNPDL, EIF3L, AAAS, DDX3X, HMGB2, CSTF1, LRRC47, PSPC1, SMARCA4, MTDH, RPL10, SAFB, HSPH1, ENO1, EEF1A1, GFPT1, PHB2, D…
innate immune response activating cell surface receptor signaling pathway	3.74876e-15	GO:0002220	35	7.53312	106	PSMD3, PSMB2, PSMD14, PSMD11, PSMB5, PSMA4, PAK2, RPS27A, PSMA7, SKP1, PSMD8, PSMC3, UBE2V1, PSMB4, PSMD7, PSMD10, PSMF1, PSMD13, PSMC5, PSMD1, PSMD2, PSMB7, PSMC2, PSMA1, PSMC1, CUL1, PSMC4, PSMA2, PSMD12, PSMB3, PSMD6, PSMA3, PSMB1, PSMC6, PSME3
negative regulation of protein modification by small protein conjugation or removal	4.70447e-15	GO:1903321	40	9.73621	137	PSMD3, PSMB2, PSMD14, PSMD11, PSMB5, PSMA4, BUB3, RPS27A, PSMA7, PSMD8, MAD2L1, OTUB1, CDK2, PSMC3, PSMB4, PSMD7, HSPA1A, PSMD10, PSMF1, PSMD13, PSMC5, PSMD1, PSMD2, PSMB7, CDK1, PSMC2, PSMA1, PSMC1, TRIP12, DNAJA1, PSMC4, PSMA2, PSMD12, PSMB3, PSMD6, RPS3, PSMA3, PSMB1, PSMC6, PSME3
ribose phosphate metabolic process	5.94283e-15	GO:0019693	89	37.0971	522	LDHA, AK2, RNASEH2B, NDUFC2, ATP6V1B2, COASY, IMPDH2, ATP5A1, ATP5F1, PRPS1, ATIC, ENO1, SULT1A1, TPI1, ACOT7, GMPS, ATP6V1A, NDUFA9, PFKL, PFKP, CYC1, GART, ATP5L, ADSS, PGD, PKM, ATP5O, CTPS1, PGLS, CMPK1, UQCRC2, COX4I1, NDUFA13, GNAI3, GPI, CAP1, PRKAG1, NDUFB4, DNM1L, HK1, ADNP, STOML2, COX6C, DLD, SLC25A13, EIF6, G6PD, CAD, MSH2, HSPA1A, ATP5H, NDUFA4, PPAT, PAICS, PGK1, NDUFS2, ATP5B, NDUF…
energy derivation by oxidation of organic compounds	6.48875e-15	GO:0015980	57	18.2643	257	PDHA1, NDUFC2, GNAS, IDH2, UGP2, GFPT1, IDH3B, FH, NDUFA9, RPS27A, CYC1, IDH3A, PYGB, PNPT1, MDH1, ACO2, IDH1, PPP1CB, PPP1CA, ETFB, GYS1, DLAT, UQCRC2, COX4I1, NDUFA13, NDUFB4, HMGB1, SDHA, COX6C, DLD, SLC25A13, ETFA, NDUFA4, NDUFS2, NDUFA10, BAX, TIGAR, PGM2, SDHB, NDUFV1, PYGL, CYCS, VCP, PGM1, MDH2, UQCR10, MYBBP1A, PDHB, UQCRC1, UQCRFS1, NNT, PMPCB, NDUFS1, ACO1, OGDH, TRAP1, CS
telomere maintenance	6.69046e-15	GO:0000723	39	9.38087	132	CCT3, HIST1H4A, MRE11A, CCT7, GNL3, HNRNPC, MAPK1, FEN1, UPF1, PCNA, CCT6A, RFC5, USP7, RFC2, CCT5, TCP1, PRKDC, HSPA1A, POLA2, RFC3, RPA1, PTGES3, POLD1, NAT10, MAPK3, RAD50, XRCC5, CCT4, POLA1, DKC1, XRCC6, PARP1, CCT8, APEX1, DHX36, HNRNPA1, PRIM2, HNRNPU, CCT2
Fc receptor signaling pathway	7.02956e-15	GO:0038093	50	14.6398	206	PSMD3, HSP90AB1, PSMB2, PSMD14, PSMD11, PSMB5, PSMA4, PAK2, RPS27A, PSMA7, SKP1, ACTR3, HSP90AA1, PSMD8, RAC1, ACTR2, PSMC3, MAPK1, CYFIP2, ARPC4, UBE2V1, PSMB4, ARPC1A, PSMD7, PSMD10, PSMF1, PSMD13, ACTG1, PSMC5, PSMD1, MAPK3, PSMD2, ARPC2, PSMB7, PSMC2, PLCG1, PSMA1, PSMC1, CUL1, PSMC4, PSMA2, PSMD12, PSMB3, PSMD6, PSMA3, ARPC1B, PSMB1, PSMC6, PSME3, ARPC3
tricarboxylic acid cycle	1.25147e-14	GO:0006099	18	1.98988	28	PDHA1, IDH2, IDH3B, FH, IDH3A, MDH1, ACO2, IDH1, DLAT, SDHA, DLD, SDHB, MDH2, PDHB, NNT, ACO1, OGDH, CS
cellular amine metabolic process	1.34833e-14	GO:0044106	35	7.81739	110	SRM, PSMD3, PSMB2, PSMD14, PSMD11, PSMB5, PSMA4, PSMA7, PSMD8, PSMC3, PSMB4, PSMD7, PSMD10, PSMF1, PSMD13, PSMC5, PSMD1, PSMD2, PSMB7, PSMC2, PSMA1, PSMC1, PSMC4, PSMA2, HPRT1, PSMD12, PSMB3, PSMD6, PSMA3, PSMB1, GCDH, PSMC6, PSME3, ALDH7A1, SMS
regulation of translational initiation	1.50615e-14	GO:0006446	30	5.82751	82	RPL13A, RBM4, EIF4H, EIF3L, DDX3X, EIF3G, NPM1, PPP1CA, EIF3B, EIF3E, EIF4G1, EIF3A, EIF5, EIF4A1, YTHDF1, EIF3D, EIF3H, KHDRBS1, EIF3M, EIF3CL, DDX1, EIF4A2, NCBP1, EIF2S1, EIF2AK2, YTHDF2, EIF5B, EIF3I, EIF4G2, EIF3F
spliceosomal complex assembly	2.31711e-14	GO:0000245	24	3.76656	53	SNRNP200, SRSF5, LUC7L2, SRSF6, SF3A3, LUC7L3, SF3B1, SRSF1, PSIP1, SNRPD1, SNRPD3, SF3A2, PRPF6, SNRPE, DDX39B, SF1, DDX23, DDX1, PRPF19, SRSF10, SETX, SRSF9, SNRPD2, SART3
nucleoside monophosphate biosynthetic process	2.64454e-14	GO:0009124	31	6.32498	89	AK2, TYMS, IMPDH2, ATP5A1, ATP5F1, PRPS1, ATIC, GMPS, GART, ATP5L, SHMT1, ADSS, PKM, ATP5O, CMPK1, STOML2, SLC25A13, CAD, ATP5H, PPAT, PAICS, ATP5B, ATP5J2, AK1, VCP, UMPS, APRT, HPRT1, ATP5C1, ADSL, ALDOA
amine metabolic process	3.27355e-14	GO:0009308	36	8.457	119	SRM, PSMD3, PSMB2, PSMD14, PSMD11, PSMB5, PSMA4, SULT1A1, PSMA7, PSMD8, PSMC3, PSMB4, PSMD7, PSMD10, PSMF1, PSMD13, PSMC5, PSMD1, PSMD2, PSMB7, PSMC2, PSMA1, PSMC1, PSMC4, PSMA2, HPRT1, PSMD12, PSMB3, PSMD6, PSMA3, PSMB1, GCDH, PSMC6, PSME3, ALDH7A1, SMS
RNA metabolic process	3.46692e-14	GO:0016070	435	321.011	4517	SSB, RBMX, PARN, ANXA3, RSL1D1, FARSA, XPO1, EIF2A, HARS, RNASEH2B, DARS2, DNAJA3, TRMT6, RPL13, POP1, RPL13A, TYMS, DDX6, PPP2R1A, RPS14, SLIRP, EZR, FUBP3, SNRNP200, YWHAB, SEH1L, TRIM28, RPL26, PRMT5, YARS2, SRSF2, GSPT1, USP9X, HNRNPD, SRSF7, SRSF5, RPS6KA3, HNRNPH1, RBM4, AARS, CNOT9, DDX50, TRIM25, CNOT1, HNRNPDL, AAAS, DDX3X, HMGB2, CSTF1, LRRC47, PSPC1, SMARCA4, MTDH, RPL10, SAFB, HSPH1, …
RNA 3'-end processing	4.5789e-14	GO:0031123	34	7.67526	108	SRSF2, SRSF7, SRSF5, CSTF1, SUPT5H, CPSF7, SRSF6, POLDIP3, PNPT1, EXOSC2, CPSF2, U2AF1, THOC2, PABPC1, EIF4A3, U2AF2, SRSF1, CDK9, RPSA, SRSF3, SRSF11, CSTF3, DDX39B, CDC73, DKC1, NCBP1, CHTOP, SRRM1, SUPV3L1, ALYREF, ELAC2, FBL, RNPS1, SRSF9
localization	4.91377e-14	GO:0051179	518	398.829	5612	SPTBN1, SSB, SRP54, TIMM44, ANXA3, RSL1D1, ARF5, SPTBN2, GAPVD1, IPO5, XPO1, TIMM50, KRT2, MYO1B, DNAJA3, RPL13, RPL13A, RPS14, SLIRP, ATP6V1B2, GNAS, EZR, IPO7, YWHAB, HSP90AB1, SEH1L, GLUD1, TRIM28, RPL26, SLC38A2, TUBA1C, SEC31A, PTPN11, CFAP20, G3BP1, SRSF2, KIF5B, USP9X, ATP5A1, SRSF7, IPO9, SRSF5, AP3M1, ARF3, CKAP5, GSTP1, RBM4, COPB2, ANXA6, AAAS, HUWE1, DDX3X, HMGB2, ATP5F1, SRP68, DPYSL…
cellular macromolecule biosynthetic process	5.00961e-14	GO:0034645	462	346.524	4876	SSB, RBMX, ANXA3, RSL1D1, FARSA, XPO1, EIF2A, HARS, DARS2, DNAJA3, RPL13, RPL13A, TYMS, DDX6, PPP2R1A, RPS14, SLIRP, EZR, FUBP3, YWHAB, TRIM28, RPL26, PRMT5, YARS2, SRSF2, GSPT1, USP9X, HNRNPD, SRSF7, SRSF5, RPS6KA3, RBM4, AARS, EIF4H, UGP2, CNOT9, TRIM25, CNOT1, HNRNPDL, EIF3L, DDX3X, HMGB2, CSTF1, LRRC47, PSPC1, SMARCA4, MTDH, RPL10, SAFB, HSPH1, ENO1, EEF1A1, GFPT1, PHB2, DNM2, GFM1, CCT3, SUP…
single-organism metabolic process	5.96984e-14	GO:0044710	392	283.061	3983	LDHB, SPTBN1, LDHA, AK2, FARSA, PDHA1, SPTBN2, DECR1, HARS, RNASEH2B, NDUFC2, HADHA, DARS2, NAXE, TYMS, PSMD3, PPP2R1A, HSD17B12, ATP6V1B2, GNAS, AGPS, EZR, TXNL1, YWHAB, COASY, GLUD1, TRIM28, IDH2, PSMB2, PRMT5, YARS2, IMPDH2, PTPN11, ATP5A1, PSMD14, ARF3, GSTP1, MSH6, RBM4, AARS, PSMD11, UGP2, TRIM25, ATP5F1, PSMB5, LRRC47, AGK, VAT1, PRPS1, CAB39, ATIC, HSPH1, ENO1, GFPT1, PHB2, PSMA4, SULT1A1…
ribonucleoside monophosphate biosynthetic process	7.94829e-14	GO:0009156	29	5.75644	81	AK2, IMPDH2, ATP5A1, ATP5F1, PRPS1, ATIC, GMPS, GART, ATP5L, ADSS, PKM, ATP5O, CMPK1, STOML2, SLC25A13, CAD, ATP5H, PPAT, PAICS, ATP5B, ATP5J2, AK1, VCP, UMPS, APRT, HPRT1, ATP5C1, ADSL, ALDOA
Fc-epsilon receptor signaling pathway	9.39572e-14	GO:0038095	39	10.0915	142	PSMD3, PSMB2, PSMD14, PSMD11, PSMB5, PSMA4, PAK2, RPS27A, PSMA7, SKP1, PSMD8, RAC1, PSMC3, MAPK1, UBE2V1, PSMB4, PSMD7, PSMD10, PSMF1, PSMD13, PSMC5, PSMD1, MAPK3, PSMD2, PSMB7, PSMC2, PLCG1, PSMA1, PSMC1, CUL1, PSMC4, PSMA2, PSMD12, PSMB3, PSMD6, PSMA3, PSMB1, PSMC6, PSME3
nicotinamide nucleotide metabolic process	1.011e-13	GO:0046496	36	8.74127	123	LDHB, LDHA, PDHA1, ENO1, IDH3B, TPI1, PFKL, PFKP, MDH1, PGD, PKM, IDH1, PGLS, GPI, PRKAG1, HK1, DLD, EIF6, G6PD, PGK1, PNP, NAMPT, GALK1, TALDO1, TIGAR, PGM2, ALDOC, VCP, PGM1, MDH2, PDHB, NNT, ADPGK, OGDH, ALDOA, ME2
pyridine nucleotide metabolic process	1.011e-13	GO:0019362	36	8.74127	123	LDHB, LDHA, PDHA1, ENO1, IDH3B, TPI1, PFKL, PFKP, MDH1, PGD, PKM, IDH1, PGLS, GPI, PRKAG1, HK1, DLD, EIF6, G6PD, PGK1, PNP, NAMPT, GALK1, TALDO1, TIGAR, PGM2, ALDOC, VCP, PGM1, MDH2, PDHB, NNT, ADPGK, OGDH, ALDOA, ME2
positive regulation of canonical Wnt signaling pathway	1.43394e-13	GO:0090263	35	8.38593	118	PSMD3, PSMB2, PSMD14, PSMD11, PSMB5, PSMA4, RPS27A, PSMA7, PSMD8, PSMC3, PSMB4, PSMD7, PSMD10, PSMF1, ILK, PSMD13, PSMC5, PSMD1, PSMD2, VPS35, PSMB7, PSMC2, JUP, PSMA1, PSMC1, PSMC4, PSMA2, CCAR2, PSMD12, PSMB3, PSMD6, PSMA3, PSMB1, PSMC6, PSME3
pyridine-containing compound metabolic process	1.56716e-13	GO:0072524	37	9.3098	131	LDHB, LDHA, PDHA1, NAXE, ENO1, IDH3B, TPI1, PFKL, PFKP, MDH1, PGD, PKM, IDH1, PGLS, GPI, PRKAG1, HK1, DLD, EIF6, G6PD, PGK1, PNP, NAMPT, GALK1, TALDO1, TIGAR, PGM2, ALDOC, VCP, PGM1, MDH2, PDHB, NNT, ADPGK, OGDH, ALDOA, ME2
telomere organization	1.96717e-13	GO:0032200	39	10.3047	145	CCT3, HIST1H4A, MRE11A, CCT7, GNL3, HNRNPC, MAPK1, FEN1, UPF1, PCNA, CCT6A, RFC5, USP7, RFC2, CCT5, TCP1, PRKDC, HSPA1A, POLA2, RFC3, RPA1, PTGES3, POLD1, NAT10, MAPK3, RAD50, XRCC5, CCT4, POLA1, DKC1, XRCC6, PARP1, CCT8, APEX1, DHX36, HNRNPA1, PRIM2, HNRNPU, CCT2
oxidation-reduction process	2.08691e-13	GO:0055114	130	67.7981	954	LDHB, LDHA, PDHA1, DECR1, NDUFC2, HADHA, HSD17B12, GNAS, AGPS, TXNL1, GLUD1, IDH2, IMPDH2, UGP2, VAT1, ENO1, GFPT1, IDH3B, TPI1, CTBP2, DHFR, FH, NDUFA9, SORD, PFKL, PFKP, RPS27A, CYC1, IDH3A, BLVRA, PYGB, PNPT1, GLRX3, MDH1, CYB5R3, PGD, AKR7A2, ACO2, PKM, CPOX, FASN, PDIA3, IDH1, PPP1CB, GSR, PPP1CA, ASPH, ETFB, GYS1, DLAT, UQCRC2, ALDH3A2, COX4I1, NDUFA13, ALDH1B1, GPI, AIFM1, RRM1, NDUFB4, HM…
positive regulation of protein modification by small protein conjugation or removal	2.20676e-13	GO:1903322	45	13.2896	187	PSMD3, PSMB2, PSMD14, PSMD11, PSMB5, PSMA4, BUB3, RPS27A, PSMA7, SKP1, FANCI, PSMD8, MAD2L1, GNL3, UBE2I, PSMC3, AIMP2, DCUN1D5, PSMB4, CDK9, PSMD7, PSMD10, PSMF1, CLU, PSMD13, PSMC5, PSMD1, PSMD2, PSMB7, CDK1, VCP, PSMC2, PSMA1, PSMC1, CUL1, PSMC4, PSMA2, PSMD12, PSMB3, PSMD6, PSMA3, PSMB1, PSMC6, PSME3, SART3
regulation of mitotic cell cycle	2.2673e-13	GO:0007346	78	32.3356	455	RNASEH2B, PSMD3, PSMB2, PRMT5, PTPN11, PSMD14, PSMD11, CNOT9, CNOT1, DDX3X, PSMB5, SMARCA4, PHB2, PSMA4, BUB3, SCRIB, NPM1, MRE11A, RPS27A, PSMA7, SKP1, FANCI, PSMD8, MAD2L1, CDK2, SLFN11, CUL3, PSMC3, USP47, ANXA1, CSNK2A2, PCNA, PSMB4, KIF11, SMC1A, ASNS, CDK9, MSH2, PSMD7, PRKDC, PSMD10, CDK4, PSMF1, CSNK2A1, PSMD13, BAX, PSMC5, RPS27L, PSMD1, PSMD2, RCC2, CDC73, RPS6, CUL4B, PSMB7, CDK1, PSMC…
purine nucleoside monophosphate biosynthetic process	2.55983e-13	GO:0009127	26	4.83257	68	AK2, IMPDH2, ATP5A1, ATP5F1, PRPS1, ATIC, GMPS, GART, ATP5L, ADSS, PKM, ATP5O, STOML2, SLC25A13, ATP5H, PPAT, PAICS, ATP5B, ATP5J2, AK1, VCP, APRT, HPRT1, ATP5C1, ADSL, ALDOA
purine ribonucleoside monophosphate biosynthetic process	2.55983e-13	GO:0009168	26	4.83257	68	AK2, IMPDH2, ATP5A1, ATP5F1, PRPS1, ATIC, GMPS, GART, ATP5L, ADSS, PKM, ATP5O, STOML2, SLC25A13, ATP5H, PPAT, PAICS, ATP5B, ATP5J2, AK1, VCP, APRT, HPRT1, ATP5C1, ADSL, ALDOA
protein ubiquitination involved in ubiquitin-dependent protein catabolic process	2.97321e-13	GO:0042787	47	14.4266	203	PSMD3, PSMB2, PSMD14, PSMD11, TRIM25, HUWE1, PSMB5, PSMA4, BUB3, RPS27A, PSMA7, SKP1, CUL2, HECTD1, PSMD8, MAD2L1, UBR4, CUL3, PSMC3, TCEB1, PSMB4, PSMD7, PSMD10, PSMF1, CLU, PSMD13, PSMC5, PSMD1, PSMD2, CUL4B, PSMB7, CDK1, UBA6, PSMC2, PSMA1, PSMC1, CUL1, TRIP12, PSMC4, PSMA2, PSMD12, PSMB3, PSMD6, PSMA3, PSMB1, PSMC6, PSME3
aerobic respiration	4.2482e-13	GO:0009060	24	4.19297	59	PDHA1, IDH2, IDH3B, FH, IDH3A, MDH1, ACO2, IDH1, DLAT, UQCRC2, SDHA, DLD, SDHB, NDUFV1, VCP, MDH2, UQCR10, PDHB, UQCRC1, NNT, PMPCB, ACO1, OGDH, CS
regulation of mRNA metabolic process	4.681e-13	GO:1903311	34	8.2438	116	RBMX, SRSF2, SRSF7, RBM4, CNOT1, SAFB, SUPT5H, SRSF6, ZC3HAV1, HNRNPK, RBM25, SYNCRIP, PNPT1, DDX5, PABPC1, SRPK1, U2AF2, UPF1, PTBP1, CDK9, HSPA1A, SRSF3, SNRNP70, THRAP3, CDC73, C1QBP, NCBP1, PRPF19, SRSF10, HNRNPL, HNRNPA2B1, RNPS1, SRSF9, HNRNPR
ribonucleotide metabolic process	5.04063e-13	GO:0009259	83	36.0311	507	LDHA, AK2, RNASEH2B, NDUFC2, ATP6V1B2, COASY, IMPDH2, ATP5A1, ATP5F1, PRPS1, ATIC, ENO1, SULT1A1, TPI1, ACOT7, GMPS, ATP6V1A, NDUFA9, PFKL, PFKP, CYC1, GART, ATP5L, ADSS, PKM, ATP5O, CTPS1, CMPK1, UQCRC2, COX4I1, NDUFA13, GNAI3, GPI, CAP1, PRKAG1, NDUFB4, DNM1L, HK1, ADNP, STOML2, COX6C, DLD, SLC25A13, EIF6, CAD, MSH2, HSPA1A, ATP5H, NDUFA4, PPAT, PAICS, PGK1, NDUFS2, ATP5B, NDUFA10, GALK1, RACK1…
oxidoreduction coenzyme metabolic process	5.57047e-13	GO:0006733	37	9.66514	136	LDHB, LDHA, PDHA1, ENO1, IDH3B, TPI1, NDUFA9, PFKL, PFKP, MDH1, PGD, PKM, IDH1, PGLS, GPI, PRKAG1, HK1, DLD, EIF6, G6PD, PGK1, PNP, NAMPT, GALK1, TALDO1, TIGAR, PGM2, ALDOC, VCP, PGM1, MDH2, PDHB, NNT, ADPGK, OGDH, ALDOA, ME2
regulation of cell cycle process	5.75166e-13	GO:0010564	87	38.7316	545	XPO1, RNASEH2B, PSMD3, PPP2R1A, PSMB2, PRMT5, PSMD14, PSMD11, CNOT9, CNOT1, DDX3X, PSMB5, SMARCA4, PHB2, PSMA4, BUB3, NPM1, SFPQ, MRE11A, RPS27A, PSMA7, SKP1, FANCI, PSMD8, MAD2L1, CDK2, SLFN11, CUL3, PSMC3, USP47, CDC5L, ANXA1, CSNK2A2, PCNA, PSMB4, KIF11, SMC1A, CDK9, CHORDC1, MSH2, PSMD7, PRKDC, STAG2, PSMD10, CDK4, PSMF1, CSNK2A1, PSMD13, BAX, PSMC5, RPS27L, PSMD1, RBM14, DDX39B, PSMD2, RCC2,…
mRNA 3'-end processing	8.28884e-13	GO:0031124	28	5.82751	82	SRSF2, SRSF7, SRSF5, CSTF1, SUPT5H, CPSF7, SRSF6, POLDIP3, PNPT1, CPSF2, U2AF1, THOC2, PABPC1, EIF4A3, U2AF2, SRSF1, CDK9, SRSF3, SRSF11, CSTF3, DDX39B, CDC73, NCBP1, CHTOP, SRRM1, ALYREF, RNPS1, SRSF9
multi-organism localization	8.37673e-13	GO:1902579	26	5.04577	71	XPO1, SEH1L, AAAS, NUP153, NUP133, RPS27A, THOC2, KPNB1, NUP93, NUP98, NUP210, KPNA3, TCP1, RAE1, RANBP2, KPNA2, NUP155, NUP205, NUP107, DDX39B, RAN, KPNA1, NUP160, NUP85, ALYREF, KPNA4
multi-organism transport	8.37673e-13	GO:0044766	26	5.04577	71	XPO1, SEH1L, AAAS, NUP153, NUP133, RPS27A, THOC2, KPNB1, NUP93, NUP98, NUP210, KPNA3, TCP1, RAE1, RANBP2, KPNA2, NUP155, NUP205, NUP107, DDX39B, RAN, KPNA1, NUP160, NUP85, ALYREF, KPNA4
cellular response to heat	1.23716e-12	GO:0034605	32	7.60419	107	HSP90AB1, SEH1L, AAAS, HSPH1, NUP153, NUP133, RBBP7, MYOF, PDCD6, HSP90AA1, MAPK1, NUP93, CLPB, NUP98, NUP210, YWHAE, CHORDC1, DNAJC7, HSPA1A, RAE1, RPA1, RANBP2, PTGES3, NUP155, NUP205, NUP107, MAPK3, HDAC2, EIF2S1, NUP160, CCAR2, NUP85
ER to Golgi vesicle-mediated transport	1.25145e-12	GO:0006888	42	12.3657	174	SPTBN1, SPTBN2, SEC31A, COPB2, SEC13, COPB1, COPG2, SEC24A, HYOU1, GOLGB1, SEC24C, RAB1B, TMED10, NSF, CUL3, YKT6, COPE, GOSR2, ARCN1, SEC24B, SEC23A, NRBP1, PPP6R3, DYNC1I2, DYNC1H1, COPG1, SEC23B, VAPA, NAPA, DYNLL1, DCTN1, USO1, PPP6C, SAR1B, DCTN2, RAB1A, COPA, SEC22B, VCP, SPTAN1, LMAN1, ARF4
T cell receptor signaling pathway	1.27871e-12	GO:0050852	41	11.8682	167	PSMD3, EZR, PSMB2, PSMD14, PSMD11, PSMB5, PSMA4, PAK2, RPS27A, PSMA7, SKP1, PSMD8, PSMC3, MAPK1, UBE2V1, PSMB4, STOML2, PSMD7, PSMD10, PSMF1, PSMD13, PSMC5, PSMD1, PSMD2, PSMB7, PSMC2, PLCG1, PSMA1, PSMC1, CUL1, PHPT1, PSMC4, PSMA2, PSMD12, PSMB3, PSMD6, PSMA3, PSMB1, PSMC6, PSME3, CSK
DNA-templated transcription, termination	1.28837e-12	GO:0006353	31	7.17779	101	PRMT5, SRSF2, SRSF7, SRSF5, CSTF1, CPSF7, SRSF6, POLDIP3, CPSF2, U2AF1, THOC2, EIF4A3, U2AF2, SRSF1, SNRPB, SNRPD3, SNRPE, SRSF3, SRSF11, CSTF3, DDX39B, NCBP1, SNRPF, CHTOP, SRRM1, POLR2H, ALYREF, SETX, RNPS1, SRSF9, XRN2
multi-organism intracellular transport	1.4085e-12	GO:1902583	25	4.7615	67	XPO1, SEH1L, AAAS, NUP153, NUP133, RPS27A, THOC2, KPNB1, NUP93, NUP98, NUP210, KPNA3, RAE1, RANBP2, KPNA2, NUP155, NUP205, NUP107, DDX39B, RAN, KPNA1, NUP160, NUP85, ALYREF, KPNA4
intracellular transport of virus	1.4085e-12	GO:0075733	25	4.7615	67	XPO1, SEH1L, AAAS, NUP153, NUP133, RPS27A, THOC2, KPNB1, NUP93, NUP98, NUP210, KPNA3, RAE1, RANBP2, KPNA2, NUP155, NUP205, NUP107, DDX39B, RAN, KPNA1, NUP160, NUP85, ALYREF, KPNA4
multi-organism cellular localization	1.4085e-12	GO:1902581	25	4.7615	67	XPO1, SEH1L, AAAS, NUP153, NUP133, RPS27A, THOC2, KPNB1, NUP93, NUP98, NUP210, KPNA3, RAE1, RANBP2, KPNA2, NUP155, NUP205, NUP107, DDX39B, RAN, KPNA1, NUP160, NUP85, ALYREF, KPNA4
formation of translation preinitiation complex	1.5596e-12	GO:0001731	15	1.63455	23	RPL13A, EIF4H, EIF3L, EIF3G, EIF3B, EIF3E, EIF3A, EIF2S3, EIF3D, EIF3H, EIF3M, EIF3CL, MCTS1, EIF3I, EIF3F
ribosomal large subunit biogenesis	1.60572e-12	GO:0042273	23	4.05083	57	RSL1D1, RPL26, RPL10, RPL23A, RPL24, RPL5, MRTO4, RPL12, RPL6, RPL38, BRIX1, RPL35A, RPL7, RPL35, DHX30, RPL11, EIF6, PES1, RPL3, ZNF622, RPL14, RPL7A, RPL10A
non-canonical Wnt signaling pathway	1.97309e-12	GO:0035567	39	11.0154	155	PSMD3, PSMB2, PSMD14, PSMD11, PSMB5, PSMA4, CLTC, RPS27A, PSMA7, PSMD8, RAC1, PFN1, PSMC3, AP2B1, PSMB4, AP2M1, PSMD7, PSMD10, PSMF1, AP2A2, PSMD13, PSMC5, PSMD1, PSMD2, AP2A1, PSMB7, PSMC2, PSMA1, PSMC1, PSMC4, PSMA2, PSMD12, PSMB3, PSMD6, GNB1, PSMA3, PSMB1, PSMC6, PSME3
tRNA metabolic process	2.3015e-12	GO:0006399	42	12.5789	177	SSB, FARSA, HARS, DARS2, TRMT6, POP1, YARS2, AARS, LRRC47, EXOSC2, RTCB, PPA2, C14orf166, TARS, AIMP2, IARS2, QARS, CARS, EPRS, HSD17B10, WARS, PPA1, NARS, NAT10, LARS, RARS, FAM98B, AIMP1, DTD1, NSUN2, MARS, YARS, VARS, IARS, DDX1, IKBKAP, KARS, FARSB, SARS, ELAC2, FBL, DARS
positive regulation of Wnt signaling pathway	3.02249e-12	GO:0030177	38	10.6601	150	PSMD3, PSMB2, PSMD14, PSMD11, PSMB5, SMARCA4, PSMA4, RPS27A, PSMA7, PSMD8, PSMC3, PSMB4, PSMD7, PSMD10, PSMF1, ILK, CSNK2A1, PSMD13, PSMC5, PSMD1, PSMD2, CDC73, VPS35, PSMB7, PSMC2, JUP, PSMA1, PSMC1, PSMC4, PSMA2, CCAR2, PSMD12, PSMB3, PSMD6, PSMA3, PSMB1, PSMC6, PSME3
positive regulation of catabolic process	3.07679e-12	GO:0009896	60	22.7415	320	PSMD3, EZR, PSMB2, PSMD14, PSMD11, CNOT1, PSMB5, PSMA4, BUB3, ZC3HAV1, RPS27A, PSMA7, SKP1, PNPT1, PSMD8, MAD2L1, RAB7A, PABPC1, NSF, PSMC3, UPF1, NDUFA13, PSMB4, HMGB1, MSN, CSNK1A1, PSMD7, PSMD10, PSMF1, CSNK2A1, CLU, PSMD13, BAG6, BAX, PSMC5, PSMD1, PSMD2, RACK1, PTPN1, CUL4B, PSMB7, CDK1, SEC22B, VCP, PSMC2, PSMA1, PSMC1, CUL1, PSMC4, PSMA2, PSMD12, PSMB3, PSMD6, SUPV3L1, PSMA3, SPTLC1, PSMB1…
positive regulation of cellular catabolic process	3.26611e-12	GO:0031331	53	18.6907	263	PSMD3, EZR, PSMB2, PSMD14, PSMD11, CNOT1, PSMB5, PSMA4, BUB3, ZC3HAV1, RPS27A, PSMA7, SKP1, PNPT1, PSMD8, MAD2L1, PABPC1, PSMC3, UPF1, PSMB4, HMGB1, MSN, CSNK1A1, PSMD7, PSMD10, PSMF1, CLU, PSMD13, BAX, PSMC5, PSMD1, PSMD2, RACK1, PTPN1, PSMB7, CDK1, VCP, PSMC2, PSMA1, PSMC1, CUL1, PSMC4, PSMA2, PSMD12, PSMB3, PSMD6, SUPV3L1, PSMA3, SPTLC1, PSMB1, PSMC6, PSME3, HNRNPR
regulation of cellular catabolic process	3.72388e-12	GO:0031329	65	25.8685	364	PSMD3, SLIRP, EZR, HSP90AB1, PSMB2, PSMD14, PSMD11, CNOT1, PSMB5, PSMA4, BUB3, ZC3HAV1, RPS27A, PSMA7, SKP1, PNPT1, PSMD8, MAD2L1, PABPC1, IDH1, PPP1CB, PPP1CA, PSMC3, ANXA2, UPF1, PSMB4, AIFM1, HMGB1, MSN, CSNK1A1, PSMD7, PSMD10, PSMF1, CLU, PSMD13, BAG6, BAX, PSMC5, PSMD1, PSMD2, RACK1, PTPN1, TIGAR, LRPPRC, PSMB7, CDK1, VCP, PSMC2, PSMA1, PSMC1, CUL1, PSMC4, PSMA2, CCAR2, SMARCC1, PSMD12, PSMB…
regulation of protein modification by small protein conjugation or removal	3.81192e-12	GO:1903320	53	18.7617	264	PSMD3, HSP90AB1, PSMB2, PSMD14, PSMD11, PSMB5, PSMA4, BUB3, RPS27A, PSMA7, SKP1, HSP90AA1, FANCI, PSMD8, MAD2L1, OTUB1, CDK2, GNL3, UBE2I, PSMC3, AIMP2, DCUN1D5, PSMB4, CDK9, PSMD7, HSPA1A, PSMD10, PSMF1, CLU, PSMD13, PSMC5, PSMD1, PSMD2, PSMB7, CDK1, VCP, PSMC2, PSMA1, PSMC1, CUL1, TRIP12, DNAJA1, PSMC4, PSMA2, PSMD12, PSMB3, PSMD6, RPS3, PSMA3, PSMB1, PSMC6, PSME3, SART3
transport of virus	4.41537e-12	GO:0046794	25	4.9747	70	XPO1, SEH1L, AAAS, NUP153, NUP133, RPS27A, THOC2, KPNB1, NUP93, NUP98, NUP210, KPNA3, RAE1, RANBP2, KPNA2, NUP155, NUP205, NUP107, DDX39B, RAN, KPNA1, NUP160, NUP85, ALYREF, KPNA4
Golgi vesicle transport	4.48036e-12	GO:0048193	58	21.7466	306	SPTBN1, ARF5, SPTBN2, MYO1B, SEC31A, ARF3, COPB2, RAB10, DNM2, SEC13, COPB1, COPG2, SEC24A, HYOU1, GOLGB1, ARL3, SEC24C, RAB1B, ARL1, TMED10, NSF, CUL3, RER1, YKT6, COPE, EXOC2, GOSR2, SCYL1, AP1G1, KIF11, ARCN1, SEC24B, SEC23A, NRBP1, PPP6R3, DYNC1I2, DYNC1H1, COPG1, SEC23B, VAPA, NAPA, DYNLL1, DCTN1, USO1, PPP6C, SURF4, SAR1B, DCTN2, AP2A1, RAB1A, COPA, SEC22B, VCP, SPTAN1, LMAN1, ARF4, RAB6A, …
regulation of cellular response to heat	5.16724e-12	GO:1900034	26	5.40111	76	HSP90AB1, SEH1L, AAAS, HSPH1, NUP153, NUP133, HSP90AA1, MAPK1, NUP93, NUP98, NUP210, YWHAE, CHORDC1, DNAJC7, HSPA1A, RAE1, RPA1, RANBP2, PTGES3, NUP155, NUP205, NUP107, MAPK3, NUP160, CCAR2, NUP85
positive regulation of protein ubiquitination	5.3559e-12	GO:0031398	41	12.3657	174	PSMD3, PSMB2, PSMD14, PSMD11, PSMB5, PSMA4, BUB3, RPS27A, PSMA7, SKP1, FANCI, PSMD8, MAD2L1, PSMC3, AIMP2, DCUN1D5, PSMB4, CDK9, PSMD7, PSMD10, PSMF1, CLU, PSMD13, PSMC5, PSMD1, PSMD2, PSMB7, CDK1, PSMC2, PSMA1, PSMC1, CUL1, PSMC4, PSMA2, PSMD12, PSMB3, PSMD6, PSMA3, PSMB1, PSMC6, PSME3
tRNA export from nucleus	5.47514e-12	GO:0006409	17	2.27415	32	SEH1L, AAAS, NUP153, NUP133, NUP93, NUP98, NUP210, RAE1, RANBP2, NOL6, NUP155, NUP205, NUP107, RAN, NUP160, NUP85, XPOT
tRNA-containing ribonucleoprotein complex export from nucleus	5.47514e-12	GO:0071431	17	2.27415	32	SEH1L, AAAS, NUP153, NUP133, NUP93, NUP98, NUP210, RAE1, RANBP2, NOL6, NUP155, NUP205, NUP107, RAN, NUP160, NUP85, XPOT
tumor necrosis factor-mediated signaling pathway	7.20232e-12	GO:0033209	38	10.9444	154	PSMD3, PSMB2, PSMD14, GSTP1, PSMD11, PSMB5, PSMA4, RPS27A, PSMA7, PSMD8, PSMC3, PSMB4, PSMD7, HSPA1A, PSMD10, PSMF1, KRT18, PSMD13, PSMC5, PSMD1, PSMD2, STAT1, RACK1, KRT8, PSMB7, PSMC2, PSMA1, PSMC1, CPNE1, PSMC4, PSMA2, PSMD12, PSMB3, PSMD6, PSMA3, PSMB1, PSMC6, PSME3
positive regulation of cellular protein catabolic process	7.43004e-12	GO:1903364	42	13.0053	183	PSMD3, EZR, PSMB2, PSMD14, PSMD11, PSMB5, PSMA4, BUB3, RPS27A, PSMA7, SKP1, PSMD8, MAD2L1, PSMC3, PSMB4, MSN, CSNK1A1, PSMD7, PSMD10, PSMF1, CLU, PSMD13, PSMC5, PSMD1, PSMD2, RACK1, PSMB7, CDK1, VCP, PSMC2, PSMA1, PSMC1, CUL1, PSMC4, PSMA2, PSMD12, PSMB3, PSMD6, PSMA3, PSMB1, PSMC6, PSME3
positive regulation of proteolysis involved in cellular protein catabolic process	8.36669e-12	GO:1903052	40	12.0104	169	PSMD3, PSMB2, PSMD14, PSMD11, PSMB5, PSMA4, BUB3, RPS27A, PSMA7, SKP1, PSMD8, MAD2L1, PSMC3, PSMB4, CSNK1A1, PSMD7, PSMD10, PSMF1, CLU, PSMD13, PSMC5, PSMD1, PSMD2, RACK1, PSMB7, CDK1, VCP, PSMC2, PSMA1, PSMC1, CUL1, PSMC4, PSMA2, PSMD12, PSMB3, PSMD6, PSMA3, PSMB1, PSMC6, PSME3
purine nucleotide metabolic process	1.15112e-11	GO:0006163	80	36.1732	509	LDHA, AK2, NDUFC2, ATP6V1B2, COASY, IMPDH2, ATP5A1, ATP5F1, PRPS1, ATIC, ENO1, SULT1A1, TPI1, ACOT7, GMPS, ATP6V1A, NDUFA9, PFKL, PFKP, CYC1, GART, ATP5L, ADSS, PKM, ATP5O, UQCRC2, COX4I1, NDUFA13, GNAI3, GPI, CAP1, PRKAG1, NDUFB4, DNM1L, HK1, ADNP, STOML2, COX6C, DLD, SLC25A13, EIF6, MSH2, HSPA1A, ATP5H, NDUFA4, PPAT, PAICS, PGK1, MTHFD1, NDUFS2, ATP5B, NDUFA10, PNP, GALK1, RACK1, NME3, TIGAR, A…
purine ribonucleotide metabolic process	1.35792e-11	GO:0009150	78	34.9651	492	LDHA, AK2, NDUFC2, ATP6V1B2, COASY, IMPDH2, ATP5A1, ATP5F1, PRPS1, ATIC, ENO1, SULT1A1, TPI1, ACOT7, GMPS, ATP6V1A, NDUFA9, PFKL, PFKP, CYC1, GART, ATP5L, ADSS, PKM, ATP5O, UQCRC2, COX4I1, NDUFA13, GNAI3, GPI, CAP1, PRKAG1, NDUFB4, DNM1L, HK1, ADNP, STOML2, COX6C, DLD, SLC25A13, EIF6, MSH2, HSPA1A, ATP5H, NDUFA4, PPAT, PAICS, PGK1, NDUFS2, ATP5B, NDUFA10, GALK1, RACK1, NME3, TIGAR, ATP5J2, NDUFV1…
purine-containing compound metabolic process	1.38101e-11	GO:0072521	83	38.3052	539	LDHA, AK2, NDUFC2, ATP6V1B2, COASY, IMPDH2, ATP5A1, ATP5F1, PRPS1, ATIC, ENO1, SULT1A1, TPI1, ACOT7, GMPS, ATP6V1A, NDUFA9, PFKL, PFKP, CYC1, GART, ATP5L, SHMT1, ADSS, PKM, ATP5O, UQCRC2, COX4I1, NDUFA13, GNAI3, GPI, CAP1, PRKAG1, NDUFB4, DNM1L, HK1, ADNP, STOML2, COX6C, DLD, SLC25A13, EIF6, AHCY, MSH2, HSPA1A, ATP5H, NDUFA4, PPAT, PAICS, PGK1, MTHFD1, NDUFS2, ATP5B, NDUFA10, PNP, GALK1, RACK1, N…
spliceosomal snRNP assembly	1.61328e-11	GO:0000387	18	2.70055	38	PRMT5, CLNS1A, SART1, PRPF31, SNRPB, SNRPD1, SNRPD3, PRPF6, SNRPE, GEMIN5, WDR77, PRPF8, STRAP, SNRPF, PRPF19, SRSF10, SNRPD2, SART3
regulation of cellular ketone metabolic process	1.69883e-11	GO:0010565	37	10.7311	151	PDHA1, PSMD3, PSMB2, PSMD14, PSMD11, PSMB5, PSMA4, PSMA7, PSMD8, PSMC3, DLAT, ANXA1, PSMB4, DLD, EIF6, PSMD7, PSMD10, PSMF1, PSMD13, PSMC5, PSMD1, PSMD2, PSMB7, PSMC2, PSMA1, PSMC1, PDK3, PSMC4, PSMA2, PDHB, PSMD12, PSMB3, PSMD6, PSMA3, PSMB1, PSMC6, PSME3
tRNA transport	1.96988e-11	GO:0051031	17	2.41629	34	SEH1L, AAAS, NUP153, NUP133, NUP93, NUP98, NUP210, RAE1, RANBP2, NOL6, NUP155, NUP205, NUP107, RAN, NUP160, NUP85, XPOT
regulation of catabolic process	2.33801e-11	GO:0009894	77	34.6808	488	XPO1, PSMD3, SLIRP, EZR, HSP90AB1, PSMB2, PSMD14, PSMD11, CNOT1, PSMB5, PSMA4, BUB3, ZC3HAV1, RPS27A, PSMA7, SKP1, PNPT1, PSMD8, MAD2L1, RAB7A, PABPC1, IDH1, PPP1CB, NSF, PPP1CA, PSMC3, ANXA2, UPF1, NDUFA13, PSMB4, PHB, AIFM1, PRKAG1, HMGB1, MSN, EIF6, CSNK1A1, PSMD7, PSMD10, PSMF1, SF3B3, CSNK2A1, CLU, PSMD13, BAG6, BAX, PSMC5, PSMD1, PSMD2, RACK1, PTPN1, TIGAR, LRPPRC, CUL4B, FLNA, PSMB7, CDK1,…
regulation of protein ubiquitination	2.46279e-11	GO:0031396	49	17.3404	244	PSMD3, HSP90AB1, PSMB2, PSMD14, PSMD11, PSMB5, PSMA4, BUB3, RPS27A, PSMA7, SKP1, HSP90AA1, FANCI, PSMD8, MAD2L1, OTUB1, CDK2, PSMC3, AIMP2, DCUN1D5, PSMB4, CDK9, PSMD7, HSPA1A, PSMD10, PSMF1, CLU, PSMD13, PSMC5, PSMD1, PSMD2, PSMB7, CDK1, PSMC2, PSMA1, PSMC1, CUL1, TRIP12, DNAJA1, PSMC4, PSMA2, PSMD12, PSMB3, PSMD6, RPS3, PSMA3, PSMB1, PSMC6, PSME3
DNA geometric change	2.69347e-11	GO:0032392	26	5.75644	81	G3BP1, DDX3X, HMGB2, MRE11A, RPS27A, MCM6, ANXA1, MCM4, CHD4, HMGB1, RUVBL1, MCM5, MCM7, RAD50, XRCC5, RUVBL2, MCM3, CUL4B, XRCC6, DDX1, PARP1, RECQL, MCM2, SUPV3L1, DHX9, SETX
mitochondrion organization	3.21959e-11	GO:0007005	101	51.4527	724	TIMM44, HARS, TIMM50, NDUFC2, YME1L1, DARS2, DNAJA3, SLIRP, YWHAB, YARS2, HUWE1, VAT1, PHB2, GFM1, CLUH, CNP, NDUFA9, PFKP, PNPT1, MDH1, HCFC1, YWHAQ, HSP90AA1, U2AF1, PSMD8, MRPL47, TUFM, PMPCA, PPP2CB, NUP93, U2AF2, CSNK2A2, NDUFA13, SNRPB, MRPS34, CDC37, YWHAE, PHB, SNRPD1, NDUFB4, HSD17B10, SLC25A6, RUVBL1, DNM1L, STOML2, LMNA, MRPS9, NMT1, YWHAG, CISD2, HSPA1A, PSMD10, SLC25A5, TOMM40, DYNLL…
regulation of RNA splicing	4.633e-11	GO:0043484	28	6.75139	95	RBMX, SRSF2, SRSF7, HNRNPH1, RBM4, SRSF6, HNRNPK, RBM25, RPS13, AHNAK, DDX5, SRPK1, U2AF2, RPS26, PTBP1, HNRNPF, HSPA1A, SRSF3, SNRNP70, THRAP3, C1QBP, PRPF19, SRSF10, HNRNPL, HNRNPA2B1, SETX, RNPS1, SRSF9
regulation of mRNA processing	4.89883e-11	GO:0050684	27	6.32498	89	RBMX, SRSF2, SRSF7, RBM4, SAFB, SUPT5H, SRSF6, HNRNPK, RBM25, DDX5, SRPK1, U2AF2, PTBP1, CDK9, HSPA1A, SRSF3, SNRNP70, THRAP3, CDC73, C1QBP, NCBP1, PRPF19, SRSF10, HNRNPL, HNRNPA2B1, RNPS1, SRSF9
positive regulation of protein catabolic process	6.09606e-11	GO:0045732	49	17.7668	250	PSMD3, EZR, PSMB2, PSMD14, PSMD11, PSMB5, PSMA4, BUB3, RPS27A, PSMA7, SKP1, PSMD8, MAD2L1, RAB7A, NSF, PSMC3, NDUFA13, PSMB4, MSN, CSNK1A1, PSMD7, PSMD10, PSMF1, CSNK2A1, CLU, PSMD13, BAG6, PSMC5, PSMD1, PSMD2, RACK1, CUL4B, PSMB7, CDK1, SEC22B, VCP, PSMC2, PSMA1, PSMC1, CUL1, PSMC4, PSMA2, PSMD12, PSMB3, PSMD6, PSMA3, PSMB1, PSMC6, PSME3
regulation of DNA metabolic process	6.89879e-11	GO:0051052	60	24.4471	344	ANXA3, PPP2R1A, TRIM28, PRMT5, MSH6, CCT3, PDS5A, NPM1, MRE11A, CCT7, OTUB1, CDK2, RAC1, GNL3, PFN1, HNRNPC, MAPK1, PCNA, DEK, UBE2V1, CCT6A, RFC5, AIFM1, HMGB1, SMC1A, STOML2, USP7, CDK9, MSH2, RFC2, CCT5, TCP1, STAG2, RFC3, KPNA2, BAX, NAT10, DDX39B, LONP1, MAPK3, RAD50, XRCC5, CCT4, TIGAR, DKC1, CDK1, DNMT1, TRIP12, KPNA1, PARP1, RPS3, CCT8, SMC3, APEX1, RIF1, ALYREF, DHX36, HNRNPA1, HNRNPU, C…
antigen processing and presentation of exogenous peptide antigen via MHC class II	1.14436e-10	GO:0019886	27	6.53818	92	SPTBN2, SEC31A, DNM2, CTSD, SEC13, CLTC, SEC24A, SEC24C, RAB7A, AP2B1, AP1M1, AP2M1, AP1G1, KIF11, AP1B1, SEC24B, SEC23A, DYNC1I2, DYNC1H1, DYNLL1, AP2A2, DCTN1, SAR1B, DCTN2, AP2A1, ACTR1A, KLC2
positive regulation of proteolysis	1.25896e-10	GO:0045862	60	24.8025	349	PSMD3, PSMB2, PSMD14, PSMD11, DDX3X, PSMB5, PSMA4, BUB3, RPS27A, PSMA7, SKP1, PDCD6, PSMD8, MAD2L1, ASPH, PSMC3, CYFIP2, NDUFA13, PSMB4, PHB, AIFM1, HMGB1, MYH9, FN1, PICALM, CSNK1A1, PSMD7, PSMD10, ANP32B, PSMF1, CLU, PSMD13, BAX, PSMC5, RPS27L, PSMD1, PSMD2, RACK1, HSPD1, PSMB7, CYCS, CDK1, VCP, PSMC2, HDAC2, PSMA1, PSMC1, CUL1, PSMC4, PSMA2, PSMD12, PSMB3, PSMD6, RPS3, PSMA3, PSMB1, FAM162A, P…
regulation of cellular protein metabolic process	1.63251e-10	GO:0032268	239	163.028	2294	EIF2A, RPL13A, PSMD3, DDX6, PPP2R1A, RPS14, EZR, YWHAB, HSP90AB1, PSMB2, PRMT5, PTPN11, HNRNPD, PSMD14, RPS6KA3, GSTP1, RBM4, AARS, PSMD11, EIF4H, CNOT9, CNOT1, EIF3L, DDX3X, PSMB5, CAB39, HSPH1, PHB2, PSMA4, SPAG9, BUB3, EIF3G, NPM1, POLDIP3, MRE11A, PAK2, KRT17, RPS27A, PSMA7, SYNCRIP, SKP1, PDCD6, HSP90AA1, FANCI, PSMD8, EEF2, MAD2L1, OTUB1, CDK2, RAC1, PABPC1, GNL3, UCHL1, RPL38, PPP1CA, ASPH…
cellular ketone metabolic process	1.85082e-10	GO:0042180	44	15.4216	217	PDHA1, PSMD3, PSMB2, PSMD14, PSMD11, PSMB5, PSMA4, NDUFA9, PSMA7, AKR7A2, PSMD8, PSMC3, DLAT, ANXA1, GPI, PSMB4, OXCT1, DLD, EIF6, PSMD7, PSMD10, PSMF1, PSMD13, PSMC5, PSMD1, CBR1, PSMD2, GOT2, PSMB7, PSMC2, PSMA1, PSMC1, PDK3, PSMC4, PSMA2, PDHB, PSMD12, AKR1B1, PSMB3, PSMD6, PSMA3, PSMB1, PSMC6, PSME3
DNA duplex unwinding	2.28744e-10	GO:0032508	24	5.40111	76	G3BP1, DDX3X, MRE11A, RPS27A, MCM6, ANXA1, MCM4, CHD4, RUVBL1, MCM5, MCM7, RAD50, XRCC5, RUVBL2, MCM3, CUL4B, XRCC6, DDX1, PARP1, RECQL, MCM2, SUPV3L1, DHX9, SETX
regulation of telomerase RNA localization to Cajal body	2.33639e-10	GO:1904872	11	1.06601	15	CCT3, CCT7, CCT6A, RUVBL1, CCT5, TCP1, RUVBL2, CCT4, DKC1, CCT8, CCT2
positive regulation of telomerase RNA localization to Cajal body	2.33639e-10	GO:1904874	11	1.06601	15	CCT3, CCT7, CCT6A, RUVBL1, CCT5, TCP1, RUVBL2, CCT4, DKC1, CCT8, CCT2
regulation of cellular protein catabolic process	2.39912e-10	GO:1903362	47	17.2693	243	PSMD3, EZR, HSP90AB1, PSMB2, PSMD14, PSMD11, PSMB5, PSMA4, BUB3, RPS27A, PSMA7, SKP1, PSMD8, MAD2L1, PSMC3, ANXA2, PSMB4, MSN, CSNK1A1, PSMD7, PSMD10, PSMF1, CLU, PSMD13, BAG6, PSMC5, PSMD1, PSMD2, RACK1, PSMB7, CDK1, VCP, PSMC2, PSMA1, PSMC1, CUL1, PSMC4, PSMA2, CCAR2, SMARCC1, PSMD12, PSMB3, PSMD6, PSMA3, PSMB1, PSMC6, PSME3
ribonucleoside biosynthetic process	3.20323e-10	GO:0042455	29	7.74633	109	AK2, COASY, IMPDH2, ATP5A1, ATP5F1, PRPS1, ACOT7, GMPS, ATP5L, ADSS, PKM, ATP5O, CTPS1, CMPK1, STOML2, SLC25A13, CAD, ATP5H, ATP5B, NME3, ATP5J2, AK1, VCP, UMPS, APRT, HPRT1, ATP5C1, ADSL, ALDOA
response to heat	3.48738e-10	GO:0009408	36	11.2997	159	DNAJA3, HSP90AB1, SEH1L, AAAS, HSPH1, NUP153, NUP133, RBBP7, MYOF, PDCD6, HSP90AA1, MAPK1, NUP93, CLPB, NUP98, NUP210, PSIP1, YWHAE, CHORDC1, DNAJC7, HSPA1A, RAE1, RPA1, RANBP2, PTGES3, NUP155, NUP205, NUP107, MAPK3, HDAC2, DNMT1, EIF2S1, DNAJA1, NUP160, CCAR2, NUP85
regulation of mRNA splicing, via spliceosome	3.53097e-10	GO:0048024	21	4.26403	60	RBMX, SRSF2, SRSF7, RBM4, SRSF6, HNRNPK, RBM25, DDX5, SRPK1, U2AF2, PTBP1, SRSF3, SNRNP70, THRAP3, C1QBP, PRPF19, SRSF10, HNRNPL, HNRNPA2B1, RNPS1, SRSF9
regulation of telomere maintenance	3.97352e-10	GO:0032204	22	4.69044	66	CCT3, MRE11A, CCT7, GNL3, HNRNPC, MAPK1, CCT6A, USP7, CCT5, TCP1, NAT10, MAPK3, RAD50, XRCC5, CCT4, DKC1, PARP1, CCT8, DHX36, HNRNPA1, HNRNPU, CCT2
viral translation	4.17738e-10	GO:0019081	9	0.710672	10	SSB, EIF3L, EIF3G, EIF3B, EIF3A, PTBP1, EIF3D, PCBP2, EIF3F
antigen processing and presentation of peptide antigen via MHC class II	4.31146e-10	GO:0002495	27	6.89352	97	SPTBN2, SEC31A, DNM2, CTSD, SEC13, CLTC, SEC24A, SEC24C, RAB7A, AP2B1, AP1M1, AP2M1, AP1G1, KIF11, AP1B1, SEC24B, SEC23A, DYNC1I2, DYNC1H1, DYNLL1, AP2A2, DCTN1, SAR1B, DCTN2, AP2A1, ACTR1A, KLC2
negative regulation of transferase activity	4.43141e-10	GO:0051348	58	24.305	342	PSMD3, PPP2R1A, PSMB2, PSMD14, GSTP1, PSMD11, PSMB5, PSMA4, BUB3, NPM1, PAK2, RPS27A, PSMA7, PSMD8, MAD2L1, CDK2, UCHL1, CUL3, PSMC3, GMFB, PSMB4, CORO1C, YWHAG, CHORDC1, PSMD7, PSMD10, PDCD4, PSMF1, RANBP2, ILK, PSMD13, PSMC5, PSMD1, PSMD2, RACK1, PTPN1, PSMB7, CDK1, PSMC2, EIF4A2, GPS1, PSMA1, PSMC1, DNAJA1, PHPT1, PSMC4, PSMA2, PSMD12, PSMB3, PSMD6, PSMA3, PSMB1, ADAR, PSMC6, PRDX3, PSME3, PRK…
regulation of proteolysis involved in cellular protein catabolic process	4.63585e-10	GO:1903050	44	15.848	223	PSMD3, HSP90AB1, PSMB2, PSMD14, PSMD11, PSMB5, PSMA4, BUB3, RPS27A, PSMA7, SKP1, PSMD8, MAD2L1, PSMC3, PSMB4, CSNK1A1, PSMD7, PSMD10, PSMF1, CLU, PSMD13, BAG6, PSMC5, PSMD1, PSMD2, RACK1, PSMB7, CDK1, VCP, PSMC2, PSMA1, PSMC1, CUL1, PSMC4, PSMA2, CCAR2, SMARCC1, PSMD12, PSMB3, PSMD6, PSMA3, PSMB1, PSMC6, PSME3
regulation of protein metabolic process	4.9482e-10	GO:0051246	249	173.475	2441	XPO1, EIF2A, RPL13A, PSMD3, DDX6, PPP2R1A, RPS14, EZR, YWHAB, HSP90AB1, PSMB2, PRMT5, PTPN11, HNRNPD, PSMD14, RPS6KA3, GSTP1, RBM4, AARS, PSMD11, EIF4H, CNOT9, CNOT1, EIF3L, DDX3X, PSMB5, CAB39, HSPH1, PHB2, PSMA4, SPAG9, BUB3, EIF3G, NPM1, POLDIP3, HNRNPK, MRE11A, PAK2, KRT17, RPS27A, PSMA7, SYNCRIP, SKP1, SEC24A, PDCD6, HSP90AA1, FANCI, PSMD8, EEF2, MAD2L1, OTUB1, RAB7A, CDK2, RAC1, TMED10, PAB…
antigen processing and presentation of peptide or polysaccharide antigen via MHC class II	5.55329e-10	GO:0002504	27	6.96459	98	SPTBN2, SEC31A, DNM2, CTSD, SEC13, CLTC, SEC24A, SEC24C, RAB7A, AP2B1, AP1M1, AP2M1, AP1G1, KIF11, AP1B1, SEC24B, SEC23A, DYNC1I2, DYNC1H1, DYNLL1, AP2A2, DCTN1, SAR1B, DCTN2, AP2A1, ACTR1A, KLC2
regulation of protein localization to Cajal body	6.36443e-10	GO:1904869	8	0.568538	8	CCT3, CCT7, CCT6A, CCT5, TCP1, CCT4, CCT8, CCT2
positive regulation of protein localization to Cajal body	6.36443e-10	GO:1904871	8	0.568538	8	CCT3, CCT7, CCT6A, CCT5, TCP1, CCT4, CCT8, CCT2
nucleoside biosynthetic process	6.62999e-10	GO:0009163	30	8.457	119	AK2, TYMS, COASY, IMPDH2, ATP5A1, ATP5F1, PRPS1, ACOT7, GMPS, ATP5L, ADSS, PKM, ATP5O, CTPS1, CMPK1, STOML2, SLC25A13, CAD, ATP5H, ATP5B, NME3, ATP5J2, AK1, VCP, UMPS, APRT, HPRT1, ATP5C1, ADSL, ALDOA
RNA localization to Cajal body	6.99242e-10	GO:0090670	11	1.13708	16	CCT3, CCT7, CCT6A, RUVBL1, CCT5, TCP1, RUVBL2, CCT4, DKC1, CCT8, CCT2
telomerase RNA localization to Cajal body	6.99242e-10	GO:0090671	11	1.13708	16	CCT3, CCT7, CCT6A, RUVBL1, CCT5, TCP1, RUVBL2, CCT4, DKC1, CCT8, CCT2
telomerase RNA localization	6.99242e-10	GO:0090672	11	1.13708	16	CCT3, CCT7, CCT6A, RUVBL1, CCT5, TCP1, RUVBL2, CCT4, DKC1, CCT8, CCT2
NADH metabolic process	7.19059e-10	GO:0006734	16	2.55842	36	ENO1, IDH3B, TPI1, PFKL, PFKP, MDH1, PKM, GPI, HK1, PGK1, TIGAR, ALDOC, VCP, MDH2, OGDH, ALDOA
mitochondrial transport	7.54973e-10	GO:0006839	49	19.046	268	TIMM44, TIMM50, YWHAB, ATP5A1, HUWE1, ATP5F1, CNP, PNPT1, ATP5L, YWHAQ, HSP90AA1, U2AF1, PSMD8, ATP5O, ACACA, PMPCA, U2AF2, CSNK2A2, NDUFA13, YWHAE, SLC25A6, RUVBL1, STOML2, SLC25A13, NMT1, YWHAG, HSPA1A, ATP5H, SLC25A5, TOMM40, DYNLL1, AFG3L2, ATP5B, BAX, NPEPPS, MTCH2, TOMM22, KIF1BP, ACTL6A, TOMM70, ATP5J2, PSMB7, RHOT2, SLC25A10, SLC25A24, SAE1, ATP5C1, ACAA2, TOMM34
NAD metabolic process	8.82049e-10	GO:0019674	20	4.05083	57	LDHB, LDHA, ENO1, IDH3B, TPI1, PFKL, PFKP, MDH1, PKM, GPI, HK1, PGK1, PNP, NAMPT, TIGAR, ALDOC, VCP, MDH2, OGDH, ALDOA
nuclear import	9.5943e-10	GO:0051170	51	20.3963	287	SPTBN1, IPO5, IPO7, HSP90AB1, TRIM28, IPO9, PHB2, NUP153, NUP133, TNPO3, HSP90AA1, KPNB1, KPNA6, PDIA3, IPO4, MAPK1, NUP93, NUP98, SNRPB, SNRPD1, SNRPD3, G3BP2, KPNA3, LMNA, SNRPE, PSMD10, POLA2, RAE1, RANBP2, TNPO1, KPNA2, NUP155, NUP205, NUP107, GEMIN5, MAPK3, EMD, RPL23, RAN, FLNA, CDK1, NOP58, JUP, KPNA1, SNRPF, PARP1, NUP85, HNRNPA1, KPNA4, SNRPD2, IPO8
glycosyl compound biosynthetic process	1.02357e-09	GO:1901659	30	8.59913	121	AK2, TYMS, COASY, IMPDH2, ATP5A1, ATP5F1, PRPS1, ACOT7, GMPS, ATP5L, ADSS, PKM, ATP5O, CTPS1, CMPK1, STOML2, SLC25A13, CAD, ATP5H, ATP5B, NME3, ATP5J2, AK1, VCP, UMPS, APRT, HPRT1, ATP5C1, ADSL, ALDOA
immune response-activating cell surface receptor signaling pathway	1.07878e-09	GO:0002429	55	22.9547	323	PSMD3, EZR, HSP90AB1, PSMB2, PSMD14, PSMD11, PSMB5, PSMA4, PAK2, RPS27A, PSMA7, SKP1, ACTR3, HSP90AA1, PSMD8, RAC1, ACTR2, PSMC3, MAPK1, CYFIP2, ARPC4, UBE2V1, PSMB4, ARPC1A, STOML2, PSMD7, PSMD10, PSMF1, PSMD13, BAX, ACTG1, PSMC5, PSMD1, MAPK3, PSMD2, ARPC2, PSMB7, PSMC2, PLCG1, PSMA1, PSMC1, CUL1, PHPT1, PSMC4, PSMA2, PSMD12, PSMB3, PSMD6, PSMA3, ARPC1B, PSMB1, PSMC6, PSME3, ARPC3, CSK
negative regulation of cellular protein metabolic process	1.13973e-09	GO:0032269	119	68.2956	961	RPL13A, PSMD3, PPP2R1A, EZR, YWHAB, HSP90AB1, PSMB2, HNRNPD, PSMD14, RPS6KA3, GSTP1, RBM4, PSMD11, CNOT9, CNOT1, DDX3X, PSMB5, HSPH1, PSMA4, BUB3, NPM1, PAK2, RPS27A, PSMA7, SYNCRIP, PSMD8, MAD2L1, OTUB1, CDK2, UCHL1, CUL3, PTPA, EIF4A3, PSMC3, ANXA2, EIF3E, UPF1, USP47, EPRS, GPI, GMFB, IGF2BP3, YWHAE, PSMB4, PHB, CORO1C, EIF6, G6PD, PICALM, YWHAG, CHORDC1, SRRT, TIPRL, PSMD7, PRKDC, HSPA1A, PSM…
membrane disassembly	1.18622e-09	GO:0030397	18	3.34016	47	SEH1L, AAAS, NUP153, NUP133, NUP93, NUP98, NUP210, LMNA, RAE1, RANBP2, NUP155, NUP205, NUP107, EMD, CDK1, NUP160, NUP85, PAFAH1B1
nuclear envelope disassembly	1.18622e-09	GO:0051081	18	3.34016	47	SEH1L, AAAS, NUP153, NUP133, NUP93, NUP98, NUP210, LMNA, RAE1, RANBP2, NUP155, NUP205, NUP107, EMD, CDK1, NUP160, NUP85, PAFAH1B1
negative regulation of RNA splicing	1.31821e-09	GO:0033119	13	1.70561	24	RBMX, SRSF7, SRSF6, HNRNPK, RPS13, U2AF2, RPS26, PTBP1, C1QBP, SRSF10, HNRNPA2B1, RNPS1, SRSF9
response to stress	1.59111e-09	GO:0006950	345	260.675	3668	LDHA, ANXA3, RSL1D1, EIF2A, RNASEH2B, DNAJA3, RPL13A, PSMD3, GNAS, EZR, IPO7, TXNL1, HSP90AB1, SEH1L, TRIM28, PSMB2, SLC38A2, CAPZB, SEC31A, PTPN11, HNRNPD, SRSF5, PSMD14, RPS6KA3, GSTP1, MSH6, RBM4, AARS, PSMD11, CNOT9, TRIM25, CNOT1, AAAS, HUWE1, DDX3X, HMGB2, PSMB5, CSRP1, CAB39, HSPH1, GFPT1, PHB2, PSMA4, DNM2, SPAG9, NUP153, SUPT16H, CCDC47, SCRIB, GSS, NPM1, HIST1H4A, NUP133, DHFR, SMARCA5,…
organophosphate metabolic process	1.59515e-09	GO:0019637	127	74.8338	1053	LDHB, LDHA, AK2, PDHA1, RNASEH2B, NDUFC2, HADHA, TYMS, ATP6V1B2, COASY, IMPDH2, PTPN11, ATP5A1, ARF3, UGP2, ATP5F1, PRPS1, ATIC, ENO1, GFPT1, SULT1A1, IDH3B, TPI1, ACOT7, CNP, DHFR, GMPS, ATP6V1A, NDUFA9, SORD, PFKL, PFKP, CYC1, GART, ATP5L, SHMT1, MDH1, ADSS, CPNE3, PGD, PKM, ATP5O, RAC1, CTPS1, IDH1, PGLS, CMPK1, DPM1, UQCRC2, PRPSAP2, COX4I1, NDUFA13, GNAI3, GPI, CAP1, PRKAG1, RRM1, NDUFB4, DN…
regulation of organ morphogenesis	1.63055e-09	GO:2000027	45	17.0561	240	PSMD3, PSMB2, PSMD14, PSMD11, PSMB5, PHB2, PSMA4, SRSF6, CLTC, RPS27A, PSMA7, PSMD8, RAC1, PFN1, PSMC3, AP2B1, PSMB4, AP2M1, SEC24B, PSMD7, PSMD10, PSMF1, AP2A2, PSMD13, BAX, PSMC5, PSMD1, PSMD2, STAT1, AP2A1, PSMB7, POR, PSMC2, PSMA1, PSMC1, PSMC4, PSMA2, PSMD12, PSMB3, PSMD6, PSMA3, PSMB1, CARM1, PSMC6, PSME3
cytoplasmic translational initiation	1.85482e-09	GO:0002183	11	1.20814	17	SSB, RBM4, EIF3B, EIF3A, PTBP1, EIF3D, PCBP2, EIF3M, MCTS1, YTHDF2, EIF3F
negative regulation of canonical Wnt signaling pathway	1.94902e-09	GO:0090090	35	11.4418	161	PSMD3, PSMB2, G3BP1, PSMD14, PSMD11, PSMB5, PSMA4, CTNND1, RPS27A, PSMA7, PSMD8, CUL3, PSMC3, PSMB4, CSNK1A1, PSMD7, PSMD10, PSMF1, PSMD13, PSMC5, PSMD1, PSMD2, PSMB7, PSMC2, PSMA1, PSMC1, PSMC4, PSMA2, PSMD12, PSMB3, PSMD6, PSMA3, PSMB1, PSMC6, PSME3
purine nucleoside biosynthetic process	1.9952e-09	GO:0042451	25	6.39605	90	AK2, COASY, IMPDH2, ATP5A1, ATP5F1, PRPS1, ACOT7, GMPS, ATP5L, ADSS, PKM, ATP5O, STOML2, SLC25A13, ATP5H, ATP5B, NME3, ATP5J2, AK1, VCP, APRT, HPRT1, ATP5C1, ADSL, ALDOA
purine ribonucleoside biosynthetic process	1.9952e-09	GO:0046129	25	6.39605	90	AK2, COASY, IMPDH2, ATP5A1, ATP5F1, PRPS1, ACOT7, GMPS, ATP5L, ADSS, PKM, ATP5O, STOML2, SLC25A13, ATP5H, ATP5B, NME3, ATP5J2, AK1, VCP, APRT, HPRT1, ATP5C1, ADSL, ALDOA
DNA conformation change	2.11331e-09	GO:0071103	49	19.6146	276	G3BP1, DDX3X, HMGB2, NPM1, HIST1H4A, NAP1L4, SMARCA5, RBBP7, MRE11A, RPS27A, SRPK1, MCM6, IPO4, ANXA1, NCAPD2, MCM4, CHD4, HAT1, AIFM1, HMGB1, RUVBL1, SMC2, MCM5, NAP1L1, HIST1H2BK, NCAPG, ANP32B, NAA10, MCM7, RAD50, XRCC5, RUVBL2, MCM3, CUL4B, HIST1H1C, CDK1, XRCC6, HIST1H2BJ, DDX1, TOP1, PARP1, RECQL, MCM2, SUPV3L1, SMC4, DHX9, RBBP4, SETX, SART3
positive regulation of protein localization to chromosome, telomeric region	2.16785e-09	GO:1904816	9	0.781739	11	CCT7, GNL3, CCT6A, CCT5, TCP1, CCT4, DKC1, CCT8, CCT2
cellular response to DNA damage stimulus	2.22005e-09	GO:0006974	100	54.7218	770	RNASEH2B, TRIM28, PTPN11, PSMD14, MSH6, CNOT9, TRIM25, CNOT1, HUWE1, HMGB2, SUPT16H, NPM1, HIST1H4A, SMARCA5, SFPQ, HNRNPK, MRE11A, RPS27A, DDX5, FANCI, USP10, OTUB1, CDK2, UBE2I, MAPK1, FEN1, UPF1, USP47, CDC5L, BCLAF1, PCNA, DEK, UBE2V1, RFC5, HMGB1, RUVBL1, SMC1A, GNL1, USP7, CDK9, TRIP13, MRPS9, MSH2, RFC2, TIPRL, PRKDC, HSPA1A, PSMD10, RFC3, RPA1, CLU, BAG6, BAX, POLD1, MCM7, RPS27L, MYO6, P…
positive regulation of cellular amide metabolic process	2.41435e-09	GO:0034250	28	7.88846	111	HNRNPD, DDX3X, NPM1, POLDIP3, KRT17, SYNCRIP, EEF2, PABPC1, EIF4A3, MAPK1, ELAVL1, RPS4X, EIF5A, EIF6, PICALM, CDK4, YTHDF1, CLU, KHDRBS1, RPS27L, RPS9, DDX39B, MAPK3, C1QBP, RACK1, PAIP1, YTHDF2, LARP1
negative regulation of mRNA metabolic process	2.79623e-09	GO:1903312	15	2.41629	34	RBMX, SRSF7, SUPT5H, SRSF6, HNRNPK, SYNCRIP, PABPC1, U2AF2, PTBP1, CDK9, C1QBP, SRSF10, HNRNPA2B1, RNPS1, SRSF9
RNA secondary structure unwinding	2.92863e-09	GO:0010501	17	3.12696	44	DDX6, DDX50, DDX3X, DDX18, DDX5, DDX17, DDX19B, DDX42, EIF4A3, EIF4A1, DDX21, DDX46, DDX39B, DDX23, DDX1, EIF4A2, DHX36
mitotic nuclear envelope disassembly	2.92863e-09	GO:0007077	17	3.12696	44	SEH1L, AAAS, NUP153, NUP133, NUP93, NUP98, NUP210, LMNA, RAE1, RANBP2, NUP155, NUP205, NUP107, EMD, CDK1, NUP160, NUP85
regulation of cell cycle	3.10217e-09	GO:0051726	115	66.3768	934	XPO1, RNASEH2B, PSMD3, PPP2R1A, PSMB2, PRMT5, PTPN11, SRSF5, PSMD14, PSMD11, CNOT9, CNOT1, DDX3X, PSMB5, SMARCA4, CAB39, PHB2, PSMA4, BUB3, SCRIB, NPM1, SFPQ, MRE11A, RPS27A, PSMA7, SKP1, CUL2, PNPT1, HCFC1, FANCI, PSMD8, SART1, MAD2L1, CDK2, SLFN11, PA2G4, CUL3, PSMC3, USP47, CDC5L, ANXA1, CSNK2A2, PCNA, CDC37, PSMB4, PRKAG1, KIF11, SMC1A, ASNS, CDK9, CHORDC1, MSH2, PES1, PSMD7, PRKDC, STAG2, PS…
RNA stabilization	3.8383e-09	GO:0043489	14	2.13202	30	HNRNPD, SYNCRIP, HNRNPA0, YBX1, PABPC1, HNRNPC, ELAVL1, TARDBP, THRAP3, DKC1, IGF2BP1, PAIP1, DHX9, HNRNPU
DNA repair	3.8616e-09	GO:0006281	73	35.8179	504	TRIM28, PSMD14, MSH6, TRIM25, HUWE1, HMGB2, SUPT16H, NPM1, HIST1H4A, SMARCA5, SFPQ, MRE11A, RPS27A, FANCI, USP10, OTUB1, CDK2, UBE2I, FEN1, UPF1, USP47, CDC5L, PCNA, DEK, UBE2V1, RFC5, HMGB1, RUVBL1, SMC1A, USP7, CDK9, TRIP13, MSH2, RFC2, PRKDC, HSPA1A, RFC3, RPA1, POLD1, RPS27L, PPP5C, ACTL6A, RBM14, RAD50, XRCC5, RUVBL2, SSRP1, POLR2B, TIGAR, CUL4B, POLA1, COPS8, CDK1, COPS6, VCP, XRCC6, DDX1, …
single-organism cellular process	3.93003e-09	GO:0044763	933	848.898	11945	LDHB, SPTBN1, LDHA, RBMX, SRP54, TIMM44, ANXA3, AK2, RSL1D1, FARSA, PDHA1, ARF5, SPTBN2, GAPVD1, XPO1, PDLIM5, DECR1, EIF2A, HARS, RNASEH2B, TIMM50, NDUFC2, NDRG3, HADHA, DARS2, NAXE, KRT2, MYO1B, DNAJA3, RPL13, UBE2M, CLPTM1, RPL13A, TYMS, PSMD3, DDX6, PPP2R1A, CAPN1, RPS14, HSD17B12, SLIRP, ATP6V1B2, GNAS, AGPS, EZR, IPO7, SNRNP200, TXNL1, YWHAB, COASY, HSP90AB1, SEH1L, GLUD1, TRIM28, RPL26, ID…
nucleobase biosynthetic process	4.46225e-09	GO:0046112	11	1.27921	18	PRPS1, GMPS, GART, SHMT1, CMPK1, CAD, PPAT, PAICS, UMPS, APRT, HPRT1
negative regulation of mRNA splicing, via spliceosome	4.46225e-09	GO:0048025	11	1.27921	18	RBMX, SRSF7, SRSF6, HNRNPK, U2AF2, PTBP1, C1QBP, SRSF10, HNRNPA2B1, RNPS1, SRSF9
negative regulation of protein metabolic process	4.77438e-09	GO:0051248	122	72.2754	1017	RPL13A, PSMD3, PPP2R1A, EZR, YWHAB, HSP90AB1, PSMB2, HNRNPD, PSMD14, RPS6KA3, GSTP1, RBM4, PSMD11, CNOT9, CNOT1, DDX3X, PSMB5, HSPH1, PSMA4, BUB3, NPM1, PAK2, RPS27A, PSMA7, SYNCRIP, PSMD8, MAD2L1, OTUB1, CDK2, UCHL1, CUL3, PTPA, EIF4A3, PSMC3, ANXA2, EIF3E, UPF1, USP47, EPRS, GPI, GMFB, IGF2BP3, YWHAE, PSMB4, PHB, CORO1C, EIF6, G6PD, PICALM, YWHAG, CHORDC1, SRRT, TIPRL, PSMD7, PRKDC, HSPA1A, PSM…
negative regulation of translation	4.89061e-09	GO:0017148	31	9.66514	136	RPL13A, HNRNPD, RBM4, CNOT9, CNOT1, DDX3X, SYNCRIP, EIF4A3, EIF3E, UPF1, EPRS, IGF2BP3, EIF6, SRRT, FXR1, FXR2, RACK1, RAN, IGF2BP2, IGF2BP1, EIF2S1, GIGYF2, XPO5, CAPRIN1, EIF2AK2, RPS3, HNRNPA2B1, ADAR, MRPL44, ILF3, HNRNPR
protein localization to nucleoplasm	5.32348e-09	GO:1990173	8	0.639605	9	CCT3, CCT7, CCT6A, CCT5, TCP1, CCT4, CCT8, CCT2
protein localization to Cajal body	5.32348e-09	GO:1904867	8	0.639605	9	CCT3, CCT7, CCT6A, CCT5, TCP1, CCT4, CCT8, CCT2
positive regulation of establishment of protein localization to telomere	5.32348e-09	GO:1904851	8	0.639605	9	CCT7, CCT6A, CCT5, TCP1, CCT4, DKC1, CCT8, CCT2
protein localization to nuclear body	5.32348e-09	GO:1903405	8	0.639605	9	CCT3, CCT7, CCT6A, CCT5, TCP1, CCT4, CCT8, CCT2
respiratory electron transport chain	5.34021e-09	GO:0022904	25	6.68032	94	NDUFC2, NDUFA9, CYC1, ETFB, UQCRC2, COX4I1, NDUFA13, NDUFB4, SDHA, COX6C, DLD, SLC25A13, ETFA, NDUFA4, NDUFS2, NDUFA10, SDHB, NDUFV1, CYCS, UQCR10, MYBBP1A, UQCRC1, UQCRFS1, PMPCB, NDUFS1
negative regulation of cellular amide metabolic process	5.39966e-09	GO:0034249	32	10.2337	144	RPL13A, HNRNPD, RBM4, CNOT9, CNOT1, DDX3X, SYNCRIP, EIF4A3, EIF3E, UPF1, EPRS, IGF2BP3, EIF6, SRRT, FXR1, CLU, FXR2, RACK1, RAN, IGF2BP2, IGF2BP1, EIF2S1, GIGYF2, XPO5, CAPRIN1, EIF2AK2, RPS3, HNRNPA2B1, ADAR, MRPL44, ILF3, HNRNPR
pyruvate metabolic process	5.62511e-09	GO:0006090	26	7.17779	101	LDHB, LDHA, PDHA1, ENO1, TPI1, PFKL, PFKP, BSG, SLC16A1, PKM, DLAT, GPI, PRKAG1, HK1, DLD, EIF6, PGK1, GALK1, TIGAR, ALDOC, PGM1, PDK3, PDHB, ADPGK, OGDH, ALDOA
antigen receptor-mediated signaling pathway	5.68983e-09	GO:0050851	42	15.9191	224	PSMD3, EZR, PSMB2, PSMD14, PSMD11, PSMB5, PSMA4, PAK2, RPS27A, PSMA7, SKP1, PSMD8, PSMC3, MAPK1, UBE2V1, PSMB4, STOML2, PSMD7, PSMD10, PSMF1, PSMD13, BAX, PSMC5, PSMD1, PSMD2, PSMB7, PSMC2, PLCG1, PSMA1, PSMC1, CUL1, PHPT1, PSMC4, PSMA2, PSMD12, PSMB3, PSMD6, PSMA3, PSMB1, PSMC6, PSME3, CSK
protein sumoylation	6.35134e-09	GO:0016925	30	9.23874	130	SEH1L, TRIM28, AAAS, NUP153, UBA2, NUP133, HNRNPK, GNL3, UBE2I, HNRNPC, NUP93, NUP98, PCNA, NUP210, SMC1A, STAG2, RAE1, RPA1, RANBP2, NUP155, NUP205, NUP107, NOP58, TOP1, PARP1, NUP160, SAE1, NUP85, SMC3, RANGAP1
COPII-coated vesicle budding	6.51319e-09	GO:0090114	20	4.47723	63	SEC31A, SEC13, SEC24A, SEC24C, RAB1B, TMED10, NSF, CUL3, GOSR2, SEC24B, SEC23A, PPP6R3, VAPA, NAPA, USO1, PPP6C, SAR1B, RAB1A, SEC22B, LMAN1
cap-independent translational initiation	6.83525e-09	GO:0002190	10	1.06601	15	SSB, RBM4, EIF3B, EIF3A, PTBP1, EIF3D, PCBP2, MCTS1, YTHDF2, EIF3F
regulation of protein catabolic process	6.91864e-09	GO:0042176	57	25.4421	358	XPO1, PSMD3, EZR, HSP90AB1, PSMB2, PSMD14, PSMD11, PSMB5, PSMA4, BUB3, RPS27A, PSMA7, SKP1, PSMD8, MAD2L1, RAB7A, NSF, PSMC3, ANXA2, NDUFA13, PSMB4, PHB, MSN, CSNK1A1, PSMD7, PSMD10, PSMF1, SF3B3, CSNK2A1, CLU, PSMD13, BAG6, PSMC5, PSMD1, PSMD2, RACK1, CUL4B, FLNA, PSMB7, CDK1, SEC22B, VCP, PSMC2, PSMA1, PSMC1, CUL1, PSMC4, PSMA2, CCAR2, SMARCC1, PSMD12, PSMB3, PSMD6, PSMA3, PSMB1, PSMC6, PSME3
chromosome segregation	7.3523e-09	GO:0007059	52	22.244	313	XPO1, PPP2R1A, SEH1L, USP9X, CKAP5, DDX3X, NAA50, PHB2, BUB3, MAPRE1, PDS5A, NUP133, SEC13, SFPQ, MRE11A, ACTR3, KPNB1, RPS27, MAD2L1, ACTR2, SRPK1, CUL3, UBE2I, NCAPD2, CSNK2A2, NUP98, KIF11, SMC2, SMC1A, TRIP13, NTMT1, STAG2, NCAPG, SLC25A5, CLASP1, RANBP2, CSNK2A1, BAG6, NUP107, RCC2, PDCD6IP, TOP1, VPS4A, NUP160, DYNC1LI1, RPS3, NUP85, SMC3, SMC4, MCMBP, PAFAH1B1, RANGAP1
IRES-dependent translational initiation	8.11973e-09	GO:0002192	9	0.852807	12	SSB, RBM4, EIF3B, EIF3A, PTBP1, EIF3D, PCBP2, MCTS1, EIF3F
response to organic substance	8.12918e-09	GO:0010033	271	197.922	2785	LDHA, RBMX, ANXA3, AK2, SPTBN2, IPO5, HADHA, UBE2M, RPL13A, TYMS, PSMD3, PPP2R1A, ATP6V1B2, EZR, HSP90AB1, PSMB2, IMPDH2, SEC31A, PTPN11, USP9X, HNRNPD, SRSF5, PSMD14, RPS6KA3, GSTP1, HNRNPH1, AARS, PSMD11, CNOT9, TRIM25, CNOT1, HMGB2, PSMB5, DPYSL2, SMARCA4, RAB10, MTDH, SAFB, HSPH1, EEF1A1, GFPT1, PHB2, PSMA4, DNM2, SUPT5H, CCDC47, GSS, NPM1, CNP, DHFR, RBBP7, ATP6V1A, BYSL, LEMD3, SORD, ZC3HAV…
positive regulation of translation	8.53625e-09	GO:0045727	25	6.82245	96	HNRNPD, DDX3X, NPM1, POLDIP3, KRT17, SYNCRIP, EEF2, PABPC1, EIF4A3, MAPK1, ELAVL1, RPS4X, EIF5A, EIF6, CDK4, YTHDF1, KHDRBS1, RPS27L, RPS9, DDX39B, MAPK3, C1QBP, PAIP1, YTHDF2, LARP1
electron transport chain	8.53625e-09	GO:0022900	25	6.82245	96	NDUFC2, NDUFA9, CYC1, ETFB, UQCRC2, COX4I1, NDUFA13, NDUFB4, SDHA, COX6C, DLD, SLC25A13, ETFA, NDUFA4, NDUFS2, NDUFA10, SDHB, NDUFV1, CYCS, UQCR10, MYBBP1A, UQCRC1, UQCRFS1, PMPCB, NDUFS1
cellular component disassembly	8.62e-09	GO:0022411	85	45.0566	634	SPTBN1, SPTBN2, CAPN1, SEH1L, CAPZB, KIF5B, GSPT1, CAPNS1, AAAS, HMGB2, SMARCA4, VTA1, NUP153, SUPT16H, NUP133, PFKP, BSG, WDR1, MDH1, U2AF1, KPNB1, MRPL47, PPP1CA, ASPH, TWF1, CAPN2, NUP93, U2AF2, UPF1, CSNK2A2, STK24, NUP98, SNRPB, MRPS34, CDC37, NUP210, ETF1, AIFM1, SNRPD1, HMGB1, RUVBL1, DNM1L, EIF5A, LMNA, FN1, MRPS9, CAPZA2, CSNK1A1, CISD2, CFL1, RAE1, CLASP1, RANBP2, NAPA, MRPS2, BAX, MRPL…
IRES-dependent viral translational initiation	9.00515e-09	GO:0075522	7	0.49747	7	SSB, EIF3B, EIF3A, PTBP1, EIF3D, PCBP2, EIF3F
gene silencing by RNA	9.74356e-09	GO:0031047	33	11.0154	155	SEH1L, RBM4, CNOT9, CNOT1, AAAS, NUP153, HIST1H4A, NUP133, TSN, PABPC1, NUP93, NUP98, NUP210, EIF6, SRRT, RAE1, FXR1, RANBP2, NUP155, NUP205, NUP107, POLR2B, RAN, NCBP1, XPO5, SND1, NUP160, POLR2H, NUP85, HNRNPA2B1, ADAR, MRPL44, IPO8
ribosomal large subunit assembly	1.01851e-08	GO:0000027	12	1.63455	23	RPL10, RPL23A, RPL24, RPL5, MRTO4, RPL12, RPL6, RPL38, BRIX1, DHX30, RPL11, RPL3
vesicle targeting	1.04138e-08	GO:0006903	22	5.47218	77	SEC31A, SCRIB, SEC13, SEC24A, SEC24C, RAB1B, TMED10, NSF, CUL3, YKT6, GOSR2, SEC24B, SEC23A, PPP6R3, CLASP1, NAPA, USO1, PPP6C, SAR1B, RAB1A, SEC22B, LMAN1
single-organism organelle organization	1.11545e-08	GO:1902589	182	121.951	1716	SPTBN1, SPTBN2, XPO1, TIMM50, MYO1B, PPP2R1A, SLIRP, EZR, YWHAB, SEH1L, CAPZB, CNN3, KIF5B, CKAP5, VAT1, NAA50, PHB2, BUB3, MAPRE1, PDS5A, NPM1, NUP133, CNP, SEC13, SFPQ, PFKP, MRE11A, KRT17, SEPT9, TBC1D15, PNPT1, WDR1, SEPT2, ACTR3, MDH1, SLC16A1, YWHAQ, HSP90AA1, ARL3, U2AF1, KPNB1, RPS27, MAD2L1, RAB7A, CDK2, ACTN4, RAC1, ACTR2, VIM, PFN1, CUL3, FLII, YKT6, TWF1, ANXA2, DOCK7, SLK, NUP93, U2A…
negative regulation of macromolecule metabolic process	1.17835e-08	GO:0010605	227	160.257	2255	RBMX, XPO1, RNASEH2B, DNAJA3, RPL13A, PSMD3, PPP2R1A, RPS14, SLIRP, EZR, YWHAB, HSP90AB1, SEH1L, TRIM28, PSMB2, PRMT5, SRSF2, USP9X, HNRNPD, SRSF7, PSMD14, RPS6KA3, GSTP1, MSH6, RBM4, PSMD11, CNOT9, CNOT1, AAAS, DDX3X, HMGB2, PSMB5, PSPC1, SMARCA4, MTDH, HSPH1, ENO1, GFPT1, PHB2, PSMA4, BUB3, SUPT5H, NUP153, PDS5A, NPM1, HIST1H4A, NUP133, CTBP2, SMARCA5, RBBP7, SRSF6, TSN, SFPQ, HNRNPK, MRE11A, P…
regulation of organelle organization	1.40401e-08	GO:0033043	126	76.7526	1080	SPTBN1, SPTBN2, XPO1, EZR, YWHAB, TRIM28, PRMT5, CAPZB, CNOT1, HUWE1, VAT1, PHB2, DNM2, CCT3, BUB3, MAPRE1, NPM1, SFPQ, MRE11A, SEPT9, TBC1D15, WDR1, ATXN2L, ACTR3, YWHAQ, U2AF1, PSMD8, CCT7, MAD2L1, RAB1B, OTUB1, RAB7A, RAC1, ACTR2, GNL3, PFN1, CUL3, TWF1, ANXA2, HNRNPC, MAPK1, CAPN2, U2AF2, ANXA1, MAP4, CSNK2A2, ARPC4, GMFB, CCT6A, YWHAE, ARPC1A, KIF11, CORO1B, RUVBL1, DNM1L, WDR61, STOML2, SEC…
negative regulation of mRNA processing	1.51053e-08	GO:0050686	13	1.98988	28	RBMX, SRSF7, SUPT5H, SRSF6, HNRNPK, U2AF2, PTBP1, CDK9, C1QBP, SRSF10, HNRNPA2B1, RNPS1, SRSF9
vesicle targeting, rough ER to cis-Golgi	1.62758e-08	GO:0048207	19	4.26403	60	SEC31A, SEC13, SEC24A, SEC24C, RAB1B, TMED10, NSF, CUL3, GOSR2, SEC24B, SEC23A, PPP6R3, NAPA, USO1, PPP6C, SAR1B, RAB1A, SEC22B, LMAN1
COPII vesicle coating	1.62758e-08	GO:0048208	19	4.26403	60	SEC31A, SEC13, SEC24A, SEC24C, RAB1B, TMED10, NSF, CUL3, GOSR2, SEC24B, SEC23A, PPP6R3, NAPA, USO1, PPP6C, SAR1B, RAB1A, SEC22B, LMAN1
retrograde vesicle-mediated transport, Golgi to ER	1.75212e-08	GO:0006890	22	5.61431	79	ARF5, ARF3, COPB2, COPB1, COPG2, RAB1B, TMED10, NSF, RER1, COPE, SCYL1, KIF11, ARCN1, COPG1, NAPA, SURF4, RAB1A, COPA, SEC22B, ARF4, RAB6A, KLC2
DNA-dependent DNA replication	1.76121e-08	GO:0006261	29	9.0966	128	DNAJA3, MRE11A, CDK2, MCM6, FEN1, UPF1, PCNA, MCM4, RFC5, MCM5, SMC1A, STOML2, CDK9, RFC2, STAG2, POLA2, RFC3, RPA1, POLD1, MCM7, LONP1, MCM3, POLA1, PARP1, MCM2, SMC3, MCMBP, ALYREF, PRIM2
G1/S transition of mitotic cell cycle	2.02048e-08	GO:0000082	41	15.9901	225	TYMS, GSPT1, CNOT9, CNOT1, DDX3X, SMARCA4, NPM1, DHFR, RPS27A, CUL2, CDK2, SLFN11, CUL3, MCM6, ANXA1, PCNA, MCM4, MCM5, PRKDC, POLA2, CDK4, RPA1, PPAT, BAX, MCM7, RPS27L, PPP6C, MCM3, CDC73, RPS6, CUL4B, POLA1, CDK1, CUL1, GIGYF2, MCM2, APEX1, CARM1, PRIM2, PSME3, PRMT1
cellular protein complex assembly	2.40839e-08	GO:0043623	73	37.3814	526	SPTBN1, SRP54, SPTBN2, IPO5, NDUFC2, CAPZB, PSMD11, EIF4H, MAPRE1, NUP153, NDUFA9, ACTR3, HSP90AA1, PSMD8, KPNB1, RAC1, TMED10, ACTR2, CAND1, PFN1, TWF1, IPO4, NUP93, AP2B1, EXOC2, NDUFA13, NUP98, ARPC4, GMFB, PSMG1, ARPC1A, NDUFB4, CORO1B, DNM1L, SEC24B, TUBGCP2, PICALM, CAPZA2, DIAPH1, TCP1, PSMD10, TMEM33, CLASP1, TNPO1, NAPA, CLU, NDUFS2, PSMD13, TUBG1, NDUFA10, NUP205, NUP107, LONP1, ARPC2, …
cell cycle G1/S phase transition	2.43529e-08	GO:0044843	42	16.7008	235	TYMS, GSPT1, CNOT9, CNOT1, DDX3X, SMARCA4, PHB2, NPM1, DHFR, RPS27A, CUL2, CDK2, SLFN11, CUL3, MCM6, ANXA1, PCNA, MCM4, MCM5, PRKDC, POLA2, CDK4, RPA1, PPAT, BAX, MCM7, RPS27L, PPP6C, MCM3, CDC73, RPS6, CUL4B, POLA1, CDK1, CUL1, GIGYF2, MCM2, APEX1, CARM1, PRIM2, PSME3, PRMT1
regulation of protein localization to chromosome, telomeric region	2.47088e-08	GO:1904814	9	0.923874	13	CCT7, GNL3, CCT6A, CCT5, TCP1, CCT4, DKC1, CCT8, CCT2
regulation of establishment of protein localization to telomere	2.51553e-08	GO:0070203	8	0.710672	10	CCT7, CCT6A, CCT5, TCP1, CCT4, DKC1, CCT8, CCT2
mRNA stabilization	2.55968e-08	GO:0048255	13	2.06095	29	HNRNPD, SYNCRIP, HNRNPA0, YBX1, PABPC1, HNRNPC, ELAVL1, TARDBP, THRAP3, IGF2BP1, PAIP1, DHX9, HNRNPU
protein import	2.73828e-08	GO:0017038	51	22.4572	316	SPTBN1, TIMM44, IPO5, TIMM50, IPO7, HSP90AB1, TRIM28, IPO9, PHB2, NUP133, TNPO3, HSP90AA1, KPNB1, KPNA6, PDIA3, HNRNPM, IPO4, MAPK1, NUP93, NDUFA13, NUP98, G3BP2, KPNA3, LMNA, PSMD10, POLA2, RAE1, RANBP2, TNPO1, TOMM40, CLU, AFG3L2, KPNA2, NUP155, NUP205, TOMM22, NUP107, MAPK3, EMD, RPL23, RAN, FLNA, CDK1, NOP58, JUP, KPNA1, LAMP2, PARP1, NUP85, KPNA4, IPO8
sister chromatid cohesion	2.77159e-08	GO:0007062	28	8.74127	123	XPO1, PPP2R1A, SEH1L, CKAP5, NAA50, PHB2, BUB3, MAPRE1, PDS5A, NUP133, SEC13, SFPQ, MRE11A, RPS27, MAD2L1, NUP98, SMC1A, STAG2, CLASP1, RANBP2, NUP107, RCC2, NUP160, NUP85, SMC3, MCMBP, PAFAH1B1, RANGAP1
positive regulation of DNA metabolic process	2.95985e-08	GO:0051054	36	13.2185	186	ANXA3, TRIM28, MSH6, CCT3, MRE11A, CCT7, CDK2, RAC1, GNL3, PFN1, MAPK1, PCNA, CCT6A, RFC5, HMGB1, STOML2, RFC2, CCT5, TCP1, RFC3, BAX, DDX39B, MAPK3, RAD50, CCT4, TIGAR, DKC1, CDK1, DNMT1, RPS3, CCT8, APEX1, RIF1, DHX36, HNRNPA1, CCT2
vesicle coating	2.97247e-08	GO:0006901	19	4.40617	62	SEC31A, SEC13, SEC24A, SEC24C, RAB1B, TMED10, NSF, CUL3, GOSR2, SEC24B, SEC23A, PPP6R3, NAPA, USO1, PPP6C, SAR1B, RAB1A, SEC22B, LMAN1
anatomical structure homeostasis	3.03011e-08	GO:0060249	55	25.1578	354	GNAS, PTPN11, CCT3, HIST1H4A, FH, MRE11A, CCT7, RAB7A, ACACA, RAC1, GNL3, HNRNPC, MAPK1, FEN1, UPF1, PCNA, CCT6A, RFC5, USP7, RFC2, CCT5, TCP1, PRKDC, HSPA1A, POLA2, RFC3, RPA1, BAX, ACTG1, PTGES3, POLD1, NAT10, MAPK3, RAD50, XRCC5, CCT4, ADD1, POLA1, DKC1, XRCC6, GIGYF2, STRAP, LAMP2, PARP1, AKR1B1, ATP6AP1, CCT8, APEX1, DHX36, HNRNPA1, ALDOA, PRIM2, HNRNPU, CCT2, CSK
regulation of biological quality	3.20354e-08	GO:0065008	315	240.207	3380	SPTBN1, PARN, SPTBN2, XPO1, PDLIM5, DNAJA3, TYMS, PSMD3, RPS14, HSD17B12, ATP6V1B2, GNAS, EZR, TXNL1, YWHAB, HSP90AB1, GLUD1, PSMB2, CAPZB, PTPN11, CFAP20, KIF5B, HNRNPD, PSMD14, GSTP1, NCLN, AARS, PSMD11, ANXA6, HMGB2, PSMB5, DPYSL2, SMARCA4, CSRP1, SAFB, PHB2, PSMA4, SULT1A1, DNM2, CCT3, RPS24, CCDC47, SCRIB, HIST1H4A, CNP, FH, ATP6V1A, ZC3HAV1, HNRNPK, PFKL, MRE11A, RPS27A, CLNS1A, PSMA7, SYNC…
immune response-regulating cell surface receptor signaling pathway	3.34459e-08	GO:0002768	55	25.2289	355	PSMD3, EZR, HSP90AB1, PSMB2, PSMD14, PSMD11, PSMB5, PSMA4, PAK2, RPS27A, PSMA7, SKP1, ACTR3, HSP90AA1, PSMD8, RAC1, ACTR2, PSMC3, MAPK1, CYFIP2, ARPC4, UBE2V1, PSMB4, ARPC1A, STOML2, PSMD7, PSMD10, PSMF1, PSMD13, BAX, ACTG1, PSMC5, PSMD1, MAPK3, PSMD2, ARPC2, PSMB7, PSMC2, PLCG1, PSMA1, PSMC1, CUL1, PHPT1, PSMC4, PSMA2, PSMD12, PSMB3, PSMD6, PSMA3, ARPC1B, PSMB1, PSMC6, PSME3, ARPC3, CSK
translational elongation	3.6498e-08	GO:0006414	29	9.38087	132	AARS, EEF1A1, GFM1, EEF1A2, EEF2, MRPL47, TUFM, EIF4A3, IARS2, MRPS34, RPLP2, EIF5A, EEF1B2, MRPS9, EEF1G, MRPL4, LARS, RPS9, DTD1, RPS5, MRPL45, VARS, IARS, MRPS23, EEF1D, MRPL44, MRPL37, TSFM, MRPL13
sister chromatid segregation	3.89397e-08	GO:0000819	39	15.1373	213	XPO1, PPP2R1A, SEH1L, CKAP5, NAA50, PHB2, BUB3, MAPRE1, PDS5A, NUP133, SEC13, SFPQ, MRE11A, KPNB1, RPS27, MAD2L1, CUL3, NCAPD2, CSNK2A2, NUP98, SMC2, SMC1A, STAG2, NCAPG, CLASP1, RANBP2, CSNK2A1, NUP107, RCC2, PDCD6IP, VPS4A, NUP160, DYNC1LI1, NUP85, SMC3, SMC4, MCMBP, PAFAH1B1, RANGAP1
RNA-dependent DNA biosynthetic process	3.97628e-08	GO:0006278	19	4.47723	63	CCT3, MRE11A, CCT7, HNRNPC, MAPK1, CCT6A, CCT5, TCP1, PTGES3, NAT10, MAPK3, RAD50, CCT4, DKC1, PPIA, CCT8, HNRNPA1, HNRNPU, CCT2
nucleotide phosphorylation	4.90406e-08	GO:0046939	23	6.39605	90	LDHA, AK2, ENO1, TPI1, PFKL, PFKP, PKM, CMPK1, GPI, PRKAG1, HK1, EIF6, PGK1, GALK1, RAD50, NME3, TIGAR, ALDOC, AK1, PGM1, ADPGK, OGDH, ALDOA
regulation of cellular response to stress	5.55861e-08	GO:0080135	75	39.5844	557	RSL1D1, RNASEH2B, EZR, HSP90AB1, SEH1L, TRIM28, GSTP1, AAAS, HSPH1, SPAG9, NUP153, NPM1, NUP133, DHFR, SFPQ, HNRNPK, PNPT1, HYOU1, DDX5, HSP90AA1, OTUB1, MAPK1, NUP93, USP47, BCLAF1, STK24, NUP98, PCNA, NUP210, DEK, UBE2V1, YWHAE, HMGB1, CDK9, CHORDC1, DNAJC7, PRKDC, HSPA1A, PSMD10, HACD3, RAE1, PDCD4, TMEM33, RPA1, RANBP2, CLU, BAG6, ZNF622, BAX, PTGES3, NUP155, ERP29, NUP205, NUP107, DDX39B, MA…
proteasome-mediated ubiquitin-dependent protein catabolic process	5.66718e-08	GO:0043161	54	24.9446	351	PSMD3, HSP90AB1, PSMB2, PSMD14, PSMD11, PSMB5, PSMA4, BUB3, CCDC47, RPS27A, PSMA7, SKP1, PSMD8, MAD2L1, UCHL1, CUL3, PPP2CB, PSMC3, PSMB4, PPP2R5C, CSNK1A1, PSMD7, PSMD10, STT3B, PSMF1, CLU, PCBP2, PSMD13, BAG6, PSMC5, PSMD1, PSMD2, RACK1, PSMB7, CDK1, VCP, PSMC2, PSMA1, PSMC1, CUL1, KIAA0368, PSMC4, DNAJC10, PSMA2, CCAR2, SMARCC1, PSMD12, PSMB3, PSMD6, PSMA3, PSMB1, PSMC6, HSP90B1, PSME3
mRNA splice site selection	5.95155e-08	GO:0006376	12	1.84775	26	SRSF5, LUC7L2, SRSF6, SF3A3, LUC7L3, SRSF1, PSIP1, SF3A2, SF1, SRSF10, SETX, SRSF9
regulation of canonical Wnt signaling pathway	6.33032e-08	GO:0060828	41	16.6297	234	PSMD3, PSMB2, G3BP1, PSMD14, PSMD11, PSMB5, PSMA4, CTNND1, RPS27A, PSMA7, PSMD8, PPP1CA, CUL3, PSMC3, PSMB4, CSNK1A1, PSMD7, PSMD10, PSMF1, ILK, PSMD13, PSMC5, PSMD1, PSMD2, EMD, VPS35, PSMB7, PSMC2, JUP, PSMA1, PSMC1, PSMC4, PSMA2, CCAR2, PSMD12, PSMB3, PSMD6, PSMA3, PSMB1, PSMC6, PSME3
establishment of organelle localization	6.6277e-08	GO:0051656	60	29.1376	410	XPO1, EZR, SEH1L, SEC31A, KIF5B, AP3M1, DPYSL2, DNM2, SCRIB, SEC13, SEC24A, ACTR3, AP3B1, KPNB1, SEC24C, RAB1B, ACTN4, TMED10, ACTR2, UCHL1, NSF, CUL3, YKT6, RPS15, MAP4, GOSR2, AP3D1, MYH9, SEC24B, SEC23A, EIF6, MYH10, PPP6R3, DYNC1H1, COPG1, CLASP1, NAPA, DCTN1, BICD2, USO1, PPP6C, ATP2A2, SAR1B, ARHGEF2, DCTN2, RAB1A, LRPPRC, RAN, RHOT2, SEC22B, MAP1B, PDCD6IP, VPS4A, STK25, RAB11B, NUMA1, LMA…
vesicle targeting, to, from or within Golgi	6.96997e-08	GO:0048199	19	4.61937	65	SEC31A, SEC13, SEC24A, SEC24C, RAB1B, TMED10, NSF, CUL3, GOSR2, SEC24B, SEC23A, PPP6R3, NAPA, USO1, PPP6C, SAR1B, RAB1A, SEC22B, LMAN1
positive regulation of telomere maintenance	7.00668e-08	GO:0032206	16	3.34016	47	CCT3, MRE11A, CCT7, GNL3, MAPK1, CCT6A, CCT5, TCP1, MAPK3, RAD50, CCT4, DKC1, CCT8, DHX36, HNRNPA1, CCT2
protein localization to nucleus	7.1608e-08	GO:0034504	53	24.4471	344	SPTBN1, IPO5, XPO1, IPO7, HSP90AB1, TRIM28, IPO9, PHB2, CCT3, NUP133, TNPO3, HSP90AA1, KPNB1, CCT7, KPNA6, PDIA3, HNRNPM, IPO4, MAPK1, NUP93, NUP98, CCT6A, G3BP2, KPNA3, LMNA, RPL11, CCT5, TCP1, PSMD10, POLA2, RAE1, RANBP2, TNPO1, KPNA2, NUP155, NUP205, NUP107, MAPK3, EMD, CCT4, RPL23, RAN, FLNA, CDK1, NOP58, JUP, KPNA1, PARP1, CCT8, NUP85, KPNA4, CCT2, IPO8
telomere maintenance via telomere lengthening	7.40776e-08	GO:0010833	18	4.19297	59	CCT3, MRE11A, CCT7, HNRNPC, MAPK1, CCT6A, CCT5, TCP1, NAT10, MAPK3, RAD50, CCT4, DKC1, PARP1, CCT8, HNRNPA1, HNRNPU, CCT2
telomere maintenance via telomerase	7.46724e-08	GO:0007004	17	3.76656	53	CCT3, MRE11A, CCT7, HNRNPC, MAPK1, CCT6A, CCT5, TCP1, NAT10, MAPK3, RAD50, CCT4, DKC1, CCT8, HNRNPA1, HNRNPU, CCT2
glucose metabolic process	7.49342e-08	GO:0006006	37	14.2845	201	PDHA1, ENO1, GFPT1, TPI1, SORD, PFKL, PFKP, MDH1, PKM, GNPDA1, PPP1CB, PPP1CA, SLC25A1, SLC25A11, DLAT, GPI, HMGB1, HK1, SLC25A13, G6PD, GPD2, RANBP2, PGK1, WDR5, AKR1A1, TIGAR, AIMP1, PGM2, GOT2, SLC25A10, ALDOC, PGM1, PDK3, MDH2, PDHB, ADPGK, ALDOA
ribosomal small subunit assembly	8.17651e-08	GO:0000028	10	1.27921	18	RPS14, RPS27, RPL38, RPS15, RPSA, RPS10, RPS27L, RPS19, RPS5, RPS17
regulation of cellular component organization	8.29055e-08	GO:0051128	219	157.059	2210	SPTBN1, SPTBN2, XPO1, PDLIM5, NDRG3, RPL13A, PPP2R1A, EZR, YWHAB, TRIM28, PRMT5, CAPZB, PTPN11, KIF5B, RPS6KA3, NCLN, CNOT1, HUWE1, DDX3X, DPYSL2, VAT1, SMARCA4, ENO1, PHB2, DNM2, CCT3, BUB3, MAPRE1, NPM1, FAM134C, RBBP7, SFPQ, HNRNPK, MRE11A, CLTC, KRT17, SEPT9, TBC1D15, EXOSC2, WDR1, ATXN2L, ACTR3, HCFC1, YWHAQ, HSP90AA1, ACSL3, U2AF1, PSMD8, CCT7, MAD2L1, RAB1B, OTUB1, RAB7A, ACTN4, RAC1, ACTR…
regulation of establishment of protein localization to chromosome	8.64336e-08	GO:0070202	8	0.781739	11	CCT7, CCT6A, CCT5, TCP1, CCT4, DKC1, CCT8, CCT2
nucleus organization	8.65625e-08	GO:0006997	29	9.73621	137	PPP2R1A, SEH1L, AAAS, HMGB2, NUP153, NUP133, SRPK1, NUP93, NUP98, NUP210, LMNA, PES1, RAE1, TMEM33, RANBP2, TARDBP, NUP155, NUP205, NUP107, RPS19, EMD, CDK1, PDCD6IP, PPP2R2A, VPS4A, NUP160, NUMA1, NUP85, PAFAH1B1
regulation of telomere maintenance via telomere lengthening	9.82031e-08	GO:1904356	16	3.41123	48	CCT3, CCT7, HNRNPC, MAPK1, CCT6A, CCT5, TCP1, NAT10, MAPK3, CCT4, DKC1, PARP1, CCT8, HNRNPA1, HNRNPU, CCT2
negative regulation of protein modification process	1.00342e-07	GO:0031400	75	40.153	565	PSMD3, PPP2R1A, EZR, YWHAB, PSMB2, PSMD14, GSTP1, PSMD11, PSMB5, HSPH1, PSMA4, BUB3, NPM1, PAK2, RPS27A, PSMA7, PSMD8, MAD2L1, OTUB1, CDK2, UCHL1, CUL3, PTPA, PSMC3, GMFB, YWHAE, PSMB4, PHB, CORO1C, G6PD, YWHAG, CHORDC1, TIPRL, PSMD7, PRKDC, HSPA1A, PSMD10, PDCD4, PSMF1, ILK, PSMD13, BAX, PSMC5, TARDBP, PSMD1, PPP5C, PSMD2, RACK1, PTPN1, PSMB7, CDK1, PSMC2, HDAC2, GPS1, PSMA1, PSMC1, DNMT1, TRIP1…
response to endoplasmic reticulum stress	1.06064e-07	GO:0034976	43	18.1932	256	SEC31A, AARS, TRIM25, GFPT1, CCDC47, SSR1, HYOU1, PDIA6, EEF2, PDIA3, PPP2CB, PSMC3, GOSR2, AIFM1, SRPRB, ASNS, LMNA, HSPA1A, STT3B, TMEM33, BAG6, BAX, PSMC5, TARDBP, DCTN1, ERP29, ATP2A2, RACK1, ADD1, PTPN1, VCP, PSMC2, TLN1, PSMC1, SEC61A1, EIF2S1, KIAA0368, PSMC4, DNAJC10, EIF2AK2, SRPRA, PSMC6, HSP90B1
monosaccharide biosynthetic process	1.17083e-07	GO:0046364	22	6.18285	87	ENO1, TPI1, SORD, MDH1, PGD, SLC25A1, SLC25A11, GPI, SLC25A13, G6PD, GPD2, RANBP2, PGK1, WDR5, TALDO1, GOT2, SLC25A10, ALDOC, PGM1, MDH2, AKR1B1, ALDOA
protein polyubiquitination	1.1768e-07	GO:0000209	42	17.6247	248	PSMD3, PSMB2, PSMD14, PSMD11, HUWE1, PSMB5, PSMA4, RPS27A, PSMA7, SKP1, PSMD8, OTUB1, CUL3, PSMC3, UBE2V1, PSMB4, BLMH, PSMD7, PSMD10, PSMF1, PSMD13, PSMC5, NPEPPS, PSMD1, PSMD2, PSMB7, PSMC2, PSMA1, PSMC1, CUL1, TRIP12, PSMC4, PSMA2, PSMD12, PSMB3, PSMD6, PRPF19, PSMA3, TPP2, PSMB1, PSMC6, PSME3
negative regulation of Wnt signaling pathway	1.35546e-07	GO:0030178	36	14.0002	197	PSMD3, PSMB2, G3BP1, PSMD14, PSMD11, PSMB5, PSMA4, CTNND1, RPS27A, PSMA7, PSMD8, CUL3, PSMC3, PSMB4, CSNK1A1, PSMD7, PSMD10, PSMF1, PSMD13, PSMC5, PSMD1, PSMD2, RACK1, PSMB7, PSMC2, PSMA1, PSMC1, PSMC4, PSMA2, PSMD12, PSMB3, PSMD6, PSMA3, PSMB1, PSMC6, PSME3
nuclear envelope organization	1.4267e-07	GO:0006998	21	5.75644	81	PPP2R1A, SEH1L, AAAS, NUP153, NUP133, NUP93, NUP98, NUP210, LMNA, RAE1, RANBP2, TARDBP, NUP155, NUP205, NUP107, EMD, CDK1, PPP2R2A, NUP160, NUP85, PAFAH1B1
innate immune response-activating signal transduction	1.46233e-07	GO:0002758	41	17.1272	241	PSMD3, PSMB2, PSMD14, RPS6KA3, PSMD11, PSMB5, PSMA4, PAK2, RPS27A, PSMA7, SKP1, PSMD8, PSMC3, UBE2V1, PSMB4, HMGB1, PSMD7, HSPA1A, PSMD10, PSMF1, PSMD13, PSMC5, PSMD1, PSMD2, C1QBP, HSPD1, PSMB7, PSMC2, PSMA1, PSMC1, CUL1, PSMC4, PSMA2, PSMD12, PSMB3, PSMD6, PSMA3, PSMB1, PSMC6, HSP90B1, PSME3
phosphate-containing compound metabolic process	1.56616e-07	GO:0006796	281	213.202	3000	LDHB, SPTBN1, LDHA, AK2, PDHA1, SPTBN2, EIF2A, RNASEH2B, TIMM50, NDUFC2, HADHA, TYMS, PSMD3, PPP2R1A, ATP6V1B2, EZR, YWHAB, COASY, HSP90AB1, TRIM28, PSMB2, PRMT5, IMPDH2, PTPN11, ATP5A1, PSMD14, ARF3, RPS6KA3, GSTP1, RBM4, PSMD11, UGP2, ATP5F1, PSMB5, AGK, PRPS1, CAB39, ATIC, HSPH1, ENO1, GFPT1, PHB2, PSMA4, SULT1A1, SPAG9, NPM1, IDH3B, TPI1, ACOT7, CNP, DHFR, EEF1A2, GMPS, ATP6V1A, NDUFA9, SORD,…
cellular response to tumor necrosis factor	1.64247e-07	GO:0071356	41	17.1983	242	PSMD3, PSMB2, PSMD14, GSTP1, PSMD11, PSMB5, PSMA4, RPS27A, PSMA7, ASS1, PSMD8, PSMC3, PSMB4, PSMD7, HSPA1A, PSMD10, PSMF1, KRT18, PSMD13, PSMC5, PSMD1, PSMD2, STAT1, ARHGEF2, RACK1, KRT8, PSMB7, PSMC2, PSMA1, PSMC1, CPNE1, PRPF8, PSMC4, PSMA2, PSMD12, PSMB3, PSMD6, PSMA3, PSMB1, PSMC6, PSME3
membrane budding	1.68555e-07	GO:0006900	24	7.31992	103	SEC31A, VTA1, SEC13, SEC24A, SEC24C, RAB1B, TMED10, NSF, CUL3, ANXA2, GOSR2, SEC24B, SEC23A, PPP6R3, VAPA, NAPA, USO1, PPP6C, SAR1B, RAB1A, SEC22B, PDCD6IP, VPS4A, LMAN1
modification-dependent macromolecule catabolic process	1.69599e-07	GO:0043632	74	39.9398	562	PSMD3, HSP90AB1, PSMB2, USP9X, PSMD14, PSMD11, TRIM25, HUWE1, PSMB5, PSMA4, BUB3, CCDC47, RPS27A, PSMA7, SKP1, CUL2, PNPT1, EXOSC2, HECTD1, PSMD8, USP10, MAD2L1, UBR4, UCHL1, CUL3, PPP2CB, UBE2I, PSMC3, USP47, TCEB1, PSMB4, PPP2R5C, USP7, CSNK1A1, PSMD7, PSMD10, STT3B, PSMF1, CLU, PCBP2, PSMD13, NEDD8, BAG6, PSMC5, PSMD1, LONP1, PSMD2, RACK1, CUL4B, PSMB7, CDK1, UBA6, VCP, PSMC2, PSMA1, PSMC1, CU…
ribosomal small subunit biogenesis	1.72476e-07	GO:0042274	18	4.40617	62	RPS14, RPS24, BYSL, RPS27, RPL38, RPS15, MRPS9, RPSA, RPS10, RPS27L, RPS7, RPS19, RPS6, RPS16, RPS5, RPS17, EMG1, RPS8
regulation of telomere maintenance via telomerase	1.7607e-07	GO:0032210	15	3.12696	44	CCT3, CCT7, HNRNPC, MAPK1, CCT6A, CCT5, TCP1, NAT10, MAPK3, CCT4, DKC1, CCT8, HNRNPA1, HNRNPU, CCT2
cellular protein catabolic process	1.77787e-07	GO:0044257	82	45.9094	646	YME1L1, PSMD3, EZR, HSP90AB1, PSMB2, USP9X, PSMD14, PSMD11, TRIM25, HUWE1, PSMB5, PSMA4, BUB3, CCDC47, RPS27A, PSMA7, SKP1, CUL2, HECTD1, PSMD8, USP10, MAD2L1, RAB7A, UBR4, UCHL1, CUL3, PPP2CB, UBE2I, PSMC3, ANXA2, CAPN2, USP47, TCEB1, PSMB4, PPP2R5C, USP7, MSN, CSNK1A1, PSMD7, PSMD10, CLPP, STT3B, PSMF1, CLU, PCBP2, PSMD13, NEDD8, BAG6, PSMC5, PSMD1, LONP1, PSMD2, RACK1, CUL4B, PSMB7, CDK1, UBA6…
positive regulation of transferase activity	1.96186e-07	GO:0051347	79	43.7774	616	PSMD3, HSP90AB1, PSMB2, PTPN11, PSMD14, PSMD11, PSMB5, CAB39, HSPH1, PSMA4, SPAG9, BUB3, EEF1A2, MRE11A, PAK2, RPS27A, PSMA7, SKP1, PSMD8, MAD2L1, RAC1, UBE2I, PSMC3, IQGAP1, MAPK1, RPS2, DCUN1D5, PSMB4, RFC5, PRKAG1, HMGB1, ADNP, RFC2, TCP1, PSMD7, PSMD10, RFC3, HACD3, PSMF1, ILK, CLU, PSMD13, ZNF622, BAX, PSMC5, TELO2, ERP29, PSMD1, MAPK3, PSMD2, RAD50, CCT4, PTPN1, TIGAR, PSMB7, DKC1, COPS8, C…
phosphorus metabolic process	2.00234e-07	GO:0006793	281	213.77	3008	LDHB, SPTBN1, LDHA, AK2, PDHA1, SPTBN2, EIF2A, RNASEH2B, TIMM50, NDUFC2, HADHA, TYMS, PSMD3, PPP2R1A, ATP6V1B2, EZR, YWHAB, COASY, HSP90AB1, TRIM28, PSMB2, PRMT5, IMPDH2, PTPN11, ATP5A1, PSMD14, ARF3, RPS6KA3, GSTP1, RBM4, PSMD11, UGP2, ATP5F1, PSMB5, AGK, PRPS1, CAB39, ATIC, HSPH1, ENO1, GFPT1, PHB2, PSMA4, SULT1A1, SPAG9, NPM1, IDH3B, TPI1, ACOT7, CNP, DHFR, EEF1A2, GMPS, ATP6V1A, NDUFA9, SORD,…
cell cycle G2/M phase transition	2.14617e-07	GO:0044839	35	13.6449	192	RNASEH2B, PPP2R1A, CKAP5, DNM2, MAPRE1, NPM1, MRE11A, RPS27A, SKP1, HSP90AA1, FANCI, CDK2, PPP1CB, TUBB4B, USP47, YWHAE, TUBB4A, YWHAG, CDK4, DYNC1I2, DYNC1H1, CLASP1, DYNLL1, KHDRBS1, TUBG1, DCTN1, RCC2, DCTN2, TUBB, CDK1, CUL1, PPP2R2A, TUBA1A, ACTR1A, PAFAH1B1
ADP metabolic process	2.16145e-07	GO:0046031	20	5.40111	76	LDHA, AK2, ENO1, TPI1, PFKL, PFKP, PKM, GPI, PRKAG1, HK1, EIF6, PGK1, GALK1, TIGAR, ALDOC, AK1, PGM1, ADPGK, OGDH, ALDOA
nucleobase metabolic process	2.17014e-07	GO:0009112	14	2.77162	39	TYMS, PRPS1, GMPS, GART, SHMT1, CMPK1, MAPK1, RRM1, CAD, PPAT, PAICS, UMPS, APRT, HPRT1
single-organism process	2.18294e-07	GO:0044699	995	928.138	13060	LDHB, SPTBN1, LDHA, RBMX, SRP54, TIMM44, PARN, ANXA3, AK2, RSL1D1, FARSA, PDHA1, ARF5, SPTBN2, GAPVD1, IPO5, XPO1, PDLIM5, DECR1, EIF2A, HARS, RNASEH2B, TIMM50, NDUFC2, YME1L1, NDRG3, HADHA, DARS2, NAXE, KRT2, MYO1B, DNAJA3, RPL13, UBE2M, CLPTM1, RPL13A, TYMS, PSMD3, DDX6, PPP2R1A, CAPN1, RPS14, HSD17B12, SLIRP, ATP6V1B2, GNAS, AGPS, EZR, IPO7, SNRNP200, TXNL1, YWHAB, COASY, HSP90AB1, SEH1L, GLUD…
single-organism localization	2.1882e-07	GO:1902578	317	246.603	3470	SPTBN1, SRP54, TIMM44, ANXA3, IPO5, TIMM50, DNAJA3, RPL13, RPL13A, RPS14, ATP6V1B2, GNAS, EZR, IPO7, YWHAB, HSP90AB1, SEH1L, GLUD1, TRIM28, RPL26, SLC38A2, PTPN11, KIF5B, ATP5A1, IPO9, AP3M1, ANXA6, AAAS, ATP5F1, SRP68, DPYSL2, CAB39, RAB10, RPL10, VTA1, PHB2, DNM2, RPS24, NUP153, RPS3A, SCRIB, RPL23A, NUP133, RPL34, ATP6V1A, NDUFA9, HNRNPK, PFKL, CLTC, RPL17, RPS27A, RPS20, TNPO3, CLNS1A, SSR1, …
negative regulation of metabolic process	2.25894e-07	GO:0009892	236	173.973	2448	RBMX, XPO1, RNASEH2B, DNAJA3, RPL13A, PSMD3, PPP2R1A, RPS14, SLIRP, EZR, YWHAB, HSP90AB1, SEH1L, TRIM28, PSMB2, PRMT5, SRSF2, USP9X, HNRNPD, SRSF7, PSMD14, RPS6KA3, GSTP1, MSH6, RBM4, PSMD11, CNOT9, CNOT1, AAAS, DDX3X, HMGB2, PSMB5, PSPC1, SMARCA4, MTDH, HSPH1, ENO1, GFPT1, PHB2, PSMA4, BUB3, SUPT5H, NUP153, PDS5A, NPM1, HIST1H4A, NUP133, CTBP2, SMARCA5, RBBP7, SRSF6, TSN, SFPQ, HNRNPK, MRE11A, P…
G2/M transition of mitotic cell cycle	2.28245e-07	GO:0000086	34	13.0764	184	RNASEH2B, PPP2R1A, CKAP5, DNM2, MAPRE1, MRE11A, RPS27A, SKP1, HSP90AA1, FANCI, CDK2, PPP1CB, TUBB4B, USP47, YWHAE, TUBB4A, YWHAG, CDK4, DYNC1I2, DYNC1H1, CLASP1, DYNLL1, KHDRBS1, TUBG1, DCTN1, RCC2, DCTN2, TUBB, CDK1, CUL1, PPP2R2A, TUBA1A, ACTR1A, PAFAH1B1
purine nucleobase biosynthetic process	2.42971e-07	GO:0009113	8	0.852807	12	PRPS1, GMPS, GART, SHMT1, PPAT, PAICS, APRT, HPRT1
response to unfolded protein	2.51545e-07	GO:0006986	32	11.9393	168	HSP90AB1, SEC31A, AARS, HSPH1, GFPT1, SSR1, HYOU1, HSP90AA1, PDIA6, HSPA4L, GOSR2, SRPRB, ASNS, LMNA, HSPA1A, STT3B, TMEM33, BAX, DCTN1, RACK1, ADD1, PTPN1, HSPD1, VCP, TLN1, SEC61A1, EIF2S1, DNAJA1, SERPINH1, EIF2AK2, SRPRA, HSP90B1
nucleoside triphosphate biosynthetic process	2.55213e-07	GO:0009142	19	4.9747	70	TYMS, ATP5A1, ATP5F1, ATP5L, PKM, ATP5O, CTPS1, CMPK1, STOML2, SLC25A13, CAD, ATP5H, ATP5B, NME3, ATP5J2, AK1, VCP, ATP5C1, ALDOA
single-organism transport	2.69197e-07	GO:0044765	302	233.456	3285	SPTBN1, SRP54, TIMM44, ANXA3, IPO5, TIMM50, RPL13, RPL13A, RPS14, ATP6V1B2, GNAS, EZR, IPO7, HSP90AB1, SEH1L, GLUD1, TRIM28, RPL26, SLC38A2, PTPN11, KIF5B, ATP5A1, IPO9, AP3M1, ANXA6, AAAS, ATP5F1, SRP68, DPYSL2, CAB39, RAB10, RPL10, VTA1, PHB2, DNM2, RPS24, NUP153, RPS3A, SCRIB, RPL23A, NUP133, RPL34, ATP6V1A, NDUFA9, HNRNPK, PFKL, CLTC, RPL17, RPS27A, RPS20, TNPO3, CLNS1A, SSR1, RPS13, BSG, PNP…
proteasomal protein catabolic process	2.82924e-07	GO:0010498	55	26.8634	378	PSMD3, HSP90AB1, PSMB2, PSMD14, PSMD11, PSMB5, PSMA4, BUB3, CCDC47, RPS27A, PSMA7, SKP1, PSMD8, MAD2L1, UCHL1, CUL3, PPP2CB, PSMC3, PSMB4, PPP2R5C, CSNK1A1, PSMD7, PSMD10, STT3B, PSMF1, CLU, PCBP2, PSMD13, BAG6, PSMC5, PSMD1, PSMD2, RACK1, PSMB7, CDK1, VCP, PSMC2, PSMA1, PSMC1, CUL1, KIAA0368, PSMC4, DNAJC10, PSMA2, CCAR2, SMARCC1, PSMD12, PSMB3, PSMD6, PRPF19, PSMA3, PSMB1, PSMC6, HSP90B1, PSME3
small molecule biosynthetic process	3.028e-07	GO:0044283	65	33.9701	478	HSD17B12, GLUD1, PRPS1, ENO1, TPI1, ACOT7, DHFR, NDUFA9, SORD, SHMT1, ASS1, MDH1, CYB5R3, PGD, ACSL3, PKM, ACACA, FASN, SLC25A1, SLC25A11, GLS, ANXA1, GPI, OAT, HMGCS1, PRKAG1, ASNS, LBR, SHMT2, SLC25A13, EIF6, G6PD, AHCY, CAD, HSD17B4, ACLY, AASDHPPT, HACD3, GPD2, RANBP2, PHGDH, PGK1, WDR5, MTHFD1, PTGES3, PNP, AKR1A1, CBR1, ABCD3, TALDO1, GOT2, POR, SLC25A10, NSDHL, ACAT1, ALDOC, FDPS, PGM1, LT…
regulation of response to stress	3.09428e-07	GO:0080134	143	94.9458	1336	RSL1D1, RNASEH2B, PSMD3, EZR, HSP90AB1, SEH1L, TRIM28, PSMB2, PTPN11, PSMD14, RPS6KA3, GSTP1, PSMD11, AAAS, HMGB2, PSMB5, HSPH1, PHB2, PSMA4, SPAG9, NUP153, NPM1, NUP133, DHFR, SRSF6, SFPQ, ZC3HAV1, HNRNPK, PAK2, RPS27A, PSMA7, SKP1, PNPT1, HYOU1, DDX5, MDH1, HSP90AA1, PSMD8, OTUB1, RAC1, ATP6V1H, PSMC3, ANXA2, MAPK1, NUP93, AP2B1, USP47, ANXA1, BCLAF1, STK24, AP1M1, NUP98, SNRPB, PCNA, CDC37, NU…
response to topologically incorrect protein	3.16263e-07	GO:0035966	33	12.65	178	HSP90AB1, SEC31A, AARS, HSPH1, GFPT1, SSR1, HYOU1, HSP90AA1, PDIA6, HSPA4L, GOSR2, SRPRB, ASNS, LMNA, HSPA1A, STT3B, TMEM33, CLU, BAX, DCTN1, RACK1, ADD1, PTPN1, HSPD1, VCP, TLN1, SEC61A1, EIF2S1, DNAJA1, SERPINH1, EIF2AK2, SRPRA, HSP90B1
oxidative phosphorylation	3.21066e-07	GO:0006119	23	7.03565	99	AK2, NDUFC2, NDUFA9, CYC1, UQCRC2, COX4I1, NDUFA13, NDUFB4, COX6C, DLD, MSH2, NDUFA4, NDUFS2, NDUFA10, NDUFV1, CYCS, VCP, UQCR10, UQCRC1, UQCRFS1, PMPCB, NDUFS1, ATP5C1
nucleoside diphosphate phosphorylation	3.45652e-07	GO:0006165	21	6.04071	85	LDHA, ENO1, TPI1, PFKL, PFKP, PKM, CMPK1, GPI, PRKAG1, HK1, EIF6, PGK1, GALK1, NME3, TIGAR, ALDOC, AK1, PGM1, ADPGK, OGDH, ALDOA
proteolysis involved in cellular protein catabolic process	3.46054e-07	GO:0051603	78	43.6353	614	YME1L1, PSMD3, HSP90AB1, PSMB2, USP9X, PSMD14, PSMD11, TRIM25, HUWE1, PSMB5, PSMA4, BUB3, CCDC47, RPS27A, PSMA7, SKP1, CUL2, HECTD1, PSMD8, USP10, MAD2L1, UBR4, UCHL1, CUL3, PPP2CB, UBE2I, PSMC3, CAPN2, USP47, TCEB1, PSMB4, PPP2R5C, USP7, CSNK1A1, PSMD7, PSMD10, CLPP, STT3B, PSMF1, CLU, PCBP2, PSMD13, NEDD8, BAG6, PSMC5, PSMD1, LONP1, PSMD2, RACK1, CUL4B, PSMB7, CDK1, UBA6, VCP, PSMC2, PSMA1, PDC…
nuclear chromosome segregation	3.54946e-07	GO:0098813	43	18.9749	267	XPO1, PPP2R1A, SEH1L, CKAP5, NAA50, PHB2, BUB3, MAPRE1, PDS5A, NUP133, SEC13, SFPQ, MRE11A, ACTR3, KPNB1, RPS27, MAD2L1, ACTR2, CUL3, NCAPD2, CSNK2A2, NUP98, SMC2, SMC1A, TRIP13, STAG2, NCAPG, CLASP1, RANBP2, CSNK2A1, BAG6, NUP107, RCC2, PDCD6IP, VPS4A, NUP160, DYNC1LI1, NUP85, SMC3, SMC4, MCMBP, PAFAH1B1, RANGAP1
activation of innate immune response	3.61957e-07	GO:0002218	41	17.6957	249	PSMD3, PSMB2, PSMD14, RPS6KA3, PSMD11, PSMB5, PSMA4, PAK2, RPS27A, PSMA7, SKP1, PSMD8, PSMC3, UBE2V1, PSMB4, HMGB1, PSMD7, HSPA1A, PSMD10, PSMF1, PSMD13, PSMC5, PSMD1, PSMD2, C1QBP, HSPD1, PSMB7, PSMC2, PSMA1, PSMC1, CUL1, PSMC4, PSMA2, PSMD12, PSMB3, PSMD6, PSMA3, PSMB1, PSMC6, HSP90B1, PSME3
small molecule catabolic process	3.93581e-07	GO:0044282	49	23.0258	324	DECR1, HADHA, GLUD1, ENO1, TPI1, FAH, SORD, PFKL, PFKP, SHMT1, PKM, ETFB, ESD, ALDH3A2, GLS, ALDH1B1, GPI, OAT, OXCT1, HSD17B10, HK1, DLD, AHCY, HSD17B4, ETFA, PPAT, GPD2, PGK1, AKR1A1, GALK1, ABCD3, HADHB, TIGAR, DTD1, PGM2, GOT2, ACAT1, ALDOC, ACAD9, PGM1, MCCC2, PCCB, ADH5, ECHS1, ACOX1, OGDH, GCDH, ALDOA, ALDH7A1
modification-dependent protein catabolic process	4.14372e-07	GO:0019941	72	39.3712	554	PSMD3, HSP90AB1, PSMB2, USP9X, PSMD14, PSMD11, TRIM25, HUWE1, PSMB5, PSMA4, BUB3, CCDC47, RPS27A, PSMA7, SKP1, CUL2, HECTD1, PSMD8, USP10, MAD2L1, UBR4, UCHL1, CUL3, PPP2CB, UBE2I, PSMC3, USP47, TCEB1, PSMB4, PPP2R5C, USP7, CSNK1A1, PSMD7, PSMD10, STT3B, PSMF1, CLU, PCBP2, PSMD13, NEDD8, BAG6, PSMC5, PSMD1, LONP1, PSMD2, RACK1, CUL4B, PSMB7, CDK1, UBA6, VCP, PSMC2, PSMA1, PSMC1, CUL1, TRIP12, KIA…
mitochondrial transmembrane transport	4.26648e-07	GO:1990542	17	4.19297	59	TIMM44, TIMM50, ATP5A1, ATP5F1, ATP5L, HSP90AA1, ATP5O, ACACA, NDUFA13, STOML2, ATP5H, TOMM40, AFG3L2, ATP5B, TOMM22, ATP5J2, ATP5C1
single-organism biosynthetic process	4.30141e-07	GO:0044711	139	92.1742	1297	AK2, PDHA1, TYMS, HSD17B12, AGPS, COASY, GLUD1, IMPDH2, PTPN11, ATP5A1, ARF3, GSTP1, UGP2, ATP5F1, AGK, PRPS1, ATIC, ENO1, GFPT1, TPI1, ACOT7, DHFR, GMPS, NDUFA9, SORD, CLTC, RPS27A, GART, ATP5L, SHMT1, ASS1, MDH1, ADSS, CYB5R3, CPNE3, PGD, ACSL3, PKM, CPOX, ATP5O, ACACA, FASN, CTPS1, IDH1, PPP1CB, PPP1CA, GYS1, SLC25A1, SLC25A11, DLAT, CMPK1, ESD, DPM1, ALDH3A2, PRPSAP2, GLS, ANXA1, GNAI3, GPI, …
monosaccharide metabolic process	4.50386e-07	GO:0005996	41	17.8379	251	PDHA1, ENO1, GFPT1, TPI1, SORD, PFKL, PFKP, MDH1, PGD, PKM, GNPDA1, PPP1CB, PPP1CA, SLC25A1, SLC25A11, DLAT, GPI, HMGB1, HK1, SLC25A13, G6PD, GPD2, RANBP2, PGK1, WDR5, AKR1A1, GALK1, TALDO1, TIGAR, AIMP1, PGM2, GOT2, SLC25A10, ALDOC, PGM1, PDK3, MDH2, PDHB, AKR1B1, ADPGK, ALDOA
ubiquitin-dependent protein catabolic process	4.88601e-07	GO:0006511	71	38.8027	546	PSMD3, HSP90AB1, PSMB2, USP9X, PSMD14, PSMD11, TRIM25, HUWE1, PSMB5, PSMA4, BUB3, CCDC47, RPS27A, PSMA7, SKP1, CUL2, HECTD1, PSMD8, USP10, MAD2L1, UBR4, UCHL1, CUL3, PPP2CB, UBE2I, PSMC3, USP47, TCEB1, PSMB4, PPP2R5C, USP7, CSNK1A1, PSMD7, PSMD10, STT3B, PSMF1, CLU, PCBP2, PSMD13, NEDD8, BAG6, PSMC5, PSMD1, PSMD2, RACK1, CUL4B, PSMB7, CDK1, UBA6, VCP, PSMC2, PSMA1, PSMC1, CUL1, TRIP12, KIAA0368, …
protein modification by small protein conjugation or removal	4.89911e-07	GO:0070647	112	70.4276	991	UBE2M, PSMD3, HSP90AB1, SEH1L, TRIM28, PSMB2, USP9X, PSMD14, PSMD11, TRIM25, AAAS, HUWE1, PSMB5, PSMA4, BUB3, NUP153, UBA2, NUP133, HNRNPK, RPS27A, PSMA7, SKP1, CUL2, HSP90AA1, HECTD1, FANCI, PSMD8, USP10, MAD2L1, OTUB1, CDK2, UBR4, GNL3, UCHL1, CAND1, CUL3, UBE2I, PSMC3, HNRNPC, AIMP2, NUP93, USP47, DCUN1D5, NUP98, PCNA, NUP210, TCEB1, UBE2V1, PSMB4, SMC1A, SHMT2, USP7, CDK9, BLMH, PSMD7, STAG2,…
DNA biosynthetic process	5.92217e-07	GO:0071897	35	14.2134	200	TYMS, TRIM25, CCT3, MRE11A, RPS27A, CCT7, USP10, HNRNPC, MAPK1, PCNA, CCT6A, PHB, RFC5, RFC2, CCT5, TCP1, POLA2, RFC3, RPA1, PTGES3, POLD1, NAT10, DDX39B, MAPK3, RAD50, CCT4, POLA1, DKC1, PPIA, VCP, MYBBP1A, CCT8, HNRNPA1, HNRNPU, CCT2
regulation of RNA polymerase II transcriptional preinitiation complex assembly	5.92627e-07	GO:0045898	8	0.923874	13	CAND1, PSMC3, HMGB1, PSMC5, PSMC2, PSMC1, PSMC4, PSMC6
positive regulation of organelle organization	6.07166e-07	GO:0010638	73	40.5083	570	YWHAB, TRIM28, CNOT1, HUWE1, PHB2, CCT3, SFPQ, MRE11A, SEPT9, WDR1, ACTR3, YWHAQ, U2AF1, PSMD8, CCT7, RAC1, ACTR2, GNL3, PFN1, CUL3, ANXA2, MAPK1, U2AF2, ANXA1, CSNK2A2, ARPC4, GMFB, CCT6A, YWHAE, ARPC1A, CORO1B, RUVBL1, DNM1L, WDR61, STOML2, CDK9, MSN, NMT1, YWHAG, CCT5, TCP1, CLASP1, DYNLL1, BAX, NPEPPS, ACTL6A, SURF4, MAPK3, RAD50, RUVBL2, DSTN, C1QBP, CCT4, ARPC2, PSMB7, DKC1, PDCD6IP, DNMT1,…
glycolytic process	6.21384e-07	GO:0006096	18	4.7615	67	LDHA, ENO1, TPI1, PFKL, PFKP, PKM, GPI, PRKAG1, HK1, EIF6, PGK1, GALK1, TIGAR, ALDOC, PGM1, ADPGK, OGDH, ALDOA
response to temperature stimulus	6.22939e-07	GO:0009266	37	15.4927	218	DNAJA3, HSP90AB1, SEH1L, AAAS, HSPH1, NUP153, NUP133, RBBP7, MYOF, PDCD6, HSP90AA1, MAPK1, NUP93, CLPB, NUP98, NUP210, PSIP1, YWHAE, CHORDC1, DNAJC7, HSPA1A, RAE1, RPA1, RANBP2, PTGES3, NUP155, NUP205, NUP107, MAPK3, HSPD1, HDAC2, DNMT1, EIF2S1, DNAJA1, NUP160, CCAR2, NUP85
gene silencing	6.28606e-07	GO:0016458	40	17.4115	245	SEH1L, TRIM28, RBM4, CNOT9, CNOT1, AAAS, NUP153, HIST1H4A, NUP133, SMARCA5, TSN, HIST1H2AG, CDK2, PABPC1, NUP93, NUP98, NUP210, HAT1, EIF6, SRRT, RAE1, FXR1, RANBP2, NUP155, NUP205, NUP107, POLR2B, RAN, HDAC2, NCBP1, DNMT1, XPO5, SND1, NUP160, POLR2H, NUP85, HNRNPA2B1, ADAR, MRPL44, IPO8
chaperone-mediated protein folding	6.38889e-07	GO:0061077	15	3.41123	48	UNC45A, HSPH1, CHORDC1, DNAJC7, PPIB, FKBP10, CSNK2A1, CLU, PTGES3, FKBP8, FKBP3, ST13, TRAP1, FKBP5, CCT2
DNA replication	6.4186e-07	GO:0006260	44	20.041	282	DNAJA3, PPP2R1A, PDS5A, SUPT16H, RBBP7, MRE11A, CDK2, RAC1, MCM6, FEN1, UPF1, NUP98, PCNA, MCM4, RFC5, RRM1, MCM5, SMC1A, STOML2, CDK9, RFC2, NAP1L1, STAG2, POLA2, RFC3, RPA1, POLD1, MCM7, RBM14, LONP1, RAD50, SSRP1, MCM3, DTD1, POLA1, CDK1, TOP1, PARP1, MCM2, SMC3, RBBP4, MCMBP, ALYREF, PRIM2
mitochondrial ATP synthesis coupled proton transport	6.47127e-07	GO:0042776	9	1.20814	17	ATP5A1, ATP5F1, ATP5L, ATP5O, STOML2, ATP5H, ATP5B, ATP5J2, ATP5C1
response to tumor necrosis factor	6.77664e-07	GO:0034612	42	18.7617	264	PSMD3, PSMB2, PSMD14, GSTP1, PSMD11, PSMB5, PSMA4, GSS, RPS27A, PSMA7, ASS1, PSMD8, PSMC3, PSMB4, PSMD7, HSPA1A, PSMD10, PSMF1, KRT18, PSMD13, PSMC5, PSMD1, PSMD2, STAT1, ARHGEF2, RACK1, KRT8, PSMB7, PSMC2, PSMA1, PSMC1, CPNE1, PRPF8, PSMC4, PSMA2, PSMD12, PSMB3, PSMD6, PSMA3, PSMB1, PSMC6, PSME3
nucleotide biosynthetic process	7.23413e-07	GO:0009165	46	21.4623	302	AK2, TYMS, COASY, IMPDH2, ATP5A1, ATP5F1, PRPS1, ATIC, ACOT7, DHFR, GMPS, GART, ATP5L, SHMT1, ADSS, PKM, ATP5O, CTPS1, CMPK1, PRPSAP2, GNAI3, CAP1, RRM1, ADNP, STOML2, SLC25A13, CAD, ATP5H, PPAT, PAICS, MTHFD1, ATP5B, PNP, NAMPT, NME3, ATP5J2, AK1, VCP, UMPS, APRT, HPRT1, KARS, ATP5C1, ADSL, ALDOA, GNAI2
organelle localization	7.63609e-07	GO:0051640	63	33.4016	470	XPO1, EZR, SEH1L, SEC31A, KIF5B, AP3M1, DPYSL2, DNM2, CLUH, SCRIB, SEC13, SEC24A, ACTR3, AP3B1, KPNB1, SEC24C, RAB1B, ACTN4, TMED10, ACTR2, UCHL1, NSF, CUL3, YKT6, RPS15, DOCK7, MAP4, NUP98, GOSR2, AP3D1, MYH9, SEC24B, SEC23A, EIF6, MYH10, PPP6R3, DYNC1H1, COPG1, CLASP1, NAPA, DCTN1, BICD2, USO1, PPP6C, ATP2A2, SAR1B, ARHGEF2, DCTN2, RAB1A, LRPPRC, RAN, RHOT2, SEC22B, MAP1B, PDCD6IP, VPS4A, STK25…
ATP generation from ADP	7.89468e-07	GO:0006757	18	4.83257	68	LDHA, ENO1, TPI1, PFKL, PFKP, PKM, GPI, PRKAG1, HK1, EIF6, PGK1, GALK1, TIGAR, ALDOC, PGM1, ADPGK, OGDH, ALDOA
protein catabolic process	7.92046e-07	GO:0030163	91	54.5086	767	XPO1, YME1L1, PSMD3, EZR, HSP90AB1, PSMB2, USP9X, PSMD14, PSMD11, TRIM25, HUWE1, PSMB5, PSMA4, BUB3, CCDC47, CTSD, RPS27A, PSMA7, SKP1, CUL2, HECTD1, PSMD8, USP10, MAD2L1, RAB7A, UBR4, UCHL1, NSF, CUL3, PPP2CB, UBE2I, PSMC3, ANXA2, CAPN2, USP47, NDUFA13, TCEB1, PSMB4, PHB, PPP2R5C, USP7, MSN, CSNK1A1, PSMD7, PSMD10, CLPP, STT3B, PSMF1, SF3B3, CSNK2A1, CLU, PCBP2, PSMD13, NEDD8, BAG6, PSMC5, PSMD1…
alternative mRNA splicing, via spliceosome	8.61363e-07	GO:0000380	14	3.05589	43	RBMX, SRSF2, RBM4, SRSF6, SFPQ, RBM25, DDX5, HNRNPM, SRSF1, PTBP1, THRAP3, HNRNPL, CDK13, RNPS1
hexose metabolic process	8.7732e-07	GO:0019318	39	16.9851	239	PDHA1, ENO1, GFPT1, TPI1, SORD, PFKL, PFKP, MDH1, PKM, GNPDA1, PPP1CB, PPP1CA, SLC25A1, SLC25A11, DLAT, GPI, HMGB1, HK1, SLC25A13, G6PD, GPD2, RANBP2, PGK1, WDR5, AKR1A1, GALK1, TIGAR, AIMP1, PGM2, GOT2, SLC25A10, ALDOC, PGM1, PDK3, MDH2, PDHB, AKR1B1, ADPGK, ALDOA
positive regulation of RNA polymerase II transcriptional preinitiation complex assembly	8.92036e-07	GO:0045899	7	0.710672	10	CAND1, PSMC3, PSMC5, PSMC2, PSMC1, PSMC4, PSMC6
protein localization to mitochondrion	8.96636e-07	GO:0070585	33	13.2185	186	TIMM44, TIMM50, YWHAB, HUWE1, HSPH1, YWHAQ, HSP90AA1, U2AF1, PSMD8, PMPCA, U2AF2, CSNK2A2, NDUFA13, YWHAE, SLC25A6, RUVBL1, DNM1L, HK1, NMT1, YWHAG, TOMM40, DYNLL1, AFG3L2, BAX, NPEPPS, MTCH2, TOMM22, ACTL6A, TOMM70, PSMB7, DNAJA1, SAE1, TOMM34
NLS-bearing protein import into nucleus	9.28123e-07	GO:0006607	10	1.56348	22	IPO5, KPNB1, KPNA6, IPO4, KPNA3, RANBP2, TNPO1, KPNA2, KPNA1, KPNA4
positive regulation of telomere maintenance via telomerase	9.32523e-07	GO:0032212	12	2.27415	32	CCT3, CCT7, MAPK1, CCT6A, CCT5, TCP1, MAPK3, CCT4, DKC1, CCT8, HNRNPA1, CCT2
nucleoside phosphate biosynthetic process	9.60709e-07	GO:1901293	46	21.6755	305	AK2, TYMS, COASY, IMPDH2, ATP5A1, ATP5F1, PRPS1, ATIC, ACOT7, DHFR, GMPS, GART, ATP5L, SHMT1, ADSS, PKM, ATP5O, CTPS1, CMPK1, PRPSAP2, GNAI3, CAP1, RRM1, ADNP, STOML2, SLC25A13, CAD, ATP5H, PPAT, PAICS, MTHFD1, ATP5B, PNP, NAMPT, NME3, ATP5J2, AK1, VCP, UMPS, APRT, HPRT1, KARS, ATP5C1, ADSL, ALDOA, GNAI2
immune response-activating signal transduction	9.79188e-07	GO:0002757	61	32.1934	453	PSMD3, EZR, HSP90AB1, PSMB2, PSMD14, RPS6KA3, PSMD11, PSMB5, PSMA4, PAK2, RPS27A, PSMA7, SKP1, ACTR3, HSP90AA1, PSMD8, RAC1, ACTR2, PSMC3, MAPK1, CYFIP2, ARPC4, UBE2V1, PSMB4, ARPC1A, HMGB1, STOML2, PSMD7, HSPA1A, PSMD10, PSMF1, PSMD13, BAX, ACTG1, PSMC5, PSMD1, MAPK3, PSMD2, C1QBP, ARPC2, HSPD1, PSMB7, PSMC2, PLCG1, PSMA1, PSMC1, CUL1, PHPT1, PSMC4, PSMA2, PSMD12, PSMB3, PSMD6, PSMA3, ARPC1B, PS…
glycolytic process through glucose-6-phosphate	1.00495e-06	GO:0061620	11	1.91881	27	ENO1, TPI1, PFKL, PFKP, PKM, GPI, HK1, PGK1, GALK1, ALDOC, ALDOA
glycolytic process through fructose-6-phosphate	1.00495e-06	GO:0061615	11	1.91881	27	ENO1, TPI1, PFKL, PFKP, PKM, GPI, HK1, PGK1, GALK1, ALDOC, ALDOA
single-organism nuclear import	1.01929e-06	GO:1902593	42	19.046	268	SPTBN1, IPO5, IPO7, HSP90AB1, TRIM28, IPO9, PHB2, NUP133, TNPO3, HSP90AA1, KPNB1, KPNA6, PDIA3, IPO4, MAPK1, NUP93, NUP98, G3BP2, KPNA3, LMNA, PSMD10, POLA2, RAE1, RANBP2, TNPO1, KPNA2, NUP155, NUP205, NUP107, MAPK3, EMD, RPL23, RAN, FLNA, CDK1, NOP58, JUP, KPNA1, PARP1, NUP85, KPNA4, IPO8
protein import into nucleus	1.01929e-06	GO:0006606	42	19.046	268	SPTBN1, IPO5, IPO7, HSP90AB1, TRIM28, IPO9, PHB2, NUP133, TNPO3, HSP90AA1, KPNB1, KPNA6, PDIA3, IPO4, MAPK1, NUP93, NUP98, G3BP2, KPNA3, LMNA, PSMD10, POLA2, RAE1, RANBP2, TNPO1, KPNA2, NUP155, NUP205, NUP107, MAPK3, EMD, RPL23, RAN, FLNA, CDK1, NOP58, JUP, KPNA1, PARP1, NUP85, KPNA4, IPO8
protein targeting to nucleus	1.01929e-06	GO:0044744	42	19.046	268	SPTBN1, IPO5, IPO7, HSP90AB1, TRIM28, IPO9, PHB2, NUP133, TNPO3, HSP90AA1, KPNB1, KPNA6, PDIA3, IPO4, MAPK1, NUP93, NUP98, G3BP2, KPNA3, LMNA, PSMD10, POLA2, RAE1, RANBP2, TNPO1, KPNA2, NUP155, NUP205, NUP107, MAPK3, EMD, RPL23, RAN, FLNA, CDK1, NOP58, JUP, KPNA1, PARP1, NUP85, KPNA4, IPO8
organic cyclic compound biosynthetic process	1.14866e-06	GO:1901362	385	314.046	4419	RBMX, ANXA3, AK2, XPO1, EIF2A, DNAJA3, RPL13, RPL13A, TYMS, PPP2R1A, RPS14, SLIRP, EZR, FUBP3, YWHAB, COASY, SEH1L, TRIM28, RPL26, PRMT5, IMPDH2, SRSF2, USP9X, HNRNPD, ATP5A1, SRSF7, SRSF5, RPS6KA3, UGP2, CNOT9, TRIM25, CNOT1, HNRNPDL, AAAS, DDX3X, HMGB2, ATP5F1, CSTF1, PSPC1, SMARCA4, PRPS1, ATIC, MTDH, RPL10, SAFB, HSPH1, ENO1, EEF1A1, GFPT1, PHB2, DNM2, CCT3, SUPT5H, RPS24, CPSF7, NUP153, SUPT…
regulation of Wnt signaling pathway	1.15736e-06	GO:0030111	46	21.8176	307	PSMD3, PPP2R1A, PSMB2, G3BP1, PSMD14, PSMD11, PSMB5, SMARCA4, PSMA4, CTNND1, RPS27A, PSMA7, PSMD8, PPP1CA, CUL3, PSMC3, PSMB4, CSNK1A1, PSMD7, PSMD10, PSMF1, ILK, CSNK2A1, PSMD13, PSMC5, PSMD1, PSMD2, CDC73, EMD, RACK1, VPS35, PSMB7, PSMC2, JUP, PSMA1, PSMC1, PSMC4, PSMA2, CCAR2, PSMD12, PSMB3, PSMD6, PSMA3, PSMB1, PSMC6, PSME3
single-organism carbohydrate catabolic process	1.24204e-06	GO:0044724	27	9.80728	138	LDHA, ENO1, TPI1, SORD, PFKL, PFKP, PYGB, PKM, PPP1CB, PPP1CA, GPI, PRKAG1, HMGB1, HK1, EIF6, GPD2, PGK1, GALK1, TIGAR, PGM2, PYGL, ALDOC, PGM1, ABHD10, ADPGK, OGDH, ALDOA
mitochondrial ATP synthesis coupled electron transport	1.26608e-06	GO:0042775	19	5.47218	77	NDUFC2, NDUFA9, CYC1, UQCRC2, COX4I1, NDUFA13, NDUFB4, COX6C, DLD, NDUFA4, NDUFS2, NDUFA10, NDUFV1, CYCS, UQCR10, UQCRC1, UQCRFS1, PMPCB, NDUFS1
IMP metabolic process	1.29631e-06	GO:0046040	8	0.994941	14	ATIC, GART, ADSS, PPAT, PAICS, HPRT1, NT5C2, ADSL
positive regulation of telomere maintenance via telomere lengthening	1.3709e-06	GO:1904358	12	2.34522	33	CCT3, CCT7, MAPK1, CCT6A, CCT5, TCP1, MAPK3, CCT4, DKC1, CCT8, HNRNPA1, CCT2
regulation of protein stability	1.37384e-06	GO:0031647	36	15.3505	216	HSP90AB1, NCLN, PHB2, CCT3, HCFC1, HSP90AA1, PSMD8, CCT7, ASPH, PFN1, MAPK1, CDC37, CCT6A, PHB, USP7, CCT5, TCP1, PRKDC, HSPA1A, PPIB, CLU, KHDRBS1, BAG6, TELO2, NAA15, CDC73, CCT4, HSPD1, VPS35, FLNA, NOMO2, LAMP2, CCAR2, CCT8, ISOC2, CCT2
positive regulation of innate immune response	1.53615e-06	GO:0045089	44	20.6806	291	PSMD3, PSMB2, PSMD14, RPS6KA3, PSMD11, HMGB2, PSMB5, PSMA4, PAK2, RPS27A, PSMA7, SKP1, PSMD8, PSMC3, UBE2V1, PSMB4, AP1G1, HMGB1, PSMD7, HSPA1A, PSMD10, PSMF1, PSMD13, PSMC5, PSMD1, RPS19, PSMD2, C1QBP, HSPD1, PSMB7, PSMC2, PSMA1, PSMC1, CUL1, PSMC4, PSMA2, PSMD12, PSMB3, PSMD6, PSMA3, PSMB1, PSMC6, HSP90B1, PSME3
regulation of defense response to virus by virus	1.55002e-06	GO:0050690	11	1.98988	28	PAK2, RAC1, ATP6V1H, AP2B1, AP1M1, AP2M1, AP1G1, AP1B1, AP2A2, AP2A1, EIF2AK2
ATP synthesis coupled electron transport	1.56348e-06	GO:0042773	19	5.54324	78	NDUFC2, NDUFA9, CYC1, UQCRC2, COX4I1, NDUFA13, NDUFB4, COX6C, DLD, NDUFA4, NDUFS2, NDUFA10, NDUFV1, CYCS, UQCR10, UQCRC1, UQCRFS1, PMPCB, NDUFS1
ribonucleoside triphosphate biosynthetic process	1.76898e-06	GO:0009201	16	4.1219	58	ATP5A1, ATP5F1, ATP5L, PKM, ATP5O, CTPS1, STOML2, SLC25A13, CAD, ATP5H, ATP5B, NME3, ATP5J2, VCP, ATP5C1, ALDOA
positive regulation of DNA biosynthetic process	1.76898e-06	GO:2000573	16	4.1219	58	CCT3, CCT7, MAPK1, CCT6A, RFC5, RFC2, CCT5, TCP1, RFC3, DDX39B, MAPK3, CCT4, DKC1, CCT8, HNRNPA1, CCT2
CRD-mediated mRNA stabilization	1.79855e-06	GO:0070934	5	0.355336	5	SYNCRIP, YBX1, IGF2BP1, DHX9, HNRNPU
viral translational termination-reinitiation	1.79855e-06	GO:0075525	5	0.355336	5	EIF3L, EIF3G, EIF3B, EIF3A, EIF3D
regulation of innate immune response	1.99891e-06	GO:0045088	50	25.0157	352	PSMD3, HSP90AB1, PSMB2, PTPN11, PSMD14, RPS6KA3, PSMD11, HMGB2, PSMB5, PSMA4, PAK2, RPS27A, PSMA7, SKP1, PSMD8, PSMC3, CDC37, UBE2V1, PSMB4, AP1G1, HMGB1, PSMD7, HSPA1A, PSMD10, PSMF1, PSMD13, PSMC5, PSMD1, RPS19, PSMD2, STAT1, C1QBP, PTPN1, HSPD1, PSMB7, PSMC2, PSMA1, PSMC1, CUL1, PSMC4, PSMA2, PSMD12, PSMB3, PSMD6, PSMA3, PSMB1, ADAR, PSMC6, HSP90B1, PSME3
protein stabilization	2.00451e-06	GO:0050821	25	8.8834	125	HSP90AB1, PHB2, CCT3, HCFC1, HSP90AA1, CCT7, PFN1, CDC37, CCT6A, PHB, USP7, CCT5, TCP1, HSPA1A, PPIB, CLU, BAG6, TELO2, NAA15, CCT4, HSPD1, FLNA, LAMP2, CCT8, CCT2
nucleobase-containing compound biosynthetic process	2.2693e-06	GO:0034654	370	301.965	4249	RBMX, ANXA3, AK2, XPO1, EIF2A, DNAJA3, RPL13, RPL13A, TYMS, PPP2R1A, RPS14, SLIRP, EZR, FUBP3, YWHAB, COASY, SEH1L, TRIM28, RPL26, PRMT5, IMPDH2, SRSF2, USP9X, HNRNPD, ATP5A1, SRSF7, SRSF5, RPS6KA3, UGP2, CNOT9, TRIM25, CNOT1, HNRNPDL, AAAS, DDX3X, HMGB2, ATP5F1, CSTF1, PSPC1, SMARCA4, PRPS1, ATIC, MTDH, RPL10, SAFB, HSPH1, ENO1, EEF1A1, GFPT1, PHB2, DNM2, CCT3, SUPT5H, RPS24, CPSF7, NUP153, SUPT…
regulation of protein complex assembly	2.35972e-06	GO:0043254	50	25.1578	354	SPTBN1, SPTBN2, CAPZB, PTPN11, NCLN, DDX3X, MAPRE1, ACTR3, HCFC1, HSP90AA1, RAC1, ACTR2, CAND1, PFN1, TWF1, PSMC3, BCLAF1, ARPC4, GMFB, ARPC1A, HMGB1, CORO1B, DNM1L, SEC24B, MSN, CAPZA2, RPA1, CLASP1, NAPA, CLU, BAX, PSMC5, RACK1, ARPC2, ADD1, CUL4B, VCP, PSMC2, PSMC1, PSMC4, IDE, FSCN1, PARP1, SPTAN1, EIF2AK2, RPS3, ARPC1B, PSMC6, SETX, ARPC3
alpha-amino acid metabolic process	2.36228e-06	GO:1901605	33	13.787	194	GLUD1, GFPT1, DHFR, FAH, GMPS, MPST, GART, SHMT1, ASS1, ADSS, CTPS1, EIF4A3, GLS, OAT, ASNS, SHMT2, DLD, AHCY, CAD, AASDHPPT, PPAT, PHGDH, MTHFD1, GOT2, DNMT1, P4HA1, SARS, GGH, OGDH, GCDH, ALDH18A1, ALDH7A1, SMS
carbohydrate biosynthetic process	2.36228e-06	GO:0016051	33	13.787	194	UGP2, ENO1, GFPT1, TPI1, SORD, CLTC, RPS27A, MDH1, PGD, PPP1CB, PPP1CA, GYS1, SLC25A1, SLC25A11, GPI, NANS, SLC25A13, G6PD, GPD2, RANBP2, PGK1, WDR5, TALDO1, AP2A1, PGM2, GOT2, SLC25A10, SLC2A1, ALDOC, PGM1, MDH2, AKR1B1, ALDOA
IRE1-mediated unfolded protein response	2.40502e-06	GO:0036498	17	4.69044	66	SEC31A, GFPT1, SSR1, HYOU1, PDIA6, GOSR2, SRPRB, LMNA, HSPA1A, TMEM33, BAX, DCTN1, ADD1, PTPN1, TLN1, SEC61A1, SRPRA
transcription-coupled nucleotide-excision repair	2.42583e-06	GO:0006283	18	5.18791	73	RPS27A, PCNA, RFC5, USP7, RFC2, RFC3, RPA1, POLD1, POLR2B, CUL4B, COPS8, COPS6, GPS1, COPS2, POLR2H, PRPF19, COPS4, COPS3
regulation of translational elongation	2.46747e-06	GO:0006448	10	1.70561	24	AARS, EIF4A3, IARS2, EIF5A, LARS, RPS9, DTD1, RPS5, VARS, IARS
glutamine metabolic process	2.46747e-06	GO:0006541	10	1.70561	24	GLUD1, GFPT1, GMPS, CTPS1, GLS, ASNS, CAD, PPAT, PHGDH, GGH
establishment of protein localization to telomere	2.60418e-06	GO:0070200	8	1.06601	15	CCT7, CCT6A, CCT5, TCP1, CCT4, DKC1, CCT8, CCT2
nuclear pore organization	2.60418e-06	GO:0006999	8	1.06601	15	SEH1L, NUP153, NUP133, NUP93, NUP98, TMEM33, NUP205, NUP107
microtubule-based process	2.6194e-06	GO:0007017	72	41.3611	582	XPO1, PPP2R1A, EZR, TUBA1C, CFAP20, KIF5B, AP3M1, CKAP5, MAPRE1, EML4, NPM1, CNP, ACTR3, SLC16A1, ARL3, AP3B1, KPNB1, CDK2, ACTR2, UCHL1, TUBB4B, DOCK7, SLK, AP2B1, MAP4, CHD4, TBCE, TUBB3, AP2M1, TUBB2A, AP3D1, KIF11, TUBB4A, MYH9, LMNA, TUBGCP2, CHORDC1, KTN1, DIAPH1, NTMT1, DYNC1I2, DYNC1H1, COPG1, CLASP1, DYNLL1, AP2A2, TUBG1, DCTN1, BICD2, RBM14, ARHGEF2, TUBB6, TUBB, AP2A1, RAB1A, LRPPRC, F…
protein modification by small protein conjugation	2.76319e-06	GO:0032446	98	61.6863	868	UBE2M, PSMD3, HSP90AB1, SEH1L, TRIM28, PSMB2, PSMD14, PSMD11, TRIM25, AAAS, HUWE1, PSMB5, PSMA4, BUB3, NUP153, UBA2, NUP133, HNRNPK, RPS27A, PSMA7, SKP1, CUL2, HSP90AA1, HECTD1, FANCI, PSMD8, MAD2L1, OTUB1, CDK2, UBR4, GNL3, CAND1, CUL3, UBE2I, PSMC3, HNRNPC, AIMP2, NUP93, DCUN1D5, NUP98, PCNA, NUP210, TCEB1, UBE2V1, PSMB4, SMC1A, CDK9, BLMH, PSMD7, STAG2, HSPA1A, PSMD10, RAE1, RPA1, PSMF1, RANBP…
negative regulation of cell cycle process	2.9865e-06	GO:0010948	35	15.2084	214	CNOT9, CNOT1, SMARCA4, BUB3, NPM1, MRE11A, RPS27A, FANCI, MAD2L1, CDK2, SLFN11, USP47, CDC5L, CSNK2A2, PCNA, SMC1A, CDK9, MSH2, PRKDC, STAG2, CDK4, CSNK2A1, BAX, RPS27L, RBM14, DDX39B, CDC73, CDK1, GIGYF2, VPS4A, DYNC1LI1, PRPF19, SMC3, CARM1, PRMT1
coenzyme biosynthetic process	3.05662e-06	GO:0009108	26	9.66514	136	PDHA1, HSD17B12, COASY, AGK, ATIC, ACOT7, DHFR, NDUFA9, MAT2B, GART, ACSL3, ACACA, FASN, SLC25A1, DLAT, ACOT9, ACSL4, DLD, ACLY, MAT2A, MTHFD1, PNP, NAMPT, PDK3, PDHB, GCDH
Wnt signaling pathway	3.10786e-06	GO:0016055	61	33.3305	469	PSMD3, PPP2R1A, PSMB2, G3BP1, PSMD14, PSMD11, DDX3X, PSMB5, SMARCA4, PSMA4, CTNND1, CLTC, VPS26A, RPS27A, PSMA7, SKP1, PSMD8, RAC1, PPP1CA, PFN1, CUL3, PSMC3, AP2B1, CSNK2A2, PSMB4, AP2M1, WDR61, CSNK1A1, PSMD7, PSMD10, PSMF1, ILK, CSNK2A1, AP2A2, PSMD13, PSMC5, PSMD1, PSMD2, CDC73, EMD, RACK1, VPS35, AP2A1, PSMB7, PSMC2, JUP, PSMA1, PSMC1, CUL1, PSMC4, PSMA2, VPS29, CCAR2, PSMD12, PSMB3, PSMD6, …
protein import into nucleus, docking	3.1453e-06	GO:0000059	6	0.568538	8	IPO5, KPNB1, IPO4, NUP98, TNPO1, NUP205
cell-cell signaling by wnt	3.33127e-06	GO:0198738	61	33.4016	470	PSMD3, PPP2R1A, PSMB2, G3BP1, PSMD14, PSMD11, DDX3X, PSMB5, SMARCA4, PSMA4, CTNND1, CLTC, VPS26A, RPS27A, PSMA7, SKP1, PSMD8, RAC1, PPP1CA, PFN1, CUL3, PSMC3, AP2B1, CSNK2A2, PSMB4, AP2M1, WDR61, CSNK1A1, PSMD7, PSMD10, PSMF1, ILK, CSNK2A1, AP2A2, PSMD13, PSMC5, PSMD1, PSMD2, CDC73, EMD, RACK1, VPS35, AP2A1, PSMB7, PSMC2, JUP, PSMA1, PSMC1, CUL1, PSMC4, PSMA2, VPS29, CCAR2, PSMD12, PSMB3, PSMD6, …
cellular response to chemical stimulus	3.46411e-06	GO:0070887	239	182.856	2573	RBMX, SPTBN2, IPO5, UBE2M, RPL13A, PSMD3, ATP6V1B2, EZR, TXNL1, HSP90AB1, PSMB2, IMPDH2, SEC31A, PTPN11, USP9X, HNRNPD, SRSF5, PSMD14, GSTP1, HNRNPH1, AARS, PSMD11, CNOT9, TRIM25, CNOT1, DDX3X, HMGB2, PSMB5, SMARCA4, RAB10, MTDH, SAFB, HSPH1, EEF1A1, GFPT1, PHB2, PSMA4, SULT1A1, DNM2, NPM1, DHFR, ATP6V1A, SFPQ, BYSL, LEMD3, ZC3HAV1, HNRNPK, PAK2, RPS27A, PSMA7, SYNCRIP, SSR1, CUL2, PNPT1, HYOU1, …
endomembrane system organization	3.73971e-06	GO:0010256	66	37.2392	524	SPTBN1, PPP2R1A, EZR, SEH1L, PRMT5, KIF5B, AAAS, RAB10, VTA1, DNM2, NUP153, CCDC47, NUP133, CLTC, BSG, MYOF, GOLGB1, ACSL3, ARL1, RAC1, TMED10, NSF, RER1, ANXA2, MAPK1, NUP93, NUP98, NUP210, AP2M1, AP3D1, LMNA, RAB5B, MYH10, CSNK1A1, RAE1, TMEM33, CLASP1, RANBP2, VAPA, EPB41L3, KRT18, CLU, BAG6, TARDBP, NUP155, NUP205, NUP107, SURF4, MAPK3, ATP2A2, EMD, RACK1, RAB1A, CDK1, JUP, PDCD6IP, SEC61A1, …
carbohydrate catabolic process	3.8463e-06	GO:0016052	27	10.3758	146	LDHA, ENO1, TPI1, SORD, PFKL, PFKP, PYGB, PKM, PPP1CB, PPP1CA, GPI, PRKAG1, HMGB1, HK1, EIF6, GPD2, PGK1, GALK1, TIGAR, PGM2, PYGL, ALDOC, PGM1, ABHD10, ADPGK, OGDH, ALDOA
DNA damage response, detection of DNA damage	3.96018e-06	GO:0042769	12	2.55842	36	RPS27A, PCNA, RFC5, MRPS9, RFC2, RFC3, RPA1, POLD1, CUL4B, DNAJA1, PARP1, RPS3
carbohydrate derivative metabolic process	3.98374e-06	GO:1901135	127	85.9203	1209	LDHA, AK2, RNASEH2B, NDUFC2, TYMS, ATP6V1B2, COASY, IMPDH2, ATP5A1, UGP2, ATP5F1, PRPS1, ATIC, ENO1, GFPT1, SULT1A1, TPI1, ACOT7, GMPS, ATP6V1A, NDUFA9, SORD, PFKL, PFKP, CLTC, CYC1, GART, MOGS, ATP5L, SHMT1, ADSS, PGD, AKR7A2, PKM, RAB1B, ATP5O, CTPS1, GNPDA1, RPN2, UAP1, DAD1, PGLS, CMPK1, DPM1, UQCRC2, COX4I1, NDUFA13, MGEA5, GNAI3, GPI, CHID1, CAP1, PRKAG1, RRM1, NDUFB4, DNM1L, HK1, ADNP, STO…
ATP biosynthetic process	4.02743e-06	GO:0006754	13	2.98482	42	ATP5A1, ATP5F1, ATP5L, PKM, ATP5O, STOML2, SLC25A13, ATP5H, ATP5B, ATP5J2, VCP, ATP5C1, ALDOA
hexose biosynthetic process	4.23477e-06	GO:0019319	19	5.89858	83	ENO1, TPI1, SORD, MDH1, SLC25A1, SLC25A11, GPI, SLC25A13, GPD2, RANBP2, PGK1, WDR5, GOT2, SLC25A10, ALDOC, PGM1, MDH2, AKR1B1, ALDOA
regulation of transferase activity	4.25474e-06	GO:0051338	102	65.524	922	PSMD3, PPP2R1A, HSP90AB1, PSMB2, PTPN11, PSMD14, GSTP1, PSMD11, PSMB5, CAB39, HSPH1, PSMA4, SPAG9, BUB3, NPM1, EEF1A2, MRE11A, PAK2, RPS27A, PSMA7, SKP1, PSMD8, MAD2L1, CDK2, RAC1, UCHL1, CUL3, UBE2I, PSMC3, IQGAP1, MAPK1, RPS2, DCUN1D5, CDC37, GMFB, PSMB4, RFC5, PRKAG1, CORO1C, HMGB1, ADNP, YWHAG, CHORDC1, RFC2, TCP1, PSMD7, PSMD10, RFC3, HACD3, CDK4, PDCD4, PSMF1, RANBP2, ILK, CLU, PSMD13, ZNF6…
heterocycle biosynthetic process	4.27085e-06	GO:0018130	372	305.731	4302	RBMX, ANXA3, AK2, XPO1, EIF2A, DNAJA3, RPL13, RPL13A, TYMS, PPP2R1A, RPS14, SLIRP, EZR, FUBP3, YWHAB, COASY, SEH1L, TRIM28, RPL26, PRMT5, IMPDH2, SRSF2, USP9X, HNRNPD, ATP5A1, SRSF7, SRSF5, RPS6KA3, UGP2, CNOT9, TRIM25, CNOT1, HNRNPDL, AAAS, DDX3X, HMGB2, ATP5F1, CSTF1, PSPC1, SMARCA4, PRPS1, ATIC, MTDH, RPL10, SAFB, HSPH1, ENO1, EEF1A1, GFPT1, PHB2, DNM2, CCT3, SUPT5H, RPS24, CPSF7, NUP153, SUPT…
nucleic acid phosphodiester bond hydrolysis	4.3112e-06	GO:0090305	40	18.7617	264	PARN, RNASEH2B, POP1, G3BP1, CNOT1, HMGB2, CSTF1, TSN, MRE11A, RPS27A, PNPT1, EXOSC2, CPSF2, KPNB1, FEN1, PCNA, RFC5, AIFM1, HMGB1, RFC2, RPSA, HSPA1A, RFC3, RPA1, BAX, POLD1, CSTF3, RAD50, DIS3, CUL4B, POLA1, DDX1, NCBP1, KPNA1, SND1, PARP1, APEX1, MRPL44, ELAC2, XRN2
ribose phosphate biosynthetic process	4.50059e-06	GO:0046390	39	18.1221	255	AK2, COASY, IMPDH2, ATP5A1, ATP5F1, PRPS1, ATIC, ACOT7, GMPS, GART, ATP5L, ADSS, PKM, ATP5O, CTPS1, CMPK1, GNAI3, CAP1, ADNP, STOML2, SLC25A13, G6PD, CAD, ATP5H, PPAT, PAICS, ATP5B, NME3, ATP5J2, PYGL, AK1, VCP, UMPS, APRT, HPRT1, ATP5C1, ADSL, ALDOA, GNAI2
thioester biosynthetic process	4.61399e-06	GO:0035384	16	4.40617	62	PDHA1, HSD17B12, AGK, ACOT7, ACSL3, ACACA, FASN, SLC25A1, DLAT, ACOT9, ACSL4, DLD, ACLY, PDK3, PDHB, GCDH
acyl-CoA biosynthetic process	4.61399e-06	GO:0071616	16	4.40617	62	PDHA1, HSD17B12, AGK, ACOT7, ACSL3, ACACA, FASN, SLC25A1, DLAT, ACOT9, ACSL4, DLD, ACLY, PDK3, PDHB, GCDH
purine nucleoside diphosphate metabolic process	4.65153e-06	GO:0009135	20	6.46712	91	LDHA, AK2, ENO1, TPI1, PFKL, PFKP, PKM, GPI, PRKAG1, HK1, EIF6, PGK1, GALK1, TIGAR, ALDOC, AK1, PGM1, ADPGK, OGDH, ALDOA
purine ribonucleoside diphosphate metabolic process	4.65153e-06	GO:0009179	20	6.46712	91	LDHA, AK2, ENO1, TPI1, PFKL, PFKP, PKM, GPI, PRKAG1, HK1, EIF6, PGK1, GALK1, TIGAR, ALDOC, AK1, PGM1, ADPGK, OGDH, ALDOA
pore complex assembly	4.88301e-06	GO:0046931	8	1.13708	16	CCT3, NUP153, NUP93, NUP98, TMEM33, NUP205, NUP107, CCT8
regulation of translational fidelity	4.88301e-06	GO:0006450	8	1.13708	16	AARS, IARS2, LARS, RPS9, DTD1, RPS5, VARS, IARS
glucose catabolic process	5.01089e-06	GO:0006007	11	2.20308	31	ENO1, TPI1, PFKL, PFKP, PKM, GPI, HK1, PGK1, TIGAR, ALDOC, ALDOA
hydrogen ion transmembrane transport	5.06576e-06	GO:1902600	22	7.60419	107	ATP6V1B2, ATP5A1, ATP5F1, ATP6V1A, ATP5L, ATP5O, ATP6V1H, COX4I1, STOML2, COX6C, ATP5H, NDUFA4, ATP5B, ATP6V1C1, ATP5J2, UQCR10, UQCRC1, ATP6AP1, UQCRFS1, NNT, ATP1A1, ATP5C1
cofactor biosynthetic process	5.06727e-06	GO:0051188	30	12.3657	174	PDHA1, HSD17B12, COASY, AGK, ATIC, ACOT7, DHFR, NDUFA9, CIAPIN1, MAT2B, GART, ACSL3, CPOX, ACACA, FASN, SLC25A1, NUBP2, DLAT, ACOT9, ACSL4, DLD, ACLY, MAT2A, MTHFD1, PNP, NAMPT, PDK3, PDHB, UROD, GCDH
tricarboxylic acid metabolic process	5.18646e-06	GO:0072350	7	0.852807	12	GLUD1, IDH2, IDH3B, ACO2, IDH1, ACLY, ACO1
vesicle-mediated transport	5.2708e-06	GO:0016192	144	100.702	1417	SPTBN1, ANXA3, ARF5, SPTBN2, GAPVD1, MYO1B, EZR, HSP90AB1, SEC31A, AP3M1, ARF3, COPB2, DPYSL2, RAB10, VTA1, HSPH1, DNM2, SPAG9, SCRIB, SEC13, HNRNPK, COPB1, CLTC, VPS26A, COPG2, TBC1D15, SEC24A, HYOU1, WDR1, ACTR3, GOLGB1, CPNE3, HSP90AA1, ARL3, PDIA6, AP3B1, SEC24C, RAB1B, RAB7A, ARL1, ACTN4, RAC1, TMED10, ACTR2, ATP6V1H, NSF, CUL3, RER1, YKT6, ANXA2, COPE, MAPK1, AP2B1, ANXA1, EXOC2, CYFIP2, AP…
activation of immune response	5.54858e-06	GO:0002253	64	36.1732	509	PSMD3, EZR, HSP90AB1, PSMB2, PSMD14, RPS6KA3, PSMD11, PSMB5, PHB2, PSMA4, PAK2, RPS27A, PSMA7, SKP1, ACTR3, HSP90AA1, PSMD8, RAC1, ACTR2, PSMC3, MAPK1, CYFIP2, ARPC4, UBE2V1, PSMB4, PHB, ARPC1A, HMGB1, STOML2, PSMD7, HSPA1A, PSMD10, PSMF1, CLU, PSMD13, BAX, ACTG1, PSMC5, PSMD1, MAPK3, PSMD2, C1QBP, ARPC2, HSPD1, PSMB7, PSMC2, PLCG1, PSMA1, PSMC1, CUL1, PHPT1, PSMC4, PSMA2, PSMD12, PSMB3, PSMD6, P…
aromatic compound biosynthetic process	5.77633e-06	GO:0019438	372	306.655	4315	RBMX, ANXA3, AK2, XPO1, EIF2A, DNAJA3, RPL13, RPL13A, TYMS, PPP2R1A, RPS14, SLIRP, EZR, FUBP3, YWHAB, COASY, SEH1L, TRIM28, RPL26, PRMT5, IMPDH2, SRSF2, USP9X, HNRNPD, ATP5A1, SRSF7, SRSF5, RPS6KA3, UGP2, CNOT9, TRIM25, CNOT1, HNRNPDL, AAAS, DDX3X, HMGB2, ATP5F1, CSTF1, PSPC1, SMARCA4, PRPS1, ATIC, MTDH, RPL10, SAFB, HSPH1, ENO1, EEF1A1, GFPT1, PHB2, DNM2, CCT3, SUPT5H, RPS24, CPSF7, NUP153, SUPT…
NADH regeneration	5.86274e-06	GO:0006735	10	1.84775	26	ENO1, TPI1, PFKL, PFKP, PKM, GPI, HK1, PGK1, ALDOC, ALDOA
canonical glycolysis	5.86274e-06	GO:0061621	10	1.84775	26	ENO1, TPI1, PFKL, PFKP, PKM, GPI, HK1, PGK1, ALDOC, ALDOA
glucose catabolic process to pyruvate	5.86274e-06	GO:0061718	10	1.84775	26	ENO1, TPI1, PFKL, PFKP, PKM, GPI, HK1, PGK1, ALDOC, ALDOA
ribonucleoside diphosphate metabolic process	6.60662e-06	GO:0009185	20	6.60925	93	LDHA, AK2, ENO1, TPI1, PFKL, PFKP, PKM, GPI, PRKAG1, HK1, EIF6, PGK1, GALK1, TIGAR, ALDOC, AK1, PGM1, ADPGK, OGDH, ALDOA
mitochondrial membrane organization	6.60662e-06	GO:0007006	20	6.60925	93	TIMM50, YWHAB, CNP, YWHAQ, HSP90AA1, NDUFA13, YWHAE, NMT1, YWHAG, HSPA1A, SLC25A5, DYNLL1, AFG3L2, BAX, MTCH2, TOMM22, RHOT2, LETM1, ACAA2, IMMT
mitotic nuclear division	7.03279e-06	GO:0007067	56	30.4878	429	PPP2R1A, SEH1L, PRMT5, USP9X, CKAP5, NAA50, SMARCA4, PHB2, BUB3, MAPRE1, NUP153, PDS5A, EML4, CLTC, SEPT2, KPNB1, MAD2L1, CDK2, CUL3, UBE2I, NCAPD2, CSNK2A2, CLTCL1, TUBB3, KIF11, RUVBL1, SMC2, SMC1A, TUBGCP2, CSNK1A1, STAG2, NCAPG, CLASP1, CSNK2A1, DCTN1, MAPRE2, PPP5C, RCC2, ARHGEF2, DCTN2, RPS6, RAN, FLNA, CDK1, NSUN2, PDCD6IP, VPS4A, DYNC1LI1, NUMA1, RPS3, SMC3, SMC4, MCMBP, SEPT7, CDK13, PAF…
dicarboxylic acid metabolic process	7.37848e-06	GO:0043648	19	6.11178	86	GLUD1, IDH2, IDH3B, FH, ASS1, MDH1, ADSS, IDH1, GLS, OAT, SDHA, DLD, ACLY, SDHB, GOT2, MDH2, OGDH, ALDH18A1, ME2
hexose catabolic process	8.30252e-06	GO:0019320	14	3.62443	51	ENO1, TPI1, PFKL, PFKP, PKM, GPI, HK1, PGK1, GALK1, TIGAR, PGM2, ALDOC, PGM1, ALDOA
cullin deneddylation	8.86173e-06	GO:0010388	6	0.639605	9	COPS8, COPS6, GPS1, COPS2, COPS4, COPS3
endoplasmic reticulum unfolded protein response	8.91137e-06	GO:0030968	24	9.02554	127	SEC31A, AARS, GFPT1, SSR1, HYOU1, PDIA6, GOSR2, SRPRB, ASNS, LMNA, HSPA1A, TMEM33, BAX, DCTN1, RACK1, ADD1, PTPN1, VCP, TLN1, SEC61A1, EIF2S1, EIF2AK2, SRPRA, HSP90B1
positive regulation of mRNA metabolic process	9.42784e-06	GO:1903313	13	3.19802	45	RBMX, CNOT1, ZC3HAV1, PNPT1, PABPC1, UPF1, HSPA1A, SNRNP70, THRAP3, CDC73, NCBP1, PRPF19, HNRNPR
immune response-regulating signaling pathway	9.69883e-06	GO:0002764	61	34.5387	486	PSMD3, EZR, HSP90AB1, PSMB2, PSMD14, RPS6KA3, PSMD11, PSMB5, PSMA4, PAK2, RPS27A, PSMA7, SKP1, ACTR3, HSP90AA1, PSMD8, RAC1, ACTR2, PSMC3, MAPK1, CYFIP2, ARPC4, UBE2V1, PSMB4, ARPC1A, HMGB1, STOML2, PSMD7, HSPA1A, PSMD10, PSMF1, PSMD13, BAX, ACTG1, PSMC5, PSMD1, MAPK3, PSMD2, C1QBP, ARPC2, HSPD1, PSMB7, PSMC2, PLCG1, PSMA1, PSMC1, CUL1, PHPT1, PSMC4, PSMA2, PSMD12, PSMB3, PSMD6, PSMA3, ARPC1B, PS…
regulation of viral process	9.85647e-06	GO:0050792	48	25.0157	352	TRIM28, TRIM25, DDX3X, SMARCA4, SUPT5H, ZC3HAV1, MRE11A, PAK2, DDX5, MDH1, RAB7A, RAC1, PABPC1, ATP6V1H, SRPK1, PFN1, NUP93, AP2B1, AP1M1, SNRPB, AP2M1, SNRPD1, AP1G1, AP1B1, CDK9, CFL1, HACD3, PPIB, VAPA, AP2A2, PCBP2, FXR2, MRPS2, TARDBP, STAT1, C1QBP, POLR2B, AP2A1, STAU1, PPIA, EIF2S1, NELFB, VPS4A, POLR2H, EIF2AK2, ADAR, ILF3, LARP1
'de novo' IMP biosynthetic process	1.00274e-05	GO:0006189	5	0.426403	6	ATIC, GART, PPAT, PAICS, ADSL
transcription-dependent tethering of RNA polymerase II gene DNA at nuclear periphery	1.00274e-05	GO:0000972	5	0.426403	6	NUP133, NUP98, RAE1, NUP155, NUP107
telomere maintenance via recombination	1.00348e-05	GO:0000722	11	2.34522	33	FEN1, PCNA, RFC5, RFC2, POLA2, RFC3, RPA1, POLD1, RAD50, POLA1, PRIM2
cellular response to organic substance	1.02006e-05	GO:0071310	201	151.586	2133	RBMX, SPTBN2, IPO5, UBE2M, RPL13A, PSMD3, ATP6V1B2, EZR, HSP90AB1, PSMB2, IMPDH2, SEC31A, PTPN11, USP9X, HNRNPD, SRSF5, PSMD14, GSTP1, HNRNPH1, AARS, PSMD11, CNOT9, TRIM25, CNOT1, HMGB2, PSMB5, SMARCA4, RAB10, MTDH, SAFB, EEF1A1, GFPT1, PHB2, PSMA4, DNM2, NPM1, ATP6V1A, BYSL, LEMD3, ZC3HAV1, HNRNPK, PAK2, RPS27A, PSMA7, SYNCRIP, SSR1, PNPT1, HYOU1, DDX5, MYOF, ASS1, PRCP, SLC16A1, HCFC1, CPNE3, P…
purine ribonucleoside triphosphate biosynthetic process	1.06244e-05	GO:0009206	14	3.6955	52	ATP5A1, ATP5F1, ATP5L, PKM, ATP5O, STOML2, SLC25A13, ATP5H, ATP5B, NME3, ATP5J2, VCP, ATP5C1, ALDOA
apoptotic mitochondrial changes	1.09841e-05	GO:0008637	22	7.95953	112	TIMM50, YWHAB, YWHAQ, PPP2CB, YWHAE, DNM1L, LMNA, NMT1, YWHAG, HSPA1A, PSMD10, SLC25A5, DYNLL1, CLU, BAX, MTCH2, RHOT2, SLC25A4, CCAR2, NDUFS1, FAM162A, ACAA2
regulation of symbiosis, encompassing mutualism through parasitism	1.21041e-05	GO:0043903	50	26.6502	375	TRIM28, TRIM25, DDX3X, SMARCA4, SUPT5H, ZC3HAV1, MRE11A, PAK2, DDX5, MDH1, RAB7A, RAC1, PABPC1, ATP6V1H, SRPK1, PFN1, NUP93, AP2B1, EXOC2, AP1M1, SNRPB, AP2M1, SNRPD1, AP1G1, AP1B1, CDK9, CFL1, HACD3, PPIB, VAPA, AP2A2, PCBP2, FXR2, MRPS2, TARDBP, STAT1, C1QBP, POLR2B, AP2A1, STAU1, PPIA, EIF2S1, NELFB, VPS4A, POLR2H, EIF2AK2, OSBP, ADAR, ILF3, LARP1
nitrogen compound transport	1.2135e-05	GO:0071705	81	50.2445	707	XPO1, SEH1L, GLUD1, SLC38A2, PTPN11, SRSF2, SRSF7, SRSF5, CKAP5, AAAS, XPO7, NUP153, NUP133, SRSF6, POLDIP3, SEC13, PFKL, PNPT1, HNRNPA3, SEPT2, SLC16A1, CPSF2, U2AF1, THOC2, C14orf166, ABCB7, SLC1A5, DDX19B, EIF4A3, NUP93, U2AF2, UPF1, ANXA1, SRSF1, NUP98, NUP210, IGF2BP3, OXCT1, SLC25A6, EIF5A, G3BP2, SLC25A13, RPSA, RAE1, SLC25A5, RANBP2, SRSF3, KHDRBS1, NOL6, TARDBP, NUP155, NUP205, SRSF11, N…
establishment of protein localization to mitochondrion	1.27249e-05	GO:0072655	30	12.9342	182	TIMM44, TIMM50, YWHAB, HUWE1, HSPH1, YWHAQ, HSP90AA1, U2AF1, PSMD8, PMPCA, U2AF2, CSNK2A2, NDUFA13, YWHAE, SLC25A6, RUVBL1, HK1, NMT1, YWHAG, TOMM40, DYNLL1, AFG3L2, BAX, NPEPPS, TOMM22, ACTL6A, TOMM70, PSMB7, SAE1, TOMM34
nucleoside diphosphate metabolic process	1.27383e-05	GO:0009132	22	8.0306	113	LDHA, AK2, ENO1, TPI1, PFKL, PFKP, PKM, CMPK1, GPI, PRKAG1, HK1, EIF6, PGK1, GALK1, NME3, TIGAR, ALDOC, AK1, PGM1, ADPGK, OGDH, ALDOA
cellular response to unfolded protein	1.34539e-05	GO:0034620	24	9.23874	130	SEC31A, AARS, GFPT1, SSR1, HYOU1, PDIA6, GOSR2, SRPRB, ASNS, LMNA, HSPA1A, TMEM33, BAX, DCTN1, RACK1, ADD1, PTPN1, VCP, TLN1, SEC61A1, EIF2S1, EIF2AK2, SRPRA, HSP90B1
purine nucleoside triphosphate biosynthetic process	1.35021e-05	GO:0009145	14	3.76656	53	ATP5A1, ATP5F1, ATP5L, PKM, ATP5O, STOML2, SLC25A13, ATP5H, ATP5B, NME3, ATP5J2, VCP, ATP5C1, ALDOA
regulation of proteolysis	1.44192e-05	GO:0030162	78	48.1125	677	PSMD3, HSP90AB1, PSMB2, PSMD14, RPS6KA3, PSMD11, DDX3X, PSMB5, PHB2, PSMA4, BUB3, PAK2, RPS27A, PSMA7, SKP1, PDCD6, PSMD8, MAD2L1, ASPH, PSMC3, USP47, CYFIP2, NDUFA13, GPI, YWHAE, PSMB4, PHB, AIFM1, HMGB1, MYH9, FN1, PICALM, CSNK1A1, PSMD7, PSMD10, ANP32B, PSMF1, CSNK2A1, CLU, PSMD13, SERPINB6, BAG6, BAX, PSMC5, RPS27L, PSMD1, PSMD2, C1QBP, RACK1, HSPD1, PSMB7, POR, PEBP1, CYCS, CDK1, VCP, PSMC2,…
establishment of protein localization to chromosome	1.47074e-05	GO:0070199	9	1.63455	23	CCT7, CCT6A, CCT5, TCP1, RUVBL2, CCT4, DKC1, CCT8, CCT2
nucleotide-excision repair, DNA damage recognition	1.47074e-05	GO:0000715	9	1.63455	23	RPS27A, CUL4B, COPS8, COPS6, GPS1, PARP1, COPS2, COPS4, COPS3
regulation of DNA biosynthetic process	1.74559e-05	GO:2000278	19	6.46712	91	CCT3, CCT7, HNRNPC, MAPK1, CCT6A, RFC5, RFC2, CCT5, TCP1, RFC3, NAT10, DDX39B, MAPK3, CCT4, DKC1, CCT8, HNRNPA1, HNRNPU, CCT2
ribonucleotide biosynthetic process	1.82688e-05	GO:0009260	37	17.8379	251	AK2, COASY, IMPDH2, ATP5A1, ATP5F1, PRPS1, ATIC, ACOT7, GMPS, GART, ATP5L, ADSS, PKM, ATP5O, CTPS1, CMPK1, GNAI3, CAP1, ADNP, STOML2, SLC25A13, CAD, ATP5H, PPAT, PAICS, ATP5B, NME3, ATP5J2, AK1, VCP, UMPS, APRT, HPRT1, ATP5C1, ADSL, ALDOA, GNAI2
canonical Wnt signaling pathway	1.83035e-05	GO:0060070	41	20.6095	290	PSMD3, PSMB2, G3BP1, PSMD14, PSMD11, PSMB5, PSMA4, CTNND1, RPS27A, PSMA7, PSMD8, PPP1CA, CUL3, PSMC3, PSMB4, CSNK1A1, PSMD7, PSMD10, PSMF1, ILK, PSMD13, PSMC5, PSMD1, PSMD2, EMD, VPS35, PSMB7, PSMC2, JUP, PSMA1, PSMC1, PSMC4, PSMA2, CCAR2, PSMD12, PSMB3, PSMD6, PSMA3, PSMB1, PSMC6, PSME3
negative regulation of cell cycle phase transition	1.92278e-05	GO:1901988	26	10.6601	150	CNOT9, CNOT1, SMARCA4, BUB3, NPM1, MRE11A, RPS27A, FANCI, MAD2L1, CDK2, SLFN11, USP47, CDC5L, CSNK2A2, PCNA, PRKDC, CSNK2A1, BAX, RPS27L, CDC73, CDK1, GIGYF2, DYNC1LI1, PRPF19, CARM1, PRMT1
mitochondrial electron transport, ubiquinol to cytochrome c	1.97938e-05	GO:0006122	7	0.994941	14	CYC1, UQCRC2, CYCS, UQCR10, UQCRC1, UQCRFS1, PMPCB
positive regulation of viral process	2.06636e-05	GO:0048524	20	7.10672	100	DDX3X, SMARCA4, SUPT5H, RAB7A, PABPC1, SRPK1, PFN1, CDK9, CFL1, HACD3, PPIB, VAPA, POLR2B, STAU1, PPIA, NELFB, VPS4A, POLR2H, ADAR, LARP1
protein deneddylation	2.08039e-05	GO:0000338	6	0.710672	10	COPS8, COPS6, GPS1, COPS2, COPS4, COPS3
single-organism catabolic process	2.09537e-05	GO:0044712	89	57.4223	808	LDHA, DECR1, HADHA, GLUD1, TRIM25, ENO1, CCDC47, CTSD, TPI1, CNP, FAH, SORD, PFKL, PFKP, MPST, BLVRA, PYGB, SHMT1, PKM, RAB7A, IDH1, PPP1CB, PPP1CA, ETFB, PSMC3, ESD, ALDH3A2, PEPD, GLS, ALDH1B1, GPI, OAT, PRKAG1, OXCT1, HMGB1, HSD17B10, HK1, DLD, EIF6, AHCY, HSD17B4, SGPL1, ETFA, STT3B, PPAT, GPD2, PGK1, BAG6, PSMC5, PNP, AKR1A1, GALK1, ABCD3, HADHB, RACK1, TIGAR, DTD1, PGM2, GOT2, PYGL, POR, AC…
protein homotetramerization	2.11783e-05	GO:0051289	15	4.40617	62	DECR1, NAXE, IMPDH2, GFPT1, PFKL, SHMT1, ACACA, GLS, HSD17B10, DNM1L, SHMT2, PPAT, IDE, HPRT1, ALDOA
positive regulation of DNA-templated transcription, initiation	2.20656e-05	GO:2000144	9	1.70561	24	CAND1, PSMC3, BCLAF1, PSMC5, PSMC2, PSMC1, PSMC4, PSMC6, SETX
ATP synthesis coupled proton transport	2.20656e-05	GO:0015986	9	1.70561	24	ATP5A1, ATP5F1, ATP5L, ATP5O, STOML2, ATP5H, ATP5B, ATP5J2, ATP5C1
energy coupled proton transport, down electrochemical gradient	2.20656e-05	GO:0015985	9	1.70561	24	ATP5A1, ATP5F1, ATP5L, ATP5O, STOML2, ATP5H, ATP5B, ATP5J2, ATP5C1
positive regulation of chromosome organization	2.37618e-05	GO:2001252	25	10.1626	143	TRIM28, CCT3, SFPQ, MRE11A, CCT7, GNL3, CUL3, MAPK1, CCT6A, WDR61, CDK9, CCT5, TCP1, MAPK3, RAD50, RUVBL2, CCT4, DKC1, DNMT1, CHTOP, CCT8, DHX36, HNRNPA1, CCT2, SART3
mitochondrial RNA catabolic process	2.53877e-05	GO:0000957	4	0.284269	4	SLIRP, PNPT1, LRPPRC, SUPV3L1
isocitrate metabolic process	2.53877e-05	GO:0006102	4	0.284269	4	IDH2, IDH3B, ACO2, IDH1
adenine transport	2.53877e-05	GO:0015853	4	0.284269	4	SLC25A6, SLC25A5, VDAC3, SLC25A4
regulation of mitochondrial RNA catabolic process	2.53877e-05	GO:0000960	4	0.284269	4	SLIRP, PNPT1, LRPPRC, SUPV3L1
positive regulation of viral genome replication	2.5509e-05	GO:0045070	10	2.13202	30	DDX3X, PABPC1, SRPK1, HACD3, PPIB, VAPA, STAU1, PPIA, ADAR, LARP1
DNA recombination	2.60368e-05	GO:0006310	37	18.1221	255	PSMD14, MSH6, HMGB2, TSN, SFPQ, MRE11A, FEN1, PCNA, RFC5, HMGB1, RUVBL1, TRIP13, MSH2, RFC2, PRKDC, POLA2, RFC3, RPA1, KPNA2, POLD1, ACTL6A, RBM14, RAD50, XRCC5, RUVBL2, HSPD1, POLA1, XRCC6, KPNA1, PARP1, RECQL, SUPV3L1, APEX1, ALYREF, NONO, PRIM2, SETX
positive regulation of cellular protein localization	2.67106e-05	GO:1903829	46	24.5182	345	SPTBN1, IPO5, EZR, YWHAB, HSP90AB1, TRIM28, KIF5B, HUWE1, CCT3, HNRNPK, YWHAQ, HSP90AA1, ACSL3, U2AF1, PSMD8, CCT7, GNL3, RER1, HNRNPM, U2AF2, CSNK2A2, CCT6A, YWHAE, RUVBL1, MSN, NMT1, YWHAG, CCT5, TCP1, ANP32B, TMEM30A, DYNLL1, NPEPPS, ACTL6A, EMD, RACK1, CCT4, FLNA, PSMB7, DKC1, CDK1, JUP, PARP1, SAE1, CCT8, CCT2
osteoblast differentiation	2.79764e-05	GO:0001649	32	14.782	208	RBMX, RSL1D1, GNAS, SNRNP200, CCDC47, CLTC, SYNCRIP, DDX5, FASN, RPS15, HNRNPC, PHB, LMNA, DDX21, HSD17B4, RPS11, ILK, ATP5B, RRBP1, RACK1, PSMC2, IARS, SND1, MYBBP1A, CLIC1, ATP6AP1, DHX9, ADAR, RRAS2, ALYREF, FBL, HNRNPU
regulation of chromosome organization	3.15238e-05	GO:0033044	38	18.9749	267	TRIM28, CCT3, BUB3, SFPQ, MRE11A, CCT7, MAD2L1, OTUB1, GNL3, CUL3, HNRNPC, MAPK1, CSNK2A2, CCT6A, WDR61, USP7, CDK9, CCT5, TCP1, CSNK2A1, NAT10, MAPK3, RAD50, XRCC5, RUVBL2, CCT4, DKC1, DNMT1, TRIP12, PARP1, DYNC1LI1, CHTOP, CCT8, DHX36, HNRNPA1, HNRNPU, CCT2, SART3
cellular aldehyde metabolic process	3.17395e-05	GO:0006081	15	4.5483	64	TPI1, PGD, AKR7A2, PGLS, ESD, ALDH3A2, GPI, G6PD, AKR1A1, TALDO1, TIGAR, PGM2, ADH5, ALDH7A1, ALDH9A1
positive regulation of viral life cycle	3.28263e-05	GO:1903902	18	6.18285	87	DDX3X, SMARCA4, SUPT5H, PABPC1, SRPK1, PFN1, CDK9, HACD3, PPIB, VAPA, POLR2B, STAU1, PPIA, NELFB, VPS4A, POLR2H, ADAR, LARP1
monosaccharide catabolic process	3.30605e-05	GO:0046365	14	4.05083	57	ENO1, TPI1, PFKL, PFKP, PKM, GPI, HK1, PGK1, GALK1, TIGAR, PGM2, ALDOC, PGM1, ALDOA
protein localization to cytoplasmic stress granule	3.34396e-05	GO:1903608	5	0.49747	7	SSB, DDX3X, YBX1, DDX1, DHX9
DNA strand elongation	3.52688e-05	GO:0022616	10	2.20308	31	MRE11A, FEN1, PCNA, POLA2, RFC3, POLD1, RAD50, POLA1, PARP1, PRIM2
regulation of DNA-templated transcription, initiation	3.52688e-05	GO:2000142	10	2.20308	31	CAND1, PSMC3, BCLAF1, HMGB1, PSMC5, PSMC2, PSMC1, PSMC4, PSMC6, SETX
macromolecular complex disassembly	3.67194e-05	GO:0032984	37	18.4064	259	SPTBN1, SPTBN2, CAPZB, KIF5B, GSPT1, SMARCA4, VTA1, SUPT16H, WDR1, MRPL47, PPP1CA, ASPH, TWF1, UPF1, MRPS34, ETF1, EIF5A, MRPS9, CAPZA2, CSNK1A1, CFL1, CLASP1, NAPA, MRPL4, ARHGEF2, DSTN, ADD1, MRPL45, VPS4A, MRPS23, SPTAN1, SMARCC1, MCTS1, MRPL44, MRPL37, SETX, MRPL13
cellular response to topologically incorrect protein	3.74987e-05	GO:0035967	24	9.80728	138	SEC31A, AARS, GFPT1, SSR1, HYOU1, PDIA6, GOSR2, SRPRB, ASNS, LMNA, HSPA1A, TMEM33, BAX, DCTN1, RACK1, ADD1, PTPN1, VCP, TLN1, SEC61A1, EIF2S1, EIF2AK2, SRPRA, HSP90B1
gluconeogenesis	3.76155e-05	GO:0006094	17	5.68538	80	ENO1, TPI1, MDH1, SLC25A1, SLC25A11, GPI, SLC25A13, GPD2, RANBP2, PGK1, WDR5, GOT2, SLC25A10, ALDOC, PGM1, MDH2, ALDOA
mitotic recombination	3.92123e-05	GO:0006312	12	3.12696	44	MRE11A, FEN1, PCNA, RFC5, RFC2, POLA2, RFC3, RPA1, POLD1, RAD50, POLA1, PRIM2
monocarboxylic acid metabolic process	4.04343e-05	GO:0032787	64	38.5184	542	LDHB, LDHA, PDHA1, DECR1, HADHA, HSD17B12, IDH2, ENO1, TPI1, ACOT7, SORD, PFKL, PFKP, BSG, SLC16A1, PGD, ACSL3, PKM, ACACA, FASN, IDH1, ETFB, DLAT, ALDH3A2, ANXA1, GPI, PRKAG1, ACSL4, HK1, DLD, EIF6, HSD17B4, SGPL1, ETFA, ACLY, AASDHPPT, HACD3, PGK1, PTGES3, AKR1A1, LYPLA2, GALK1, CBR1, MAPK3, ABCD3, HADHB, TIGAR, POR, ALDOC, ACAD9, PGM1, MCCC2, PCCB, LTA4H, PDK3, PDHB, ECHS1, ABHD10, ADPGK, ACOX…
cytosolic transport	4.0888e-05	GO:0016482	23	9.23874	130	EZR, SPAG9, CLTC, VPS26A, RAB7A, ARL1, ACTR2, YKT6, MAPK1, CLTCL1, GOSR2, AP1G1, MSN, DCTN1, SURF4, MAPK3, VPS35, AP2A1, VPS29, RAB9A, LMAN1, SRSF10, RAB6A
negative regulation of mitotic cell cycle phase transition	4.23263e-05	GO:1901991	24	9.87834	139	CNOT9, CNOT1, SMARCA4, BUB3, NPM1, MRE11A, RPS27A, FANCI, MAD2L1, CDK2, SLFN11, USP47, CSNK2A2, PCNA, PRKDC, CSNK2A1, BAX, RPS27L, CDC73, CDK1, GIGYF2, DYNC1LI1, CARM1, PRMT1
nuclear pore complex assembly	4.30582e-05	GO:0051292	6	0.781739	11	NUP153, NUP93, NUP98, TMEM33, NUP205, NUP107
IMP biosynthetic process	4.30582e-05	GO:0006188	6	0.781739	11	ATIC, GART, PPAT, PAICS, HPRT1, ADSL
viral genome replication	4.46819e-05	GO:0019079	19	6.89352	97	DDX3X, SUPT5H, CTBP2, ZC3HAV1, DDX5, PABPC1, SRPK1, DEK, HACD3, PPIB, VAPA, PCBP2, STAU1, PPIA, VCP, EIF2AK2, ADAR, ILF3, LARP1
nuclear division	4.53246e-05	GO:0000280	65	39.4423	555	PPP2R1A, SEH1L, PRMT5, USP9X, CKAP5, MSH6, NAA50, SMARCA4, PHB2, BUB3, MAPRE1, NUP153, PDS5A, EML4, MRE11A, CLTC, SEPT2, ACTR3, KPNB1, MAD2L1, CDK2, ACTR2, CUL3, UBE2I, NCAPD2, CSNK2A2, CLTCL1, TUBB3, KIF11, RUVBL1, SMC2, SMC1A, TRIP13, TUBGCP2, MSH2, CSNK1A1, STAG2, NCAPG, CLASP1, CSNK2A1, PSMD13, BAG6, DCTN1, MAPRE2, PPP5C, RAD50, RCC2, ARHGEF2, DCTN2, RPS6, RAN, FLNA, CDK1, NSUN2, PDCD6IP, VPS…
protein localization to chromosome, telomeric region	4.631e-05	GO:0070198	9	1.84775	26	CCT7, GNL3, CCT6A, CCT5, TCP1, CCT4, DKC1, CCT8, CCT2
purine-containing compound biosynthetic process	4.65373e-05	GO:0072522	36	17.9089	252	AK2, COASY, IMPDH2, ATP5A1, ATP5F1, PRPS1, ATIC, ACOT7, GMPS, GART, ATP5L, SHMT1, ADSS, PKM, ATP5O, GNAI3, CAP1, ADNP, STOML2, SLC25A13, ATP5H, PPAT, PAICS, MTHFD1, ATP5B, PNP, NME3, ATP5J2, AK1, VCP, APRT, HPRT1, ATP5C1, ADSL, ALDOA, GNAI2
intrinsic apoptotic signaling pathway	4.76177e-05	GO:0097193	38	19.3303	272	MSH6, DDX3X, HSPH1, SFPQ, HNRNPK, CUL2, HYOU1, DDX5, SART1, CUL3, USP47, BCLAF1, STK24, NDUFA13, AIFM1, DNM1L, MSH2, PRKDC, HSPA1A, CLU, BAG6, ZNF622, BAX, ERP29, RPS27L, ARHGEF2, RACK1, PTPN1, CYCS, CUL1, STK25, DNAJC10, MYBBP1A, CCAR2, RPS3, TPT1, TRAP1, NONO
nucleotide-excision repair	5.39888e-05	GO:0006289	21	8.17273	115	RPS27A, UBE2I, PCNA, RFC5, HMGB1, USP7, RFC2, RFC3, RPA1, POLD1, POLR2B, CUL4B, COPS8, COPS6, GPS1, PARP1, COPS2, POLR2H, PRPF19, COPS4, COPS3
purine nucleobase metabolic process	5.59534e-05	GO:0006144	8	1.49241	21	PRPS1, GMPS, GART, SHMT1, PPAT, PAICS, APRT, HPRT1
protein tetramerization	5.91608e-05	GO:0051262	23	9.45194	133	DECR1, NAXE, IMPDH2, GFPT1, CPSF7, HIST1H4A, FH, PFKL, SHMT1, ACACA, ANXA2, GLS, RRM1, HSD17B10, DNM1L, SHMT2, PPAT, RPS19, XRCC6, IDE, HPRT1, ADSL, ALDOA
signal transduction by p53 class mediator	5.98268e-05	GO:0072331	36	18.1221	255	PRMT5, CNOT9, CNOT1, SUPT16H, NPM1, RBBP7, HNRNPK, MRE11A, RPS27A, DDX5, USP10, CDK2, CSNK2A2, PCNA, CHD4, RFC5, PRKAG1, MSH2, RFC2, PSMD10, RFC3, RPA1, CSNK2A1, BAG6, BAX, RPS27L, MYO6, RAD50, SSRP1, MTA2, CDK1, HDAC2, MYBBP1A, RBBP4, CARM1, PRMT1
thioester metabolic process	6.14825e-05	GO:0035383	18	6.46712	91	PDHA1, HSD17B12, AGK, ACOT7, ACSL3, ACACA, FASN, SLC25A1, DLAT, ACOT9, ACSL4, DLD, HSD17B4, ACLY, PDK3, PDHB, OGDH, GCDH
acyl-CoA metabolic process	6.14825e-05	GO:0006637	18	6.46712	91	PDHA1, HSD17B12, AGK, ACOT7, ACSL3, ACACA, FASN, SLC25A1, DLAT, ACOT9, ACSL4, DLD, HSD17B4, ACLY, PDK3, PDHB, OGDH, GCDH
cellular carbohydrate catabolic process	6.33998e-05	GO:0044275	12	3.26909	46	TPI1, SORD, PYGB, PPP1CB, PPP1CA, HMGB1, GPD2, TIGAR, PGM2, PYGL, PGM1, ABHD10
glucose 6-phosphate metabolic process	6.51033e-05	GO:0051156	9	1.91881	27	TPI1, PGD, PGLS, GPI, HK1, G6PD, TALDO1, TIGAR, PGM2
negative regulation of catalytic activity	6.6287e-05	GO:0043086	88	58.4172	822	ANXA3, IPO5, PSMD3, PPP2R1A, PSMB2, CNN3, PSMD14, RPS6KA3, GSTP1, PSMD11, DDX3X, PSMB5, PSMA4, BUB3, NPM1, PAK2, RPS27A, RNH1, PSMA7, PSMD8, MAD2L1, CDK2, UCHL1, CAND1, CUL3, PTPA, PSMC3, ANXA2, IQGAP1, PRPSAP2, USP47, ANXA1, GNAI3, GPI, GMFB, YWHAE, PSMB4, CORO1C, RRP1B, PICALM, YWHAG, CHORDC1, TIPRL, PSMD7, PSMD10, PDCD4, PSMF1, RANBP2, ILK, CSNK2A1, PSMD13, SERPINB6, PSMC5, PPME1, PSMD1, PSMD2…
establishment of vesicle localization	6.86687e-05	GO:0051650	34	16.8429	237	SEC31A, KIF5B, AP3M1, DPYSL2, DNM2, SCRIB, SEC13, SEC24A, AP3B1, SEC24C, RAB1B, ACTN4, TMED10, NSF, CUL3, YKT6, GOSR2, AP3D1, SEC24B, SEC23A, PPP6R3, CLASP1, NAPA, DCTN1, USO1, PPP6C, ATP2A2, SAR1B, DCTN2, RAB1A, SEC22B, RAB11B, LMAN1, PAFAH1B1
negative regulation of cellular metabolic process	7.04018e-05	GO:0031324	207	161.82	2277	RBMX, XPO1, DNAJA3, RPL13A, PSMD3, PPP2R1A, RPS14, SLIRP, EZR, YWHAB, HSP90AB1, TRIM28, PSMB2, PRMT5, SRSF2, USP9X, HNRNPD, SRSF7, PSMD14, RPS6KA3, GSTP1, MSH6, RBM4, PSMD11, CNOT9, CNOT1, DDX3X, HMGB2, PSMB5, PSPC1, SMARCA4, MTDH, HSPH1, ENO1, GFPT1, PHB2, PSMA4, BUB3, SUPT5H, PDS5A, NPM1, HIST1H4A, CTBP2, SMARCA5, RBBP7, SRSF6, SFPQ, HNRNPK, MRE11A, PAK2, RPS27A, PSMA7, SYNCRIP, RPS13, DDX5, HC…
microtubule-based movement	7.12506e-05	GO:0007018	32	15.4927	218	CFAP20, KIF5B, AP3M1, ACTR3, ARL3, AP3B1, KPNB1, ACTR2, UCHL1, AP2B1, MAP4, AP2M1, AP3D1, KIF11, KTN1, DYNC1I2, DYNC1H1, COPG1, DYNLL1, AP2A2, DCTN1, BICD2, AP2A1, RAB1A, LRPPRC, RHOT2, MAP1B, DYNC1LI1, RAB6A, DNAAF5, PAFAH1B1, KLC2
cytoskeleton-dependent intracellular transport	7.1437e-05	GO:0030705	18	6.53818	92	TUBA1C, KIF5B, AP3M1, AP3B1, ACTN4, UCHL1, AP3D1, COPG1, BICD2, TUBB, RAB1A, LRPPRC, RHOT2, MAP1B, TUBA1A, TUBA1B, RAB6A, PAFAH1B1
carbohydrate metabolic process	7.35666e-05	GO:0005975	81	52.874	744	LDHB, LDHA, PDHA1, IDH2, UGP2, ENO1, GFPT1, TPI1, SORD, PFKL, PFKP, CLTC, RPS27A, IDH3A, PYGB, MOGS, MDH1, PGD, AKR7A2, PKM, GNPDA1, IDH1, RPN2, PPP1CB, PPP1CA, GYS1, SLC25A1, SLC25A11, DAD1, DLAT, PGLS, DPM1, ALDH1B1, GPI, CHID1, PRKAG1, HMGB1, HK1, ADNP, NANS, SLC25A13, EIF6, G6PD, UGDH, GANAB, STT3B, GPD2, RANBP2, PGK1, WDR5, AKR1A1, GALNT2, GALK1, PMM2, TALDO1, TIGAR, AIMP1, AP2A1, PGM2, GOT2…
positive regulation of cellular component organization	7.41632e-05	GO:0051130	115	81.1588	1142	SPTBN1, EZR, YWHAB, TRIM28, KIF5B, CNOT1, HUWE1, PHB2, DNM2, CCT3, FAM134C, SFPQ, HNRNPK, MRE11A, SEPT9, WDR1, ACTR3, YWHAQ, HSP90AA1, ACSL3, U2AF1, PSMD8, CCT7, ACTN4, RAC1, ACTR2, GNL3, CAND1, PFN1, CUL3, RER1, PSMC3, ANXA2, MAPK1, U2AF2, ANXA1, CSNK2A2, BCLAF1, ARPC4, GMFB, CCT6A, YWHAE, ARPC1A, CORO1C, CORO1B, RUVBL1, DNM1L, EIF5A, WDR61, ADNP, STOML2, CDK9, FN1, MSN, NMT1, YWHAG, SF3A2, CCT5…
protein complex disassembly	7.58343e-05	GO:0043241	35	17.6247	248	SPTBN1, SPTBN2, CAPZB, GSPT1, SMARCA4, VTA1, SUPT16H, WDR1, MRPL47, PPP1CA, ASPH, TWF1, UPF1, MRPS34, ETF1, EIF5A, MRPS9, CAPZA2, CSNK1A1, CFL1, CLASP1, NAPA, MRPL4, ARHGEF2, DSTN, ADD1, MRPL45, VPS4A, MRPS23, SPTAN1, SMARCC1, MRPL44, MRPL37, SETX, MRPL13
alpha-amino acid biosynthetic process	8.0632e-05	GO:1901607	15	4.90364	69	GLUD1, DHFR, SHMT1, ASS1, GLS, OAT, ASNS, SHMT2, AHCY, CAD, AASDHPPT, PHGDH, MTHFD1, GOT2, ALDH18A1
spliceosomal tri-snRNP complex assembly	8.0926e-05	GO:0000244	6	0.852807	12	PRPF31, PRPF6, PRPF8, PRPF19, SRSF10, SART3
RNA polymerase II transcriptional preinitiation complex assembly	8.24516e-05	GO:0051123	8	1.56348	22	CAND1, PSMC3, HMGB1, PSMC5, PSMC2, PSMC1, PSMC4, PSMC6
regulation of nuclease activity	8.24516e-05	GO:0032069	8	1.56348	22	HMGB2, NPM1, PCNA, HMGB1, HSPA1A, BAX, PTPN1, RPS3
ribosomal protein import into nucleus	8.38856e-05	GO:0006610	5	0.568538	8	IPO5, KPNB1, IPO4, TNPO1, RPL23
cellular response to oxidative stress	8.5076e-05	GO:0034599	32	15.6348	220	TXNL1, HNRNPD, HSPH1, DNM2, DHFR, SFPQ, PNPT1, CDK2, ANXA1, STK24, AIFM1, DHRS2, G6PD, HSPA1A, ZNF622, PPP5C, LONP1, ATP2A2, RACK1, STAU1, CDK1, HDAC2, STK25, PARP1, SLC25A24, AKR1B1, RPS3, APEX1, TRAP1, NONO, PRDX3, SETX
NADP metabolic process	8.56916e-05	GO:0006739	10	2.41629	34	TPI1, PGD, IDH1, PGLS, G6PD, TALDO1, TIGAR, PGM2, NNT, ME2
regulation of alternative mRNA splicing, via spliceosome	8.56916e-05	GO:0000381	10	2.41629	34	RBMX, SRSF2, RBM4, SRSF6, RBM25, DDX5, PTBP1, THRAP3, HNRNPL, RNPS1
DNA replication initiation	8.56916e-05	GO:0006270	10	2.41629	34	CDK2, MCM6, MCM4, MCM5, POLA2, MCM7, MCM3, POLA1, MCM2, PRIM2
cell cycle checkpoint	9.02858e-05	GO:0000075	31	14.9952	211	RNASEH2B, PTPN11, CNOT9, CNOT1, BUB3, NPM1, MRE11A, RPS27A, FANCI, MAD2L1, CDK2, CDC5L, CSNK2A2, PCNA, SMC1A, MSH2, TIPRL, PRKDC, CSNK2A1, BAX, RPS27L, DDX39B, RPS6, CDK1, NSUN2, GIGYF2, DYNC1LI1, CCAR2, PRPF19, CARM1, PRMT1
positive regulation of transcription initiation from RNA polymerase II promoter	9.27406e-05	GO:0060261	7	1.20814	17	CAND1, PSMC3, PSMC5, PSMC2, PSMC1, PSMC4, PSMC6
glutamine family amino acid metabolic process	9.59662e-05	GO:0009064	15	4.9747	70	GLUD1, GFPT1, FAH, GMPS, ASS1, CTPS1, GLS, OAT, ASNS, CAD, PPAT, PHGDH, GOT2, GGH, ALDH18A1
aspartate family amino acid metabolic process	9.62826e-05	GO:0009066	13	3.9087	55	ASS1, ADSS, ASNS, DLD, AHCY, AASDHPPT, PHGDH, MTHFD1, GOT2, OGDH, GCDH, ALDH7A1, SMS
positive regulation of protein complex assembly	9.87149e-05	GO:0031334	31	15.0662	212	ACTR3, RAC1, ACTR2, CAND1, PFN1, PSMC3, BCLAF1, ARPC4, GMFB, ARPC1A, CORO1B, MSN, RPA1, CLASP1, BAX, PSMC5, RACK1, ARPC2, CUL4B, VCP, PSMC2, PSMC1, PSMC4, IDE, FSCN1, PARP1, RPS3, ARPC1B, PSMC6, SETX, ARPC3
response to oxidative stress	9.94128e-05	GO:0006979	48	27.3609	385	LDHA, TXNL1, HNRNPD, GSTP1, PSMB5, HSPH1, DNM2, GSS, DHFR, SFPQ, PNPT1, EEF2, CDK2, IDH1, GSR, PPP2CB, ALDH3A2, ANXA1, STK24, PSIP1, AIFM1, NDUFB4, DHRS2, FN1, G6PD, HSPA1A, PON2, NDUFS2, ZNF622, PPP5C, LONP1, ATP2A2, RACK1, STAU1, CYCS, CDK1, HDAC2, STK25, PARP1, SLC25A24, AKR1B1, RPS3, APEX1, TRAP1, KPNA4, NONO, PRDX3, SETX
fatty-acyl-CoA metabolic process	9.9442e-05	GO:0035337	12	3.41123	48	HSD17B12, AGK, ACOT7, ACSL3, ACACA, FASN, SLC25A1, ACOT9, ACSL4, HSD17B4, ACLY, GCDH
negative regulation of organelle organization	0.000102854	GO:0010639	39	20.7516	292	SPTBN1, SPTBN2, CAPZB, VAT1, BUB3, MAPRE1, NPM1, MAD2L1, OTUB1, PFN1, TWF1, HNRNPC, MAP4, CSNK2A2, GMFB, CORO1B, LMNA, CAPZA2, MSH2, HSPA1A, PSMD10, SLC25A5, CLASP1, CSNK2A1, NAT10, RBM14, RAD50, XRCC5, ARHGEF2, ADD1, TIGAR, DNMT1, TRIP12, PARP1, DYNC1LI1, SPTAN1, HNRNPA1, ACAA2, HNRNPU
purine nucleotide biosynthetic process	0.000104395	GO:0006164	34	17.1983	242	AK2, COASY, IMPDH2, ATP5A1, ATP5F1, PRPS1, ATIC, ACOT7, GMPS, GART, ATP5L, ADSS, PKM, ATP5O, GNAI3, CAP1, ADNP, STOML2, SLC25A13, ATP5H, PPAT, PAICS, MTHFD1, ATP5B, NME3, ATP5J2, AK1, VCP, APRT, HPRT1, ATP5C1, ADSL, ALDOA, GNAI2
apoptotic signaling pathway	0.000112107	GO:0097190	64	39.8687	561	TIMM50, PPP2R1A, YWHAB, GSTP1, MSH6, ANXA6, DDX3X, HMGB2, HSPH1, SFPQ, HNRNPK, PAK2, CUL2, HYOU1, DDX5, PDCD6, YWHAQ, SART1, PDIA3, PPP1CA, CUL3, USP47, BCLAF1, STK24, NDUFA13, YWHAE, AIFM1, DNM1L, LMNA, NMT1, YWHAG, MSH2, SGPL1, PRKDC, HSPA1A, PSMD10, SLC25A5, KRT18, DYNLL1, CLU, BAG6, ZNF622, BAX, ERP29, RPS27L, ARHGEF2, RACK1, PTPN1, KRT8, RHOT2, CYCS, CUL1, STK25, DNAJC10, MYBBP1A, CCAR2, RPS…
single-organism carbohydrate metabolic process	0.000113463	GO:0044723	72	46.2648	651	LDHA, PDHA1, IDH2, UGP2, ENO1, GFPT1, TPI1, SORD, PFKL, PFKP, CLTC, RPS27A, PYGB, MOGS, MDH1, PGD, PKM, GNPDA1, IDH1, RPN2, PPP1CB, PPP1CA, GYS1, SLC25A1, SLC25A11, DAD1, DLAT, DPM1, GPI, PRKAG1, HMGB1, HK1, ADNP, NANS, SLC25A13, EIF6, G6PD, STT3B, GPD2, RANBP2, PGK1, WDR5, AKR1A1, GALNT2, GALK1, PMM2, TALDO1, TIGAR, AIMP1, AP2A1, PGM2, GOT2, PYGL, SLC25A10, SLC2A1, ALDOC, VCP, RPN1, PGM1, PDK3, …
negative regulation of DNA endoreduplication	0.000117946	GO:0032876	4	0.355336	5	MRE11A, SMC1A, STAG2, SMC3
regulation of transcription initiation from RNA polymerase II promoter	0.000118682	GO:0060260	8	1.63455	23	CAND1, PSMC3, HMGB1, PSMC5, PSMC2, PSMC1, PSMC4, PSMC6
fatty-acyl-CoA biosynthetic process	0.000122678	GO:0046949	11	2.98482	42	HSD17B12, AGK, ACOT7, ACSL3, ACACA, FASN, SLC25A1, ACOT9, ACSL4, ACLY, GCDH
cellular amino acid biosynthetic process	0.000128784	GO:0008652	14	4.5483	64	GLUD1, DHFR, SHMT1, ASS1, GLS, OAT, ASNS, SHMT2, CAD, AASDHPPT, PHGDH, MTHFD1, GOT2, ALDH18A1
regulation of viral life cycle	0.000138291	GO:1903900	26	11.9393	168	TRIM28, TRIM25, DDX3X, SMARCA4, SUPT5H, ZC3HAV1, MRE11A, DDX5, PABPC1, SRPK1, PFN1, CDK9, HACD3, PPIB, VAPA, TARDBP, POLR2B, STAU1, PPIA, NELFB, VPS4A, POLR2H, EIF2AK2, ADAR, ILF3, LARP1
regulation of macromolecule metabolic process	0.000141486	GO:0060255	460	402.027	5657	RBMX, PARN, ANXA3, XPO1, EIF2A, RNASEH2B, DNAJA3, RPL13A, TYMS, PSMD3, DDX6, PPP2R1A, RPS14, SLIRP, GNAS, EZR, FUBP3, YWHAB, HSP90AB1, SEH1L, TRIM28, PSMB2, PRMT5, PTPN11, SRSF2, USP9X, HNRNPD, SRSF7, PSMD14, RPS6KA3, GSTP1, MSH6, HNRNPH1, RBM4, AARS, PSMD11, EIF4H, CNOT9, TRIM25, CNOT1, HNRNPDL, EIF3L, AAAS, DDX3X, HMGB2, PSMB5, PSPC1, SMARCA4, CAB39, MTDH, SAFB, HSPH1, ENO1, EEF1A1, GFPT1, PHB2…
organelle fission	0.000141788	GO:0048285	66	41.7875	588	PPP2R1A, SEH1L, PRMT5, USP9X, CKAP5, MSH6, NAA50, SMARCA4, PHB2, BUB3, MAPRE1, NUP153, PDS5A, EML4, MRE11A, CLTC, SEPT2, ACTR3, KPNB1, MAD2L1, CDK2, ACTR2, CUL3, UBE2I, NCAPD2, CSNK2A2, CLTCL1, TUBB3, KIF11, RUVBL1, DNM1L, SMC2, SMC1A, TRIP13, TUBGCP2, MSH2, CSNK1A1, STAG2, NCAPG, CLASP1, CSNK2A1, PSMD13, BAG6, DCTN1, MAPRE2, PPP5C, RAD50, RCC2, ARHGEF2, DCTN2, RPS6, RAN, FLNA, CDK1, NSUN2, PDCD6…
pentose-phosphate shunt	0.000142449	GO:0006098	7	1.27921	18	TPI1, PGD, PGLS, G6PD, TALDO1, TIGAR, PGM2
programmed cell death	0.000151845	GO:0012501	166	127.139	1789	LDHA, RSL1D1, TIMM50, DNAJA3, UBE2M, PPP2R1A, YWHAB, HSP90AB1, RPS6KA3, GSTP1, MSH6, AARS, ANXA6, DDX3X, HMGB2, MTDH, HSPH1, PHB2, DNM2, RPS3A, SCRIB, NPM1, EEF1A2, CIAPIN1, SFPQ, HNRNPK, MRE11A, PAK2, RPS27A, RBM25, CUL2, HYOU1, DDX5, PDCD6, YWHAQ, HSP90AA1, PGAM5, PKM, KPNB1, SART1, MAD2L1, ACTN4, RAC1, PDIA3, PPP1CA, PA2G4, CUL3, PTPA, PPP2CB, DAD1, ATAD3A, MAPK1, SLK, AIMP2, CTNNBL1, USP47, A…
response to inorganic substance	0.00015711	GO:0010035	58	35.6047	501	LDHA, SEC31A, HNRNPD, GSTP1, ATIC, HSPH1, DNM2, GSS, DHFR, EEF1A2, SORD, BSG, GART, ASS1, CPNE3, PDCD6, STIM1, EEF2, CPOX, CDK2, PPP2CB, EIF4A3, IQGAP1, ANXA1, STK24, PCNA, HMGCS1, AIFM1, ADNP, ANXA7, SLC25A13, FN1, CDK4, CLU, BAX, PPP5C, LONP1, RACK1, TIGAR, KRT8, CDK1, HDAC2, DNMT1, EIF2S1, LTA4H, CPNE1, STK25, SLC25A24, UROD, AKR1B1, RPS3, GGH, APEX1, ACO1, TRAP1, KPNA4, PRDX3, SETX
DNA damage checkpoint	0.000165279	GO:0000077	23	10.0915	142	RNASEH2B, PTPN11, CNOT9, CNOT1, NPM1, MRE11A, RPS27A, FANCI, CDK2, CDC5L, PCNA, MSH2, TIPRL, PRKDC, BAX, RPS27L, DDX39B, CDK1, GIGYF2, CCAR2, PRPF19, CARM1, PRMT1
regulation of protein phosphatase type 2A activity	0.000166986	GO:0034047	8	1.70561	24	PPP2R1A, PTPA, PPP2R5C, TIPRL, PPME1, PPP2R2A, PPP2R5D, EIF2AK2
DNA-templated transcriptional preinitiation complex assembly	0.000166986	GO:0070897	8	1.70561	24	CAND1, PSMC3, HMGB1, PSMC5, PSMC2, PSMC1, PSMC4, PSMC6
purine ribonucleotide biosynthetic process	0.000168791	GO:0009152	33	16.914	238	AK2, COASY, IMPDH2, ATP5A1, ATP5F1, PRPS1, ATIC, ACOT7, GMPS, GART, ATP5L, ADSS, PKM, ATP5O, GNAI3, CAP1, ADNP, STOML2, SLC25A13, ATP5H, PPAT, PAICS, ATP5B, NME3, ATP5J2, AK1, VCP, APRT, HPRT1, ATP5C1, ADSL, ALDOA, GNAI2
cell death	0.000177527	GO:0008219	174	134.672	1895	LDHA, RSL1D1, TIMM50, DNAJA3, UBE2M, PPP2R1A, YWHAB, HSP90AB1, RPS6KA3, GSTP1, MSH6, AARS, ANXA6, DDX3X, HMGB2, MTDH, HSPH1, PHB2, DNM2, RPS3A, SCRIB, NPM1, EEF1A2, SRSF6, CIAPIN1, SFPQ, HNRNPK, MRE11A, PAK2, RPS27A, RBM25, CUL2, HYOU1, DDX5, PDCD6, YWHAQ, HSP90AA1, PGAM5, PKM, KPNB1, SART1, MAD2L1, ACTN4, RAC1, PDIA3, PPP1CA, PA2G4, CUL3, PTPA, PPP2CB, DAD1, ATAD3A, MAPK1, SLK, AIMP2, CTNNBL1, U…
vesicle localization	0.000182515	GO:0051648	34	17.6957	249	SEC31A, KIF5B, AP3M1, DPYSL2, DNM2, SCRIB, SEC13, SEC24A, AP3B1, SEC24C, RAB1B, ACTN4, TMED10, NSF, CUL3, YKT6, GOSR2, AP3D1, SEC24B, SEC23A, PPP6R3, CLASP1, NAPA, DCTN1, USO1, PPP6C, ATP2A2, SAR1B, DCTN2, RAB1A, SEC22B, RAB11B, LMAN1, PAFAH1B1
protein oligomerization	0.000183412	GO:0051259	53	31.9092	449	RBMX, DECR1, NAXE, YWHAB, TRIM28, IMPDH2, ANXA6, CAB39, GFPT1, SPAG9, CPSF7, NPM1, HIST1H4A, FH, PFKL, SEPT9, PNPT1, AHNAK, SHMT1, ACACA, TMED10, ANXA2, GLS, OAT, RRM1, HSD17B10, DNM1L, STOML2, SHMT2, ATXN10, CLPP, PPAT, ILK, CLU, BAX, PPP5C, RPS19, SEPT11, LONP1, RACK1, EHD1, ACAT1, VCP, JUP, XRCC6, IDE, HPRT1, EHD4, CTNNA1, ST13, SEPT7, ADSL, ALDOA
retrograde transport, endosome to Golgi	0.000185683	GO:0042147	15	5.25897	74	SPAG9, CLTC, VPS26A, RAB7A, ARL1, YKT6, CLTCL1, GOSR2, DCTN1, SURF4, VPS35, VPS29, RAB9A, LMAN1, RAB6A
modulation by virus of host morphology or physiology	0.000187131	GO:0019048	10	2.62949	37	TYMS, ZC3HAV1, KPNB1, SLC25A6, KPNA3, VAPA, KPNA2, KPNA1, EIF2AK2, KPNA4
regulation of metabolic process	0.000192619	GO:0019222	484	426.616	6003	RBMX, PARN, ANXA3, PDHA1, XPO1, EIF2A, RNASEH2B, DNAJA3, RPL13A, TYMS, PSMD3, DDX6, PPP2R1A, RPS14, SLIRP, GNAS, EZR, FUBP3, YWHAB, HSP90AB1, SEH1L, TRIM28, PSMB2, PRMT5, PTPN11, SRSF2, USP9X, HNRNPD, SRSF7, PSMD14, RPS6KA3, GSTP1, MSH6, HNRNPH1, RBM4, AARS, PSMD11, EIF4H, CNOT9, TRIM25, CNOT1, HNRNPDL, EIF3L, AAAS, DDX3X, HMGB2, PSMB5, PSPC1, SMARCA4, CAB39, MTDH, SAFB, HSPH1, ENO1, EEF1A1, GFPT…
mitotic cell cycle checkpoint	0.00020452	GO:0007093	23	10.2337	144	CNOT9, CNOT1, BUB3, NPM1, MRE11A, RPS27A, FANCI, MAD2L1, CDK2, CSNK2A2, PCNA, SMC1A, MSH2, PRKDC, CSNK2A1, BAX, RPS27L, RPS6, CDK1, GIGYF2, DYNC1LI1, CARM1, PRMT1
error-free translesion synthesis	0.000211718	GO:0070987	7	1.35028	19	RPS27A, PCNA, RFC5, RFC2, RFC3, RPA1, VCP
DNA strand elongation involved in DNA replication	0.000230356	GO:0006271	8	1.77668	25	FEN1, PCNA, POLA2, RFC3, POLD1, POLA1, PARP1, PRIM2
positive regulation of RNA splicing	0.000230356	GO:0033120	8	1.77668	25	RBMX, HNRNPK, U2AF2, HSPA1A, SNRNP70, THRAP3, PRPF19, SETX
negative regulation of molecular function	0.000230867	GO:0044092	106	75.7576	1066	ANXA3, IPO5, PSMD3, PPP2R1A, PSMB2, CNN3, PSMD14, RPS6KA3, GSTP1, PSMD11, DDX3X, PSMB5, CAB39, PHB2, PSMA4, SPAG9, BUB3, MAPRE1, NPM1, ZC3HAV1, HNRNPK, PAK2, RPS27A, RNH1, PSMA7, PSMD8, MAD2L1, CDK2, UCHL1, CAND1, PPP1CA, CUL3, PTPA, EIF4A3, PSMC3, ANXA2, IQGAP1, PRPSAP2, USP47, ANXA1, GNAI3, GPI, GMFB, YWHAE, PSMB4, CORO1C, ADNP, RRP1B, USP7, PICALM, YWHAG, CHORDC1, TIPRL, PSMD7, PSMD10, PDCD4, …
proteasome assembly	0.000232305	GO:0043248	6	0.994941	14	PSMD11, PSMD8, PSMG1, PSMD10, PSMD13, KIAA0368
AMP metabolic process	0.000232305	GO:0046033	6	0.994941	14	AK2, PRPS1, ADSS, AK1, APRT, ADSL
spindle localization	0.000237926	GO:0051653	10	2.70055	38	ACTR3, KPNB1, ACTR2, MAP4, MYH9, DYNC1H1, CLASP1, ARHGEF2, NUMA1, PAFAH1B1
regulation of protein complex disassembly	0.00024509	GO:0043244	16	5.96965	84	SPTBN1, SPTBN2, CAPZB, WDR1, ASPH, TWF1, UPF1, ETF1, EIF5A, CAPZA2, CLASP1, ARHGEF2, DSTN, ADD1, SPTAN1, SETX
organic acid catabolic process	0.000248691	GO:0016054	30	15.1373	213	DECR1, HADHA, GLUD1, FAH, SORD, SHMT1, ETFB, ALDH3A2, GLS, OAT, HSD17B10, DLD, AHCY, HSD17B4, ETFA, PPAT, AKR1A1, ABCD3, HADHB, DTD1, GOT2, ACAT1, ACAD9, MCCC2, PCCB, ECHS1, ACOX1, OGDH, GCDH, ALDH7A1
cell surface receptor signaling pathway involved in cell-cell signaling	0.000267295	GO:1905114	62	39.5134	556	PSMD3, PPP2R1A, PSMB2, G3BP1, PSMD14, PSMD11, DDX3X, PSMB5, SMARCA4, PSMA4, CTNND1, CLTC, VPS26A, RPS27A, PSMA7, SKP1, PSMD8, RAC1, PPP1CA, PFN1, CUL3, EIF4A3, PSMC3, AP2B1, CSNK2A2, PSMB4, AP2M1, WDR61, CSNK1A1, PSMD7, PSMD10, PSMF1, ILK, CSNK2A1, AP2A2, PSMD13, PSMC5, PSMD1, PSMD2, CDC73, EMD, RACK1, VPS35, AP2A1, PSMB7, PSMC2, JUP, PSMA1, PSMC1, CUL1, PSMC4, PSMA2, VPS29, CCAR2, PSMD12, PSMB3,…
positive regulation of immune response	0.00027503	GO:0050778	69	45.1987	636	PSMD3, EZR, HSP90AB1, PSMB2, PSMD14, RPS6KA3, MSH6, PSMD11, HMGB2, PSMB5, PHB2, PSMA4, PAK2, RPS27A, PSMA7, SKP1, ACTR3, HSP90AA1, PSMD8, RAC1, ACTR2, PSMC3, MAPK1, ANXA1, CYFIP2, ARPC4, UBE2V1, PSMB4, PHB, ARPC1A, AP1G1, HMGB1, STOML2, PSMD7, HSPA1A, PSMD10, PSMF1, CLU, PSMD13, BAX, ACTG1, PSMC5, PSMD1, RPS19, MAPK3, PSMD2, C1QBP, ARPC2, HSPD1, PSMB7, PSMC2, PLCG1, PSMA1, PSMC1, CUL1, PHPT1, PSM…
nuclear-transcribed mRNA poly(A) tail shortening	0.000281918	GO:0000289	9	2.27415	32	PARN, CNOT9, CNOT1, PABPC1, EIF4A3, EIF4G1, EIF4A1, EIF4A2, PAIP1
response to nitrogen compound	0.00028504	GO:1901698	91	63.463	893	LDHA, IPO5, HADHA, TYMS, ATP6V1B2, EZR, PSMB2, PTPN11, HNRNPD, SRSF5, GSTP1, AARS, DPYSL2, RAB10, GFPT1, DNM2, GSS, NPM1, DHFR, ATP6V1A, ZC3HAV1, HNRNPK, CYC1, BSG, ASS1, ADSS, PKM, EEF2, CDK2, TMED10, ATP6V1H, EFTUD2, MAPK1, CAPN2, CDC5L, ANXA1, HMGCS1, AIFM1, ASNS, EIF6, DDX21, YWHAG, CAD, DIAPH1, SRRT, RAP1B, PRKDC, PPAT, NCOA5, BAX, DHX15, NAMPT, ATP6V1C1, PPP5C, MAPK3, ATP2A2, STAT1, ARHGEF2…
regulation of nitrogen compound metabolic process	0.000310593	GO:0051171	355	304.239	4281	RBMX, ANXA3, XPO1, EIF2A, DNAJA3, RPL13A, TYMS, PSMD3, DDX6, PPP2R1A, RPS14, SLIRP, EZR, FUBP3, YWHAB, HSP90AB1, TRIM28, PSMB2, PRMT5, SRSF2, USP9X, HNRNPD, SRSF7, PSMD14, RPS6KA3, MSH6, HNRNPH1, RBM4, AARS, PSMD11, EIF4H, CNOT9, TRIM25, CNOT1, HNRNPDL, EIF3L, DDX3X, HMGB2, PSMB5, PSPC1, SMARCA4, MTDH, SAFB, HSPH1, ENO1, EEF1A1, PHB2, PSMA4, DNM2, CCT3, SUPT5H, PDS5A, SUPT16H, EIF3G, NPM1, HIST1H…
cellular protein complex disassembly	0.000311331	GO:0043624	28	13.9292	196	SPTBN1, SPTBN2, CAPZB, GSPT1, WDR1, MRPL47, ASPH, TWF1, UPF1, MRPS34, ETF1, EIF5A, MRPS9, CAPZA2, CFL1, CLASP1, NAPA, MRPL4, ARHGEF2, DSTN, ADD1, MRPL45, VPS4A, MRPS23, SPTAN1, MRPL44, MRPL37, MRPL13
regulation of mitochondrion organization	0.000317691	GO:0010821	30	15.3505	216	YWHAB, HUWE1, VAT1, YWHAQ, U2AF1, PSMD8, U2AF2, CSNK2A2, YWHAE, RUVBL1, DNM1L, STOML2, LMNA, NMT1, YWHAG, HSPA1A, PSMD10, SLC25A5, DYNLL1, BAX, NPEPPS, ACTL6A, LONP1, C1QBP, TIGAR, LRPPRC, PSMB7, SAE1, FAM162A, ACAA2
positive regulation of cellular process	0.000319371	GO:0048522	375	323.427	4551	SPTBN1, LDHA, RBMX, ANXA3, EIF2A, RNASEH2B, DNAJA3, UBE2M, PSMD3, PPP2R1A, CAPN1, GNAS, EZR, FUBP3, YWHAB, HSP90AB1, SEH1L, GLUD1, TRIM28, PSMB2, ARHGAP1, PRMT5, PTPN11, CFAP20, KIF5B, HNRNPD, CAPNS1, PSMD14, RPS6KA3, GSTP1, MSH6, RBM4, PSMD11, CNOT9, TRIM25, CNOT1, HUWE1, DDX3X, HMGB2, PSMB5, DPYSL2, SMARCA4, CAB39, MTDH, SAFB, HSPH1, PHB2, PSMA4, DNM2, CCT3, SPAG9, BUB3, SUPT5H, MAPRE1, SUPT16H…
postreplication repair	0.0003294	GO:0006301	12	3.83763	54	TRIM25, RPS27A, USP10, PCNA, UBE2V1, RFC5, MSH2, RFC2, RFC3, RPA1, POLD1, VCP
carboxylic acid catabolic process	0.000332576	GO:0046395	27	13.2896	187	DECR1, HADHA, GLUD1, FAH, SORD, SHMT1, ETFB, ALDH3A2, GLS, OAT, DLD, HSD17B4, ETFA, PPAT, AKR1A1, ABCD3, HADHB, DTD1, GOT2, ACAD9, MCCC2, PCCB, ECHS1, ACOX1, OGDH, GCDH, ALDH7A1
negative regulation of cell cycle	0.000334369	GO:0045786	52	31.9092	449	CNOT9, CNOT1, SMARCA4, CAB39, BUB3, SCRIB, NPM1, MRE11A, RPS27A, CUL2, PNPT1, FANCI, SART1, MAD2L1, CDK2, SLFN11, PA2G4, CUL3, USP47, CDC5L, CSNK2A2, PCNA, PRKAG1, SMC1A, CDK9, MSH2, PRKDC, STAG2, CDK4, PDCD4, ILK, CSNK2A1, KHDRBS1, BAX, RPS27L, RBM14, DDX39B, CDC73, RPS6, CDK1, AK1, CUL1, GIGYF2, VPS4A, MYBBP1A, DYNC1LI1, PRPF19, SMC3, CARM1, EIF4G2, PRMT1, PPM1G
cytoskeletal anchoring at plasma membrane	0.000334767	GO:0007016	5	0.710672	10	EZR, FLNB, EPB41L3, JUP, TLN1
chaperone-mediated autophagy	0.000334767	GO:0061684	5	0.710672	10	EEF1A1, EEF1A2, HSP90AA1, SNRNP70, LAMP2
viral latency	0.000334767	GO:0019042	5	0.710672	10	HCFC1, PSIP1, XRCC5, PPIA, XRCC6
AMP biosynthetic process	0.000338796	GO:0006167	4	0.426403	6	PRPS1, ADSS, APRT, ADSL
fructose 1,6-bisphosphate metabolic process	0.000338796	GO:0030388	4	0.426403	6	PFKL, TIGAR, ALDOC, ALDOA
response to chemical	0.000351387	GO:0042221	337	287.609	4047	SPTBN1, LDHA, RBMX, SRP54, ANXA3, AK2, SPTBN2, IPO5, XPO1, HADHA, UBE2M, RPL13A, TYMS, PSMD3, PPP2R1A, ATP6V1B2, GNAS, EZR, TXNL1, HSP90AB1, PSMB2, IMPDH2, SEC31A, PTPN11, KIF5B, USP9X, HNRNPD, SRSF5, PSMD14, RPS6KA3, GSTP1, HNRNPH1, RBM4, AARS, PSMD11, CNOT9, TRIM25, CNOT1, DDX3X, HMGB2, PSMB5, SRP68, DPYSL2, SMARCA4, RAB10, ATIC, MTDH, SAFB, HSPH1, EEF1A1, GFPT1, PHB2, PSMA4, SULT1A1, DNM2, SUP…
hexitol metabolic process	0.000358081	GO:0006059	3	0.213202	3	SORD, GALK1, AKR1B1
pentose-phosphate shunt, oxidative branch	0.000358081	GO:0009051	3	0.213202	3	PGD, PGLS, G6PD
NADPH regeneration	0.000358081	GO:0006740	3	0.213202	3	IDH1, G6PD, NNT
establishment or maintenance of cell polarity	0.000359836	GO:0007163	24	11.2997	159	EZR, CKAP5, RAB10, SCRIB, ACTR3, ACTR2, DOCK7, MAP4, CAP1, MYH9, LMNA, MSN, RAP1B, CLASP1, ILK, ARHGEF2, RACK1, MAP1B, STK25, FSCN1, NUMA1, ARF4, CTNNA1, PAFAH1B1
regulation of G1/S transition of mitotic cell cycle	0.000360814	GO:2000045	21	9.3098	131	CNOT9, CNOT1, DDX3X, SMARCA4, NPM1, RPS27A, CDK2, SLFN11, ANXA1, PCNA, PRKDC, BAX, RPS27L, CDC73, CUL4B, CDK1, GIGYF2, APEX1, CARM1, PSME3, PRMT1
Arp2/3 complex-mediated actin nucleation	0.000363396	GO:0034314	9	2.34522	33	ACTR3, ACTR2, ARPC4, GMFB, ARPC1A, CORO1B, ARPC2, ARPC1B, ARPC3
positive regulation of nuclease activity	0.000363904	GO:0032075	6	1.06601	15	HMGB2, PCNA, HSPA1A, BAX, PTPN1, RPS3
proton transport	0.000376015	GO:0015992	23	10.6601	150	ATP6V1B2, ATP5A1, ATP5F1, ATP6V1A, ATP5L, ATP5O, ACTN4, ATP6V1H, COX4I1, STOML2, COX6C, ATP5H, NDUFA4, ATP5B, ATP6V1C1, ATP5J2, UQCR10, UQCRC1, ATP6AP1, UQCRFS1, NNT, ATP1A1, ATP5C1
regulation of cell cycle G1/S phase transition	0.000390029	GO:1902806	22	10.0205	141	CNOT9, CNOT1, DDX3X, SMARCA4, PHB2, NPM1, RPS27A, CDK2, SLFN11, ANXA1, PCNA, PRKDC, BAX, RPS27L, CDC73, CUL4B, CDK1, GIGYF2, APEX1, CARM1, PSME3, PRMT1
regulation of mitochondrial membrane permeability involved in apoptotic process	0.000394442	GO:1902108	12	3.9087	55	YWHAB, YWHAQ, YWHAE, NMT1, YWHAG, HSPA1A, SLC25A5, DYNLL1, BAX, MTCH2, RHOT2, ACAA2
regulation of mitochondrial membrane permeability	0.0004084	GO:0046902	13	4.47723	63	YWHAB, CNP, YWHAQ, YWHAE, NMT1, YWHAG, HSPA1A, SLC25A5, DYNLL1, BAX, MTCH2, RHOT2, ACAA2
organelle transport along microtubule	0.0004084	GO:0072384	13	4.47723	63	KIF5B, AP3M1, AP3B1, UCHL1, AP3D1, COPG1, BICD2, RAB1A, LRPPRC, RHOT2, MAP1B, RAB6A, PAFAH1B1
endosomal transport	0.000421208	GO:0016197	33	17.7668	250	EZR, RAB10, VTA1, SPAG9, CLTC, VPS26A, RPS27A, RAB7A, ARL1, YKT6, MAPK1, AP1M1, CLTCL1, GOSR2, AP3D1, AP1G1, MSN, RAB5B, PICALM, DCTN1, SURF4, MAPK3, EHD1, VPS35, AP2A1, RAB5C, VPS4A, VPS29, RAB11B, RAB9A, LMAN1, EHD4, RAB6A
cell division	0.000423089	GO:0051301	60	38.5895	543	SPTBN1, SEH1L, TUBA1C, USP9X, CKAP5, RAB10, BUB3, MAPRE1, PDS5A, SEPT9, SEPT2, ACTR3, ARL3, YBX1, MAD2L1, CDK2, ACTR2, PPP1CB, PPP1CA, CUL3, UBE2I, DOCK7, MAP4, NCAPD2, GNAI3, KIF11, RUVBL1, SMC2, MYH9, SMC1A, MYH10, CSNK1A1, STAG2, CDK4, NCAPG, CLASP1, MAPRE2, SEPT11, RCC2, ARHGEF2, RACK1, TUBB, RAN, CDK1, NSUN2, PDCD6IP, TOP1, VPS4A, PRPF40A, DYNC1LI1, NUMA1, RPS3, TUBA1A, SMC3, SMC4, MCMBP, TU…
tetrahydrofolate metabolic process	0.000431064	GO:0046653	7	1.49241	21	TYMS, ATIC, DHFR, GART, SHMT1, SHMT2, MTHFD1
maturation of LSU-rRNA	0.000431064	GO:0000470	7	1.49241	21	RSL1D1, RPL7, RPL35, EIF6, PES1, RPL7A, RPL10A
cellular response to cytokine stimulus	0.000434302	GO:0071345	72	48.3968	681	RBMX, RPL13A, PSMD3, HSP90AB1, PSMB2, IMPDH2, PTPN11, PSMD14, GSTP1, PSMD11, CNOT9, TRIM25, PSMB5, PSMA4, BYSL, RPS27A, PSMA7, SYNCRIP, PNPT1, ASS1, PSMD8, OTUB1, FASN, PSMC3, MAPK1, UPF1, CDC5L, EPRS, NDUFA13, CDC37, PSMB4, PHB, CDK9, FN1, PSMD7, HSPA1A, PSMD10, PSMF1, KRT18, HLA-C, PSMD13, RPL3, PSMC5, ZC3H15, HLA-B, PSMD1, MAPK3, PSMD2, STAT1, ARHGEF2, RACK1, PTPN1, KRT8, PSMB7, PSMC2, PSMA1, …
negative regulation of mitotic cell cycle	0.0004349	GO:0045930	28	14.2134	200	CNOT9, CNOT1, SMARCA4, BUB3, SCRIB, NPM1, MRE11A, RPS27A, FANCI, MAD2L1, CDK2, SLFN11, USP47, CSNK2A2, PCNA, SMC1A, MSH2, PRKDC, CSNK2A1, BAX, RPS27L, CDC73, RPS6, CDK1, GIGYF2, DYNC1LI1, CARM1, PRMT1
regulation of cellular protein localization	0.000450099	GO:1903827	59	37.8788	533	SPTBN1, IPO5, XPO1, EZR, YWHAB, HSP90AB1, TRIM28, PTPN11, KIF5B, HUWE1, HSPH1, CCT3, HNRNPK, CLTC, YWHAQ, HSP90AA1, ACSL3, U2AF1, PSMD8, CCT7, GNL3, RER1, HNRNPM, U2AF2, CSNK2A2, CCT6A, YWHAE, AP2M1, RUVBL1, G3BP2, LMNA, MSN, NMT1, YWHAG, CCT5, TCP1, PSMD10, ANP32B, TMEM30A, DYNLL1, NPEPPS, ACTL6A, EMD, RACK1, CCT4, PTPN1, FLNA, PSMB7, DKC1, CDK1, JUP, VPS4A, RAB11B, PARP1, SAE1, CCT8, RANGAP1, C…
DNA integrity checkpoint	0.000456168	GO:0031570	23	10.8022	152	RNASEH2B, PTPN11, CNOT9, CNOT1, NPM1, MRE11A, RPS27A, FANCI, CDK2, CDC5L, PCNA, MSH2, TIPRL, PRKDC, BAX, RPS27L, DDX39B, CDK1, GIGYF2, CCAR2, PRPF19, CARM1, PRMT1
hydrogen transport	0.000456168	GO:0006818	23	10.8022	152	ATP6V1B2, ATP5A1, ATP5F1, ATP6V1A, ATP5L, ATP5O, ACTN4, ATP6V1H, COX4I1, STOML2, COX6C, ATP5H, NDUFA4, ATP5B, ATP6V1C1, ATP5J2, UQCR10, UQCRC1, ATP6AP1, UQCRFS1, NNT, ATP1A1, ATP5C1
long-chain fatty-acyl-CoA biosynthetic process	0.000464445	GO:0035338	10	2.91376	41	HSD17B12, AGK, ACOT7, ACSL3, ACACA, FASN, SLC25A1, ACOT9, ACSL4, ACLY
regulation of DNA-dependent DNA replication	0.000464445	GO:0090329	10	2.91376	41	MRE11A, CDK2, RFC5, SMC1A, STOML2, RFC2, STAG2, RFC3, LONP1, SMC3
translesion synthesis	0.000464445	GO:0019985	10	2.91376	41	TRIM25, RPS27A, USP10, PCNA, RFC5, RFC2, RFC3, RPA1, POLD1, VCP
regulation of mitochondrial outer membrane permeabilization involved in apoptotic signaling pathway	0.000464445	GO:1901028	10	2.91376	41	YWHAB, YWHAQ, YWHAE, NMT1, YWHAG, HSPA1A, SLC25A5, DYNLL1, BAX, ACAA2
apoptotic process	0.000468705	GO:0006915	161	125.647	1768	LDHA, RSL1D1, TIMM50, DNAJA3, UBE2M, PPP2R1A, YWHAB, HSP90AB1, RPS6KA3, GSTP1, MSH6, AARS, ANXA6, DDX3X, HMGB2, MTDH, HSPH1, PHB2, DNM2, RPS3A, SCRIB, NPM1, EEF1A2, CIAPIN1, SFPQ, HNRNPK, MRE11A, PAK2, RPS27A, RBM25, CUL2, HYOU1, DDX5, PDCD6, YWHAQ, HSP90AA1, KPNB1, SART1, MAD2L1, ACTN4, RAC1, PDIA3, PPP1CA, PA2G4, CUL3, PTPA, PPP2CB, DAD1, ATAD3A, MAPK1, SLK, AIMP2, CTNNBL1, USP47, ANXA1, CSNK2A…
regulation of response to DNA damage stimulus	0.000476165	GO:2001020	22	10.1626	143	RNASEH2B, TRIM28, HNRNPK, DDX5, OTUB1, USP47, BCLAF1, PCNA, DEK, UBE2V1, HMGB1, CDK9, PSMD10, CLU, DDX39B, TIGAR, TRIP12, CCAR2, RPS3, APEX1, TPT1, RIF1
signal transduction involved in DNA damage checkpoint	0.000479891	GO:0072422	13	4.5483	64	CNOT9, CNOT1, NPM1, RPS27A, CDK2, CDC5L, PCNA, PRKDC, BAX, CDK1, PRPF19, CARM1, PRMT1
signal transduction involved in DNA integrity checkpoint	0.000479891	GO:0072401	13	4.5483	64	CNOT9, CNOT1, NPM1, RPS27A, CDK2, CDC5L, PCNA, PRKDC, BAX, CDK1, PRPF19, CARM1, PRMT1
mitochondrial outer membrane permeabilization	0.000527604	GO:0097345	11	3.48229	49	YWHAB, YWHAQ, YWHAE, NMT1, YWHAG, HSPA1A, SLC25A5, DYNLL1, BAX, RHOT2, ACAA2
vacuolar transport	0.000531405	GO:0007034	35	19.4724	274	EZR, AP3M1, RAB10, VTA1, SPAG9, CLTC, VPS26A, RPS27A, AP3B1, RAB7A, ARL1, YKT6, MAPK1, AP1M1, CLTCL1, GOSR2, AP3D1, AP1G1, MSN, RAB5B, PICALM, DCTN1, SURF4, MAPK3, EHD1, VPS35, AP2A1, RAB5C, VPS4A, VPS29, RAB11B, RAB9A, LMAN1, EHD4, RAB6A
histone mRNA metabolic process	0.000546597	GO:0008334	8	1.98988	28	SSB, CPSF2, UPF1, SNRPB, SNRPD3, SNRPE, NCBP1, SNRPF
peptidyl-proline modification	0.000557387	GO:0018208	12	4.05083	57	PTPA, NTMT1, PPIB, FKBP10, RANBP2, FKBP8, PPIA, FKBP3, P4HA1, PIN4, FKBP5, PPIL1
signal transduction involved in cell cycle checkpoint	0.000561458	GO:0072395	13	4.61937	65	CNOT9, CNOT1, NPM1, RPS27A, CDK2, CDC5L, PCNA, PRKDC, BAX, CDK1, PRPF19, CARM1, PRMT1
rRNA-containing ribonucleoprotein complex export from nucleus	0.000577816	GO:0071428	5	0.781739	11	XPO1, RPS15, EIF6, RPSA, RAN
protein folding in endoplasmic reticulum	0.000577816	GO:0034975	5	0.781739	11	PDIA3, EMC1, VAPA, DNAJC10, HSP90B1
maturation of SSU-rRNA from tricistronic rRNA transcript (SSU-rRNA, 5.8S rRNA, LSU-rRNA)	0.000584768	GO:0000462	9	2.48735	35	RPS14, RPS24, BYSL, MRPS9, RPSA, RPS19, RPS16, EMG1, RPS8
toxin transport	0.000584768	GO:1901998	9	2.48735	35	COPB2, CCT3, CCT7, CCT5, TCP1, CCT4, DNAJA1, CCT8, CCT2
positive regulation of mRNA processing	0.000593697	GO:0050685	7	1.56348	22	RBMX, HSPA1A, SNRNP70, THRAP3, CDC73, NCBP1, PRPF19
positive regulation of metabolic process	0.000622059	GO:0009893	250	207.943	2926	RBMX, ANXA3, EIF2A, PSMD3, EZR, FUBP3, HSP90AB1, TRIM28, PSMB2, PTPN11, HNRNPD, PSMD14, RPS6KA3, GSTP1, MSH6, PSMD11, CNOT1, DDX3X, HMGB2, PSMB5, SMARCA4, CAB39, SAFB, HSPH1, PHB2, PSMA4, DNM2, CCT3, SPAG9, BUB3, SUPT5H, SUPT16H, SCRIB, NPM1, HIST1H4A, CTBP2, DHFR, SMARCA5, EEF1A2, POLDIP3, ZC3HAV1, HNRNPK, MRE11A, PAK2, KRT17, RPS27A, HNRNPAB, PSMA7, SYNCRIP, SKP1, PNPT1, DDX5, ASS1, HCFC1, PDCD…
negative regulation of G1/S transition of mitotic cell cycle	0.000625237	GO:2000134	16	6.46712	91	CNOT9, CNOT1, SMARCA4, NPM1, RPS27A, CDK2, SLFN11, PCNA, PRKDC, BAX, RPS27L, CDC73, CDK1, GIGYF2, CARM1, PRMT1
response to organonitrogen compound	0.000631939	GO:0010243	80	55.7167	784	LDHA, IPO5, HADHA, TYMS, ATP6V1B2, EZR, PSMB2, PTPN11, HNRNPD, SRSF5, GSTP1, AARS, DPYSL2, RAB10, GFPT1, DNM2, GSS, DHFR, ATP6V1A, HNRNPK, CYC1, BSG, ASS1, ADSS, PKM, EEF2, CDK2, TMED10, ATP6V1H, EFTUD2, MAPK1, CAPN2, CDC5L, ANXA1, HMGCS1, AIFM1, ASNS, EIF6, YWHAG, CAD, DIAPH1, RAP1B, PRKDC, PPAT, NCOA5, BAX, DHX15, NAMPT, ATP6V1C1, PPP5C, MAPK3, ATP2A2, STAT1, ARHGEF2, PTPN1, POR, CDK1, JUP, HDA…
positive regulation of mitochondrial membrane permeability involved in apoptotic process	0.000633575	GO:1902110	11	3.55336	50	YWHAB, YWHAQ, YWHAE, NMT1, YWHAG, HSPA1A, SLC25A5, DYNLL1, BAX, RHOT2, ACAA2
mitochondrial outer membrane permeabilization involved in programmed cell death	0.000633575	GO:1902686	11	3.55336	50	YWHAB, YWHAQ, YWHAE, NMT1, YWHAG, HSPA1A, SLC25A5, DYNLL1, BAX, RHOT2, ACAA2
iron ion transport	0.000658018	GO:0006826	12	4.1219	58	ATP6V1B2, DNM2, ATP6V1A, CLTC, ATP6V1H, PICALM, FTH1, ATP6V1C1, RAB11B, SLC39A14, ATP6AP1, SFXN1
protein-DNA complex subunit organization	0.000659883	GO:0071824	32	17.4825	246	HMGB2, SMARCA4, SUPT16H, NPM1, HIST1H4A, NAP1L4, SMARCA5, RBBP7, RPS27A, CAND1, PSMC3, IPO4, HAT1, HMGB1, RUVBL1, NAP1L1, HIST1H2BK, RPA1, ANP32B, PSMC5, CUL4B, HIST1H1C, PSMC2, HIST1H2BJ, PSMC1, PSMC4, PARP1, SMARCC1, MCM2, RBBP4, PSMC6, SART3
organ regeneration	0.000678913	GO:0031100	15	5.89858	83	ANXA3, TYMS, PRMT5, SRSF5, GSTP1, PRPS1, ATIC, PKM, CDK2, EIF4A1, CAD, CDK4, PPAT, CDK1, NCL
positive regulation of macromolecule metabolic process	0.000689201	GO:0010604	235	194.369	2735	RBMX, ANXA3, EIF2A, PSMD3, EZR, FUBP3, HSP90AB1, TRIM28, PSMB2, PTPN11, HNRNPD, PSMD14, RPS6KA3, MSH6, PSMD11, CNOT1, DDX3X, HMGB2, PSMB5, SMARCA4, CAB39, SAFB, HSPH1, PHB2, PSMA4, DNM2, CCT3, SPAG9, BUB3, SUPT5H, SUPT16H, SCRIB, NPM1, HIST1H4A, CTBP2, SMARCA5, POLDIP3, ZC3HAV1, HNRNPK, MRE11A, PAK2, KRT17, RPS27A, HNRNPAB, PSMA7, SYNCRIP, SKP1, PNPT1, DDX5, HCFC1, PDCD6, FANCI, PSMD8, YBX1, EEF2…
serine family amino acid metabolic process	0.000697542	GO:0009069	10	3.05589	43	DHFR, MPST, GART, SHMT1, EIF4A3, SHMT2, AHCY, PHGDH, MTHFD1, SARS
protein peptidyl-prolyl isomerization	0.000697542	GO:0000413	10	3.05589	43	PTPA, PPIB, FKBP10, RANBP2, FKBP8, PPIA, FKBP3, PIN4, FKBP5, PPIL1
response to cytokine	0.000707656	GO:0034097	80	55.9299	787	RBMX, RPL13A, TYMS, PSMD3, HSP90AB1, PSMB2, IMPDH2, PTPN11, PSMD14, GSTP1, PSMD11, CNOT9, TRIM25, PSMB5, PSMA4, GSS, BYSL, RPS27A, PSMA7, SYNCRIP, PNPT1, ASS1, PSMD8, OTUB1, FASN, PSMC3, MAPK1, UPF1, CDC5L, ANXA1, EPRS, NDUFA13, CDC37, PSMB4, PHB, ACSL4, SHMT2, CDK9, FN1, PSMD7, HSPA1A, PSMD10, PSMF1, KRT18, HLA-C, PSMD13, RPL3, PSMC5, ZC3H15, HLA-B, PSMD1, MAPK3, PSMD2, STAT1, ARHGEF2, RACK1, PT…
mitotic DNA damage checkpoint	0.000707877	GO:0044773	16	6.53818	92	CNOT9, CNOT1, NPM1, MRE11A, RPS27A, FANCI, CDK2, PCNA, MSH2, PRKDC, BAX, RPS27L, CDK1, GIGYF2, CARM1, PRMT1
folic acid-containing compound metabolic process	0.000708223	GO:0006760	8	2.06095	29	TYMS, ATIC, DHFR, GART, SHMT1, SHMT2, MTHFD1, GGH
morphogenesis of an epithelium	0.000720576	GO:0002009	56	36.1732	509	PSMD3, EZR, TRIM28, PSMB2, PSMD14, PSMD11, PSMB5, RAB10, PHB2, PSMA4, SCRIB, CLTC, KRT17, RPS27A, PSMA7, PSMD8, RAC1, PPP1CA, PFN1, PSMC3, AP2B1, PSMB4, AP2M1, SEC24B, MSN, RBM15, PSMD7, PSMD10, CLASP1, PSMF1, ILK, AP2A2, MTHFD1, PSMD13, BAX, PSMC5, PSMD1, RPS7, PSMD2, STAT1, AP2A1, FLNA, PSMB7, PSMC2, PSMA1, PSMC1, PSMC4, PSMA2, PSMD12, PSMB3, PSMD6, PSMA3, PSMB1, PSMC6, PSME3, PAFAH1B1
positive regulation of multi-organism process	0.000724956	GO:0043902	23	11.1576	157	DDX3X, SMARCA4, SUPT5H, RAB7A, PABPC1, SRPK1, PFN1, CDK9, CFL1, HACD3, PPIB, VAPA, MAPK3, C1QBP, POLR2B, STAU1, PPIA, NELFB, VPS4A, POLR2H, OSBP, ADAR, LARP1
tetrahydrofolate biosynthetic process	0.000745386	GO:0046654	4	0.49747	7	ATIC, DHFR, GART, MTHFD1
purine nucleobase transport	0.000745386	GO:0006863	4	0.49747	7	SLC25A6, SLC25A5, VDAC3, SLC25A4
nuclear-transcribed mRNA catabolic process, deadenylation-dependent decay	0.000760044	GO:0000288	13	4.7615	67	PARN, DDX6, CNOT9, CNOT1, EXOSC2, PABPC1, EIF4A3, EIF4G1, EIF4A1, EDC4, DIS3, EIF4A2, PAIP1
protein localization to chromosome	0.000773423	GO:0034502	12	4.19297	59	CCT7, GNL3, CCT6A, CCT5, TCP1, RUVBL2, RCC2, CCT4, DKC1, CDK1, CCT8, CCT2
positive regulation of defense response	0.000792048	GO:0031349	46	28.3558	399	PSMD3, PSMB2, PSMD14, RPS6KA3, PSMD11, HMGB2, PSMB5, PSMA4, PAK2, RPS27A, PSMA7, SKP1, PSMD8, PSMC3, UBE2V1, PSMB4, AP1G1, HMGB1, SLC25A6, PSMD7, HSPA1A, PSMD10, PSMF1, PSMD13, PSMC5, PSMD1, RPS19, MAPK3, PSMD2, C1QBP, HSPD1, PSMB7, PSMC2, PSMA1, PSMC1, CUL1, PSMC4, PSMA2, PSMD12, PSMB3, PSMD6, PSMA3, PSMB1, PSMC6, HSP90B1, PSME3
positive regulation of cellular metabolic process	0.000796731	GO:0031325	234	193.942	2729	RBMX, ANXA3, EIF2A, PSMD3, EZR, FUBP3, HSP90AB1, TRIM28, PSMB2, PTPN11, HNRNPD, PSMD14, RPS6KA3, GSTP1, MSH6, PSMD11, CNOT1, DDX3X, HMGB2, PSMB5, SMARCA4, CAB39, SAFB, HSPH1, PHB2, PSMA4, DNM2, CCT3, SPAG9, BUB3, SUPT5H, SUPT16H, SCRIB, NPM1, CTBP2, SMARCA5, EEF1A2, POLDIP3, ZC3HAV1, HNRNPK, MRE11A, PAK2, KRT17, RPS27A, HNRNPAB, PSMA7, SYNCRIP, SKP1, PNPT1, DDX5, ASS1, HCFC1, PDCD6, HSP90AA1, FAN…
glyceraldehyde-3-phosphate metabolic process	0.000801485	GO:0019682	7	1.63455	23	TPI1, PGD, PGLS, G6PD, TALDO1, TIGAR, PGM2
protein refolding	0.000801485	GO:0042026	7	1.63455	23	HSP90AA1, DNAJC7, HSPA1A, PTGES3, SNRNP70, HSPD1, ST13
positive regulation of DNA-templated transcription, elongation	0.000801485	GO:0032786	7	1.63455	23	SUPT5H, SUPT16H, TCEB1, WDR61, DDX39B, CDC73, ALYREF
proteolysis	0.000806328	GO:0006508	146	113.708	1600	RBMX, YME1L1, PSMD3, CAPN1, HSP90AB1, PSMB2, USP9X, CAPNS1, PSMD14, RPS6KA3, PSMD11, TRIM25, HUWE1, DDX3X, PSMB5, PHB2, PSMA4, BUB3, CCDC47, CTSD, PAK2, RPS27A, PSMA7, SKP1, CUL2, PRCP, PDCD6, HECTD1, PSMD8, USP10, MAD2L1, OTUB1, UBR4, PDIA3, UCHL1, ASPH, CUL3, PMPCA, PPP2CB, PREP, UBE2I, PSMC3, CAPN2, UQCRC2, PEPD, USP47, CYFIP2, NDUFA13, GPI, TCEB1, YWHAE, PSMB4, PHB, AIFM1, HMGB1, MYH9, LAP3, …
regulation of viral genome replication	0.000832543	GO:0045069	14	5.40111	76	DDX3X, ZC3HAV1, DDX5, PABPC1, SRPK1, HACD3, PPIB, VAPA, STAU1, PPIA, EIF2AK2, ADAR, ILF3, LARP1
regulation of DNA-templated transcription, elongation	0.000845991	GO:0032784	10	3.12696	44	SUPT5H, SUPT16H, TCEB1, WDR61, DDX39B, CDC73, NELFB, CCAR2, ALYREF, TSFM
regulation of membrane permeability	0.000879617	GO:0090559	13	4.83257	68	YWHAB, CNP, YWHAQ, YWHAE, NMT1, YWHAG, HSPA1A, SLC25A5, DYNLL1, BAX, MTCH2, RHOT2, ACAA2
regulation of multi-organism process	0.000879714	GO:0043900	52	33.2595	468	PPP2R1A, TRIM28, TRIM25, DDX3X, SMARCA4, SUPT5H, ZC3HAV1, MRE11A, PAK2, DDX5, MDH1, RAB7A, RAC1, PABPC1, ATP6V1H, SRPK1, PFN1, NUP93, AP2B1, EXOC2, AP1M1, SNRPB, AP2M1, SNRPD1, AP1G1, AP1B1, CDK9, CFL1, HACD3, PPIB, VAPA, AP2A2, PCBP2, FXR2, MRPS2, TARDBP, MAPK3, STAT1, C1QBP, POLR2B, AP2A1, STAU1, PPIA, EIF2S1, NELFB, VPS4A, POLR2H, EIF2AK2, OSBP, ADAR, ILF3, LARP1
negative regulation of DNA metabolic process	0.000895668	GO:0051053	18	7.95953	112	TRIM28, MSH6, PDS5A, MRE11A, OTUB1, HNRNPC, SMC1A, MSH2, STAG2, NAT10, RAD50, XRCC5, TRIP12, PARP1, RPS3, SMC3, HNRNPA1, HNRNPU
organophosphate biosynthetic process	0.000897933	GO:0090407	59	38.9448	548	AK2, TYMS, COASY, IMPDH2, PTPN11, ATP5A1, ARF3, ATP5F1, PRPS1, ATIC, TPI1, ACOT7, DHFR, GMPS, SORD, GART, ATP5L, SHMT1, ADSS, CPNE3, PKM, ATP5O, CTPS1, IDH1, CMPK1, DPM1, PRPSAP2, GNAI3, CAP1, RRM1, ADNP, STOML2, SLC25A13, G6PD, CAD, ATP5H, PPAT, PAICS, MTHFD1, ATP5B, PNP, AKR1A1, NAMPT, NME3, ATP5J2, PYGL, AK1, VCP, FDPS, UMPS, APRT, CPNE1, HPRT1, KARS, SPTLC1, ATP5C1, ADSL, ALDOA, GNAI2
pigment biosynthetic process	0.000898976	GO:0046148	11	3.6955	52	PRPS1, GMPS, GART, SHMT1, CPOX, AP3D1, PPAT, PAICS, APRT, HPRT1, UROD
positive regulation of mitochondrial membrane permeability	0.000898976	GO:0035794	11	3.6955	52	YWHAB, YWHAQ, YWHAE, NMT1, YWHAG, HSPA1A, SLC25A5, DYNLL1, BAX, RHOT2, ACAA2
negative regulation of cell cycle G1/S phase transition	0.000901736	GO:1902807	16	6.68032	94	CNOT9, CNOT1, SMARCA4, NPM1, RPS27A, CDK2, SLFN11, PCNA, PRKDC, BAX, RPS27L, CDC73, CDK1, GIGYF2, CARM1, PRMT1
response to epidermal growth factor	0.000906183	GO:0070849	8	2.13202	30	GSTP1, EEF1A1, IQGAP1, MAPK1, CAD, MCM7, MAPK3, PLCG1
nucleotide-excision repair, DNA incision, 5'-to lesion	0.000906445	GO:0006296	9	2.62949	37	RPS27A, PCNA, RFC5, RFC2, RFC3, RPA1, POLD1, CUL4B, PARP1
positive regulation of protein metabolic process	0.000919472	GO:0051247	135	104.256	1467	PSMD3, EZR, HSP90AB1, PSMB2, PTPN11, HNRNPD, PSMD14, PSMD11, DDX3X, PSMB5, CAB39, HSPH1, PHB2, PSMA4, SPAG9, BUB3, NPM1, POLDIP3, HNRNPK, MRE11A, PAK2, KRT17, RPS27A, PSMA7, SYNCRIP, SKP1, PDCD6, FANCI, PSMD8, EEF2, MAD2L1, RAB7A, RAC1, PABPC1, GNL3, NSF, ASPH, PTPA, EIF4A3, UBE2I, PSMC3, ANXA2, IQGAP1, MAPK1, DOCK7, AIMP2, ELAVL1, DCUN1D5, CYFIP2, NDUFA13, PSMB4, PHB, AIFM1, PRKAG1, RPS4X, HMGB1…
regulation of acetyl-CoA biosynthetic process from pyruvate	0.000932636	GO:0010510	5	0.852807	12	PDHA1, DLAT, DLD, PDK3, PDHB
protein-DNA complex assembly	0.000934382	GO:0065004	29	15.6348	220	HMGB2, NPM1, HIST1H4A, NAP1L4, SMARCA5, RBBP7, RPS27A, CAND1, PSMC3, IPO4, HAT1, HMGB1, RUVBL1, NAP1L1, HIST1H2BK, RPA1, ANP32B, PSMC5, CUL4B, HIST1H1C, PSMC2, HIST1H2BJ, PSMC1, PSMC4, PARP1, MCM2, RBBP4, PSMC6, SART3
mitotic G1/S transition checkpoint	0.00101456	GO:0044819	13	4.90364	69	CNOT9, CNOT1, NPM1, RPS27A, CDK2, PCNA, PRKDC, BAX, RPS27L, CDK1, GIGYF2, CARM1, PRMT1
mitotic G1 DNA damage checkpoint	0.00101456	GO:0031571	13	4.90364	69	CNOT9, CNOT1, NPM1, RPS27A, CDK2, PCNA, PRKDC, BAX, RPS27L, CDK1, GIGYF2, CARM1, PRMT1
long-chain fatty-acyl-CoA metabolic process	0.00101942	GO:0035336	10	3.19802	45	HSD17B12, AGK, ACOT7, ACSL3, ACACA, FASN, SLC25A1, ACOT9, ACSL4, ACLY
modification by symbiont of host morphology or physiology	0.00101942	GO:0044003	10	3.19802	45	TYMS, ZC3HAV1, KPNB1, SLC25A6, KPNA3, VAPA, KPNA2, KPNA1, EIF2AK2, KPNA4
peptidyl-lysine modification	0.00103417	GO:0018205	45	27.9294	393	SEH1L, TRIM28, AAAS, NAA50, NUP153, UBA2, NUP133, HNRNPK, HCFC1, GNL3, UBE2I, HNRNPC, NUP93, NUP98, PCNA, NUP210, HAT1, RUVBL1, EIF5A, WDR61, SMC1A, STAG2, RAE1, RPA1, RANBP2, WDR5, BAG6, NUP155, NUP205, NUP107, ACTL6A, MAPK3, RUVBL2, HIST1H1C, POR, NOP58, HDAC2, DNMT1, TOP1, PARP1, NUP160, SAE1, NUP85, SMC3, RANGAP1
organelle assembly	0.00103484	GO:0070925	64	43.2799	609	EIF2A, DDX6, RPS14, EZR, CNOT1, DDX3X, RPL10, VTA1, RPL23A, NPM1, SEPT9, TBC1D15, WDR1, RPL24, SEPT2, ATXN2L, RPL5, KPNB1, RPS27, RAB1B, RAB7A, CDK2, ACTR2, MRTO4, RPL12, RPL6, RPL38, BRIX1, RPS15, MAP4, CHD4, KIF11, DHX30, TUBGCP2, RPL11, MSN, EIF6, MYH10, RPSA, ATXN10, RPS10, DYNC1H1, CLASP1, RPL3, ACTG1, RPS27L, RPS19, RBM14, VDAC3, C1QBP, EHD1, TUBB, RAB1A, KRT8, FLNA, RPS5, RPS17, PDCD6IP, V…
positive regulation of lamellipodium organization	0.0010627	GO:1902745	7	1.70561	24	DNM2, HSP90AA1, RAC1, CORO1C, CORO1B, ARPC2, FSCN1
negative regulation of telomere maintenance	0.0010627	GO:0032205	7	1.70561	24	HNRNPC, NAT10, RAD50, XRCC5, PARP1, HNRNPA1, HNRNPU
nucleotide-excision repair, DNA gap filling	0.0010627	GO:0006297	7	1.70561	24	RPS27A, PCNA, RFC5, RFC2, RFC3, RPA1, POLD1
modulation by virus of host process	0.0010627	GO:0019054	7	1.70561	24	KPNB1, SLC25A6, KPNA3, VAPA, KPNA2, KPNA1, KPNA4
positive regulation of cellular protein metabolic process	0.00106551	GO:0032270	128	98.4281	1385	PSMD3, EZR, HSP90AB1, PSMB2, PTPN11, HNRNPD, PSMD14, PSMD11, DDX3X, PSMB5, CAB39, HSPH1, PHB2, PSMA4, SPAG9, BUB3, NPM1, POLDIP3, MRE11A, PAK2, KRT17, RPS27A, PSMA7, SYNCRIP, SKP1, PDCD6, FANCI, PSMD8, EEF2, MAD2L1, RAC1, PABPC1, GNL3, ASPH, PTPA, EIF4A3, UBE2I, PSMC3, ANXA2, IQGAP1, MAPK1, DOCK7, AIMP2, ELAVL1, DCUN1D5, CYFIP2, NDUFA13, PSMB4, PHB, AIFM1, PRKAG1, RPS4X, HMGB1, EIF5A, MYH9, WDR61…
response to hydrogen peroxide	0.00106981	GO:0042542	19	8.74127	123	LDHA, HSPH1, EEF2, PPP2CB, ANXA1, STK24, AIFM1, PPP5C, RACK1, CDK1, HDAC2, STK25, AKR1B1, RPS3, APEX1, TRAP1, KPNA4, PRDX3, SETX
response to abiotic stimulus	0.00108059	GO:0009628	105	78.245	1101	LDHA, DNAJA3, HSP90AB1, SEH1L, SLC38A2, HNRNPD, MSH6, RBM4, AAAS, DDX3X, CAB39, HSPH1, DNM2, NUP153, NUP133, EEF1A2, RBBP7, SORD, RPS27A, CUL2, HYOU1, MYOF, ADSS, PDCD6, HSP90AA1, PKM, CDK2, ACTN4, RAC1, PPP1CB, PPP1CA, MAPK1, CAPN2, NUP93, CLPB, FEN1, USP47, ANXA1, NUP98, PCNA, NUP210, TCEB1, HMGCS1, PSIP1, YWHAE, AIFM1, RRM1, SMC1A, ASNS, LMNA, ANXA7, AHCY, NMT1, CHORDC1, MSH2, DNAJC7, PRKDC, H…
protein N-linked glycosylation via asparagine	0.00111385	GO:0018279	9	2.70055	38	RPN2, DAD1, DPM1, STT3B, VCP, RPN1, STT3A, LMAN1, DDOST
mRNA polyadenylation	0.00111385	GO:0006378	9	2.70055	38	CSTF1, SUPT5H, PNPT1, CPSF2, PABPC1, CDK9, CSTF3, CDC73, NCBP1
mRNA cis splicing, via spliceosome	0.00112106	GO:0045292	6	1.27921	18	SNRNP200, SART1, SRSF1, PSIP1, DDX23, NCBP1
modification of morphology or physiology of other organism involved in symbiotic interaction	0.00112528	GO:0051817	15	6.18285	87	TYMS, SMARCA4, ZC3HAV1, KPNB1, SLC25A6, KPNA3, CFL1, PPIB, VAPA, KPNA2, TARDBP, KPNA1, RAB9A, EIF2AK2, KPNA4
mitochondrial RNA metabolic process	0.0011461	GO:0000959	8	2.20308	31	DARS2, SLIRP, YARS2, PNPT1, HSD17B10, LRPPRC, SUPV3L1, ELAC2
pyrimidine nucleotide biosynthetic process	0.0011461	GO:0006221	8	2.20308	31	TYMS, PRPS1, SHMT1, CTPS1, CMPK1, CAD, NME3, UMPS
G1 DNA damage checkpoint	0.00116638	GO:0044783	13	4.9747	70	CNOT9, CNOT1, NPM1, RPS27A, CDK2, PCNA, PRKDC, BAX, RPS27L, CDK1, GIGYF2, CARM1, PRMT1
mitochondrial electron transport, NADH to ubiquinone	0.00122087	GO:0006120	10	3.26909	46	NDUFC2, NDUFA9, NDUFA13, NDUFB4, DLD, NDUFA4, NDUFS2, NDUFA10, NDUFV1, NDUFS1
Fc receptor mediated stimulatory signaling pathway	0.00127536	GO:0002431	16	6.89352	97	HSP90AB1, ACTR3, HSP90AA1, RAC1, ACTR2, MAPK1, CYFIP2, ARPC4, ARPC1A, ACTG1, MAPK3, ARPC2, PLCG1, ARPC1B, ARPC3, CSK
regulation of intrinsic apoptotic signaling pathway	0.00128207	GO:2001242	21	10.2337	144	DDX3X, HSPH1, SFPQ, HNRNPK, HYOU1, USP47, BCLAF1, NDUFA13, DNM1L, HSPA1A, CLU, BAX, ERP29, ARHGEF2, RACK1, PTPN1, CCAR2, RPS3, TPT1, TRAP1, NONO
regulation of anatomical structure morphogenesis	0.0012849	GO:0022603	98	72.5596	1021	ANXA3, PDLIM5, PSMD3, EZR, PSMB2, CAPZB, PSMD14, PSMD11, PSMB5, DPYSL2, VAT1, MTDH, PHB2, PSMA4, DNM2, SRSF6, HNRNPK, CLTC, RPS27A, SEPT9, RNH1, PSMA7, TBC1D15, PDCD6, PSMD8, ACTN4, GTF2I, RAC1, PFN1, PSMC3, AP2B1, ANXA1, MAP4, MYL12B, LARP4, PSMB4, AP2M1, CORO1C, HMGB1, CORO1B, DNM1L, MYH9, ADNP, SEC24B, ANXA7, FN1, MSN, MYH10, CSNK1A1, DIAPH1, WARS, PSMD7, CFL1, PSMD10, CLASP1, PSMF1, EPB41L3, …
negative regulation of biological process	0.00130236	GO:0048519	362	316.818	4458	SPTBN1, RBMX, SPTBN2, IPO5, XPO1, RNASEH2B, NDRG3, DNAJA3, RPL13A, PSMD3, DDX6, PPP2R1A, RPS14, SLIRP, EZR, YWHAB, HSP90AB1, SEH1L, TRIM28, PSMB2, PRMT5, CAPZB, PTPN11, G3BP1, SRSF2, USP9X, HNRNPD, ATP5A1, SRSF7, PSMD14, RPS6KA3, GSTP1, MSH6, RBM4, AARS, PSMD11, CNOT9, TRIM25, CNOT1, AAAS, DDX3X, HMGB2, PSMB5, VAT1, PSPC1, SMARCA4, CAB39, MTDH, HSPH1, ENO1, GFPT1, PHB2, PSMA4, DNM2, BUB3, SUPT5H,…
negative regulation of gene expression	0.0013027	GO:0010629	131	101.626	1430	RBMX, XPO1, RNASEH2B, DNAJA3, RPL13A, RPS14, EZR, YWHAB, SEH1L, TRIM28, USP9X, HNRNPD, SRSF7, RBM4, CNOT9, CNOT1, AAAS, DDX3X, HMGB2, PSPC1, SMARCA4, MTDH, ENO1, PHB2, SUPT5H, NUP153, HIST1H4A, NUP133, CTBP2, SMARCA5, RBBP7, SRSF6, TSN, SFPQ, HNRNPK, RPS27A, SYNCRIP, RPS13, DDX5, HCFC1, YWHAQ, HIST1H2AG, CDK2, PABPC1, PA2G4, CUL3, EIF4A3, UBE2I, NUP93, EIF3E, U2AF2, UPF1, USP47, EPRS, BCLAF1, NDU…
regulation of RNA binding	0.00133077	GO:1905214	3	0.284269	4	EIF4A3, CDK9, CARM1
pentose biosynthetic process	0.00133077	GO:0019322	3	0.284269	4	PGD, G6PD, TALDO1
adenine biosynthetic process	0.00133077	GO:0046084	3	0.284269	4	PAICS, APRT, HPRT1
scaRNA localization to Cajal body	0.00133077	GO:0090666	3	0.284269	4	TCP1, CCT4, CCT2
mitochondrial RNA 3'-end processing	0.00133077	GO:0000965	3	0.284269	4	PNPT1, SUPV3L1, ELAC2
formaldehyde metabolic process	0.00133077	GO:0046292	3	0.284269	4	ESD, ALDH3A2, ADH5
ribosomal small subunit export from nucleus	0.00133077	GO:0000056	3	0.284269	4	XPO1, RPS15, RAN
regulation of mRNA binding	0.00133077	GO:1902415	3	0.284269	4	EIF4A3, CDK9, CARM1
adenine metabolic process	0.00133077	GO:0046083	3	0.284269	4	PAICS, APRT, HPRT1
peptidyl-asparagine modification	0.00135799	GO:0018196	9	2.77162	39	RPN2, DAD1, DPM1, STT3B, VCP, RPN1, STT3A, LMAN1, DDOST
nucleotide-excision repair, DNA incision	0.00135799	GO:0033683	9	2.77162	39	RPS27A, PCNA, RFC5, RFC2, RFC3, RPA1, POLD1, CUL4B, PARP1
RNA polyadenylation	0.00135799	GO:0043631	9	2.77162	39	CSTF1, SUPT5H, PNPT1, CPSF2, PABPC1, CDK9, CSTF3, CDC73, NCBP1
ribosome localization	0.00140535	GO:0033750	4	0.568538	8	XPO1, RPS15, EIF6, RAN
establishment of integrated proviral latency	0.00140535	GO:0075713	4	0.568538	8	PSIP1, XRCC5, PPIA, XRCC6
cargo loading into vesicle	0.00140535	GO:0035459	4	0.568538	8	TMED10, SEC24B, PICALM, RAB1A
positive regulation of IRE1-mediated unfolded protein response	0.00140535	GO:1903896	4	0.568538	8	HSPA1A, TMEM33, BAX, PTPN1
fructose 6-phosphate metabolic process	0.00140535	GO:0006002	4	0.568538	8	GFPT1, PFKL, PFKP, TALDO1
establishment of ribosome localization	0.00140535	GO:0033753	4	0.568538	8	XPO1, RPS15, EIF6, RAN
ribosomal subunit export from nucleus	0.00140535	GO:0000054	4	0.568538	8	XPO1, RPS15, EIF6, RAN
regulation of DNA endoreduplication	0.00140535	GO:0032875	4	0.568538	8	MRE11A, SMC1A, STAG2, SMC3
regulation of deoxyribonuclease activity	0.00140535	GO:0032070	4	0.568538	8	NPM1, PCNA, HMGB1, RPS3
mitotic DNA integrity checkpoint	0.00142583	GO:0044774	16	6.96459	98	CNOT9, CNOT1, NPM1, MRE11A, RPS27A, FANCI, CDK2, PCNA, MSH2, PRKDC, BAX, RPS27L, CDK1, GIGYF2, CARM1, PRMT1
lysine metabolic process	0.00142705	GO:0006553	5	0.923874	13	DLD, AASDHPPT, OGDH, GCDH, ALDH7A1
regulation of acyl-CoA biosynthetic process	0.00142705	GO:0050812	5	0.923874	13	PDHA1, DLAT, DLD, PDK3, PDHB
pyrimidine nucleoside monophosphate biosynthetic process	0.00142705	GO:0009130	5	0.923874	13	TYMS, SHMT1, CMPK1, CAD, UMPS
ATP hydrolysis coupled proton transport	0.00143402	GO:0015991	8	2.27415	32	ATP6V1B2, ATP5A1, ATP6V1A, ATP6V1H, ATP5B, ATP6V1C1, ATP6AP1, ATP1A1
energy coupled proton transmembrane transport, against electrochemical gradient	0.00143402	GO:0015988	8	2.27415	32	ATP6V1B2, ATP5A1, ATP6V1A, ATP6V1H, ATP5B, ATP6V1C1, ATP6AP1, ATP1A1
2-oxoglutarate metabolic process	0.0015423	GO:0006103	6	1.35028	19	IDH2, IDH3B, IDH1, DLD, GOT2, OGDH
pyrimidine nucleobase metabolic process	0.0015423	GO:0006206	6	1.35028	19	TYMS, CMPK1, MAPK1, RRM1, CAD, UMPS
error-prone translesion synthesis	0.0015423	GO:0042276	6	1.35028	19	RPS27A, PCNA, RFC5, RFC2, RFC3, RPA1
acetyl-CoA biosynthetic process	0.0015423	GO:0006085	6	1.35028	19	PDHA1, DLAT, DLD, ACLY, PDK3, PDHB
mitochondrion morphogenesis	0.0015423	GO:0070584	6	1.35028	19	SLIRP, PNPT1, DNM1L, BAX, POLDIP2, SUPV3L1
apoptotic DNA fragmentation	0.0015423	GO:0006309	6	1.35028	19	HMGB2, KPNB1, AIFM1, HMGB1, BAX, KPNA1
response to reactive oxygen species	0.00157116	GO:0000302	28	15.4216	217	LDHA, HNRNPD, GSTP1, HSPH1, DNM2, DHFR, EEF2, CDK2, GSR, PPP2CB, ALDH3A2, ANXA1, STK24, AIFM1, FN1, PPP5C, RACK1, CYCS, CDK1, HDAC2, STK25, AKR1B1, RPS3, APEX1, TRAP1, KPNA4, PRDX3, SETX
mitotic sister chromatid segregation	0.00157663	GO:0000070	19	9.02554	127	PPP2R1A, SEH1L, NAA50, BUB3, PDS5A, KPNB1, MAD2L1, CUL3, NCAPD2, CSNK2A2, SMC2, SMC1A, NCAPG, CSNK2A1, PDCD6IP, VPS4A, DYNC1LI1, SMC3, SMC4
DNA packaging	0.0016428	GO:0006323	26	14.0002	197	HMGB2, NPM1, HIST1H4A, NAP1L4, SMARCA5, RBBP7, SRPK1, IPO4, NCAPD2, HAT1, AIFM1, HMGB1, RUVBL1, SMC2, NAP1L1, HIST1H2BK, NCAPG, ANP32B, NAA10, HIST1H1C, CDK1, HIST1H2BJ, MCM2, SMC4, RBBP4, SART3
mitochondrial translation	0.00165478	GO:0032543	18	8.38593	118	HARS, DARS2, YARS2, GFM1, MRPL47, TUFM, MRPS34, MRPS9, MRPS2, MRPL4, C1QBP, LRPPRC, MRPL45, MRPS23, MRPL44, MRPL37, TSFM, MRPL13
positive regulation of nitrogen compound metabolic process	0.00168062	GO:0051173	150	119.393	1680	RBMX, ANXA3, EIF2A, FUBP3, HSP90AB1, TRIM28, HNRNPD, RPS6KA3, MSH6, CNOT1, DDX3X, HMGB2, SMARCA4, SAFB, HSPH1, DNM2, CCT3, SUPT5H, SUPT16H, NPM1, CTBP2, SMARCA5, POLDIP3, ZC3HAV1, HNRNPK, MRE11A, KRT17, RPS27A, HNRNPAB, SYNCRIP, PNPT1, DDX5, ASS1, HCFC1, HSP90AA1, ACSL3, YBX1, EEF2, C14orf166, CCT7, DDX17, CDK2, KPNA6, RAC1, PABPC1, GNL3, CAND1, PFN1, EIF4A3, PSMC3, MAPK1, U2AF2, UPF1, ELAVL1, BC…
regulation of defense response	0.00172586	GO:0031347	75	53.4425	752	PSMD3, HSP90AB1, PSMB2, PTPN11, PSMD14, RPS6KA3, GSTP1, PSMD11, HMGB2, PSMB5, PHB2, PSMA4, ZC3HAV1, PAK2, RPS27A, PSMA7, SKP1, MDH1, PSMD8, RAC1, ATP6V1H, PSMC3, NUP93, AP2B1, ANXA1, AP1M1, SNRPB, CDC37, UBE2V1, CHID1, PSMB4, AP2M1, PHB, SNRPD1, AP1G1, HMGB1, SLC25A6, AP1B1, PSMD7, HSPA1A, PSMD10, PSMF1, AP2A2, PCBP2, PSMD13, FXR2, MRPS2, PSMC5, PSMD1, RPS19, MAPK3, PSMD2, STAT1, C1QBP, PTPN1, HS…
establishment of localization by movement along microtubule	0.00177182	GO:0010970	16	7.10672	100	KIF5B, AP3M1, ARL3, AP3B1, UCHL1, AP3D1, COPG1, DYNLL1, DCTN1, BICD2, RAB1A, LRPPRC, RHOT2, MAP1B, RAB6A, PAFAH1B1
regulation of glucose transport	0.00177182	GO:0010827	16	7.10672	100	SEH1L, PTPN11, AAAS, NUP153, NUP133, NUP93, NUP98, CLTCL1, NUP210, RAE1, RANBP2, NUP155, NUP205, NUP107, NUP160, NUP85
acetyl-CoA metabolic process	0.00177643	GO:0006084	8	2.34522	33	PDHA1, ACACA, FASN, DLAT, DLD, ACLY, PDK3, PDHB
response to organic cyclic compound	0.00179716	GO:0014070	89	65.524	922	LDHA, ANXA3, TYMS, EZR, HSP90AB1, PSMB2, HNRNPD, GSTP1, CNOT9, CNOT1, HMGB2, DPYSL2, SMARCA4, SAFB, PHB2, DNM2, NPM1, DHFR, RBBP7, BYSL, ZC3HAV1, HNRNPK, PAK2, BSG, DDX5, ASS1, SLC16A1, ADSS, HCFC1, ACSL3, EEF2, DDX17, CDK2, IDH1, EFTUD2, EIF4A3, MAPK1, CDC5L, ANXA1, HMGCS1, PHB, AIFM1, HMGB1, ASNS, ANXA7, FN1, MSN, G6PD, DDX21, CBX3, CAD, DIAPH1, SRRT, RAP1B, CDK4, RAE1, NEDD8, BAX, NAMPT, PPP5C…
immune response-regulating cell surface receptor signaling pathway involved in phagocytosis	0.00179748	GO:0002433	15	6.46712	91	HSP90AB1, ACTR3, HSP90AA1, RAC1, ACTR2, MAPK1, CYFIP2, ARPC4, ARPC1A, ACTG1, MAPK3, ARPC2, PLCG1, ARPC1B, ARPC3
Fc-gamma receptor signaling pathway involved in phagocytosis	0.00179748	GO:0038096	15	6.46712	91	HSP90AB1, ACTR3, HSP90AA1, RAC1, ACTR2, MAPK1, CYFIP2, ARPC4, ARPC1A, ACTG1, MAPK3, ARPC2, PLCG1, ARPC1B, ARPC3
protein targeting to mitochondrion	0.00181697	GO:0006626	21	10.5179	148	TIMM44, TIMM50, HUWE1, HSP90AA1, U2AF1, PSMD8, PMPCA, U2AF2, CSNK2A2, NDUFA13, SLC25A6, RUVBL1, TOMM40, AFG3L2, NPEPPS, TOMM22, ACTL6A, TOMM70, PSMB7, SAE1, TOMM34
signal transduction in response to DNA damage	0.0018232	GO:0042770	18	8.457	119	CNOT9, CNOT1, NPM1, RPS27A, DDX5, USP10, CDK2, CDC5L, PCNA, SMC1A, PRKDC, PSMD10, BAX, MYO6, CDK1, PRPF19, CARM1, PRMT1
regulation of programmed cell death	0.00194127	GO:0043067	125	97.3621	1370	LDHA, RSL1D1, DNAJA3, UBE2M, PPP2R1A, YWHAB, HSP90AB1, RPS6KA3, GSTP1, AARS, DDX3X, HMGB2, MTDH, HSPH1, PHB2, DNM2, RPS3A, SCRIB, NPM1, EEF1A2, CIAPIN1, SFPQ, HNRNPK, MRE11A, PAK2, RPS27A, RBM25, HYOU1, PDCD6, YWHAQ, MAD2L1, ACTN4, RAC1, PDIA3, PPP1CA, PA2G4, PTPA, DAD1, ATAD3A, SLK, CTNNBL1, USP47, ANXA1, BCLAF1, NDUFA13, GPI, YWHAE, PHB, AIFM1, HMGB1, DNM1L, SERBP1, ADNP, ASNS, DHRS2, LMNA, ACT…
ATP-dependent chromatin remodeling	0.00197574	GO:0043044	13	5.25897	74	SMARCA4, NPM1, HIST1H4A, SMARCA5, RBBP7, HNRNPC, CHD4, RUVBL1, ACTL6A, MTA2, HDAC2, SMARCC1, RBBP4
DNA synthesis involved in DNA repair	0.00197574	GO:0000731	13	5.25897	74	TRIM25, MRE11A, RPS27A, USP10, PCNA, RFC5, RFC2, RFC3, RPA1, POLD1, RAD50, POLA1, VCP
ERAD pathway	0.0020149	GO:0036503	14	5.89858	83	TRIM25, CCDC47, PSMC3, STT3B, BAG6, PSMC5, VCP, PSMC2, PSMC1, KIAA0368, PSMC4, DNAJC10, PSMC6, HSP90B1
response to hormone	0.00203783	GO:0009725	82	59.7675	841	ANXA3, AK2, HADHA, TYMS, ATP6V1B2, PTPN11, SRSF5, GSTP1, CNOT9, CNOT1, HMGB2, SMARCA4, RAB10, SAFB, GFPT1, PHB2, RBBP7, ATP6V1A, SORD, HNRNPK, CYC1, BSG, DDX5, ASS1, PRCP, PKM, DDX17, CDK2, ACACA, IDH1, ATP6V1H, ANXA2, MAPK1, CDC5L, ANXA1, HMGCS1, PHB, AIFM1, OXCT1, HMGB1, ASNS, FN1, EIF6, YWHAG, CBX3, CAD, PRKDC, PPAT, NCOA5, BAX, NAMPT, ATP6V1C1, PPP5C, THRAP3, RBM14, DSG2, LONP1, MAPK3, ATP2A2…
regulation of cell death	0.00203951	GO:0010941	132	103.758	1460	LDHA, RSL1D1, DNAJA3, UBE2M, PPP2R1A, YWHAB, HSP90AB1, RPS6KA3, GSTP1, AARS, DDX3X, HMGB2, MTDH, HSPH1, PHB2, DNM2, RPS3A, SCRIB, NPM1, EEF1A2, SRSF6, CIAPIN1, SFPQ, HNRNPK, MRE11A, PAK2, RPS27A, RBM25, HYOU1, PDCD6, YWHAQ, MAD2L1, ACTN4, RAC1, PDIA3, PPP1CA, PA2G4, PTPA, DAD1, ATAD3A, SLK, AIMP2, CTNNBL1, USP47, ANXA1, BCLAF1, NDUFA13, GPI, YWHAE, PHB, AIFM1, HMGB1, DNM1L, SERBP1, ADNP, ASNS, DH…
glutamine family amino acid biosynthetic process	0.00207204	GO:0009084	6	1.42134	20	GLUD1, ASS1, GLS, OAT, CAD, ALDH18A1
regulation of translation in response to stress	0.00207204	GO:0043555	6	1.42134	20	RPS6KA3, RBM4, NPM1, PPP1CA, EIF2S1, EIF2AK2
pyrimidine nucleoside monophosphate metabolic process	0.00209038	GO:0009129	5	0.994941	14	TYMS, SHMT1, CMPK1, CAD, UMPS
negative regulation of telomere maintenance via telomere lengthening	0.00209038	GO:1904357	5	0.994941	14	HNRNPC, NAT10, PARP1, HNRNPA1, HNRNPU
ER-associated ubiquitin-dependent protein catabolic process	0.00214983	GO:0030433	12	4.69044	66	CCDC47, PSMC3, STT3B, PSMC5, VCP, PSMC2, PSMC1, KIAA0368, PSMC4, DNAJC10, PSMC6, HSP90B1
establishment of spindle localization	0.00218192	GO:0051293	8	2.41629	34	KPNB1, MAP4, MYH9, DYNC1H1, CLASP1, ARHGEF2, NUMA1, PAFAH1B1
binding of sperm to zona pellucida	0.00218192	GO:0007339	8	2.41629	34	CCT3, CCT7, UBAP2L, CCT5, TCP1, CCT4, CCT8, CCT2
carboxylic acid biosynthetic process	0.00223317	GO:0046394	31	18.0511	254	HSD17B12, GLUD1, ACOT7, DHFR, SHMT1, ASS1, ACSL3, PKM, ACACA, FASN, GLS, ANXA1, OAT, PRKAG1, ASNS, SHMT2, EIF6, CAD, HSD17B4, ACLY, AASDHPPT, HACD3, PHGDH, MTHFD1, PTGES3, AKR1A1, CBR1, ABCD3, GOT2, LTA4H, ALDH18A1
modulation by symbiont of host cellular process	0.00225978	GO:0044068	7	1.91881	27	KPNB1, SLC25A6, KPNA3, VAPA, KPNA2, KPNA1, KPNA4
regulation of cellular component biogenesis	0.00228113	GO:0044087	75	54.0111	760	SPTBN1, SPTBN2, PDLIM5, RPL13A, EZR, CAPZB, PTPN11, NCLN, CNOT1, DDX3X, DNM2, MAPRE1, NPM1, SEPT9, TBC1D15, ATXN2L, ACTR3, HCFC1, HSP90AA1, RAB1B, RAB7A, RAC1, ACTR2, CAND1, PFN1, TWF1, PSMC3, SLK, MAP4, BCLAF1, ARPC4, GMFB, ARPC1A, CORO1C, HMGB1, CORO1B, DNM1L, ADNP, SEC24B, MSN, CAPZA2, RAP1B, HSPA1A, RPA1, CLASP1, NAPA, CLU, BAX, PSMC5, EPS8L2, RBM14, RCC2, VDAC3, RACK1, ARPC2, ADD1, CUL4B, VC…
regulation of signal transduction by p53 class mediator	0.00233149	GO:1901796	22	11.4418	161	PRMT5, SUPT16H, RBBP7, HNRNPK, MRE11A, RPS27A, DDX5, CDK2, CSNK2A2, CHD4, RFC5, PRKAG1, RFC2, PSMD10, RFC3, RPA1, CSNK2A1, RAD50, SSRP1, MTA2, HDAC2, RBBP4
cytoplasmic microtubule organization	0.00235766	GO:0031122	9	2.98482	42	EZR, KPNB1, SLK, TUBGCP2, CLASP1, TUBG1, ATAD1, VPS4A, PAFAH1B1
ER-nucleus signaling pathway	0.00235766	GO:0006984	9	2.98482	42	EIF2A, CCDC47, ASNS, LMNA, TMEM33, ATP2A2, PTPN1, EIF2S1, HSP90B1
protein import into nucleus, translocation	0.00237529	GO:0000060	10	3.55336	50	IPO5, HSP90AB1, PHB2, HSP90AA1, KPNB1, IPO4, POLA2, TNPO1, RAN, CDK1
malate metabolic process	0.00239276	GO:0006108	4	0.639605	9	FH, MDH1, MDH2, ME2
establishment of viral latency	0.00239276	GO:0019043	4	0.639605	9	PSIP1, XRCC5, PPIA, XRCC6
Bergmann glial cell differentiation	0.00239276	GO:0060020	4	0.639605	9	PTPN11, VIM, MAPK1, MAPK3
DNA endoreduplication	0.00239276	GO:0042023	4	0.639605	9	MRE11A, SMC1A, STAG2, SMC3
nucleobase transport	0.00239276	GO:0015851	4	0.639605	9	SLC25A6, SLC25A5, VDAC3, SLC25A4
aldehyde catabolic process	0.00239276	GO:0046185	4	0.639605	9	ESD, GPI, AKR1A1, ADH5
pigment metabolic process	0.002453	GO:0042440	12	4.7615	67	PRPS1, GMPS, BLVRA, GART, SHMT1, CPOX, AP3D1, PPAT, PAICS, APRT, HPRT1, UROD
alpha-amino acid catabolic process	0.002453	GO:1901606	12	4.7615	67	GLUD1, FAH, SHMT1, GLS, OAT, DLD, AHCY, PPAT, GOT2, OGDH, GCDH, ALDH7A1
cytoskeleton organization	0.00256268	GO:0007010	98	74.1942	1044	SPTBN1, SPTBN2, XPO1, MYO1B, PPP2R1A, EZR, CAPZB, CNN3, CKAP5, DPYSL2, MAPRE1, NPM1, CNP, KRT17, WDR1, ACTR3, SLC16A1, KPNB1, CDK2, ACTN4, RAC1, ACTR2, VIM, PFN1, CUL3, FLII, TWF1, MAPK1, DOCK7, SLK, CAPN2, ANXA1, MAP4, ARPC4, GMFB, CHD4, LARP4, TBCE, CAP1, ARPC1A, KIF11, CORO1C, CORO1B, MYH9, FLNB, LMNA, ACTN1, TUBGCP2, CHORDC1, CAPZA2, MYH10, CSNK1A1, DIAPH1, NTMT1, CFL1, DYNC1H1, CLASP1, EPB41…
negative regulation of cellular component organization	0.00257604	GO:0051129	60	41.5743	585	SPTBN1, SPTBN2, RPL13A, CAPZB, DDX3X, VAT1, DNM2, BUB3, MAPRE1, NPM1, CLTC, MAD2L1, OTUB1, ACTN4, RAC1, VIM, PFN1, TWF1, ANXA2, HNRNPC, MAP4, CSNK2A2, GMFB, AP2M1, CORO1C, HMGB1, CORO1B, LMNA, PICALM, CAPZA2, MSH2, HSPA1A, PSMD10, SLC25A5, CLASP1, CSNK2A1, CLU, NAT10, RBM14, RAD50, XRCC5, RCC2, STAT1, ARHGEF2, RACK1, ADD1, TIGAR, HDAC2, DNMT1, TRIP12, STRAP, PARP1, DYNC1LI1, SPTAN1, CARM1, HNRNPA…
transferrin transport	0.00265499	GO:0033572	8	2.48735	35	ATP6V1B2, DNM2, ATP6V1A, CLTC, ATP6V1H, ATP6V1C1, RAB11B, ATP6AP1
negative regulation of nitrogen compound metabolic process	0.00271853	GO:0051172	131	103.687	1459	RBMX, XPO1, DNAJA3, RPL13A, RPS14, SLIRP, EZR, YWHAB, TRIM28, PRMT5, SRSF2, USP9X, HNRNPD, SRSF7, MSH6, RBM4, CNOT9, CNOT1, DDX3X, HMGB2, PSPC1, SMARCA4, MTDH, ENO1, PHB2, SUPT5H, PDS5A, HIST1H4A, CTBP2, SMARCA5, RBBP7, SRSF6, SFPQ, HNRNPK, MRE11A, CLTC, RPS27A, SYNCRIP, RPS13, DDX5, HCFC1, YWHAQ, HIST1H2AG, OTUB1, PABPC1, PA2G4, CUL3, EIF4A3, UBE2I, PSMC3, HNRNPC, EIF3E, U2AF2, UPF1, USP47, EPRS…
Fc-gamma receptor signaling pathway	0.0027747	GO:0038094	15	6.75139	95	HSP90AB1, ACTR3, HSP90AA1, RAC1, ACTR2, MAPK1, CYFIP2, ARPC4, ARPC1A, ACTG1, MAPK3, ARPC2, PLCG1, ARPC1B, ARPC3
glyoxylate metabolic process	0.00283057	GO:0046487	7	1.98988	28	PDHA1, IDH2, IDH1, DLAT, DLD, PDHB, OGDH
glycogen catabolic process	0.00283057	GO:0005980	7	1.98988	28	PYGB, PPP1CB, PPP1CA, HMGB1, PGM2, PYGL, PGM1
ephrin receptor signaling pathway	0.002837	GO:0048013	14	6.11178	86	PTPN11, ACTR3, RAC1, ACTR2, AP2B1, ARPC4, AP2M1, ARPC1A, AP2A2, ACTG1, ARPC2, AP2A1, ARPC1B, ARPC3
cellular response to hydrogen peroxide	0.00284756	GO:0070301	13	5.47218	77	HSPH1, ANXA1, AIFM1, PPP5C, RACK1, CDK1, HDAC2, STK25, AKR1B1, RPS3, APEX1, TRAP1, SETX
establishment of monopolar cell polarity	0.00295288	GO:0061162	5	1.06601	15	EZR, SCRIB, MSN, MAP1B, FSCN1
acetyl-CoA biosynthetic process from pyruvate	0.00295288	GO:0006086	5	1.06601	15	PDHA1, DLAT, DLD, PDK3, PDHB
chaperone-mediated protein complex assembly	0.00295288	GO:0051131	5	1.06601	15	HSP90AA1, CLU, LONP1, HSPD1, CCT2
regulation of apoptotic signaling pathway	0.00297393	GO:2001233	40	25.4421	358	PPP2R1A, YWHAB, GSTP1, DDX3X, HMGB2, HSPH1, SFPQ, HNRNPK, PAK2, HYOU1, YWHAQ, PDIA3, PPP1CA, USP47, BCLAF1, NDUFA13, YWHAE, DNM1L, LMNA, NMT1, YWHAG, HSPA1A, PSMD10, SLC25A5, DYNLL1, CLU, BAX, ERP29, ARHGEF2, RACK1, PTPN1, CCAR2, RPS3, CTNNA1, TPT1, FAM162A, TRAP1, ACAA2, NONO, PSME3
ATP hydrolysis coupled transmembrane transport	0.00320447	GO:0090662	8	2.55842	36	ATP6V1B2, ATP5A1, ATP6V1A, ATP6V1H, ATP5B, ATP6V1C1, ATP6AP1, ATP1A1
pteridine-containing compound metabolic process	0.00320447	GO:0042558	8	2.55842	36	TYMS, ATIC, DHFR, GART, SHMT1, SHMT2, MTHFD1, GGH
GMP biosynthetic process	0.00320899	GO:0006177	3	0.355336	5	IMPDH2, GMPS, HPRT1
negative regulation of mitochondrial outer membrane permeabilization involved in apoptotic signaling pathway	0.00320899	GO:1901029	3	0.355336	5	HSPA1A, SLC25A5, ACAA2
snoRNA localization	0.00320899	GO:0048254	3	0.355336	5	PRPF31, NOP58, FBL
phenylalanyl-tRNA aminoacylation	0.00320899	GO:0006432	3	0.355336	5	FARSA, LRRC47, FARSB
chaperone cofactor-dependent protein refolding	0.00320899	GO:0070389	3	0.355336	5	DNAJC7, PTGES3, ST13
meiotic chromosome condensation	0.00320899	GO:0010032	3	0.355336	5	NCAPD2, SMC2, SMC4
meiotic spindle organization	0.00320899	GO:0000212	3	0.355336	5	PPP2R1A, MYH9, TUBG1
actin filament depolymerization	0.00321518	GO:0030042	10	3.6955	52	SPTBN1, SPTBN2, CAPZB, WDR1, TWF1, CAPZA2, CFL1, DSTN, ADD1, SPTAN1
regulation of gene expression	0.00329037	GO:0010468	340	299.904	4220	RBMX, PARN, ANXA3, XPO1, EIF2A, RNASEH2B, DNAJA3, RPL13A, TYMS, PSMD3, DDX6, PPP2R1A, RPS14, SLIRP, EZR, FUBP3, YWHAB, SEH1L, TRIM28, PSMB2, PRMT5, SRSF2, USP9X, HNRNPD, SRSF7, PSMD14, RPS6KA3, HNRNPH1, RBM4, AARS, PSMD11, EIF4H, CNOT9, TRIM25, CNOT1, HNRNPDL, EIF3L, AAAS, DDX3X, HMGB2, PSMB5, PSPC1, SMARCA4, MTDH, SAFB, HSPH1, ENO1, EEF1A1, GFPT1, PHB2, PSMA4, DNM2, SUPT5H, NUP153, SUPT16H, EIF3…
positive regulation of catalytic activity	0.00331157	GO:0043085	135	107.88	1518	SPTBN1, SPTBN2, GAPVD1, PSMD3, YWHAB, HSP90AB1, PSMB2, ARHGAP1, PTPN11, PSMD14, MSH6, PSMD11, DDX3X, HMGB2, PSMB5, CAB39, HSPH1, PSMA4, DNM2, SPAG9, BUB3, SCRIB, UBA2, DHFR, EEF1A2, MRE11A, PAK2, RPS27A, PSMA7, SKP1, TBC1D15, PDCD6, PGAM5, PSMD8, MAD2L1, ARL1, RAC1, ASPH, PFN1, PTPA, UBE2I, PSMC3, IQGAP1, MAPK1, DOCK7, RPS2, DCUN1D5, CYFIP2, NDUFA13, PCNA, GMFB, CAP1, PSMB4, RFC5, AIFM1, PRKAG1, …
response to endogenous stimulus	0.0033333	GO:0009719	136	108.804	1531	LDHA, ANXA3, AK2, IPO5, HADHA, UBE2M, TYMS, ATP6V1B2, EZR, PSMB2, PTPN11, USP9X, HNRNPD, SRSF5, GSTP1, HNRNPH1, AARS, CNOT9, CNOT1, HMGB2, DPYSL2, SMARCA4, RAB10, SAFB, EEF1A1, GFPT1, PHB2, DNM2, GSS, DHFR, RBBP7, ATP6V1A, LEMD3, SORD, HNRNPK, RPS27A, CYC1, BSG, DDX5, ASS1, PRCP, ADSS, PKM, EEF2, DDX17, CDK2, ACACA, TMED10, IDH1, ATP6V1H, EFTUD2, HNRNPM, EIF4A3, ANXA2, IQGAP1, MAPK1, CAPN2, CDC5L…
RNA phosphodiester bond hydrolysis	0.00345608	GO:0090501	18	8.95447	126	PARN, RNASEH2B, POP1, CNOT1, CSTF1, PNPT1, EXOSC2, CPSF2, FEN1, RPSA, HSPA1A, CSTF3, DIS3, NCBP1, APEX1, MRPL44, ELAC2, XRN2
intracellular signal transduction involved in G1 DNA damage checkpoint	0.00346484	GO:1902400	11	4.3351	61	CNOT9, CNOT1, NPM1, RPS27A, CDK2, PCNA, PRKDC, BAX, CDK1, CARM1, PRMT1
signal transduction involved in mitotic G1 DNA damage checkpoint	0.00346484	GO:0072431	11	4.3351	61	CNOT9, CNOT1, NPM1, RPS27A, CDK2, PCNA, PRKDC, BAX, CDK1, CARM1, PRMT1
cellular polysaccharide catabolic process	0.00350549	GO:0044247	7	2.06095	29	PYGB, PPP1CB, PPP1CA, HMGB1, PGM2, PYGL, PGM1
glucan catabolic process	0.00350549	GO:0009251	7	2.06095	29	PYGB, PPP1CB, PPP1CA, HMGB1, PGM2, PYGL, PGM1
regulation of vacuolar transport	0.00350549	GO:1903335	7	2.06095	29	EZR, MAPK1, MSN, MAPK3, EHD1, VPS35, RAB11B
vesicle-mediated transport to the plasma membrane	0.00350549	GO:0098876	7	2.06095	29	RAB10, DNM2, VPS26A, EXOC2, VPS35, VPS29, RAB11B
apoptotic nuclear changes	0.00350549	GO:0030262	7	2.06095	29	HMGB2, KPNB1, AIFM1, HMGB1, BAX, TARDBP, KPNA1
water-soluble vitamin metabolic process	0.00352371	GO:0006767	14	6.25391	88	NAXE, DHFR, SHMT1, CYB5R3, ACACA, FASN, SHMT2, AASDHPPT, MTHFD1, AKR1A1, NAMPT, SLC2A1, MCCC2, PCCB
positive regulation of type I interferon production	0.00357695	GO:0032481	12	4.9747	70	DDX3X, HMGB2, ZC3HAV1, MRE11A, HMGB1, PRKDC, XRCC5, HSPD1, XRCC6, POLR2H, DHX9, DHX36
immune system process	0.0036753	GO:0002376	206	173.475	2441	ANXA3, SPTBN2, DNAJA3, CLPTM1, RPL13A, PSMD3, RPS14, GNAS, EZR, IPO7, HSP90AB1, TRIM28, PSMB2, IMPDH2, SEC31A, PTPN11, PSMD14, RPS6KA3, MSH6, PSMD11, TRIM25, DDX3X, HMGB2, PSMB5, RAB10, HSPH1, PHB2, PSMA4, DNM2, RPS24, CTSD, HIST1H4A, SEC13, CIAPIN1, ZC3HAV1, HNRNPK, PAK2, ABCF3, CLTC, RPS27A, PSMA7, SYNCRIP, SKP1, BSG, SEC24A, ASS1, ACTR3, MDH1, SLC16A1, ADSS, HSP90AA1, AP3B1, PSMD8, EEF2, SART1…
regulation of apoptotic process	0.0037155	GO:0042981	122	96.5093	1358	LDHA, RSL1D1, UBE2M, PPP2R1A, YWHAB, HSP90AB1, RPS6KA3, GSTP1, AARS, DDX3X, HMGB2, MTDH, HSPH1, PHB2, DNM2, RPS3A, SCRIB, NPM1, EEF1A2, CIAPIN1, SFPQ, HNRNPK, MRE11A, PAK2, RPS27A, RBM25, HYOU1, PDCD6, YWHAQ, MAD2L1, ACTN4, RAC1, PDIA3, PPP1CA, PA2G4, PTPA, DAD1, ATAD3A, SLK, CTNNBL1, USP47, ANXA1, BCLAF1, NDUFA13, GPI, YWHAE, PHB, AIFM1, HMGB1, DNM1L, SERBP1, ADNP, ASNS, DHRS2, LMNA, ACTN1, FN1,…
gene silencing by miRNA	0.00371551	GO:0035195	10	3.76656	53	RBM4, CNOT1, EIF6, SRRT, FXR1, RAN, XPO5, HNRNPA2B1, ADAR, MRPL44
positive regulation of homeostatic process	0.00374935	GO:0032846	26	14.853	209	HMGB2, SMARCA4, CCT3, MRE11A, SEC24A, CCT7, GNL3, MAPK1, ANXA1, CCT6A, OXCT1, CCT5, TCP1, BAX, MAPK3, RAD50, CCT4, DKC1, PLCG1, PHPT1, ATP6AP1, CCT8, DHX36, HNRNPA1, PRMT1, CCT2
mitotic nuclear envelope reassembly	0.00376431	GO:0007084	4	0.710672	10	PPP2R1A, LMNA, EMD, PPP2R2A
peptidyl-arginine N-methylation	0.00376431	GO:0035246	4	0.710672	10	PRMT5, WDR77, CARM1, PRMT1
DNA unwinding involved in DNA replication	0.00376431	GO:0006268	4	0.710672	10	MCM6, MCM4, MCM7, MCM2
positive regulation of establishment of protein localization	0.00378595	GO:1904951	52	35.6047	501	SPTBN1, IPO5, EZR, YWHAB, HSP90AB1, GLUD1, TRIM28, KIF5B, HUWE1, SEC24A, YWHAQ, HSP90AA1, ACSL3, U2AF1, PSMD8, CCT7, RER1, HNRNPM, U2AF2, CSNK2A2, CCT6A, YWHAE, OXCT1, HMGB1, RUVBL1, DNM1L, NMT1, YWHAG, CCT5, TCP1, ANP32B, TMEM30A, DYNLL1, TARDBP, NPEPPS, ACTL6A, EMD, RACK1, CCT4, VPS35, FLNA, PSMB7, DKC1, PPIA, CDK1, JUP, NCL, PHPT1, PARP1, SAE1, CCT8, CCT2
regulation of lamellipodium organization	0.00383829	GO:1902743	8	2.62949	37	CAPZB, DNM2, HSP90AA1, RAC1, CORO1C, CORO1B, ARPC2, FSCN1
one-carbon metabolic process	0.00383829	GO:0006730	8	2.62949	37	TYMS, DHFR, MAT2B, SHMT1, SHMT2, AHCY, MAT2A, MTHFD1
actin nucleation	0.00386813	GO:0045010	9	3.19802	45	ACTR3, ACTR2, ARPC4, GMFB, ARPC1A, CORO1B, ARPC2, ARPC1B, ARPC3
maturation of SSU-rRNA	0.00386813	GO:0030490	9	3.19802	45	RPS14, RPS24, BYSL, MRPS9, RPSA, RPS19, RPS16, EMG1, RPS8
signal transduction involved in mitotic cell cycle checkpoint	0.00394762	GO:0072413	11	4.40617	62	CNOT9, CNOT1, NPM1, RPS27A, CDK2, PCNA, PRKDC, BAX, CDK1, CARM1, PRMT1
signal transduction involved in mitotic DNA damage checkpoint	0.00394762	GO:1902402	11	4.40617	62	CNOT9, CNOT1, NPM1, RPS27A, CDK2, PCNA, PRKDC, BAX, CDK1, CARM1, PRMT1
signal transduction involved in mitotic DNA integrity checkpoint	0.00394762	GO:1902403	11	4.40617	62	CNOT9, CNOT1, NPM1, RPS27A, CDK2, PCNA, PRKDC, BAX, CDK1, CARM1, PRMT1
regulation of protein depolymerization	0.00403247	GO:1901879	12	5.04577	71	SPTBN1, SPTBN2, CAPZB, WDR1, ASPH, TWF1, CAPZA2, CLASP1, ARHGEF2, DSTN, ADD1, SPTAN1
organic acid biosynthetic process	0.00403566	GO:0016053	32	19.5435	275	HSD17B12, GLUD1, ACOT7, DHFR, SHMT1, ASS1, ACSL3, PKM, ACACA, FASN, GLS, ANXA1, OAT, PRKAG1, ASNS, SHMT2, EIF6, AHCY, CAD, HSD17B4, ACLY, AASDHPPT, HACD3, PHGDH, MTHFD1, PTGES3, AKR1A1, CBR1, ABCD3, GOT2, LTA4H, ALDH18A1
positive regulation of lamellipodium assembly	0.00404509	GO:0010592	5	1.13708	16	DNM2, HSP90AA1, RAC1, ARPC2, FSCN1
establishment or maintenance of monopolar cell polarity	0.00404509	GO:0061339	5	1.13708	16	EZR, SCRIB, MSN, MAP1B, FSCN1
response to drug	0.00423187	GO:0042493	46	30.8432	434	LDHA, SRP54, XPO1, HADHA, TYMS, GNAS, HNRNPD, HMGB2, SRP68, DPYSL2, SORD, ASS1, EEF2, CDK2, CTPS1, RPN2, SRP14, EFTUD2, DAD1, SRP72, USP47, ANXA1, HMGCS1, OXCT1, CDK9, CAD, BLMH, CDK4, PPAT, TMEM30A, NDUFA10, BAX, PNP, MCM7, MYO6, ABCD3, POR, CDK1, HDAC2, DNMT1, UMPS, TOP1, UQCRFS1, GGH, ATP1A1, APEX1
protein insertion into mitochondrial membrane involved in apoptotic signaling pathway	0.00429605	GO:0001844	7	2.13202	30	YWHAB, YWHAQ, YWHAE, NMT1, YWHAG, DYNLL1, BAX
positive regulation of peptidase activity	0.00441419	GO:0010952	20	10.589	149	PSMD14, DDX3X, PDCD6, ASPH, CYFIP2, NDUFA13, AIFM1, HMGB1, FN1, PICALM, ANP32B, BAX, RPS27L, RACK1, HSPD1, CYCS, VCP, RPS3, FAM162A, PSME3
cellular response to reactive oxygen species	0.00445633	GO:0034614	18	9.16767	129	HNRNPD, HSPH1, DNM2, DHFR, CDK2, ANXA1, AIFM1, PPP5C, RACK1, CDK1, HDAC2, STK25, AKR1B1, RPS3, APEX1, TRAP1, PRDX3, SETX
DNA catabolic process, endonucleolytic	0.00449073	GO:0000737	6	1.63455	23	HMGB2, KPNB1, AIFM1, HMGB1, BAX, KPNA1
positive regulation of mRNA catabolic process	0.00449073	GO:0061014	6	1.63455	23	CNOT1, ZC3HAV1, PNPT1, PABPC1, UPF1, HNRNPR
nucleobase-containing small molecule interconversion	0.00449073	GO:0015949	6	1.63455	23	AK2, CTPS1, GSR, CMPK1, RRM1, AK1
positive regulation of molecular function	0.0045008	GO:0044093	155	127.068	1788	SPTBN1, ANXA3, SPTBN2, GAPVD1, PSMD3, YWHAB, HSP90AB1, PSMB2, ARHGAP1, PTPN11, PSMD14, MSH6, PSMD11, CNOT9, TRIM25, DDX3X, HMGB2, PSMB5, SMARCA4, CAB39, MTDH, HSPH1, ENO1, PHB2, PSMA4, DNM2, SPAG9, BUB3, MAPRE1, SCRIB, UBA2, NPM1, CTBP2, DHFR, EEF1A2, MRE11A, PAK2, RPS27A, PSMA7, SKP1, TBC1D15, PDCD6, STIM1, PGAM5, PSMD8, MAD2L1, ARL1, ACTN4, RAC1, ASPH, PFN1, PTPA, UBE2I, PSMC3, ANXA2, IQGAP1, M…
mitotic spindle organization	0.00451181	GO:0007052	9	3.26909	46	PTPA, MAP4, KIF11, SMC1A, DYNC1H1, CLASP1, DCTN2, RAN, SMC3
actin filament-based process	0.00453277	GO:0030029	62	44.3459	624	SPTBN1, SPTBN2, MYO1B, EZR, CAPZB, CNN3, WDR1, ACTR3, ACTN4, RAC1, ACTR2, VIM, PFN1, CUL3, FLII, TWF1, ANXA1, ARPC4, GMFB, CAP1, ARPC1A, CORO1C, CORO1B, MYH9, FLNB, ACTN1, CAPZA2, MYH10, DIAPH1, CFL1, CLASP1, EPB41L3, ILK, DYNLL1, ACTG1, NUP155, MYO6, DSG2, ATP2A2, DBN1, ARHGEF2, DSTN, ARPC2, ADD1, PTPN1, KRT8, RAN, FLNA, JUP, TLN1, PHPT1, DSP, FSCN1, SPTAN1, MYL6, CTNNA1, ARPC1B, ATP1A1, ALDOA, …
virion assembly	0.00456465	GO:0019068	8	2.70055	38	DDX6, VTA1, RPS27A, RAB1B, RAB1A, PPIA, PDCD6IP, VPS4A
negative regulation of chromosome organization	0.0045737	GO:2001251	15	7.10672	100	BUB3, MAD2L1, OTUB1, HNRNPC, CSNK2A2, CSNK2A1, NAT10, RAD50, XRCC5, DNMT1, TRIP12, PARP1, DYNC1LI1, HNRNPA1, HNRNPU
monocarboxylic acid catabolic process	0.0045737	GO:0072329	15	7.10672	100	DECR1, HADHA, SORD, ETFB, ALDH3A2, HSD17B4, ETFA, AKR1A1, ABCD3, HADHB, ACAD9, PCCB, ECHS1, ACOX1, GCDH
NADH dehydrogenase complex assembly	0.00490338	GO:0010257	10	3.9087	55	NDUFC2, NDUFA9, NDUFA13, NDUFB4, NDUFS2, NDUFA10, NDUFV1, ACAD9, NDUFS1, BCS1L
mitochondrial respiratory chain complex I assembly	0.00490338	GO:0032981	10	3.9087	55	NDUFC2, NDUFA9, NDUFA13, NDUFB4, NDUFS2, NDUFA10, NDUFV1, ACAD9, NDUFS1, BCS1L
mitochondrial respiratory chain complex I biogenesis	0.00490338	GO:0097031	10	3.9087	55	NDUFC2, NDUFA9, NDUFA13, NDUFB4, NDUFS2, NDUFA10, NDUFV1, ACAD9, NDUFS1, BCS1L
double-strand break repair	0.00491191	GO:0006302	24	13.6449	192	PSMD14, HIST1H4A, SMARCA5, SFPQ, MRE11A, OTUB1, FEN1, DEK, TRIP13, MSH2, PRKDC, RPA1, RAD50, XRCC5, POLA1, VCP, XRCC6, DDX1, TRIP12, PARP1, RECQL, PRPF19, RIF1, SETX
multi-organism nuclear import	0.00504657	GO:1902594	2	0.142134	2	NUP153, KPNA3
dTMP biosynthetic process	0.00504657	GO:0006231	2	0.142134	2	TYMS, SHMT1
glyoxylate cycle	0.00504657	GO:0006097	2	0.142134	2	IDH2, IDH1
mitochondrial mRNA catabolic process	0.00504657	GO:0000958	2	0.142134	2	PNPT1, SUPV3L1
fructose biosynthetic process	0.00504657	GO:0046370	2	0.142134	2	SORD, AKR1B1
leading strand elongation	0.00504657	GO:0006272	2	0.142134	2	PCNA, POLA1
tyrosyl-tRNA aminoacylation	0.00504657	GO:0006437	2	0.142134	2	YARS2, YARS
response to rapamycin	0.00504657	GO:1901355	2	0.142134	2	HNRNPD, HNRNPK
urate biosynthetic process	0.00504657	GO:0034418	2	0.142134	2	PRPS1, PNP
positive regulation of protein deubiquitination	0.00504657	GO:1903003	2	0.142134	2	VCP, SART3
Golgi vesicle docking	0.00504657	GO:0048211	2	0.142134	2	NSF, USO1
formaldehyde catabolic process	0.00504657	GO:0046294	2	0.142134	2	ESD, ADH5
sorbitol metabolic process	0.00504657	GO:0006060	2	0.142134	2	SORD, AKR1B1
positive regulation of mitochondrial RNA catabolic process	0.00504657	GO:0000962	2	0.142134	2	PNPT1, SUPV3L1
pre-miRNA export from nucleus	0.00504657	GO:0035281	2	0.142134	2	RAN, XPO5
regulation of growth plate cartilage chondrocyte proliferation	0.00504657	GO:0003420	2	0.142134	2	POR, CARM1
glycine biosynthetic process from serine	0.00504657	GO:0019264	2	0.142134	2	SHMT1, SHMT2
T cell mediated immune response to tumor cell	0.00504657	GO:0002424	2	0.142134	2	HMGB1, HSPD1
diphosphate metabolic process	0.00504657	GO:0071344	2	0.142134	2	PPA2, PPA1
co-translational protein modification	0.00504657	GO:0043686	2	0.142134	2	STT3B, STT3A
isoleucyl-tRNA aminoacylation	0.00504657	GO:0006428	2	0.142134	2	IARS2, IARS
posttranscriptional tethering of RNA polymerase II gene DNA at nuclear periphery	0.00504657	GO:0000973	2	0.142134	2	NUP98, NUP107
protein unfolding	0.00504657	GO:0043335	2	0.142134	2	HSP90AA1, ERP29
neutrophil clearance	0.00504657	GO:0097350	2	0.142134	2	ANXA1, HMGB1
viral penetration into host nucleus	0.00504657	GO:0075732	2	0.142134	2	NUP153, KPNA3
dTMP metabolic process	0.00504657	GO:0046073	2	0.142134	2	TYMS, SHMT1
regulation of T cell mediated immune response to tumor cell	0.00504657	GO:0002840	2	0.142134	2	HMGB1, HSPD1
cis assembly of pre-catalytic spliceosome	0.00504657	GO:0000354	2	0.142134	2	SNRNP200, DDX23
negative regulation of mitochondrial RNA catabolic process	0.00504657	GO:0000961	2	0.142134	2	SLIRP, LRPPRC
polysaccharide catabolic process	0.00521845	GO:0000272	7	2.20308	31	PYGB, PPP1CB, PPP1CA, HMGB1, PGM2, PYGL, PGM1
DNA catabolic process	0.00521845	GO:0006308	7	2.20308	31	HMGB2, KPNB1, AIFM1, HMGB1, BAX, KPNA1, XRN2
protein insertion into mitochondrial membrane	0.00521845	GO:0051204	7	2.20308	31	YWHAB, YWHAQ, YWHAE, NMT1, YWHAG, DYNLL1, BAX
intra-Golgi vesicle-mediated transport	0.00523581	GO:0006891	9	3.34016	47	COPB2, COPB1, COPG2, NSF, COPE, GOSR2, NAPA, COPA, RAB6A
cellular component disassembly involved in execution phase of apoptosis	0.00523581	GO:0006921	9	3.34016	47	HMGB2, KPNB1, STK24, AIFM1, HMGB1, DNM1L, BAX, TARDBP, KPNA1
regulation of autophagy	0.0052942	GO:0010506	29	17.5536	247	CAPN1, ATP6V1B2, CAPNS1, MTDH, EEF1A1, SUPT5H, EEF1A2, ATP6V1A, VPS26A, U2AF1, USP10, RAB1B, RAB7A, ATP6V1H, UCHL1, U2AF2, CSNK2A2, HMGB1, RUVBL1, DNM1L, CISD2, SNRNP70, ATP6V1C1, ACTL6A, MAPK3, TIGAR, VPS35, SPTLC1, LARP1
protein homooligomerization	0.00530707	GO:0051260	30	18.3353	258	RBMX, DECR1, NAXE, IMPDH2, ANXA6, GFPT1, SPAG9, PFKL, PNPT1, SHMT1, ACACA, GLS, HSD17B10, DNM1L, SHMT2, ATXN10, CLPP, PPAT, CLU, BAX, LONP1, RACK1, EHD1, ACAT1, VCP, IDE, HPRT1, EHD4, ST13, ALDOA
sulfur compound metabolic process	0.00535705	GO:0006790	39	25.5131	359	PDHA1, HSD17B12, TXNL1, GSTP1, AGK, SULT1A1, GSS, ACOT7, CIAPIN1, MAT2B, MPST, ACSL3, ACACA, FASN, IDH1, GSR, SLC25A1, NUBP2, DLAT, ESD, ACOT9, ACSL4, DLD, G6PD, AHCY, HSD17B4, EEF1G, ACLY, MAT2A, PHGDH, MTHFD1, AKR1A1, SLC25A10, DNMT1, PDK3, CLIC1, PDHB, OGDH, GCDH
ferric iron transport	0.00539196	GO:0015682	8	2.77162	39	ATP6V1B2, DNM2, ATP6V1A, CLTC, ATP6V1H, ATP6V1C1, RAB11B, ATP6AP1
trivalent inorganic cation transport	0.00539196	GO:0072512	8	2.77162	39	ATP6V1B2, DNM2, ATP6V1A, CLTC, ATP6V1H, ATP6V1C1, RAB11B, ATP6AP1
serine family amino acid biosynthetic process	0.00540528	GO:0009070	5	1.20814	17	DHFR, SHMT1, SHMT2, PHGDH, MTHFD1
regulation of cellular metabolic process	0.00542866	GO:0031323	446	405.225	5702	RBMX, ANXA3, PDHA1, XPO1, EIF2A, DNAJA3, RPL13A, TYMS, PSMD3, DDX6, PPP2R1A, RPS14, SLIRP, EZR, FUBP3, YWHAB, HSP90AB1, TRIM28, PSMB2, PRMT5, PTPN11, SRSF2, USP9X, HNRNPD, SRSF7, PSMD14, RPS6KA3, GSTP1, MSH6, HNRNPH1, RBM4, AARS, PSMD11, EIF4H, CNOT9, TRIM25, CNOT1, HNRNPDL, EIF3L, DDX3X, HMGB2, PSMB5, PSPC1, SMARCA4, CAB39, MTDH, SAFB, HSPH1, ENO1, EEF1A1, GFPT1, PHB2, PSMA4, DNM2, CCT3, SPAG9, …
response to peptide hormone	0.00551533	GO:0043434	42	28.0005	394	HADHA, ATP6V1B2, PTPN11, SRSF5, GSTP1, RAB10, GFPT1, ATP6V1A, HNRNPK, CYC1, BSG, ASS1, PKM, CDK2, ATP6V1H, MAPK1, CDC5L, ANXA1, EIF6, YWHAG, PRKDC, PPAT, NCOA5, NAMPT, ATP6V1C1, MAPK3, ATP2A2, STAT1, PTPN1, POR, APRT, LTA4H, IDE, PARP1, SMARCC1, ATP6AP1, GNB1, GGH, APEX1, PRKAR2A, RANGAP1, CSK
fatty acid catabolic process	0.00553266	GO:0009062	13	5.89858	83	DECR1, HADHA, ETFB, ALDH3A2, HSD17B4, ETFA, ABCD3, HADHB, ACAD9, PCCB, ECHS1, ACOX1, GCDH
innate immune response	0.0055607	GO:0045087	77	57.7066	812	RPL13A, PSMD3, IPO7, HSP90AB1, TRIM28, PSMB2, PTPN11, PSMD14, RPS6KA3, PSMD11, TRIM25, DDX3X, HMGB2, PSMB5, PSMA4, ZC3HAV1, PAK2, RPS27A, PSMA7, SYNCRIP, SKP1, ASS1, PSMD8, SRPK1, PSMC3, TUBB4B, ANXA1, EPRS, CDC37, UBE2V1, CHID1, PSMB4, AP1G1, HMGB1, SHMT2, CAPZA2, PSMD7, HSPA1A, PSMD10, HIST1H2BK, PSMF1, CLU, HLA-C, PCBP2, PSMD13, PSMC5, HLA-B, PSMD1, IFIT5, RPS19, PSMD2, STAT1, ARHGEF2, C1QBP, …
tetrahydrofolate interconversion	0.00558422	GO:0035999	4	0.781739	11	TYMS, SHMT1, SHMT2, MTHFD1
3'-UTR-mediated mRNA stabilization	0.00558422	GO:0070935	4	0.781739	11	HNRNPA0, HNRNPC, ELAVL1, TARDBP
oxaloacetate metabolic process	0.00558422	GO:0006107	4	0.781739	11	MDH1, ACLY, GOT2, MDH2
negative regulation of telomere maintenance via telomerase	0.00558422	GO:0032211	4	0.781739	11	HNRNPC, NAT10, HNRNPA1, HNRNPU
regulation of macroautophagy	0.00564368	GO:0016241	16	7.95953	112	CAPN1, ATP6V1B2, CAPNS1, SUPT5H, ATP6V1A, VPS26A, RAB1B, RAB7A, ATP6V1H, UCHL1, ATP6V1C1, MAPK3, TIGAR, VPS35, SPTLC1, LARP1
regulation of DNA repair	0.00568396	GO:0006282	12	5.25897	74	TRIM28, OTUB1, PCNA, DEK, UBE2V1, HMGB1, CDK9, TIGAR, TRIP12, RPS3, APEX1, RIF1
response to osmotic stress	0.00572416	GO:0006970	11	4.61937	65	HSP90AB1, DDX3X, CAB39, SORD, HSP90AA1, RAC1, ANXA7, SERPINB6, BAX, ARHGEF2, SLC2A1
fatty acid beta-oxidation	0.00572416	GO:0006635	11	4.61937	65	DECR1, HADHA, ETFB, HSD17B4, ETFA, ABCD3, HADHB, ACAD9, ECHS1, ACOX1, GCDH
protein depolymerization	0.00584606	GO:0051261	14	6.60925	93	SPTBN1, SPTBN2, CAPZB, WDR1, ASPH, TWF1, CAPZA2, CFL1, CLASP1, ARHGEF2, DSTN, ADD1, VPS4A, SPTAN1
actin filament organization	0.00598654	GO:0007015	35	22.4572	316	SPTBN1, SPTBN2, MYO1B, EZR, CAPZB, WDR1, ACTR3, ACTN4, RAC1, ACTR2, PFN1, CUL3, TWF1, ARPC4, GMFB, ARPC1A, CORO1B, ACTN1, CAPZA2, DIAPH1, CFL1, CLASP1, DBN1, ARHGEF2, DSTN, ARPC2, ADD1, FLNA, FSCN1, SPTAN1, CTNNA1, ARPC1B, ALDOA, HSP90B1, ARPC3
regulation of actin filament depolymerization	0.00604649	GO:0030834	9	3.41123	48	SPTBN1, SPTBN2, CAPZB, WDR1, TWF1, CAPZA2, DSTN, ADD1, SPTAN1
citrate metabolic process	0.00607249	GO:0006101	3	0.426403	6	ACO2, ACLY, ACO1
'de novo' pyrimidine nucleobase biosynthetic process	0.00607249	GO:0006207	3	0.426403	6	CMPK1, CAD, UMPS
mRNA 3'-splice site recognition	0.00607249	GO:0000389	3	0.426403	6	SF3A3, SF3A2, SF1
pyrimidine nucleobase biosynthetic process	0.00607249	GO:0019856	3	0.426403	6	CMPK1, CAD, UMPS
astral microtubule organization	0.00607249	GO:0030953	3	0.426403	6	EZR, KPNB1, CLASP1
protein localization to cell junction	0.00607249	GO:1902414	3	0.426403	6	SCRIB, ACTN4, DSP
alditol catabolic process	0.00607249	GO:0019405	3	0.426403	6	TPI1, SORD, GPD2
cardiac muscle cell-cardiac muscle cell adhesion	0.00607249	GO:0086042	3	0.426403	6	DSG2, JUP, DSP
mature ribosome assembly	0.00607249	GO:0042256	3	0.426403	6	DDX3X, EIF6, C1QBP
positive regulation of helicase activity	0.00607249	GO:0051096	3	0.426403	6	MSH6, MSH2, CHTOP
intrinsic apoptotic signaling pathway in response to hydrogen peroxide	0.00607249	GO:0036481	3	0.426403	6	HSPH1, STK25, TRAP1
regulation of DNA-directed DNA polymerase activity	0.00607249	GO:1900262	3	0.426403	6	RFC5, RFC2, RFC3
mitochondrial acetyl-CoA biosynthetic process from pyruvate	0.00607249	GO:0061732	3	0.426403	6	PDHA1, DLD, PDHB
bundle of His cell-Purkinje myocyte adhesion involved in cell communication	0.00607249	GO:0086073	3	0.426403	6	DSG2, JUP, DSP
positive regulation of DNA-directed DNA polymerase activity	0.00607249	GO:1900264	3	0.426403	6	RFC5, RFC2, RFC3
regulation of primary metabolic process	0.00608783	GO:0080090	441	400.961	5642	RBMX, ANXA3, PDHA1, XPO1, EIF2A, DNAJA3, RPL13A, TYMS, PSMD3, DDX6, PPP2R1A, RPS14, SLIRP, EZR, FUBP3, YWHAB, HSP90AB1, TRIM28, PSMB2, PRMT5, PTPN11, SRSF2, USP9X, HNRNPD, SRSF7, PSMD14, RPS6KA3, GSTP1, MSH6, HNRNPH1, RBM4, AARS, PSMD11, EIF4H, CNOT9, TRIM25, CNOT1, HNRNPDL, EIF3L, DDX3X, HMGB2, PSMB5, PSPC1, SMARCA4, CAB39, MTDH, SAFB, HSPH1, ENO1, EEF1A1, GFPT1, PHB2, PSMA4, DNM2, CCT3, SPAG9, …
negative regulation of programmed cell death	0.00631764	GO:0043069	76	57.138	804	DNAJA3, HSP90AB1, RPS6KA3, GSTP1, AARS, DDX3X, HMGB2, MTDH, HSPH1, PHB2, RPS3A, NPM1, CIAPIN1, HNRNPK, MRE11A, PAK2, RPS27A, HYOU1, MAD2L1, PA2G4, DAD1, ATAD3A, USP47, ANXA1, NDUFA13, GPI, YWHAE, ADNP, ASNS, DHRS2, LMNA, FN1, FAM129B, MSH2, PRKDC, HSPA1A, CFL1, PSMD10, PDCD4, SLC25A5, KRT18, ILK, CSNK2A1, CLU, BAG6, BAX, PSMC5, NAA15, ARHGEF2, FKBP8, RPS6, PTPN1, HSPD1, TIGAR, FLNA, POR, CDK1, AP…
base-excision repair	0.0063288	GO:0006284	8	2.84269	40	HUWE1, FEN1, USP47, HMGB1, RPA1, POLD1, RPS3, APEX1
endoplasmic reticulum organization	0.0063288	GO:0007029	8	2.84269	40	RAB10, CCDC47, TMEM33, VAPA, BAG6, SEC61A1, RTN3, LMAN1
homotypic cell-cell adhesion	0.00634011	GO:0034109	12	5.33004	75	GNAS, CSRP1, MYH9, ACTN1, ILK, ACTG1, DSG2, FLNA, JUP, TLN1, DSP, CLIC1
posttranscriptional gene silencing	0.00636695	GO:0016441	10	4.05083	57	RBM4, CNOT1, EIF6, SRRT, FXR1, RAN, XPO5, HNRNPA2B1, ADAR, MRPL44
posttranscriptional gene silencing by RNA	0.00636695	GO:0035194	10	4.05083	57	RBM4, CNOT1, EIF6, SRRT, FXR1, RAN, XPO5, HNRNPA2B1, ADAR, MRPL44
cellular response to peptide	0.0063695	GO:1901653	34	21.7466	306	ATP6V1B2, PTPN11, SRSF5, GSTP1, RAB10, GFPT1, ATP6V1A, HNRNPK, ASS1, CDK2, ATP6V1H, MAPK1, CDC5L, YWHAG, PRKDC, PPAT, NCOA5, NAMPT, ATP6V1C1, MAPK3, ARHGEF2, PTPN1, POR, APRT, IDE, PARP1, SMARCC1, AKR1B1, ATP6AP1, GNB1, APEX1, PRKAR2A, RANGAP1, CSK
Golgi organization	0.00643205	GO:0007030	14	6.68032	94	PRMT5, DNM2, GOLGB1, ARL1, TMED10, MAPK1, CSNK1A1, CLASP1, SURF4, MAPK3, RAB1A, CDK1, STK25, LMAN1
peptidyl-amino acid modification	0.00662575	GO:0018193	105	82.9354	1167	PPP2R1A, SEH1L, TRIM28, PRMT5, CFAP20, AAAS, NAA50, CAB39, HSPH1, NUP153, UBA2, NUP133, HNRNPK, PAK2, HCFC1, HSP90AA1, EEF2, CDK2, RPN2, GNL3, ASPH, PTPA, DAD1, TWF1, UBE2I, HNRNPC, MAPK1, DOCK7, NUP93, DPM1, NUP98, PCNA, CDC37, NUP210, HAT1, SCYL1, RUVBL1, EIF5A, WDR61, SMC1A, ADNP, NMT1, CAD, CSNK1A1, NTMT1, PRKDC, STAG2, RAE1, STT3B, PPIB, FKBP10, RPA1, RANBP2, METAP2, ILK, WDR5, NAA10, BAG6, …
positive regulation of mitochondrion organization	0.0066631	GO:0010822	21	11.7261	165	YWHAB, HUWE1, YWHAQ, U2AF1, PSMD8, U2AF2, CSNK2A2, YWHAE, RUVBL1, DNM1L, STOML2, NMT1, YWHAG, DYNLL1, BAX, NPEPPS, ACTL6A, C1QBP, PSMB7, SAE1, FAM162A
response to virus	0.00667022	GO:0009615	43	29.1376	410	TRIM25, DDX3X, ENO1, ZC3HAV1, PAK2, ABCF3, MDH1, RAC1, SLFN11, ATP6V1H, NUP93, AP2B1, AP1M1, SNRPB, AP2M1, SNRPD1, AP1G1, AP1B1, HNRNPUL1, DDX21, CCT5, EEF1G, CFL1, RPS15A, AP2A2, CLU, PCBP2, FXR2, MRPS2, IFIT5, STAT1, C1QBP, AIMP1, AP2A1, DDX1, EIF2S1, PSMA2, EIF2AK2, ABCE1, TPT1, ADAR, DHX36, ILF3
positive regulation of protein localization to nucleus	0.00670332	GO:1900182	17	8.81233	124	IPO5, HSP90AB1, TRIM28, CCT3, HSP90AA1, CCT7, HNRNPM, CCT6A, CCT5, TCP1, CCT4, FLNA, CDK1, JUP, PARP1, CCT8, CCT2
phosphorylation	0.00678514	GO:0016310	184	155.353	2186	SPTBN1, LDHA, AK2, SPTBN2, EIF2A, NDUFC2, PSMD3, PPP2R1A, EZR, YWHAB, COASY, HSP90AB1, TRIM28, PSMB2, PRMT5, PTPN11, PSMD14, RPS6KA3, GSTP1, RBM4, PSMD11, PSMB5, AGK, PRPS1, CAB39, HSPH1, ENO1, PHB2, PSMA4, SPAG9, NPM1, TPI1, EEF1A2, NDUFA9, PFKL, PFKP, MRE11A, PAK2, RPS27A, CYC1, PSMA7, SKP1, CPNE3, HSP90AA1, PKM, PSMD8, CDK2, RAC1, UCHL1, SRPK1, CUL3, TWF1, PSMC3, ANXA2, IQGAP1, CMPK1, MAPK1, D…
regulation of actin polymerization or depolymerization	0.00686492	GO:0008064	20	11.0154	155	SPTBN1, SPTBN2, CAPZB, WDR1, ACTR3, RAC1, ACTR2, PFN1, TWF1, ARPC4, GMFB, ARPC1A, CORO1B, CAPZA2, DSTN, ARPC2, ADD1, SPTAN1, ARPC1B, ARPC3
actin polymerization or depolymerization	0.00688212	GO:0008154	22	12.5078	176	SPTBN1, SPTBN2, CAPZB, WDR1, ACTR3, RAC1, ACTR2, PFN1, TWF1, ARPC4, GMFB, ARPC1A, CORO1B, CAPZA2, DIAPH1, CFL1, DSTN, ARPC2, ADD1, SPTAN1, ARPC1B, ARPC3
cholesterol biosynthetic process	0.00695035	GO:0006695	9	3.48229	49	CYB5R3, HMGCS1, LBR, G6PD, ACLY, POR, NSDHL, FDPS, ACAA2
secondary alcohol biosynthetic process	0.00695035	GO:1902653	9	3.48229	49	CYB5R3, HMGCS1, LBR, G6PD, ACLY, POR, NSDHL, FDPS, ACAA2
glutamine family amino acid catabolic process	0.00697322	GO:0009065	6	1.77668	25	GLUD1, FAH, GLS, OAT, PPAT, GOT2
cellular response to epidermal growth factor stimulus	0.00697322	GO:0071364	6	1.77668	25	GSTP1, EEF1A1, IQGAP1, CAD, MCM7, PLCG1
glucose transport	0.00703864	GO:0015758	19	10.3047	145	EZR, SEH1L, PTPN11, AAAS, NUP153, NUP133, NUP93, NUP98, CLTCL1, NUP210, HK1, RAE1, RANBP2, NUP155, NUP205, NUP107, SLC2A1, NUP160, NUP85
RNA splicing, via endonucleolytic cleavage and ligation	0.00705227	GO:0000394	5	1.27921	18	RTCB, C14orf166, HSPA1A, FAM98B, DDX1
aspartate family amino acid catabolic process	0.00705227	GO:0009068	5	1.27921	18	DLD, GOT2, OGDH, GCDH, ALDH7A1
glycine metabolic process	0.00705227	GO:0006544	5	1.27921	18	DHFR, GART, SHMT1, SHMT2, PHGDH
double-strand break repair via nonhomologous end joining	0.00722149	GO:0006303	11	4.7615	67	PSMD14, HIST1H4A, MRE11A, DEK, PRKDC, RAD50, XRCC5, POLA1, XRCC6, PRPF19, RIF1
cell redox homeostasis	0.00722149	GO:0045454	11	4.7615	67	TXNL1, GLRX3, PDIA6, PDIA3, GSR, AIFM1, DLD, QSOX2, DNAJC10, NNT, APEX1
tRNA processing	0.00728305	GO:0008033	16	8.17273	115	SSB, TRMT6, POP1, AARS, RTCB, C14orf166, HSD17B10, NAT10, FAM98B, NSUN2, DDX1, IKBKAP, KARS, SARS, ELAC2, FBL
positive regulation of establishment of protein localization to mitochondrion	0.00728305	GO:1903749	16	8.17273	115	YWHAB, HUWE1, YWHAQ, U2AF1, PSMD8, U2AF2, CSNK2A2, YWHAE, RUVBL1, NMT1, YWHAG, DYNLL1, NPEPPS, ACTL6A, PSMB7, SAE1
regulation of actin filament length	0.00736442	GO:0030832	20	11.0865	156	SPTBN1, SPTBN2, CAPZB, WDR1, ACTR3, RAC1, ACTR2, PFN1, TWF1, ARPC4, GMFB, ARPC1A, CORO1B, CAPZA2, DSTN, ARPC2, ADD1, SPTAN1, ARPC1B, ARPC3
maintenance of protein location in cell	0.0074818	GO:0032507	13	6.11178	86	EZR, YWHAB, PDIA3, TWF1, G3BP2, HK1, FLNB, PSMD10, EPB41L3, DBN1, FLNA, JUP, TLN1
Golgi to plasma membrane protein transport	0.00748901	GO:0043001	7	2.34522	33	SPTBN1, RAB10, ACSL3, NSF, KRT18, RACK1, CSK
regulation of protein polymerization	0.00762924	GO:0032271	21	11.8682	167	SPTBN1, SPTBN2, CAPZB, MAPRE1, ACTR3, RAC1, ACTR2, PFN1, TWF1, ARPC4, GMFB, ARPC1A, CORO1B, CAPZA2, CLASP1, ARPC2, ADD1, SPTAN1, RPS3, ARPC1B, ARPC3
liver development	0.00773422	GO:0001889	18	9.66514	136	AK2, PRMT5, HNRNPD, SRSF5, HNRNPK, MPST, ASS1, PKM, CUL3, ANXA1, HMGCS1, ASNS, CAD, DDX39B, ACAT1, NCL, UROD, ALDH9A1
regulation of establishment of protein localization to mitochondrion	0.00785293	GO:1903747	17	8.95447	126	YWHAB, HUWE1, HSPH1, YWHAQ, U2AF1, PSMD8, U2AF2, CSNK2A2, YWHAE, RUVBL1, NMT1, YWHAG, DYNLL1, NPEPPS, ACTL6A, PSMB7, SAE1
establishment of cell polarity	0.00787617	GO:0030010	15	7.53312	106	EZR, RAB10, SCRIB, DOCK7, MAP4, MYH9, MSN, RAP1B, CLASP1, ARHGEF2, RACK1, MAP1B, FSCN1, NUMA1, PAFAH1B1
modification of morphology or physiology of other organism	0.00787617	GO:0035821	15	7.53312	106	TYMS, SMARCA4, ZC3HAV1, KPNB1, SLC25A6, KPNA3, CFL1, PPIB, VAPA, KPNA2, TARDBP, KPNA1, RAB9A, EIF2AK2, KPNA4
regulation of IRE1-mediated unfolded protein response	0.00790816	GO:1903894	4	0.852807	12	HSPA1A, TMEM33, BAX, PTPN1
lysine catabolic process	0.00790816	GO:0006554	4	0.852807	12	DLD, OGDH, GCDH, ALDH7A1
positive regulation of endoplasmic reticulum unfolded protein response	0.00790816	GO:1900103	4	0.852807	12	HSPA1A, TMEM33, BAX, PTPN1
sulfur compound biosynthetic process	0.00811649	GO:0044272	24	14.2134	200	PDHA1, HSD17B12, GSTP1, AGK, GSS, ACOT7, MAT2B, MPST, ACSL3, ACACA, FASN, SLC25A1, DLAT, ESD, ACOT9, ACSL4, DLD, AHCY, ACLY, MAT2A, AKR1A1, PDK3, PDHB, GCDH
monosaccharide transport	0.00813104	GO:0015749	19	10.4469	147	EZR, SEH1L, PTPN11, AAAS, NUP153, NUP133, NUP93, NUP98, CLTCL1, NUP210, HK1, RAE1, RANBP2, NUP155, NUP205, NUP107, SLC2A1, NUP160, NUP85
hexose transport	0.00813104	GO:0008645	19	10.4469	147	EZR, SEH1L, PTPN11, AAAS, NUP153, NUP133, NUP93, NUP98, CLTCL1, NUP210, HK1, RAE1, RANBP2, NUP155, NUP205, NUP107, SLC2A1, NUP160, NUP85
homeostatic process	0.00817556	GO:0042592	134	109.87	1546	DNAJA3, RPS14, ATP6V1B2, GNAS, TXNL1, PTPN11, GSTP1, ANXA6, HMGB2, SMARCA4, CCT3, RPS24, CCDC47, HIST1H4A, FH, ATP6V1A, HNRNPK, MRE11A, CLNS1A, SEC24A, GLRX3, PRCP, SLC16A1, PDIA6, CCT7, ABCB7, RAB7A, ACACA, GTF2I, RAC1, PDIA3, ATP6V1H, GNL3, GSR, HNRNPC, MAPK1, FEN1, UPF1, ANXA1, PCNA, GPI, CCT6A, UBAP2L, RFC5, AIFM1, AP3D1, OXCT1, HMGB1, HK1, ADNP, STOML2, USP7, ANXA7, DLD, FN1, G6PD, PICALM, D…
positive regulation of endopeptidase activity	0.00833054	GO:0010950	18	9.73621	137	PSMD14, DDX3X, PDCD6, ASPH, CYFIP2, NDUFA13, AIFM1, HMGB1, ANP32B, BAX, RPS27L, RACK1, HSPD1, CYCS, VCP, RPS3, FAM162A, PSME3
cellular response to nitrogen compound	0.0084413	GO:1901699	54	38.8027	546	IPO5, ATP6V1B2, EZR, PTPN11, HNRNPD, SRSF5, GSTP1, RAB10, GFPT1, DNM2, NPM1, ATP6V1A, ZC3HAV1, HNRNPK, ASS1, CDK2, ATP6V1H, MAPK1, CAPN2, CDC5L, AIFM1, YWHAG, DIAPH1, SRRT, RAP1B, PRKDC, PPAT, NCOA5, NAMPT, ATP6V1C1, MAPK3, ARHGEF2, PTPN1, POR, JUP, HDAC2, DNMT1, APRT, IDE, PARP1, SMARCC1, AKR1B1, ATP6AP1, GNB1, CTNNA1, APEX1, HNRNPA2B1, ADAR, MRPL44, HSP90B1, GNAI2, PRKAR2A, RANGAP1, CSK
regulation of mRNA catabolic process	0.00852956	GO:0061013	6	1.84775	26	CNOT1, ZC3HAV1, PNPT1, PABPC1, UPF1, HNRNPR
pyrimidine-containing compound biosynthetic process	0.00856605	GO:0072528	8	2.98482	42	TYMS, PRPS1, SHMT1, CTPS1, CMPK1, CAD, NME3, UMPS
cellular response to peptide hormone stimulus	0.00877562	GO:0071375	32	20.6095	290	ATP6V1B2, PTPN11, SRSF5, GSTP1, RAB10, GFPT1, ATP6V1A, HNRNPK, ASS1, CDK2, ATP6V1H, MAPK1, CDC5L, YWHAG, PRKDC, PPAT, NCOA5, NAMPT, ATP6V1C1, MAPK3, PTPN1, POR, APRT, IDE, PARP1, SMARCC1, ATP6AP1, GNB1, APEX1, PRKAR2A, RANGAP1, CSK
positive regulation of mitochondrial outer membrane permeabilization involved in apoptotic signaling pathway	0.0088646	GO:1901030	7	2.41629	34	YWHAB, YWHAQ, YWHAE, NMT1, YWHAG, DYNLL1, BAX
response to peptide	0.00897925	GO:1901652	44	30.4878	429	HADHA, ATP6V1B2, PTPN11, SRSF5, GSTP1, RAB10, GFPT1, ATP6V1A, HNRNPK, CYC1, BSG, ASS1, PKM, CDK2, ATP6V1H, MAPK1, CDC5L, ANXA1, EIF6, YWHAG, PRKDC, PPAT, NCOA5, NAMPT, ATP6V1C1, MAPK3, ATP2A2, STAT1, ARHGEF2, PTPN1, POR, APRT, LTA4H, IDE, PARP1, SMARCC1, AKR1B1, ATP6AP1, GNB1, GGH, APEX1, PRKAR2A, RANGAP1, CSK
inner mitochondrial membrane organization	0.00901955	GO:0007007	5	1.35028	19	NDUFA13, AFG3L2, BAX, LETM1, IMMT
nucleotide-sugar biosynthetic process	0.00901955	GO:0009226	5	1.35028	19	UGP2, GFPT1, UAP1, UGDH, PMM2
fatty acid beta-oxidation using acyl-CoA dehydrogenase	0.00901955	GO:0033539	5	1.35028	19	ETFB, ETFA, ACAD9, ACOX1, GCDH
negative regulation of cellular process	0.0090368	GO:0048523	330	295.284	4155	SPTBN1, RBMX, SPTBN2, XPO1, NDRG3, DNAJA3, RPL13A, PSMD3, DDX6, PPP2R1A, RPS14, SLIRP, EZR, YWHAB, HSP90AB1, TRIM28, PSMB2, PRMT5, CAPZB, PTPN11, G3BP1, SRSF2, USP9X, HNRNPD, ATP5A1, SRSF7, PSMD14, RPS6KA3, GSTP1, MSH6, RBM4, AARS, PSMD11, CNOT9, TRIM25, CNOT1, DDX3X, HMGB2, PSMB5, VAT1, PSPC1, SMARCA4, CAB39, MTDH, HSPH1, ENO1, GFPT1, PHB2, PSMA4, DNM2, BUB3, SUPT5H, MAPRE1, PDS5A, RPS3A, SCRIB,…
negative regulation of response to DNA damage stimulus	0.00907083	GO:2001021	9	3.62443	51	OTUB1, USP47, PSMD10, CLU, DDX39B, TRIP12, CCAR2, RPS3, TPT1
regulation of cofactor metabolic process	0.00907083	GO:0051193	9	3.62443	51	PDHA1, DLAT, PRKAG1, DLD, EIF6, TIGAR, PDK3, PDHB, ME2
regulation of coenzyme metabolic process	0.00907083	GO:0051196	9	3.62443	51	PDHA1, DLAT, PRKAG1, DLD, EIF6, TIGAR, PDK3, PDHB, ME2
DNA damage response, signal transduction by p53 class mediator resulting in cell cycle arrest	0.00917228	GO:0006977	10	4.26403	60	CNOT9, CNOT1, NPM1, RPS27A, CDK2, PCNA, BAX, CDK1, CARM1, PRMT1
regulation of phosphoprotein phosphatase activity	0.00917228	GO:0043666	10	4.26403	60	PPP2R1A, PTPA, PPP2R5C, TIPRL, PPP6R3, PPME1, PPP2R2A, PPP2R5D, EIF2AK2, HSP90B1
myeloid cell homeostasis	0.00928425	GO:0002262	16	8.38593	118	RPS14, HMGB2, RPS24, ANXA1, GPI, HMGB1, G6PD, MTHFD1, BAX, RPS19, ADD1, RPS6, RPS17, ADAR, SFXN1, PRMT1
positive regulation of biological process	0.00947912	GO:0048518	395	358.534	5045	SPTBN1, LDHA, RBMX, ANXA3, IPO5, EIF2A, RNASEH2B, DNAJA3, UBE2M, PSMD3, PPP2R1A, CAPN1, HSD17B12, GNAS, EZR, FUBP3, YWHAB, HSP90AB1, SEH1L, GLUD1, TRIM28, PSMB2, ARHGAP1, PRMT5, PTPN11, CFAP20, KIF5B, HNRNPD, CAPNS1, PSMD14, RPS6KA3, GSTP1, MSH6, RBM4, PSMD11, CNOT9, TRIM25, CNOT1, HUWE1, DDX3X, HMGB2, PSMB5, DPYSL2, SMARCA4, CAB39, MTDH, SAFB, HSPH1, PHB2, PSMA4, DNM2, CCT3, SPAG9, BUB3, SUPT5H,…
negative regulation of cell death	0.00955942	GO:0060548	80	61.6863	868	DNAJA3, HSP90AB1, RPS6KA3, GSTP1, AARS, DDX3X, HMGB2, MTDH, HSPH1, PHB2, RPS3A, NPM1, SRSF6, CIAPIN1, HNRNPK, MRE11A, PAK2, RPS27A, HYOU1, MAD2L1, PA2G4, DAD1, ATAD3A, USP47, ANXA1, NDUFA13, GPI, YWHAE, ADNP, ASNS, DHRS2, LMNA, FN1, FAM129B, MSH2, PRKDC, HSPA1A, CFL1, PSMD10, PDCD4, SLC25A5, KRT18, ILK, CSNK2A1, CLU, BAG6, BAX, PSMC5, PPP5C, NAA15, ARHGEF2, RACK1, FKBP8, RPS6, PTPN1, HSPD1, TIGAR…
cellular amino acid catabolic process	0.009589	GO:0009063	12	5.61431	79	FAH, SHMT1, GLS, OAT, DLD, PPAT, DTD1, GOT2, MCCC2, OGDH, GCDH, ALDH7A1
hepaticobiliary system development	0.0096339	GO:0061008	18	9.87834	139	AK2, PRMT5, HNRNPD, SRSF5, HNRNPK, MPST, ASS1, PKM, CUL3, ANXA1, HMGCS1, ASNS, CAD, DDX39B, ACAT1, NCL, UROD, ALDH9A1
regulation of actin filament polymerization	0.0096339	GO:0030833	18	9.87834	139	SPTBN1, SPTBN2, CAPZB, ACTR3, RAC1, ACTR2, PFN1, TWF1, ARPC4, GMFB, ARPC1A, CORO1B, CAPZA2, ARPC2, ADD1, SPTAN1, ARPC1B, ARPC3
epithelium development	0.00974137	GO:0060429	94	74.1942	1044	KRT2, TYMS, PSMD3, GNAS, EZR, TRIM28, PSMB2, CNN3, PSMD14, AARS, PSMD11, PSMB5, RAB10, PHB2, PSMA4, SCRIB, NUP133, SRSF6, CLTC, KRT17, RPS27A, PSMA7, PSMD8, RAB1B, RAC1, PPP1CA, VIM, PFN1, PSMC3, IQGAP1, MAPK1, AIMP2, AP2B1, ANXA1, PCNA, PSMB4, AP2M1, FLNB, SEC24B, ANXA7, MSN, RBM15, HSD17B4, RAP1B, PSMD7, PRKDC, PSMD10, CLASP1, PSMF1, ILK, AP2A2, PHGDH, PGK1, MTHFD1, PSMD13, BAX, PSMC5, PSMD1, R…
regulation of catalytic activity	0.00982883	GO:0050790	191	163.384	2299	SPTBN1, ANXA3, SPTBN2, GAPVD1, IPO5, DNAJA3, PSMD3, PPP2R1A, IPO7, YWHAB, HSP90AB1, PSMB2, ARHGAP1, PTPN11, CNN3, PSMD14, RPS6KA3, GSTP1, MSH6, PSMD11, DDX3X, HMGB2, PSMB5, CAB39, HSPH1, PSMA4, DNM2, SPAG9, BUB3, SCRIB, UBA2, NPM1, DHFR, EEF1A2, MAT2B, MRE11A, PAK2, RPS27A, RNH1, PSMA7, SKP1, TBC1D15, SEPT2, PDCD6, HSP90AA1, PGAM5, PSMD8, MAD2L1, CDK2, ARL1, RAC1, ATP6V1H, UCHL1, CAND1, ASPH, PFN…
regulation of substrate adhesion-dependent cell spreading	0.00988405	GO:1900024	8	3.05589	43	DNM2, ACTN4, RAC1, CORO1C, RCC2, C1QBP, ARPC2, FLNA
