# Supplementary material for: Cell-based HTS identifies a chemical chaperone for preventing ER protein aggregation and proteotoxicity
Source: eLife journal article supplement (doi:10.7554/elife.43302), 2019-12-16
Supplement: supp [file elife-43302-supp-v1.zip › elife_poa_e43302_Figure_6_source_data_1.xlsx]

## Sheet: Figure 6D&E
# Peptides	# PSMs	Gene Symbol	probe-/+	competitor +/-	probe +/-	log2 competitor	log2 probe	Tag
1	1	SMG1	0.056	7.369	17.8571	2.88147	4.15843	Non-Specific
1	1		0.497	1.789	2.01207	0.839153	1.00868	Non-Specific
2	2	ARL2	0.01	9.409	100	3.23404	6.64386	Non-Specific
1	3	AAMP	0.01	3.843	100	1.94223	6.64386	Non-Specific
2	2	CALD1	0.02	9.64	50	3.26903	5.64386	Non-Specific
1	7	PPT1	0.055	0.645	18.1818	-0.632629	4.18442	Non-Specific
2	12	RPL14	0.01	18.822	100	4.23435	6.64386	Competed and Selective
1	4	SYNGR2	0.024	1.17	41.6667	0.226509	5.38082	Non-Specific
1	1	PRRC2C	0.033	3.946	30.303	1.98039	4.92139	Non-Specific
1	1	FAT2	1.212	0.461	0.825083	-1.11716	-0.27739	Non-Specific
1	2	CORO1A	0.01	6.84	100	2.774	6.64386	Non-Specific
2	4	TACC3	0.072	0.377	13.8889	-1.40736	3.79586	Non-Specific
1	1	RAB3GAP2	0.019	4.079	52.6316	2.02822	5.71786	Non-Specific
1	4	LSM12; LSM12P1	0.011	2.95	90.9091	1.56071	6.50635	Non-Specific
1	1	NT5DC2	0.03	3.833	33.3333	1.93847	5.05889	Non-Specific
3	3	NIPBL	0.102	0.958	9.80392	-0.0619024	3.29336	Non-Specific
1	2	PIR	0.031	2.438	32.2581	1.2857	5.01159	Non-Specific
1	8	ERH	0.018	2.801	55.5556	1.48594	5.79586	Non-Specific
1	6	NUBP1	0.01	1.69	100	0.757023	6.64386	Non-Specific
1	2	ANKFY1	0.015	14.629	66.6667	3.87076	6.05889	Non-Specific
1	1	HERC2	0.131	65.201	7.63359	6.02682	2.93236	Non-Specific
1	1	MED12	0.104	9.95	9.61538	3.3147	3.26534	Non-Specific
1	2	TIMM17A	0.075	2.53	13.3333	1.33914	3.73697	Non-Specific
1	1	HBS1L	0.051	1.466	19.6078	0.551885	4.29336	Non-Specific
4	46	RPL8	0.01	8.288	100	3.05102	6.64386	Competed and Selective
3	5	RPA2	0.069	1.023	14.4928	0.0328061	3.85726	Selective
1	2	PKN2	0.024	27.355	41.6667	4.77373	5.38082	Non-Specific
1	1	CD9	0.016	2.457	62.5	1.2969	5.96578	Non-Specific
1	2	NCAPD3	0.028	5.599	35.7143	2.48517	5.15843	Non-Specific
2	10	NDUFC2; NDUFC2-KCTD14	0.01	6.509	100	2.70244	6.64386	Competed and Selective
1	3	SNX18	0.054	3.933	18.5185	1.97563	4.2109	Non-Specific
4	44	HIST1H1C	0.01	5.423	100	2.43909	6.64386	Competed and Selective
1	21	MGST2	0.01	3.155	100	1.65764	6.64386	Non-Specific
2	4	TRMT112	0.045	1.841	22.2222	0.88049	4.47393	Non-Specific
2	3	CTSC	0.038	2.516	26.3158	1.33113	4.71786	Non-Specific
1	4	TSNAX	0.06	1.845	16.6667	0.883621	4.05889	Non-Specific
1	2	CNOT10	0.031	14.201	32.2581	3.82792	5.01159	Non-Specific
3	14	RPS23	0.01	5.026	100	2.32941	6.64386	Competed and Selective
3	71	RPL12	0.01	4.605	100	2.2032	6.64386	Competed and Selective
1	2	PRPF38B	0.05	3.774	20	1.91609	4.32193	Non-Specific
3	13	RPS28	0.401	1.115	2.49377	0.157044	1.31833	Selective
7	92	GDI1	0.03	1.487	33.3333	0.572405	5.05889	Selective
1	8	SLC30A1	0.352	0.686	2.84091	-0.54372	1.50635	Non-Specific
2	6	TES	0.01	3.369	100	1.75232	6.64386	Competed and Selective
19	1029	TUBA1C	0.01	2.96	100	1.5656	6.64386	Competed and Selective
1	4	HMGA1	0.01	35.475	100	5.14873	6.64386	Non-Specific
1	3	VASN	0.141	2.961	7.0922	1.56608	2.82623	Non-Specific
1	2	NMD3	0.014	22.413	71.4286	4.48626	6.15843	Non-Specific
3	4	SUPT6H	0.023	11.521	43.4783	3.52619	5.44222	Non-Specific
3	7	PPP3CA	0.028	1.295	35.7143	0.372952	5.15843	Selective
1	1	GAK	0.083	6.443	12.0482	2.68773	3.59074	Non-Specific
1	3	CD97; ADGRE5	0.097	3.107	10.3093	1.63552	3.36587	Non-Specific
1	3	BTAF1	0.037	3.83	27.027	1.93734	4.75633	Non-Specific
1	1	MAP2K2	0.045	5.638	22.2222	2.49518	4.47393	Non-Specific
1	4	PUM1	0.053	2.868	18.8679	1.52005	4.23786	Non-Specific
2	10	ASPH	0.01	2.893	100	1.53257	6.64386	Competed and Selective
1	9	NDUFB11	0.155	0.721	6.45161	-0.471929	2.68966	Non-Specific
2	4	TIAL1	0.029	7.958	34.4828	2.99241	5.1078	Non-Specific
2	3	TSG101	0.203	0.665	4.92611	-0.588574	2.30045	Non-Specific
1	1	SEL1L	0.07	1.86	14.2857	0.895303	3.8365	Non-Specific
6	22	THOP1	0.044	1.452	22.7273	0.538041	4.50635	Selective
1	1	DHCR7	0.02	1.789	50	0.839153	5.64386	Non-Specific
1	17	SEC61G	0.014	2.28	71.4286	1.18903	6.15843	Non-Specific
1	12	DBNL	0.054	1.491	18.5185	0.57628	4.2109	Non-Specific
1	3	ICMT	0.034	4.605	29.4118	2.2032	4.87832	Non-Specific
2	8	PPP2CB	0.01	2.8	100	1.48543	6.64386	Competed and Selective
1	2	RCL1	0.024	16.293	41.6667	4.02618	5.38082	Non-Specific
1	1	LIN7A	0.192	0.512	5.20833	-0.965784	2.38082	Non-Specific
11	182	CLTCL1	0.01	2.204	100	1.14012	6.64386	Competed and Selective
1	1	GPHN	0.148	3.237	6.75676	1.69466	2.75633	Non-Specific
1	1	COA3	0.034	4.127	29.4118	2.04509	4.87832	Non-Specific
7	103	RPL17	0.011	8.826	90.9091	3.14176	6.50635	Competed and Selective
1	2	DDX47	0.022	78.011	45.4545	6.28561	5.50635	Non-Specific
1	5	ATP8A2	0.058	1.597	17.2414	0.675364	4.1078	Non-Specific
14	234	KRT6A	2.036	2.153	0.491159	1.10635	-1.02574	Competed
1	2	UBE2B	3.188	0.272	0.313676	-1.87832	-1.67265	Non-Specific
6	43	ATP5F1	0.011	3.163	90.9091	1.66129	6.50635	Competed and Selective
1	1	SMG8	0.208	8.533	4.80769	3.09305	2.26534	Non-Specific
2	2	ARFGAP2	0.084	15.567	11.9048	3.96042	3.57347	Non-Specific
1	4	TTC1	0.104	0.902	9.61538	-0.148801	3.26534	Non-Specific
8	115	RPS16	0.012	6.176	83.3333	2.62667	6.38082	Competed and Selective
1	2	FAS	0.053	1.559	18.8679	0.640621	4.23786	Non-Specific
1	4	PBK	0.01	2.651	100	1.40654	6.64386	Non-Specific
2	18	ARPC1A	0.012	4.5	83.3333	2.16993	6.38082	Competed and Selective
2	4	EMC3	0.108	2.319	9.25926	1.2135	3.2109	Non-Specific
1	2	DIAPH3	0.029	12.426	34.4828	3.63529	5.1078	Non-Specific
3	29	GNAI3	0.012	1.726	83.3333	0.787432	6.38082	Competed and Selective
2	6	PDXK	0.016	1.28	62.5	0.356144	5.96578	Selective
2	2	FTSJ3	0.013	12.202	76.9231	3.60905	6.26534	Non-Specific
2	12	SPTLC1	0.013	3.228	76.9231	1.69064	6.26534	Competed and Selective
2	2	ACTR10	0.12	5.813	8.33333	2.53928	3.05889	Non-Specific
1	1	NUDT16L1	0.07	5.209	14.2857	2.38101	3.8365	Non-Specific
78	520	MYH9	0.014	34.968	71.4286	5.12796	6.15843	Competed and Selective
2	2	CSTF2T	0.163	1.57	6.13497	0.650765	2.61706	Non-Specific
4	4	RNF40	0.041	10.875	24.3902	3.44294	4.60823	Non-Specific
2	4	SNRPB2	0.057	1.845	17.5439	0.883621	4.13289	Non-Specific
2	25	SLC39A14	0.014	1.719	71.4286	0.78157	6.15843	Competed and Selective
1	2	QTRTD1; QTRT2	0.045	6.866	22.2222	2.77947	4.47393	Non-Specific
4	13	ENAH	0.016	9.838	62.5	3.29837	5.96578	Competed and Selective
3	8	SLC25A1	0.016	3.356	62.5	1.74674	5.96578	Competed and Selective
1	1	USP48	0.067	7.112	14.9254	2.83026	3.8997	Non-Specific
4	38	PPP1CB	0.017	21.826	58.8235	4.44798	5.87832	Competed and Selective
11	545	EEF1A2	0.017	9.39	58.8235	3.23113	5.87832	Competed and Selective
1	5	PRKAR1A	0.038	2.218	26.3158	1.14926	4.71786	Non-Specific
1	1	KDELC1	0.169	1.503	5.91716	0.587845	2.5649	Non-Specific
1	3	GSTK1	0.049	9.347	20.4082	3.2245	4.35107	Non-Specific
2	2	NXF1	0.284	0.805	3.52113	-0.312939	1.81604	Non-Specific
7	140	RPL13A	0.017	4.784	58.8235	2.25822	5.87832	Competed and Selective
2	36	COPS3	0.018	2.172	55.5556	1.11902	5.79586	Competed and Selective
4	6	PGAM5	0.019	13.926	52.6316	3.79971	5.71786	Competed and Selective
2	5	NUP85	0.019	10.864	52.6316	3.44148	5.71786	Competed and Selective
2	4	DNAJC2	0.054	7.959	18.5185	2.99259	4.2109	Non-Specific
6	38	CORO1C	0.019	10.792	52.6316	3.43189	5.71786	Competed and Selective
10	49	CTPS1	0.019	3.751	52.6316	1.90728	5.71786	Competed and Selective
19	178	DDX5	0.02	6.461	50	2.69176	5.64386	Competed and Selective
1	1	HIBCH	0.043	6.816	23.2558	2.76893	4.53952	Non-Specific
1	3	DDX41	0.051	9.407	19.6078	3.23373	4.29336	Non-Specific
1	1	SERPINB12	3.088	0.119	0.323834	-3.07097	-1.62667	Non-Specific
2	2	NOB1	0.084	5.839	11.9048	2.54572	3.57347	Non-Specific
1	2	CCDC8	0.08	12.468	12.5	3.64016	3.64386	Non-Specific
1	1	POP4	0.105	8.482	9.52381	3.0844	3.25154	Non-Specific
6	22	PMPCB	0.02	5.112	50	2.35389	5.64386	Competed and Selective
1	3	ZC3H14	0.082	3.344	12.1951	1.74157	3.60823	Non-Specific
1	1	MRPL2	0.036	3.184	27.7778	1.67084	4.79586	Non-Specific
1	1	PPP4C	0.471	1.32	2.12314	0.400538	1.0862	Non-Specific
1	6	RALA	0.04	3.39	25	1.76129	4.64386	Non-Specific
1	1	RRAGD	0.148	1.968	6.75676	0.97673	2.75633	Non-Specific
1	7	MRPL23	0.162	1.834	6.17284	0.874994	2.62593	Non-Specific
1	1	GJC2	0.067	6.968	14.9254	2.80074	3.8997	Non-Specific
3	33	RIC8A	0.02	5.08	50	2.34483	5.64386	Competed and Selective
2	40	RPS27L	0.02	5.075	50	2.34341	5.64386	Competed and Selective
1	1	CD47	3.418	0.02	0.292569	-5.64386	-1.77315	Non-Specific
2	9	ANP32A	0.029	1.354	34.4828	0.437228	5.1078	Selective
3	11	DDX19B	0.02	2.423	50	1.27679	5.64386	Competed and Selective
1	1	PDXP	0.127	12.228	7.87402	3.61212	2.9771	Non-Specific
1	1	ASUN; INTS13	0.087	2.291	11.4943	1.19598	3.52284	Non-Specific
1	2	SCARB1	0.025	1.948	40	0.961994	5.32193	Non-Specific
1	7	NOC2L	0.045	4.587	22.2222	2.19755	4.47393	Non-Specific
1	2	HRNR	0.799	1.788	1.25156	0.838347	0.323733	Non-Specific
2	3	CPSF3	0.046	2.618	21.7391	1.38847	4.44222	Non-Specific
3	31	RNH1	0.02	2.071	50	1.05033	5.64386	Competed and Selective
1	2	C19orf43; TRIR	0.264	4.307	3.78788	2.10668	1.92139	Non-Specific
1	2	COG3	0.061	4.403	16.3934	2.13849	4.03505	Non-Specific
1	1	UFD1L; UFD1	0.025	1.751	40	0.808179	5.32193	Non-Specific
1	1	CTSA	0.077	1.116	12.987	0.158337	3.699	Non-Specific
2	11	UQCR10	0.02	1.626	50	0.701327	5.64386	Competed and Selective
21	82	IARS	0.021	32.174	47.619	5.00782	5.57347	Competed and Selective
1	2	ZW10	0.037	5.16	27.027	2.36737	4.75633	Non-Specific
24	130	SND1	0.021	8.222	47.619	3.03949	5.57347	Competed and Selective
29	105	PARP1	0.021	16.204	47.619	4.01828	5.57347	Competed and Selective
16	62	DARS	0.021	17.938	47.619	4.16495	5.57347	Competed and Selective
1	10	CTSZ	0.035	1.119	28.5714	0.16221	4.8365	Non-Specific
2	44	RPL34	0.021	3.201	47.619	1.67852	5.57347	Competed and Selective
3	8	DAZAP1	0.323	0.432	3.09598	-1.2109	1.63039	Selective
17	98	DHX15	0.022	16.825	45.4545	4.07253	5.50635	Competed and Selective
2	4	BRD3	0.059	8.036	16.9492	3.00648	4.08314	Non-Specific
1	20	RPL29	0.01	5.384	100	2.42868	6.64386	Non-Specific
20	132	ALDH18A1	0.022	5.578	45.4545	2.47975	5.50635	Competed and Selective
2	4	SAAL1	0.057	1.272	17.5439	0.347099	4.13289	Non-Specific
1	3	RAB11FIP1	0.067	5.259	14.9254	2.39479	3.8997	Non-Specific
3	36	USMG5	0.022	2.908	45.4545	1.54003	5.50635	Competed and Selective
3	25	C11orf58	0.39	0.509	2.5641	-0.974262	1.35845	Selective
4	18	ALYREF	0.023	35.739	43.4783	5.15943	5.44222	Competed and Selective
1	2	PRKAA1	0.026	13.767	38.4615	3.78314	5.26534	Non-Specific
1	1	GBE1	0.065	6.307	15.3846	2.65695	3.94342	Non-Specific
1	8	GOLGA8G; GOLGA8F	0.075	0.365	13.3333	-1.45403	3.73697	Non-Specific
8	19	RECQL	0.023	18.023	43.4783	4.17177	5.44222	Competed and Selective
3	39	SHMT1	0.023	11.552	43.4783	3.53007	5.44222	Competed and Selective
2	3	CWF19L1	0.099	3.505	10.101	1.80941	3.33643	Non-Specific
1	2	HMGB3	0.018	22.039	55.5556	4.46199	5.79586	Non-Specific
3	16	MAVS	0.147	0.318	6.80272	-1.6529	2.76611	Selective
32	266	DHX9	0.023	11.726	43.4783	3.55164	5.44222	Competed and Selective
84	306	PRKDC	0.023	16.091	43.4783	4.00818	5.44222	Competed and Selective
1	1	NDUFB8	0.152	3.583	6.57895	1.84117	2.71786	Non-Specific
1	1	UBL5	0.085	5.467	11.7647	2.45075	3.55639	Non-Specific
1	5	CAV1	0.037	1.778	27.027	0.830255	4.75633	Non-Specific
4	10	BLVRA	0.023	3.793	43.4783	1.92334	5.44222	Competed and Selective
14	202	KRT5	0.758	2.081	1.31926	1.05728	0.39973	Competed
1	3	PPIL2	0.204	9.062	4.90196	3.17983	2.29336	Non-Specific
2	7	CARM1	0.023	2.899	43.4783	1.53556	5.44222	Competed and Selective
1	3	GSK3A	0.018	25.431	55.5556	4.66852	5.79586	Non-Specific
5	22	TM9SF3	0.023	2.344	43.4783	1.22897	5.44222	Competed and Selective
2	6	CPOX	0.023	1.747	43.4783	0.80488	5.44222	Competed and Selective
2	2	LCMT1	0.059	4.441	16.9492	2.15088	4.08314	Non-Specific
23	80	COPA	0.024	13.808	41.6667	3.78743	5.38082	Competed and Selective
16	83	NSUN2	0.024	8.717	41.6667	3.12383	5.38082	Competed and Selective
1	2	CXorf56	0.024	30.15	41.6667	4.91409	5.38082	Non-Specific
2	8	GGCT	0.044	1.468	22.7273	0.553852	4.50635	Selective
2	3	OAS3	0.071	14.688	14.0845	3.87657	3.81604	Non-Specific
16	49	NAA15	0.024	6.529	41.6667	2.70686	5.38082	Competed and Selective
11	56	VPS35	0.024	6.235	41.6667	2.64039	5.38082	Competed and Selective
2	5	WDR18	0.025	11.322	40	3.50106	5.32193	Competed and Selective
14	49	RARS	0.025	10.266	40	3.3598	5.32193	Competed and Selective
3	4	STX5	0.2	2.64	5	1.40054	2.32193	Non-Specific
1	4	AP2S1	0.018	4.633	55.5556	2.21195	5.79586	Non-Specific
1	16	TMCO1	0.04	4.093	25	2.03316	4.64386	Non-Specific
2	42	HM13	0.018	1.166	55.5556	0.221568	5.79586	Selective
1	1	AKAP8L	0.114	2.371	8.77193	1.2455	3.13289	Non-Specific
5	51	KRT19	0.278	0.344	3.59712	-1.53952	1.84684	Selective
1	2	TMEM167A	0.019	2.252	52.6316	1.17121	5.71786	Non-Specific
18	96	COPB2	0.025	7.15	40	2.83794	5.32193	Competed and Selective
3	9	EHD4	0.025	6.689	40	2.74179	5.32193	Competed and Selective
11	28	NUP93	0.025	6.187	40	2.62924	5.32193	Competed and Selective
1	1	PDDC1; GATD1	0.371	2.24	2.69542	1.1635	1.43051	Non-Specific
3	4	ANXA4	0.237	3.842	4.21941	1.94186	2.07704	Non-Specific
25	143	EIF4G1	0.025	5.836	40	2.54498	5.32193	Competed and Selective
7	34	APEX1	0.025	4.662	40	2.22095	5.32193	Competed and Selective
3	6	AAAS	0.025	3.109	40	1.63645	5.32193	Competed and Selective
1	2	PSMD4	0.08	1.411	12.5	0.496718	3.64386	Non-Specific
1	3	MGMT	0.289	0.709	3.46021	-0.496142	1.79086	Non-Specific
2	4	PPID	0.051	1.538	19.6078	0.621056	4.29336	Non-Specific
1	1	PRX	0.418	0.201	2.39234	-2.31473	1.25843	Non-Specific
2	4	TMTC3	0.065	8.964	15.3846	3.16414	3.94342	Non-Specific
17	57	HK1	0.026	11.85	38.4615	3.56682	5.26534	Competed and Selective
1	1	ZFP91	0.118	4.053	8.47458	2.01899	3.08314	Non-Specific
9	26	QARS	0.026	11.125	38.4615	3.47573	5.26534	Competed and Selective
3	3	ROCK2	0.1	9.186	10	3.19944	3.32193	Non-Specific
3	7	PRKCSH	0.212	0.413	4.71698	-1.27579	2.23786	Selective
16	91	NARS	0.026	8.687	38.4615	3.11886	5.26534	Competed and Selective
3	78	RPL10	0.026	7.473	38.4615	2.90169	5.26534	Competed and Selective
6	23	FARSB	0.026	5.429	38.4615	2.44069	5.26534	Competed and Selective
14	202	RPL7	0.026	5.623	38.4615	2.49134	5.26534	Competed and Selective
2	3	SLTM	0.045	4.469	22.2222	2.15995	4.47393	Non-Specific
1	1	LPP	0.464	0.829	2.15517	-0.270556	1.1078	Non-Specific
2	3	NUP62	0.052	1.346	19.2308	0.428678	4.26534	Non-Specific
2	5	GGH	0.026	3.524	38.4615	1.81721	5.26534	Competed and Selective
1	5	ATP1B1	0.119	0.473	8.40336	-1.08009	3.07097	Non-Specific
4	31	CAPN2	0.026	2.73	38.4615	1.4489	5.26534	Competed and Selective
5	45	EMD	0.026	2.714	38.4615	1.44042	5.26534	Competed and Selective
2	3	EIF2B4	0.187	1.647	5.34759	0.719841	2.41889	Non-Specific
6	13	EIF2AK2	0.027	16.677	37.037	4.05979	5.2109	Competed and Selective
1	2	MAZ	0.168	4.419	5.95238	2.14372	2.57347	Non-Specific
2	4	ATP6V0A1	0.123	2.731	8.13008	1.44943	3.02327	Non-Specific
3	14	CARHSP1	0.058	1.432	17.2414	0.518031	4.1078	Selective
4	23	RPS5	0.027	16.091	37.037	4.00818	5.2109	Competed and Selective
1	3	SARNP	0.065	2.657	15.3846	1.4098	3.94342	Non-Specific
19	83	SRRM2	0.027	9.505	37.037	3.24869	5.2109	Competed and Selective
20	164	DDX21	0.027	9.728	37.037	3.28214	5.2109	Competed and Selective
34	134	EPRS	0.027	29.499	37.037	4.88259	5.2109	Competed and Selective
2	10	NDUFA6	1.058	1.518	0.94518	0.602172	-0.0813396	Competed
3	3	CRNKL1	0.067	12.365	14.9254	3.62819	3.8997	Non-Specific
22	121	MCM7	0.027	8.184	37.037	3.03281	5.2109	Competed and Selective
4	15	NUP214	0.062	1.427	16.129	0.512985	4.01159	Selective
1	33	RPL28	0.057	5.041	17.5439	2.33371	4.13289	Non-Specific
2	2	MTHFD1L	0.075	6.463	13.3333	2.6922	3.73697	Non-Specific
1	2	DNAJB12	0.089	4.029	11.236	2.01042	3.49005	Non-Specific
1	4	LPCAT1	0.082	3.935	12.1951	1.97636	3.60823	Non-Specific
3	20	ATP5L	0.027	2.259	37.037	1.17568	5.2109	Competed and Selective
1	21	S100A10	0.11	2.141	9.09091	1.09828	3.18442	Non-Specific
1	3	TRAPPC3	0.153	1.116	6.53595	0.158337	2.7084	Non-Specific
1	14	KCTD5	0.167	1.833	5.98802	0.874207	2.58208	Non-Specific
1	2	ARPC5	0.097	1.409	10.3093	0.494672	3.36587	Non-Specific
4	34	TRIP6	0.06	1.489	16.6667	0.574344	4.05889	Selective
2	2	UTP20	0.138	27.4	7.24638	4.7761	2.85726	Non-Specific
3	7	MRPL37	0.027	1.588	37.037	0.667211	5.2109	Competed and Selective
4	13	AKR1B1	0.027	1.52	37.037	0.604071	5.2109	Competed and Selective
1	6	EXOSC9	0.022	4.142	45.4545	2.05033	5.50635	Non-Specific
1	15	FHL1	0.055	2.02	18.1818	1.01436	4.18442	Non-Specific
1	17	IKBIP	0.046	1.087	21.7391	0.120352	4.44222	Non-Specific
1	1	GPX1	0.254	0.792	3.93701	-0.336428	1.9771	Non-Specific
4	15	CUL3	0.028	14.43	35.7143	3.851	5.15843	Competed and Selective
1	1	XRN1	0.058	6.259	17.2414	2.64593	4.1078	Non-Specific
1	3	DHX38	0.108	11.743	9.25926	3.55373	3.2109	Non-Specific
1	1	DHRS4	0.127	4.404	7.87402	2.13881	2.9771	Non-Specific
15	64	MCM5	0.028	9.253	35.7143	3.20992	5.15843	Competed and Selective
4	34	EIF3D	0.028	7.672	35.7143	2.9396	5.15843	Competed and Selective
8	47	ACSL3	0.028	7.161	35.7143	2.84016	5.15843	Competed and Selective
14	118	EIF3CL	0.028	6.73	35.7143	2.75061	5.15843	Competed and Selective
1	1	RNASEH1	0.176	4.819	5.68182	2.26873	2.50635	Non-Specific
4	11	SNRPA	0.111	1.172	9.00901	0.228973	3.17137	Selective
4	23	NUDC	0.155	1.126	6.45161	0.171207	2.68966	Selective
1	3	ANAPC7	0.057	4.753	17.5439	2.24884	4.13289	Non-Specific
6	7	SNX1	1.892	0.436	0.528541	-1.1976	-0.919912	Non-Specific
6	58	RPL18	0.028	6.281	35.7143	2.65099	5.15843	Competed and Selective
1	1	FLG2	0.615	2.374	1.62602	1.24732	0.701342	Non-Specific
7	42	G6PD	0.028	4.559	35.7143	2.18872	5.15843	Competed and Selective
1	2	TSEN34	0.174	2.457	5.74713	1.2969	2.52284	Non-Specific
5	82	HNRNPH2	0.028	3.25	35.7143	1.70044	5.15843	Competed and Selective
8	47	ELAVL1	0.028	3.181	35.7143	1.66948	5.15843	Competed and Selective
2	6	LAMP2	0.028	2.007	35.7143	1.00504	5.15843	Competed and Selective
5	36	DBN1	0.028	1.874	35.7143	0.906121	5.15843	Competed and Selective
13	39	MARS	0.029	11.868	34.4828	3.569	5.1078	Competed and Selective
1	7	SCAMP2	0.014	1.386	71.4286	0.470927	6.15843	Non-Specific
6	67	IGF2BP2	0.029	7.514	34.4828	2.90958	5.1078	Competed and Selective
2	3	CREBBP	0.049	4.402	20.4082	2.13816	4.35107	Non-Specific
22	53	EIF4G2	0.029	7.446	34.4828	2.89647	5.1078	Competed and Selective
1	7	EIF4E2	0.091	2.357	10.989	1.23695	3.45799	Non-Specific
6	8	DNAJC10	0.029	6.812	34.4828	2.76808	5.1078	Competed and Selective
1	1	NDUFS7	0.045	12.237	22.2222	3.61318	4.47393	Non-Specific
2	2	NCAPG2	0.068	3.923	14.7059	1.97196	3.87832	Non-Specific
1	1	DDX52	0.146	3.972	6.84932	1.98987	2.77596	Non-Specific
4	8	KPNA1	0.029	5.664	34.4828	2.50182	5.1078	Competed and Selective
8	73	CPNE3	0.029	4.559	34.4828	2.18872	5.1078	Competed and Selective
10	52	GART	0.029	3.697	34.4828	1.88636	5.1078	Competed and Selective
2	33	CDKN2A	0.317	1.4	3.15457	0.485427	1.65745	Selective
3	60	SNRPB	0.029	2.369	34.4828	1.24428	5.1078	Competed and Selective
2	21	TBC1D15	0.029	2.019	34.4828	1.01364	5.1078	Competed and Selective
1	6	GOSR1	0.284	2.001	3.52113	1.00072	1.81604	Non-Specific
32	93	SNRNP200	0.03	26.836	33.3333	4.7461	5.05889	Competed and Selective
2	16	RAB21	0.039	1.399	25.641	0.484396	4.68038	Selective
8	379	NME2; NME1-NME2	0.249	1.41	4.01606	0.495695	2.00578	Selective
2	3	TMEM189; TMEM189-UBE2V1	0.065	1.492	15.3846	0.577248	3.94342	Non-Specific
2	3	PIGS	0.197	1.81	5.07614	0.85599	2.34373	Non-Specific
1	2	CSRP2	0.032	2.184	31.25	1.12697	4.96578	Non-Specific
3	39	PSMA5	0.117	1.153	8.54701	0.205393	3.09542	Selective
22	82	LARS	0.03	13.821	33.3333	3.78879	5.05889	Competed and Selective
17	78	HDLBP	0.03	10.156	33.3333	3.34426	5.05889	Competed and Selective
7	87	FEN1	0.03	9.645	33.3333	3.26978	5.05889	Competed and Selective
3	22	TPD52L2	0.118	1.107	8.47458	0.146655	3.08314	Selective
1	4	GET4	0.096	1.176	10.4167	0.233888	3.38082	Non-Specific
1	3	GSTM2	0.056	5.581	17.8571	2.48052	4.15843	Non-Specific
9	47	DDX1	0.03	8.605	33.3333	3.10518	5.05889	Competed and Selective
1	1	LYZ	0.608	3.152	1.64474	1.65627	0.717857	Non-Specific
6	40	FBL	0.03	7.619	33.3333	2.9296	5.05889	Competed and Selective
9	72	DPP3	0.052	1.098	19.2308	0.134878	4.26534	Selective
24	136	EFTUD2	0.03	6.318	33.3333	2.65947	5.05889	Competed and Selective
1	12	CD81	0.018	2.479	55.5556	1.30976	5.79586	Non-Specific
2	5	AK6; TAF9	0.03	6.027	33.3333	2.59144	5.05889	Competed and Selective
14	144	RPN1	0.03	3.093	33.3333	1.62901	5.05889	Competed and Selective
2	65	KRT73	1.273	0.921	0.785546	-0.118727	-0.348232	Non-Specific
1	8	AGTRAP	0.475	0.704	2.10526	-0.506353	1.074	Non-Specific
1	3	COMMD4	1.615	0.449	0.619195	-1.15521	-0.691534	Non-Specific
3	22	PSMB6	0.219	1.489	4.56621	0.574344	2.191	Selective
1	4	GINS1	0.035	2.485	28.5714	1.31325	4.8365	Non-Specific
2	11	NEDD8	0.03	4.642	33.3333	2.21475	5.05889	Competed and Selective
4	11	EIF2S2	0.03	4.569	33.3333	2.19188	5.05889	Competed and Selective
10	63	STT3A	0.03	3.609	33.3333	1.8516	5.05889	Competed and Selective
2	3	LLGL1	0.086	6.84	11.6279	2.774	3.53952	Non-Specific
29	166	EIF3A	0.03	6.901	33.3333	2.78681	5.05889	Competed and Selective
1	1	ZC3H11A	0.166	9.513	6.0241	3.2499	2.59074	Non-Specific
2	14	MTDH	0.03	3.042	33.3333	1.60502	5.05889	Competed and Selective
3	5	NDUFS2	0.03	2.097	33.3333	1.06833	5.05889	Competed and Selective
16	132	COPB1	0.03	3.781	33.3333	1.91877	5.05889	Competed and Selective
16	101	PFKP	0.03	4.939	33.3333	2.30422	5.05889	Competed and Selective
1	1	WDR82	0.118	3.397	8.47458	1.76426	3.08314	Non-Specific
15	808	TUBB3	0.03	32.138	33.3333	5.00621	5.05889	Competed and Selective
5	16	ABCF2	0.031	24.343	32.2581	4.60544	5.01159	Competed and Selective
7	22	EPS8L2	0.031	11.574	32.2581	3.53282	5.01159	Competed and Selective
2	4	TNKS1BP1	1.348	0.149	0.74184	-2.74662	-0.43082	Non-Specific
2	2	PDLIM7	0.07	4.497	14.2857	2.16896	3.8365	Non-Specific
20	102	ACLY	0.031	10.165	32.2581	3.34554	5.01159	Competed and Selective
16	132	EIF3L	0.031	4.372	32.2581	2.12829	5.01159	Competed and Selective
4	27	RPL35	0.031	6.275	32.2581	2.64962	5.01159	Competed and Selective
1	9	CNIH4	0.014	2.012	71.4286	1.00863	6.15843	Non-Specific
1	1	KIF2A	0.071	8.705	14.0845	3.12184	3.81604	Non-Specific
7	12	AP3B1	0.031	5.771	32.2581	2.52882	5.01159	Competed and Selective
1	1	MKI67	0.06	4.602	16.6667	2.20226	4.05889	Non-Specific
83	306	PLEC	0.031	9.035	32.2581	3.17552	5.01159	Competed and Selective
2	2	EFTUD1; EFL1	0.066	3.08	15.1515	1.62293	3.92139	Non-Specific
3	7	TMEM33	0.031	3.159	32.2581	1.65947	5.01159	Competed and Selective
11	40	CPD	0.105	1.359	9.52381	0.442545	3.25154	Selective
1	7	PITHD1	0.069	2.876	14.4928	1.52406	3.85726	Non-Specific
27	845	KRT9	1.014	1.228	0.986193	0.296311	-0.0200577	Non-Specific
2	19	ACAA2	0.031	2.315	32.2581	1.21101	5.01159	Competed and Selective
3	21	RCN1	0.059	0.737	16.9492	-0.440263	4.08314	Selective
1	1	DCAF16	0.145	3.275	6.89655	1.71149	2.78588	Non-Specific
6	19	ERO1L; ERO1A	0.103	1.244	9.70874	0.314986	3.27928	Selective
1	1	PIK3R4	1.892	0.956	0.528541	-0.0649175	-0.919912	Non-Specific
1	11	C19orf70	0.072	2.681	13.8889	1.42277	3.79586	Non-Specific
1	2		0.767	0.417	1.30378	-1.26188	0.382702	Non-Specific
15	48	SMC2	0.032	20.028	31.25	4.32395	4.96578	Competed and Selective
2	4	TRMT1L	0.081	5.753	12.3457	2.52431	3.62593	Non-Specific
2	2	RCC1	0.02	82.008	50	6.35769	5.64386	Non-Specific
11	604	ACTC1	0.121	1.154	8.26446	0.206643	3.04692	Selective
4	26	HMGB2	0.032	6.798	31.25	2.76511	4.96578	Competed and Selective
1	3	NUP54	0.434	3.545	2.30415	1.82579	1.20423	Non-Specific
3	6	SEC23B	0.032	4.063	31.25	2.02255	4.96578	Competed and Selective
11	157	PA2G4	0.032	3.59	31.25	1.84398	4.96578	Competed and Selective
14	149	RPN2	0.032	3.128	31.25	1.64524	4.96578	Competed and Selective
1	12	COTL1	0.157	1.41	6.36943	0.495695	2.67116	Non-Specific
25	64	CAD	0.033	22.159	30.303	4.46982	4.92139	Competed and Selective
6	18	YARS2	0.033	13.584	30.303	3.76384	4.92139	Competed and Selective
6	13	SRPK1	0.033	11.79	30.303	3.55949	4.92139	Competed and Selective
2	4	EIF2B3	0.076	3.442	13.1579	1.78325	3.71786	Non-Specific
2	2	GNA11	0.031	2.981	32.2581	1.5758	5.01159	Non-Specific
9	65	IGF2BP3	0.033	8.353	30.303	3.06229	4.92139	Competed and Selective
9	149	RPL3	0.033	6.792	30.303	2.76384	4.92139	Competed and Selective
1	12	M6PR	0.027	1.079	37.037	0.109695	5.2109	Non-Specific
1	1	TCEAL4	0.142	2.25	7.04225	1.16993	2.81604	Non-Specific
23	128	KIF5B	0.033	6.997	30.303	2.80674	4.92139	Competed and Selective
1	2	PTDSS2	0.08	2.963	12.5	1.56706	3.64386	Non-Specific
17	100	USP7	0.033	5.499	30.303	2.45917	4.92139	Competed and Selective
5	10	PRPF40A	0.033	4.418	30.303	2.14339	4.92139	Competed and Selective
100	695	AHNAK	0.033	3.583	30.303	1.84117	4.92139	Competed and Selective
6	33	MAPK1	0.033	3.575	30.303	1.83794	4.92139	Competed and Selective
3	15	IPO9	0.033	3.046	30.303	1.60692	4.92139	Competed and Selective
3	34	GNAI2	0.033	2.991	30.303	1.58063	4.92139	Competed and Selective
2	6	C7orf50	0.034	22.276	29.4118	4.47742	4.87832	Competed and Selective
34	104	CKAP5	0.034	18.371	29.4118	4.19936	4.87832	Competed and Selective
1	4	CCNB1	0.061	20.297	16.3934	4.34319	4.03505	Non-Specific
1	1	C4orf27; HPF1	0.112	5.934	8.92857	2.569	3.15843	Non-Specific
1	3	DCK	0.068	2.363	14.7059	1.24062	3.87832	Non-Specific
24	56	MYBBP1A	0.034	13.506	29.4118	3.75553	4.87832	Competed and Selective
4	9	SLFN11	0.034	8.747	29.4118	3.12879	4.87832	Competed and Selective
1	1	RAB3GAP1	0.079	6.985	12.6582	2.80426	3.662	Non-Specific
2	2	LRRFIP1	0.101	1.832	9.90099	0.87342	3.30757	Non-Specific
4	27	TSFM	0.034	4.8	29.4118	2.26303	4.87832	Competed and Selective
4	28	TPP1	0.272	1.265	3.67647	0.339137	1.87832	Selective
37	107	PRPF8	0.034	19.619	29.4118	4.29418	4.87832	Competed and Selective
2	6	SEC63	0.114	1.305	8.77193	0.38405	3.13289	Selective
7	30	PTPN1	0.034	4.224	29.4118	2.07861	4.87832	Competed and Selective
4	30	TIMM44	0.034	3.993	29.4118	1.99747	4.87832	Competed and Selective
1	47	RPL37A	0.098	6.44	10.2041	2.68706	3.35107	Non-Specific
1	1	MRPS15	0.055	34.528	18.1818	5.10969	4.18442	Non-Specific
3	3	IPO11	0.037	1.808	27.027	0.854395	4.75633	Non-Specific
28	124	SF3B1	0.034	8.581	29.4118	3.10115	4.87832	Competed and Selective
1	4	FBXL4	1.117	0.99	0.895255	-0.0144996	-0.159629	Non-Specific
1	2	CLIP1	0.335	1.269	2.98507	0.343692	1.57777	Non-Specific
1	10	HSPB8	0.104	1.048	9.61538	0.0676387	3.26534	Non-Specific
4	27	DRG1	0.034	3.66	29.4118	1.87184	4.87832	Competed and Selective
1	1	PPFIBP1	0.146	5.759	6.84932	2.52582	2.77596	Non-Specific
17	107	MCM3	0.034	4.606	29.4118	2.20351	4.87832	Competed and Selective
1	3	FN3KRP	1.009	0.429	0.99108	-1.22095	-0.0129262	Non-Specific
7	31	SFXN1	0.034	2.642	29.4118	1.40163	4.87832	Competed and Selective
3	16	DDX23	0.035	17.859	28.5714	4.15858	4.8365	Competed and Selective
6	10	PRPF6	0.035	15.964	28.5714	3.99675	4.8365	Competed and Selective
1	2	PTCD3	0.311	3.128	3.21543	1.64524	1.68501	Non-Specific
12	95	IGF2BP1	0.035	7.432	28.5714	2.89375	4.8365	Competed and Selective
1	5	PWP1	0.088	4.116	11.3636	2.04124	3.50635	Non-Specific
8	44	ADSL	0.035	5.243	28.5714	2.39039	4.8365	Competed and Selective
1	2	ABRACL	0.274	1.071	3.64964	0.0989585	1.86775	Non-Specific
2	4	ILVBL	0.087	4.287	11.4943	2.09997	3.52284	Non-Specific
10	40	FXR1	0.035	5.028	28.5714	2.32998	4.8365	Competed and Selective
1	1	ZRANB2	0.25	2.402	4	1.26424	2	Non-Specific
2	4	TBC1D10B	0.064	7.112	15.625	2.83026	3.96578	Non-Specific
5	37	ACTR3	0.035	4.429	28.5714	2.14698	4.8365	Competed and Selective
84	227	DYNC1H1	0.035	16.093	28.5714	4.00836	4.8365	Competed and Selective
7	135	PLS1	0.182	1.289	5.49451	0.366252	2.45799	Selective
4	31	RPS19	0.035	3.458	28.5714	1.78994	4.8365	Competed and Selective
2	8	PGRMC2	0.041	1.225	24.3902	0.292782	4.60823	Selective
1	17	TMX2	0.033	2.854	30.303	1.51299	4.92139	Non-Specific
4	35	TYMS	0.035	3.261	28.5714	1.70531	4.8365	Competed and Selective
5	22	ADSS	0.035	3.045	28.5714	1.60644	4.8365	Competed and Selective
13	187	EIF3E	0.035	2.884	28.5714	1.52807	4.8365	Competed and Selective
2	16	ERP29	0.035	1.718	28.5714	0.78073	4.8365	Competed and Selective
4	6	GNL3	0.036	19.653	27.7778	4.29668	4.79586	Competed and Selective
5	27	ACSL4	0.036	14.786	27.7778	3.88616	4.79586	Competed and Selective
2	36	DSTN	0.036	11.861	27.7778	3.56815	4.79586	Competed and Selective
6	15	METAP2	0.036	11.186	27.7778	3.48362	4.79586	Competed and Selective
2	5	POP1	0.036	9.915	27.7778	3.30961	4.79586	Competed and Selective
7	31	ARCN1	0.036	7.041	27.7778	2.81578	4.79586	Competed and Selective
5	37	BCLAF1	0.036	6.444	27.7778	2.68796	4.79586	Competed and Selective
7	46	RBM14; RBM14-RBM4	0.036	6.187	27.7778	2.62924	4.79586	Competed and Selective
4	7	PRIM2	0.036	5.88	27.7778	2.55582	4.79586	Competed and Selective
11	85	TMPO	0.036	5.697	27.7778	2.5102	4.79586	Competed and Selective
2	6	LYPLA1	0.131	1.258	7.63359	0.331132	2.93236	Selective
2	28	SEPT8	0.036	4.368	27.7778	2.12697	4.79586	Competed and Selective
24	256	XRCC5	0.036	3.796	27.7778	1.92448	4.79586	Competed and Selective
6	57	SLC25A3	0.036	3.918	27.7778	1.97012	4.79586	Competed and Selective
5	6	ACACA	0.036	3.131	27.7778	1.64662	4.79586	Competed and Selective
4	43	SNRNP70	0.036	3.123	27.7778	1.64293	4.79586	Competed and Selective
45	163	DSP	0.037	14.669	27.027	3.8747	4.75633	Competed and Selective
7	41	RCC2	0.037	9.179	27.027	3.19834	4.75633	Competed and Selective
1	4	TEX10	0.077	7.009	12.987	2.80921	3.699	Non-Specific
10	89	PRPF19	0.037	8.494	27.027	3.08644	4.75633	Competed and Selective
4	18	AP2A2	0.037	6.705	27.027	2.74524	4.75633	Competed and Selective
1	1	AGPAT2	0.026	2.108	38.4615	1.07587	5.26534	Non-Specific
2	22	FAU	0.037	5.473	27.027	2.45233	4.75633	Competed and Selective
16	115	MCM2	0.037	5.445	27.027	2.44493	4.75633	Competed and Selective
9	67	LRRC59	0.037	5.284	27.027	2.40163	4.75633	Competed and Selective
1	3	LIMA1	0.103	4.866	9.70874	2.28274	3.27928	Non-Specific
68	1131	FLNA	0.037	4.942	27.027	2.3051	4.75633	Competed and Selective
4	5	NSF	0.037	4.238	27.027	2.08338	4.75633	Competed and Selective
14	59	STAT1	0.037	4.231	27.027	2.081	4.75633	Competed and Selective
1	1	ARMC3	0.136	1.028	7.35294	0.0398403	2.87832	Non-Specific
4	20	GPS1	0.037	3.697	27.027	1.88636	4.75633	Competed and Selective
4	24	SLC16A1	0.037	3.604	27.027	1.8496	4.75633	Competed and Selective
11	143	SFPQ	0.037	3.352	27.027	1.74502	4.75633	Competed and Selective
3	15	NANS	0.037	3.044	27.027	1.60597	4.75633	Competed and Selective
3	9	CMPK1	0.037	1.886	27.027	0.91533	4.75633	Competed and Selective
5	12	FAM120A	0.038	21.098	26.3158	4.39903	4.71786	Competed and Selective
14	172	KPNA2	0.038	2.897	26.3158	1.53456	4.71786	Competed and Selective
3	21	ALDH9A1	0.038	5.887	26.3158	2.55753	4.71786	Competed and Selective
6	173	RPL10A	0.038	5.8	26.3158	2.53605	4.71786	Competed and Selective
16	168	CS	0.038	3.587	26.3158	1.84278	4.71786	Competed and Selective
1	4	MAP3K7	0.088	6.205	11.3636	2.63343	3.50635	Non-Specific
2	19	RPS11	0.038	4.547	26.3158	2.18492	4.71786	Competed and Selective
6	54	NUDT21	0.294	1.367	3.40136	0.451013	1.76611	Selective
12	297	HNRNPU	0.038	5.129	26.3158	2.35868	4.71786	Competed and Selective
1	2	TOMM20	0.02	2.808	50	1.48954	5.64386	Non-Specific
1	1	SRGAP1	0.111	3.761	9.00901	1.91112	3.17137	Non-Specific
9	31	IMMT	0.038	3.945	26.3158	1.98003	4.71786	Competed and Selective
1	5	SPATA18	0.061	3.906	16.3934	1.96569	4.03505	Non-Specific
7	69	MTCH2	0.038	2.358	26.3158	1.23756	4.71786	Competed and Selective
2	38	SSR1	0.038	1.59	26.3158	0.669027	4.71786	Competed and Selective
1	1	BAG2	0.106	38.026	9.43396	5.24891	3.23786	Non-Specific
1	1	NDUFAF4	0.252	2.466	3.96825	1.30217	1.9885	Non-Specific
1	1	PRKCI	0.19	3.591	5.26316	1.84439	2.39593	Non-Specific
1	11	MRPS7	0.106	4.552	9.43396	2.1865	3.23786	Non-Specific
12	372	EIF4A2	0.039	4.578	25.641	2.19472	4.68038	Competed and Selective
5	9	GEMIN5	0.039	12.28	25.641	3.61824	4.68038	Competed and Selective
4	9	CSTF1	0.039	11.338	25.641	3.50309	4.68038	Competed and Selective
1	1	MTPAP	0.053	12.843	18.8679	3.68291	4.23786	Non-Specific
2	5	GNB1	0.039	11.097	25.641	3.4721	4.68038	Competed and Selective
5	19	BRIX1	0.039	8.087	25.641	3.0156	4.68038	Competed and Selective
16	61	COPG1	0.039	7.373	25.641	2.88225	4.68038	Competed and Selective
8	66	PDLIM1	0.041	1.068	24.3902	0.0949116	4.60823	Selective
4	9	DPM1	0.039	6.469	25.641	2.69354	4.68038	Competed and Selective
6	27	SF3B2	0.039	6.229	25.641	2.639	4.68038	Competed and Selective
1	3	CYB5R1	0.145	71.683	6.89655	6.16356	2.78588	Non-Specific
1	5	NUTF2	0.119	1.812	8.40336	0.857583	3.07097	Non-Specific
56	489	FASN	0.039	6.119	25.641	2.6133	4.68038	Competed and Selective
20	136	ILF3	0.039	5.524	25.641	2.46571	4.68038	Competed and Selective
1	3	OXSR1	0.048	2.665	20.8333	1.41414	4.38082	Non-Specific
12	75	PSMD12	0.039	4.983	25.641	2.31701	4.68038	Competed and Selective
7	13	SEC23A	0.039	4.598	25.641	2.20101	4.68038	Competed and Selective
5	13	IDH3B	0.039	3.977	25.641	1.99168	4.68038	Competed and Selective
15	122	ATP2A2	0.039	3.279	25.641	1.71326	4.68038	Competed and Selective
5	38	C12orf5; TIGAR	0.039	2.386	25.641	1.25459	4.68038	Competed and Selective
40	138	MYH10	0.039	28.251	25.641	4.82023	4.68038	Competed and Selective
5	12	ZFR	0.04	17.658	25	4.14225	4.64386	Competed and Selective
2	5	LYAR	0.04	11.941	25	3.57785	4.64386	Competed and Selective
7	20	NDUFA9	0.04	6.981	25	2.80343	4.64386	Competed and Selective
16	216	MATR3	0.04	4.948	25	2.30685	4.64386	Competed and Selective
1	5	NHP2L1; SNU13	0.072	66.149	13.8889	6.04765	3.79586	Non-Specific
28	278	CAND1	0.04	3.648	25	1.86711	4.64386	Competed and Selective
5	16	UGDH	0.04	3.995	25	1.9982	4.64386	Competed and Selective
10	36	LARP1	0.04	3.92	25	1.97085	4.64386	Competed and Selective
2	2	FTSJ1	0.175	18.931	5.71429	4.24268	2.51457	Non-Specific
1	1	MRPL46	0.094	2.808	10.6383	1.48954	3.4112	Non-Specific
5	59	LASP1	0.213	1.315	4.69484	0.395063	2.23107	Selective
14	105	KRT16	0.808	2.793	1.23762	1.48182	0.307573	Competed
13	74	PSMD3	0.04	3.91	25	1.96717	4.64386	Competed and Selective
40	211	IQGAP1	0.04	5.487	25	2.45602	4.64386	Competed and Selective
6	33	ETF1	0.04	3.364	25	1.75018	4.64386	Competed and Selective
40	101	SPTBN1	0.04	10.929	25	3.45009	4.64386	Competed and Selective
5	17	LBR	0.04	2.733	25	1.45049	4.64386	Competed and Selective
1	11	GRSF1	0.064	3.452	15.625	1.78743	3.96578	Non-Specific
1	4	SNX12	0.026	3.57	38.4615	1.83592	5.26534	Non-Specific
7	196	ARF4	0.04	1.658	25	0.729444	4.64386	Competed and Selective
1	1	KRT78	1.973	0.594	0.506842	-0.751465	-0.980391	Non-Specific
3	5	DARS2	0.041	22.103	24.3902	4.46617	4.60823	Competed and Selective
2	3	DDX24	0.083	4.62	12.0482	2.20789	3.59074	Non-Specific
5	12	MSH6	0.041	20.666	24.3902	4.36919	4.60823	Competed and Selective
6	18	TRIM25	0.041	13.717	24.3902	3.77789	4.60823	Competed and Selective
3	12	SLC25A10	0.041	12.003	24.3902	3.58532	4.60823	Competed and Selective
7	17	SLC25A13	0.041	6.254	24.3902	2.64478	4.60823	Competed and Selective
7	55	RSL1D1	0.041	5.429	24.3902	2.44069	4.60823	Competed and Selective
8	111	RPS2	0.041	4.739	24.3902	2.24458	4.60823	Competed and Selective
3	30	SEC22B	0.041	3.572	24.3902	1.83673	4.60823	Competed and Selective
8	81	RUVBL1	0.041	3.464	24.3902	1.79244	4.60823	Competed and Selective
1	2	SH2D4A	0.104	8.395	9.61538	3.06953	3.26534	Non-Specific
5	28	RAC1	0.041	2.635	24.3902	1.3978	4.60823	Competed and Selective
2	2	PPAN; PPAN-P2RY11	0.129	6.996	7.75194	2.80653	2.95456	Non-Specific
2	5	DEGS1	0.37	0.389	2.7027	-1.36216	1.4344	Selective
11	50	KTN1	0.041	2.614	24.3902	1.38626	4.60823	Competed and Selective
3	6	HAGH	0.444	0.169	2.25225	-2.5649	1.17137	Selective
3	21	DAD1	0.041	1.926	24.3902	0.945608	4.60823	Competed and Selective
3	6	RABL6	0.042	22.599	23.8095	4.49819	4.57347	Competed and Selective
4	13	AP2M1	0.042	11.395	23.8095	3.51033	4.57347	Competed and Selective
8	24	TCOF1	0.042	10.655	23.8095	3.41346	4.57347	Competed and Selective
13	84	KRT14	0.842	0.819	1.18765	-0.288065	0.248108	Non-Specific
17	183	CCT6A	0.042	4.88	23.8095	2.28688	4.57347	Competed and Selective
12	29	CDC5L	0.042	8.783	23.8095	3.13471	4.57347	Competed and Selective
1	1	GAR1	0.039	3.475	25.641	1.79701	4.68038	Non-Specific
4	12	CORO1B	0.042	8.755	23.8095	3.13011	4.57347	Competed and Selective
6	42	RPL18A	0.042	7.888	23.8095	2.97966	4.57347	Competed and Selective
13	223	RPS4X	0.042	6.023	23.8095	2.59048	4.57347	Competed and Selective
5	23	EIF2S1	0.042	6.657	23.8095	2.73487	4.57347	Competed and Selective
8	20	NUP107	0.042	6.604	23.8095	2.72334	4.57347	Competed and Selective
4	74	RPL21	0.042	5.546	23.8095	2.47145	4.57347	Competed and Selective
3	12	SRPRB	0.042	3.367	23.8095	1.75146	4.57347	Competed and Selective
2	16	ARPC2	0.042	3.011	23.8095	1.59024	4.57347	Competed and Selective
1	1	SMAP1	0.189	0.69	5.29101	-0.535332	2.40354	Non-Specific
3	10	BAG3	0.184	1.286	5.43478	0.362891	2.44222	Selective
2	11	YKT6	0.042	2.125	23.8095	1.08746	4.57347	Competed and Selective
3	3	SMARCC2	0.055	12.178	18.1818	3.60621	4.18442	Non-Specific
2	10	NRD1; NRDC	0.097	1.397	10.3093	0.482332	3.36587	Selective
4	39	CLIC1	0.042	1.629	23.8095	0.703987	4.57347	Competed and Selective
1	2	GPR180	0.423	1.645	2.36407	0.718088	1.24127	Non-Specific
1	1	MBD3	0.532	4.108	1.8797	2.03844	0.910502	Non-Specific
2	3	DUSP3	0.08	2.169	12.5	1.11703	3.64386	Non-Specific
2	2	DHCR24	0.127	2.634	7.87402	1.39726	2.9771	Non-Specific
10	17	IKBKAP; ELP1	0.043	16.642	23.2558	4.05676	4.53952	Competed and Selective
8	16	CYFIP2	0.043	12.42	23.2558	3.63459	4.53952	Competed and Selective
2	2	UBXN7	0.077	3.222	12.987	1.68796	3.699	Non-Specific
26	79	TLN1	0.043	9.829	23.2558	3.29704	4.53952	Competed and Selective
5	112	RPS24	0.043	9.599	23.2558	3.26288	4.53952	Competed and Selective
7	23	SMU1	0.043	8.534	23.2558	3.09322	4.53952	Competed and Selective
1	2	KDM3B	0.046	4.751	21.7391	2.24823	4.44222	Non-Specific
15	64		0.043	8.328	23.2558	3.05797	4.53952	Non-Specific
2	13	SETX	0.043	7.783	23.2558	2.96033	4.53952	Competed and Selective
17	69	VARS; VARS2	0.043	6.504	23.2558	2.70133	4.53952	Competed and Selective
1	2	EXOC5	0.043	5.737	23.2558	2.5203	4.53952	Non-Specific
2	4	GSTM3	0.178	2.435	5.61798	1.28392	2.49005	Non-Specific
13	71	ACO2	0.043	6.441	23.2558	2.68728	4.53952	Competed and Selective
5	106	RPS6	0.043	5.36	23.2558	2.42223	4.53952	Competed and Selective
5	6	CLUH; KIAA0664	0.043	4.967	23.2558	2.31237	4.53952	Competed and Selective
10	159	RPS9	0.043	4.813	23.2558	2.26694	4.53952	Competed and Selective
2	3	DPP9	0.19	3.004	5.26316	1.58688	2.39593	Non-Specific
1	7	NIPSNAP1	0.082	2.627	12.1951	1.39342	3.60823	Non-Specific
1	13	TMEM41B	0.06	4.684	16.6667	2.22774	4.05889	Non-Specific
8	86	PTPLAD1; HACD3	0.043	4.427	23.2558	2.14633	4.53952	Competed and Selective
3	4	FTSJD2; CMTR1	0.098	10.391	10.2041	3.37726	3.35107	Non-Specific
14	81	AP1B1	0.043	4.02	23.2558	2.0072	4.53952	Competed and Selective
2	2	NOP16	0.079	8.178	12.6582	3.03175	3.662	Non-Specific
7	79	HMGB1	0.043	3.76	23.2558	1.91073	4.53952	Competed and Selective
15	77	RANGAP1	0.043	3.054	23.2558	1.6107	4.53952	Competed and Selective
2	2	IK	0.053	36.455	18.8679	5.18804	4.23786	Non-Specific
9	85	TNPO1	0.043	1.609	23.2558	0.686164	4.53952	Competed and Selective
2	10	CLPTM1	0.044	34.51	22.7273	5.10894	4.50635	Competed and Selective
3	7	SPTBN2	0.044	21.385	22.7273	4.41853	4.50635	Competed and Selective
8	18	EIF2A	0.044	21.267	22.7273	4.41054	4.50635	Competed and Selective
14	42	GFPT1	0.044	14.29	22.7273	3.83693	4.50635	Competed and Selective
3	5	SCYL1	0.044	11.99	22.7273	3.58376	4.50635	Competed and Selective
17	223	CCT7	0.044	4.519	22.7273	2.176	4.50635	Competed and Selective
12	44	DNM2	0.044	7.611	22.7273	2.92809	4.50635	Competed and Selective
4	65	RPL35A	0.044	7.412	22.7273	2.88986	4.50635	Competed and Selective
3	10	PPP1R7	0.352	1.271	2.84091	0.345964	1.50635	Selective
2	3	EEA1	0.118	1.383	8.47458	0.467801	3.08314	Non-Specific
1	6	EIF4E	0.063	2.068	15.873	1.04824	3.9885	Non-Specific
1	1	GNL2	0.081	10.71	12.3457	3.42089	3.62593	Non-Specific
8	131	RPS7	0.044	6.075	22.7273	2.60288	4.50635	Competed and Selective
13	35	PYGB	0.044	5.148	22.7273	2.36401	4.50635	Competed and Selective
3	5	BCS1L	0.044	4.747	22.7273	2.24702	4.50635	Competed and Selective
13	40	RPS6KA3	0.044	4.573	22.7273	2.19314	4.50635	Competed and Selective
4	52	SEPT11	0.044	3.628	22.7273	1.85917	4.50635	Competed and Selective
10	76	PSMC5	0.044	3.591	22.7273	1.84439	4.50635	Competed and Selective
1	1	ERLIN1	0.62	1.962	1.6129	0.972325	0.68966	Non-Specific
1	9	CHMP1A	1.001	1.053	0.999001	0.0745054	-0.00144197	Non-Specific
11	70	PGD	0.044	2.715	22.7273	1.44095	4.50635	Competed and Selective
2	10	VTA1	0.044	2.713	22.7273	1.43989	4.50635	Competed and Selective
10	78	KARS	0.044	2.467	22.7273	1.30276	4.50635	Competed and Selective
4	122	SURF4	0.044	1.954	22.7273	0.96643	4.50635	Competed and Selective
10	85	LMAN1	0.044	1.617	22.7273	0.69332	4.50635	Competed and Selective
7	11	MYO1B	0.045	21.552	22.2222	4.42975	4.47393	Competed and Selective
4	7	RBM25	0.045	20.496	22.2222	4.35727	4.47393	Competed and Selective
10	37	DDX46	0.045	8.641	22.2222	3.1112	4.47393	Competed and Selective
5	90	RPS15	0.045	5.646	22.2222	2.49723	4.47393	Competed and Selective
9	51	ABCE1	0.045	5.187	22.2222	2.3749	4.47393	Competed and Selective
1	1	THOC6	0.207	5.449	4.83092	2.44599	2.2723	Non-Specific
18	180	SERPINH1	0.045	2.844	22.2222	1.50792	4.47393	Competed and Selective
2	3	PARD3	0.077	3.538	12.987	1.82293	3.699	Non-Specific
8	29	HSD17B12	0.045	4.526	22.2222	2.17824	4.47393	Competed and Selective
13	213	RPL4	0.045	6.879	22.2222	2.7822	4.47393	Competed and Selective
2	9	SDHB	0.045	3.572	22.2222	1.83673	4.47393	Competed and Selective
4	24	WARS	0.045	3.326	22.2222	1.73379	4.47393	Competed and Selective
1	4	PEX14	0.108	1.133	9.25926	0.180148	3.2109	Non-Specific
1	21	TRIM4	0.154	3.738	6.49351	1.90227	2.699	Non-Specific
25	201	XPO1	0.045	2.94	22.2222	1.55582	4.47393	Competed and Selective
41	410	FLNC	0.045	3.116	22.2222	1.6397	4.47393	Competed and Selective
1	1	ASH2L	0.144	3.105	6.94444	1.63459	2.79586	Non-Specific
6	13	POR	0.045	2.837	22.2222	1.50437	4.47393	Competed and Selective
6	22	VPS26A	0.045	2.799	22.2222	1.48491	4.47393	Competed and Selective
5	50	HSPB1	0.578	1.233	1.7301	0.302173	0.790859	Selective
3	14	ILKAP	0.045	2.609	22.2222	1.3835	4.47393	Competed and Selective
18	81	AARS	0.045	2.361	22.2222	1.2394	4.47393	Competed and Selective
4	46	SSR4	0.045	2.246	22.2222	1.16736	4.47393	Competed and Selective
4	33	HNRNPUL1	0.045	2.187	22.2222	1.12895	4.47393	Competed and Selective
2	41	CDK9	0.046	10.785	21.7391	3.43095	4.44222	Competed and Selective
6	21	PRMT5	0.046	8.505	21.7391	3.08831	4.44222	Competed and Selective
3	9	DKC1	0.046	7.374	21.7391	2.88245	4.44222	Competed and Selective
31	1057	KRT1	0.94	1.479	1.06383	0.564622	0.0892673	Non-Specific
4	8	CHID1	0.046	6.199	21.7391	2.63204	4.44222	Competed and Selective
1	5	PEF1	2.267	0.383	0.441112	-1.38458	-1.18078	Non-Specific
6	24	PTPN11	0.046	5.876	21.7391	2.55483	4.44222	Competed and Selective
19	146	RRM1	0.046	4.95	21.7391	2.30743	4.44222	Competed and Selective
3	4	KIAA0020; PUM3	0.121	8.119	8.26446	3.0213	3.04692	Non-Specific
1	9	MYLK	0.08	2.434	12.5	1.28333	3.64386	Non-Specific
8	33	IPO4	0.046	4.422	21.7391	2.1447	4.44222	Competed and Selective
6	79	RBMX	0.046	4.388	21.7391	2.13356	4.44222	Competed and Selective
1	1	RRP8	0.223	0.778	4.4843	-0.362158	2.16488	Non-Specific
5	23	AGK	0.046	3.276	21.7391	1.71194	4.44222	Competed and Selective
4	13	RHOT2	0.046	2.347	21.7391	1.23082	4.44222	Competed and Selective
9	52	PGM2	0.046	1.97	21.7391	0.978196	4.44222	Competed and Selective
20	908	TUBA1A	0.046	5.875	21.7391	2.55459	4.44222	Competed and Selective
17	185	DDX3X	0.047	9.81	21.2766	3.29425	4.4112	Competed and Selective
4	11	PPP2R5D	0.047	7.364	21.2766	2.88049	4.4112	Competed and Selective
1	5	GNG12	0.06	6.084	16.6667	2.60502	4.05889	Non-Specific
1	1	C3P1	0.847	0.879	1.18064	-0.186065	0.239566	Non-Specific
4	7	LEMD3	0.047	5.817	21.2766	2.54028	4.4112	Competed and Selective
9	191	RPL13	0.047	4.869	21.2766	2.28363	4.4112	Competed and Selective
19	98	EIF3B	0.047	4.688	21.2766	2.22897	4.4112	Competed and Selective
2	4	TFAM	0.046	4.432	21.7391	2.14796	4.44222	Non-Specific
1	5	ATP6V0D1	0.194	4.042	5.15464	2.01507	2.36587	Non-Specific
1	5	EFHC2	11.783	0.031	0.084868	-5.01159	-3.55863	Non-Specific
13	97	TMPO	0.047	4.475	21.2766	2.16189	4.4112	Competed and Selective
3	80	RPL24	0.047	4.423	21.2766	2.14503	4.4112	Competed and Selective
5	24	SLC25A24	0.047	3.211	21.2766	1.68302	4.4112	Competed and Selective
1	2	DDRGK1	0.056	1.722	17.8571	0.784085	4.15843	Non-Specific
2	3	KDELC2	0.279	1.086	3.58423	0.119024	1.84166	Non-Specific
8	99	EEF1D	0.047	3.106	21.2766	1.63506	4.4112	Competed and Selective
4	47	GLO1	0.299	1.345	3.34448	0.427606	1.74178	Selective
2	3	EXOC1	0.202	3.299	4.9505	1.72203	2.30757	Non-Specific
4	28	TOMM22	0.047	2.669	21.2766	1.4163	4.4112	Competed and Selective
1	10	TMEM97	0.064	2.137	15.625	1.09559	3.96578	Non-Specific
7	26	PPP6R3	0.047	2.485	21.2766	1.31325	4.4112	Competed and Selective
15	125	MCM6	0.047	2.436	21.2766	1.28451	4.4112	Competed and Selective
3	22	PPP2R4; PTPA	0.047	2.397	21.2766	1.26123	4.4112	Competed and Selective
14	160	PABPC4	0.047	2.348	21.2766	1.23143	4.4112	Competed and Selective
12	155	PPP2R1A	0.047	2.247	21.2766	1.168	4.4112	Competed and Selective
1	2	B3GNT1; B4GAT1	0.14	7.621	7.14286	2.92998	2.8365	Non-Specific
2	5	PLAA	0.047	2.167	21.2766	1.1157	4.4112	Competed and Selective
5	13	SUPT16H	0.048	33.62	20.8333	5.07125	4.38082	Competed and Selective
1	39	CDC42	0.019	1.441	52.6316	0.52707	5.71786	Non-Specific
4	10	PAFAH1B1	0.048	29.441	20.8333	4.87975	4.38082	Competed and Selective
4	7	TOP1	0.048	22.028	20.8333	4.46127	4.38082	Competed and Selective
8	20	POLA1	0.048	12.008	20.8333	3.58592	4.38082	Competed and Selective
1	4	ITPA	0.055	10.029	18.1818	3.32611	4.18442	Non-Specific
6	16	KIF11	0.048	6.748	20.8333	2.75446	4.38082	Competed and Selective
5	8	AP3M1	0.048	6.444	20.8333	2.68796	4.38082	Competed and Selective
5	19	KIAA1279; KIF1BP	0.048	5.381	20.8333	2.42787	4.38082	Competed and Selective
9	236	RPS13	0.048	4.932	20.8333	2.30217	4.38082	Competed and Selective
5	30	ASS1	0.048	4.595	20.8333	2.20006	4.38082	Competed and Selective
5	7	ERMP1	0.414	1.365	2.41546	0.448901	1.2723	Selective
6	27	ATXN2L	0.048	4.036	20.8333	2.01293	4.38082	Competed and Selective
9	43	NMT1	0.048	3.972	20.8333	1.98987	4.38082	Competed and Selective
6	23	EIF3H	0.048	3.874	20.8333	1.95382	4.38082	Competed and Selective
8	76	ETFB	0.048	3.042	20.8333	1.60502	4.38082	Competed and Selective
26	227	FLNB	0.048	3.243	20.8333	1.69733	4.38082	Competed and Selective
3	14	SAE1	0.048	2.475	20.8333	1.30743	4.38082	Competed and Selective
6	22	LETM1	0.048	1.882	20.8333	0.912267	4.38082	Competed and Selective
2	2	CYP51A1	0.135	3.058	7.40741	1.61259	2.88897	Non-Specific
1	2	PTPMT1	0.037	17.452	27.027	4.12532	4.75633	Non-Specific
1	2	DCTPP1	0.162	1.157	6.17284	0.210389	2.62593	Non-Specific
4	7	CLPB	0.049	13.337	20.4082	3.73736	4.35107	Competed and Selective
7	14	NCAPD2	0.049	12.369	20.4082	3.62866	4.35107	Competed and Selective
4	8	GIGYF2	0.049	9.432	20.4082	3.23756	4.35107	Competed and Selective
23	89	UPF1	0.049	6.208	20.4082	2.63413	4.35107	Competed and Selective
10	125	RPS3A	0.049	6.195	20.4082	2.6311	4.35107	Competed and Selective
8	34	STAU1	0.049	5.362	20.4082	2.42277	4.35107	Competed and Selective
1	9	LSM4	0.072	3.391	13.8889	1.76171	3.79586	Non-Specific
1	1	DNAJB1	0.031	13.094	32.2581	3.71083	5.01159	Non-Specific
36	166		0.049	10.105	20.4082	3.337	4.35107	Non-Specific
2	14	ATP5J2	0.049	4.479	20.4082	2.16318	4.35107	Competed and Selective
7	34	KLC2	0.049	3.749	20.4082	1.90651	4.35107	Competed and Selective
1	3	SUMO1	0.174	2.491	5.74713	1.31673	2.52284	Non-Specific
3	12	PSMD10	0.049	3.334	20.4082	1.73725	4.35107	Competed and Selective
3	33	UBE2I	0.049	3.134	20.4082	1.64801	4.35107	Competed and Selective
4	43	HNRNPH3	0.049	2.802	20.4082	1.48646	4.35107	Competed and Selective
5	43	ARPC4	0.049	2.549	20.4082	1.34993	4.35107	Competed and Selective
5	38	VAT1	0.049	1.896	20.4082	0.922959	4.35107	Competed and Selective
5	26	U2SURP	0.05	24.926	20	4.63958	4.32193	Competed and Selective
13	145	TFRC	0.07	1.437	14.2857	0.52306	3.8365	Selective
2	7	UBE2N	0.194	1.378	5.15464	0.462576	2.36587	Selective
22	63	NUMA1	0.05	11.962	20	3.58039	4.32193	Competed and Selective
6	11	LRRC47	0.05	7.298	20	2.8675	4.32193	Competed and Selective
5	18	CAT	0.125	1.286	8	0.362891	3	Selective
5	11	AP2A1	0.05	6.881	20	2.78262	4.32193	Competed and Selective
10	324	PRDX4	0.17	0.945	5.88235	-0.0816138	2.55639	Selective
13	106	HADHA	0.05	4.312	20	2.10836	4.32193	Competed and Selective
21	197	SF3B3	0.05	3.1	20	1.63227	4.32193	Competed and Selective
4	40	BZW2	0.05	2.695	20	1.43029	4.32193	Competed and Selective
2	6	COPS4	0.05	2.649	20	1.40545	4.32193	Competed and Selective
5	14	PAK2	0.05	2.551	20	1.35106	4.32193	Competed and Selective
7	44	CSNK2A1	0.05	2.549	20	1.34993	4.32193	Competed and Selective
2	15	MAD2L1	0.05	2.508	20	1.32654	4.32193	Competed and Selective
17	153	IPO7	0.05	2.185	20	1.12763	4.32193	Competed and Selective
2	24	VAPA	0.05	2.136	20	1.09491	4.32193	Competed and Selective
2	24	MARCKS	0.3	1.199	3.33333	0.261832	1.73697	Selective
1	3	ELOVL1	0.159	13.023	6.28931	3.70299	2.6529	Non-Specific
3	8	NAT10	0.051	37.782	19.6078	5.23963	4.29336	Competed and Selective
9	15	NUP205	0.051	9.413	19.6078	3.23465	4.29336	Competed and Selective
7	18	NUP155	0.051	7.372	19.6078	2.88206	4.29336	Competed and Selective
2	4	ARF6	0.039	1.886	25.641	0.91533	4.68038	Non-Specific
1	3	NDUFS8	0.024	2.851	41.6667	1.51147	5.38082	Non-Specific
15	75	MCM4	0.051	6.728	19.6078	2.75018	4.29336	Competed and Selective
4	9	PRPS1	0.051	5.533	19.6078	2.46806	4.29336	Competed and Selective
16	249	CCT3	0.051	4.279	19.6078	2.09727	4.29336	Competed and Selective
17	107	GMPS	0.051	4.305	19.6078	2.10601	4.29336	Competed and Selective
6	52	PPP1CA	0.051	4.027	19.6078	2.00971	4.29336	Competed and Selective
6	111	RPL23A	0.051	3.985	19.6078	1.99458	4.29336	Competed and Selective
19	56	KIAA0368	0.051	3.793	19.6078	1.92334	4.29336	Competed and Selective
12	68	PSMD13	0.051	3.725	19.6078	1.89724	4.29336	Competed and Selective
6	28	SAFB	0.051	3.031	19.6078	1.59979	4.29336	Competed and Selective
8	66	CDK2	0.051	2.905	19.6078	1.53854	4.29336	Competed and Selective
3	57	TARDBP	0.051	2.766	19.6078	1.4678	4.29336	Competed and Selective
2	36	PTGES3	0.051	2.656	19.6078	1.40926	4.29336	Competed and Selective
2	9	ADD1	0.051	2.115	19.6078	1.08066	4.29336	Competed and Selective
2	21	SEC11A	0.051	1.894	19.6078	0.921436	4.29336	Competed and Selective
4	16	FAF2	0.172	0.723	5.81395	-0.467932	2.53952	Selective
5	35	ATP1B3	0.061	1.367	16.3934	0.451013	4.03505	Selective
6	12	NUP133	0.052	13.012	19.2308	3.70177	4.26534	Competed and Selective
1	1	SETD1B	21.554	3.129	0.0463951	1.6457	-4.42988	Non-Specific
1	1	VAMP7	0.147	18.648	6.80272	4.22095	2.76611	Non-Specific
7	23	SRP72	0.052	12.092	19.2308	3.59598	4.26534	Competed and Selective
1	4	MSMP	0.675	1.006	1.48148	0.00863031	0.567041	Non-Specific
3	5	STAG2	0.052	10.23	19.2308	3.35473	4.26534	Competed and Selective
3	9	RNASEH2B	0.052	9.259	19.2308	3.21086	4.26534	Competed and Selective
3	34	TRA2B	0.7	2.142	1.42857	1.09896	0.514573	Competed
20	205	DDX17	0.052	6.068	19.2308	2.60122	4.26534	Competed and Selective
5	29	SNRPA1	0.052	5.92	19.2308	2.5656	4.26534	Competed and Selective
15	851	GAPDH	0.455	1.236	2.1978	0.305679	1.13606	Selective
1	5	UQCRQ	0.051	2.531	19.6078	1.33971	4.29336	Non-Specific
5	135	RPL5	0.052	5.821	19.2308	2.54127	4.26534	Competed and Selective
14	159	EIF4A3	0.052	5.68	19.2308	2.50589	4.26534	Competed and Selective
15	93	PSMC2	0.052	5.194	19.2308	2.37685	4.26534	Competed and Selective
14	283	CCT4	0.052	4.292	19.2308	2.10165	4.26534	Competed and Selective
8	26	DDX6	0.052	4.659	19.2308	2.22002	4.26534	Competed and Selective
1	2	ARAF	0.371	3.935	2.69542	1.97636	1.43051	Non-Specific
6	150	RPS17; RPS17L	0.052	4.632	19.2308	2.21164	4.26534	Competed and Selective
3	86	HIST1H2AG; HIST1H2AM; HIST1H2AI; HIST1H2AK; HIST1H2AL	0.052	4.296	19.2308	2.10299	4.26534	Competed and Selective
23	1236	TUBB	0.052	3.67	19.2308	1.87578	4.26534	Competed and Selective
4	60	SNRPD1	0.052	3.717	19.2308	1.89414	4.26534	Competed and Selective
2	5	MRPL47	0.052	3.532	19.2308	1.82049	4.26534	Competed and Selective
19	153	PSMD2	0.052	3.454	19.2308	1.78827	4.26534	Competed and Selective
11	96	API5	0.052	3.168	19.2308	1.66357	4.26534	Competed and Selective
19	89	HYOU1	0.052	3.146	19.2308	1.65352	4.26534	Competed and Selective
1	1	DTX3L	0.122	4.026	8.19672	2.00935	3.03505	Non-Specific
7	41	ACTR2	0.052	2.935	19.2308	1.55336	4.26534	Competed and Selective
2	5	MPI	0.379	1.226	2.63852	0.293959	1.39973	Selective
15	136	ESYT1	0.052	2.776	19.2308	1.47301	4.26534	Competed and Selective
2	7	BCCIP	0.052	2.668	19.2308	1.41576	4.26534	Competed and Selective
8	53	NAP1L1	0.052	2.51	19.2308	1.32769	4.26534	Competed and Selective
19	188	DDB1	0.075	1.458	13.3333	0.543991	3.73697	Selective
2	6	MRPS2	0.052	2.111	19.2308	1.07793	4.26534	Competed and Selective
10	96	RAB7A	0.052	2.045	19.2308	1.0321	4.26534	Competed and Selective
1	2	SYPL1	0.112	1.167	8.92857	0.222805	3.15843	Non-Specific
4	19	COPS6	0.052	1.893	19.2308	0.920674	4.26534	Competed and Selective
1	7	PLCH1	0.125	2.332	8	1.22157	3	Non-Specific
12	27	SKIV2L2	0.053	15.471	18.8679	3.95149	4.23786	Competed and Selective
1	2	MTX2	0.044	1.558	22.7273	0.639695	4.50635	Non-Specific
1	1	WAPAL; WAPL	0.473	2.659	2.11416	1.41088	1.08009	Non-Specific
2	8	SCARB2	0.417	0.133	2.39808	-2.9105	1.26188	Selective
3	6	RFC3	0.053	8.864	18.8679	3.14796	4.23786	Competed and Selective
5	44	ZYX	0.074	1.274	13.5135	0.349365	3.75633	Selective
3	6	TUBGCP2	0.053	7.265	18.8679	2.86096	4.23786	Competed and Selective
1	1	WDR26	0.172	1.216	5.81395	0.282143	2.53952	Non-Specific
8	12	CTNND1	0.053	4.878	18.8679	2.28629	4.23786	Competed and Selective
4	7	TROVE2	0.053	4.621	18.8679	2.20821	4.23786	Competed and Selective
8	13	NNT	0.053	3.932	18.8679	1.97526	4.23786	Competed and Selective
1	2	PDP1	0.145	2.659	6.89655	1.41088	2.78588	Non-Specific
10	218	SLC25A6	0.053	3.715	18.8679	1.89336	4.23786	Competed and Selective
10	51	SLC25A11	0.053	3.168	18.8679	1.66357	4.23786	Competed and Selective
1	1	TEX264	0.153	2.737	6.53595	1.4526	2.7084	Non-Specific
2	3	PTPN9	0.11	5.485	9.09091	2.45549	3.18442	Non-Specific
16	97	DNM1L	0.053	3.101	18.8679	1.63273	4.23786	Competed and Selective
5	48	PPAT	0.053	2.009	18.8679	1.00648	4.23786	Competed and Selective
7	18	NOP58	0.054	15.197	18.5185	3.92571	4.2109	Competed and Selective
1	1	NAF1	0.225	3.83	4.44444	1.93734	2.152	Non-Specific
3	11	DNMT1	0.054	14.495	18.5185	3.85748	4.2109	Competed and Selective
10	26	PDS5A	0.054	12.925	18.5185	3.69209	4.2109	Competed and Selective
12	28	ABCF1	0.054	12.078	18.5185	3.59431	4.2109	Competed and Selective
3	6	SSRP1	0.054	11.702	18.5185	3.54868	4.2109	Competed and Selective
6	26	ATAD3B	0.054	8.571	18.5185	3.09946	4.2109	Competed and Selective
8	90	EIF2S3	0.054	6.101	18.5185	2.60905	4.2109	Competed and Selective
1	4	NPLOC4	0.033	3.554	30.303	1.82944	4.92139	Non-Specific
4	15	ELAC2	0.054	5.63	18.5185	2.49313	4.2109	Competed and Selective
3	6	RFC5	0.054	4.937	18.5185	2.30363	4.2109	Competed and Selective
6	10	COPE	0.054	4.756	18.5185	2.24975	4.2109	Competed and Selective
8	60	PSMC1	0.054	4.643	18.5185	2.21506	4.2109	Competed and Selective
1	1	CC2D1A	0.092	21.967	10.8696	4.45727	3.44222	Non-Specific
7	34	PMPCA	0.054	4.174	18.5185	2.06143	4.2109	Competed and Selective
2	6	RQCD1; CNOT9	0.054	3.563	18.5185	1.83309	4.2109	Competed and Selective
2	16	SRP14	0.054	3.545	18.5185	1.82579	4.2109	Competed and Selective
9	39	NCBP1	0.054	3.468	18.5185	1.7941	4.2109	Competed and Selective
1	1	HEXB	0.51	1.06	1.96078	0.0840643	0.971431	Non-Specific
16	143	KRT18	0.054	3.369	18.5185	1.75232	4.2109	Competed and Selective
6	27	LUC7L3	0.054	3.25	18.5185	1.70044	4.2109	Competed and Selective
2	3	GTF2F1	0.123	7.177	8.13008	2.84338	3.02327	Non-Specific
4	36	PSMB5	0.054	3.211	18.5185	1.68302	4.2109	Competed and Selective
16	96	PSMD1	0.054	2.297	18.5185	1.19975	4.2109	Competed and Selective
3	20	RALY	0.054	2.147	18.5185	1.10232	4.2109	Competed and Selective
5	9	GNPDA1	0.054	2.113	18.5185	1.07929	4.2109	Competed and Selective
3	18	CISD2	0.054	1.576	18.5185	0.656268	4.2109	Competed and Selective
7	34	PFKL	0.055	13.643	18.1818	3.77009	4.18442	Competed and Selective
1	62	MIF	0.212	1.65	4.71698	0.722466	2.23786	Non-Specific
6	9	MAP1B	0.055	10.33	18.1818	3.36877	4.18442	Competed and Selective
1	2	PIN1	0.062	2.774	16.129	1.47197	4.01159	Non-Specific
8	15	DCTN1	0.055	8.295	18.1818	3.05224	4.18442	Competed and Selective
6	15	MRTO4	0.055	7.558	18.1818	2.918	4.18442	Competed and Selective
4	10	AP1G1	0.055	7.497	18.1818	2.90631	4.18442	Competed and Selective
5	10	EDC4	0.055	7.46	18.1818	2.89918	4.18442	Competed and Selective
2	70	RPS26; RPS26P25; LOC101929876	0.055	5.309	18.1818	2.40844	4.18442	Competed and Selective
13	53	XRN2	0.055	4.905	18.1818	2.29425	4.18442	Competed and Selective
4	16	ABCD3	0.055	4.767	18.1818	2.25308	4.18442	Competed and Selective
6	12	KPNA6	0.055	4.307	18.1818	2.10668	4.18442	Competed and Selective
6	20	SCRIB	0.055	3.891	18.1818	1.96014	4.18442	Competed and Selective
3	17	PSPC1	0.055	3.601	18.1818	1.8484	4.18442	Competed and Selective
8	63	PSMC6	0.055	3.6	18.1818	1.848	4.18442	Competed and Selective
6	24	ANXA11	0.116	1.276	8.62069	0.351628	3.1078	Selective
2	5	FKBP8	0.055	2.353	18.1818	1.2345	4.18442	Competed and Selective
5	22	OSBP	0.055	2.202	18.1818	1.13881	4.18442	Competed and Selective
4	11	ISOC2	0.055	1.93	18.1818	0.948601	4.18442	Competed and Selective
3	32	BAX	0.055	1.691	18.1818	0.757877	4.18442	Competed and Selective
8	14	CSTF3	0.056	10.744	17.8571	3.42546	4.15843	Competed and Selective
1	3	SLC29A1	0.091	1.196	10.989	0.258217	3.45799	Non-Specific
4	5	SMARCA5	0.056	10.664	17.8571	3.41468	4.15843	Competed and Selective
4	17	AIMP1	0.056	7.328	17.8571	2.87342	4.15843	Competed and Selective
3	65	RPL23	0.056	7.028	17.8571	2.81311	4.15843	Competed and Selective
18	925	EEF1A1	0.056	4.701	17.8571	2.23297	4.15843	Competed and Selective
3	125	HIST1H2BJ	0.056	3.978	17.8571	1.99204	4.15843	Competed and Selective
1	2	ATPAF1	0.144	1.273	6.94444	0.348232	2.79586	Non-Specific
9	43	KIAA1967; CCAR2	0.056	3.587	17.8571	1.84278	4.15843	Competed and Selective
1	1	LUC7L	0.502	1.773	1.99203	0.826193	0.994241	Non-Specific
2	13	RPRD1B	0.056	3.161	17.8571	1.66038	4.15843	Competed and Selective
11	102	CYB5R3	0.056	3.052	17.8571	1.60975	4.15843	Competed and Selective
3	9	MCCC2	0.056	2.747	17.8571	1.45786	4.15843	Competed and Selective
3	8	TOMM70A; TOMM70	0.056	2.341	17.8571	1.22712	4.15843	Competed and Selective
3	3	SKIV2L	0.378	6.401	2.6455	2.6783	1.40354	Non-Specific
5	15	SERPINB6	0.056	2.309	17.8571	1.20727	4.15843	Competed and Selective
11	84	LTA4H	0.056	1.546	17.8571	0.62854	4.15843	Competed and Selective
2	16	SLC38A2	0.056	1.53	17.8571	0.613532	4.15843	Competed and Selective
6	75	PGRMC1	0.04	1.373	25	0.457332	4.64386	Selective
6	9	RRP12	0.057	12.969	17.5439	3.697	4.13289	Competed and Selective
4	9	FXR2	0.057	11.413	17.5439	3.51261	4.13289	Competed and Selective
4	62	FUS	0.16	1.4	6.25	0.485427	2.64386	Selective
5	77	PSMA6	0.289	1.472	3.46021	0.557778	1.79086	Selective
3	17	DLST	0.417	1.152	2.39808	0.204141	1.26188	Selective
3	9	CERS2	0.048	1.447	20.8333	0.533065	4.38082	Selective
1	1	MACROD1	0.022	4.227	45.4545	2.07963	5.50635	Non-Specific
3	6	EML4	0.057	10.587	17.5439	3.40422	4.13289	Competed and Selective
3	13	ACAT2	0.078	1.158	12.8205	0.211635	3.68038	Selective
2	30	FABP5	0.713	1.605	1.40252	0.682573	0.488026	Competed
8	15	GTF2I	0.057	7.51	17.5439	2.90881	4.13289	Competed and Selective
5	24	DNAJA3	0.057	6.674	17.5439	2.73855	4.13289	Competed and Selective
5	19	CUL2	0.057	4.757	17.5439	2.25005	4.13289	Competed and Selective
10	63	WDR1	0.057	4.598	17.5439	2.20101	4.13289	Competed and Selective
20	432	CKAP4	0.023	1.087	43.4783	0.120352	5.44222	Selective
9	83	CACYBP	0.209	1.29	4.78469	0.367371	2.25843	Selective
9	32	YARS	0.057	4.565	17.5439	2.19061	4.13289	Competed and Selective
35	662	GANAB	0.057	3.636	17.5439	1.86235	4.13289	Competed and Selective
11	43	PSMD6	0.057	3.878	17.5439	1.95531	4.13289	Competed and Selective
1	1	UPF3B	0.083	4.119	12.0482	2.04229	3.59074	Non-Specific
9	38	TRIP13	0.057	3.761	17.5439	1.91112	4.13289	Competed and Selective
4	26	RBM4	0.057	3.017	17.5439	1.59311	4.13289	Competed and Selective
33	250	LRPPRC	0.057	3.515	17.5439	1.81352	4.13289	Competed and Selective
5	15	MGEA5	0.057	2.376	17.5439	1.24853	4.13289	Competed and Selective
6	49	BZW1	0.057	1.913	17.5439	0.935837	4.13289	Competed and Selective
1	12	AP3S1	0.066	1.959	15.1515	0.970117	3.92139	Non-Specific
2	13	SLIRP	0.057	1.885	17.5439	0.914565	4.13289	Competed and Selective
3	7	PSMB7	0.057	1.584	17.5439	0.663572	4.13289	Competed and Selective
2	2	DSG1	0.843	0.698	1.18624	-0.518701	0.246395	Non-Specific
6	9	ZC3HAV1	0.058	17.008	17.2414	4.08814	4.1078	Competed and Selective
1	10	PHF5A	0.273	1.867	3.663	0.900722	1.87303	Non-Specific
2	7	MRPL45	0.058	10.112	17.2414	3.338	4.1078	Competed and Selective
1	1	ZC3H4	0.12	3.402	8.33333	1.76638	3.05889	Non-Specific
3	9	DEK	0.058	7.777	17.2414	2.95921	4.1078	Competed and Selective
4	18	SAFB2	0.058	7.561	17.2414	2.91858	4.1078	Competed and Selective
2	7	MRPS9	0.058	5.679	17.2414	2.50564	4.1078	Competed and Selective
3	11	BYSL	0.058	5.163	17.2414	2.36821	4.1078	Competed and Selective
2	4	PLRG1	0.083	5.681	12.0482	2.50614	3.59074	Non-Specific
28	436	XRCC6	0.058	4.225	17.2414	2.07895	4.1078	Competed and Selective
3	66	RPL27A	0.058	5.068	17.2414	2.34142	4.1078	Competed and Selective
1	3	KIAA2013	0.519	1.086	1.92678	0.119024	0.946194	Non-Specific
1	1	RBM15B	0.112	20.899	8.92857	4.38536	3.15843	Non-Specific
3	10	TMED10	0.058	3.934	17.2414	1.976	4.1078	Competed and Selective
9	45	CAP1	0.058	3.411	17.2414	1.77019	4.1078	Competed and Selective
1	7	BRI3BP	0.092	1.552	10.8696	0.634129	3.44222	Non-Specific
1	2	POLR2E	0.099	6.183	10.101	2.62831	3.33643	Non-Specific
5	28	PPME1	0.058	3.203	17.2414	1.67942	4.1078	Competed and Selective
6	50	OLA1	0.058	3.146	17.2414	1.65352	4.1078	Competed and Selective
2	6	NACA	0.058	2.478	17.2414	1.30918	4.1078	Competed and Selective
2	2	CAMK2D	0.132	6.052	7.57576	2.59741	2.92139	Non-Specific
7	35	CARS	0.058	2.237	17.2414	1.16157	4.1078	Competed and Selective
1	7	FAM3C; WNT16	0.323	1.809	3.09598	0.855192	1.63039	Non-Specific
3	11	NME3	0.058	1.949	17.2414	0.962734	4.1078	Competed and Selective
5	58	CBX3; C15orf57; CCDC32	0.058	1.855	17.2414	0.891419	4.1078	Competed and Selective
3	8	ADAR	0.059	12.406	16.9492	3.63297	4.08314	Competed and Selective
32	104	GCN1L1; GCN1	0.059	7.375	16.9492	2.88264	4.08314	Competed and Selective
20	273	ANXA1	0.059	2.263	16.9492	1.17824	4.08314	Competed and Selective
19	1161	TUBB4A	0.059	4.555	16.9492	2.18745	4.08314	Competed and Selective
7	207	RPS15A	0.059	4.445	16.9492	2.15218	4.08314	Competed and Selective
7	31	MTA2	0.059	4.325	16.9492	2.1127	4.08314	Competed and Selective
26	346	ACTN1	0.059	1.757	16.9492	0.813114	4.08314	Competed and Selective
18	717	TUBB6	0.059	7.463	16.9492	2.89976	4.08314	Competed and Selective
3	18	FAM162A	0.059	3.127	16.9492	1.64478	4.08314	Competed and Selective
10	42	USO1	0.059	2.631	16.9492	1.39561	4.08314	Competed and Selective
2	2	WASF2	0.226	3.245	4.42478	1.69822	2.14561	Non-Specific
1	4	ORMDL2	0.043	30.68	23.2558	4.93923	4.53952	Non-Specific
10	246	PGAM1; LOC643576	0.13	1.393	7.69231	0.478195	2.94342	Selective
2	3	DAK; TKFC	0.109	1.64	9.17431	0.713696	3.1976	Non-Specific
8	34	PSMD14	0.059	2.57	16.9492	1.36177	4.08314	Competed and Selective
1	6	LSM7	0.819	0.625	1.221	-0.678072	0.288065	Non-Specific
4	23	HAT1	0.059	2.405	16.9492	1.26604	4.08314	Competed and Selective
7	41	IDH3A	0.059	2.321	16.9492	1.21475	4.08314	Competed and Selective
3	5	GYS1	0.06	16.191	16.6667	4.01712	4.05889	Competed and Selective
4	8	GNL1	0.06	9.282	16.6667	3.21444	4.05889	Competed and Selective
3	12	ARPC1B	0.06	9.064	16.6667	3.18015	4.05889	Competed and Selective
4	7	MRE11A; MRE11	0.06	6.981	16.6667	2.80343	4.05889	Competed and Selective
3	48	RPS10	0.06	6.295	16.6667	2.65421	4.05889	Competed and Selective
7	73	RPL9	0.06	4.761	16.6667	2.25126	4.05889	Competed and Selective
1	17	LUZP6; MTPN	0.222	1.32	4.5045	0.400538	2.17137	Non-Specific
11	40	CAPN1	0.06	3.654	16.6667	1.86948	4.05889	Competed and Selective
24	276	IPO5	0.06	1.615	16.6667	0.691534	4.05889	Competed and Selective
17	198	TUFM	0.06	5.255	16.6667	2.39369	4.05889	Competed and Selective
11	120	SYNCRIP	0.06	3.051	16.6667	1.60928	4.05889	Competed and Selective
6	24	UMPS	0.06	2.959	16.6667	1.56511	4.05889	Competed and Selective
8	98	ACAT1	0.06	2.885	16.6667	1.52857	4.05889	Competed and Selective
2	14	TMEM30A	0.06	2.481	16.6667	1.31092	4.05889	Competed and Selective
4	24	FUBP1	0.16	1.489	6.25	0.574344	2.64386	Selective
12	24	IDE	0.06	2.031	16.6667	1.02219	4.05889	Competed and Selective
9	43	AKAP12	0.241	0.886	4.14938	-0.174621	2.05289	Selective
12	25	SMC1A	0.061	19.445	16.3934	4.28133	4.03505	Competed and Selective
3	5	AP1M1	0.061	15.464	16.3934	3.95084	4.03505	Competed and Selective
3	7	SUGT1	0.249	1.214	4.01606	0.279768	2.00578	Selective
39	90	SPTAN1	0.061	10.645	16.3934	3.4121	4.03505	Competed and Selective
4	23	TIMM50	0.061	4.295	16.3934	2.10266	4.03505	Competed and Selective
3	3	OPA1	0.129	14.898	7.75194	3.89705	2.95456	Non-Specific
1	1	TCEA1	0.166	3.847	6.0241	1.94373	2.59074	Non-Specific
12	183	ILF2	0.061	3.474	16.3934	1.7966	4.03505	Competed and Selective
4	99	RPL32	0.061	4.145	16.3934	2.05137	4.03505	Competed and Selective
8	24	NAMPT	0.061	3.843	16.3934	1.94223	4.03505	Competed and Selective
11	61	PSMC4	0.061	3.341	16.3934	1.74028	4.03505	Competed and Selective
3	5	USP47	0.061	3.262	16.3934	1.70576	4.03505	Competed and Selective
2	3	PRIM1	0.075	7.328	13.3333	2.87342	3.73697	Non-Specific
2	10	SCAMP1	0.046	1.079	21.7391	0.109695	4.44222	Selective
1	6	KRTCAP2	0.12	2.47	8.33333	1.30451	3.05889	Non-Specific
3	15	CAB39	0.061	2.57	16.3934	1.36177	4.03505	Competed and Selective
1	11	RPS21	0.282	1.638	3.5461	0.711935	1.82623	Non-Specific
12	52	ATP6V1A	0.061	1.914	16.3934	0.936591	4.03505	Competed and Selective
5	31	CLPTM1L	0.061	1.775	16.3934	0.827819	4.03505	Competed and Selective
1	12	PAFAH1B2	0.233	1.982	4.29185	0.986957	2.1016	Non-Specific
2	4	NXN	0.185	1.785	5.40541	0.835924	2.4344	Non-Specific
2	10	UBE2A	1.194	1.601	0.837521	0.678973	-0.255803	Competed
4	9	MYO6	0.062	18.055	16.129	4.17433	4.01159	Competed and Selective
1	13	RAD23B	0.157	1.634	6.36943	0.708408	2.67116	Non-Specific
7	9	SART3	0.062	14.03	16.129	3.81044	4.01159	Competed and Selective
24	371	CCT2	0.062	3.703	16.129	1.88869	4.01159	Competed and Selective
7	27	SRP68	0.062	8.005	16.129	3.0009	4.01159	Competed and Selective
14	41	PYGL	0.062	4.741	16.129	2.24519	4.01159	Competed and Selective
5	155	RPL15	0.062	4.554	16.129	2.18713	4.01159	Competed and Selective
6	58	NASP	0.154	1.143	6.49351	0.192825	2.699	Selective
2	7	RFC2	0.062	3.965	16.129	1.98732	4.01159	Competed and Selective
3	9	DYNC1I2	0.062	3.887	16.129	1.95866	4.01159	Competed and Selective
13	90	PSMD11	0.062	3.783	16.129	1.91953	4.01159	Competed and Selective
3	17	ZC3H15	0.062	3.116	16.129	1.6397	4.01159	Competed and Selective
7	96	MLEC	0.044	1.345	22.7273	0.427606	4.50635	Selective
5	7	KPNA3	0.062	2.868	16.129	1.52005	4.01159	Competed and Selective
5	21	PITRM1	0.062	2.529	16.129	1.33857	4.01159	Competed and Selective
8	72	TPM4	0.231	1.406	4.329	0.491597	2.11404	Selective
17	251	ANXA5	0.107	1.417	9.34579	0.50284	3.22432	Selective
2	18	BSG	0.062	2.216	16.129	1.14796	4.01159	Competed and Selective
11	26	SMC4	0.063	18.366	15.873	4.19897	3.9885	Competed and Selective
2	5	MAPRE2	0.063	12.545	15.873	3.64904	3.9885	Competed and Selective
1	9	CRKL	0.376	1.356	2.65957	0.439357	1.4112	Non-Specific
2	6	DSG2	0.063	11.571	15.873	3.53244	3.9885	Competed and Selective
3	7	SRRM1	0.063	8.426	15.873	3.07485	3.9885	Competed and Selective
11	139	RPL7A	0.063	5.256	15.873	2.39397	3.9885	Competed and Selective
1	4	SUCLG1	0.1	5.13	10	2.35896	3.32193	Non-Specific
6	34	RRM2	0.065	1.428	15.3846	0.513996	3.94342	Selective
19	614	LDHA	0.063	3.146	15.873	1.65352	3.9885	Competed and Selective
2	13	EIF5	0.063	3.12	15.873	1.64155	3.9885	Competed and Selective
1	2	FUNDC1	0.244	2.003	4.09836	1.00216	2.03505	Non-Specific
2	15	DTD1	0.063	2.559	15.873	1.35558	3.9885	Competed and Selective
3	8	FKBP5	0.063	2.515	15.873	1.33056	3.9885	Competed and Selective
2	17	ACP1	0.063	1.832	15.873	0.87342	3.9885	Competed and Selective
2	7	PRKAG1	0.064	12.426	15.625	3.63529	3.96578	Competed and Selective
3	9	CSK	0.064	7.525	15.625	2.91169	3.96578	Competed and Selective
1	1	CDC42BPB	0.286	12.28	3.4965	3.61824	1.80591	Non-Specific
6	21	RNPEP	0.06	1.205	16.6667	0.269033	4.05889	Selective
3	5	SRP54	0.064	5.714	15.625	2.5145	3.96578	Competed and Selective
1	1	CDK7	0.142	9.637	7.04225	3.26858	2.81604	Non-Specific
11	303	RPL6	0.064	5.215	15.625	2.38267	3.96578	Competed and Selective
5	16	PRPSAP2	0.064	4.982	15.625	2.31673	3.96578	Competed and Selective
5	176	RPS8	0.064	4.967	15.625	2.31237	3.96578	Competed and Selective
2	29	RANBP1	0.291	1.279	3.43643	0.355016	1.78091	Selective
4	14	LARP4	0.064	4.951	15.625	2.30772	3.96578	Competed and Selective
1	1	LAMTOR1	0.312	1.641	3.20513	0.714575	1.68038	Non-Specific
4	48	SDHA	0.064	4.784	15.625	2.25822	3.96578	Competed and Selective
3	21	PPP2R2A	0.064	4.493	15.625	2.16768	3.96578	Competed and Selective
1	3	CCDC51	0.099	1.679	10.101	0.747602	3.33643	Non-Specific
3	13	SEC31A	0.064	4.316	15.625	2.10969	3.96578	Competed and Selective
2	53	RPL19	0.064	4.171	15.625	2.06039	3.96578	Competed and Selective
23	200	MTHFD1	0.064	4.17	15.625	2.06005	3.96578	Competed and Selective
1	5	PRRC1	1.224	0.181	0.816993	-2.46594	-0.291604	Non-Specific
4	169	RPS25	0.064	4.098	15.625	2.03492	3.96578	Competed and Selective
8	32	UQCRC2	0.064	4.066	15.625	2.02361	3.96578	Competed and Selective
6	39	ATP5C1	0.064	3.771	15.625	1.91495	3.96578	Competed and Selective
8	25	ME2	0.064	3.706	15.625	1.88986	3.96578	Competed and Selective
6	79	ARHGDIA	0.235	1.255	4.25532	0.327687	2.08927	Selective
4	31	ARL1	0.064	2.377	15.625	1.24914	3.96578	Competed and Selective
5	9	ANXA3	0.064	2.146	15.625	1.10165	3.96578	Competed and Selective
21	41	CHD4	0.065	12.961	15.3846	3.69611	3.94342	Competed and Selective
8	41	MSH2	0.065	6.348	15.3846	2.6663	3.94342	Competed and Selective
1	5	FAM189A2	0.38	0.597	2.63158	-0.744197	1.39593	Non-Specific
2	7	TBCB	0.065	4.795	15.3846	2.26153	3.94342	Competed and Selective
14	54	CUL4B	0.065	4.71	15.3846	2.23573	3.94342	Competed and Selective
8	39	RBM39	0.065	4.685	15.3846	2.22805	3.94342	Competed and Selective
55	918	CLTC	0.065	2.563	15.3846	1.35783	3.94342	Competed and Selective
2	7	NTMT1	0.065	2.902	15.3846	1.53705	3.94342	Competed and Selective
23	295	PDIA3	0.065	1.85	15.3846	0.887525	3.94342	Competed and Selective
2	11	RER1	0.065	2.317	15.3846	1.21226	3.94342	Competed and Selective
4	36	CMBL	0.065	2.251	15.3846	1.17057	3.94342	Competed and Selective
7	16	PDXDC1; LOC102724985	0.065	1.77	15.3846	0.823749	3.94342	Competed and Selective
9	20	AP3D1	0.066	14.229	15.1515	3.83076	3.92139	Competed and Selective
5	9	CNOT1	0.066	13.834	15.1515	3.79015	3.92139	Competed and Selective
12	274	HNRNPA1	0.066	3.78	15.1515	1.91839	3.92139	Competed and Selective
11	55	ASNS	0.066	6.341	15.1515	2.66471	3.92139	Competed and Selective
2	5	GFM1	0.066	5.868	15.1515	2.55287	3.92139	Competed and Selective
10	135	HNRNPL	0.066	5.352	15.1515	2.42008	3.92139	Competed and Selective
5	26	HLA-C	0.066	4.772	15.1515	2.25459	3.92139	Competed and Selective
3	28	RPL36	0.066	4.391	15.1515	2.13455	3.92139	Competed and Selective
2	5	VPS4A	0.066	4.227	15.1515	2.07963	3.92139	Competed and Selective
3	120	HIST1H2BK	0.066	4.225	15.1515	2.07895	3.92139	Competed and Selective
10	385	PRDX1	0.301	1.322	3.32226	0.402722	1.73216	Selective
2	4	AIP	0.076	1.645	13.1579	0.718088	3.71786	Non-Specific
1	1	STRADA	3.518	0.565	0.284252	-0.823677	-1.81476	Non-Specific
14	51	UGGT1	0.188	1.344	5.31915	0.426533	2.4112	Selective
18	36	RANBP2	0.066	4.168	15.1515	2.05936	3.92139	Competed and Selective
21	241	KHSRP	0.141	1.134	7.0922	0.181421	2.82623	Selective
1	2	HDGFRP2; HDGFL2	0.01	17.643	100	4.14102	6.64386	Non-Specific
2	36	CYC1	0.066	3.043	15.1515	1.60549	3.92139	Competed and Selective
4	42	MAGED2	0.066	2.899	15.1515	1.53556	3.92139	Competed and Selective
3	11	PDCD4	0.066	2.737	15.1515	1.4526	3.92139	Competed and Selective
31	500	CSE1L	0.079	1.421	12.6582	0.506907	3.662	Selective
2	4	INTS3	0.104	7.748	9.61538	2.95382	3.26534	Non-Specific
1	2	WDR12	0.043	2.916	23.2558	1.54399	4.53952	Non-Specific
7	32	XPOT	0.066	2.563	15.1515	1.35783	3.92139	Competed and Selective
5	81	COX4I1	0.066	1.885	15.1515	0.914565	3.92139	Competed and Selective
7	237	VDAC2	0.141	1.276	7.0922	0.351628	2.82623	Selective
4	8	NUP98	0.067	6.949	14.9254	2.79681	3.8997	Competed and Selective
2	8	SPCS2	0.067	6.748	14.9254	2.75446	3.8997	Competed and Selective
7	21	EHD1	0.067	6.564	14.9254	2.71458	3.8997	Competed and Selective
1	4	MMGT1	0.048	1.691	20.8333	0.757877	4.38082	Non-Specific
21	375	PABPC1	0.067	2.033	14.9254	1.02361	3.8997	Competed and Selective
8	209	RPL27	0.067	4.659	14.9254	2.22002	3.8997	Competed and Selective
1	3	SAMM50	0.028	2.706	35.7143	1.43616	5.15843	Non-Specific
3	7	NAA50	0.067	4.181	14.9254	2.06385	3.8997	Competed and Selective
4	9	ACADVL	0.435	0.471	2.29885	-1.0862	1.20091	Selective
11	244	SLC25A5	0.067	3.986	14.9254	1.99494	3.8997	Competed and Selective
14	144	TARS	0.067	2.456	14.9254	1.29631	3.8997	Competed and Selective
21	1054	TUBA1B	0.067	3.691	14.9254	1.88401	3.8997	Competed and Selective
3	14	PPP6C	0.067	2.64	14.9254	1.40054	3.8997	Competed and Selective
13	157	PAICS	0.067	2.434	14.9254	1.28333	3.8997	Competed and Selective
4	17	ADPGK	0.067	1.743	14.9254	0.801573	3.8997	Competed and Selective
1	1	NDUFA11	0.12	6.483	8.33333	2.69666	3.05889	Non-Specific
1	3	ABCG4	0.304	9.3	3.28947	3.21723	1.71786	Non-Specific
6	29	DDX50	0.068	18.827	14.7059	4.23473	3.87832	Competed and Selective
2	8	SEH1L	0.068	10.362	14.7059	3.37323	3.87832	Competed and Selective
4	7	ATAD1	0.068	9.414	14.7059	3.23481	3.87832	Competed and Selective
5	10	POLA2	0.068	6.622	14.7059	2.72727	3.87832	Competed and Selective
2	5	CLPP	0.068	6.512	14.7059	2.7031	3.87832	Competed and Selective
1	3	UBE2E3	0.062	2.726	16.129	1.44679	4.01159	Non-Specific
2	8	ABCB7	0.068	6.434	14.7059	2.68572	3.87832	Competed and Selective
6	59	RPL22	0.068	6.099	14.7059	2.60857	3.87832	Competed and Selective
21	284	TRAP1	0.068	3.841	14.7059	1.94148	3.87832	Competed and Selective
21	89	USP9X	0.068	2.673	14.7059	1.41846	3.87832	Competed and Selective
1	1	FMNL3	4.757	0.213	0.210217	-2.23107	-2.25005	Non-Specific
8	39	AIFM1	0.068	2.451	14.7059	1.29337	3.87832	Competed and Selective
8	77	HMGCS1	0.068	2.158	14.7059	1.10969	3.87832	Competed and Selective
3	43	TSN	0.068	1.966	14.7059	0.975263	3.87832	Competed and Selective
6	95	SMS	0.068	1.945	14.7059	0.95977	3.87832	Competed and Selective
10	80	STRAP	0.068	1.699	14.7059	0.764686	3.87832	Competed and Selective
3	9	DYNC1LI1	0.069	11.852	14.4928	3.56706	3.85726	Competed and Selective
5	11	NCLN	0.069	8.794	14.4928	3.13652	3.85726	Competed and Selective
4	5	TWF1	0.069	6.343	14.4928	2.66517	3.85726	Competed and Selective
3	7	NDUFB4	0.069	5.085	14.4928	2.34625	3.85726	Competed and Selective
12	133	CDK1	0.069	3.37	14.4928	1.75275	3.85726	Competed and Selective
1	3	ERGIC2	0.139	3.796	7.19424	1.92448	2.84684	Non-Specific
2	39	ALB	0.195	0.181	5.12821	-2.46594	2.35845	Selective
1	9	SCRN1	0.103	2.586	9.70874	1.37072	3.27928	Non-Specific
14	76	AP2B1	0.069	4.937	14.4928	2.30363	3.85726	Competed and Selective
25	781	EIF4A1	0.069	3.544	14.4928	1.82538	3.85726	Competed and Selective
2	5	ABCF3	0.069	4.192	14.4928	2.06764	3.85726	Competed and Selective
2	48	RPL31	0.069	4.007	14.4928	2.00252	3.85726	Competed and Selective
2	2	LRRC40	0.226	3.85	4.42478	1.94486	2.14561	Non-Specific
5	19	GRWD1	0.069	3.879	14.4928	1.95568	3.85726	Competed and Selective
4	32	NUBP2	0.069	3.409	14.4928	1.76935	3.85726	Competed and Selective
5	18	COBRA1; NELFB	0.069	3.182	14.4928	1.66993	3.85726	Competed and Selective
1	4	LOC100128274	1.044	0.845	0.957854	-0.242977	-0.0621217	Non-Specific
1	1	DCUN1D1	0.162	3.903	6.17284	1.96458	2.62593	Non-Specific
1	5	DENND6A	0.83	1.193	1.20482	0.254594	0.268817	Non-Specific
1	1	PSPH	0.099	3.046	10.101	1.60692	3.33643	Non-Specific
4	14	QSOX2	0.069	3.056	14.4928	1.61164	3.85726	Competed and Selective
1	1	DIMT1	0.063	22.701	15.873	4.50468	3.9885	Non-Specific
3	7	USP10	0.069	2.904	14.4928	1.53804	3.85726	Competed and Selective
6	18	GALNT2	0.069	2.477	14.4928	1.30859	3.85726	Competed and Selective
5	20	XPNPEP1	0.069	1.637	14.4928	0.711054	3.85726	Competed and Selective
9	16	RAD50	0.07	18.975	14.2857	4.24603	3.8365	Competed and Selective
5	6	SUPV3L1	0.07	8.784	14.2857	3.13488	3.8365	Competed and Selective
2	20	NDUFA4	0.07	6.928	14.2857	2.79244	3.8365	Competed and Selective
1	11	S100A11	0.04	2.132	25	1.09221	4.64386	Non-Specific
5	10	ZNF622	0.07	6.324	14.2857	2.66084	3.8365	Competed and Selective
5	9	STAT3	0.323	1.43	3.09598	0.516015	1.63039	Selective
2	9	NCAPG	0.07	3.534	14.2857	1.8213	3.8365	Competed and Selective
1	3	LRRC8E	0.071	3.461	14.0845	1.79119	3.81604	Non-Specific
22	117	ANXA6	0.07	2.751	14.2857	1.45996	3.8365	Competed and Selective
7	27	SEC24C	0.07	2.129	14.2857	1.09018	3.8365	Competed and Selective
4	11	UBA6	0.07	1.898	14.2857	0.92448	3.8365	Competed and Selective
3	18	KPNA4	0.07	1.864	14.2857	0.898402	3.8365	Competed and Selective
2	2	RHEB	0.145	0.994	6.89655	-0.00868224	2.78588	Non-Specific
5	6	RRP1B	0.071	8.973	14.0845	3.16559	3.81604	Competed and Selective
5	13	EMC1	0.071	8.655	14.0845	3.11353	3.81604	Competed and Selective
36	1374	EEF2	0.071	3.538	14.0845	1.82293	3.81604	Competed and Selective
3	3	DNAJC3	0.353	1.172	2.83286	0.228973	1.50226	Non-Specific
2	4	PRKACA	0.163	2.923	6.13497	1.54745	2.61706	Non-Specific
4	15	FAM98B	0.071	3.645	14.0845	1.86592	3.81604	Competed and Selective
5	191	PRDX2	0.423	1.344	2.36407	0.426533	1.24127	Selective
9	88	ACOT7	0.071	3.225	14.0845	1.6893	3.81604	Competed and Selective
1	1	OXLD1	0.061	7.47	16.3934	2.90111	4.03505	Non-Specific
4	51	CPNE1	0.071	2.684	14.0845	1.42438	3.81604	Competed and Selective
3	3	CSDE1	0.117	2.82	8.54701	1.4957	3.09542	Non-Specific
1	10	SF3B4	0.058	2.806	17.2414	1.48852	4.1078	Non-Specific
2	12	DYNLL1	0.071	1.752	14.0845	0.809003	3.81604	Competed and Selective
7	197	ARF5	0.071	1.618	14.0845	0.694212	3.81604	Competed and Selective
1	1	CES1	0.015	5.269	66.6667	2.39753	6.05889	Non-Specific
8	73	RAB11B	0.071	1.531	14.0845	0.614474	3.81604	Competed and Selective
1	2	PTP4A1	0.857	1.229	1.16686	0.297485	0.222633	Non-Specific
3	7	POLR2B	0.072	17.862	13.8889	4.15882	3.79586	Competed and Selective
5	76	RPL38	0.072	7.18	13.8889	2.84398	3.79586	Competed and Selective
4	13	DPYSL2	0.072	5.593	13.8889	2.48362	3.79586	Competed and Selective
16	401	EEF1G	0.072	2.568	13.8889	1.36065	3.79586	Competed and Selective
6	39	ETFA	0.072	2.734	13.8889	1.45101	3.79586	Competed and Selective
7	12	NOP56	0.073	42.469	13.6986	5.40834	3.77596	Competed and Selective
2	5	SMARCC1	0.073	10.742	13.6986	3.42519	3.77596	Competed and Selective
18	300	TRIM28	0.073	1.786	13.6986	0.836732	3.77596	Competed and Selective
1	1	POPDC2	2.926	0.937	0.341763	-0.093879	-1.54893	Non-Specific
1	3	GCNT4	0.79	1.203	1.26582	0.266637	0.340075	Non-Specific
1	1	NT5DC1	0.214	2.68	4.6729	1.42223	2.22432	Non-Specific
5	7	AGPS	0.073	3.708	13.6986	1.89064	3.77596	Competed and Selective
4	10	HNRNPUL2	0.073	3.384	13.6986	1.75873	3.77596	Competed and Selective
6	40	DNAJA1	0.073	2.915	13.6986	1.5435	3.77596	Competed and Selective
2	36	SLC2A1	0.073	2.795	13.6986	1.48285	3.77596	Competed and Selective
8	33	PPM1G	0.073	2.568	13.6986	1.36065	3.77596	Competed and Selective
2	6	EMG1	0.073	2.54	13.6986	1.34483	3.77596	Competed and Selective
5	43	RAB5B	0.073	2.035	13.6986	1.02503	3.77596	Competed and Selective
7	42	GNAS	0.073	1.88	13.6986	0.910733	3.77596	Competed and Selective
5	11	SRPR; SRPRA	0.074	12.59	13.5135	3.65421	3.75633	Competed and Selective
3	9	DCUN1D5	0.074	11.741	13.5135	3.55348	3.75633	Competed and Selective
1	1	PPP1R10	0.09	4.177	11.1111	2.06247	3.47393	Non-Specific
7	126	RPS14	0.074	5.018	13.5135	2.32711	3.75633	Competed and Selective
8	39	TTLL12	0.074	2.793	13.5135	1.48182	3.75633	Competed and Selective
1	13	TMEM41A	0.073	2.07	13.6986	1.04963	3.77596	Non-Specific
2	48	SRP9; SRP9P1	0.406	1.271	2.46305	0.345964	1.30045	Selective
1	1	RET	3.255	0.816	0.30722	-0.293359	-1.70266	Non-Specific
4	20	SEC23IP	0.069	1.168	14.4928	0.22404	3.85726	Selective
10	59	HSPA4L	0.074	2.204	13.5135	1.14012	3.75633	Competed and Selective
18	353	HSPA9	0.249	1.353	4.01606	0.436162	2.00578	Selective
8	52	EIF3M	0.074	2.164	13.5135	1.1137	3.75633	Competed and Selective
10	61	ALDH7A1	0.074	1.764	13.5135	0.818851	3.75633	Competed and Selective
10	16	DIS3	0.075	9.349	13.3333	3.22481	3.73697	Competed and Selective
9	395	NME1	0.389	1.248	2.57069	0.319618	1.36216	Selective
1	3	MRPL19	0.096	2.809	10.4167	1.49006	3.38082	Non-Specific
5	12	TOMM34	0.075	9.179	13.3333	3.19834	3.73697	Competed and Selective
3	8	RBM15	0.075	9.055	13.3333	3.17871	3.73697	Competed and Selective
7	28	U2AF2	0.075	7.688	13.3333	2.94261	3.73697	Competed and Selective
7	18	DDX42	0.075	6.781	13.3333	2.7615	3.73697	Competed and Selective
10	139	ALDH2	0.085	0.91	11.7647	-0.136062	3.55639	Selective
11	43	UBA2	0.075	5.711	13.3333	2.51374	3.73697	Competed and Selective
5	120	MYL6	0.075	5.166	13.3333	2.36905	3.73697	Competed and Selective
24	1243	HSPA8	0.308	1.41	3.24675	0.495695	1.699	Selective
2	2	ADPRHL2	0.606	0.42	1.65017	-1.25154	0.72261	Non-Specific
14	223	TCP1	0.075	3.961	13.3333	1.98586	3.73697	Competed and Selective
14	330	NCL	0.075	3.681	13.3333	1.8801	3.73697	Competed and Selective
6	63	PSMC3	0.075	3.352	13.3333	1.74502	3.73697	Competed and Selective
2	3	MAP1S	0.069	8.304	14.4928	3.05381	3.85726	Non-Specific
2	9	SIGMAR1	0.075	2.333	13.3333	1.22219	3.73697	Competed and Selective
6	78	CDK4	0.075	2.205	13.3333	1.14078	3.73697	Competed and Selective
9	53	CTNNA1	0.075	2.142	13.3333	1.09896	3.73697	Competed and Selective
2	2	DNAJC11	0.167	7.338	5.98802	2.87539	2.58208	Non-Specific
2	8	RPLP2	0.075	1.902	13.3333	0.927517	3.73697	Competed and Selective
2	18	PFDN2	0.42	1.085	2.38095	0.117695	1.25154	Selective
4	6	NUP153	0.076	6.748	13.1579	2.75446	3.71786	Competed and Selective
1	3	FAM213A	0.281	1.803	3.55872	0.850399	1.83136	Non-Specific
3	4	TSR1	0.056	9.668	17.8571	3.27322	4.15843	Non-Specific
1	19	EBP	0.101	1.218	9.90099	0.284514	3.30757	Non-Specific
16	348	GPI	0.076	2.002	13.1579	1.00144	3.71786	Competed and Selective
15	120	OAT	0.076	3.441	13.1579	1.78283	3.71786	Competed and Selective
2	6	GALK1	0.076	2.921	13.1579	1.54646	3.71786	Competed and Selective
9	71	ATXN10	0.076	1.944	13.1579	0.959028	3.71786	Competed and Selective
12	348	VDAC1	0.683	1.085	1.46413	0.117695	0.550043	Non-Specific
6	21	LMNA	0.076	1.809	13.1579	0.855192	3.71786	Competed and Selective
3	8	ADI1	1.439	3.247	0.694927	1.69911	-0.525067	Competed
2	5	SUPT5H	0.077	10.561	12.987	3.40067	3.699	Competed and Selective
2	4	PIGT	0.181	4.787	5.52486	2.25912	2.46594	Non-Specific
4	7	TCERG1	0.077	3.989	12.987	1.99603	3.699	Competed and Selective
19	556	PKM	0.077	3.799	12.987	1.92562	3.699	Competed and Selective
4	30	HLA-B	0.077	3.483	12.987	1.80033	3.699	Competed and Selective
3	82	TXN	0.899	1.392	1.11235	0.477159	0.153607	Non-Specific
20	207	VCL	0.153	1.18	6.53595	0.238787	2.7084	Selective
3	13	UBE2L3	0.363	1.313	2.75482	0.392867	1.46196	Selective
5	31	USP14	0.119	1.362	8.40336	0.445727	3.07097	Selective
2	2	SCFD1	0.126	5.717	7.93651	2.51526	2.9885	Non-Specific
21	244	ATP1A1	0.077	2.21	12.987	1.14405	3.699	Competed and Selective
6	12	PCYOX1	0.233	1.222	4.29185	0.289244	2.1016	Selective
2	8	CPPED1	0.077	2.175	12.987	1.12102	3.699	Competed and Selective
1	2	PURA	0.189	1.628	5.29101	0.703101	2.40354	Non-Specific
2	10	SCO1	0.133	1.121	7.5188	0.164786	2.9105	Selective
2	19	SEC13	0.077	1.826	12.987	0.868687	3.699	Competed and Selective
3	5	CCDC47	0.078	13.003	12.8205	3.70077	3.68038	Competed and Selective
15	166	HNRNPR	0.078	3.564	12.8205	1.8335	3.68038	Competed and Selective
1	1	ANKS1A	0.032	4.627	31.25	2.21008	4.96578	Non-Specific
23	1311	TUBB4B	0.078	3.88	12.8205	1.95606	3.68038	Competed and Selective
22	195	MSN	0.078	2.001	12.8205	1.00072	3.68038	Competed and Selective
6	18	MAP4	0.078	2.417	12.8205	1.27322	3.68038	Competed and Selective
1	2	PDPK1	0.173	3.578	5.78035	1.83915	2.53116	Non-Specific
11	64	SEC16A	0.084	1.339	11.9048	0.421156	3.57347	Selective
13	66	HARS	0.078	2.048	12.8205	1.03422	3.68038	Competed and Selective
4	37	ST13	0.078	1.679	12.8205	0.747602	3.68038	Competed and Selective
2	6	ALDH16A1	0.079	24.908	12.6582	4.63854	3.662	Competed and Selective
10	76	PLIN3	0.033	0.851	30.303	-0.232769	4.92139	Selective
5	9	ILK	0.079	10.553	12.6582	3.39958	3.662	Competed and Selective
25	441	KRT8	0.079	3.129	12.6582	1.6457	3.662	Competed and Selective
5	42	ACTR1A	0.079	4.843	12.6582	2.2759	3.662	Competed and Selective
12	146	HNRNPA3	0.079	4.712	12.6582	2.23634	3.662	Competed and Selective
2	4	MAP4K4	0.174	14.6	5.74713	3.8679	2.52284	Non-Specific
8	181	SLC25A4	0.079	3.989	12.6582	1.99603	3.662	Competed and Selective
3	4	CORO7	0.015	100	66.6667	6.64386	6.05889	Non-Specific
8	147	HNRNPH1	0.079	3.61	12.6582	1.852	3.662	Competed and Selective
2	4	PELP1	0.085	5.108	11.7647	2.35276	3.55639	Non-Specific
19	385	ATP5B	0.079	2.585	12.6582	1.37016	3.662	Competed and Selective
7	42	PUF60	0.079	2.086	12.6582	1.06074	3.662	Competed and Selective
3	58	SEPT7	0.08	3.151	12.5	1.65581	3.64386	Competed and Selective
8	44	FUBP3	0.08	3.063	12.5	1.61495	3.64386	Competed and Selective
1	4	CAMKK1	15.582	0.074	0.0641766	-3.75633	-3.96181	Non-Specific
6	64	SULT1A1	0.08	2.437	12.5	1.28511	3.64386	Competed and Selective
5	118	RAB1A	0.08	1.688	12.5	0.755315	3.64386	Competed and Selective
4	6	EXOC2	0.081	10.066	12.3457	3.33142	3.62593	Competed and Selective
3	6	TBCE	0.081	6.458	12.3457	2.69109	3.62593	Competed and Selective
4	86	RPL26	0.081	5.009	12.3457	2.32452	3.62593	Competed and Selective
14	139	ACOT9	0.081	4.324	12.3457	2.11237	3.62593	Competed and Selective
10	79	G3BP1	0.081	2.852	12.3457	1.51197	3.62593	Competed and Selective
3	7	PMM2	0.081	2.533	12.3457	1.34085	3.62593	Competed and Selective
4	26	PSMB2	0.081	1.988	12.3457	0.991318	3.62593	Competed and Selective
11	64	XPO5	0.081	1.633	12.3457	0.707525	3.62593	Competed and Selective
9	18	EIF5B	0.082	14.268	12.1951	3.83471	3.60823	Competed and Selective
3	6	POLDIP3	0.082	11.201	12.1951	3.48556	3.60823	Competed and Selective
3	9	NDUFA10	0.082	9.369	12.1951	3.2279	3.60823	Competed and Selective
4	5	SEC24B	0.082	5.631	12.1951	2.49339	3.60823	Competed and Selective
10	32	DIAPH1	0.082	4.4	12.1951	2.1375	3.60823	Competed and Selective
10	219	RPLP0	0.082	3.964	12.1951	1.98696	3.60823	Competed and Selective
5	54	BUB3	0.082	3.802	12.1951	1.92676	3.60823	Competed and Selective
4	11	OXCT1	0.082	3.497	12.1951	1.80612	3.60823	Competed and Selective
9	61	EIF3F	0.082	2.597	12.1951	1.37685	3.60823	Competed and Selective
2	7	SF3A2	0.083	9.328	12.0482	3.22157	3.59074	Competed and Selective
5	34	CAPRIN1	0.083	6.608	12.0482	2.72421	3.59074	Competed and Selective
7	65	HDAC2	0.083	2.45	12.0482	1.29278	3.59074	Competed and Selective
2	8	YTHDF2	0.083	2.174	12.0482	1.12035	3.59074	Competed and Selective
2	8	SKP1	0.083	2.077	12.0482	1.0545	3.59074	Competed and Selective
14	44	TPR	0.265	1.326	3.77358	0.407081	1.91594	Selective
3	3	DTYMK	0.109	2.883	9.17431	1.52757	3.1976	Non-Specific
2	9	ECHS1	0.083	1.755	12.0482	0.811471	3.59074	Competed and Selective
1	4	MRPS35	0.101	5.078	9.90099	2.34426	3.30757	Non-Specific
4	29	ERP44	0.176	1.156	5.68182	0.209141	2.50635	Selective
4	100	COX2	0.083	1.707	12.0482	0.771463	3.59074	Competed and Selective
2	3	ACIN1	0.068	9.731	14.7059	3.28259	3.87832	Non-Specific
17	258	CCT8	0.084	2.147	11.9048	1.10232	3.57347	Competed and Selective
22	467	KPNB1	0.084	1.846	11.9048	0.884403	3.57347	Competed and Selective
2	7	HSDL2	0.084	3.337	11.9048	1.73855	3.57347	Competed and Selective
8	28	NUP210	0.084	2.086	11.9048	1.06074	3.57347	Competed and Selective
12	96	APMAP	0.108	1.33	9.25926	0.411426	3.2109	Selective
2	2	ERBB2IP; ERBIN	0.2	1.705	5	0.769772	2.32193	Non-Specific
7	14	NUP160	0.085	6.014	11.7647	2.58832	3.55639	Competed and Selective
3	6	LTV1	0.085	4.897	11.7647	2.2919	3.55639	Competed and Selective
3	15	RAB18	0.121	1.05	8.26446	0.0703893	3.04692	Selective
5	13	NDUFV1	0.085	3.842	11.7647	1.94186	3.55639	Competed and Selective
14	100	HSD17B4	0.085	2.059	11.7647	1.04194	3.55639	Competed and Selective
3	9	PEPD	0.085	1.861	11.7647	0.896078	3.55639	Competed and Selective
2	3	DNAJC9	0.073	2.861	13.6986	1.51652	3.77596	Non-Specific
1	2	GMDS	1.635	0.855	0.611621	-0.226004	-0.709291	Non-Specific
5	52	PRDX3	0.085	1.713	11.7647	0.776525	3.55639	Competed and Selective
6	29	BAG6	0.085	1.521	11.7647	0.60502	3.55639	Competed and Selective
4	32	CNDP2	0.149	1.206	6.71141	0.27023	2.74662	Selective
4	20	ACAD9	0.086	5.096	11.6279	2.34937	3.53952	Competed and Selective
14	413	AHCY	0.086	2.655	11.6279	1.40871	3.53952	Competed and Selective
2	6	GNS	0.292	1.284	3.42466	0.360645	1.77596	Selective
2	7	PFDN5	0.788	0.48	1.26904	-1.05889	0.343732	Non-Specific
5	11	SF3A3	0.086	2.703	11.6279	1.43456	3.53952	Competed and Selective
3	23	VPS29	0.086	2.402	11.6279	1.26424	3.53952	Competed and Selective
5	75	ESD	0.086	2.302	11.6279	1.20289	3.53952	Competed and Selective
2	4	ECI1	0.049	1.457	20.4082	0.543001	4.35107	Non-Specific
1	3	C17orf75	0.439	2.322	2.2779	1.21537	1.18771	Non-Specific
3	4	EXOSC10	0.154	10.603	6.49351	3.4064	2.699	Non-Specific
3	24	MAGOHB	0.086	1.61	11.6279	0.687061	3.53952	Competed and Selective
2	19	TXNDC17	0.676	1.964	1.47929	0.973795	0.564905	Competed
5	11	EPB41L3	0.087	6.122	11.4943	2.614	3.52284	Competed and Selective
26	388	HNRNPM	0.087	4.32	11.4943	2.11103	3.52284	Competed and Selective
24	274	HSPA4	0.159	1.442	6.28931	0.528071	2.6529	Selective
5	11	EXOSC2	0.087	4.327	11.4943	2.11337	3.52284	Competed and Selective
3	25	FDPS	0.087	2.77	11.4943	1.46989	3.52284	Competed and Selective
6	19	DNAJC7	0.087	2.56	11.4943	1.35614	3.52284	Competed and Selective
1	5	SCD5	0.097	4.07	10.3093	2.02503	3.36587	Non-Specific
10	116	PHGDH	0.087	2.232	11.4943	1.15834	3.52284	Competed and Selective
2	2	ACADSB	1.082	0.89	0.924214	-0.168123	-0.1137	Non-Specific
7	46	SF3A1	0.126	1.464	7.93651	0.549916	2.9885	Selective
4	8	IPO8	0.088	5.283	11.3636	2.40136	3.50635	Competed and Selective
14	81	C22orf28; RTCB	0.088	4.217	11.3636	2.07622	3.50635	Competed and Selective
4	118	RPL11	0.088	3.68	11.3636	1.87971	3.50635	Competed and Selective
1	1	AQP7P3	0.571	0.816	1.75131	-0.293359	0.808437	Non-Specific
14	188	FSCN1	0.088	3.339	11.3636	1.73942	3.50635	Competed and Selective
8	125	PRDX5	0.533	1.246	1.87617	0.317304	0.907793	Selective
7	23	SRRT	0.088	3.377	11.3636	1.75574	3.50635	Competed and Selective
2	4	CASP3	0.071	2.474	14.0845	1.30685	3.81604	Non-Specific
4	13	STK25	0.088	2.837	11.3636	1.50437	3.50635	Competed and Selective
5	67	UQCRC1	0.088	2.471	11.3636	1.3051	3.50635	Competed and Selective
7	85	VDAC3	0.088	2.443	11.3636	1.28865	3.50635	Competed and Selective
4	16	CLNS1A	0.088	1.969	11.3636	0.977463	3.50635	Competed and Selective
8	39	PDCD6IP	0.088	1.823	11.3636	0.866315	3.50635	Competed and Selective
5	9	CUL1	0.089	7.703	11.236	2.94542	3.49005	Competed and Selective
8	115	HSD17B10	0.089	2.533	11.236	1.34085	3.49005	Competed and Selective
3	3	MCU	0.143	5.507	6.99301	2.46127	2.80591	Non-Specific
12	90	USP5	0.143	1.001	6.99301	0.00144197	2.80591	Selective
6	15	ARHGAP1	0.089	2.038	11.236	1.02715	3.49005	Competed and Selective
5	23	FAM49B	0.089	1.799	11.236	0.847195	3.49005	Competed and Selective
3	15	FBXO22	0.158	1.459	6.32911	0.54498	2.662	Selective
1	1	NUP37	0.06	3.253	16.6667	1.70177	4.05889	Non-Specific
1	3	RPF2	0.261	2.22	3.83142	1.15056	1.93788	Non-Specific
5	32	PSMD7	0.089	1.689	11.236	0.756169	3.49005	Competed and Selective
2	4	DDX20	0.072	16.887	13.8889	4.07784	3.79586	Non-Specific
5	14	ACBD3	0.089	1.654	11.236	0.725959	3.49005	Competed and Selective
5	20	CAPNS1	0.089	1.644	11.236	0.71721	3.49005	Competed and Selective
3	7	NTPCR	0.09	14.082	11.1111	3.81578	3.47393	Competed and Selective
1	26	LOC100130932; SNRPGP15	0.624	1.225	1.60256	0.292782	0.680382	Non-Specific
3	17	RBM8A; LOC101060541	0.509	1.23	1.96464	0.298658	0.974262	Selective
1	3	TTYH3	4.285	0.258	0.233372	-1.95456	-2.0993	Non-Specific
2	8	CLU	0.09	12.094	11.1111	3.59622	3.47393	Competed and Selective
3	17	PIN4	0.09	7.804	11.1111	2.96421	3.47393	Competed and Selective
16	291	PTBP1	0.09	3.123	11.1111	1.64293	3.47393	Competed and Selective
2	11	COPS5	0.099	1.364	10.101	0.447844	3.33643	Selective
3	14	WDR5	0.09	4.489	11.1111	2.16639	3.47393	Competed and Selective
33	828	UBA1	0.15	1.444	6.66667	0.530071	2.73697	Selective
9	196	YWHAQ	0.09	2.951	11.1111	1.5612	3.47393	Competed and Selective
2	7	NRBP1	0.09	2.676	11.1111	1.42008	3.47393	Competed and Selective
5	91	HNRNPC	0.09	2.312	11.1111	1.20914	3.47393	Competed and Selective
20	53	HUWE1	0.09	2.146	11.1111	1.10165	3.47393	Competed and Selective
1	2	B3GAT3	0.135	3.388	7.40741	1.76043	2.88897	Non-Specific
2	4	ANKLE2	0.068	4.321	14.7059	2.11137	3.87832	Non-Specific
2	11	OCIAD2	0.09	2.027	11.1111	1.01935	3.47393	Competed and Selective
4	9	RAVER1	0.091	14.406	10.989	3.8486	3.45799	Competed and Selective
3	8	THOC2	0.091	8.418	10.989	3.07348	3.45799	Competed and Selective
35	719	ACTN4	0.091	1.597	10.989	0.675364	3.45799	Competed and Selective
2	5	LYPLA2	0.091	3.791	10.989	1.92258	3.45799	Competed and Selective
2	13	PSMG1	0.091	3.569	10.989	1.83552	3.45799	Competed and Selective
1	3	LANCL1	0.035	14.51	28.5714	3.85898	4.8365	Non-Specific
2	17	COX6C	0.091	2.928	10.989	1.54992	3.45799	Competed and Selective
2	5	PARN	0.091	2.724	10.989	1.44573	3.45799	Competed and Selective
5	34	GSR	0.091	1.74	10.989	0.799087	3.45799	Competed and Selective
1	2	BTF3	0.185	1.468	5.40541	0.553852	2.4344	Non-Specific
5	9	DDX18	0.092	10.192	10.8696	3.34937	3.44222	Competed and Selective
1	9	PRODH	0.217	1.829	4.60829	0.871055	2.20423	Non-Specific
1	2	MRPS5	0.137	7.18	7.29927	2.84398	2.86775	Non-Specific
14	172	GDI2	0.092	2.025	10.8696	1.01792	3.44222	Competed and Selective
3	3	LIG1	0.172	3.566	5.81395	1.83431	2.53952	Non-Specific
3	8	NSDHL	0.092	2.588	10.8696	1.37184	3.44222	Competed and Selective
1	2	PHF6	0.07	7.195	14.2857	2.84699	3.8365	Non-Specific
2	4	ACADM	0.531	3.812	1.88324	1.93055	0.913216	Non-Specific
13	181	PRDX6	0.277	1.441	3.61011	0.52707	1.85204	Selective
1	3	PSMG2	0.048	2.332	20.8333	1.22157	4.38082	Non-Specific
1	1	NCSTN	0.113	1.365	8.84956	0.448901	3.14561	Non-Specific
20	1014	TUBB2A	0.092	5.697	10.8696	2.5102	3.44222	Competed and Selective
4	12	TUBG1	0.093	7.644	10.7527	2.93433	3.42663	Competed and Selective
1	6	ATP6V0C	0.184	1.747	5.43478	0.80488	2.44222	Non-Specific
1	1	SH3GLB2	0.243	2.822	4.11523	1.49672	2.04097	Non-Specific
2	2	NLE1	0.112	9.21	8.92857	3.2032	3.15843	Non-Specific
16	188	CCT5	0.093	3.137	10.7527	1.64939	3.42663	Competed and Selective
1	1	TLR1	0.263	0.664	3.80228	-0.590745	1.92687	Non-Specific
2	2	UFL1	0.066	8.572	15.1515	3.09963	3.92139	Non-Specific
6	14	UNC45A	0.093	5.512	10.7527	2.46258	3.42663	Competed and Selective
4	15	PDHB	0.093	3.994	10.7527	1.99783	3.42663	Competed and Selective
4	41	VBP1	0.388	0.929	2.57732	-0.106249	1.36587	Selective
1	3	MOCS2	0.769	0.488	1.30039	-1.03505	0.378944	Non-Specific
3	40	EIF3G	0.093	3.124	10.7527	1.64339	3.42663	Competed and Selective
11	297	CKB	0.409	1.278	2.44499	0.353888	1.28983	Selective
5	20	ACTL6A	0.093	2.044	10.7527	1.0314	3.42663	Competed and Selective
10	108	DDOST	0.093	1.99	10.7527	0.992768	3.42663	Competed and Selective
3	19	STT3B	0.094	20.097	10.6383	4.32891	3.4112	Competed and Selective
3	6	GCDH	0.094	9.481	10.6383	3.24504	3.4112	Competed and Selective
5	30	ATAD3A	0.094	7.708	10.6383	2.94636	3.4112	Competed and Selective
21	369	SLC3A2	0.078	1.383	12.8205	0.467801	3.68038	Selective
8	94		0.094	2.781	10.6383	1.4756	3.4112	Non-Specific
5	30	HADH	0.163	1.48	6.13497	0.565597	2.61706	Selective
6	94	HNRNPAB	0.094	2.77	10.6383	1.46989	3.4112	Competed and Selective
4	26	CYCS	0.094	2.619	10.6383	1.38902	3.4112	Competed and Selective
3	6	APOO	0.525	0.852	1.90476	-0.231075	0.929611	Selective
4	6	PES1	0.095	10.561	10.5263	3.40067	3.39593	Competed and Selective
4	9	CSNK2A2	0.095	6.231	10.5263	2.63946	3.39593	Competed and Selective
6	16	COLGALT1; GLT25D1	0.095	3.987	10.5263	1.9953	3.39593	Competed and Selective
8	77	NAP1L4	0.095	1.679	10.5263	0.747602	3.39593	Competed and Selective
1	2	RPL22L1	0.036	54.071	27.7778	5.75678	4.79586	Non-Specific
4	7	CNP	0.096	13.853	10.4167	3.79213	3.38082	Competed and Selective
1	4	RNASEH2A	0.067	24.355	14.9254	4.60615	3.8997	Non-Specific
3	5	SMARCA4	0.096	9.691	10.4167	3.27665	3.38082	Competed and Selective
1	2	STUB1	0.144	1.745	6.94444	0.803227	2.79586	Non-Specific
3	12	HECTD1	0.096	3.133	10.4167	1.64754	3.38082	Competed and Selective
6	11	WDR77	0.096	2.776	10.4167	1.47301	3.38082	Competed and Selective
5	50	YBX1	0.096	2.445	10.4167	1.28983	3.38082	Competed and Selective
5	36	FTL	0.855	1.765	1.16959	0.819668	0.226004	Competed
2	2	TOR1A	0.096	7.272	10.4167	2.86235	3.38082	Non-Specific
5	27	DECR1	0.096	2.259	10.4167	1.17568	3.38082	Competed and Selective
4	24	MRPS34	0.097	3.599	10.3093	1.8476	3.36587	Competed and Selective
7	13	TPP2	0.097	3.39	10.3093	1.76129	3.36587	Competed and Selective
11	314	GNB2L1; RACK1	0.097	3.205	10.3093	1.68032	3.36587	Competed and Selective
1	1	STOM	0.391	0.45	2.55754	-1.152	1.35476	Non-Specific
3	5	CTBP2	0.097	3.009	10.3093	1.58928	3.36587	Competed and Selective
1	1	AFF4	0.944	4.599	1.05932	2.20132	0.0831412	Non-Specific
16	208	FKBP4	0.198	1.371	5.05051	0.455229	2.33643	Selective
2	6	TMEM214	0.097	2.151	10.3093	1.10501	3.36587	Competed and Selective
2	3	EBNA1BP2	0.055	47.621	18.1818	5.57353	4.18442	Non-Specific
12	261	YWHAZ	0.264	1.477	3.78788	0.56267	1.92139	Selective
4	18	SAR1A	0.097	2.149	10.3093	1.10367	3.36587	Competed and Selective
2	16	HBA2; HBA1	0.048	0.612	20.8333	-0.708396	4.38082	Selective
4	53	SLC1A5	0.097	1.684	10.3093	0.751892	3.36587	Competed and Selective
1	2	BRE; BABAM2	0.196	3.49	5.10204	1.80323	2.35107	Non-Specific
9	259	ARF3	0.097	1.671	10.3093	0.740712	3.36587	Competed and Selective
3	23	TM9SF2	0.07	1.499	14.2857	0.584	3.8365	Selective
3	66	BCAP31	0.043	1.094	23.2558	0.129613	4.53952	Selective
1	1	ATRX	0.246	9.422	4.06504	3.23603	2.02327	Non-Specific
4	6	OGDH	0.098	6.631	10.2041	2.72923	3.35107	Competed and Selective
3	14	PRCP	0.098	6.426	10.2041	2.68392	3.35107	Competed and Selective
2	2	ERLIN2	0.033	3.872	30.303	1.95308	4.92139	Non-Specific
7	62	SLC2A3	0.133	0.914	7.5188	-0.129734	2.9105	Selective
1	1	TBC1D24	0.224	3.826	4.46429	1.93584	2.15843	Non-Specific
2	6	DHX16	0.098	5.901	10.2041	2.56096	3.35107	Competed and Selective
1	1	LNPEP	0.33	1.85	3.0303	0.887525	1.59946	Non-Specific
3	47	RPS27	0.098	5.624	10.2041	2.4916	3.35107	Competed and Selective
4	32	SNRPD2	0.098	5.157	10.2041	2.36653	3.35107	Competed and Selective
6	10	SEC24A	0.098	5.085	10.2041	2.34625	3.35107	Competed and Selective
8	49	GSPT1	0.098	4.643	10.2041	2.21506	3.35107	Competed and Selective
1	1	ABCC1	1.012	0.615	0.988142	-0.701342	-0.0172093	Non-Specific
15	380	RPS3	0.098	3.325	10.2041	1.73335	3.35107	Competed and Selective
6	34	DHRS2	0.098	3.107	10.2041	1.63552	3.35107	Competed and Selective
16	110	NPEPPS	0.098	1.782	10.2041	0.833497	3.35107	Competed and Selective
1	2	TNRC6B	0.865	0.894	1.15607	-0.161653	0.209228	Non-Specific
9	37	SNX2	0.148	1.147	6.75676	0.197865	2.75633	Selective
29	691	PLS3	0.149	1.476	6.71141	0.561693	2.74662	Selective
4	46	PSMA2	0.098	1.977	10.2041	0.983313	3.35107	Competed and Selective
3	17	VAMP3	0.227	1.308	4.40529	0.387363	2.13924	Selective
2	7	ADNP	0.099	8.853	10.101	3.14617	3.33643	Competed and Selective
2	6	NDUFB10	0.141	1.085	7.0922	0.117695	2.82623	Selective
2	2	OGT	0.062	16.108	16.129	4.00971	4.01159	Non-Specific
4	6	MAT2B	0.099	8.004	10.101	3.00072	3.33643	Competed and Selective
17	236	ATIC	0.099	3.449	10.101	1.78618	3.33643	Competed and Selective
2	3	ABI1	0.121	10.635	8.26446	3.41075	3.04692	Non-Specific
4	29	STOML2	0.099	2.062	10.101	1.04404	3.33643	Competed and Selective
1	2	SERPINB1	0.672	0.266	1.4881	-1.9105	0.573467	Non-Specific
3	13	STRBP	0.1	10.826	10	3.43643	3.32193	Competed and Selective
1	10	IL16	0.95	0.25	1.05263	-2	0.0740006	Non-Specific
2	5	SGTA	0.328	1.018	3.04878	0.0257376	1.60823	Selective
3	5	YME1L1	0.1	7.36	10	2.87971	3.32193	Competed and Selective
2	8	PRAF2	0.098	1.335	10.2041	0.41684	3.35107	Selective
14	81	EZR	0.1	2.166	10	1.11503	3.32193	Competed and Selective
3	83	PCBP1	0.247	1.321	4.04858	0.40163	2.01742	Selective
4	15	SORD	0.1	2.079	10	1.05589	3.32193	Competed and Selective
9	57	CTTN	0.084	1.084	11.9048	0.116365	3.57347	Selective
2	5	AK2	0.1	1.92	10	0.941106	3.32193	Competed and Selective
6	6	DHX30	0.101	16.596	9.90099	4.05276	3.30757	Competed and Selective
1	1	NHLRC2	0.127	1.915	7.87402	0.937344	2.9771	Non-Specific
3	7	PPP5C	0.101	6.199	9.90099	2.63204	3.30757	Competed and Selective
2	5	SART1	0.101	5.863	9.90099	2.55164	3.30757	Competed and Selective
1	1	EHMT2	0.377	4.683	2.65252	2.22743	1.40736	Non-Specific
1	1	HMGA2	0.072	6.565	13.8889	2.7148	3.79586	Non-Specific
18	161	HSPH1	0.101	1.997	9.90099	0.997834	3.30757	Competed and Selective
3	6	RBM12	0.309	1.241	3.23625	0.311503	1.69432	Selective
3	21	PAIP1	0.101	2.308	9.90099	1.20664	3.30757	Competed and Selective
6	36	AHSA1	0.101	2.288	9.90099	1.19409	3.30757	Competed and Selective
8	28	COPS2	0.101	2.109	9.90099	1.07656	3.30757	Competed and Selective
8	136	ACTBL2	0.101	2.061	9.90099	1.04334	3.30757	Competed and Selective
8	38	EPHX1	0.058	1.408	17.2414	0.493647	4.1078	Selective
7	64	HPRT1	0.101	1.813	9.90099	0.858379	3.30757	Competed and Selective
13	19	UBR4	0.102	8.097	9.80392	3.01739	3.29336	Competed and Selective
2	20	SRSF10; LOC100996657	0.102	3.852	9.80392	1.94561	3.29336	Competed and Selective
14	40	GOLGB1	0.102	2.368	9.80392	1.24367	3.29336	Competed and Selective
6	25	ATP6V1B2	0.102	1.869	9.80392	0.902267	3.29336	Competed and Selective
3	11	PCMT1	0.102	1.678	9.80392	0.746743	3.29336	Competed and Selective
8	56	RAB2A	0.094	1.317	10.6383	0.397255	3.4112	Selective
2	16	PDCD6	0.102	1.501	9.80392	0.585924	3.29336	Competed and Selective
3	7	NT5C2	0.103	7.911	9.70874	2.98386	3.27928	Competed and Selective
2	6	PRKAR2A	0.103	3.445	9.70874	1.7845	3.27928	Competed and Selective
6	54	MDH1	0.103	2.757	9.70874	1.4631	3.27928	Competed and Selective
1	2	TBL2	0.021	25.873	47.619	4.69338	5.57347	Non-Specific
1	4	MEN1	6.731	0.075	0.148566	-3.73697	-2.75082	Non-Specific
2	2	USP11	0.172	2.973	5.81395	1.57192	2.53952	Non-Specific
1	1	MKI67IP; NIFK	0.227	10.272	4.40529	3.36065	2.13924	Non-Specific
3	6	PICALM	0.103	1.755	9.70874	0.811471	3.27928	Competed and Selective
1	1	SBDS	0.103	11.319	9.70874	3.50067	3.27928	Non-Specific
5	49	LMAN2	0.14	1.478	7.14286	0.563646	2.8365	Selective
4	4	VAV2	0.092	19.514	10.8696	4.28644	3.44222	Non-Specific
8	14	SMC3	0.104	10.542	9.61538	3.39808	3.26534	Competed and Selective
2	5	DHRS7B	0.104	9.805	9.61538	3.29352	3.26534	Competed and Selective
4	14	CSNK1A1	0.104	8.111	9.61538	3.01988	3.26534	Competed and Selective
2	8	AKR7A2	0.104	4.951	9.61538	2.30772	3.26534	Competed and Selective
1	6	MRPL50	0.094	1.693	10.6383	0.759582	3.4112	Non-Specific
2	33	MCTS1	0.104	3.458	9.61538	1.78994	3.26534	Competed and Selective
1	12	TK1	0.107	3.254	9.34579	1.70221	3.22432	Non-Specific
5	6	NDUFS1	0.104	3.374	9.61538	1.75446	3.26534	Competed and Selective
5	5	CTNNBL1	0.104	3.366	9.61538	1.75104	3.26534	Competed and Selective
8	73	GLRX3	0.104	1.728	9.61538	0.789103	3.26534	Competed and Selective
2	19	TM9SF4	0.104	1.591	9.61538	0.669934	3.26534	Competed and Selective
3	91	RAB10	0.104	1.543	9.61538	0.625738	3.26534	Competed and Selective
2	6	GOSR2	0.105	4.528	9.52381	2.17887	3.25154	Competed and Selective
5	34	SRSF9	0.105	3.209	9.52381	1.68212	3.25154	Competed and Selective
6	70	RAB5C	0.105	1.708	9.52381	0.772308	3.25154	Competed and Selective
4	43	HNRNPA0	0.106	3.695	9.43396	1.88557	3.23786	Competed and Selective
3	5	SGPL1	0.106	3.584	9.43396	1.84157	3.23786	Competed and Selective
2	5	CPSF2	0.106	1.911	9.43396	0.934328	3.23786	Competed and Selective
8	47	PNP	0.106	1.534	9.43396	0.617298	3.23786	Competed and Selective
4	10	FAM98A	0.107	7.752	9.34579	2.95457	3.22432	Competed and Selective
4	8	MAPK3	0.107	7.422	9.34579	2.89181	3.22432	Competed and Selective
4	32	PSMA4	0.107	2.38	9.34579	1.25096	3.22432	Competed and Selective
10	65	SARS	0.107	2.035	9.34579	1.02503	3.22432	Competed and Selective
3	13	BLMH	0.107	1.831	9.34579	0.872632	3.22432	Competed and Selective
1	4	BANF1	0.092	5.365	10.8696	2.42358	3.44222	Non-Specific
5	8	GAPVD1	0.108	12.282	9.25926	3.61847	3.2109	Competed and Selective
13	360	HNRNPK	0.108	2.842	9.25926	1.50691	3.2109	Competed and Selective
1	1	UBE2S	0.07	24.32	14.2857	4.60407	3.8365	Non-Specific
1	3	EI24	0.117	3.052	8.54701	1.60975	3.09542	Non-Specific
1	1	C6orf211; ARMT1	0.16	2.794	6.25	1.48233	2.64386	Non-Specific
3	14	SNRNP40	0.108	4.844	9.25926	2.2762	3.2109	Competed and Selective
6	109	RAB6A	0.108	1.863	9.25926	0.897628	3.2109	Competed and Selective
4	13	XPO7	0.108	1.785	9.25926	0.835924	3.2109	Competed and Selective
2	11	NAPA	0.108	1.741	9.25926	0.799916	3.2109	Competed and Selective
2	5	PNPT1	0.108	1.734	9.25926	0.794104	3.2109	Competed and Selective
8	238	RAB1B	0.108	1.712	9.25926	0.775683	3.2109	Competed and Selective
10	141	CALR	0.144	1.001	6.94444	0.00144197	2.79586	Selective
1	4	AP1S1	0.049	21.139	20.4082	4.40184	4.35107	Non-Specific
2	53	SNRPD3	0.109	3.522	9.17431	1.81639	3.1976	Competed and Selective
15	468	LDHB	0.109	2.053	9.17431	1.03773	3.1976	Competed and Selective
37	1809	HSP90AB1	0.11	1.89	9.09091	0.918386	3.18442	Competed and Selective
4	22	IDH2	0.11	4.429	9.09091	2.14698	3.18442	Competed and Selective
6	18	C12orf10	0.11	1.756	9.09091	0.812293	3.18442	Competed and Selective
15	260	HNRNPA2B1	0.111	3.244	9.00901	1.69777	3.17137	Competed and Selective
6	26	NAA10	0.111	4.098	9.00901	2.03492	3.17137	Competed and Selective
5	29	RPA1	0.111	4.071	9.00901	2.02538	3.17137	Competed and Selective
4	10	PRPF31	0.112	19.282	8.92857	4.26918	3.15843	Competed and Selective
11	56	SEPT9	0.112	7.152	8.92857	2.83835	3.15843	Competed and Selective
10	72	KRT17	0.113	11.214	8.84956	3.48723	3.14561	Competed and Selective
8	117	NONO	0.113	2.949	8.84956	1.56023	3.14561	Competed and Selective
1	3	TIMP1	0.12	19.133	8.33333	4.25799	3.05889	Non-Specific
18	352	TKT	0.191	1.101	5.2356	0.138814	2.38836	Selective
2	10	AKR1A1	0.113	2.093	8.84956	1.06557	3.14561	Competed and Selective
2	4	NDUFV2	0.636	1.185	1.57233	0.244887	0.652901	Non-Specific
4	7	ABHD10	0.114	2.83	8.77193	1.5008	3.13289	Competed and Selective
4	41	TXNDC5	0.146	1.164	6.84932	0.219091	2.77596	Selective
1	1	WDR33	0.185	5.38	5.40541	2.42761	2.4344	Non-Specific
3	60	RPS20	0.114	2.819	8.77193	1.49518	3.13289	Competed and Selective
2	15	NDUFA13	0.114	2.347	8.77193	1.23082	3.13289	Competed and Selective
2	6	NDRG3	0.114	1.504	8.77193	0.588805	3.13289	Competed and Selective
1	2	SSR3	0.029	35.161	34.4828	5.1359	5.1078	Non-Specific
1	1	NCAPH	0.307	2.601	3.25733	1.37907	1.70369	Non-Specific
2	5	PSIP1	0.115	6.621	8.69565	2.72705	3.12029	Competed and Selective
1	2	SNW1	0.25	2.145	4	1.10098	2	Non-Specific
2	5	NCOA5	0.115	5.77	8.69565	2.52857	3.12029	Competed and Selective
1	5	IRF2BP1	9.903	0.118	0.10098	-3.08314	-3.30787	Non-Specific
4	13	PDLIM5	0.116	4.343	8.62069	2.11869	3.1078	Competed and Selective
7	163	RPS18	0.116	3.548	8.62069	1.82701	3.1078	Competed and Selective
7	96	OTUB1	0.116	2.061	8.62069	1.04334	3.1078	Competed and Selective
4	14	HEATR2; DNAAF5	0.117	5.365	8.54701	2.42358	3.09542	Competed and Selective
3	18	PDHA1	0.117	2.28	8.54701	1.18903	3.09542	Competed and Selective
10	117	PDIA6	0.117	1.515	8.54701	0.599318	3.09542	Competed and Selective
2	4	MRPL22	0.116	3.479	8.62069	1.79867	3.1078	Non-Specific
1	5	PPIH	0.094	1.707	10.6383	0.771463	3.4112	Non-Specific
3	26	VAPB	0.054	1.484	18.5185	0.569491	4.2109	Selective
4	32	PSME2	0.076	1.068	13.1579	0.0949116	3.71786	Selective
4	30	COPG2	0.118	9.356	8.47458	3.22589	3.08314	Competed and Selective
5	26	GLS	0.118	2.9	8.47458	1.53605	3.08314	Competed and Selective
8	86	RBBP7	0.118	2.332	8.47458	1.22157	3.08314	Competed and Selective
4	6	LONP1	0.119	3.986	8.40336	1.99494	3.07097	Competed and Selective
1	27	HINT1	0.523	1.698	1.91205	0.763836	0.935117	Non-Specific
6	101	PARK7	0.227	0.972	4.40529	-0.0409718	2.13924	Selective
5	24	TXNL1	0.12	2.928	8.33333	1.54992	3.05889	Competed and Selective
2	8	ARPC3	0.12	2.296	8.33333	1.19912	3.05889	Competed and Selective
1	2	ITGAV	0.285	0.999	3.50877	-0.00144342	1.81097	Non-Specific
2	24	CSRP1	0.12	1.629	8.33333	0.703987	3.05889	Competed and Selective
4	23	SUB1	0.162	1.248	6.17284	0.319618	2.62593	Selective
4	4	SNX5	0.204	1.409	4.90196	0.494672	2.29336	Non-Specific
2	9	LAMP1	0.069	1.111	14.4928	0.151859	3.85726	Selective
2	6	FAHD1	0.121	2.365	8.26446	1.24184	3.04692	Competed and Selective
7	63	TPM3	0.389	0.903	2.57069	-0.147202	1.36216	Selective
3	98	RPS27A	0.122	2.607	8.19672	1.38239	3.03505	Competed and Selective
1	4	TOR1AIP2	0.076	1.846	13.1579	0.884403	3.71786	Non-Specific
13	91	RUVBL2	0.122	2.544	8.19672	1.3471	3.03505	Competed and Selective
5	39	ZMPSTE24	0.071	1.402	14.0845	0.487486	3.81604	Selective
8	93	TOMM40	0.122	2.31	8.19672	1.20789	3.03505	Competed and Selective
1	4	DPM3	0.469	2.264	2.1322	1.17887	1.09234	Non-Specific
3	6	HDGF	2.038	0.113	0.490677	-3.14561	-1.02715	Non-Specific
7	153	YWHAB	0.122	1.997	8.19672	0.997834	3.03505	Competed and Selective
1	3	TMEM87A	0.183	1.469	5.46448	0.554834	2.45008	Non-Specific
3	3	PAPSS2	0.113	9.713	8.84956	3.27992	3.14561	Non-Specific
2	64	RPL30	0.123	2.765	8.13008	1.46728	3.02327	Competed and Selective
2	9	PI4K2A	0.222	0.598	4.5045	-0.741783	2.17137	Selective
6	106	CHORDC1	0.123	2.314	8.13008	1.21039	3.02327	Competed and Selective
7	27	ALDH1B1	0.123	1.821	8.13008	0.864731	3.02327	Competed and Selective
2	3	RELA	0.088	2.097	11.3636	1.06833	3.50635	Non-Specific
9	100	GOT2	0.124	2.819	8.06452	1.49518	3.01159	Competed and Selective
2	19	STIM1	0.124	1.583	8.06452	0.662661	3.01159	Competed and Selective
7	63	ITGB1	0.079	0.875	12.6582	-0.192645	3.662	Selective
5	13	AIMP2	0.125	9.262	8	3.21132	3	Competed and Selective
2	5	CHTOP	0.126	15.17	7.93651	3.92315	2.9885	Competed and Selective
1	2	C8orf33	0.032	46.699	31.25	5.54532	4.96578	Non-Specific
2	43	CDK13	0.126	6.194	7.93651	2.63087	2.9885	Competed and Selective
20	523	ANXA2	0.126	2.832	7.93651	1.50182	2.9885	Competed and Selective
1	2	HEATR1	0.286	9.701	3.4965	3.27813	1.80591	Non-Specific
2	11	MCMBP	0.126	4.182	7.93651	2.06419	2.9885	Competed and Selective
3	7		0.126	3.099	7.93651	1.6318	2.9885	Non-Specific
7	54	GSTO1	0.075	1.411	13.3333	0.496718	3.73697	Selective
5	13	POLR2H	0.126	2.601	7.93651	1.37907	2.9885	Competed and Selective
14	228	DDX39B	0.127	1.983	7.87402	0.987685	2.9771	Competed and Selective
2	4	PRMT3	0.03	16.76	33.3333	4.06695	5.05889	Non-Specific
1	6	HEXIM1	0.326	6.806	3.06748	2.76681	1.61706	Non-Specific
1	6	ANP32E	0.078	2.382	12.8205	1.25217	3.68038	Non-Specific
1	2	LARP7	0.13	20.299	7.69231	4.34334	2.94342	Non-Specific
5	36	PSMD8	0.127	1.616	7.87402	0.692427	2.9771	Competed and Selective
2	4	PGM3	0.144	1.835	6.94444	0.87578	2.79586	Non-Specific
3	7	NOL6	0.128	7.727	7.8125	2.94991	2.96578	Competed and Selective
3	20	U2AF1; LOC102724594; U2AF1L5	0.128	3.803	7.8125	1.92714	2.96578	Competed and Selective
7	66	RAP1B	0.128	1.697	7.8125	0.762987	2.96578	Competed and Selective
31	859	HSP90B1	0.129	1.577	7.75194	0.657183	2.95456	Competed and Selective
3	10	THRAP3	0.13	5.247	7.69231	2.39149	2.94342	Competed and Selective
2	13	COPS8	0.13	2.356	7.69231	1.23634	2.94342	Competed and Selective
3	5	NPTN	0.496	0.56	2.01613	-0.836501	1.01159	Selective
1	5	SMNDC1	1.761	1.213	0.567859	0.27858	-0.816395	Non-Specific
1	1	NOP2	0.221	21.85	4.52489	4.44956	2.17788	Non-Specific
6	46	MAT2A	0.13	2.136	7.69231	1.09491	2.94342	Competed and Selective
4	33	UBE2M	0.13	2.108	7.69231	1.07587	2.94342	Competed and Selective
1	1	PSME4	2.238	0.496	0.446828	-1.01159	-1.16221	Non-Specific
5	7	POLD1	0.131	13.094	7.63359	3.71083	2.93236	Competed and Selective
4	32	SAR1B	0.131	2.041	7.63359	1.02928	2.93236	Competed and Selective
7	77	PSMB1	0.131	1.791	7.63359	0.840765	2.93236	Competed and Selective
1	6	MTCH1	0.064	7.803	15.625	2.96403	3.96578	Non-Specific
6	10	PDK3	0.132	9.557	7.57576	3.25656	2.92139	Competed and Selective
1	4	COPZ1	0.065	2.005	15.3846	1.0036	3.94342	Non-Specific
1	9	CUTA	0.095	2.327	10.5263	1.21847	3.39593	Non-Specific
3	25	CYB5B	0.045	1.124	22.2222	0.168642	4.47393	Selective
2	51	SNRPE	0.132	2.72	7.57576	1.44361	2.92139	Competed and Selective
29	463	VCP	0.132	1.994	7.57576	0.995665	2.92139	Competed and Selective
1	4	HMCN1	0.021	61.842	47.619	5.95052	5.57347	Non-Specific
2	2	PKP2	0.094	5.886	10.6383	2.55729	3.4112	Non-Specific
3	6	C16orf80; CFAP20	0.132	2.512	7.57576	1.32884	2.92139	Competed and Selective
10	197	PHB	0.132	2.021	7.57576	1.01507	2.92139	Competed and Selective
14	140	TXNRD1	0.159	1.488	6.28931	0.573375	2.6529	Selective
6	31	PSME3	0.132	1.747	7.57576	0.80488	2.92139	Competed and Selective
33	1734	HSP90AA1	0.133	1.687	7.5188	0.75446	2.9105	Competed and Selective
10	101	PFAS	0.153	1.4	6.53595	0.485427	2.7084	Selective
4	25	TMEM43	0.096	0.884	10.4167	-0.177882	3.38082	Selective
5	98	PCNA	0.134	2.458	7.46269	1.29748	2.8997	Competed and Selective
7	126	HNRNPD	0.135	2.78	7.40741	1.47508	2.88897	Competed and Selective
2	14	TRMT6	0.137	2.794	7.29927	1.48233	2.86775	Competed and Selective
7	19	GPD2	0.137	2.535	7.29927	1.34199	2.86775	Competed and Selective
12	42	LMNB1	0.137	2.12	7.29927	1.08406	2.86775	Competed and Selective
2	4	SCD	0.142	100	7.04225	6.64386	2.81604	Non-Specific
8	66	PITPNB	0.203	1.218	4.92611	0.284514	2.30045	Selective
4	11	APOA1BP; NAXE	0.138	3.675	7.24638	1.87774	2.85726	Competed and Selective
3	6	ATP6V1C1	0.139	4.144	7.19424	2.05102	2.84684	Competed and Selective
9	52	SSB	0.139	1.742	7.19424	0.800745	2.84684	Competed and Selective
4	5	DOCK7	0.14	5.887	7.14286	2.55753	2.8365	Competed and Selective
3	6	DHX36	0.14	2.773	7.14286	1.47145	2.8365	Competed and Selective
3	5	PLCG1	0.14	2.695	7.14286	1.43029	2.8365	Competed and Selective
2	10	PSMF1	0.14	1.902	7.14286	0.927517	2.8365	Competed and Selective
1	2	POLR2C	0.457	0.57	2.18818	-0.810966	1.12973	Non-Specific
1	8	RPS29	0.011	5.863	90.9091	2.55164	6.50635	Non-Specific
3	9	ADH5	0.14	1.599	7.14286	0.67717	2.8365	Competed and Selective
6	14	HCFC1	0.141	3.289	7.0922	1.71765	2.82623	Competed and Selective
3	55	TPT1	0.142	2.576	7.04225	1.36513	2.81604	Competed and Selective
3	3	TBRG4	0.168	16.751	5.95238	4.06618	2.57347	Non-Specific
1	2	CMAS	1.195	1.425	0.83682	0.510962	-0.257011	Non-Specific
3	14	GOLIM4	0.086	1.302	11.6279	0.380729	3.53952	Selective
7	105	RAB14	0.121	1.273	8.26446	0.348232	3.04692	Selective
2	56	EIF1AY	0.143	4.248	6.99301	2.08678	2.80591	Competed and Selective
1	1	RETSAT	0.14	5.417	7.14286	2.43749	2.8365	Non-Specific
4	24	CNN3	0.143	2.014	6.99301	1.01006	2.80591	Competed and Selective
1	3	PREPL	0.028	5.371	35.7143	2.42519	5.15843	Non-Specific
6	86	RAB8A	0.051	1.446	19.6078	0.532068	4.29336	Selective
8	76	CBR1; SETD4	0.144	2.163	6.94444	1.11303	2.79586	Competed and Selective
3	10	GHITM	0.163	1.474	6.13497	0.559737	2.61706	Selective
1	5	SMARCB1	0.044	4.407	22.7273	2.1398	4.50635	Non-Specific
1	1	RAI14	0.013	2.683	76.9231	1.42385	6.26534	Non-Specific
2	3	NCKAP1	0.025	4.132	40	2.04684	5.32193	Non-Specific
10	224	RPSA	0.144	1.506	6.94444	0.590722	2.79586	Competed and Selective
4	7	ARL3	0.145	2.316	6.89655	1.21164	2.78588	Competed and Selective
2	6	FKBP10	0.145	2.018	6.89655	1.01293	2.78588	Competed and Selective
4	18	SRM	0.145	1.739	6.89655	0.798258	2.78588	Competed and Selective
11	19	TRIP12	0.146	8.397	6.84932	3.06987	2.77596	Competed and Selective
3	4	CPSF1	0.2	11.368	5	3.50691	2.32193	Non-Specific
3	9	ALDH3A2	0.146	3.029	6.84932	1.59884	2.77596	Competed and Selective
1	3	NAE1	0.05	1.78	20	0.831877	4.32193	Non-Specific
9	298	RAN	0.146	1.77	6.84932	0.823749	2.77596	Competed and Selective
9	148	PSMA7	0.147	2.054	6.80272	1.03844	2.76611	Competed and Selective
1	3	MRPS14	0.078	6.683	12.8205	2.7405	3.68038	Non-Specific
4	5	ARHGEF2	0.148	5.059	6.75676	2.33885	2.75633	Competed and Selective
1	1	MRPL9	0.094	14.001	10.6383	3.80746	3.4112	Non-Specific
5	29	SF1	0.148	2.016	6.75676	1.0115	2.75633	Competed and Selective
2	3	TJP1	0.081	21.458	12.3457	4.42344	3.62593	Non-Specific
1	1	SMARCD2	0.149	3.361	6.71141	1.74889	2.74662	Non-Specific
1	4	SLC25A22	0.097	13.26	10.3093	3.72901	3.36587	Non-Specific
8	96	CDC37	0.148	1.615	6.75676	0.691534	2.75633	Competed and Selective
4	18	SEC61A1	0.149	16.916	6.71141	4.08032	2.74662	Competed and Selective
9	81	HMOX2	0.05	1.134	20	0.181421	4.32193	Selective
19	303	SHMT2	0.149	2.954	6.71141	1.56267	2.74662	Competed and Selective
25	315	PCCA	1.141	1.187	0.876424	0.24732	-0.190299	Non-Specific
1	6	DNAJC5	0.072	1.432	13.8889	0.518031	3.79586	Non-Specific
3	5	FAM134C; RETREG3	0.149	1.656	6.71141	0.727703	2.74662	Competed and Selective
2	3	ESYT2	0.156	8.962	6.41026	3.16382	2.68038	Non-Specific
7	60	FARSA	0.15	5.195	6.66667	2.37712	2.73697	Competed and Selective
1	2	TTI1	0.306	7.026	3.26797	2.8127	1.7084	Non-Specific
2	4	ARFGAP1	0.195	0.497	5.12821	-1.00868	2.35845	Non-Specific
3	4	SMCHD1	0.115	40.192	8.69565	5.32884	3.12029	Non-Specific
9	160	MDH2	0.15	2.263	6.66667	1.17824	2.73697	Competed and Selective
8	97	MAPRE1	0.151	2.756	6.62252	1.46258	2.72738	Competed and Selective
1	1	ZSWIM8	0.351	4.555	2.849	2.18745	1.51046	Non-Specific
1	6	COX5A	0.176	2.136	5.68182	1.09491	2.50635	Non-Specific
3	46	SRSF6	0.152	3.666	6.57895	1.87421	2.71786	Competed and Selective
2	11	MOGS	0.152	2.841	6.57895	1.5064	2.71786	Competed and Selective
3	16	TNPO3	0.152	2.071	6.57895	1.05033	2.71786	Competed and Selective
6	33	CAPZA1	0.539	1.326	1.85529	0.407081	0.891643	Selective
1	3	MOB2	0.195	2.644	5.12821	1.40272	2.35845	Non-Specific
10	200	PPIB	0.152	1.673	6.57895	0.742437	2.71786	Competed and Selective
3	7	IFIT5	0.153	5.449	6.53595	2.44599	2.7084	Competed and Selective
5	58	ATP5O	0.153	2.591	6.53595	1.37351	2.7084	Competed and Selective
15	312	YWHAE	0.154	1.79	6.49351	0.83996	2.699	Competed and Selective
1	4	IBA57	0.17	4.184	5.88235	2.06488	2.55639	Non-Specific
25	435	MCCC1	1.181	1.176	0.84674	0.233888	-0.240009	Non-Specific
14	134	GLUD1	0.154	2.429	6.49351	1.28036	2.699	Competed and Selective
5	31	DLAT	0.156	2.091	6.41026	1.06419	2.68038	Competed and Selective
2	3	LAS1L	0.1	3.407	10	1.7685	3.32193	Non-Specific
1	2	RPS6KB2	0.409	5.933	2.44499	2.56876	1.28983	Non-Specific
7	52	JUP	0.157	4.843	6.36943	2.2759	2.67116	Competed and Selective
3	7	PSME1	0.162	1.229	6.17284	0.297485	2.62593	Selective
18	392	CANX	0.086	1.369	11.6279	0.453122	3.53952	Selective
6	24	ACO1	0.158	2.669	6.32911	1.4163	2.662	Competed and Selective
2	2	GTPBP1	0.488	6.568	2.04918	2.71545	1.03505	Non-Specific
1	141	NOTCH2	1.081	1.137	0.925069	0.185232	-0.112367	Non-Specific
4	9	PGLS	0.158	1.852	6.32911	0.889084	2.662	Competed and Selective
4	22	SPAG9	0.161	1.748	6.21118	0.805705	2.63487	Competed and Selective
1	3	MLF2	5.377	4.687	0.185977	2.22866	-2.4268	Non-Specific
2	4	USP39	0.19	7.779	5.26316	2.95958	2.39593	Non-Specific
2	3	DAP3	0.154	4.187	6.49351	2.06592	2.699	Non-Specific
4	9	RAE1	0.163	4.216	6.13497	2.07587	2.61706	Competed and Selective
3	9	PPP2R5C	0.163	3.054	6.13497	1.6107	2.61706	Competed and Selective
1	29	TMEM219	1.135	0.738	0.881057	-0.438307	-0.182692	Non-Specific
3	24	KHDRBS1	0.164	3.98	6.09756	1.99277	2.60823	Competed and Selective
2	44	UBE2V1; TMEM189-UBE2V1	0.164	1.799	6.09756	0.847195	2.60823	Competed and Selective
2	4	SAMHD1	0.17	6.933	5.88235	2.79348	2.55639	Non-Specific
3	48	PPA2	0.165	1.943	6.06061	0.958286	2.59946	Competed and Selective
3	17	UAP1	0.166	1.561	6.0241	0.642471	2.59074	Competed and Selective
1	6	PGP	0.159	2.202	6.28931	1.13881	2.6529	Non-Specific
3	4	GMPPA	0.134	4.087	7.46269	2.03104	2.8997	Non-Specific
1	1	TMEM184C	0.907	1.18	1.10254	0.238787	0.140826	Non-Specific
2	3	GSK3B	0.137	8.878	7.29927	3.15023	2.86775	Non-Specific
10	130	GOT1	0.417	0.922	2.39808	-0.117161	1.26188	Selective
3	6	MPST	0.167	2.312	5.98802	1.20914	2.58208	Competed and Selective
3	10	LUC7L2	0.168	4.231	5.95238	2.081	2.57347	Competed and Selective
7	47	LAP3	0.168	1.732	5.95238	0.792439	2.57347	Competed and Selective
4	11	AFG3L2	0.169	3.861	5.91716	1.94897	2.5649	Competed and Selective
2	3	ATG4B	0.052	4.872	19.2308	2.28451	4.26534	Non-Specific
1	3	SLC34A3	0.036	2.331	27.7778	1.22095	4.79586	Non-Specific
4	76	CAPZB	0.169	1.758	5.91716	0.813935	2.5649	Competed and Selective
2	12	COASY	0.17	3.006	5.88235	1.58785	2.55639	Competed and Selective
7	244	CFL1	0.17	2.173	5.88235	1.11969	2.55639	Competed and Selective
2	7	NIPSNAP3A	0.17	2.071	5.88235	1.05033	2.55639	Competed and Selective
1	4	ERAP1	0.048	2.665	20.8333	1.41414	4.38082	Non-Specific
3	20	ANP32B	0.17	2.036	5.88235	1.02574	2.55639	Competed and Selective
1	1	GALNT7	0.265	1.522	3.77358	0.605968	1.91594	Non-Specific
2	4	TRIO	0.167	11.477	5.98802	3.52067	2.58208	Non-Specific
2	2	CTR9	0.107	17.324	9.34579	4.1147	3.22432	Non-Specific
4	32	SLC7A5	0.17	1.635	5.88235	0.709291	2.55639	Competed and Selective
4	8	IARS2	0.171	4.295	5.84795	2.10266	2.54793	Competed and Selective
2	2	NUP188	0.128	4.268	7.8125	2.09356	2.96578	Non-Specific
1	2	SLC33A1	0.226	2.967	4.42478	1.569	2.14561	Non-Specific
16	177	P4HB	0.094	0.822	10.6383	-0.28279	3.4112	Selective
5	7	POLDIP2	0.171	1.609	5.84795	0.686164	2.54793	Competed and Selective
3	8	FAM129B	0.172	3.69	5.81395	1.88362	2.53952	Competed and Selective
6	99	SRSF1	0.173	2.352	5.78035	1.23389	2.53116	Competed and Selective
2	5	ANXA7	0.173	1.64	5.78035	0.713696	2.53116	Competed and Selective
11	433	ALDOA	0.174	2.501	5.74713	1.32251	2.52284	Competed and Selective
1	6	ISYNA1	0.077	2.428	12.987	1.27977	3.699	Non-Specific
1	6	NUCB2	0.224	0.488	4.46429	-1.03505	2.15843	Non-Specific
5	11	TELO2	0.175	11.228	5.71429	3.48903	2.51457	Competed and Selective
1	14	FKBP1A	0.483	1.198	2.07039	0.260628	1.0499	Non-Specific
3	36	PSMA3	0.175	1.587	5.71429	0.666302	2.51457	Competed and Selective
4	38	AASDHPPT	0.176	2.297	5.68182	1.19975	2.50635	Competed and Selective
4	11	MRPL44	0.176	1.562	5.68182	0.643394	2.50635	Competed and Selective
6	49	APRT	0.177	1.868	5.64972	0.901494	2.49818	Competed and Selective
3	22	UROD	0.177	1.848	5.64972	0.885965	2.49818	Competed and Selective
4	10	ATP6AP1	0.178	1.583	5.61798	0.662661	2.49005	Competed and Selective
1	3	MED15	0.084	2.753	11.9048	1.461	3.57347	Non-Specific
4	20	AK1	0.179	3.077	5.58659	1.62152	2.48197	Competed and Selective
4	21	G3BP2	0.181	4.826	5.52486	2.27083	2.46594	Competed and Selective
1	2	PTGR1	0.691	0.396	1.44718	-1.33643	0.533242	Non-Specific
3	7	PREP	0.182	2.011	5.49451	1.00791	2.45799	Competed and Selective
1	1	KIF13B	0.828	12.949	1.20773	3.69477	0.272297	Non-Specific
3	4	KIF4A	0.15	7.851	6.66667	2.97288	2.73697	Non-Specific
2	4	C2orf47; MAIP1	0.164	2.485	6.09756	1.31325	2.60823	Non-Specific
1	2	IKBKG	25.296	0.014	0.0395319	-6.15843	-4.66084	Non-Specific
6	68	PSMB3	0.182	1.916	5.49451	0.938098	2.45799	Competed and Selective
2	11	RTN3	0.183	2.792	5.46448	1.4813	2.45008	Competed and Selective
9	99	TALDO1	0.183	1.625	5.46448	0.70044	2.45008	Competed and Selective
2	2	CCAR1	0.143	8.931	6.99301	3.15882	2.80591	Non-Specific
28	901	HSPD1	0.184	1.668	5.43478	0.738119	2.44222	Competed and Selective
7	158	EIF5A	0.184	1.827	5.43478	0.869477	2.44222	Competed and Selective
4	12	IDH1	0.185	2.073	5.40541	1.05172	2.4344	Competed and Selective
1	2	C20orf27	0.221	0.617	4.52489	-0.696658	2.17788	Non-Specific
2	3	ASNA1	0.123	1.43	8.13008	0.516015	3.02327	Non-Specific
1	3	MYO1C	0.142	33.109	7.04225	5.04915	2.81604	Non-Specific
6	68	PSAT1	0.053	1.459	18.8679	0.54498	4.23786	Selective
2	4	SPG20; SPART	0.062	6.601	16.129	2.72268	4.01159	Non-Specific
1	4	H1FX	0.023	4.156	43.4783	2.0552	5.44222	Non-Specific
1	1	TIMM23B; LINC00843; LOC100652748	0.021	6.087	47.619	2.60573	5.57347	Non-Specific
3	3	NAA25	0.088	12.502	11.3636	3.64409	3.50635	Non-Specific
5	179	PCBP2	0.185	1.925	5.40541	0.944858	2.4344	Competed and Selective
2	83	ALDOC	0.186	1.883	5.37634	0.913033	2.42663	Competed and Selective
2	2	CNOT3	0.169	7.638	5.91716	2.93319	2.5649	Non-Specific
1	10	ZNF207	0.023	2.725	43.4783	1.44626	5.44222	Non-Specific
1	5	SEC24D	0.073	3.538	13.6986	1.82293	3.77596	Non-Specific
2	3	UBAC2	0.2	18.71	5	4.22574	2.32193	Non-Specific
1	1	NLN	0.125	3.407	8	1.7685	3	Non-Specific
1	44	GALNT10	0.545	2.098	1.83486	1.06901	0.875672	Non-Specific
3	11	CLCC1	0.123	0.677	8.13008	-0.562772	3.02327	Selective
3	40	DLD	0.187	1.985	5.34759	0.989139	2.41889	Competed and Selective
12	53	NOMO2	0.189	1.502	5.29101	0.586885	2.40354	Competed and Selective
1	1	C1orf122	0.198	3.309	5.05051	1.7264	2.33643	Non-Specific
2	5	MRPL13	0.19	1.864	5.26316	0.898402	2.39593	Competed and Selective
1	1	ANKRD17	0.197	2.266	5.07614	1.18015	2.34373	Non-Specific
7	102	TAGLN2	0.191	1.567	5.2356	0.648005	2.38836	Competed and Selective
1	16	PPIF	0.756	0.613	1.32275	-0.706041	0.403542	Non-Specific
1	1	UCHL5	0.221	1.642	4.52489	0.715454	2.17788	Non-Specific
5	32	SQSTM1	0.378	1.101	2.6455	0.138814	1.40354	Selective
2	9	IMPA1	0.123	1.25	8.13008	0.321928	3.02327	Selective
18	1272	ACTG1	0.192	1.686	5.20833	0.753605	2.38082	Competed and Selective
2	8	RAB9A	0.193	3.455	5.18135	1.78869	2.37333	Competed and Selective
4	22	PGM1	0.193	1.558	5.18135	0.639695	2.37333	Competed and Selective
1	1	RBM12B	0.677	3.952	1.4771	1.98258	0.562772	Non-Specific
4	12	SLK	0.196	4.615	5.10204	2.20633	2.35107	Competed and Selective
1	2	GBAS; NIPSNAP2	0.205	4.428	4.87805	2.14666	2.2863	Non-Specific
2	13	ATP5H	0.197	2.155	5.07614	1.10769	2.34373	Competed and Selective
4	28	EWSR1	0.199	1.675	5.02513	0.744161	2.32916	Competed and Selective
43	1360	PC	1.058	1.213	0.94518	0.27858	-0.0813396	Non-Specific
2	8	RRAS2	0.2	1.683	5	0.751035	2.32193	Competed and Selective
1	1	SFXN4	0.07	12.647	14.2857	3.66072	3.8365	Non-Specific
1	1	SH3GL1	0.022	34.236	45.4545	5.09744	5.50635	Non-Specific
1	3	SUCLA2	0.077	2.697	12.987	1.43136	3.699	Non-Specific
3	29	SRSF5	0.202	9.229	4.9505	3.20617	2.30757	Competed and Selective
1	17	C19orf71	2.258	0.497	0.44287	-1.00868	-1.17505	Non-Specific
1	2	MGST3	0.083	7.105	12.0482	2.82883	3.59074	Non-Specific
4	34	TNPO2	0.359	0.381	2.78552	-1.39214	1.47794	Selective
2	5	RIF1	0.205	9.765	4.87805	3.28762	2.2863	Competed and Selective
1	1	FAF1	0.427	1.459	2.34192	0.54498	1.22769	Non-Specific
1	7	DENR	0.055	17.625	18.1818	4.13955	4.18442	Non-Specific
2	4	RFC4	0.178	2.684	5.61798	1.42438	2.49005	Non-Specific
6	79	SERBP1	0.208	2.101	4.80769	1.07108	2.26534	Competed and Selective
2	4	TP53	0.086	18.617	11.6279	4.21855	3.53952	Non-Specific
12	139	PSMA1	0.21	2.103	4.7619	1.07245	2.25154	Competed and Selective
3	6	FANCI	0.211	5.069	4.73934	2.3417	2.24469	Competed and Selective
19	542	ATP5A1	0.211	2.155	4.73934	1.10769	2.24469	Competed and Selective
2	7	DCTN2	0.212	2.673	4.71698	1.41846	2.23786	Competed and Selective
1	1	MAP2K3	0.083	18.665	12.0482	4.22226	3.59074	Non-Specific
1	1	DCAKD	0.293	6.668	3.41297	2.73725	1.77103	Non-Specific
2	11	FAH	0.212	2.102	4.71698	1.07176	2.23786	Competed and Selective
1	2	ARL8A	0.156	1.707	6.41026	0.771463	2.68038	Non-Specific
1	15	TMED2	0.056	2.003	17.8571	1.00216	4.15843	Non-Specific
5	9	MYOF	0.214	6.416	4.6729	2.68167	2.22432	Competed and Selective
1	1	TMBIM6	0.446	1.554	2.24215	0.635987	1.16488	Non-Specific
1	1	RFT1	0.153	4.505	6.53595	2.17153	2.7084	Non-Specific
7	68	MYL12B; MYL12A	0.214	3.303	4.6729	1.72378	2.22432	Competed and Selective
1	6	ECH1	0.337	15.266	2.96736	3.93225	1.56918	Non-Specific
20	276	VIM	0.216	2.106	4.62963	1.07451	2.2109	Competed and Selective
8	69	GARS	0.106	1.497	9.43396	0.582074	3.23786	Selective
1	1	TMEM165	0.069	10.814	14.4928	3.43483	3.85726	Non-Specific
4	6	DRG2	0.217	3.797	4.60829	1.92486	2.20423	Competed and Selective
4	13	ATP6V1H	0.217	2.947	4.60829	1.55925	2.20423	Competed and Selective
1	3	F8	1.341	6.666	0.745712	2.73682	-0.423309	Non-Specific
3	10	STK24	0.218	4.233	4.58716	2.08168	2.1976	Competed and Selective
5	15	P4HA1	0.219	1.658	4.56621	0.729444	2.191	Competed and Selective
2	12	ADRM1	0.1	0.877	10	-0.189351	3.32193	Selective
19	376	PGK1	0.22	1.617	4.54545	0.69332	2.18442	Competed and Selective
1	1	LMBRD2	0.12	2.463	8.33333	1.30042	3.05889	Non-Specific
2	2	VMP1	0.092	2.109	10.8696	1.07656	3.44222	Non-Specific
2	39	SRSF3	0.222	2.837	4.5045	1.50437	2.17137	Competed and Selective
1	2	EXOSC3	0.023	24.626	43.4783	4.62211	5.44222	Non-Specific
1	1	CXorf57	0.106	20.107	9.43396	4.32963	3.23786	Non-Specific
9	193	PPA1	0.222	1.691	4.5045	0.757877	2.17137	Competed and Selective
3	34	SRSF7	0.226	7.682	4.42478	2.94148	2.14561	Competed and Selective
1	1	ACAP2	0.251	11.336	3.98406	3.50284	1.99424	Non-Specific
2	4		0.2	3.528	5	1.81885	2.32193	Non-Specific
2	3	PTRH2	0.385	0.764	2.5974	-0.388355	1.37707	Non-Specific
1	4	SNAP23	0.059	3.11	16.9492	1.63691	4.08314	Non-Specific
5	14	FN1	0.226	3.255	4.42478	1.70266	2.14561	Competed and Selective
2	2	SLC12A2	0.239	2.198	4.1841	1.13619	2.06492	Non-Specific
1	2	POLD3	0.092	49.019	10.8696	5.61527	3.44222	Non-Specific
4	10	UGP2	0.227	1.979	4.40529	0.984772	2.13924	Competed and Selective
6	33	C14orf166; RTRAF	0.228	2.161	4.38596	1.1117	2.13289	Competed and Selective
2	5	CPSF7	0.23	1.641	4.34783	0.714575	2.12029	Competed and Selective
3	8	UBAP2L	0.233	4.493	4.29185	2.16768	2.1016	Competed and Selective
4	67	HIST1H4A; HIST1H4F; HIST1H4D; HIST1H4J; HIST1H4H; HIST1H4C; HIST4H4; HIST2H4B; HIST1H4E; HIST1H4I; HIST1H4B; HIST2H4A; HIST1H4K; HIST1H4L	0.234	2.753	4.2735	1.461	2.09542	Competed and Selective
2	3	MRPL28	0.617	1.693	1.62075	0.759582	0.696658	Non-Specific
6	75	UCHL1	0.234	1.58	4.2735	0.659925	2.09542	Competed and Selective
1	1	FAM91A1	0.181	7.037	5.52486	2.81496	2.46594	Non-Specific
5	92	PEBP1	0.236	1.705	4.23729	0.769772	2.08314	Competed and Selective
2	2	MALT1	0.293	1.387	3.41297	0.471968	1.77103	Non-Specific
4	7	CLASP1	0.241	8.173	4.14938	3.03087	2.05289	Competed and Selective
2	2	NEDD4L	0.118	19.506	8.47458	4.28585	3.08314	Non-Specific
26	605	ENO1	0.241	1.756	4.14938	0.812293	2.05289	Competed and Selective
2	3	EIF2B1	0.132	3.49	7.57576	1.80323	2.92139	Non-Specific
1	1	CCBL2; KYAT3	0.107	52.653	9.34579	5.71844	3.22432	Non-Specific
1	1	ARHGEF1	0.2	5.492	5	2.45733	2.32193	Non-Specific
3	23	DUT	0.334	0.728	2.99401	-0.45799	1.58208	Selective
2	4	GTF2E2	0.311	3.13	3.21543	1.64616	1.68501	Non-Specific
1	7	SPCS1	0.427	0.377	2.34192	-1.40736	1.22769	Non-Specific
1	1	RPP30	0.237	7.209	4.21941	2.8498	2.07704	Non-Specific
1	1	ECI2	0.107	40.959	9.34579	5.35611	3.22432	Non-Specific
2	2	AQR	0.179	11.333	5.58659	3.50246	2.48197	Non-Specific
4	7	FLII	0.242	12.582	4.13223	3.65329	2.04692	Competed and Selective
1	4	HTATIP2	0.148	0.568	6.75676	-0.816037	2.75633	Non-Specific
3	79	RTN4	0.026	1.327	38.4615	0.408168	5.26534	Selective
3	16	PARVA	0.272	1.454	3.67647	0.540027	1.87832	Selective
2	10	TIPRL	0.242	1.859	4.13223	0.894527	2.04692	Competed and Selective
1	1	KPRP	6.263	0.513	0.159668	-0.962969	-2.64685	Non-Specific
2	10	YTHDF1	0.245	1.621	4.08163	0.696884	2.02915	Competed and Selective
1	4	RYR1	0.255	4.796	3.92157	2.26183	1.97143	Non-Specific
1	1	SYNJ2BP	0.58	1.017	1.72414	0.0243197	0.785875	Non-Specific
3	9	ALG5	0.677	0.538	1.4771	-0.894322	0.562772	Non-Specific
12	312	PHB2	0.248	1.856	4.03226	0.892197	2.01159	Competed and Selective
8	111	IMPDH2	0.249	1.623	4.01606	0.698663	2.00578	Competed and Selective
2	2	UBR5	0.69	2.48	1.44928	1.31034	0.535332	Non-Specific
2	7	PPIL1	0.252	1.847	3.96825	0.885184	1.9885	Competed and Selective
1	3	PURG	0.01	66.923	100	6.06443	6.64386	Non-Specific
1	13	CNN2	0.151	2.988	6.62252	1.57918	2.72738	Non-Specific
1	2	NDRG1	0.319	2.009	3.1348	1.00648	1.64837	Non-Specific
1	2	MRPS16	0.046	3.481	21.7391	1.7995	4.44222	Non-Specific
[truncated: 503 more rows]
