# Supplementary material for: Cell-based HTS identifies a chemical chaperone for preventing ER protein aggregation and proteotoxicity
Source: eLife journal article supplement (doi:10.7554/elife.43302), 2019-12-16
Supplement: supp [file elife-43302-supp-v1.zip › elife_poa_e43302_Figure_6_source_data_1.xlsx]

## Sheet: Figure 6B
Figure 6-B
IBT21
(μM)
0.0390625	6.73308	15.5055	-8.22044	15.1701
0.078125	7.05481	14.9871	2.84823	9.10321
0.15625	25.3496	27.0094	29.0417	14.8724
0.3125	41.398	48.0058	46.0486	48.8776
0.625	67.4712	74.5062	73.9154	73.2771
1.25	92.2223	90.3596	90.1121	91.9458
2.5	90.9557	97.4861	96.9523	98.6939
5	97.0581	98.4236	97.202	98.5026
diazido-IBT21
(μM)
0.0390625	3.71481	9.37784	18.2957	11.5383
0.078125	12.7199	14.3334	14.1202	7.8382
0.15625	29.2379	27.1626	35.5208	38.1512
0.3125	50.8	52.6917	48.4687	55.7879
0.625	78.8587	80.1891	75.3691	77.3142
1.25	96.7138	96.3686	93.9997	90.9939
2.5	98.9052	99.2405	97.4956	101.111
5	99.803	100.14	100.622	100.314
IBT22
(μM)
0.0390625	8.11464	9.11036	27.4251	17.8976
0.078125	32.9595	37.4239	28.2734	37.0166
0.15625	62.993	65.0037	52.2677	61.4612
0.3125	82.3286	84.3418	83.9192	88.2183
0.625	96.7848	97.6584	96.0341	96.8271
1.25	97.9058	99.2767	100.571	97.7189
2.5	99.6388	99.2228	100.779	101.031
5	98.2819	99.0277	100.296	101.351
