# Supplementary material for: Cell-based HTS identifies a chemical chaperone for preventing ER protein aggregation and proteotoxicity
Source: eLife journal article supplement (doi:10.7554/elife.43302), 2019-12-16
Supplement: supp [file elife-43302-supp-v1.zip › elife_poa_e43302_Figure_6_source_data_2.xlsx]

## Sheet: Figure 6G
Gene	Protein	Accession number	# Peptides	# PSMs	Abundance Ratio: (probe +/–)	Abundance Ratio: (competitor +/–)	Abundances (probe–, competitor–)	Abundances (probe+, competitor–)	Abundances (probe+, competitor+)
AHCY	Adenosylhomocysteinase	P23526	14	413	11.6279	2.655	25.9	230.2	83.3
AKR1B1	Aldose reductase	P15121	4	13	37.037	1.52	9.8	218.5	135.9
ALYREF	THO complex subunit 4	Q86V81	4	18	43.4783	35.739	13	496.8	13.4
ANXA1	Annexin A1	P04083	20	273	16.9492	2.263	16.5	224.7	104.4
ARF3	ADP-ribosylation factor 3	P61204	9	259	10.3093	1.671	17.9	185.9	113.5
ARF4	ADP-ribosylation factor 4	P18085	7	196	25	1.658	12.8	206.9	113.2
CCT7	T-complex protein 1 subunit eta	Q99832	17	223	22.7273	4.519	13.2	320.1	67.2
CDK1	Cyclin-dependent kinase 1	P06493	12	133	14.4928	3.37	19.2	256.8	69.4
CHID1	Chitinase domain-containing protein 1	Q9BWS9	4	8	21.7391	6.199	25.5	306.2	53.8
CLU	Clusterin	P10909	2	8	11.1111	12.094	32.2	372.5	29.7
CTSD	Cathepsin D	P07339	8	104	2.93255	1.765	48.7	138.5	85.9
DSP	Desmoplakin	P15924	45	163	27.027	14.669	18	405.7	31.6
EEF2	Elongation factor 2	P13639	36	1374	14.0845	3.538	22.2	265.2	78.1
EIF2S3	Eukaryotic translation initiation factor 2 subunit 3	P41091	8	90	18.5185	6.101	13.9	318.8	58.4
ENO1	Alpha-enolase	P06733	26	605	4.14938	1.756	36.8	155.4	102
EZR	Ezrin	P15311	14	81	10	2.166	23.2	233.7	93.1
FLNB	Filamin-B	O75369	26	227	20.8333	3.243	27.5	269.1	87.1
GANAB	Neutral alpha-glucosidase AB	Q14697	35	662	17.5439	3.636	17.6	272.8	79.3
GGH	Gamma-glutamyl hydrolase	Q92820	2	5	38.4615	3.524	11.8	294.2	62.2
GSTP1	Glutathione S-transferase P	P09211	9	272	3.90625	1.713	34.8	205	100.4
HMGB1	High mobility group protein B1	P09429	7	79	23.2558	3.76	13.7	294.8	78.1
HMGB2	High mobility group protein B2	P26583	4	26	31.25	6.798	5.2	347.6	54.3
HSP90AA1	Heat shock protein HSP 90-alpha	P07900	33	1734	7.5188	1.687	22	149.2	86.4
HSP90AB1	Heat shock protein HSP 90-beta	P08238	37	1809	9.09091	1.89	20.2	170.7	91.2
HYOU1	Hypoxia up-regulated protein 1	Q9Y4L1	19	89	19.2308	3.146	18.9	332.3	105.7
JUP	Junction plakoglobin	P14923	7	52	6.36943	4.843	33.8	210.4	46.1
KRT10	Keratin, type I cytoskeletal 10	P13645	22	702	1.5873	1.974	93.8	98.4	58.8
KRT17	Keratin, type I cytoskeletal 17	Q04695	10	72	8.84956	11.214	54.4	332	16.4
KRT2	Keratin, type II cytoskeletal 2 epidermal	P35908	26	532	2.18818	2.539	51.7	148	54
LDHB	L-lactate dehydrogenase B chain	P07195	15	468	9.17431	2.053	23.2	194.4	99.7
MSN	Moesin	P26038	22	195	12.8205	2.001	19	219	95.6
MTHFD1	C-1-tetrahydrofolate synthase, cytoplasmic	P11586	23	200	15.625	4.17	17.7	293.2	74.2
PAICS	Multifunctional protein ADE2	P22234	13	157	14.9254	2.434	19	236.6	98.4
PCMT1	Protein-L-isoaspartate(D-aspartate) O-methyltransferase	P22061	3	11	9.80392	1.678	16.3	184.8	113.8
PEBP1	Phosphatidylethanolamine-binding protein 1	P30086	5	92	4.23729	1.705	40	164	102.1
PGK1	Phosphoglycerate kinase 1	P00558	19	376	4.54545	1.617	36.2	179.6	101.5
PHGDH	D-3-phosphoglycerate dehydrogenase	O43175	10	116	11.4943	2.232	17.3	226.9	108.6
PKM	Pyruvate kinase PKM	P14618	19	556	12.987	3.799	19.3	304.1	74.1
PPIA	Peptidyl-prolyl cis-trans isomerase A	P62937	8	409	3.87597	1.736	41.8	157	100.6
PPIB	Peptidyl-prolyl cis-trans isomerase B	P23284	10	200	6.57895	1.673	30.8	176.8	112.8
PRCP	Lysosomal Pro-X carboxypeptidase	P42785	3	14	10.2041	6.426	25.3	205.2	42.3
PSMA7	Proteasome subunit alpha type-7	O14818	9	148	6.80272	2.054	32.8	187.1	86.4
RAN	GTP-binding nuclear protein Ran	P62826	9	298	6.84932	1.77	25.4	176	97.8
RPL27	60S ribosomal protein L27	P61353	8	209	14.9254	4.659	20.2	300.2	68.7
RPS25	40S ribosomal protein S25	P62851	4	169	15.625	4.098	19.4	272.8	69.1
RPS27A	Ubiquitin-40S ribosomal protein S27a	P62979	3	98	8.19672	2.607	17.4	157.3	97.9
RUVBL1	RuvB-like 1	Q9Y265	8	81	24.3902	3.464	134.3	108.9	100.9
SMC2	Structural maintenance of chromosomes protein 2	O95347	15	48	31.25	20.028	13.5	465.5	28.6
SNRPB	Small nuclear ribonucleoprotein-associated proteins B and B'	P14678	3	60	34.4828	2.369	16.5	240.7	98.6
ST13	Hsc70-interacting protein	P50502	4	37	12.8205	1.679	24	194.8	85.7
TAGLN2	Transgelin-2	P37802	7	102	5.2356	1.567	27.3	144.6	92.8
TARS	Threonine--tRNA ligase, cytoplasmic	P26639	14	144	14.9254	2.456	86.1	162.1	98.2
TPI1	Triosephosphate isomerase	P60174	10	277	2.93255	1.858	54.4	160	94.4
TUBB2A	Tubulin beta-2A chain	Q13885	20	1014	10.8696	5.697	14.4	289	68.8
UCHL1	Ubiquitin carboxyl-terminal hydrolase isozyme L1	P09936	6	75	4.2735	1.58	36.6	157.2	114.9
YARS	Tyrosine--tRNA ligase, cytoplasmic	P54577	9	32	17.5439	4.565	15.7	300.5	70.9
YWHAE	14-3-3 protein epsilon	P62258	15	312	6.49351	1.79	51.3	172.3	149.2
YWHAQ	14-3-3 protein theta	P27348	9	196	11.1111	2.951	22.7	192.3	76.2
