# Supplementary material for: Cell-based HTS identifies a chemical chaperone for preventing ER protein aggregation and proteotoxicity
Source: eLife journal article supplement (doi:10.7554/elife.43302), 2019-12-16
Supplement: supp [file elife-43302-supp-v1.zip › elife_poa_e43302_Figure_7_source_data_1.xlsx]

## Sheet: Figure 7B
Fig7B
	0	4	8	12	16	20	24	28	32	36	40	44	48	(h)
UT	100	110.124	117.344	140.427	158.81	170.81	183.257	200.469	218.145	227.262	241.067	247.512	234.272
UT	100	107.203	110.646	122.119	152.75	180.931	206.729	234.996	263.121	275.245	295.051	302.108	292.498
UT	100	110.994	124.223	135.849	164.979	192.434	224.93	257.842	283.856	301.464	317.584	336.286	332.261
CPT	100	100.797	90.0797	85.1014	79.8741	80.3029	81.36	79.0974	75.8893	72.518	72.6812	65.7655	66.8458
CPT	100	92.2161	81.7241	78.0449	74.4109	74.6057	73.4182	72.0553	71.1831	64.238	61.9717	60.6386	56.68
CPT	100	96.6498	83.2236	80.5838	81.996	82.7582	79.5465	74.9891	75.1114	74.2817	72.2767	65.4855	61.7755
Tm	100	108.524	96.4501	94.6471	100.539	98.2411	102.403	102.359	102.515	101.707	102.668	96.8864	96.7131
Tm	100	115.567	101.766	92.7919	91.2054	93.6118	92.5205	91.1928	94.6419	95.3125	92.7306	92.1222	90.3359
Tm	100	106.827	95.6303	92.1985	89.4497	89.5074	87.7122	83.9861	84.1727	80.5042	77.4529	70.2511	64.7029
1 μM IBT21	100	118.771	123.743	135.806	152.086	155.169	159.726	155.514	144.323	143.107	138.077	126.385	111.925
1 μM IBT21	100	120.409	130.967	139.137	153.388	162.23	174.016	178.381	191.562	199.63	212.742	217.694	215.079
1 μM IBT21	100	120.822	128.02	147.602	166.421	180.737	184.599	203.604	224.154	245.218	260.391	273.154	272.186
5 μM IBT21	100	131.636	142.798	168.241	189.85	214.181	241.642	261.982	277.034	279.48	282.249	289.661	294.782
5 μM IBT21	100	132.549	152.475	173.109	190.381	226.72	243.025	261.213	282.482	293.272	301.389	311.18	319.942
5 μM IBT21	100	132.446	144.816	164.363	189.937	219.938	255.541	288.209	308.502	327.976	335.991	342.805	353.23
10 μM IBT21	100	139.903	149.384	168.301	192.041	222.433	255.644	282.963	304.121	321.841	337.794	340.093	342.538
10 μM IBT21	100	129.079	143.371	161.023	182.089	208.692	231.539	259.699	279.722	301.414	313.738	313.08	317.888
10 μM IBT21	100	130.614	136.657	162.365	181.576	214.507	241.602	263.523	286.564	305.159	313.082	331.644	334.466
40 μM AZO	100	138.271	135.866	133.279	130.607	130.086	134.275	143.684	149.653	154.724	171.89	184.989	189.402
40 μM AZO	100	147.313	140.627	131.862	132.309	129.672	133.725	144.332	147.867	151.302	155.604	163.884	168.957
40 μM AZO	100	149.354	139.638	133.953	127.885	130.071	133.562	135.361	140.773	142.688	142.277	140.126	140.431
Fig7C
UT	98.8511	101.246	100.798	99.1057
CPT	45.841	37.8842	40.1783	40.3874
Tm	74.019	76.4624	75.858	74.3795
1 μM IBT21	92.6475	99.6682	95.8777	99.9289
5 μM IBT21	102.646	97.3394	102.099	101.731
10 μM IBT21	102.006	99.741	104.899	99.2442
40 μM AZO	74.9442	76.5053	69.7902	76.5047
Fig7D
UT	0.003	0.012	0.024	0.011
CPT	0.579	0.478	0.558	0.483
Tm	0.114	0.14	0.141	0.136
1 μM IBT21	0.039	0.043	0.016	0
5 μM IBT21	0.005	0.026	0.007	0.014
10 μM IBT21	0	0	0.006	0.012
40 μM AZO	0.052	0.046	0.086	0.085
Fig7F
WT PrP
(h)
0	100	100	100	100	100	100
4	113.23	115.485	116.911	119.428	114.3	113.493
8	127.315	130.406	134.278	131.958	129.039	127.309
12	142.279	148.549	150.84	148.462	146.355	142.583
16	161.32	169.544	172.513	167.559	167.858	161.122
20	185.888	191.553	203.018	191.197	189.922	187.515
24	204.849	217.745	233.386	218.938	218.899	215.324
28	228.794	246.905	268.891	245.945	248.494	246.503
32	255.981	278.359	300.352	277.32	275.449	268.982
36	280.731	296.184	322.794	306.008	294.537	300.976
40	301.346	315.744	336.329	328.53	310.644	325.088
44	320.057	333.235	361.086	348.856	325.553	349.627
48	339.028	356.121	378.142	370.616	339	374.933
52	368.071	381.968	395.621	391.069	358.567	408.901
56	396.986	401.82	413.285	418.614	376.485	437.895
60	424.397	422.56	433.337	444.957	394.589	462.709
64	460.766	438.953	449.986	464.055	421.136	498.907
68	496.236	457.765	477.292	493.516	440.892	538.804
72	535.503	489.374	502.423	521.024	472.631	562.528
mut PrP
(h)
0	100	100	100	100	100	100
4	116.997	117.466	114.923	115.283	116.271	117.851
8	131.008	130.103	132.232	131.067	129.624	131.951
12	147.911	149.813	149.314	148.82	145.02	149.585
16	170.115	168.808	165.551	170.702	167.261	167.555
20	188.628	187.074	187.402	192.281	191.651	193.735
24	207.22	203.4	201.734	217.527	213.231	218.29
28	221.08	214.824	210.733	236.443	225.883	238.907
32	224.502	216.714	214.293	257.458	240.269	258.015
36	228.373	215.799	217.904	271.996	247.163	270.598
40	226.607	220.754	221.545	281.584	253.347	274.637
44	226.222	220.286	225.301	289.554	254.726	273.788
48	229.999	222.505	223.844	291.449	255.616	276.839
52	238.827	226.252	228.239	292.319	254.777	284.13
56	239.272	237.871	234.229	296.661	259.375	282.803
60	243.488	236.609	237.469	299.792	262.531	297.145
64	249.191	237.955	248.428	311.1	269.833	309.619
68	263.345	243.186	257.663	320.391	282.027	312.942
72	261.391	260.369	264.812	327.209	287.383	328.329
mut PrP+IBT21
(h)
0	100	100	100	100	100	100
4	117.543	113.907	116.704	116.238	114.738	119.696
8	129.227	126.635	137.956	128.359	126.063	131.014
12	144.795	142.024	158.236	144.517	140.956	149.333
16	159.444	151.915	172.827	162.16	161.183	167.034
20	177.687	171.083	190.559	180.253	179.279	182.425
24	190.824	182.362	206.564	195.64	196.894	202.983
28	200.631	192.298	219.571	208.843	206.786	217.889
32	211.543	204.519	232.997	224.37	219.297	232.849
36	226.125	218.208	243.242	233.482	228.359	247.2
40	240.765	225.038	257.225	250.071	245.495	262.28
44	258.25	233.419	273.134	266.173	260.064	279.905
48	273.236	248.477	294.336	283.444	272.362	289.94
52	288.648	262.145	305.328	299.051	283.09	307.372
56	305.422	273.631	318.725	316.52	293.661	324.312
60	320.348	278.665	332.047	331.343	302.649	339.69
64	333.698	293.233	350.595	344.92	319.987	349.066
68	353.702	301.926	369.908	366.963	338.894	373.405
72	359.89	314.057	380.27	381.912	361.585	386.002
Fig7G
WT PrP	90.9449	88.3493	92.2184	100.86	120.485	107.142
mut PrP	63.7359	56.7982	56.8782	64.909	63.4097	72.6519
mut PrP+IBT21	72.5303	65.8883	77.129	78.1327	75.9809	79.901
