# Supplementary figures and images for: Cell-based HTS identifies a chemical chaperone for preventing ER protein aggregation and proteotoxicity
Source: eLife journal article supplement (doi:10.7554/elife.43302), 2019-12-16

**A**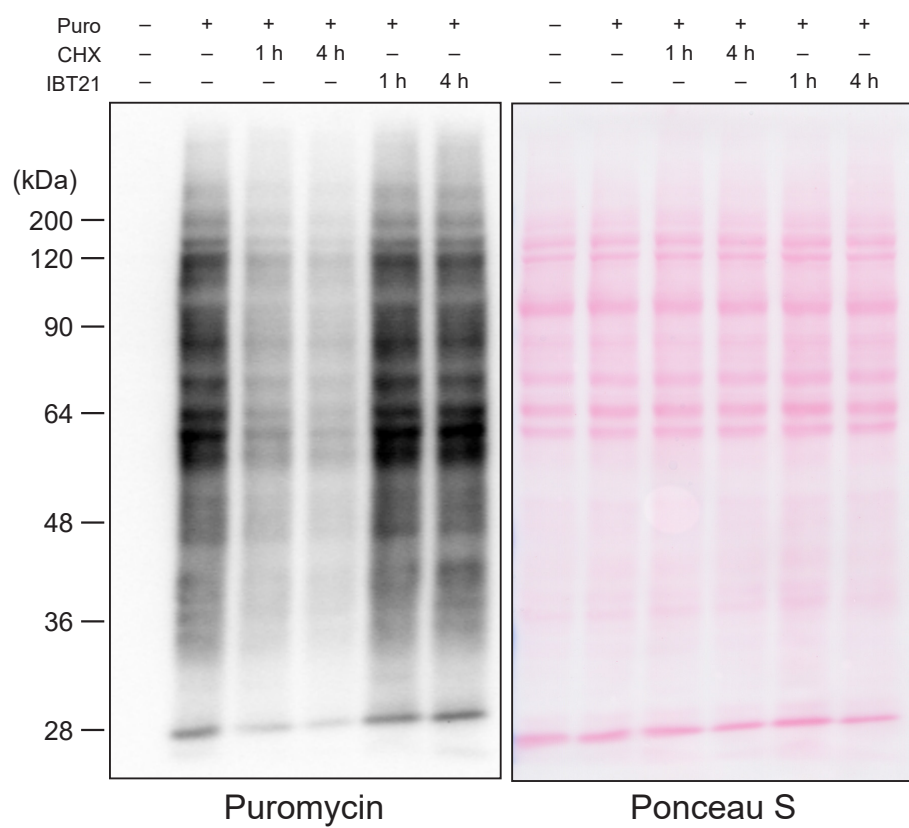**B**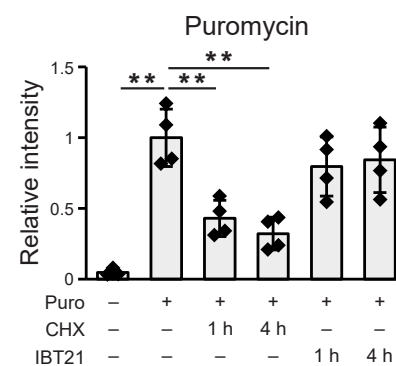

Supplement: supp [file elife-43302-supp-v1.zip › elife_poa_e43302_Figure_4_figure_supplement_3.pdf]

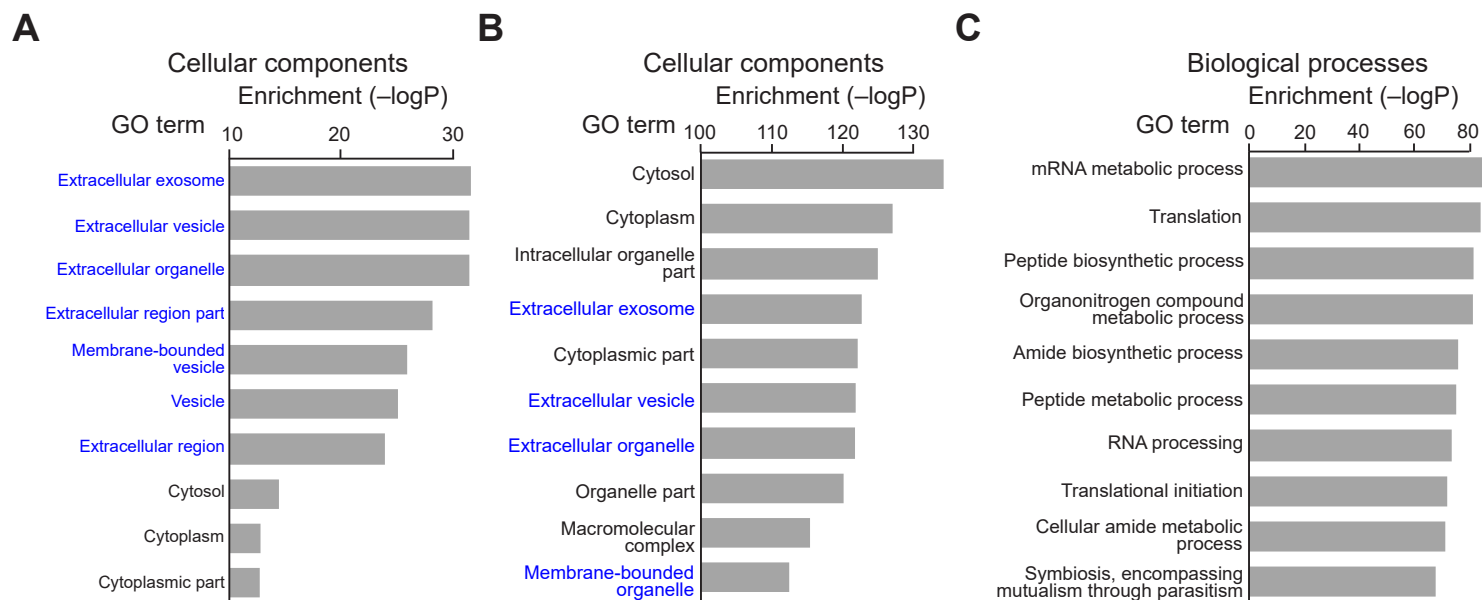

Supplement: supp [file elife-43302-supp-v1.zip › elife_poa_e43302_Figure_6_figure_supplement_1.pdf]

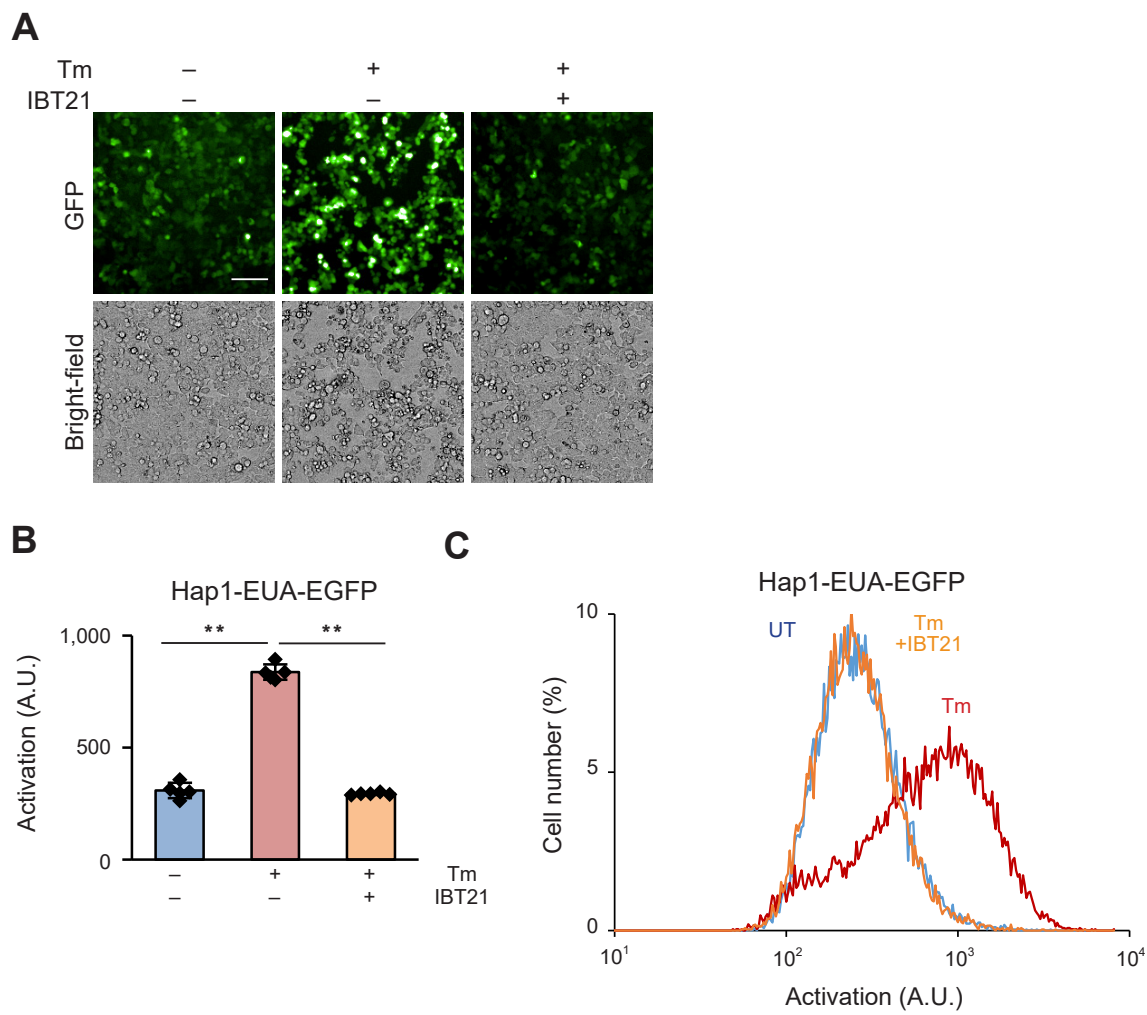

Supplement: supp [file elife-43302-supp-v1.zip › elife_poa_e43302_Figure_3_figure_supplement_1.pdf]

**A**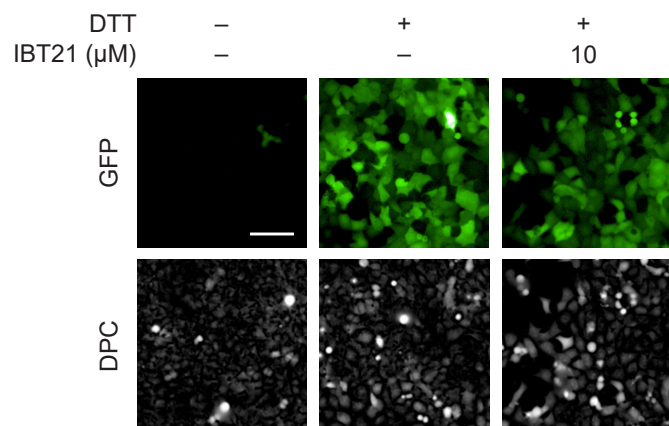**B**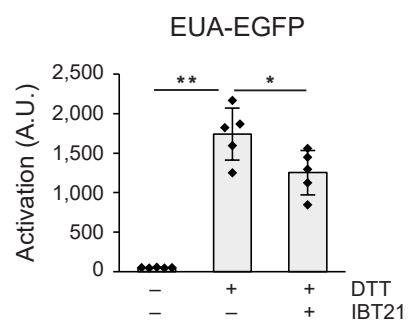

Supplement: supp [file elife-43302-supp-v1.zip › elife_poa_e43302_Figure_4_figure_supplement_4.pdf]

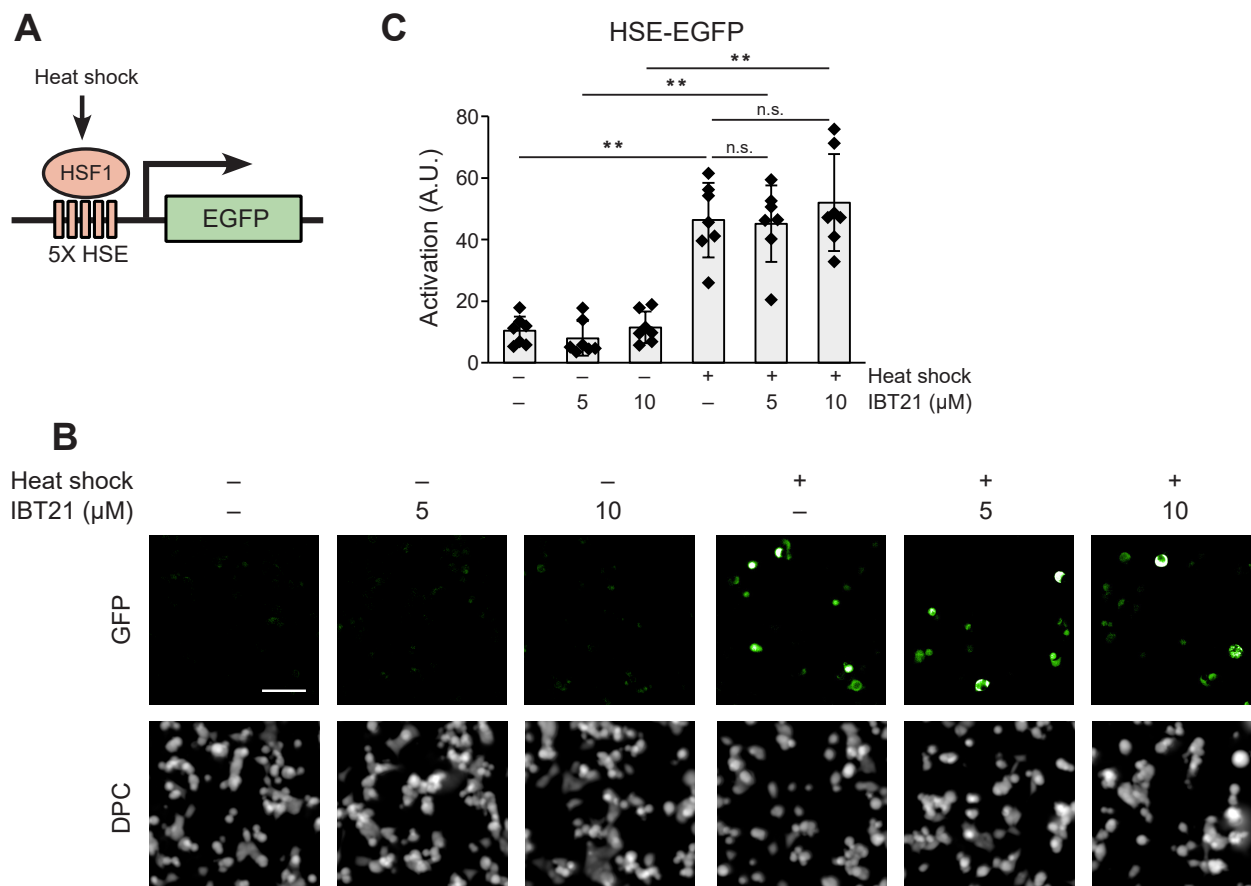

Supplement: supp [file elife-43302-supp-v1.zip › elife_poa_e43302_Figure_4_figure_supplement_5.pdf]

**A**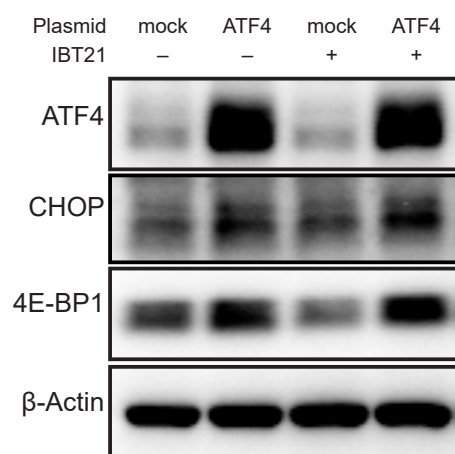**B**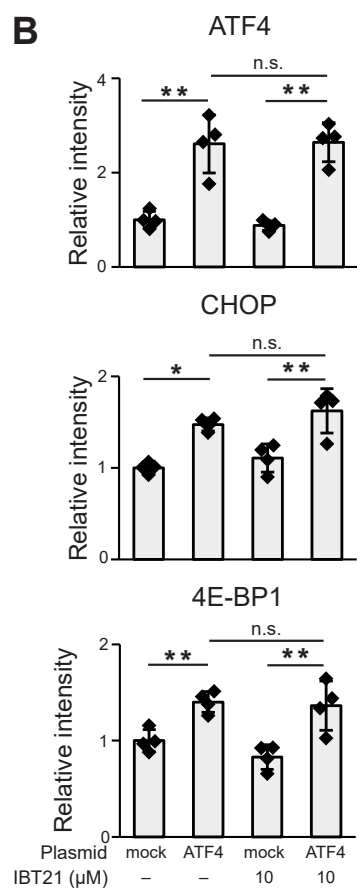**C**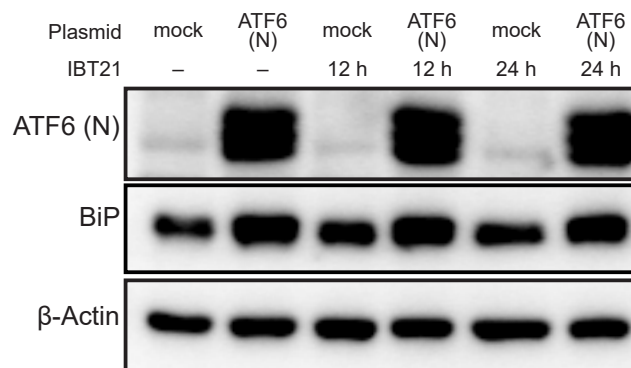**D**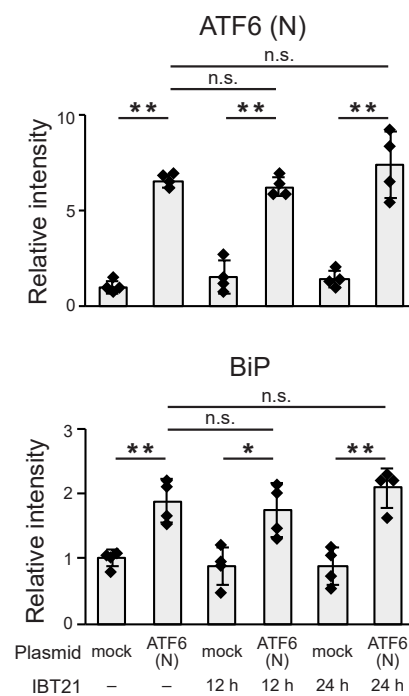

Supplement: supp [file elife-43302-supp-v1.zip › elife_poa_e43302_Figure_4_figure_supplement_2.pdf]

Figure 5-S1

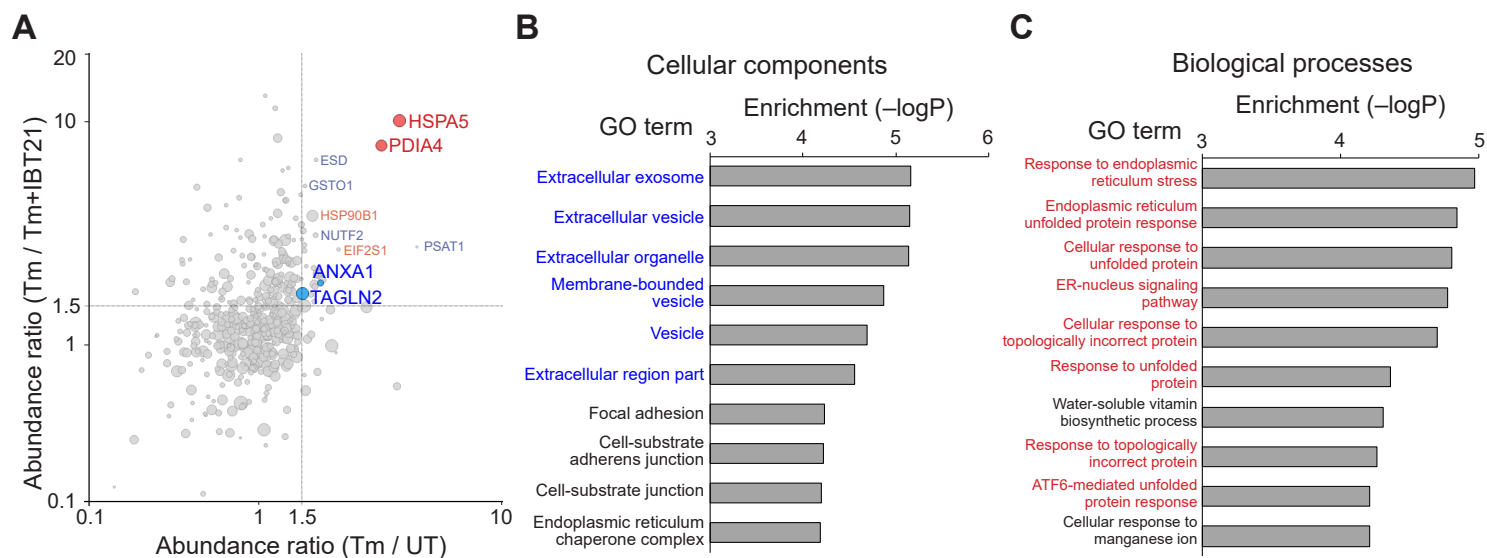

Supplement: supp [file elife-43302-supp-v1.zip › elife_poa_e43302_Figure_5_figure_supplement_1.pdf]

**A**

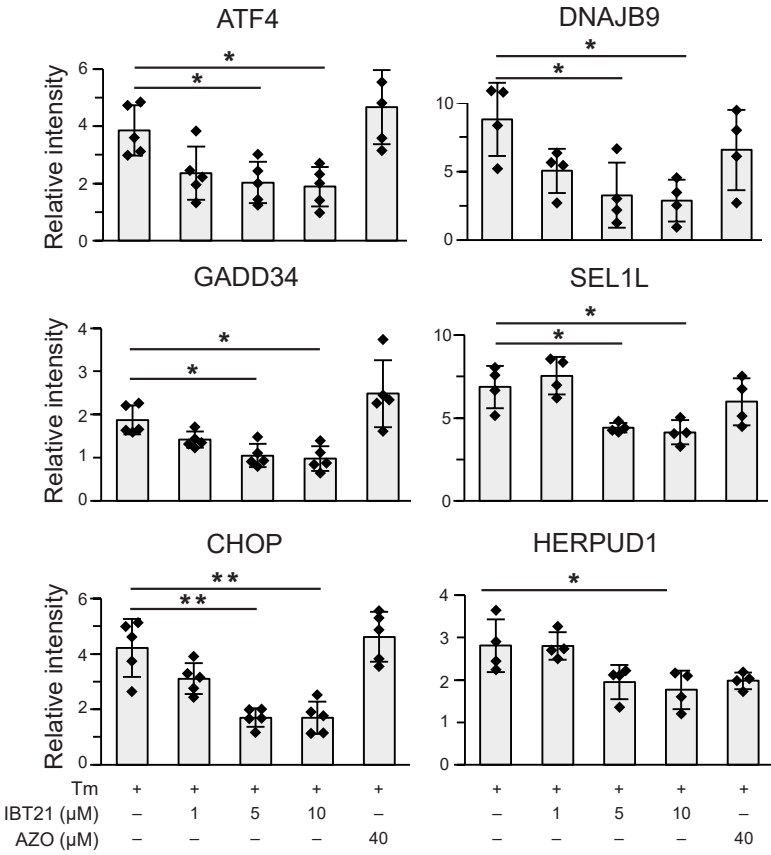

**B**

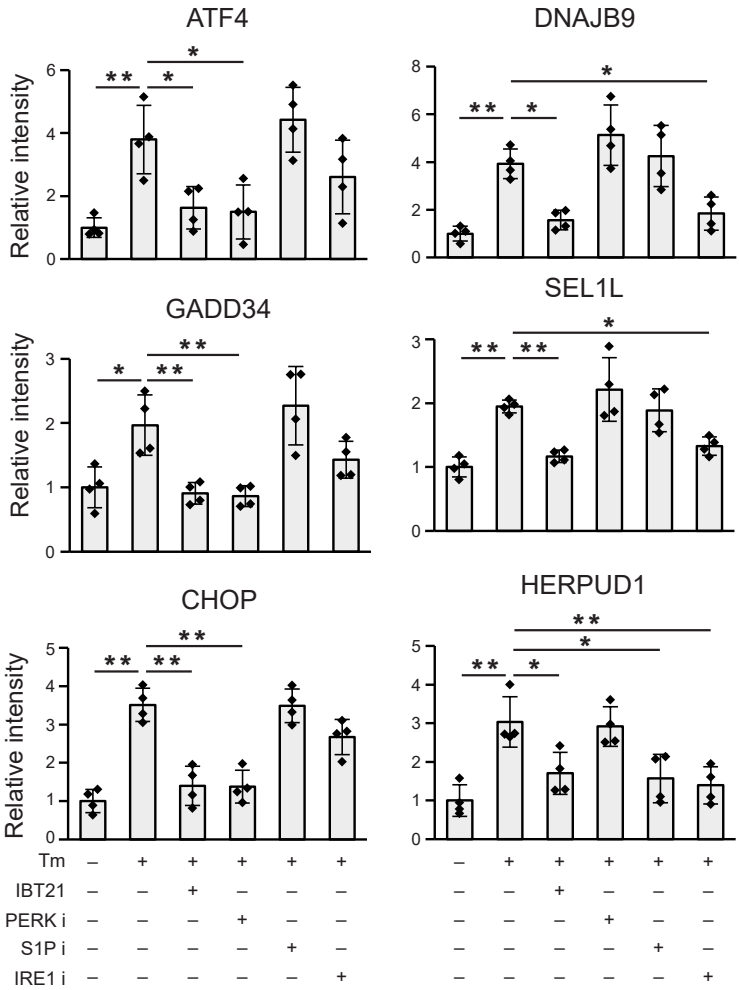

Supplement: supp [file elife-43302-supp-v1.zip › elife_poa_e43302_Figure_4_figure_supplement_1.pdf]

**A**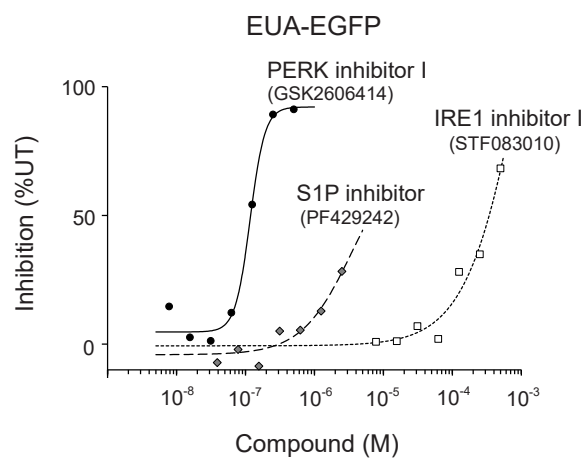**B**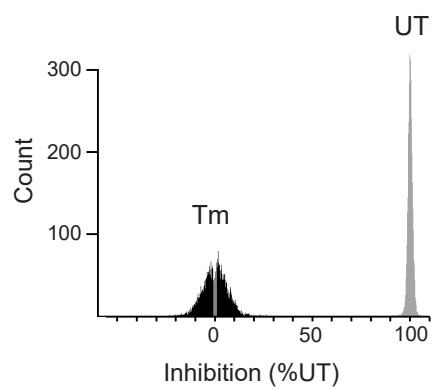**C**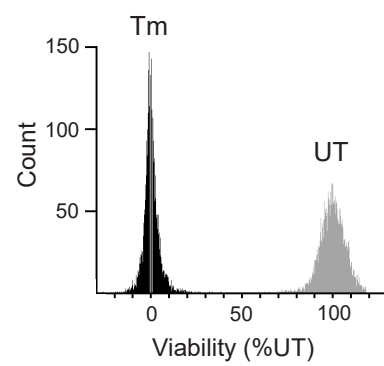

Supplement: supp [file elife-43302-supp-v1.zip › elife_poa_e43302_Figure_1_figure_supplement_1.pdf]

**A**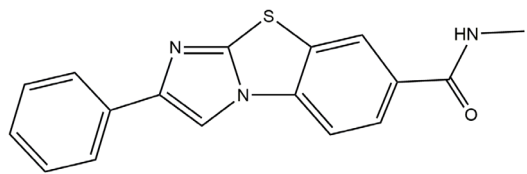

7-(methylaminocarbonyl)-2-phenylimidazo[2,1-*b*]benzothiazole (IBT29), MW 307.37

**B**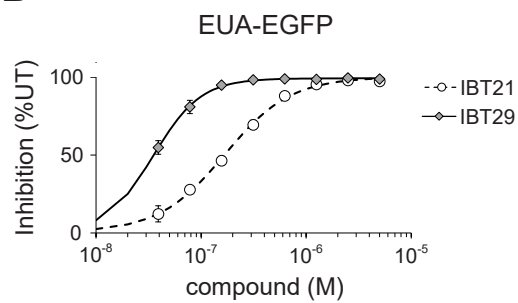

Supplement: supp [file elife-43302-supp-v1.zip › elife_poa_e43302_Figure_2_figure_supplement_2.pdf]

Figure 2–S1

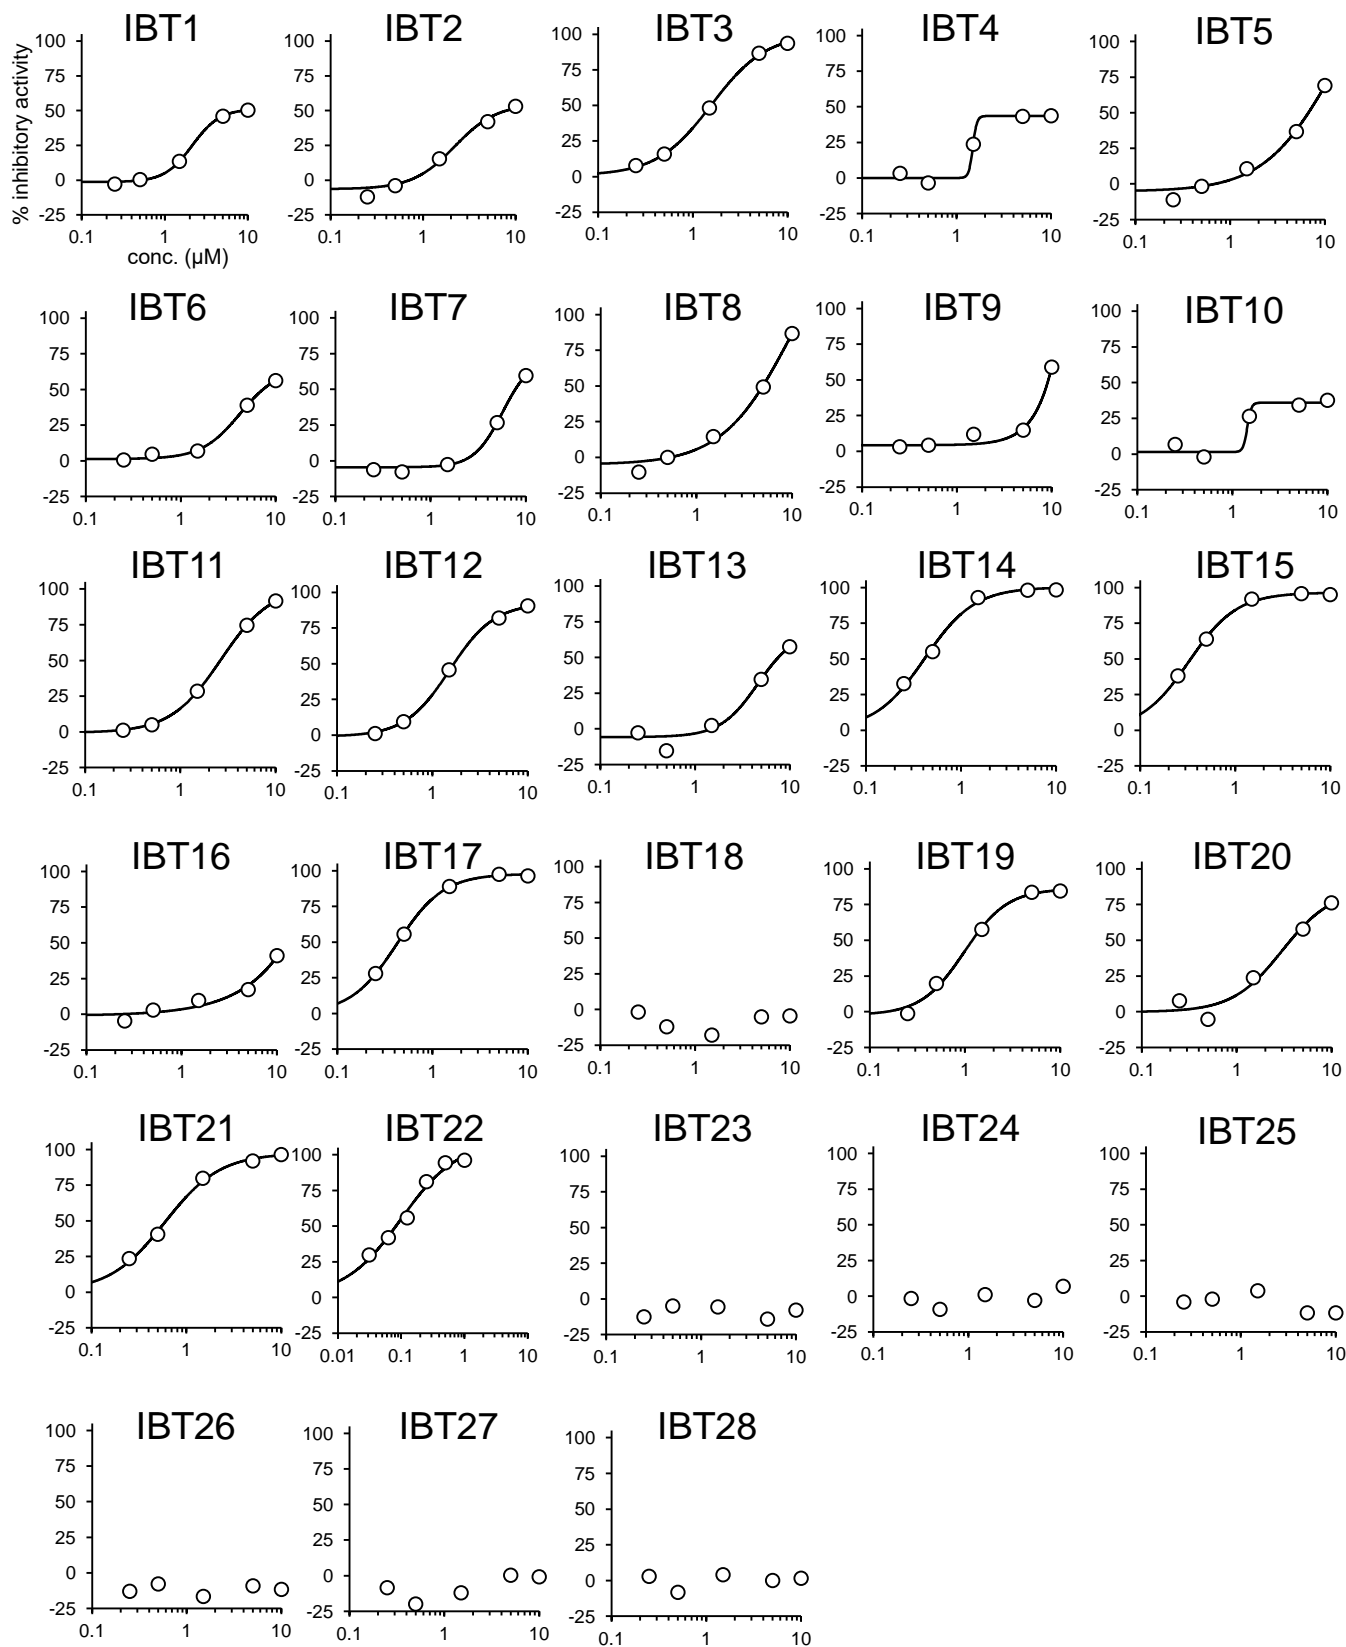

Supplement: supp [file elife-43302-supp-v1.zip › elife_poa_e43302_Figure_2_figure_supplement_1.pdf]
